# Supplementary material for: Diversification of the Caenorhabditis heat shock response by Helitron transposable elements
Source: eLife. 2019 Dec 11;8:e51139. doi: 10.7554/eLife.51139 (PMC6927752; doi:10.7554/eLife.51139)
Supplement: Supplementary file 1. — Enrichment of Transcription Factor motifs found within C. elegans Helitrons compared to genome-wide occurences. [file elife-51139-supp1.xlsx]

## Sheet: Supplemental.Table.1_TF.motifs.
Motif_ID	TF_Name	Family_Name	DBDs	DBID.1	Motif_Type	MSource_Identifier	MSource_Type	MSource_Author	MSource_Year	PMID	genome.motifs	Hel.motifs	Hels.w.motifs	fraction.in.Hels	binom.p.val	enrichment	fold.enrichment
M00682_2.00	WBGene00013134	HSF	HSF_DNA-bind	pTH10796	PBM	CEPD	PBM	Narasimhan	2015	25905672	46893	9934	1192	0.2118	0	TRUE	12.4588
M00682_2.00	hsf-1	HSF	HSF_DNA-bind	pTH10796	PBM	CEPD	PBM	Narasimhan	2015	25905672	46893	9934	1192	0.2118	0	TRUE	12.4588
M00615_2.00	lsy-2	C2H2 ZF	zf-C2H2	pTH10810	PBM	CEPD	PBM	Narasimhan	2015	25905672	43299	6367	895	0.147	0	TRUE	8.64706
M00626_2.00	lsl-1	C2H2 ZF	zf-C2H2	pTH9306	PBM	CEPD	PBM	Narasimhan	2015	25905672	40558	5649	867	0.1393	0	TRUE	8.19412
M00623_2.00	F10B5.3	C2H2 ZF	zf-C2H2	pTH9177	PBM	CEPD	PBM	Narasimhan	2015	25905672	65348	6839	1723	0.1047	0	TRUE	6.15882
M00655_2.00	dmd-6	DM	DM	pTH10816	PBM	CEPD	PBM	Narasimhan	2015	25905672	36026	1708	665	0.0474	3.39388514097727e-319	TRUE	2.78824
M00675_2.00	ceh-57	Homeodomain	Homeobox	pTH10772	PBM	CEPD	PBM	Narasimhan	2015	25905672	10742	453	307	0.0422	2.56377e-70	TRUE	2.48235
M00707_2.00	mbr-1	Pipsqueak	HTH_psq	pTH10031	PBM	CEPD	PBM	Narasimhan	2015	25905672	24699	1026	539	0.0415	3.58982e-152	TRUE	2.44118
M00631_2.00	ztf-6	C2H2 ZF	zf-C2H2	pTH9958	PBM	CEPD	PBM	Narasimhan	2015	25905672	53982	2215	958	0.041	3.02484774747261e-318	TRUE	2.41176
M00646_2.00	syd-9	C2H2 ZF	zf-C2H2	pTH10717	PBM	CEPD	PBM	Narasimhan	2015	25905672	13632	522	405	0.0383	1.01173e-66	TRUE	2.25294
M00695_2.00	nhr-28	Nuclear receptor	zf-C4	pTH9174	PBM	CEPD	PBM	Narasimhan	2015	25905672	19907	734	437	0.0369	1.26922e-85	TRUE	2.17059
M00695_2.00	nhr-53	Nuclear receptor	zf-C4	pTH9174	PBM	CEPD	PBM	Narasimhan	2015	25905672	19907	734	437	0.0369	1.26922e-85	TRUE	2.17059
M00695_2.00	nhr-70	Nuclear receptor	zf-C4	pTH9174	PBM	CEPD	PBM	Narasimhan	2015	25905672	19907	734	437	0.0369	1.26922e-85	TRUE	2.17059
M00697_2.00	odr-7	Nuclear receptor	zf-C4	pTH9323	PBM	CEPD	PBM	Narasimhan	2015	25905672	17622	613	503	0.0348	8.33199e-63	TRUE	2.04706
M00662_2.00	efl-2	E2F	E2F_TDP	pTH9173	PBM	CEPD	PBM	Narasimhan	2015	25905672	48723	1496	720	0.0307	7.18179e-108	TRUE	1.80588
M00669_2.00	med-1	GATA	GATA	pTH10768	PBM	CEPD	PBM	Narasimhan	2015	25905672	9691	294	197	0.0303	6.43177e-22	TRUE	1.78235
M00669_2.00	med-2	GATA	GATA	pTH10768	PBM	CEPD	PBM	Narasimhan	2015	25905672	9691	294	197	0.0303	6.43177e-22	TRUE	1.78235
M00621_2.00	ref-2	C2H2 ZF	zf-C2H2	pTH9089	PBM	CEPD	PBM	Narasimhan	2015	25905672	34240	964	581	0.0282	2.76906e-53	TRUE	1.65882
M00613_2.00	lin-29	C2H2 ZF	zf-C2H2	pTH9930	PBM	CEPD	PBM	Narasimhan	2015	25905672	107752	2953	1280	0.0274	1.8513e-144	TRUE	1.61176
M00654_2.00	mab-23	DM	DM	pTH9082	PBM	CEPD	PBM	Narasimhan	2015	25905672	39758	1069	560	0.0269	7.53976e-50	TRUE	1.58235
M00634_2.00	slr-2	C2H2 ZF	zf-C2H2	pTH10040	PBM	CEPD	PBM	Narasimhan	2015	25905672	30720	822	495	0.0268	4.25397e-38	TRUE	1.57647
M00639_2.00	C46E10.8	C2H2 ZF	zf-C2H2	pTH9900	PBM	CEPD	PBM	Narasimhan	2015	25905672	22876	569	437	0.0249	4.6297e-20	TRUE	1.46471
M00606_2.00	zip-11	bZIP	bZIP_1	pTH9916	PBM	CEPD	PBM	Narasimhan	2015	25905672	22271	541	226	0.0243	3.01328e-17	TRUE	1.42941
M00652_2.00	Y75B8A.6	CxxC	zf-CXXC	pTH10798	PBM	CEPD	PBM	Narasimhan	2015	25905672	20500	494	298	0.0241	2.82476e-15	TRUE	1.41765
M00638_2.00	B0310.2	C2H2 ZF	zf-C2H2	pTH10823	PBM	CEPD	PBM	Narasimhan	2015	25905672	20636	496	246	0.024	3.53938e-15	TRUE	1.41176
M00683_2.00	madf-4	MADF	MADF_DNA_bdg	pTH9096	PBM	CEPD	PBM	Narasimhan	2015	25905672	18970	453	211	0.0239	1.55392e-13	TRUE	1.40588
M00694_2.00	nhr-66	Nuclear receptor	zf-C4	pTH10034	PBM	CEPD	PBM	Narasimhan	2015	25905672	18730	435	393	0.0232	1.99358e-11	TRUE	1.36471
M00633_2.00	Y53H1A.2	C2H2 ZF	zf-C2H2	pTH9934	PBM	CEPD	PBM	Narasimhan	2015	25905672	60355	1352	675	0.0224	4.60002e-26	TRUE	1.31765
M00617_2.00	klf-3	C2H2 ZF	zf-C2H2	pTH9072	PBM	CEPD	PBM	Narasimhan	2015	25905672	35476	779	449	0.022	6.08694e-14	TRUE	1.29412
M00650_2.00	ztf-11	C2HC ZF	zf-C2HC	pTH9925	PBM	CEPD	PBM	Narasimhan	2015	25905672	32112	686	514	0.0214	2.06118e-10	TRUE	1.25882
M00595_2.00	atf-7	bZIP	bZIP_1	pTH9314	PBM	CEPD	PBM	Narasimhan	2015	25905672	26707	555	225	0.0208	3.41082e-07	TRUE	1.22353
M00632_2.00	sptf-3	C2H2 ZF	zf-C2H2	pTH9394	PBM	CEPD	PBM	Narasimhan	2015	25905672	34150	709	431	0.0208	9.63492e-09	TRUE	1.22353
M00673_2.00	ceh-36	Homeodomain	Homeobox	pTH10730	PBM	CEPD	PBM	Narasimhan	2015	25905672	8542	176	137	0.0206	0.00523397	TRUE	1.21176
M00702_2.00	nhr-182	Nuclear receptor	zf-C4	pTH6106	PBM	CEPD	PBM	Narasimhan	2015	25905672	27535	559	420	0.0203	4.82125e-06	TRUE	1.19412
M00601_2.00	zip-3	bZIP	bZIP_1	pTH9915	PBM	CEPD	PBM	Narasimhan	2015	25905672	30790	620	264	0.0201	3.57514e-06	TRUE	1.18235
M00622_2.00	egrh-2	C2H2 ZF	zf-C2H2	pTH9317	PBM	CEPD	PBM	Narasimhan	2015	25905672	57077	1076	561	0.0189	7.09782e-05	TRUE	1.11176
M00622_2.00	egrh-1	C2H2 ZF	zf-C2H2	pTH9317	PBM	CEPD	PBM	Narasimhan	2015	25905672	57077	1076	561	0.0189	7.09782e-05	TRUE	1.11176
M00698_2.00	nhr-207	Nuclear receptor	zf-C4	pTH10650	PBM	CEPD	PBM	Narasimhan	2015	25905672	26660	503	285	0.0189	0.00594313	TRUE	1.11176
M00698_2.00	nhr-209	Nuclear receptor	zf-C4	pTH10650	PBM	CEPD	PBM	Narasimhan	2015	25905672	26660	503	285	0.0189	0.00594313	TRUE	1.11176
M00698_2.00	nhr-154	Nuclear receptor	zf-C4	pTH10650	PBM	CEPD	PBM	Narasimhan	2015	25905672	26660	503	285	0.0189	0.00594313	TRUE	1.11176
M00698_2.00	nhr-173	Nuclear receptor	zf-C4	pTH10650	PBM	CEPD	PBM	Narasimhan	2015	25905672	26660	503	285	0.0189	0.00594313	TRUE	1.11176
M00698_2.00	nhr-208	Nuclear receptor	zf-C4	pTH10650	PBM	CEPD	PBM	Narasimhan	2015	25905672	26660	503	285	0.0189	0.00594313	TRUE	1.11176
M00698_2.00	nhr-153	Nuclear receptor	zf-C4	pTH10650	PBM	CEPD	PBM	Narasimhan	2015	25905672	26660	503	285	0.0189	0.00594313	TRUE	1.11176
M00698_2.00	nhr-206	Nuclear receptor	zf-C4	pTH10650	PBM	CEPD	PBM	Narasimhan	2015	25905672	26660	503	285	0.0189	0.00594313	TRUE	1.11176
M00698_2.00	nhr-136	Nuclear receptor	zf-C4	pTH10650	PBM	CEPD	PBM	Narasimhan	2015	25905672	26660	503	285	0.0189	0.00594313	TRUE	1.11176
M00593_2.00	atf-5	bZIP	bZIP_1	pTH9911	PBM	CEPD	PBM	Narasimhan	2015	25905672	29414	550	221	0.0187	0.00771496	TRUE	1.1
M00658_2.00	dmd-3	DM	DM	pTH10638	PBM	CEPD	PBM	Narasimhan	2015	25905672	26607	487	397	0.0183	0.0418758	TRUE	1.07647
M00647_2.00	egrh-3	C2H2 ZF	zf-C2H2	pTH10722	PBM	CEPD	PBM	Narasimhan	2015	25905672	55817	1005	429	0.018	0.0165818	TRUE	1.05882
M00657_2.00	dmd-10	DM	DM	pTH9142	PBM	CEPD	PBM	Narasimhan	2015	25905672	33237	542	456	0.0163	0.578049	FALSE	0.958824
M00637_2.00	klu-1	C2H2 ZF	zf-C2H2	pTH9355	PBM	CEPD	PBM	Narasimhan	2015	25905672	56902	918	459	0.0161	0.280586	FALSE	0.947059
M00618_2.00	odd-2	C2H2 ZF	zf-C2H2	pTH9150	PBM	CEPD	PBM	Narasimhan	2015	25905672	27295	430	367	0.0158	0.219686	FALSE	0.929412
M00612_2.00	ham-2	C2H2 ZF	zf-C2H2	pTH9149	PBM	CEPD	PBM	Narasimhan	2015	25905672	23380	366	238	0.0157	0.202399	FALSE	0.923529
M00677_2.00	ceh-90	Homeodomain	Homeobox	pTH10654	PBM	CEPD	PBM	Narasimhan	2015	25905672	10571	164	143	0.0155	0.343195	FALSE	0.911765
M00610_2.00	die-1	C2H2 ZF	zf-C2H2	pTH9709	PBM	CEPD	PBM	Narasimhan	2015	25905672	32666	495	427	0.0152	0.0248861	FALSE	0.894118
M00620_2.00	pat-9	C2H2 ZF	zf-C2H2	pTH10808	PBM	CEPD	PBM	Narasimhan	2015	25905672	10371	152	130	0.0147	0.0997925	FALSE	0.864706
M00649_2.00	scrt-1	C2H2 ZF	zf-C2H2	pTH10623	PBM	CEPD	PBM	Narasimhan	2015	25905672	58381	860	575	0.0147	0.000115528	FALSE	0.864706
M00679_2.00	ceh-53	Homeodomain	Homeobox	pTH10699	PBM	CEPD	PBM	Narasimhan	2015	25905672	8253	120	103	0.0145	0.122442	FALSE	0.852941
M00645_2.00	klu-2	C2H2 ZF	zf-C2H2	pTH9354	PBM	CEPD	PBM	Narasimhan	2015	25905672	55586	795	473	0.0143	4.31661e-06	FALSE	0.841176
M00706_2.00	pax-2	Paired box	PAX	pTH10794	PBM	CEPD	PBM	Narasimhan	2015	25905672	20442	291	254	0.0142	0.00457889	FALSE	0.835294
M00714_2.00	tbx-37	T-box	T-box	pTH9462	PBM	CEPD	PBM	Narasimhan	2015	25905672	22569	319	275	0.0141	0.00185011	FALSE	0.829412
M00714_2.00	tbx-38	T-box	T-box	pTH9462	PBM	CEPD	PBM	Narasimhan	2015	25905672	22569	319	275	0.0141	0.00185011	FALSE	0.829412
M00627_2.00	K11D2.4	C2H2 ZF	zf-C2H2	pTH10797	PBM	CEPD	PBM	Narasimhan	2015	25905672	59702	808	563	0.0135	2.1916e-10	FALSE	0.794118
M00619_2.00	pag-3	C2H2 ZF	zf-C2H2	pTH9969	PBM	CEPD	PBM	Narasimhan	2015	25905672	28176	377	301	0.0134	5.35179e-06	FALSE	0.788235
M00635_2.00	ztf-29	C2H2 ZF	zf-C2H2	pTH10041	PBM	CEPD	PBM	Narasimhan	2015	25905672	30333	406	322	0.0134	2.34388e-06	FALSE	0.788235
M00587_2.00	bed-3	BED ZF	zf-BED	pTH9056	PBM	CEPD	PBM	Narasimhan	2015	25905672	23164	304	248	0.0131	8.37731e-06	FALSE	0.770588
M00674_2.00	ceh-37	Homeodomain	Homeobox	pTH10716	PBM	CEPD	PBM	Narasimhan	2015	25905672	8131	104	86	0.0128	0.00433168	FALSE	0.752941
M00659_2.00	dmd-5	DM	DM	pTH10777	PBM	CEPD	PBM	Narasimhan	2015	25905672	21729	267	197	0.0123	6.96821e-08	FALSE	0.723529
M00709_2.00	daf-19	RFX	RFX_DNA_binding	pTH10021	PBM	CEPD	PBM	Narasimhan	2015	25905672	13246	162	87	0.0122	2.30579e-05	FALSE	0.717647
M00660_2.00	dmd-8	DM	DM	pTH10837	PBM	CEPD	PBM	Narasimhan	2015	25905672	39191	476	361	0.0121	6.40769e-14	FALSE	0.711765
M00664_2.00	let-381	Forkhead	Forkhead	pTH9057	PBM	CEPD	PBM	Narasimhan	2015	25905672	4464	54	51	0.0121	0.0122135	FALSE	0.711765
M00672_2.00	ceh-34	Homeodomain	Homeobox	pTH9708	PBM	CEPD	PBM	Narasimhan	2015	25905672	15255	182	142	0.0119	1.00869e-06	FALSE	0.7
M00699_2.00	nhr-60	Nuclear receptor	zf-C4	pTH10013	PBM	CEPD	PBM	Narasimhan	2015	25905672	21249	252	232	0.0119	4.095e-09	FALSE	0.7
M00699_2.00	nhr-116	Nuclear receptor	zf-C4	pTH10013	PBM	CEPD	PBM	Narasimhan	2015	25905672	21249	252	232	0.0119	4.095e-09	FALSE	0.7
M00699_2.00	nhr-168	Nuclear receptor	zf-C4	pTH10013	PBM	CEPD	PBM	Narasimhan	2015	25905672	21249	252	232	0.0119	4.095e-09	FALSE	0.7
M00699_2.00	nhr-141	Nuclear receptor	zf-C4	pTH10013	PBM	CEPD	PBM	Narasimhan	2015	25905672	21249	252	232	0.0119	4.095e-09	FALSE	0.7
M00628_2.00	ztf-14	C2H2 ZF	zf-C2H2	pTH10795	PBM	CEPD	PBM	Narasimhan	2015	25905672	38346	449	361	0.0117	2.88028e-16	FALSE	0.688235
M00691_2.00	nhr-237	Nuclear receptor	zf-C4	pTH9085	PBM	CEPD	PBM	Narasimhan	2015	25905672	24426	285	209	0.0117	5.44279e-11	FALSE	0.688235
M00691_2.00	nhr-42	Nuclear receptor	zf-C4	pTH9085	PBM	CEPD	PBM	Narasimhan	2015	25905672	24426	285	209	0.0117	5.44279e-11	FALSE	0.688235
M00630_2.00	T22C8.4	C2H2 ZF	zf-C2H2	pTH10037	PBM	CEPD	PBM	Narasimhan	2015	25905672	19862	226	174	0.0114	3.44784e-10	FALSE	0.670588
M00624_2.00	lsy-27	C2H2 ZF	zf-C2H2	pTH10630	PBM	CEPD	PBM	Narasimhan	2015	25905672	46253	517	420	0.0112	1.48158e-23	FALSE	0.658824
M00663_2.00	fkh-9	Forkhead	Forkhead	pTH9957	PBM	CEPD	PBM	Narasimhan	2015	25905672	36019	400	341	0.0111	4.12938e-19	FALSE	0.652941
M00689_2.00	nhr-7	Nuclear receptor	zf-C4	pTH10645	PBM	CEPD	PBM	Narasimhan	2015	25905672	15565	173	128	0.0111	5.16212e-09	FALSE	0.652941
M00689_2.00	nhr-31	Nuclear receptor	zf-C4	pTH10645	PBM	CEPD	PBM	Narasimhan	2015	25905672	15565	173	128	0.0111	5.16212e-09	FALSE	0.652941
M00689_2.00	nhr-119	Nuclear receptor	zf-C4	pTH10645	PBM	CEPD	PBM	Narasimhan	2015	25905672	15565	173	128	0.0111	5.16212e-09	FALSE	0.652941
M00701_2.00	nhr-99	Nuclear receptor	zf-C4	pTH10779	PBM	CEPD	PBM	Narasimhan	2015	25905672	24144	264	238	0.0109	4.35016e-14	FALSE	0.641176
M00701_2.00	nhr-130	Nuclear receptor	zf-C4	pTH10779	PBM	CEPD	PBM	Narasimhan	2015	25905672	24144	264	238	0.0109	4.35016e-14	FALSE	0.641176
M00701_2.00	WBGene00003673	Nuclear receptor	zf-C4	pTH10779	PBM	CEPD	PBM	Narasimhan	2015	25905672	24144	264	238	0.0109	4.35016e-14	FALSE	0.641176
M00701_2.00	nhr-202	Nuclear receptor	zf-C4	pTH10779	PBM	CEPD	PBM	Narasimhan	2015	25905672	24144	264	238	0.0109	4.35016e-14	FALSE	0.641176
M00701_2.00	nhr-201	Nuclear receptor	zf-C4	pTH10779	PBM	CEPD	PBM	Narasimhan	2015	25905672	24144	264	238	0.0109	4.35016e-14	FALSE	0.641176
M00701_2.00	nhr-59	Nuclear receptor	zf-C4	pTH10779	PBM	CEPD	PBM	Narasimhan	2015	25905672	24144	264	238	0.0109	4.35016e-14	FALSE	0.641176
M00701_2.00	nhr-182	Nuclear receptor	zf-C4	pTH10779	PBM	CEPD	PBM	Narasimhan	2015	25905672	24144	264	238	0.0109	4.35016e-14	FALSE	0.641176
M00701_2.00	nhr-98	Nuclear receptor	zf-C4	pTH10779	PBM	CEPD	PBM	Narasimhan	2015	25905672	24144	264	238	0.0109	4.35016e-14	FALSE	0.641176
M00701_2.00	nhr-123	Nuclear receptor	zf-C4	pTH10779	PBM	CEPD	PBM	Narasimhan	2015	25905672	24144	264	238	0.0109	4.35016e-14	FALSE	0.641176
M00701_2.00	nhr-212	Nuclear receptor	zf-C4	pTH10779	PBM	CEPD	PBM	Narasimhan	2015	25905672	24144	264	238	0.0109	4.35016e-14	FALSE	0.641176
M00701_2.00	nhr-183	Nuclear receptor	zf-C4	pTH10779	PBM	CEPD	PBM	Narasimhan	2015	25905672	24144	264	238	0.0109	4.35016e-14	FALSE	0.641176
M00701_2.00	nhr-44	Nuclear receptor	zf-C4	pTH10779	PBM	CEPD	PBM	Narasimhan	2015	25905672	24144	264	238	0.0109	4.35016e-14	FALSE	0.641176
M00705_2.00	nhr-216	Nuclear receptor	zf-C4	pTH10811	PBM	CEPD	PBM	Narasimhan	2015	25905672	23738	258	220	0.0109	3.88525e-14	FALSE	0.641176
M00692_2.00	nhr-46	Nuclear receptor	zf-C4	pTH9924	PBM	CEPD	PBM	Narasimhan	2015	25905672	23401	246	195	0.0105	1.00829e-15	FALSE	0.617647
M00625_2.00	F52B5.7	C2H2 ZF	zf-C2H2	pTH10024	PBM	CEPD	PBM	Narasimhan	2015	25905672	12250	127	91	0.0104	3.2577e-09	FALSE	0.611765
M00640_2.00	ztf-3	C2H2 ZF	zf-C2H2	pTH10629	PBM	CEPD	PBM	Narasimhan	2015	25905672	35530	371	201	0.0104	1.37808e-23	FALSE	0.611765
M00590_2.00	Y44A6D.3	Brinker	BrkDBD	pTH10696	PBM	CEPD	PBM	Narasimhan	2015	25905672	27887	280	215	0.01	2.55316e-21	FALSE	0.588235
M00678_2.00	ceh-51	Homeodomain	Homeobox	pTH9353	PBM	CEPD	PBM	Narasimhan	2015	25905672	18196	181	121	0.0099	7.6054e-15	FALSE	0.582353
M00715_2.00	tbx-39	T-box	T-box	pTH9884	PBM	CEPD	PBM	Narasimhan	2015	25905672	20543	201	166	0.0098	2.62988e-17	FALSE	0.576471
M00598_2.00	zip-6	bZIP	bZIP_1	pTH10633	PBM	CEPD	PBM	Narasimhan	2015	25905672	20093	191	157	0.0095	2.14647e-18	FALSE	0.558824
M00600_2.00	zip-10	bZIP	bZIP_1	pTH9132	PBM	CEPD	PBM	Narasimhan	2015	25905672	11844	113	100	0.0095	2.65186e-11	FALSE	0.558824
M00700_2.00	nhr-178	Nuclear receptor	zf-C4	pTH10647	PBM	CEPD	PBM	Narasimhan	2015	25905672	19547	182	152	0.0093	5.70393e-19	FALSE	0.547059
M00700_2.00	nhr-232	Nuclear receptor	zf-C4	pTH10647	PBM	CEPD	PBM	Narasimhan	2015	25905672	19547	182	152	0.0093	5.70393e-19	FALSE	0.547059
M00700_2.00	nhr-45	Nuclear receptor	zf-C4	pTH10647	PBM	CEPD	PBM	Narasimhan	2015	25905672	19547	182	152	0.0093	5.70393e-19	FALSE	0.547059
M00700_2.00	nhr-231	Nuclear receptor	zf-C4	pTH10647	PBM	CEPD	PBM	Narasimhan	2015	25905672	19547	182	152	0.0093	5.70393e-19	FALSE	0.547059
M00611_2.00	egl-43	C2H2 ZF	zf-C2H2	pTH10718	PBM	CEPD	PBM	Narasimhan	2015	25905672	24204	223	177	0.0092	8.96556e-24	FALSE	0.541176
M00716_2.00	tbx-43	T-box	T-box	pTH10927	PBM	CEPD	PBM	Narasimhan	2015	25905672	22009	198	170	0.009	4.75418e-23	FALSE	0.529412
M00688_2.00	nhr-5	Nuclear receptor	zf-C4	pTH10042	PBM	CEPD	PBM	Narasimhan	2015	25905672	21014	187	153	0.0089	1.17556e-22	FALSE	0.523529
M00641_2.00	bcl-11	C2H2 ZF	zf-C2H2	pTH10807	PBM	CEPD	PBM	Narasimhan	2015	25905672	18975	165	156	0.0087	1.03067e-21	FALSE	0.511765
M00690_2.00	nhr-61	Nuclear receptor	zf-C4	pTH9907	PBM	CEPD	PBM	Narasimhan	2015	25905672	27070	235	185	0.0087	1.719e-30	FALSE	0.511765
M00690_2.00	nhr-62	Nuclear receptor	zf-C4	pTH9907	PBM	CEPD	PBM	Narasimhan	2015	25905672	27070	235	185	0.0087	1.719e-30	FALSE	0.511765
M00690_2.00	nhr-118	Nuclear receptor	zf-C4	pTH9907	PBM	CEPD	PBM	Narasimhan	2015	25905672	27070	235	185	0.0087	1.719e-30	FALSE	0.511765
M00690_2.00	nhr-21	Nuclear receptor	zf-C4	pTH9907	PBM	CEPD	PBM	Narasimhan	2015	25905672	27070	235	185	0.0087	1.719e-30	FALSE	0.511765
M00690_2.00	nhr-138	Nuclear receptor	zf-C4	pTH9907	PBM	CEPD	PBM	Narasimhan	2015	25905672	27070	235	185	0.0087	1.719e-30	FALSE	0.511765
M00690_2.00	nhr-34	Nuclear receptor	zf-C4	pTH9907	PBM	CEPD	PBM	Narasimhan	2015	25905672	27070	235	185	0.0087	1.719e-30	FALSE	0.511765
M00690_2.00	nhr-100	Nuclear receptor	zf-C4	pTH9907	PBM	CEPD	PBM	Narasimhan	2015	25905672	27070	235	185	0.0087	1.719e-30	FALSE	0.511765
M00690_2.00	nhr-4	Nuclear receptor	zf-C4	pTH9907	PBM	CEPD	PBM	Narasimhan	2015	25905672	27070	235	185	0.0087	1.719e-30	FALSE	0.511765
M00629_2.00	ztf-27	C2H2 ZF	zf-C2H2	pTH9165	PBM	CEPD	PBM	Narasimhan	2015	25905672	29069	251	201	0.0086	5.15382e-33	FALSE	0.505882
M00651_2.00	mex-6	CCCH ZF	zf-CCCH	pTH9951	PBM	CEPD	PBM	Narasimhan	2015	25905672	16041	137	122	0.0085	2.3717e-19	FALSE	0.5
M00644_2.00	ztf-16	C2H2 ZF	zf-C2H2	pTH10805	PBM	CEPD	PBM	Narasimhan	2015	25905672	25593	216	157	0.0084	8.60181e-31	FALSE	0.494118
M01989_2.00	daf-16	Forkhead	Forkhead	pTH8995	PBM	Zoo_01	PBM	Weirauch	2014	25215497	14233	116	110	0.0082	5.50936e-19	FALSE	0.482353
M00594_2.00	atf-6	bZIP	bZIP_1	pTH9159	PBM	CEPD	PBM	Narasimhan	2015	25905672	17803	145	136	0.0081	1.90762e-23	FALSE	0.476471
M00614_2.00	lin-48	C2H2 ZF	zf-C2H2	pTH9155	PBM	CEPD	PBM	Narasimhan	2015	25905672	8026	64	51	0.008	1.03973e-11	FALSE	0.470588
M00648_2.00	bnc-1	C2H2 ZF	zf-C2H2	pTH10026	PBM	CEPD	PBM	Narasimhan	2015	25905672	24090	193	152	0.008	2.26563e-32	FALSE	0.470588
M00693_2.00	nhr-65	Nuclear receptor	zf-C4	pTH9137	PBM	CEPD	PBM	Narasimhan	2015	25905672	28377	226	174	0.008	2.93532e-38	FALSE	0.470588
M00708_2.00	pros-1	Prospero	HPD	pTH9164	PBM	CEPD	PBM	Narasimhan	2015	25905672	24594	189	164	0.0077	1.01004e-35	FALSE	0.452941
M00616_2.00	mnm-2	C2H2 ZF	zf-C2H2	pTH9080	PBM	CEPD	PBM	Narasimhan	2015	25905672	25814	188	169	0.0073	3.2639e-41	FALSE	0.429412
M00712_2.00	pop-1	Sox	HMG_box	pTH9135	PBM	CEPD	PBM	Narasimhan	2015	25905672	22107	162	146	0.0073	4.82543e-35	FALSE	0.429412
M00589_2.00	hlh-16	bHLH	HLH	pTH9974	PBM	CEPD	PBM	Narasimhan	2015	25905672	16726	121	93	0.0072	1.53801e-27	FALSE	0.423529
M00685_2.00	daf-12	Nuclear receptor	zf-C4	pTH9108	PBM	CEPD	PBM	Narasimhan	2015	25905672	22986	165	157	0.0072	1.03901e-37	FALSE	0.423529
M00685_2.00	nhr-48	Nuclear receptor	zf-C4	pTH9108	PBM	CEPD	PBM	Narasimhan	2015	25905672	22986	165	157	0.0072	1.03901e-37	FALSE	0.423529
M00685_2.00	nhr-8	Nuclear receptor	zf-C4	pTH9108	PBM	CEPD	PBM	Narasimhan	2015	25905672	22986	165	157	0.0072	1.03901e-37	FALSE	0.423529
M00605_2.00	atf-8	bZIP	bZIP_1	pTH9052	PBM	CEPD	PBM	Narasimhan	2015	25905672	8831	62	41	0.007	7.13011e-16	FALSE	0.411765
M00667_2.00	end-1	GATA	GATA	pTH9880	PBM	CEPD	PBM	Narasimhan	2015	25905672	12094	85	75	0.007	3.28112e-21	FALSE	0.411765
M00609_2.00	che-1	C2H2 ZF	zf-C2H2	pTH10015	PBM	CEPD	PBM	Narasimhan	2015	25905672	30256	210	195	0.0069	5.79925e-52	FALSE	0.405882
M00596_2.00	skn-1	bZIP	bZIP_1	pTH9913	PBM	CEPD	PBM	Narasimhan	2015	25905672	22197	144	101	0.0065	1.02329e-42	FALSE	0.382353
M00602_2.00	zip-7	bZIP	bZIP_1	pTH9391	PBM	CEPD	PBM	Narasimhan	2015	25905672	7352	48	35	0.0065	6.33069e-15	FALSE	0.382353
M00703_2.00	nhr-218	Nuclear receptor	zf-C4	pTH10714	PBM	CEPD	PBM	Narasimhan	2015	25905672	17445	114	103	0.0065	1.90444e-33	FALSE	0.382353
M00703_2.00	nhr-142	Nuclear receptor	zf-C4	pTH10714	PBM	CEPD	PBM	Narasimhan	2015	25905672	17445	114	103	0.0065	1.90444e-33	FALSE	0.382353
M00703_2.00	nhr-213	Nuclear receptor	zf-C4	pTH10714	PBM	CEPD	PBM	Narasimhan	2015	25905672	17445	114	103	0.0065	1.90444e-33	FALSE	0.382353
M00703_2.00	nhr-170	Nuclear receptor	zf-C4	pTH10714	PBM	CEPD	PBM	Narasimhan	2015	25905672	17445	114	103	0.0065	1.90444e-33	FALSE	0.382353
M00703_2.00	nhr-54	Nuclear receptor	zf-C4	pTH10714	PBM	CEPD	PBM	Narasimhan	2015	25905672	17445	114	103	0.0065	1.90444e-33	FALSE	0.382353
M00703_2.00	nhr-102	Nuclear receptor	zf-C4	pTH10714	PBM	CEPD	PBM	Narasimhan	2015	25905672	17445	114	103	0.0065	1.90444e-33	FALSE	0.382353
M00704_2.00	nhr-204	Nuclear receptor	zf-C4	pTH10028	PBM	CEPD	PBM	Narasimhan	2015	25905672	22818	147	115	0.0064	2.93003e-44	FALSE	0.376471
M00710_2.00	egl-13	Sox	HMG_box	pTH9125	PBM	CEPD	PBM	Narasimhan	2015	25905672	18050	116	112	0.0064	1.82051e-35	FALSE	0.376471
M00656_2.00	dmd-4	DM	DM	pTH10640	PBM	CEPD	PBM	Narasimhan	2015	25905672	11979	75	67	0.0063	7.50872e-25	FALSE	0.370588
M00643_2.00	M03D4.4	C2H2 ZF	zf-C2H2	pTH10027	PBM	CEPD	PBM	Narasimhan	2015	25905672	13973	87	69	0.0062	6.73401e-29	FALSE	0.364706
M00653_2.00	mab-3	DM	DM	pTH8998	PBM	CEPD	PBM	Narasimhan	2015	25905672	25427	157	153	0.0062	4.21884e-52	FALSE	0.364706
M00665_2.00	lin-31	Forkhead	Forkhead	pTH9116	PBM	CEPD	PBM	Narasimhan	2015	25905672	14723	91	84	0.0062	1.13117e-30	FALSE	0.364706
M00592_2.00	atf-2	bZIP	bZIP_1	pTH9711	PBM	CEPD	PBM	Narasimhan	2015	25905672	16152	93	60	0.0058	9.67494e-37	FALSE	0.341176
M00687_2.00	nhr-88	Nuclear receptor	zf-C4	pTH9163	PBM	CEPD	PBM	Narasimhan	2015	25905672	21131	123	99	0.0058	4.78662e-47	FALSE	0.341176
M00687_2.00	nhr-3	Nuclear receptor	zf-C4	pTH9163	PBM	CEPD	PBM	Narasimhan	2015	25905672	21131	123	99	0.0058	4.78662e-47	FALSE	0.341176
M00591_2.00	Y48G1C.6	Brinker	BrkDBD	pTH10769	PBM	CEPD	PBM	Narasimhan	2015	25905672	23312	125	119	0.0054	5.616e-57	FALSE	0.317647
M00604_2.00	cebp-1	bZIP	bZIP_1	pTH9901	PBM	CEPD	PBM	Narasimhan	2015	25905672	17743	96	84	0.0054	2.8398e-43	FALSE	0.317647
M00603_2.00	crh-2	bZIP	bZIP_1	pTH9879	PBM	CEPD	PBM	Narasimhan	2015	25905672	35732	186	140	0.0052	2.17794e-89	FALSE	0.305882
M00680_2.00	eyg-1	Homeodomain,Paired box	Homeobox,PAX	pTH10787	PBM	CEPD	PBM	Narasimhan	2015	25905672	13099	68	64	0.0052	8.29012e-34	FALSE	0.305882
M00681_2.00	ceh-18	Homeodomain,POU	Homeobox,Pou	pTH9885	PBM	CEPD	PBM	Narasimhan	2015	25905672	12926	67	59	0.0052	2.40802e-33	FALSE	0.305882
M00666_2.00	elt-6	GATA	GATA	pTH10707	PBM	CEPD	PBM	Narasimhan	2015	25905672	13437	68	66	0.0051	1.50465e-35	FALSE	0.3
M00666_2.00	egl-18	GATA	GATA	pTH10707	PBM	CEPD	PBM	Narasimhan	2015	25905672	13437	68	66	0.0051	1.50465e-35	FALSE	0.3
M00696_2.00	nhr-122	Nuclear receptor	zf-C4	pTH9326	PBM	CEPD	PBM	Narasimhan	2015	25905672	24399	122	101	0.005	3.46955e-64	FALSE	0.294118
M00696_2.00	nhr-104	Nuclear receptor	zf-C4	pTH9326	PBM	CEPD	PBM	Narasimhan	2015	25905672	24399	122	101	0.005	3.46955e-64	FALSE	0.294118
M00713_2.00	tbx-33	T-box	T-box	pTH10788	PBM	CEPD	PBM	Narasimhan	2015	25905672	29209	147	137	0.005	5.95535e-76	FALSE	0.294118
M00588_2.00	hlh-12	bHLH	HLH	pTH10656	PBM	CEPD	PBM	Narasimhan	2015	25905672	28569	133	100	0.0047	2.25953e-80	FALSE	0.276471
M00670_2.00	elt-7	GATA	GATA	pTH9877	PBM	CEPD	PBM	Narasimhan	2015	25905672	15148	71	70	0.0047	5.90074e-43	FALSE	0.276471
M00671_2.00	ceh-23	Homeodomain	Homeobox	pTH9478	PBM	CEPD	PBM	Narasimhan	2015	25905672	7851	37	38	0.0047	8.44802e-23	FALSE	0.276471
M00676_2.00	ceh-58	Homeodomain	Homeobox	pTH9923	PBM	CEPD	PBM	Narasimhan	2015	25905672	9164	43	38	0.0047	1.64924e-26	FALSE	0.276471
M00668_2.00	end-3	GATA	GATA	pTH9073	PBM	CEPD	PBM	Narasimhan	2015	25905672	11880	52	43	0.0044	3.22358e-36	FALSE	0.258824
M00686_2.00	nhr-101	Nuclear receptor	zf-C4	pTH9322	PBM	CEPD	PBM	Narasimhan	2015	25905672	15249	65	39	0.0043	4.72797e-47	FALSE	0.252941
M00686_2.00	nhr-68	Nuclear receptor	zf-C4	pTH9322	PBM	CEPD	PBM	Narasimhan	2015	25905672	15249	65	39	0.0043	4.72797e-47	FALSE	0.252941
M00686_2.00	nhr-1	Nuclear receptor	zf-C4	pTH9322	PBM	CEPD	PBM	Narasimhan	2015	25905672	15249	65	39	0.0043	4.72797e-47	FALSE	0.252941
M00686_2.00	nhr-40	Nuclear receptor	zf-C4	pTH9322	PBM	CEPD	PBM	Narasimhan	2015	25905672	15249	65	39	0.0043	4.72797e-47	FALSE	0.252941
M00686_2.00	nhr-10	Nuclear receptor	zf-C4	pTH9322	PBM	CEPD	PBM	Narasimhan	2015	25905672	15249	65	39	0.0043	4.72797e-47	FALSE	0.252941
M00686_2.00	nhr-47	Nuclear receptor	zf-C4	pTH9322	PBM	CEPD	PBM	Narasimhan	2015	25905672	15249	65	39	0.0043	4.72797e-47	FALSE	0.252941
M00686_2.00	nhr-17	Nuclear receptor	zf-C4	pTH9322	PBM	CEPD	PBM	Narasimhan	2015	25905672	15249	65	39	0.0043	4.72797e-47	FALSE	0.252941
M10574_2.00	daf-16	Forkhead	Forkhead	N$DAF16_01	Transfac	Transfac	Transfac	Matys	2006	16381825	16045	68	64	0.0042	1.09014e-49	FALSE	0.247059
M00711_2.00	gei-3	Sox	HMG_box	pTH10038	PBM	CEPD	PBM	Narasimhan	2015	25905672	18690	75	75	0.004	2.58541e-60	FALSE	0.235294
M00636_2.00	ztf-9	C2H2 ZF	zf-C2H2	pTH10721	PBM	CEPD	PBM	Narasimhan	2015	25905672	16180	59	56	0.0036	3.04075e-56	FALSE	0.211765
M00684_2.00	unc-120	MADS box	SRF-TF	pTH10822	PBM	CEPD	PBM	Narasimhan	2015	25905672	8637	31	25	0.0036	6.69475e-31	FALSE	0.211765
M00597_2.00	xbp-1	bZIP	bZIP_1	pTH10030	PBM	CEPD	PBM	Narasimhan	2015	25905672	18128	61	64	0.0034	1.90447e-66	FALSE	0.2
M00642_2.00	snai-1	C2H2 ZF	zf-C2H2	pTH10802	PBM	CEPD	PBM	Narasimhan	2015	25905672	6684	20	20	0.003	3.64503e-27	FALSE	0.176471
M00608_2.00	ces-1	C2H2 ZF	zf-C2H2	pTH9158	PBM	CEPD	PBM	Narasimhan	2015	25905672	6835	18	18	0.0026	1.16545e-29	FALSE	0.152941
M00599_2.00	2019-06-01	bZIP	bZIP_1	pTH9928	PBM	CEPD	PBM	Narasimhan	2015	25905672	13500	24	23	0.0018	1.04921e-67	FALSE	0.105882
M00607_2.00	hpo-39	bZIP	bZIP_1	pTH10624	PBM	CEPD	PBM	Narasimhan	2015	25905672	1	0	0	0	1	FALSE	0
M00661_2.00	dmd-9	DM	DM	pTH8999	PBM	CEPD	PBM	Narasimhan	2015	25905672	1	0	0	0	1	FALSE	0
