# Supplementary material for: Diversification of the Caenorhabditis heat shock response by Helitron transposable elements
Source: eLife. 2019 Dec 11;8:e51139. doi: 10.7554/eLife.51139 (PMC6927752; doi:10.7554/eLife.51139)
Supplement: Supplementary file 2. — RNA-seq results showing fold change in gene expression of C. elegans subjected to heat shock at 34°C versus control animals at 20°C for 30 min. [file elife-51139-supp2.xlsx]

## Sheet: Supplemental.Table.2_N2.express
	WormBase.ID	BaseMean	log2(FC)	StdErr	Wald-Stats	P-value	P-adj	chrom	start	end	strand	gene.name
1	WBGene00000001	578.979	-0.126587	0.11376	-1.11276	0.265813	0.40514	chrI	5107833	5110183	+	aap-1
2	WBGene00000002	453.963	-0.738115	0.147881	-4.99129	5.99787e-07	6.05656e-06	chrIV	9598986	9601695	-	aat-1
3	WBGene00000003	990.027	0.102749	0.121952	0.842538	0.399487	0.547239	chrV	9244402	9246360	-	aat-2
4	WBGene00000004	816.036	-0.62906	0.115199	-5.46064	4.74433e-08	5.96044e-07	chrX	2552436	2557726	+	aat-3
5	WBGene00000005	180.622	-0.0817389	0.195069	-0.419025	0.675198	0.782654	chrIV	6272529	6275713	-	aat-4
6	WBGene00000006	1857.36	-0.274288	0.0753574	-3.63982	0.000272828	0.00139017	chrI	2571782	2576020	-	aat-5
7	WBGene00000007	839.315	-0.589588	0.12735	-4.62968	3.66234e-06	3.05759e-05	chrV	11466844	11470663	-	aat-6
8	WBGene00000008	163.692	0.483253	0.176724	2.7345	0.00624751	0.0205221	chrII	1386888	1391567	+	aat-7
9	WBGene00000009	22.1831	0.587867	0.337507	1.74179	0.0815451	0.166601	chrIV	3862129	3865042	-	aat-8
11	WBGene00000010	408.344	0.0374986	0.125251	0.299387	0.764645	0.847559	chrI	11388689	11396660	-	aat-9
12	WBGene00000012	4.94401	0.0637109	0.401454	0.1587	0.873905	0.921318	chrI	3886111	3887080	-	abf-1
13	WBGene00000013	7.77333	0.175353	0.404946	0.433027	0.664995	0.774625	chrI	3885548	3885905	-	abf-2
15	WBGene00000014	0.39384	0.0142055	0.170851	0.083145	0.933736	NA	chrV	15817410	15817846	-	abf-3
16	WBGene00000015	32.7567	-0.0677571	0.393675	-0.172114	0.863348	0.914089	chrV	20557945	20558379	-	abf-4
17	WBGene00000016	633.376	-0.208895	0.172646	-1.20996	0.226293	0.358859	chrX	12792727	12793386	+	abf-5
18	WBGene00000017	461.967	-1.17478	0.160171	-7.33455	2.22474e-13	6.61879e-12	chrX	12794118	12794870	+	abf-6
19	WBGene00000018	1935.51	-0.463195	0.0804643	-5.75652	8.58636e-09	1.23404e-07	chrX	10605832	10624185	-	abl-1
20	WBGene00000019	30.4205	2.38644	0.346578	6.88573	5.74926e-12	1.39657e-10	chrIV	10206189	10214911	-	abt-1
21	WBGene00000020	2680.4	-0.247371	0.0718678	-3.44202	0.000577382	0.00266272	chrI	2255923	2272866	-	abt-2
22	WBGene00000022	3705.68	0.225162	0.124582	1.80734	0.0707096	0.148739	chrV	323774	330725	-	abt-4
23	WBGene00000023	26.6764	0.681108	0.322985	2.10879	0.0349627	0.0845353	chrI	12011195	12018668	+	abt-5
24	WBGene00000024	27.9691	0.671334	0.362206	1.85346	0.0638166	0.137372	chrV	10380340	10381826	-	abu-1
25	WBGene00000025	0.673452	-0.0653227	0.198837	-0.328524	0.742516	NA	chrX	1408836	1410652	-	abu-2
26	WBGene00000027	3.97655	0.625578	0.390864	1.6005	0.109487	0.208442	chrV	2274842	2275977	+	abu-4
27	WBGene00000028	0.34659	0.0847408	0.155136	0.546234	0.584905	NA	chrIV	15590697	15591772	+	abu-5
28	WBGene00000029	0.597438	0.0156032	0.193393	0.0806817	0.935695	NA	chrV	5160671	5161892	-	abu-6
29	WBGene00000030	2.2921	0.216064	0.300006	0.720199	0.471402	0.614347	chrV	5163396	5164759	-	abu-7
30	WBGene00000031	32.9928	0.723329	0.319507	2.26389	0.0235808	0.0617741	chrV	5163269	5194608	-	abu-8
31	WBGene00000032	6.62258	0.429174	0.398213	1.07775	0.281145	0.422796	chrX	8322111	8323418	+	abu-9
32	WBGene00000033	99.8122	1.41933	0.263709	5.38219	7.35835e-08	8.90756e-07	chrX	3798179	3799741	+	abu-10
33	WBGene00000034	30.4363	0.924312	0.320191	2.88675	0.00389245	0.0137107	chrII	192531	194558	-	abu-11
34	WBGene00000035	753.131	-0.26577	0.0957909	-2.77448	0.00552903	0.0184844	chrX	16367229	16373789	+	ace-1
35	WBGene00000036	2389.62	-0.632394	0.0793227	-7.97242	1.55599e-15	5.94628e-14	chrI	3302001	3307587	-	ace-2
36	WBGene00000037	631.485	-0.496017	0.102831	-4.82363	1.4097e-06	1.29819e-05	chrII	14205633	14210214	+	ace-3
37	WBGene00000038	217.28	0.0145146	0.143802	0.100935	0.919602	0.951283	chrII	14198046	14205325	+	ace-4
38	WBGene00000039	3591.31	-0.886144	0.303071	-2.92388	0.00345695	0.0123698	chrX	5092458	5097067	-	acn-1
39	WBGene00000040	23088	-0.140045	0.0698489	-2.00497	0.0449665	0.103686	chrX	11339874	11343568	+	aco-1
40	WBGene00000041	46928.4	0.186788	0.060084	3.10879	0.00187857	0.00735918	chrIII	7973717	7977355	+	aco-2
41	WBGene00000042	178.394	-0.423389	0.178116	-2.37705	0.0174519	0.0483095	chrX	6702463	6709142	+	acr-2
42	WBGene00000043	43.6695	-0.220359	0.272585	-0.808405	0.418858	0.566006	chrX	6709538	6712925	+	acr-3
43	WBGene00000044	93.203	-0.083579	0.211839	-0.39454	0.693182	0.795503	chrIII	6509699	6514768	-	acr-5
44	WBGene00000045	47.1302	0.851489	0.314683	2.70586	0.00681274	0.0220263	chrI	4359207	4362548	+	acr-6
45	WBGene00000046	121.007	0.25208	0.185866	1.35624	0.175023	0.296526	chrII	7845662	7849797	-	acr-7
46	WBGene00000047	461.053	-0.0595126	0.116299	-0.511721	0.608846	0.730256	chrX	10412725	10416630	+	acr-8
47	WBGene00000048	133.929	-0.930556	0.190846	-4.87595	1.08286e-06	1.0249e-05	chrX	13642348	13646898	-	acr-9
48	WBGene00000049	23.9118	0.125125	0.339385	0.368682	0.712365	0.808967	chrX	4022273	4025584	+	acr-10
49	WBGene00000050	82.1241	-0.165315	0.210522	-0.78526	0.432301	0.578791	chrI	6621687	6624894	-	acr-11
50	WBGene00000051	250.946	-0.574609	0.159164	-3.61017	0.000306	0.00153521	chrX	13532871	13536433	+	acr-12
51	WBGene00000053	100.363	-0.31596	0.206283	-1.53169	0.1256	0.231775	chrII	8174845	8177195	-	acr-14
52	WBGene00000054	232.839	-1.20571	0.156227	-7.71768	1.18471e-14	4.12997e-13	chrV	8552695	8555388	+	acr-15
53	WBGene00000055	298.654	-0.247045	0.160119	-1.54289	0.122858	0.227851	chrV	8561216	8564345	+	acr-16
54	WBGene00000056	84.6806	-0.0829727	0.234057	-0.354498	0.722965	0.816571	chrV	2608656	2615247	+	acr-17
55	WBGene00000057	51.282	-0.717511	0.270343	-2.65408	0.00795259	0.0249991	chrV	15551155	15559147	-	acr-18
56	WBGene00000058	192.059	-0.143969	0.166467	-0.864845	0.387124	0.534714	chrI	9031274	9036695	-	acr-19
57	WBGene00000059	127.216	-0.56557	0.19217	-2.94307	0.00324973	0.0117526	chrII	14373831	14377890	-	acr-20
58	WBGene00000060	76.2592	-0.30312	0.216847	-1.39785	0.162158	0.280675	chrIII	6583461	6585617	+	acr-21
60	WBGene00000061	179.901	0.0437657	0.157285	0.278257	0.780815	0.858777	chrX	7503823	7506633	-	lgc-11
61	WBGene00000062	143.449	-0.586406	0.219635	-2.66991	0.00758711	0.0240572	chrV	3651686	3659499	-	acr-23
62	WBGene00000063	120592	0.331769	0.0910813	3.64256	0.000269936	0.00137889	chrV	11079167	11082497	+	act-1
63	WBGene00000064	8471.03	-0.073697	0.0916479	-0.804132	0.421321	0.568284	chrV	11076723	11078168	-	act-2
64	WBGene00000065	65923.9	0.378604	0.0788056	4.80428	1.55309e-06	1.41357e-05	chrV	11071690	11074498	-	act-3
65	WBGene00000066	59607.9	0.420676	0.0821852	5.11863	3.07755e-07	3.30497e-06	chrX	4960553	4964416	+	act-4
66	WBGene00000067	59905.2	0.101812	0.0699035	1.45646	0.145265	0.259036	chrIII	13604339	13606067	-	act-5
67	WBGene00000068	2121.15	-0.121916	0.0940394	-1.29644	0.194824	0.320993	chrIII	4722126	4730919	+	acy-1
68	WBGene00000069	252.681	-0.536984	0.146429	-3.66721	0.000245216	0.00127508	chrV	5976029	5981513	+	acy-2
69	WBGene00000070	2558.65	-0.496885	0.0837526	-5.93277	2.97867e-09	4.67452e-08	chrIII	3774896	3786640	-	acy-3
70	WBGene00000071	498.287	-0.338998	0.108234	-3.13208	0.00173575	0.00687486	chrV	5624727	5630892	-	acy-4
71	WBGene00000072	900.251	0.0665651	0.0951129	0.699854	0.484019	0.625288	chrX	4854069	4860036	-	add-1
72	WBGene00000073	607.925	-0.0220712	0.105548	-0.20911	0.834362	0.89523	chrV	12009537	12013605	-	add-2
73	WBGene00000074	868.956	-0.353324	0.105361	-3.35345	0.000798096	0.00352656	chrX	13687973	13695771	+	adm-2
74	WBGene00000075	478.727	-0.380395	0.106381	-3.57578	0.000349183	0.00171928	chrX	7795046	7798287	-	adm-4
75	WBGene00000079	3792.58	-0.27014	0.101303	-2.66666	0.00766096	0.0242493	chrI	7773180	7777652	+	adr-1
76	WBGene00000080	869.115	-0.313293	0.091377	-3.42858	0.000606752	0.00278341	chrIII	7230964	7232882	-	adr-2
77	WBGene00000081	10998.9	0.229666	0.0748949	3.06651	0.00216572	0.00831118	chrIII	295651	298556	-	ads-1
78	WBGene00000082	189.78	1.06733	0.220448	4.84166	1.28758e-06	1.19817e-05	chrX	12678832	12689279	+	adt-1
79	WBGene00000083	7206.75	-0.248171	0.0624257	-3.97546	7.0242e-05	0.00042685	chrX	7585587	7595414	+	adt-2
80	WBGene00000084	516.373	-0.0472891	0.105086	-0.450002	0.652709	0.765278	chrI	7602307	7608245	+	aex-1
81	WBGene00000085	87.3405	-0.436881	0.215398	-2.02825	0.0425351	0.0991058	chrX	9650999	9653116	-	aex-2
82	WBGene00000086	1137.61	-0.156147	0.101724	-1.53501	0.124782	0.230639	chrX	751211	759732	-	aex-3
83	WBGene00000088	878.715	0.194597	0.0993309	1.95908	0.0501036	0.112993	chrI	14850054	14855827	-	aex-5
84	WBGene00000089	391.007	-0.392764	0.117094	-3.35426	0.00079579	0.00351978	chrI	13543079	13545188	-	aex-6
85	WBGene00000090	1015.41	-0.0020756	0.0877252	-0.0236603	0.981124	0.987993	chrII	11519323	11527062	-	age-1
86	WBGene00000092	650.735	-0.424257	0.111677	-3.79897	0.000145297	0.000802826	chrX	5289728	5303512	-	ags-3
87	WBGene00000093	412.844	-0.270217	0.12141	-2.22566	0.026037	0.0668378	chrIV	13368368	13369417	-	agt-1
88	WBGene00000094	143.703	-0.283032	0.173062	-1.63543	0.101958	0.197819	chrII	5371980	5373433	-	agt-2
89	WBGene00000095	883.01	-0.316984	0.0925079	-3.42656	0.000611273	0.00280133	chrI	10193925	10197000	-	aha-1
90	WBGene00000096	46.3087	-0.439019	0.286914	-1.53014	0.125982	0.232283	chrI	9522578	9531130	+	ahr-1
91	WBGene00000097	2811.7	2.70118	0.307017	8.79813	1.39114e-18	7.51831e-17	chrV	14012333	14013644	+	aip-1
92	WBGene00000098	531.301	-0.401736	0.121809	-3.29808	0.00097347	0.00419495	chrV	8221410	8223587	+	air-1
96	WBGene00000099	224.001	-0.21983	0.156334	-1.40615	0.159679	0.2774	chrI	5937477	5938885	+	air-2
97	WBGene00000100	7578.53	0.0147384	0.0781712	0.188539	0.850454	0.906162	chrX	9078945	9113613	+	ajm-1
98	WBGene00000101	2998.79	0.0165574	0.0674205	0.245584	0.806004	0.875708	chrII	7472729	7478959	-	aka-1
99	WBGene00000102	1713.15	-0.710017	0.0863091	-8.22644	1.92862e-16	8.28944e-15	chrV	10248907	10252895	+	akt-1
100	WBGene00000103	1063.06	-0.42101	0.102506	-4.10719	4.00509e-05	0.000259897	chrX	14147700	14152070	+	akt-2
101	WBGene00000105	3541.24	-0.525418	0.077505	-6.77915	1.20888e-11	2.79526e-10	chrX	13949114	13956261	+	alg-1
102	WBGene00000106	2274.7	-0.29949	0.0868277	-3.44924	0.000562168	0.00260373	chrII	873176	879001	+	alg-2
103	WBGene00000107	12219.7	0.0712481	0.0837702	0.850518	0.395037	0.54269	chrIII	5077765	5080665	+	alh-1
104	WBGene00000108	2.64953	0.302271	0.373338	0.809643	0.418146	0.565321	chrV	1644169	1647728	+	alh-2
105	WBGene00000109	7971.76	-0.10132	0.0653235	-1.55105	0.12089	0.22529	chrIV	11022603	11025870	+	alh-3
106	WBGene00000110	6028.99	0.380029	0.109722	3.46356	0.000533081	0.00248413	chrV	6427212	6429927	-	alh-4
107	WBGene00000111	691.246	-0.648963	0.116683	-5.56176	2.67063e-08	3.51472e-07	chrV	1996100	1999581	-	alh-5
108	WBGene00000112	6272.7	0.00127081	0.09389	0.0135351	0.989201	0.993279	chrII	1306240	1310133	-	alh-6
109	WBGene00000113	3151.38	0.0865606	0.0741444	1.16746	0.243025	0.378557	chrII	13485792	13491786	-	alh-7
110	WBGene00000114	50997.5	0.300083	0.0764674	3.92432	8.69749e-05	0.000513773	chrII	11728949	11731226	+	alh-8
111	WBGene00000115	12791.4	0.150644	0.0723443	2.08232	0.0373129	0.0890159	chrIII	5856018	5859186	+	alh-9
112	WBGene00000116	1274.37	0.114127	0.088471	1.28999	0.197054	0.323704	chrX	7140504	7143641	-	alh-10
113	WBGene00000117	1371.35	0.0859341	0.0810659	1.06005	0.289121	0.431167	chrIII	774321	778871	-	alh-11
114	WBGene00000118	4388.27	0.0135551	0.0739652	0.183263	0.854592	0.908187	chrIII	7454012	7455980	+	alh-12
115	WBGene00000120	680.809	-0.00417913	0.109563	-0.0381436	0.969573	0.98109	chrIV	9108931	9109753	+	aly-1
117	WBGene00000121	830.412	0.097702	0.0996043	0.980901	0.326642	0.47281	chrIV	9147468	9148579	+	aly-2
118	WBGene00000122	3497.17	0.077381	0.0735519	1.05206	0.292772	0.435014	chrIV	12123155	12124807	+	aly-3
119	WBGene00000123	10469	-0.118537	0.08274	-1.43265	0.151958	0.267632	chrIV	4248020	4258173	+	ama-1
120	WBGene00000133	162.99	0.566043	0.179451	3.1543	0.00160884	0.00644772	chrX	4571448	4573914	+	amt-1
121	WBGene00000134	150.358	1.90756	0.19095	9.98985	1.68838e-23	1.37074e-21	chrIV	13042391	13046858	+	amt-2
122	WBGene00000135	188.492	-0.80223	0.156147	-5.13766	2.78175e-07	3.01032e-06	chrII	8363196	8369159	-	amt-3
123	WBGene00000136	3583.4	-0.270356	0.088114	-3.06825	0.00215314	0.00826813	chrX	4565302	4569393	+	amt-4
125	WBGene00000137	419.236	-0.750078	0.114128	-6.57228	4.95503e-11	1.03681e-09	chrIII	3822403	3826261	+	amx-1
126	WBGene00000138	1292.27	0.457036	0.151754	3.01169	0.00259797	0.00970294	chrI	12759545	12764960	-	amx-2
127	WBGene00000139	180.05	0.323081	0.163676	1.9739	0.0483931	0.109759	chrV	20898840	20903441	-	amx-3
128	WBGene00000140	267177	0.349156	0.0627188	5.56701	2.59146e-08	3.4226e-07	chrI	4318033	4359080	+	anc-1
129	WBGene00000142	1026.96	-0.0040487	0.0883167	-0.045843	0.963435	0.977672	chrV	10127492	10130295	-	aos-1
130	WBGene00000143	445.084	-0.408221	0.111117	-3.67378	0.000238992	0.00124769	chrIII	8080570	8083701	+	apc-2
131	WBGene00000144	77.9443	0.444741	0.22193	2.00396	0.0450739	0.103895	chrV	10425362	10426399	-	apc-10
132	WBGene00000145	170.267	-0.0309212	0.170377	-0.181486	0.855986	0.909192	chrIII	4593769	4594426	-	apc-11
133	WBGene00000146	2734.99	-0.02698	0.0840835	-0.320872	0.748308	0.835789	chrV	11675942	11685268	+	ape-1
134	WBGene00000147	267.167	0.136584	0.132616	1.02992	0.303048	0.446757	chrI	9232071	9233560	-	aph-1
135	WBGene00000148	1004.99	-0.156157	0.0947091	-1.64881	0.0991865	0.193511	chrI	10340997	10345648	+	aph-2
136	WBGene00000149	17355.2	-0.143377	0.0647122	-2.21561	0.0267181	0.0682648	chrX	5112422	5116866	-	apl-1
137	WBGene00000150	1885.84	0.0664653	0.0814537	0.815989	0.414506	0.561818	chrI	5342180	5344724	-	apm-1
138	WBGene00000151	422.091	0.0657157	0.12203	0.538522	0.590217	0.71595	chrII	8047564	8049105	+	apn-1
139	WBGene00000155	3755.21	-0.190435	0.0685928	-2.77631	0.00549804	0.0184044	chrI	4964667	4967089	-	app-1
140	WBGene00000156	1773.5	-0.146608	0.0917339	-1.59818	0.110002	0.20927	chrI	8050043	8055489	+	2019-04-01
141	WBGene00000157	636.21	-0.181159	0.099207	-1.82607	0.0678403	0.144081	chrX	4458272	4459264	+	aps-2
142	WBGene00000158	3559.75	-0.137263	0.0649984	-2.11179	0.0347049	0.0840564	chrI	14406028	14417942	+	apg-1
143	WBGene00000159	899.401	-0.270485	0.0990768	-2.73006	0.00633235	0.0207077	chrV	6017970	6018886	+	aps-1
144	WBGene00000160	3969.29	-0.21235	0.0691785	-3.06959	0.00214352	0.00823809	chrIII	2583953	2597034	-	apb-1
145	WBGene00000161	4094.49	-0.172158	0.0740959	-2.32344	0.0201553	0.0544156	chrX	9336819	9342970	+	apa-2
146	WBGene00000162	1890.14	-0.174359	0.0779401	-2.23709	0.0252803	0.0653175	chrII	3532527	3546431	-	apd-3
147	WBGene00000163	2194.02	0.0203657	0.0785597	0.259238	0.795451	0.868894	chrI	7853750	7857850	+	apb-3
148	WBGene00000164	634.434	-0.737253	0.126536	-5.82644	5.66213e-09	8.41579e-08	chrX	954839	957762	+	apm-3
149	WBGene00000165	1432.39	-0.272512	0.078844	-3.45634	0.000547557	0.00254445	chrI	1154511	1156020	-	aps-3
150	WBGene00000166	234.842	-0.708794	0.158738	-4.46517	8.00045e-06	6.16903e-05	chrX	11068527	11071925	+	apt-9
151	WBGene00000168	331.989	-0.0853895	0.149757	-0.570189	0.56855	0.698572	chrV	3210189	3223218	+	apx-1
152	WBGene00000169	2127.7	0.240563	0.111522	2.15709	0.0309984	0.0768419	chrII	7235834	7238349	-	aqp-1
153	WBGene00000170	11051.1	0.072098	0.0645524	1.11689	0.26404	0.403347	chrII	9258913	9261994	-	aqp-2
154	WBGene00000171	0.669979	0.132873	0.22516	0.590128	0.555105	NA	chrIV	10961355	10966459	-	aqp-3
155	WBGene00000172	1532.95	0.0685852	0.0782524	0.876461	0.38078	0.527947	chrV	9737556	9739740	+	aqp-4
156	WBGene00000173	35.6329	1.01051	0.298269	3.3879	0.000704299	0.00316883	chrV	10491743	10493268	+	aqp-5
157	WBGene00000174	38.2981	0.365218	0.305107	1.19702	0.2313	0.364805	chrV	10648446	10651952	+	aqp-6
158	WBGene00000175	12282.6	0.188275	0.0714257	2.63595	0.00839016	0.026163	chrX	3025505	3026976	+	aqp-7
159	WBGene00000176	4846.09	0.350731	0.12264	2.85985	0.00423841	0.0147117	chrX	4702442	4704970	-	aqp-8
160	WBGene00000177	406.899	0.129944	0.119802	1.08466	0.278073	0.419313	chrI	9605896	9609025	+	aqp-9
161	WBGene00000178	2206.65	0.0866996	0.0812213	1.06745	0.285769	0.4276	chrII	9768357	9769847	-	aqp-10
162	WBGene00000179	2098.39	-0.011053	0.09524	-0.116055	0.907609	0.94356	chrIII	13673280	13674746	+	aqp-11
163	WBGene00000180	980.596	-0.0173754	0.0905857	-0.191812	0.84789	0.904643	chrII	9674978	9677210	+	arc-1
164	WBGene00000181	4349.2	0.289228	0.0631083	4.58304	4.58272e-06	3.7355e-05	chrIV	11131279	11133785	+	ard-1
165	WBGene00000182	4726.17	-0.0196714	0.0729927	-0.269498	0.787546	0.863564	chrIII	5714861	5717585	+	arf-1.2
166	WBGene00000183	5688.13	-0.25184	0.0735811	-3.42261	0.00062022	0.00283522	chrIV	7982526	7983919	+	arf-3
167	WBGene00000184	552.658	-0.0494937	0.118734	-0.416847	0.67679	0.783803	chrIV	16947120	16949734	+	arf-6
168	WBGene00000185	3.12645	-0.20061	0.369036	-0.543604	0.586714	0.713074	chrX	1786907	1788405	+	arg-1
169	WBGene00000186	1522.39	-0.152316	0.0862922	-1.76512	0.0775431	0.160163	chrIV	12622093	12631022	-	ark-1
170	WBGene00000187	852.785	-0.0418699	0.0972578	-0.430504	0.666829	0.776204	chrII	8581945	8583080	+	arl-1
171	WBGene00000188	288.383	-0.00487697	0.187952	-0.0259479	0.979299	0.986934	chrII	14606472	14608342	+	arl-3
172	WBGene00000189	203.531	0.304392	0.146544	2.07715	0.037788	0.089938	chrIII	9823242	9824132	+	arl-5
173	WBGene00000190	109.982	0.990941	0.205047	4.83275	1.34661e-06	1.24676e-05	chrIV	7634786	7635710	+	arf-1.1
174	WBGene00000192	726.524	-0.303233	0.0929979	-3.26065	0.00111158	0.00468835	chrIV	14798149	14799229	+	arl-8
175	WBGene00000193	30.6539	-0.429864	0.311982	-1.37785	0.16825	0.288476	chrIII	4813309	4814814	-	arl-6
176	WBGene00000195	729.874	-0.359738	0.102681	-3.50345	0.000459275	0.00217854	chrX	950782	954233	+	arr-1
177	WBGene00000196	1003.2	0.0121293	0.0905203	0.133996	0.893406	0.93483	chrII	11460215	11464129	-	aars-1
178	WBGene00000197	10495.6	0.0833481	0.0717653	1.1614	0.24548	0.381211	chrI	3983171	3986915	+	aars-2
179	WBGene00000198	5180.64	-0.0463078	0.0619625	-0.747351	0.454852	0.599825	chrII	6970668	6972235	-	art-1
180	WBGene00000199	2485.88	0.107736	0.0717001	1.5026	0.132943	0.242024	chrI	2883546	2893718	-	arx-1
181	WBGene00000200	2248.72	-0.3272	0.0743162	-4.4028	1.06861e-05	7.99029e-05	chrV	10335443	10338355	-	arx-2
182	WBGene00000201	2308.82	0.12457	0.0717731	1.7356	0.0826338	0.168393	chrIII	12052424	12058458	-	arx-3
183	WBGene00000202	767.847	0.426305	0.093473	4.56073	5.0977e-06	4.11487e-05	chrIII	860198	861324	+	exos-4.2
184	WBGene00000203	970.93	-0.0202134	0.084051	-0.24049	0.809951	0.878324	chrIII	12816789	12818100	-	arx-5
185	WBGene00000204	746.862	0.0273784	0.0979628	0.279477	0.779879	0.858138	chrIII	4878658	4879643	+	arx-6
186	WBGene00000205	653.32	-0.0295717	0.0947413	-0.312131	0.754941	0.840475	chrI	3069325	3070150	-	arx-7
187	WBGene00000206	1399.92	-0.231363	0.078341	-2.95328	0.0031442	0.0114117	chrIII	4594543	4595944	-	asb-1
188	WBGene00000207	33827.9	0.258166	0.0568024	4.54499	5.49373e-06	4.3861e-05	chrX	4469743	4471476	+	asb-2
189	WBGene00000208	1025.67	0.32847	0.107562	3.05377	0.00225985	0.00861775	chrII	15039404	15048904	+	trip-4
190	WBGene00000209	3433.75	0.108448	0.0848922	1.27748	0.201432	0.328769	chrI	8692946	8693468	+	asg-1
191	WBGene00000210	9757.16	0.345903	0.0659716	5.24321	1.57807e-07	1.79718e-06	chrX	6841258	6842129	+	asg-2
192	WBGene00000211	363.462	0.503825	0.163478	3.08191	0.00205675	0.00794475	chrII	6910031	6912697	+	asm-1
193	WBGene00000212	927.421	0.0417016	0.100494	0.414964	0.678168	0.784702	chrX	11321079	11324251	-	asm-2
194	WBGene00000213	161.396	-0.590639	0.216869	-2.72348	0.0064598	0.0210566	chrIV	520214	523809	-	asm-3
195	WBGene00000214	147449	0.00565386	0.0737244	0.0766891	0.938871	0.963166	chrV	19049461	19050825	-	asp-1
196	WBGene00000215	25017.9	-0.198254	0.0689582	-2.87499	0.00404044	0.0141582	chrV	9203077	9204734	+	asp-2
197	WBGene00000216	60538.3	0.0199462	0.0766295	0.260294	0.794637	0.86816	chrX	6791064	6792715	+	asp-3
198	WBGene00000217	9560.5	0.0871273	0.0643014	1.35498	0.175423	0.29696	chrX	13218977	13221462	-	asp-4
199	WBGene00000218	38668.6	-0.0254524	0.0686285	-0.370873	0.710732	0.808201	chrV	8272375	8274046	+	asp-5
200	WBGene00000219	63838.3	0.122609	0.0837748	1.46355	0.143317	0.256388	chrV	8267511	8268937	-	asp-6
201	WBGene00000220	133.9	-0.251853	0.403182	-0.624662	0.532193	0.669385	chrII	8751986	8753939	+	atf-2
202	WBGene00000221	980.912	-0.392867	0.0981735	-4.00176	6.28733e-05	0.000387747	chrX	14808846	14810849	-	atf-5
203	WBGene00000222	854.753	-0.301064	0.0940729	-3.20033	0.0013727	0.00563614	chrX	12480948	12484904	+	atf-6
204	WBGene00000223	4291.68	0.271132	0.125541	2.1597	0.030796	0.0764749	chrIII	4491627	4499043	-	atf-7
205	WBGene00000224	3456.26	-0.103928	0.0807887	-1.28642	0.198298	0.325075	chrIV	17269342	17272183	+	atgp-1
206	WBGene00000225	43739.4	0.77306	0.0883652	8.74847	2.16267e-18	1.14178e-16	chrII	14640096	14644083	-	atgp-2
207	WBGene00000226	3015.66	-0.48931	0.0696006	-7.03026	2.06153e-12	5.36438e-11	chrV	9634861	9645595	-	atl-1
208	WBGene00000227	1499.18	0.128894	0.115384	1.11708	0.263959	0.403291	chrI	183364	208465	+	atm-1
209	WBGene00000228	19991.9	0.328266	0.0609099	5.38937	7.07055e-08	8.57621e-07	chrV	12478413	12484442	+	atn-1
210	WBGene00000229	135020	0.268431	0.0601576	4.46212	8.11512e-06	6.24953e-05	chrIII	5228417	5230536	+	atp-2
211	WBGene00000230	23384.8	0.28487	0.0586048	4.86086	1.16875e-06	1.09786e-05	chrI	5428469	5429908	-	atp-3
212	WBGene00000231	4072.58	-0.301097	0.0894818	-3.3649	0.00076571	0.00340405	chrIII	10461389	10468051	+	atx-2
213	WBGene00000232	545.434	-0.240618	0.114898	-2.0942	0.0362423	0.0870301	chrI	5967250	5973320	-	avr-14
214	WBGene00000233	988.632	-0.0997834	0.106698	-0.935193	0.349689	0.496467	chrV	13498786	13511718	-	avr-15
215	WBGene00000235	1457.62	0.177264	0.0930101	1.90586	0.056668	0.124973	chrIII	9467464	9468058	+	baf-1
216	WBGene00000236	798.98	0.584274	0.129934	4.4967	6.90151e-06	5.383e-05	chrI	6563629	6564451	-	bag-1
217	WBGene00000237	1683.9	-0.22784	0.0838809	-2.71624	0.00660283	0.0214577	chrI	2949600	2957910	-	bam-2
218	WBGene00000238	965.643	-0.447457	0.0872345	-5.12936	2.90736e-07	3.13511e-06	chrX	7166005	7170625	-	bar-1
219	WBGene00000239	1386.66	-0.263213	0.0875305	-3.0071	0.00263755	0.00982665	chrIII	5612274	5614700	+	bas-1
220	WBGene00000240	4631.39	-0.0578092	0.0981285	-0.589118	0.555782	0.688024	chrII	8762668	8766922	-	pah-1
221	WBGene00000241	67.8103	-0.76304	0.231735	-3.29273	0.000992209	0.00426463	chrI	14371142	14376025	-	bbs-1
222	WBGene00000242	66.7885	-0.845523	0.245789	-3.44003	0.000581641	0.00268033	chrIV	7934097	7937746	+	bbs-2
223	WBGene00000244	124.663	-0.414973	0.17995	-2.30605	0.0211079	0.056503	chrV	6762476	6765072	-	bbs-8
224	WBGene00000245	1237.76	-0.54166	0.0963013	-5.62464	1.85893e-08	2.52094e-07	chrX	6201875	6204922	-	bca-1
225	WBGene00000246	408.579	0.0173428	0.148643	0.116674	0.907118	0.943174	chrIV	11086074	11092552	-	bcc-1
226	WBGene00000247	523.156	-0.145972	0.135973	-1.07354	0.28303	0.42481	chrIV	5661141	5664425	-	bec-1
227	WBGene00000248	3209.01	0.0845493	0.0686094	1.23233	0.217826	0.349038	chrIII	3537688	3541628	-	ben-1
228	WBGene00000249	306.978	-0.296958	0.131011	-2.26666	0.023411	0.0614616	chrV	11644760	11645370	+	bir-1
229	WBGene00000250	59.45	0.212874	0.245858	0.865844	0.386576	0.534159	chrV	13568850	13570030	+	bir-2
230	WBGene00000251	54.2631	0.389079	0.317196	1.22662	0.219966	0.351265	chrII	10708765	10712156	+	bli-1
231	WBGene00000252	17.3144	-0.0121302	0.356518	-0.0340241	0.972858	0.983083	chrII	5651394	5652449	-	bli-2
232	WBGene00000253	2445.38	-0.501006	0.0754775	-6.63782	3.18366e-11	6.85801e-10	chrI	146486	154850	-	bli-3
233	WBGene00000254	5576.88	-0.350106	0.0756476	-4.62811	3.69017e-06	3.0752e-05	chrI	6342231	6356678	+	bli-4
234	WBGene00000255	24.9831	0.421311	0.342081	1.23161	0.218094	0.349375	chrIII	13427642	13429713	-	bli-5
235	WBGene00000256	19.0652	1.27243	0.382856	3.32352	0.000888888	0.00387156	chrIV	6377065	6378195	+	bli-6
236	WBGene00000257	851.195	-0.200649	0.0964149	-2.0811	0.0374245	0.0891668	chrV	14453305	14456998	-	bmk-1
237	WBGene00000259	912.093	-0.396183	0.107346	-3.69071	0.000223626	0.00117351	chrII	6274115	6279699	+	bpl-1
238	WBGene00000262	173.752	-0.560558	0.166495	-3.36681	0.00076042	0.00338547	chrX	13598449	13599687	+	bra-1
239	WBGene00000263	9165.53	0.11848	0.0623338	1.90073	0.0573368	0.126148	chrIII	909957	910589	-	F23H11.5
240	WBGene00000264	219.109	0.121014	0.155721	0.777121	0.437087	0.583403	chrIII	3853026	3862958	-	brc-1
241	WBGene00000265	218.284	-0.102842	0.151983	-0.676669	0.498616	0.638859	chrIII	6885204	6889523	-	brd-1
242	WBGene00000266	2019.52	-0.143451	0.0738773	-1.94174	0.0521681	0.116641	chrIV	8987130	8990444	+	bre-1
243	WBGene00000267	119.566	0.410162	0.203309	2.01743	0.0436502	0.101149	chrIII	13134014	13139614	-	bre-2
251	WBGene00000268	1198.19	-0.0874469	0.0816023	-1.07162	0.283889	0.425826	chrIII	9469920	9485451	-	bre-3
252	WBGene00000269	328.324	-0.458303	0.121144	-3.78314	0.000154862	0.000851296	chrI	1621346	1628476	-	bre-4
253	WBGene00000270	185.155	-0.496116	0.16549	-2.99785	0.00271889	0.0100844	chrIV	12049862	12051226	-	bre-5
254	WBGene00000271	880.197	-0.0183484	0.095655	-0.191819	0.847884	0.904643	chrII	7305861	7308738	+	brf-1
255	WBGene00000272	71.3525	-0.979868	0.228581	-4.28674	1.81312e-05	0.000128423	chrI	5186926	5188995	+	bro-1
256	WBGene00000273	6706.38	0.328435	0.145146	2.26279	0.0236488	0.0619256	chrIII	12020552	12025325	+	brp-1
257	WBGene00000274	1767.72	-0.0318856	0.0829158	-0.384553	0.700568	0.80028	chrII	13200165	13215701	+	btf-1
258	WBGene00000275	1347.03	-0.186867	0.130844	-1.42817	0.153243	0.269162	chrI	7251941	7255223	+	bub-1
260	WBGene00000276	4116.15	0.201892	0.0781562	2.58318	0.00978931	0.0297144	chrIII	6932001	6935862	+	byn-1
261	WBGene00000277	7039.41	-0.627027	0.0694647	-9.02655	1.7717e-19	1.03069e-17	chrX	12199655	12213049	-	cab-1
262	WBGene00000279	126.944	-0.536332	0.1794	-2.98958	0.00279357	0.0103196	chrIII	5083206	5085289	-	cah-1
263	WBGene00000280	275.569	-0.766984	0.138711	-5.52937	3.21382e-08	4.16656e-07	chrII	7480751	7483109	-	cah-2
264	WBGene00000281	2747.72	0.155004	0.0736117	2.1057	0.0352301	0.0850355	chrX	16487481	16489397	+	cah-3
265	WBGene00000282	4179.93	0.611149	0.115315	5.29985	1.15899e-07	1.35107e-06	chrX	13542574	13544599	+	cah-4
266	WBGene00000283	1223.13	-0.254498	0.109465	-2.32493	0.0200758	0.0542424	chrX	7020033	7023950	+	cah-5
267	WBGene00000284	809.162	-0.291701	0.0993008	-2.93755	0.0033082	0.0119272	chrI	3629471	3631112	+	cah-6
268	WBGene00000285	439.452	-1.13686	0.13306	-8.54399	1.29668e-17	6.47172e-16	chrV	12514875	12517205	-	cal-1
269	WBGene00000286	523.393	-0.859883	0.104619	-8.21918	2.04896e-16	8.74496e-15	chrII	8960714	8961577	+	cal-2
270	WBGene00000287	288.472	-0.00486379	0.139477	-0.0348717	0.972182	0.982625	chrIV	3829546	3835165	-	cal-3
271	WBGene00000288	578.67	-1.10341	0.116301	-9.48751	2.36624e-21	1.61284e-19	chrIV	10521422	10530597	+	cal-4
272	WBGene00000289	2041.85	-0.354847	0.0799447	-4.43865	9.05249e-06	6.90446e-05	chrII	9295918	9310304	-	cam-1
273	WBGene00000292	2265.42	0.00187027	0.069809	0.0267913	0.978626	0.986565	chrIV	7228403	7230223	-	cap-1
274	WBGene00000293	3712.65	0.15403	0.0749292	2.05568	0.0398138	0.0938665	chrII	10869196	10870827	+	cap-2
275	WBGene00000294	2992.76	-0.029308	0.0755845	-0.387752	0.6982	0.798675	chrX	16807461	16813673	-	cas-1
276	WBGene00000295	206.785	-0.248428	0.178571	-1.3912	0.164166	0.283254	chrX	5705719	5710625	-	cat-1
277	WBGene00000296	94.9393	-0.794443	0.212594	-3.73691	0.000186295	0.00099972	chrII	257819	261063	+	cat-2
278	WBGene00000298	2324.85	0.471917	0.0964354	4.8936	9.90079e-07	9.4674e-06	chrV	10564880	10566445	+	cat-4
279	WBGene00000301	113.042	-0.625596	0.197266	-3.17133	0.00151741	0.00613672	chrIV	9772510	9773470	+	cav-1
280	WBGene00000302	100.217	0.811128	0.218562	3.7112	0.000206282	0.00109444	chrV	13557104	13559922	+	cav-2
281	WBGene00000366	12365.5	-0.138717	0.0696197	-1.99249	0.0463168	0.10629	chrIII	9766516	9774825	+	cbp-1
282	WBGene00000367	2825.44	-0.29924	0.0710027	-4.21449	2.50346e-05	0.000170956	chrX	7847682	7875954	-	cca-1
283	WBGene00000368	1617.84	-0.162358	0.0938533	-1.72991	0.083646	0.169925	chrI	3641668	3647009	-	ccb-1
284	WBGene00000369	956.669	-0.0582331	0.0917699	-0.634556	0.525718	0.662982	chrIII	11918828	11920237	-	ccf-1
286	WBGene00000370	5831.97	-0.0322941	0.0655755	-0.492472	0.622386	0.741142	chrIV	15270160	15275835	-	ccg-1
287	WBGene00000371	12406.2	0.246264	0.0612318	4.02182	5.77493e-05	0.000360405	chrI	9788749	9790050	+	cox-5B
288	WBGene00000372	15.4917	0.556136	0.37822	1.4704	0.141453	0.253947	chrII	9803620	9805510	+	cyp-13A7
289	WBGene00000373	1035.29	1.01529	0.113611	8.93656	4.01462e-19	2.28458e-17	chrV	5421018	5423488	-	cyp-14A5
290	WBGene00000375	352.212	-0.134452	0.121242	-1.10895	0.26745	0.406855	chrII	5503966	5506115	+	cyp-44A1
291	WBGene00000376	2328.12	-0.171407	0.0889412	-1.9272	0.053955	0.119844	chrIV	12361542	12371852	+	ccr-4
292	WBGene00000377	19885.9	0.158078	0.0616612	2.56365	0.0103577	0.0311651	chrII	8185443	8187601	+	cct-1
293	WBGene00000378	15742.2	0.190961	0.0719987	2.65229	0.0079948	0.0251145	chrII	8927741	8929820	+	cct-2
294	WBGene00000379	15170.7	0.0886108	0.0702186	1.26193	0.206975	0.335535	chrII	8283667	8285711	+	cct-4
295	WBGene00000380	22854.9	0.395248	0.0802121	4.92754	8.32734e-07	8.09555e-06	chrIII	4499191	4508114	-	cct-5
296	WBGene00000381	14850.1	0.0680541	0.0687549	0.989807	0.322269	0.468142	chrIII	5853532	5855687	-	cct-6
297	WBGene00000382	847.618	-0.0190877	0.0925252	-0.206297	0.836559	0.896831	chrI	4268070	4270287	-	cdc-6
298	WBGene00000383	2207.02	-0.283615	0.0789147	-3.59394	0.00032571	0.00162251	chrII	5589186	5593628	-	cdc-14
316	WBGene00000386	550.818	-0.0790048	0.114373	-0.690765	0.489713	0.630548	chrI	6469386	6471995	-	cdc-25.1
317	WBGene00000387	745.031	-0.13608	0.146865	-0.926563	0.354153	0.50045	chrV	1567076	1585532	+	cdc-25.2
318	WBGene00000388	9.08402	1.63443	0.405601	4.02966	5.58584e-05	0.00034944	chrIII	8916351	8917929	-	cdc-25.3
319	WBGene00000389	2.55012	0.807047	0.35849	2.25124	0.0243703	0.0634873	chrII	10188263	10189469	-	cdc-25.4
320	WBGene00000390	3178.49	0.13827	0.0666201	2.07549	0.0379408	0.0902311	chrII	7616452	7618245	+	cdc-42
321	WBGene00000391	1748.98	1.40693	0.107156	13.1297	2.22441e-39	3.90705e-37	chrX	8208748	8211149	-	cdd-1
322	WBGene00000392	357.26	0.0280484	0.117764	0.238174	0.811746	0.879541	chrIV	7547118	7547893	-	cdd-2
323	WBGene00000393	1166.13	-0.121295	0.0993781	-1.22054	0.222259	0.353999	chrX	6499928	6504613	-	cdf-1
324	WBGene00000395	1784.06	-0.520513	0.0881607	-5.90413	3.54505e-09	5.48328e-08	chrIII	7741326	7754448	-	cdh-3
325	WBGene00000396	8744.6	-0.136759	0.0733957	-1.86331	0.0624192	0.134952	chrIII	4520363	4536991	+	cdh-4
326	WBGene00000397	133.75	-1.0837	0.31685	-3.42023	0.000625691	0.00285452	chrIV	8668941	8676542	+	cdh-5
327	WBGene00000399	6075.97	-0.912157	0.281582	-3.2394	0.00119782	0.00500585	chrII	14843177	14850905	+	cdh-7
328	WBGene00000401	209.751	-0.733389	0.16764	-4.3748	1.21546e-05	8.96724e-05	chrX	16595238	16602238	+	cdh-9
330	WBGene00000402	5787.26	-1.04943	0.277668	-3.77944	0.000157181	0.000863268	chrIV	2436505	2463405	-	cdh-10
331	WBGene00000403	8029.33	-0.46756	0.0815613	-5.73262	9.88902e-09	1.40687e-07	chrII	5945418	5956683	-	casy-1
332	WBGene00000405	582.286	-0.335495	0.107909	-3.10907	0.0018768	0.0073538	chrIII	9747432	9748852	+	cdk-1
333	WBGene00000406	274.111	0.0738657	0.129393	0.570863	0.568092	0.698059	chrX	13515871	13518911	-	cdk-4
334	WBGene00000407	554.347	0.127683	0.127483	1.00157	0.316552	0.461747	chrIII	13464687	13466390	-	cdk-5
335	WBGene00000408	385.926	-0.445314	0.131299	-3.39159	0.000694873	0.0031295	chrI	2281504	2291183	-	cdk-7
336	WBGene00000409	594.197	-0.417026	0.105779	-3.94242	8.06622e-05	0.000481364	chrI	8702478	8705825	+	cdk-8
337	WBGene00000410	874.848	-0.151298	0.0938848	-1.61153	0.107065	0.205049	chrI	11323527	11333152	+	cdk-9
338	WBGene00000411	728.664	-0.498929	0.129366	-3.85673	0.000114913	0.00065332	chrII	10785452	10787272	+	cdl-1
339	WBGene00000412	274.042	-0.122672	0.145648	-0.842249	0.399649	0.547337	chrV	15921309	15922818	+	cdr-1
340	WBGene00000413	240.064	-0.358374	0.169837	-2.11011	0.0348488	0.0842934	chrI	3223160	3228104	-	cdt-1
341	WBGene00000414	853.764	0.175697	0.10336	1.69986	0.0891572	0.178427	chrIII	8426334	8428583	+	cec-1
342	WBGene00000415	3085.21	-0.297368	0.0723405	-4.11067	3.94505e-05	0.000256456	chrI	11851566	11868105	-	ced-1
343	WBGene00000416	303.034	-0.132449	0.133421	-0.992713	0.32085	0.466674	chrIV	1597316	1601620	+	ced-2
344	WBGene00000417	112.693	0.342744	0.206535	1.65949	0.0970163	0.190334	chrIV	13198372	13204133	-	ced-3
345	WBGene00000418	387.332	-0.20876	0.126081	-1.65577	0.0977686	0.191337	chrIII	4852313	4855177	+	ced-4
346	WBGene00000419	2519.67	-0.122559	0.0795832	-1.54001	0.123559	0.228794	chrIV	10484110	10492952	+	ced-5
347	WBGene00000420	942.699	-0.357193	0.0950366	-3.75848	0.000170952	0.000931061	chrIII	5595771	5598066	+	ced-6
348	WBGene00000421	3346.27	-0.55306	0.0647542	-8.54091	1.33166e-17	6.62818e-16	chrIII	9570394	9580081	-	ced-7
349	WBGene00000422	9.99731	-0.216423	0.397437	-0.544548	0.586064	0.712712	chrX	8414015	8416919	-	ced-8
350	WBGene00000423	526.318	0.0250983	0.113121	0.221871	0.824414	0.888575	chrIII	10335172	10337536	+	ced-9
351	WBGene00000424	1450.32	-0.0431244	0.0845763	-0.509887	0.610131	0.731076	chrIV	3506328	3509527	-	ced-10
352	WBGene00000425	469.642	0.15604	0.181881	0.857923	0.390935	0.538689	chrIII	9119559	9125153	+	ced-11
353	WBGene00000426	923.546	-0.0938554	0.0869725	-1.07914	0.280526	0.422067	chrI	10222881	10227009	-	ced-12
354	WBGene00000427	2.05691	0.524376	0.345734	1.5167	0.129342	0.236884	chrX	8299119	8299654	-	ced-13
355	WBGene00000428	17.4332	0.119825	0.351898	0.340511	0.733472	0.824666	chrX	4653434	4654157	-	ceh-1
356	WBGene00000429	38.5409	0.342403	0.29873	1.1462	0.251713	0.388743	chrI	6046832	6050462	-	ceh-2
357	WBGene00000430	13.6293	0.565318	0.384337	1.47089	0.14132	0.253809	chrI	9727169	9728034	+	ceh-5
358	WBGene00000431	166.917	-0.316599	0.186662	-1.6961	0.0898661	0.179356	chrI	8498114	8502412	-	ceh-6
359	WBGene00000432	1.55822	0.407367	0.267828	1.521	0.128259	0.235303	chrII	8703368	8703829	-	ceh-7
360	WBGene00000433	15.6096	-0.127551	0.377699	-0.337704	0.735586	0.82633	chrI	8245722	8250896	-	ceh-8
361	WBGene00000434	17.9982	-1.32876	0.371058	-3.58099	0.000342291	0.00169127	chrI	565436	566414	-	ceh-9
362	WBGene00000435	59.0834	0.37104	0.256322	1.44755	0.147742	0.261918	chrIII	5799073	5801109	+	ceh-10
363	WBGene00000436	15.325	0.148199	0.372848	0.397478	0.691015	0.794331	chrI	5840289	5841888	+	ceh-12
364	WBGene00000437	397.461	-0.369963	0.129481	-2.85729	0.0042728	0.014796	chrIII	7555617	7558208	+	ceh-13
365	WBGene00000438	47.3703	-0.357211	0.280638	-1.27285	0.203071	0.330821	chrX	7528616	7532732	-	ceh-14
366	WBGene00000439	88.4727	0.329863	0.238007	1.38594	0.165766	0.285342	chrIII	8622658	8626312	+	ceh-16
367	WBGene00000440	25.289	-0.314166	0.330723	-0.949938	0.342144	0.488773	chrI	4568962	4570027	-	ceh-17
368	WBGene00000441	1700.07	-0.27992	0.0866475	-3.23056	0.00123547	0.00513501	chrX	3843367	3857797	-	ceh-18
369	WBGene00000442	20.1377	-0.108635	0.342277	-0.317388	0.750949	0.837533	chrIV	7953509	7955898	-	ceh-19
370	WBGene00000443	1205.87	-0.582906	0.0904942	-6.44137	1.18401e-10	2.32812e-09	chrIII	6979884	6981785	+	ceh-20
371	WBGene00000444	209.833	0.543439	0.157562	3.44905	0.000562552	0.00260485	chrX	1848795	1852736	-	ceh-21
378	WBGene00000445	141.92	-0.187754	0.16727	-1.12246	0.261668	0.400661	chrV	10672459	10675644	+	ceh-22
379	WBGene00000446	90.198	-0.795858	0.214558	-3.70929	0.000207842	0.00110144	chrIII	7839594	7841491	+	ceh-23
380	WBGene00000447	44.6407	0.161563	0.265352	0.608862	0.542616	0.678252	chrV	13813309	13815272	+	ceh-24
381	WBGene00000448	525.465	-0.119389	0.122683	-0.973149	0.330479	0.476619	chrIII	8067289	8071455	+	pros-1
382	WBGene00000449	81.0083	-0.72097	0.223311	-3.22854	0.00124422	0.00516785	chrV	11661670	11665085	-	ceh-27
383	WBGene00000450	2.86354	-0.397316	0.370053	-1.07367	0.282969	0.424803	chrX	13074682	13076092	+	ceh-28
384	WBGene00000451	24.9724	-0.203061	0.367051	-0.553224	0.58011	0.708166	chrX	3063585	3065551	+	ceh-30
385	WBGene00000452	52.5694	-0.527346	0.260264	-2.0262	0.0427444	0.0995443	chrX	3068650	3070396	-	ceh-31
386	WBGene00000453	546.647	-0.362647	0.112292	-3.22949	0.00124012	0.00515197	chrV	11701764	11705400	-	ceh-32
387	WBGene00000454	70.6189	0.00699443	0.234456	0.0298326	0.976201	0.985262	chrV	5323204	5324616	-	ceh-33
388	WBGene00000455	173.003	-0.341038	0.172463	-1.97746	0.0479899	0.10917	chrV	5315513	5319577	-	ceh-34
389	WBGene00000457	9.19824	0.1881	0.4046	0.464904	0.642	0.757145	chrX	14183449	14185597	-	ceh-36
390	WBGene00000458	426.072	0.246731	0.138503	1.78142	0.0748445	0.155698	chrX	14197373	14209153	-	ceh-37
391	WBGene00000459	1382.37	-0.0285656	0.106295	-0.268739	0.78813	0.863841	chrII	6951640	6955399	+	ceh-38
392	WBGene00000460	130.177	0.0142576	0.188454	0.0756554	0.939693	0.963471	chrX	1853874	1856189	-	ceh-39
406	WBGene00000461	14.2147	0.323355	0.380296	0.850274	0.395173	0.542811	chrX	12318240	12320777	-	ceh-40
407	WBGene00000462	254.5	0.426194	0.138431	3.07874	0.00207875	0.00801784	chrX	1846608	1848675	-	ceh-41
408	WBGene00000463	272.075	-0.455725	0.139576	-3.26508	0.00109433	0.00462628	chrIII	4446637	4449943	-	ceh-43
409	WBGene00000464	2358.52	-0.144898	0.0741439	-1.95428	0.0506676	0.114082	chrIII	2530615	2546420	+	ceh-44
410	WBGene00000465	309.232	0.620297	0.158008	3.92573	8.64688e-05	0.000511008	chrIII	4489359	4491392	+	cpg-1
411	WBGene00000466	739.963	-0.206901	0.0961661	-2.15149	0.0314372	0.077666	chrI	9665194	9668664	+	cel-1
417	WBGene00000467	252.613	-0.326734	0.158551	-2.06075	0.0393272	0.0928777	chrI	8324120	8328853	+	cep-1
418	WBGene00000468	2.71518	-0.00463836	0.321748	-0.0144161	0.988498	0.992628	chrI	8633925	8636044	+	ces-1
419	WBGene00000469	42.7186	2.82268	0.349404	8.07857	6.55319e-16	2.608e-14	chrI	14961501	14965361	+	ces-2
420	WBGene00000472	9823.42	0.210944	0.0724217	2.91272	0.00358298	0.012776	chrII	11039348	11041206	-	cey-1
421	WBGene00000473	647.636	0.072091	0.120096	0.600276	0.548322	0.682117	chrI	5619569	5620668	+	cey-2
422	WBGene00000474	600.432	0.195588	0.105026	1.86228	0.0625639	0.135153	chrI	5571787	5573019	-	cey-3
423	WBGene00000475	16354.5	0.312641	0.0601408	5.19849	2.00917e-07	2.23381e-06	chrIII	10866870	10868727	-	cey-4
424	WBGene00000476	466.544	-0.345157	0.117359	-2.94103	0.00327123	0.0118188	chrI	9994731	9999928	-	cfi-1
425	WBGene00000477	1128.36	0.276114	0.0943378	2.92686	0.00342399	0.012276	chrV	5538800	5545766	+	cft-1
426	WBGene00000478	442.034	-0.0838321	0.116844	-0.717468	0.473086	0.615736	chrV	3441504	3444877	-	cfz-2
427	WBGene00000479	2592.35	0.00293766	0.104112	0.0282162	0.97749	0.986076	chrIII	7495320	7497832	-	cgh-1
428	WBGene00000480	1437.28	0.72686	0.116748	6.22588	4.78856e-10	8.52559e-09	chrV	118043	122966	-	cgp-1
436	WBGene00000481	531.928	-0.244077	0.108966	-2.23993	0.0250954	0.0649695	chrIV	3613934	3624697	-	cha-1
437	WBGene00000482	6586.95	-0.276019	0.0663257	-4.16157	3.16066e-05	0.000210484	chrX	12846437	12852601	-	chd-3
438	WBGene00000483	10.0567	1.24106	0.401806	3.08871	0.00201026	0.00779648	chrI	6517575	6520879	-	che-1
439	WBGene00000484	80.1054	-0.364123	0.224152	-1.62445	0.10428	0.200916	chrX	481378	486504	+	che-2
440	WBGene00000485	1294.4	-0.298227	0.0959336	-3.10868	0.00187927	0.00736033	chrI	8062059	8081671	-	che-3
441	WBGene00000487	23.442	1.2034	0.334312	3.59963	0.000318664	0.00159219	chrIV	2104056	2111408	-	che-6
442	WBGene00000488	172.945	-0.63882	0.167802	-3.80699	0.00014067	0.00078033	chrV	7961539	7968899	-	che-7
443	WBGene00000490	249.567	-0.369584	0.145126	-2.54665	0.0108763	0.032538	chrV	12144295	12150689	-	che-11
444	WBGene00000491	279.412	-1.13844	0.149983	-7.59047	3.18751e-14	1.03606e-12	chrV	10299473	10307354	-	che-12
445	WBGene00000492	112.803	0.470728	0.191668	2.45595	0.0140512	0.0403948	chrI	10507000	10515506	-	che-13
446	WBGene00000493	303.639	-0.678134	0.133802	-5.0682	4.01588e-07	4.22327e-06	chrI	5746633	5754278	+	che-14
447	WBGene00000496	315.585	0.230215	0.125847	1.82933	0.06735	0.143223	chrI	7554855	7559916	+	chs-1
448	WBGene00000497	188.977	-0.277667	0.233264	-1.19036	0.233907	0.367835	chrII	196985	211941	+	chs-2
449	WBGene00000498	455.999	0.0371427	0.111659	0.332644	0.739403	0.829547	chrV	3757047	3759469	-	chk-1
450	WBGene00000499	210.809	-0.396534	0.159187	-2.49099	0.0127387	0.0371128	chrV	19908765	19916023	-	chk-2
451	WBGene00000500	525.036	-0.332011	0.112176	-2.95973	0.00307909	0.0112043	chrI	6181314	6183913	-	chn-1
452	WBGene00000501	640.398	-0.699009	0.125744	-5.559	2.7133e-08	3.56062e-07	chrIV	13209729	13214566	-	cho-1
453	WBGene00000502	1388.91	-0.0115587	0.10617	-0.10887	0.913305	0.947164	chrI	5103581	5104956	-	chp-1
454	WBGene00000503	28.4304	-0.134285	0.344979	-0.389257	0.697086	0.797999	chrX	3397613	3400017	-	cht-1
455	WBGene00000506	266.75	-0.255818	0.131538	-1.94482	0.0517969	0.115967	chrIII	2394325	2401308	-	cic-1
456	WBGene00000507	456.208	-0.441262	0.122848	-3.59193	0.000328244	0.00163202	chrIII	8005935	8009821	-	cit-1.1
457	WBGene00000508	1073.74	-0.377157	0.103059	-3.65963	0.000252581	0.00130742	chrIII	8010778	8013774	+	cit-1.2
458	WBGene00000509	977.928	0.0412795	0.0932945	0.442465	0.658153	0.769242	chrIV	9731737	9737621	-	cka-1
459	WBGene00000510	635.486	-0.0209247	0.0987332	-0.211932	0.83216	0.893602	chrX	4286737	4291494	+	cka-2
460	WBGene00000511	310.996	0.0186417	0.121748	0.153117	0.878306	0.924567	chrIII	4365285	4367469	+	ckb-1
461	WBGene00000512	655.371	-0.25346	0.160336	-1.5808	0.113923	0.214894	chrIII	4367832	4370160	+	ckb-2
465	WBGene00000513	11.9981	0.971246	0.404269	2.40248	0.0162845	0.0456451	chrIII	4370885	4372820	+	ckb-3
466	WBGene00000514	812.734	-0.0366535	0.166136	-0.220624	0.825386	0.888989	chrV	2106398	2109418	-	ckb-4
467	WBGene00000515	972.141	0.0107485	0.0921401	0.116654	0.907134	0.943174	chrX	3576608	3578830	+	ckc-1
468	WBGene00000516	803.317	0.0619392	0.115761	0.535063	0.592606	0.717752	chrII	7811240	7812105	+	cki-1
469	WBGene00000517	150.905	-0.148627	0.164043	-0.906025	0.364923	0.511357	chrII	7816509	7820301	+	cki-2
479	WBGene00000518	565.122	-0.328062	0.120872	-2.71412	0.00664524	0.0215725	chrIII	5635479	5654558	+	ckk-1
480	WBGene00000519	586.987	-0.0934489	0.0992191	-0.941844	0.346273	0.493013	chrIII	11154827	11168820	+	cku-70
481	WBGene00000520	467.785	-0.0510059	0.120547	-0.423121	0.672207	0.780177	chrIII	4419848	4423368	+	cku-80
482	WBGene00000521	46.7035	-1.13946	0.37457	-3.04205	0.00234973	0.00889769	chrV	12736703	12741211	+	cky-1
483	WBGene00000522	351.761	-0.109241	0.167507	-0.652153	0.514302	0.65253	chrX	11047446	11049271	+	clc-1
484	WBGene00000523	274.245	-0.55739	0.139233	-4.00327	6.24718e-05	0.000385531	chrX	7431472	7433548	+	clc-2
485	WBGene00000524	188.799	-0.853221	0.154912	-5.50777	3.63413e-08	4.66986e-07	chrX	3373247	3374740	-	clc-3
486	WBGene00000525	31.5189	2.24423	0.360514	6.22508	4.81318e-10	8.56109e-09	chrX	10782996	10783907	-	clc-4
487	WBGene00000526	427.819	-0.162825	0.120971	-1.34599	0.178306	0.300639	chrX	7433632	7435733	+	clc-5
488	WBGene00000527	1306.01	-0.501919	0.0828787	-6.05607	1.39486e-09	2.31006e-08	chrI	8705670	8724279	-	cle-1
489	WBGene00000528	1763.96	-0.137141	0.0852397	-1.60889	0.107641	0.205806	chrII	11846508	11854743	-	clh-1
490	WBGene00000529	508.985	-0.63336	0.138283	-4.58019	4.64561e-06	3.7817e-05	chrII	11358447	11370311	+	clh-2
491	WBGene00000530	457.741	0.0513901	0.122737	0.418701	0.675435	0.782779	chrII	7217955	7225648	-	clh-3
492	WBGene00000531	296.48	0.154209	0.136823	1.12707	0.259715	0.398539	chrX	4094867	4100573	-	clh-4
493	WBGene00000532	2121.73	-0.156735	0.074583	-2.10148	0.0355988	0.0857554	chrII	9094710	9098605	-	clh-5
494	WBGene00000533	990.466	-0.0397221	0.0864361	-0.459555	0.645836	0.760049	chrV	12060234	12063368	-	clh-6
495	WBGene00000534	1609.54	0.0225077	0.10467	0.215035	0.82974	0.892158	chrV	6044028	6045671	+	cpi-2
496	WBGene00000535	1003.89	0.611971	0.0921569	6.64054	3.12539e-11	6.74044e-10	chrIV	6092603	6093680	-	cpi-1
498	WBGene00000536	641.155	-0.0468856	0.115589	-0.405622	0.68502	0.789281	chrIII	5277894	5279344	+	clk-1
499	WBGene00000537	606.466	0.13903	0.110727	1.25561	0.209257	0.33829	chrIII	7515223	7518524	-	clk-2
500	WBGene00000539	562.067	0.169934	0.107689	1.57801	0.114563	0.215923	chrV	11263523	11265711	-	cln-3.1
504	WBGene00000540	360.532	0.00707233	0.127838	0.0553225	0.955882	0.9726	chrI	5274693	5278708	-	cln-3.2
505	WBGene00000541	937.968	-0.274297	0.131462	-2.08652	0.0369319	0.0883031	chrV	8682955	8686160	+	cln-3.3
506	WBGene00000542	5714.14	0.354695	0.105871	3.35027	0.000807315	0.00356299	chrIII	7980913	7986327	+	clp-1
507	WBGene00000543	690.044	-0.186979	0.106145	-1.76155	0.078146	0.161153	chrIII	4700325	4704054	-	clp-2
508	WBGene00000544	16.8948	0.731721	0.369676	1.97936	0.0477756	0.108791	chrI	12073143	12084221	-	clp-3
509	WBGene00000545	1628.37	0.0106007	0.0798297	0.132792	0.894358	0.935411	chrIII	1807740	1818323	-	clp-4
510	WBGene00000546	19.1141	1.68073	0.363119	4.6286	3.68143e-06	3.06932e-05	chrIV	1431272	1435039	-	clp-6
511	WBGene00000547	1692.45	-0.169675	0.0873929	-1.94152	0.0521955	0.116673	chrIV	1435465	1446182	-	clp-7
512	WBGene00000548	3570.13	-0.190318	0.0691679	-2.75153	0.00593169	0.0196294	chrII	5466363	5473812	+	clr-1
513	WBGene00000549	6275.04	1.44937	0.148055	9.78943	1.25005e-22	9.28235e-21	chrIII	9055052	9058882	+	cls-2
514	WBGene00000550	25712.6	0.0840689	0.0692415	1.21414	0.224694	0.356881	chrIII	9516631	9521460	-	clu-1
515	WBGene00000551	11.4027	2.00791	0.402981	4.98264	6.27238e-07	6.27479e-06	chrIV	7734647	7736409	+	clx-1
516	WBGene00000552	6986.57	-0.345773	0.0627301	-5.51207	3.54635e-08	4.56849e-07	chrV	1156271	1158174	+	cmd-1
517	WBGene00000553	287.839	-0.787528	0.177285	-4.44216	8.90609e-06	6.80701e-05	chrIV	1824481	1834029	+	cmk-1
518	WBGene00000554	1691.66	-0.418856	0.0891239	-4.6997	2.60546e-06	2.2535e-05	chrV	11375742	11377990	+	cnb-1
519	WBGene00000555	0.230004	0.0481748	0.155136	0.310532	0.756156	NA	chrV	1444044	1444280	-	cnc-1
520	WBGene00000556	50.4676	1.05411	0.281537	3.74411	0.000181037	0.000976668	chrV	1449665	1450189	-	cnc-2
521	WBGene00000557	197.653	-0.777495	0.260592	-2.98357	0.00284909	0.0104907	chrV	1448004	1448790	+	cnc-3
522	WBGene00000558	90.5819	1.28777	0.285416	4.51192	6.42437e-06	5.05183e-05	chrV	1447195	1447707	+	cnc-4
523	WBGene00000559	0.478657	0.113643	0.155621	0.730255	0.465234	NA	chrV	1445381	1445832	+	cnc-5
524	WBGene00000560	1.13481	0.0991337	0.279761	0.354351	0.723076	NA	chrIII	1763524	1764836	+	cnc-6
525	WBGene00000561	8.55048	1.07162	0.405582	2.64218	0.00823732	0.0257524	chrIII	5240593	5242108	-	cnd-1
526	WBGene00000562	63.1052	-0.0326708	0.243445	-0.134202	0.893243	0.934743	chrV	15025740	15031473	-	cng-1
527	WBGene00000563	34.7741	-0.342328	0.295822	-1.15721	0.247187	0.383341	chrIV	9477522	9481037	-	cng-3
528	WBGene00000564	698.677	-0.115421	0.0969128	-1.19098	0.233662	0.367482	chrIII	10271257	10278579	+	cnk-1
529	WBGene00000565	906.375	0.00315355	0.114046	0.0276516	0.97794	0.986284	chrII	12072082	12088868	-	cnt-1
530	WBGene00000566	3047.7	-0.227004	0.0721712	-3.14535	0.00165887	0.00661196	chrIII	10655018	10677521	+	cnt-2
531	WBGene00000567	7019.91	-0.212436	0.0607065	-3.49939	0.00046633	0.002208	chrIII	9814364	9817137	-	cnx-1
532	WBGene00000583	215.859	0.107324	0.151169	0.70996	0.477729	0.619529	chrI	6250475	6252834	+	cof-2
533	WBGene00000584	50.8935	-0.58843	0.267736	-2.1978	0.0279634	0.070866	chrII	14902493	14907533	+	cog-1
534	WBGene00000585	873.386	-0.877521	0.0895266	-9.80179	1.10613e-22	8.24724e-21	chrIV	7036960	7039580	-	cogc-2
535	WBGene00000591	769.455	-0.096268	0.121235	-0.794062	0.427159	0.573997	chrX	7465193	7475014	-	coh-1
536	WBGene00000592	179.235	-0.0517741	0.153892	-0.336432	0.736545	0.827255	chrV	14457475	14460136	+	coh-3
537	WBGene00000593	3.29658	0.496625	0.38865	1.27782	0.201312	0.328717	chrIV	10084454	10085438	-	col-2
538	WBGene00000594	163141	0.325123	0.110386	2.94533	0.00322606	0.0116694	chrIV	8824783	8826013	+	col-3
540	WBGene00000596	4.89607	-0.218319	0.363119	-0.601234	0.547684	0.68188	chrI	7401674	7402753	+	col-7
541	WBGene00000597	24.7748	1.46006	0.340728	4.2851	1.82655e-05	0.000129224	chrIII	7019583	7020600	-	col-8
542	WBGene00000598	4.06565	0.993669	0.391884	2.53562	0.0112248	0.0334001	chrX	13590035	13591207	+	col-9
543	WBGene00000599	143353	0.495772	0.117424	4.22207	2.42073e-05	0.000165989	chrV	9164297	9165307	-	col-10
545	WBGene00000601	4877	1.2005	0.334244	3.59168	0.000328555	0.00163268	chrV	10423907	10425092	-	col-12
549	WBGene00000602	3456.72	0.909243	0.360364	2.52312	0.0116318	0.0344149	chrV	10420890	10421892	-	col-13
551	WBGene00000603	311.79	1.37566	0.222778	6.17502	6.61566e-10	1.15977e-08	chrIV	7753408	7754651	+	col-14
552	WBGene00000606	1178.35	-0.460152	0.385755	-1.19286	0.232924	0.366732	chrII	4866436	4867576	-	col-17
553	WBGene00000608	5.10006	-0.273189	0.395175	-0.691313	0.489369	0.630283	chrX	421707	423033	+	col-19
554	WBGene00000609	4.94613	-0.0991134	0.397259	-0.249493	0.80298	0.873699	chrII	4869607	4870791	-	col-20
555	WBGene00000610	12.1356	1.13277	0.395324	2.86541	0.00416466	0.0145092	chrIV	4263293	4265202	+	col-33
556	WBGene00000611	609.379	0.187231	0.176015	1.06372	0.287455	0.42949	chrIV	4243548	4244610	-	col-34
557	WBGene00000612	13.4218	1.49756	0.385045	3.88931	0.000100528	0.000583561	chrI	7385907	7386935	-	col-35
558	WBGene00000613	66.6639	3.41874	0.337852	10.119	4.54872e-24	3.88278e-22	chrII	7167513	7168662	-	col-36
559	WBGene00000614	5.46468	1.31939	0.402557	3.27753	0.00104718	0.00445584	chrV	12166706	12167753	-	col-37
560	WBGene00000615	20.7207	0.464705	0.352369	1.3188	0.187236	0.311553	chrII	8568035	8569089	-	col-38
561	WBGene00000616	27674.1	1.33337	0.268431	4.96727	6.7901e-07	6.71547e-06	chrII	10704902	10706019	+	col-39
562	WBGene00000617	1.9882	0.140896	0.333235	0.422813	0.672432	0.780289	chrII	1104945	1106925	-	col-40
563	WBGene00000618	433.978	-0.0537492	0.240958	-0.223064	0.823486	0.887768	chrX	15175035	15176481	-	col-41
564	WBGene00000620	9.60989	0.512497	0.404388	1.26734	0.205034	0.332939	chrV	8049744	8050893	-	col-43
565	WBGene00000621	2.65552	0.573172	0.359712	1.59342	0.111066	0.210811	chrX	13591498	13592461	+	col-44
567	WBGene00000622	8.56991	0.187293	0.405556	0.461819	0.644211	0.758969	chrI	115739	117438	+	col-45
568	WBGene00000623	410.979	-0.893404	0.391398	-2.2826	0.0224541	0.0594102	chrI	741913	745570	-	col-46
569	WBGene00000624	67.6543	-1.28552	0.328784	-3.90991	9.23319e-05	0.000541627	chrI	745859	748288	+	col-47
570	WBGene00000625	157.533	0.718459	0.203088	3.53768	0.000403662	0.0019471	chrI	3010688	3011648	+	col-48
571	WBGene00000626	6.98637	0.562729	0.405556	1.38755	0.165274	0.284575	chrI	3137185	3138447	+	col-49
572	WBGene00000627	6.52738	1.67317	0.402259	4.15945	3.19021e-05	0.000212143	chrI	3651230	3652599	-	col-50
573	WBGene00000628	21.7155	2.50131	0.388959	6.43078	1.26952e-10	2.47232e-09	chrI	3653997	3655265	+	col-51
574	WBGene00000629	27.0087	1.79164	0.354859	5.04889	4.44385e-07	4.62804e-06	chrI	4571214	4572787	-	col-52
575	WBGene00000630	54.1986	0.10549	0.278167	0.379232	0.704515	0.803282	chrI	5644729	5646370	+	col-53
576	WBGene00000631	48.4929	0.572853	0.303776	1.88578	0.0593251	0.129613	chrI	5842709	5844050	+	col-54
577	WBGene00000632	2.67764	0.830838	0.36208	2.29462	0.0217547	0.0579036	chrI	6199141	6200193	+	col-55
578	WBGene00000633	1.12744	0.0730559	0.278963	0.261884	0.793411	NA	chrI	6232777	6234280	+	col-56
579	WBGene00000634	36.9177	0.719305	0.310542	2.31629	0.0205425	0.0552325	chrI	6311229	6312413	+	col-58
580	WBGene00000636	9.5482	0.993206	0.40056	2.47954	0.013155	0.0381433	chrI	7105302	7106926	+	col-60
581	WBGene00000637	28.6921	-0.487213	0.32452	-1.50133	0.133269	0.242429	chrI	7202242	7203533	-	col-61
582	WBGene00000638	31.811	1.39506	0.34995	3.98645	6.70695e-05	0.000409752	chrI	7403291	7404374	-	col-62
583	WBGene00000639	16.3872	2.00872	0.381953	5.25909	1.4477e-07	1.65945e-06	chrI	8243695	8244963	-	col-63
584	WBGene00000640	26.279	1.47948	0.337225	4.38723	1.14806e-05	8.51464e-05	chrI	9893698	9895596	-	col-64
585	WBGene00000641	151.188	0.798764	0.218788	3.65085	0.000261369	0.00134226	chrI	11489158	11490630	-	col-65
586	WBGene00000644	34.1646	-0.699191	0.313223	-2.23224	0.0255988	0.0658795	chrII	104534	105833	+	col-68
587	WBGene00000645	51.8307	1.07637	0.292255	3.683	0.000230508	0.00120685	chrII	303924	305530	-	col-69
588	WBGene00000646	2.5607	0.079247	0.371841	0.213121	0.831233	0.892974	chrII	1470565	1472260	+	H17B01.2
589	WBGene00000647	84.9722	0.539249	0.226255	2.38337	0.017155	0.0476318	chrII	3500077	3502449	-	col-71
590	WBGene00000648	7.60098	0.491253	0.400033	1.22803	0.219434	0.350681	chrII	3520703	3524180	-	col-72
591	WBGene00000649	724.777	-0.214153	0.358489	-0.597377	0.550256	0.683824	chrII	4872098	4873127	-	col-73
592	WBGene00000650	19.4088	-0.334521	0.357277	-0.936307	0.349115	0.495901	chrII	5830867	5832014	+	col-74
593	WBGene00000651	1.82354	0.0294223	0.306723	0.0959246	0.92358	0.953759	chrII	6426293	6427513	+	col-75
594	WBGene00000652	432.448	0.00758022	0.124829	0.060725	0.951578	0.970282	chrII	8204341	8207491	+	col-76
595	WBGene00000653	179.068	0.972055	0.289619	3.35632	0.000789872	0.00349699	chrII	8358228	8359381	-	col-77
596	WBGene00000654	2.67018	0.773468	0.3354	2.3061	0.0211048	0.056503	chrII	9152531	9154310	+	col-78
597	WBGene00000655	33.9987	1.29139	0.314767	4.10269	4.08374e-05	0.00026425	chrII	10703596	10704572	+	col-79
598	WBGene00000656	6560.8	0.641219	0.116279	5.51449	3.49786e-08	4.51239e-07	chrII	10707201	10708286	+	col-80
599	WBGene00000657	25.6658	1.46105	0.363736	4.01678	5.89986e-05	0.000367073	chrII	11012397	11013820	-	col-81
600	WBGene00000658	10.2573	1.29944	0.397481	3.26919	0.00107855	0.00456697	chrII	11044135	11045968	-	col-83
601	WBGene00000659	61.2573	1.27736	0.297052	4.30011	1.70713e-05	0.000121718	chrII	11868535	11869688	+	col-84
602	WBGene00000660	13.949	1.21874	0.40517	3.00796	0.00263005	0.0098027	chrII	12493800	12495106	-	col-85
603	WBGene00000661	5.85801	0.459341	0.404091	1.13673	0.255652	0.393594	chrII	13096009	13098275	-	col-86
604	WBGene00000662	28.7135	1.86188	0.340243	5.4722	4.44475e-08	5.60719e-07	chrII	14090075	14094690	-	col-87
605	WBGene00000663	48.8353	2.73106	0.298747	9.14173	6.14635e-20	3.66913e-18	chrIII	41061	42021	+	col-88
606	WBGene00000664	63.73	-0.170911	0.252081	-0.677999	0.497772	0.638226	chrIII	4748127	4749164	+	col-89
607	WBGene00000665	699.072	-0.257233	0.384554	-0.668911	0.503552	0.643539	chrIII	7948838	7950068	+	col-90
609	WBGene00000666	2062.39	0.519777	0.279832	1.85746	0.0632457	0.136368	chrIII	8262355	8263664	-	col-91
610	WBGene00000667	26892	0.928119	0.238284	3.89501	9.81965e-05	0.000572171	chrIII	10982166	10983253	-	col-92
611	WBGene00000668	60838.8	0.823651	0.146251	5.63177	1.78366e-08	2.42969e-07	chrIII	10984555	10985609	-	col-93
612	WBGene00000669	20959.2	0.73542	0.162129	4.53601	5.73276e-06	4.56497e-05	chrIII	10986826	10987873	-	col-94
613	WBGene00000670	29.5649	3.40966	0.369961	9.21626	3.07652e-20	1.91144e-18	chrIII	11703885	11705091	+	col-95
614	WBGene00000671	41.4244	1.60778	0.343181	4.68492	2.80067e-06	2.40525e-05	chrIII	11705713	11706644	-	col-96
615	WBGene00000672	481.121	2.72621	0.211424	12.8945	4.83444e-38	8.17691e-36	chrIII	12992405	12993707	-	col-97
616	WBGene00000673	23009.6	0.0662507	0.084633	0.782801	0.433744	0.580157	chrIII	13018935	13020226	+	col-98
617	WBGene00000674	473.776	0.0980614	0.115937	0.845814	0.397656	0.545181	chrIV	138346	147919	-	col-99
618	WBGene00000675	110.138	-0.158776	0.289539	-0.548375	0.583435	0.710651	chrIV	325437	326711	-	col-101
619	WBGene00000676	1.58826	0.39808	0.329467	1.20825	0.22695	0.359744	chrIV	604444	605876	+	col-102
620	WBGene00000677	23260.9	0.166563	0.0918523	1.81338	0.0697736	0.147092	chrIV	762416	763680	-	col-103
621	WBGene00000678	252.701	1.57871	0.250467	6.30308	2.9178e-10	5.37292e-09	chrIV	1353636	1355305	-	col-104
622	WBGene00000679	7.37589	0.691662	0.405463	1.70586	0.0880346	0.176737	chrIV	1357816	1359225	-	col-105
623	WBGene00000680	6.02072	0.906103	0.404621	2.23939	0.0251308	0.0650233	chrIV	1459866	1460786	-	col-106
624	WBGene00000681	7086.65	0.101986	0.249305	0.409079	0.682482	0.787525	chrIV	1548721	1549714	+	col-107
625	WBGene00000682	11.0599	0.630848	0.392227	1.60838	0.107753	0.205996	chrIV	1768621	1769667	+	col-108
626	WBGene00000683	119.212	0.720813	0.22512	3.2019	0.00136524	0.00561308	chrIV	1817311	1820253	-	col-109
627	WBGene00000684	35.3601	1.41469	0.341392	4.1439	3.41452e-05	0.000225418	chrIV	4608201	4609679	-	col-110
628	WBGene00000685	134.493	0.896873	0.208781	4.29576	1.74099e-05	0.000123818	chrIV	4655776	4657783	-	col-111
629	WBGene00000687	46.3914	0.422969	0.297267	1.42286	0.154777	0.271127	chrIV	7150663	7152501	-	col-113
630	WBGene00000688	9.07125	1.61084	0.403517	3.99199	6.55215e-05	0.000401773	chrIV	7245505	7246640	-	col-114
631	WBGene00000689	40.9862	0.721618	0.293979	2.45466	0.0141019	0.0404986	chrIV	7988685	7991425	+	col-115
632	WBGene00000690	1.5991	0.137361	0.320242	0.42893	0.667974	0.777237	chrIV	8356776	8357854	+	col-116
633	WBGene00000691	178413	0.432853	0.0994552	4.35224	1.34754e-05	9.85016e-05	chrIV	8822962	8824195	-	col-117
635	WBGene00000692	1797.61	0.356757	0.274395	1.30016	0.193546	0.319435	chrIV	8848182	8849673	+	col-118
636	WBGene00000693	39.498	-0.0384401	0.319767	-0.120213	0.904315	0.942065	chrIV	8978823	8979812	-	col-119
637	WBGene00000694	5.2908	0.171349	0.401641	0.426622	0.669655	0.778339	chrIV	9260610	9261787	-	col-120
638	WBGene00000695	2.76758	0.605811	0.36691	1.65111	0.0987152	0.192838	chrIV	9394934	9396218	-	col-121
639	WBGene00000696	21.3664	0.0672217	0.369954	0.181703	0.855816	0.909065	chrIV	9563360	9564441	+	col-122
640	WBGene00000697	277.004	-0.484876	0.364037	-1.33194	0.18288	0.30623	chrIV	9821895	9823112	+	col-123
641	WBGene00000698	228.78	0.307978	0.193259	1.5936	0.111025	0.210754	chrIV	10216450	10217643	+	col-124
642	WBGene00000699	47791.7	0.668412	0.133009	5.02533	5.02573e-07	5.18672e-06	chrIV	11225505	11226519	+	col-125
643	WBGene00000700	27.1315	0.762421	0.341164	2.23477	0.0254327	0.0655816	chrIV	11263401	11264331	+	col-126
644	WBGene00000701	27.1315	0.762421	0.341164	2.23477	0.0254327	0.0655816	chrIV	11264947	11265877	-	col-127
645	WBGene00000702	541.066	-0.718079	0.388947	-1.84621	0.0648617	0.139064	chrIV	11550002	11551987	-	col-128
646	WBGene00000703	72.9859	-0.0981552	0.223197	-0.43977	0.660104	0.770881	chrIV	12108672	12110275	-	col-129
647	WBGene00000704	544.449	1.24912	0.183244	6.81671	9.31487e-12	2.20694e-10	chrIV	12427506	12428522	-	col-130
648	WBGene00000705	11.7112	-0.213912	0.396377	-0.539669	0.589425	0.715292	chrIV	13065766	13067300	-	col-131
649	WBGene00000706	7.4184	1.40655	0.405562	3.46817	0.000524024	0.00244692	chrIV	13089578	13091067	-	col-132
650	WBGene00000707	107.955	1.17024	0.239849	4.87908	1.06579e-06	1.01084e-05	chrIV	14098325	14099368	-	col-133
651	WBGene00000708	1.49092	0.410675	0.268678	1.5285	0.126388	0.232749	chrIV	15129666	15131797	-	col-135
652	WBGene00000710	5.17153	0.326028	0.397418	0.820366	0.412007	0.559481	chrIV	16601480	16602776	-	col-137
653	WBGene00000711	112.996	1.3013	0.194731	6.68254	2.3484e-11	5.19349e-10	chrIV	17182798	17183740	-	col-138
654	WBGene00000712	15.61	1.04927	0.385113	2.72458	0.00643841	0.0210019	chrV	4652863	4654007	-	col-139
655	WBGene00000713	105.894	0.159155	0.234108	0.679837	0.496608	0.637001	chrV	5835855	5836871	-	col-140
656	WBGene00000714	383.506	0.75201	0.142444	5.27934	1.29649e-07	1.49703e-06	chrV	6829666	6830721	+	col-141
657	WBGene00000715	5671.35	0.712277	0.0684774	10.4016	2.4371e-25	2.24841e-23	chrV	6831163	6832256	+	col-142
659	WBGene00000716	21.3879	0.79527	0.337076	2.35932	0.0183086	0.0503329	chrV	6835635	6836700	+	col-143
661	WBGene00000717	137481	0.664607	0.112656	5.89942	3.64781e-09	5.62792e-08	chrV	9159642	9160642	-	col-144
663	WBGene00000718	744.736	1.05325	0.166936	6.30928	2.80337e-10	5.17787e-09	chrV	9162051	9163005	-	col-145
664	WBGene00000719	2950.4	1.37874	0.320216	4.30564	1.665e-05	0.00011904	chrV	9629943	9631012	+	col-146
666	WBGene00000720	64967.7	0.709323	0.119871	5.91737	3.27131e-09	5.09873e-08	chrV	9632029	9633338	-	col-147
668	WBGene00000721	5.03666	0.821229	0.388559	2.11353	0.0345558	0.0837731	chrV	10241784	10242718	+	col-148
669	WBGene00000722	11882.2	-0.564008	0.340385	-1.65697	0.0975253	0.191036	chrV	10291697	10292869	-	col-149
670	WBGene00000723	464.74	0.598725	0.175608	3.40944	0.000650959	0.00295243	chrV	10293563	10294623	-	col-150
671	WBGene00000724	7.31814	0.0256535	0.405014	0.0633398	0.949496	0.969505	chrV	10393531	10395232	-	col-151
672	WBGene00000725	54.8924	3.56115	0.316152	11.2641	1.97462e-29	2.2544e-27	chrV	10560921	10562150	+	col-152
673	WBGene00000726	159.521	-0.0737875	0.209677	-0.35191	0.724906	0.817853	chrV	10949857	10951821	+	col-153
674	WBGene00000727	10673.2	0.214937	0.108796	1.97559	0.0482016	0.109535	chrV	11385360	11386529	+	col-154
675	WBGene00000728	3799.87	0.336291	0.100392	3.34977	0.000808793	0.00356666	chrV	11388852	11389876	-	col-155
676	WBGene00000729	72.0417	0.919401	0.262144	3.50723	0.000452796	0.00215172	chrV	11449223	11450357	-	col-156
677	WBGene00000730	238.667	0.736095	0.186669	3.94332	8.03606e-05	0.000480192	chrV	11484032	11484998	+	col-157
679	WBGene00000731	522.395	-1.28794	0.186831	-6.89361	5.4394e-12	1.33014e-10	chrV	11829582	11831220	+	col-158
680	WBGene00000732	15807.1	1.00763	0.167206	6.02627	1.67785e-09	2.75376e-08	chrV	13198230	13199315	-	col-159
681	WBGene00000733	77900.7	0.762382	0.161075	4.73308	2.21142e-06	1.93375e-05	chrV	13200982	13202192	-	col-160
682	WBGene00000734	1280.46	1.25947	0.332651	3.78615	0.000152997	0.000842061	chrV	13317028	13318011	-	col-161
684	WBGene00000735	140.88	1.1663	0.258564	4.51068	6.46206e-06	5.07273e-05	chrV	13441967	13443402	+	col-162
686	WBGene00000736	11.3122	0.944398	0.400604	2.35743	0.0184018	0.0505103	chrV	20600095	20602474	+	col-163
687	WBGene00000737	42.3891	3.37697	0.341283	9.89491	4.38026e-23	3.34787e-21	chrX	2093475	2094842	+	col-164
688	WBGene00000738	4.03974	0.310179	0.397213	0.780888	0.434868	0.58115	chrX	4353618	4354820	+	col-165
689	WBGene00000739	146240	0.373979	0.0967929	3.8637	0.000111681	0.00063653	chrX	6279801	6281015	+	col-166
690	WBGene00000740	141413	0.352608	0.0900489	3.91574	9.01284e-05	0.000530326	chrX	6323297	6324539	+	col-167
691	WBGene00000741	41967.5	0.376675	0.107449	3.5056	0.00045558	0.00216192	chrX	6326191	6327375	+	col-168
692	WBGene00000742	31994.4	0.443376	0.0799931	5.54268	2.97873e-08	3.88661e-07	chrX	6329160	6330127	+	col-169
693	WBGene00000743	12416.3	0.347354	0.0591999	5.86748	4.42461e-09	6.73537e-08	chrX	6331620	6332686	+	col-170
694	WBGene00000744	8.98013	0.231308	0.396852	0.582856	0.55999	0.691218	chrX	6334298	6335221	+	col-171
695	WBGene00000745	33.5835	-0.697932	0.325818	-2.14209	0.0321859	0.0792051	chrX	6672830	6674407	+	col-172
696	WBGene00000746	53.1304	-0.750283	0.290105	-2.58625	0.00970272	0.0295006	chrX	6875131	6877536	-	col-173
697	WBGene00000747	11.2509	-0.328563	0.387921	-0.846983	0.397005	0.544492	chrX	7546842	7548365	+	col-174
698	WBGene00000748	13.203	1.58829	0.387308	4.10084	4.11654e-05	0.000266089	chrX	9233638	9234618	-	col-175
699	WBGene00000749	2648.72	-0.428291	0.157901	-2.71239	0.0066799	0.0216619	chrX	10077597	10078602	+	col-176
700	WBGene00000750	84.1777	-0.510187	0.238591	-2.13833	0.0324899	0.0798027	chrX	10999742	11001850	-	col-177
701	WBGene00000751	8.12099	0.438968	0.401348	1.09374	0.274071	0.414682	chrX	11199455	11200464	+	col-178
702	WBGene00000752	3.81974	0.551502	0.380775	1.44837	0.147515	0.261616	chrX	11201465	11202488	+	col-179
703	WBGene00000753	5654.54	0.404392	0.171573	2.35697	0.0184247	0.0505578	chrX	11711307	11712280	-	col-180
704	WBGene00000754	7.2794	0.313198	0.404411	0.774456	0.438661	0.584761	chrX	12104930	12106081	+	col-181
705	WBGene00000755	11.784	0.214884	0.40295	0.533275	0.593843	0.718726	chrX	12636153	12637056	-	col-182
706	WBGene00000756	3.02862	0.456179	0.368232	1.23884	0.215406	0.345888	chrX	13466737	13467736	-	col-183
707	WBGene00000757	64.7262	0.0984954	0.248973	0.395607	0.692395	0.795348	chrX	13469387	13470471	+	col-184
708	WBGene00000758	0.997379	0.221048	0.24868	0.888884	0.374065	NA	chrX	13510110	13511097	-	col-185
710	WBGene00000759	81.2381	0.200145	0.255095	0.784591	0.432693	0.57926	chrX	15951503	15954570	+	col-186
711	WBGene00000760	6.30002	-0.183986	0.405604	-0.453609	0.65011	0.763456	chrX	16072903	16074852	+	col-187
712	WBGene00000761	2038.52	0.191742	0.0760116	2.52254	0.0116512	0.0344556	chrI	5412841	5415629	-	coq-1
713	WBGene00000762	795.716	-0.173211	0.0967495	-1.79031	0.0734046	0.153279	chrIII	6935967	6939443	+	coq-2
714	WBGene00000763	883.202	-0.0360578	0.0951841	-0.378822	0.70482	0.803429	chrIV	14793119	14796375	-	coq-3
715	WBGene00000764	282.541	-0.186859	0.141439	-1.32113	0.186457	0.31063	chrI	3869214	3870114	+	coq-4
717	WBGene00000765	1446.94	0.2026	0.0862948	2.34776	0.0188865	0.0515795	chrIII	7857315	7858457	-	coq-5
718	WBGene00000766	1534.11	0.26986	0.0848366	3.18094	0.00146799	0.00596171	chrV	9336762	9338858	+	coq-6
719	WBGene00000767	5754.6	0.149342	0.073404	2.03452	0.0418989	0.098036	chrIII	4863427	4866949	+	coq-8
720	WBGene00000768	2276.42	0.329531	0.0694537	4.74461	2.08905e-06	1.8373e-05	chrIII	10249111	10254709	+	cor-1
721	WBGene00000770	19.6402	-0.0502347	0.346156	-0.145122	0.884615	0.928373	chrIII	9322316	9324733	+	cpb-1
722	WBGene00000771	5.84689	0.851434	0.403208	2.11165	0.0347165	0.084063	chrII	6192784	6195170	+	cpb-2
723	WBGene00000772	257.254	0.113029	0.15613	0.723941	0.469102	0.612734	chrI	5788634	5791752	-	cpb-3
724	WBGene00000773	618.32	-0.0890253	0.0987495	-0.901526	0.367309	0.513946	chrII	8600435	8602479	-	cpf-1
725	WBGene00000774	960.619	0.0435356	0.0849554	0.512453	0.608334	0.729999	chrIII	13266874	13268897	-	cpf-2
726	WBGene00000775	459.216	-0.333224	0.126121	-2.6421	0.0082394	0.0257545	chrIV	9451338	9453372	+	cpin-1
727	WBGene00000776	11637.2	-0.253395	0.107114	-2.36566	0.0179979	0.0496179	chrV	16592572	16595346	-	cpl-1
728	WBGene00000777	1200.41	0.130192	0.091592	1.42143	0.155192	0.271671	chrI	8636123	8637971	-	cpn-1
729	WBGene00000778	130.286	-0.662578	0.265528	-2.49532	0.0125843	0.0367628	chrII	337339	339248	+	cpn-2
730	WBGene00000779	8497.4	0.280901	0.0948918	2.96022	0.00307419	0.0111932	chrI	3987842	3988699	+	cpn-3
731	WBGene00000780	2055.79	1.10797	0.129862	8.53189	1.43979e-17	7.05113e-16	chrI	10924240	10925753	-	cpn-4
732	WBGene00000781	16910.7	-0.172145	0.112625	-1.52847	0.126396	0.232749	chrV	11975515	11976756	+	cpr-1
733	WBGene00000782	27.7457	0.517443	0.351563	1.47184	0.141065	0.253426	chrV	16533004	16534110	-	cpr-2
734	WBGene00000783	995.496	0.172556	0.114255	1.51027	0.130976	0.239134	chrV	15296853	15298700	-	cpr-3
738	WBGene00000784	19810.9	-0.158202	0.133671	-1.18351	0.236605	0.371184	chrV	6614674	6615845	+	cpr-4
739	WBGene00000785	48280.9	-0.0487136	0.0596911	-0.816095	0.414446	0.561818	chrV	1132598	1134036	-	cpr-5
740	WBGene00000786	3633.7	-0.632589	0.141078	-4.48395	7.32732e-06	5.69324e-05	chrX	6607203	6609045	+	cpr-6
741	WBGene00000787	1717.03	0.461887	0.0957351	4.82463	1.40264e-06	1.29273e-05	chrI	4446577	4448461	-	cps-6
742	WBGene00000788	1150.54	-1.30553	0.186934	-6.98392	2.87046e-12	7.2725e-11	chrI	2686639	2689493	-	cpz-1
743	WBGene00000789	11873.2	0.0934325	0.0639168	1.46178	0.143801	0.256904	chrV	13381189	13383077	+	cpz-2
744	WBGene00000792	282.97	-0.444856	0.163772	-2.71631	0.00660142	0.0214577	chrX	17402540	17414014	-	crb-1
745	WBGene00000793	1722.87	-0.205097	0.11792	-1.73929	0.0819838	0.167273	chrIII	11657738	11693837	+	crh-1
746	WBGene00000794	649.888	-0.109287	0.116564	-0.937572	0.348465	0.495285	chrI	3481987	3484499	+	crn-1
747	WBGene00000795	464.733	0.0187033	0.122545	0.152625	0.878694	0.924656	chrV	5594615	5595842	+	crn-2
748	WBGene00000796	2066.02	0.0290479	0.0778815	0.372976	0.709166	0.807021	chrII	10588042	10592652	+	crn-3
749	WBGene00000797	56.345	0.869567	0.257634	3.37521	0.000737601	0.00329916	chrX	2255852	2258101	-	crn-4
752	WBGene00000798	548.998	0.440071	0.112611	3.90791	9.30997e-05	0.000545606	chrII	10592752	10593591	+	crn-5
753	WBGene00000799	700.926	-0.149122	0.104181	-1.43137	0.152323	0.268027	chrIII	9367238	9370385	+	crn-6
754	WBGene00000800	5992.12	0.02445	0.0696267	0.351158	0.72547	0.818287	chrI	2623102	2628577	-	cars-1
755	WBGene00000802	106354	0.123721	0.0741837	1.66776	0.0953625	0.187613	chrV	6098993	6100553	-	crt-1
756	WBGene00000803	252.384	-0.846279	0.138818	-6.09634	1.08527e-09	1.82884e-08	chrX	15861294	15865918	-	csb-1
757	WBGene00000804	210.299	0.0472065	0.154823	0.304905	0.760438	0.844639	chrII	13596955	13598068	+	csc-1
758	WBGene00000812	1581.28	0.0671191	0.0794495	0.844802	0.398222	0.545874	chrI	71425	81071	+	csk-1
759	WBGene00000813	1256.4	-0.10773	0.0859137	-1.25393	0.209866	0.339155	chrV	17861368	17870651	-	csn-1
760	WBGene00000814	1634.29	-0.0282761	0.0741149	-0.381517	0.70282	0.80186	chrI	6022660	6026874	+	csn-2
761	WBGene00000815	935.991	-0.0697741	0.0929388	-0.750754	0.452801	0.597984	chrIV	194745	202586	+	csn-3
762	WBGene00000816	1162.75	-0.247685	0.0822833	-3.01014	0.00261124	0.00974651	chrIV	1077463	1087013	-	csn-4
763	WBGene00000817	775.137	-0.0361209	0.0921062	-0.392166	0.694936	0.796786	chrIV	5649533	5651079	+	csn-5
764	WBGene00000818	1275.22	-0.298833	0.0803108	-3.72095	0.000198471	0.0010573	chrIV	13300828	13304145	+	csn-6
765	WBGene00000819	121.587	3.47586	0.310314	11.2011	4.02585e-29	4.51166e-27	chrII	13601204	13605057	+	csp-1
766	WBGene00000820	28.794	0.198157	0.325584	0.608621	0.542776	0.678357	chrIV	6307739	6315719	+	csp-2
767	WBGene00000821	3.42036	0.978054	0.370952	2.63661	0.00837397	0.0261215	chrI	11888501	11890558	-	csp-3
768	WBGene00000822	18263	0.446422	0.06229	7.16683	7.67535e-13	2.12755e-11	chrX	14684877	14688322	+	csq-1
769	WBGene00000829	60071.1	0.21001	0.0702975	2.98745	0.0028132	0.0103857	chrMtDNA	4504	5621	+	ctb-1
770	WBGene00000830	2633.73	-0.193329	0.101777	-1.89953	0.0574942	0.12646	chrII	14303612	14306329	-	ctl-1
771	WBGene00000831	3284.09	0.101892	0.0872716	1.16753	0.242996	0.378557	chrII	14299553	14302083	-	ctl-2
772	WBGene00000832	2506.91	0.00778655	0.0696034	0.11187	0.910926	0.945604	chrI	2606754	2617360	+	ctn-1
773	WBGene00000833	42411.2	-0.201011	0.0577291	-3.48197	0.000497744	0.00233795	chrIII	10214814	10216635	-	cts-1
774	WBGene00000834	3690.19	0.253229	0.0816181	3.10261	0.0019182	0.00749034	chrIII	13439730	13455307	-	cua-1
775	WBGene00000835	809.014	0.0163052	0.107901	0.151113	0.879887	0.925272	chrIII	7860466	7861004	-	cuc-1
776	WBGene00000836	1606.39	-0.726606	0.08758	-8.29648	1.07239e-16	4.73174e-15	chrIII	10471237	10475245	+	cul-1
777	WBGene00000837	2756.65	-0.274616	0.0690167	-3.97899	6.92096e-05	0.000421136	chrIII	13687269	13692683	+	cul-2
778	WBGene00000838	2458.76	-0.301765	0.080679	-3.74031	0.000183791	0.000989187	chrV	177421	184966	+	cul-3
779	WBGene00000839	1432.25	-0.18938	0.0792515	-2.38961	0.0168664	0.046995	chrII	7302101	7305760	+	cul-4
780	WBGene00000840	1198.65	-0.53252	0.104549	-5.09349	3.51522e-07	3.73764e-06	chrV	10179535	10183154	+	cul-5
781	WBGene00000841	193.716	0.624946	0.163181	3.82978	0.000128257	0.000719334	chrIV	12586511	12590428	-	cul-6
785	WBGene00000843	1792.34	0.122719	0.075915	1.61654	0.105979	0.203459	chrI	10398944	10400195	-	cup-2
786	WBGene00000845	366.816	-1.26616	0.154798	-8.17941	2.85237e-16	1.20056e-14	chrIII	7866509	7868732	+	cup-4
787	WBGene00000846	707.767	-0.135154	0.101371	-1.33326	0.182446	0.305813	chrIII	7584181	7591570	+	cup-5
788	WBGene00000851	0.542465	0.0908227	0.207567	0.437558	0.661707	NA	chrII	11269124	11271599	+	cut-1
789	WBGene00000853	13.9339	0.0165202	0.370797	0.0445533	0.964463	0.97828	chrIII	10911460	10916567	+	cut-6
790	WBGene00000854	805.47	-0.0314673	0.102469	-0.307091	0.758774	0.843098	chrIII	7518628	7520845	-	cux-7
791	WBGene00000857	875.07	-0.15861	0.110064	-1.44106	0.149567	0.264537	chrII	130983	133598	-	cwn-1
792	WBGene00000858	299.18	-0.147487	0.131437	-1.12211	0.261816	0.400821	chrIV	10067824	10070251	+	cwn-2
793	WBGene00000859	1.16867	0.326232	0.245165	1.33066	0.1833	NA	chrV	4840619	4841269	-	cwp-1
794	WBGene00000860	4.57353	1.22258	0.395543	3.0909	0.00199548	0.00774904	chrV	4841940	4842567	-	cwp-2
795	WBGene00000861	4.41889	1.19792	0.39462	3.03564	0.00240028	0.00905534	chrV	4842836	4843845	+	cwp-3
796	WBGene00000862	128.063	0.197307	0.23091	0.854475	0.392842	0.540486	chrV	5053619	5056473	+	cwp-4
797	WBGene00000863	442.34	-0.193847	0.126816	-1.52857	0.126371	0.232749	chrIII	9106702	9109272	-	cya-1
798	WBGene00000864	43.5849	-0.0210781	0.27263	-0.077314	0.938374	0.962993	chrII	2022673	2023614	-	cya-2
799	WBGene00000865	379.926	-0.203029	0.125098	-1.62296	0.104598	0.20138	chrIV	10735259	10737177	+	cyb-1
800	WBGene00000866	38.3595	-0.0326506	0.283846	-0.115029	0.908422	0.944161	chrIV	10985985	10987426	+	cyb-2.1
801	WBGene00000867	60.632	0.303319	0.253431	1.19685	0.231366	0.364877	chrI	4114734	4116370	+	cyb-2.2
802	WBGene00000868	675.988	0.0725051	0.113655	0.637942	0.523512	0.661341	chrV	15395696	15397348	+	cyb-3
803	WBGene00000869	17406.1	0.319424	0.0617622	5.17183	2.3181e-07	2.54782e-06	chrI	8022674	8024422	-	cyc-1
804	WBGene00000870	253.764	-0.549554	0.14729	-3.73111	0.000190635	0.00102061	chrII	12980591	12993118	+	cyd-1
805	WBGene00000871	301.071	-0.0524166	0.135934	-0.385602	0.699792	0.799693	chrI	6780806	6784396	+	cye-1
806	WBGene00000872	813.527	0.162234	0.118788	1.36574	0.172019	0.292932	chrIII	7023642	7029203	-	cyk-1
807	WBGene00000874	3248.11	0.0807626	0.0638998	1.26389	0.206268	0.334635	chrIII	6020165	6024659	+	cyk-3
808	WBGene00000875	1229.24	0.0511971	0.0793156	0.645486	0.518612	0.656513	chrIII	13768541	13771242	-	cyk-4
809	WBGene00000876	1251.05	-0.0667574	0.0811337	-0.822808	0.410617	0.558091	chrV	11991011	11993767	-	cyl-1
810	WBGene00000877	5470.49	0.413972	0.0719935	5.75013	8.9175e-09	1.27561e-07	chrV	14356076	14356823	+	cyn-1
811	WBGene00000878	34.323	0.9797	0.297097	3.29757	0.000975245	0.00420061	chrIII	13692668	13693811	+	cyn-2
812	WBGene00000879	8599.59	0.121378	0.0656639	1.84847	0.0645345	0.138477	chrV	15189927	15190926	+	cyn-3
813	WBGene00000880	979.698	-0.300911	0.0974742	-3.08709	0.00202127	0.00783252	chrII	10870779	10872611	-	cyn-4
814	WBGene00000881	21387.1	0.025481	0.0762518	0.334169	0.738252	0.828713	chrI	15040427	15041274	-	cyn-5
815	WBGene00000882	4203.46	-0.640749	0.307482	-2.08386	0.0371731	0.088752	chrIII	773403	774159	+	cyn-6
816	WBGene00000883	25036.2	-0.330347	0.07666	-4.30924	1.63815e-05	0.000117408	chrV	15186582	15187787	-	cyn-7
817	WBGene00000884	912.812	0.0192532	0.0969067	0.198678	0.842515	0.900856	chrX	8911293	8914261	+	cyn-8
823	WBGene00000885	87.4137	0.363749	0.215668	1.68662	0.0916774	0.182304	chrIII	3697821	3699640	-	cyn-9
824	WBGene00000886	213.009	-0.0463967	0.158451	-0.292814	0.769665	0.851469	chrII	6912543	6913365	-	cyn-10
825	WBGene00000887	475.745	0.0269873	0.111795	0.241399	0.809246	0.877768	chrII	8715132	8716281	-	cyn-11
826	WBGene00000888	534.336	0.1583	0.133305	1.1875	0.23503	0.369284	chrIV	7132132	7133217	-	cyn-12
827	WBGene00000889	1283.44	0.296811	0.106239	2.7938	0.00520935	0.0175409	chrIV	17111082	17116666	-	cyn-13
828	WBGene00000890	638.24	-0.18813	0.100457	-1.87274	0.0611039	0.132694	chrI	8646451	8651777	+	sig-7
829	WBGene00000891	1415.86	-0.0887987	0.0803818	-1.10471	0.269285	0.408893	chrI	13566258	13572063	-	cyn-15
830	WBGene00000892	757.815	0.0330626	0.0904191	0.365659	0.714619	0.810748	chrII	12028763	12036742	-	cyn-16
831	WBGene00000893	56.7082	-0.993616	0.356853	-2.78439	0.00536292	0.0180181	chrV	5799673	5805666	+	cyn-17
832	WBGene00000894	1464.12	-0.276684	0.10012	-2.76353	0.00571799	0.0190325	chrII	8226132	8229122	+	dab-1
833	WBGene00000895	410.023	-0.112307	0.142925	-0.785779	0.431997	0.578618	chrIII	816145	821730	+	dac-1
834	WBGene00000896	2101.3	-0.187526	0.083444	-2.24733	0.0246189	0.0640618	chrI	6553481	6554290	-	dad-1
835	WBGene00000897	1187.22	-0.140422	0.0835528	-1.68064	0.0928325	0.183903	chrIV	132416	138076	+	daf-1
836	WBGene00000898	5135.95	-0.0391646	0.0675974	-0.57938	0.562333	0.693078	chrIII	2995487	3040860	-	daf-2
837	WBGene00000899	1165.69	-0.159476	0.0977165	-1.63202	0.102675	0.198766	chrX	817927	825475	-	daf-3
838	WBGene00000900	2348.72	-0.575228	0.0888953	-6.47085	9.74545e-11	1.92871e-09	chrIII	5625014	5632322	+	daf-4
839	WBGene00000901	1953.15	-0.487517	0.103922	-4.69117	2.71648e-06	2.33955e-05	chrII	14033233	14037721	-	daf-5
840	WBGene00000902	152.989	-1.27185	0.283118	-4.49229	7.04614e-06	5.48644e-05	chrX	14888488	14894297	+	daf-6
841	WBGene00000903	754.353	-0.189992	0.135873	-1.3983	0.162022	0.280562	chrIII	811828	813773	+	daf-7
842	WBGene00000904	826.031	-0.0362603	0.103128	-0.351606	0.725134	0.81806	chrI	8584081	8587505	-	daf-8
843	WBGene00000905	484.635	-1.31764	0.216238	-6.09345	1.10506e-09	1.85876e-08	chrX	6196927	6200818	+	daf-9
847	WBGene00000906	168.486	-0.236047	0.162592	-1.45177	0.146565	0.260539	chrIV	9136933	9146210	-	daf-10
848	WBGene00000907	120.385	-0.190983	0.184285	-1.03634	0.300042	0.443539	chrV	11718089	11725652	-	daf-11
849	WBGene00000908	4862.1	-0.133308	0.071192	-1.87251	0.0611357	0.132711	chrX	10644409	10666874	+	daf-12
850	WBGene00000910	786.458	-0.345326	0.159809	-2.16087	0.0307055	0.0763126	chrIV	10250646	10255844	+	daf-14
851	WBGene00000911	4865.92	0.0335692	0.0653541	0.51365	0.607497	0.729499	chrIV	9386208	9394930	+	daf-15
852	WBGene00000912	3247.97	0.106797	0.0980867	1.0888	0.27624	0.417169	chrI	10750343	10776700	+	daf-16
853	WBGene00000913	1041.67	-0.137922	0.0877373	-1.57199	0.115953	0.217914	chrIV	419938	425181	-	daf-18
854	WBGene00000914	724.326	-0.621025	0.130812	-4.74745	2.05993e-06	1.81557e-05	chrII	10157537	10169346	-	daf-19
855	WBGene00000915	198851	0.999626	0.136001	7.35013	1.98021e-13	5.92991e-12	chrV	14684918	14688543	+	hsp-90
856	WBGene00000917	745.763	0.188753	0.0966958	1.95203	0.0509349	0.114528	chrI	332611	337839	+	daf-25
858	WBGene00000920	208.121	-0.590249	0.164333	-3.5918	0.000328406	0.00163238	chrV	19815133	19816451	+	daf-28
860	WBGene00000923	1296.27	0.151586	0.0874907	1.73259	0.0831677	0.169273	chrIV	8290273	8291496	+	daf-31
861	WBGene00000928	5344.61	-0.531867	0.366466	-1.45134	0.146685	0.260626	chrII	4562853	4563546	+	dao-2
862	WBGene00000929	833.731	-0.155817	0.0965417	-1.61398	0.106531	0.204273	chrX	8084210	8086550	-	dao-3
863	WBGene00000930	3.46166	0.96902	0.371905	2.60556	0.0091724	0.02816	chrX	10075288	10076357	+	dao-4
864	WBGene00000931	13736.5	0.188828	0.0792883	2.38154	0.0172406	0.0478188	chrI	10187515	10190896	-	dao-5
865	WBGene00000932	11.2401	0.394157	0.399903	0.98563	0.324315	0.470441	chrIII	9735265	9736057	-	dao-6
866	WBGene00000933	2955.24	0.261575	0.0745646	3.50803	0.000451432	0.00214636	chrII	10581133	10582519	+	dap-3
867	WBGene00000934	221.545	-0.342335	0.16404	-2.0869	0.0368972	0.088243	chrIII	9242914	9246802	+	dat-1
868	WBGene00000935	390.286	-0.254199	0.133532	-1.90365	0.0569561	0.125523	chrII	5456305	5458609	+	daz-1
869	WBGene00000936	416.15	-0.374334	0.120697	-3.10144	0.00192579	0.00751516	chrV	6758135	6760418	+	dbl-1
870	WBGene00000937	610.586	-0.0379392	0.103044	-0.368185	0.712735	0.809169	chrI	6490716	6492727	-	dbr-1
871	WBGene00000938	2328.14	-0.343467	0.102129	-3.36306	0.000770827	0.00342596	chrI	7536204	7542157	-	dcp-66
872	WBGene00000939	3171.76	-0.213443	0.0681797	-3.13059	0.00174457	0.00690085	chrIII	8071916	8080281	-	dcr-1
873	WBGene00000940	519.925	-0.1198	0.111647	-1.07302	0.283261	0.425032	chrV	20087848	20090743	-	dcs-1
874	WBGene00000941	2303.48	0.256441	0.0820504	3.1254	0.00177561	0.00700238	chrIII	1859888	1860381	+	ddp-1
876	WBGene00000942	15736.3	0.383932	0.0595475	6.44749	1.13716e-10	2.23841e-09	chrIV	7085216	7094364	-	deb-1
877	WBGene00000950	112.359	-0.491279	0.195759	-2.5096	0.0120866	0.0355419	chrX	7763187	7774915	+	deg-1
878	WBGene00000951	254.112	-0.324019	0.144287	-2.24566	0.0247257	0.064303	chrV	11412870	11415159	-	deg-3
879	WBGene00000952	231.27	-0.939802	0.162128	-5.79666	6.7648e-09	9.89373e-08	chrX	14271959	14277040	+	del-1
880	WBGene00000953	63.8253	-0.624801	0.257374	-2.4276	0.0151991	0.0430986	chrIV	9636980	9642003	-	del-2
881	WBGene00000955	383.523	-0.0580233	0.118975	-0.487693	0.625767	0.743956	chrV	11415342	11420293	-	des-2
882	WBGene00000958	1586.89	-0.322454	0.0869956	-3.70655	0.000210101	0.00111179	chrX	984581	991456	-	dgk-1
883	WBGene00000959	1511.91	-0.245601	0.0767559	-3.19977	0.00137539	0.00564465	chrX	4494914	4504388	-	dgk-2
884	WBGene00000960	78.5097	-0.97958	0.275081	-3.56106	0.000369364	0.00180696	chrIII	9163077	9168027	+	dgk-3
885	WBGene00000961	1108.56	0.0959617	0.0960673	0.998901	0.317843	0.463226	chrX	10920533	10928998	-	dgn-1
886	WBGene00000962	40716.8	-0.0223938	0.0564662	-0.396587	0.691672	0.79469	chrI	4386785	4401980	+	dhc-1
887	WBGene00000963	2166.82	0.23182	0.111815	2.07325	0.0381494	0.0906209	chrI	7238994	7243967	-	dhp-1
888	WBGene00000964	1421.44	0.0515412	0.0809731	0.636522	0.524436	0.661685	chrIV	9978122	9980770	+	dhp-2
889	WBGene00000965	583.31	-0.11777	0.101374	-1.16173	0.245345	0.381066	chrI	5278803	5281526	-	dhs-1
890	WBGene00000966	333.456	0.088452	0.145133	0.609454	0.542224	0.677955	chrI	5354160	5357026	+	dhs-2
891	WBGene00000967	2458.73	-0.572146	0.0872822	-6.55513	5.55925e-11	1.14747e-09	chrI	8212362	8218361	-	dhs-3
892	WBGene00000968	699.272	0.110889	0.101376	1.09384	0.274025	0.414646	chrI	9647603	9649238	-	dhs-4
893	WBGene00000969	1641.23	-0.17493	0.141009	-1.24056	0.214768	0.345134	chrII	5453847	5455977	+	dhs-5
894	WBGene00000970	2027.6	-0.0794028	0.0748984	-1.06014	0.289081	0.431167	chrII	5617122	5619319	-	dhs-6
896	WBGene00000971	39.3345	-0.244777	0.290596	-0.842327	0.399605	0.547318	chrII	7206990	7208460	-	dhs-7
897	WBGene00000972	207.223	0.174683	0.400167	0.436525	0.662456	0.772886	chrII	14498026	14499755	+	dhs-8
898	WBGene00000973	1613.14	-0.104744	0.080337	-1.30381	0.192298	0.317892	chrIII	5364512	5368045	-	dhs-9
899	WBGene00000974	64.7017	0.172897	0.239442	0.722086	0.470242	0.613426	chrIII	10640828	10642872	-	dhs-11
900	WBGene00000975	1180.25	0.182285	0.0833329	2.18743	0.0287113	0.0722838	chrIV	10145249	10146222	+	dhs-12
901	WBGene00000976	1665.84	0.174543	0.084308	2.0703	0.0384241	0.0911313	chrV	1765311	1771734	-	dhs-13
902	WBGene00000977	428.444	0.483132	0.160407	3.01192	0.002596	0.00969758	chrV	2763981	2765274	-	dhs-14
904	WBGene00000978	331.966	-0.136179	0.125363	-1.08628	0.277354	0.418422	chrV	2768419	2769854	-	dhs-15
905	WBGene00000979	346.216	0.00836413	0.181016	0.0462067	0.963146	0.977541	chrV	5983745	5985473	+	dhs-16
906	WBGene00000980	288.838	-0.277305	0.131828	-2.10354	0.0354189	0.0853784	chrV	6026330	6034923	-	dhs-17
907	WBGene00000981	1031.45	-0.403355	0.100942	-3.9959	6.445e-05	0.000396266	chrV	11045696	11046899	-	dhs-18
908	WBGene00000982	1013.14	-0.197521	0.0969559	-2.03723	0.0416275	0.0974509	chrV	11489050	11490328	-	dhs-19
909	WBGene00000983	922.169	0.277923	0.0977421	2.84343	0.00446302	0.0153591	chrV	11602294	11604563	-	dhs-20
910	WBGene00000984	1073.56	-0.49481	0.12062	-4.10223	4.09196e-05	0.000264688	chrV	12731772	12733645	-	dhs-21
911	WBGene00000985	1731.2	0.0691137	0.0767423	0.900594	0.367804	0.514526	chrV	14420071	14421450	-	dhs-22
912	WBGene00000986	109.282	-0.788506	0.209514	-3.7635	0.000167551	0.0009139	chrV	15381097	15382305	+	dhs-23
913	WBGene00000987	2123.84	0.252667	0.0822326	3.07259	0.00212208	0.008166	chrV	19934795	19946629	-	dhs-24
914	WBGene00000988	7386.63	0.230625	0.0742209	3.10728	0.00188815	0.00738877	chrX	1486473	1489326	+	dhs-25
915	WBGene00000989	7.63944	0.00404955	0.405604	0.00998402	0.992034	0.99503	chrX	3360722	3362493	-	dhs-26
916	WBGene00000990	1215.43	-0.399074	0.12671	-3.14952	0.00163542	0.00653415	chrX	3412876	3414708	-	dhs-27
917	WBGene00000991	11821.5	-0.0208492	0.0675291	-0.308744	0.757516	0.841854	chrX	6818438	6820080	+	dhs-28
918	WBGene00000992	1235.73	-0.640132	0.119606	-5.35201	8.69828e-08	1.04191e-06	chrX	7661891	7664919	-	dhs-29
919	WBGene00000993	851.703	0.0775416	0.0901105	0.860517	0.389504	0.537108	chrX	17230719	17235838	-	dhs-30
920	WBGene00000994	723.162	-0.210952	0.105418	-2.00111	0.0453806	0.104443	chrIV	8692086	8696553	+	dic-1
921	WBGene00000995	814.287	-0.319204	0.118033	-2.70437	0.00684343	0.0220981	chrII	10061287	10074443	-	die-1
933	WBGene00000996	2007.22	-0.215599	0.0960172	-2.24542	0.0247413	0.0643252	chrIV	7551550	7553008	-	dif-1
934	WBGene00000998	115000	0.252263	0.0649606	3.88332	0.00010304	0.00059414	chrIII	6746308	6794764	+	dig-1
935	WBGene00001000	23446.1	0.380574	0.0715657	5.31783	1.05012e-07	1.23679e-06	chrX	8050476	8058220	-	dim-1
936	WBGene00001001	3076.91	-0.0659453	0.0841041	-0.784091	0.432987	0.579526	chrIV	10097196	10106556	+	dis-3
937	WBGene00001002	525.258	-0.157584	0.118233	-1.33283	0.182588	0.305909	chrIII	10245056	10248905	-	div-1
938	WBGene00001005	5801.45	-0.0395618	0.0857083	-0.461587	0.644377	0.758969	chrIII	6462907	6463801	-	dlc-1
939	WBGene00001006	6925.04	-0.0461195	0.0879597	-0.524325	0.600052	0.723413	chrX	5479700	5484941	+	dlg-1
940	WBGene00001007	2298.86	-0.024618	0.0693594	-0.354934	0.722639	0.816354	chrIV	13096958	13098836	-	dli-1
941	WBGene00001008	4512.42	0.0638074	0.0652629	0.977698	0.328224	0.474272	chrI	12565804	12572801	-	dlk-1
942	WBGene00001016	433.849	-0.280679	0.127895	-2.1946	0.0281923	0.0713083	chrII	11778435	11782231	+	dna-2
943	WBGene00001017	4678.81	-0.12319	0.0793258	-1.55296	0.120432	0.22462	chrIV	10926730	10933203	-	dnc-1
944	WBGene00001018	1152.75	-0.204321	0.0948363	-2.15446	0.031204	0.0772362	chrIII	5924394	5925754	-	dnc-2
945	WBGene00001019	1546.66	-0.219562	0.0763337	-2.87634	0.00402318	0.0141086	chrIV	11299008	11304789	+	dnj-1
946	WBGene00001020	973.314	-0.360186	0.11515	-3.12796	0.00176026	0.00695236	chrIV	11312437	11313980	-	dnj-2
947	WBGene00001021	123.538	-0.00396923	0.221327	-0.0179338	0.985692	0.990681	chrV	15068678	15069504	+	dnj-3
948	WBGene00001022	214.031	-0.153239	0.142007	-1.0791	0.280545	0.422067	chrI	5282085	5283944	-	dnj-4
949	WBGene00001023	2339.54	-0.213218	0.0714962	-2.98222	0.00286163	0.0105262	chrII	6853464	6858298	-	dnj-5
950	WBGene00001025	3464.76	-0.1367	0.0798196	-1.71262	0.0867834	0.174917	chrX	7194564	7198291	+	dnj-7
951	WBGene00001026	2309.92	0.0677727	0.0782952	0.865605	0.386707	0.534259	chrII	6594382	6598080	-	dnj-8
952	WBGene00001027	3035.21	0.228407	0.0661201	3.45444	0.000551447	0.00255797	chrII	4852056	4857880	+	dnj-9
953	WBGene00001028	2264.58	0.269388	0.0760843	3.54065	0.000399136	0.00192986	chrIII	8631165	8633549	+	dnj-10
954	WBGene00001029	3267.5	-0.840688	0.119804	-7.01718	2.26392e-12	5.86597e-11	chrIV	6585871	6588186	+	dnj-11
955	WBGene00001030	5918.08	0.190457	0.108436	1.7564	0.0790201	0.162607	chrI	14756858	14759354	+	dnj-12
956	WBGene00001031	16947.1	1.59773	0.131584	12.1422	6.30742e-34	9.36729e-32	chrII	11545563	11547366	+	dnj-13
957	WBGene00001032	641.354	0.0292643	0.109102	0.268229	0.788523	0.863902	chrX	4709772	4711744	-	dnj-14
958	WBGene00001033	360.17	0.093153	0.128909	0.722624	0.469911	0.613244	chrIV	4176388	4178364	+	dnj-15
959	WBGene00001034	1076.8	0.0870555	0.102745	0.847296	0.39683	0.544334	chrIII	4191141	4193427	+	dnj-16
960	WBGene00001035	701.685	0.0276514	0.0990855	0.279066	0.780194	0.858284	chrIII	13390850	13393339	-	dnj-17
961	WBGene00001036	295.67	0.172307	0.140738	1.22431	0.220835	0.352252	chrIII	4697987	4699453	+	dnj-18
962	WBGene00001037	8587.31	0.128733	0.0786717	1.63633	0.10177	0.197517	chrV	5503033	5504856	-	dnj-19
963	WBGene00001038	4439.42	0.279165	0.063869	4.37091	1.2373e-05	9.10259e-05	chrII	9617426	9624176	-	dnj-20
964	WBGene00001039	413.835	0.259439	0.120172	2.1589	0.0308581	0.0765926	chrI	5676827	5677646	+	dnj-21
965	WBGene00001040	210.55	-0.0141593	0.142174	-0.0995916	0.920669	0.951936	chrV	8461096	8462116	-	dnj-22
966	WBGene00001041	676.216	-0.0749608	0.0981822	-0.763487	0.445173	0.590215	chrII	9107382	9108600	-	dnj-23
967	WBGene00001042	1187.08	0.00966726	0.0859022	0.112538	0.910397	0.945316	chrIII	5415556	5419565	-	dnj-24
968	WBGene00001043	1655.86	-0.0276386	0.0810122	-0.341166	0.732978	0.824313	chrV	20729948	20744385	-	dnj-25
969	WBGene00001044	33.0945	0.246725	0.300456	0.821169	0.41155	0.559151	chrIV	12251111	12252663	-	dnj-26
970	WBGene00001045	1897.24	-0.471444	0.138868	-3.3949	0.00068654	0.00309502	chrI	11877803	11887278	+	dnj-27
971	WBGene00001046	181.616	0.260146	0.160666	1.61917	0.105411	0.202603	chrI	2996401	3001382	+	dnj-28
972	WBGene00001047	6593.03	-0.0909205	0.0735776	-1.23571	0.216567	0.347385	chrI	14104429	14113179	-	dnj-29
973	WBGene00001048	601.739	0.0486261	0.119767	0.406006	0.684738	0.789056	chrI	2718027	2721475	-	dnj-30
974	WBGene00001049	381.989	-0.450772	0.128899	-3.49708	0.000470376	0.00222369	chrI	15017283	15023017	-	dog-1
975	WBGene00001050	330.704	-0.314337	0.124952	-2.51567	0.0118807	0.0350435	chrI	5003351	5005163	+	dom-3
976	WBGene00001051	318.312	-0.042828	0.135027	-0.31718	0.751107	0.837533	chrIV	8513919	8514725	+	cks-1
977	WBGene00001052	433.995	-0.578589	0.118203	-4.89489	9.83598e-07	9.41686e-06	chrX	4411359	4416079	-	dop-1
978	WBGene00001053	422.328	-0.646243	0.118557	-5.45092	5.01097e-08	6.2492e-07	chrV	9608562	9614942	+	dop-2
979	WBGene00001054	706.193	-0.432086	0.120246	-3.59336	0.000326447	0.00162529	chrV	15471335	15476122	+	dpf-1
980	WBGene00001055	977.9	-0.575588	0.0999264	-5.76012	8.40541e-09	1.21185e-07	chrX	14831824	14838241	+	dpf-2
981	WBGene00001056	4431.47	0.0508883	0.0718108	0.708644	0.478545	0.620147	chrI	6838354	6843343	+	dpf-3
982	WBGene00001057	2584.76	0.112716	0.0783331	1.43893	0.15017	0.265395	chrIII	5859308	5861907	+	dpf-4
983	WBGene00001058	3423.34	0.144392	0.0747101	1.9327	0.0532729	0.118603	chrIV	4802702	4806586	-	dpf-5
984	WBGene00001059	442.641	-1.39813	0.21305	-6.56243	5.29376e-11	1.10263e-09	chrIII	8038241	8041374	+	dpf-6
985	WBGene00001060	837.728	-0.0953354	0.0967466	-0.985414	0.324421	0.47052	chrIV	4799388	4802592	-	dpf-7
986	WBGene00001061	626.328	-0.23114	0.110225	-2.09698	0.035995	0.0865614	chrII	9169910	9172565	+	dpl-1
987	WBGene00001062	2.93188	0.265121	0.377895	0.701575	0.482944	0.624234	chrV	13940139	13942182	-	dpr-1
988	WBGene00001063	22.9548	0.140401	0.363596	0.386146	0.699388	0.799434	chrIII	2035036	2048007	-	dpy-1
989	WBGene00001064	3774.8	-0.668566	0.376739	-1.77462	0.0759614	0.157573	chrII	6714292	6715971	+	dpy-2
990	WBGene00001065	3308.2	-0.540512	0.393015	-1.37529	0.16904	0.289397	chrX	2144605	2145647	-	dpy-3
991	WBGene00001066	1050.3	-0.436946	0.36945	-1.18269	0.23693	0.371538	chrIV	14985543	14986784	-	dpy-4
992	WBGene00001067	1314.23	-0.243229	0.371548	-0.654638	0.512701	0.651242	chrI	5432158	5433054	-	dpy-5
993	WBGene00001068	11784	-0.416373	0.136612	-3.04786	0.00230478	0.00875472	chrX	8450381	8455640	-	dpy-6
994	WBGene00001069	3927.43	-0.689734	0.364721	-1.89113	0.0586072	0.128397	chrX	7536417	7537792	-	dpy-7
995	WBGene00001070	2256.79	-0.500844	0.402599	-1.24403	0.213489	0.343474	chrX	5148804	5150476	-	dpy-8
996	WBGene00001071	3970.3	-0.785158	0.35059	-2.23953	0.0251213	0.0650095	chrIV	257384	259204	-	dpy-9
997	WBGene00001072	2714.86	-0.673143	0.360623	-1.86661	0.0619558	0.134109	chrII	6710156	6711866	-	dpy-10
998	WBGene00001073	4252.72	-0.64948	0.136316	-4.7645	1.89318e-06	1.68286e-05	chrV	6511588	6515240	-	dpy-11
999	WBGene00001074	1295.14	-0.358971	0.37476	-0.957868	0.338129	0.484782	chrIV	4235614	4236710	+	dpy-13
1000	WBGene00001075	64.6636	3.62498	0.323907	11.1914	4.4926e-29	4.97372e-27	chrI	6843589	6845134	+	dpy-14
1001	WBGene00001076	820.533	4.26718	0.157474	27.0977	1.04764e-161	1.36695e-158	chrIII	5107330	5108497	+	dpy-17
1002	WBGene00001077	4258.7	-0.321907	0.12	-2.68256	0.0073062	0.0233408	chrIII	11372886	11377980	-	dpy-18
1004	WBGene00001078	726.65	-0.345473	0.102101	-3.38362	0.000715358	0.00321383	chrIII	8659872	8667482	-	dpy-19
1005	WBGene00001079	259.443	-0.824255	0.378387	-2.17834	0.0293808	0.0736313	chrIV	11696443	11699895	-	dpy-20
1006	WBGene00001080	4524.89	0.122764	0.0908921	1.35065	0.176807	0.298861	chrV	17936332	17949184	-	dpy-21
1007	WBGene00001081	6701.26	-0.253322	0.0647992	-3.90934	9.25478e-05	0.000542719	chrX	9810202	9822273	-	dpy-22
1008	WBGene00001082	1610.76	-0.109636	0.0766269	-1.43078	0.152494	0.268183	chrX	4389365	4393796	+	dpy-23
1009	WBGene00001085	2406.33	-0.247151	0.0721651	-3.4248	0.000615249	0.00281673	chrIV	12445801	12451299	-	dpy-26
1010	WBGene00001086	4806.18	-0.253283	0.0635932	-3.98286	6.80903e-05	0.000415433	chrIII	3813519	3819679	-	dpy-27
1011	WBGene00001087	2029.59	0.214812	0.158429	1.35589	0.175135	0.296688	chrIII	10763131	10777343	+	dpy-28
1012	WBGene00001088	2048.3	0.0287285	0.0925118	0.310539	0.756151	0.841054	chrV	12191519	12192211	+	dpy-30
1013	WBGene00001089	7043.67	-0.997425	0.121165	-8.23197	1.84154e-16	7.93384e-15	chrV	6533614	6546491	-	dre-1
1014	WBGene00001090	1574.24	-0.483079	0.0743072	-6.5011	7.97329e-11	1.59702e-09	chrIV	6607376	6613353	-	drh-1
1015	WBGene00001092	243.137	-0.00980117	0.141503	-0.0692645	0.944779	0.966905	chrIII	13342684	13343337	+	dro-1
1016	WBGene00001093	3260.15	-0.350276	0.0779231	-4.49515	6.95223e-06	5.41793e-05	chrIV	5537981	5541365	+	drp-1
1017	WBGene00001094	9530.32	0.154867	0.0627436	2.46825	0.0135774	0.0392124	chrIII	9489176	9491236	-	dars-1
1018	WBGene00001095	735.426	0.142731	0.101753	1.40271	0.160702	0.278912	chrV	12048745	12052182	+	dars-2
1019	WBGene00001096	23.6376	0.900879	0.345396	2.60825	0.00910077	0.0279777	chrX	15031353	15034541	-	dsc-1
1020	WBGene00001099	5623.96	-0.207692	0.0700655	-2.96425	0.00303418	0.0110851	chrIV	315056	320605	-	dsc-4
1021	WBGene00001101	1785.55	-0.26104	0.0872685	-2.99123	0.00277861	0.0102732	chrII	5214441	5225377	-	dsh-1
1022	WBGene00001102	477.82	0.267661	0.110867	2.41426	0.0157672	0.0444956	chrII	5078235	5081161	-	dsh-2
1023	WBGene00001103	6.76989	0.842513	0.405329	2.07859	0.0376551	0.0896449	chrIV	1207255	1208102	-	dsl-1
1025	WBGene00001104	13.0005	0.543299	0.382366	1.42089	0.15535	0.271869	chrIV	1202651	1204970	-	dsl-2
1026	WBGene00001105	14.2023	0.80226	0.380136	2.11046	0.034819	0.0842443	chrIV	1610236	1612915	+	dsl-3
1027	WBGene00001106	2.24569	0.229401	0.352948	0.649956	0.51572	0.653895	chrX	14090389	14095490	+	dsl-4
1028	WBGene00001107	64.8269	-0.0214221	0.253824	-0.0843972	0.932741	0.959541	chrIV	11619502	11620938	-	dsl-5
1029	WBGene00001108	4.04249	0.438213	0.379439	1.1549	0.248133	0.384579	chrIV	11396788	11398317	-	dsl-6
1030	WBGene00001109	18.2633	-0.144188	0.356218	-0.404776	0.685642	0.789848	chrV	12993180	12994822	+	dsl-7
1031	WBGene00001110	156.001	-0.111234	0.175474	-0.633909	0.52614	0.663377	chrV	11554635	11558127	+	duo-1
1032	WBGene00001112	764.206	-0.182252	0.114961	-1.58533	0.112892	0.213566	chrI	10464328	10471056	-	duo-3
1033	WBGene00001113	2539.4	0.370871	0.0971569	3.81724	0.000134953	0.000752961	chrIV	9921955	9928223	-	dur-1
1034	WBGene00001115	707.679	-0.441356	0.108361	-4.07301	4.64086e-05	0.000296934	chrI	1483083	1490494	+	dyb-1
1035	WBGene00001116	1263.72	-0.375437	0.0944673	-3.97425	7.06011e-05	0.000428036	chrX	14049535	14063884	+	dyc-1
1036	WBGene00001117	120.473	-0.469695	0.187742	-2.50181	0.0123559	0.0361823	chrI	4989568	4994675	-	dyf-1
1037	WBGene00001118	328.816	-0.389254	0.137604	-2.8288	0.00467227	0.0159649	chrIII	13674917	13686445	-	dyf-2
1038	WBGene00001119	74.1817	-0.553161	0.222045	-2.49121	0.0127308	0.0370959	chrIV	3396581	3399123	-	dyf-3
1039	WBGene00001121	79.7361	-0.245193	0.212827	-1.15207	0.24929	0.386013	chrI	9359075	9364180	+	dyf-5
1040	WBGene00001122	122.749	-0.726925	0.184257	-3.94518	7.97414e-05	0.000476811	chrX	10379693	10386508	-	dyf-6
1048	WBGene00001123	30.9459	-0.920481	0.317663	-2.89766	0.00375953	0.0133132	chrX	9698678	9701679	+	dyf-7
1049	WBGene00001127	45.78	-1.16129	0.291536	-3.98335	6.79493e-05	0.000414711	chrX	763769	766713	+	dyf-11
1050	WBGene00001129	74.8253	0.329581	0.229847	1.43391	0.151597	0.267197	chrII	7168817	7171355	-	dyf-13
1051	WBGene00001130	3599.62	0.0675603	0.0905097	0.746443	0.4554	0.600158	chrX	15568890	15573693	+	dyn-1
1052	WBGene00001131	18261.3	0.138271	0.061832	2.23624	0.0253358	0.0654237	chrI	11526918	11557851	-	dys-1
1053	WBGene00001132	11528	0.381012	0.0685788	5.55583	2.76303e-08	3.62068e-07	chrIV	8852500	8862228	+	alp-1
1054	WBGene00001133	152.836	0.510393	0.174432	2.92603	0.00343318	0.0122968	chrII	14166882	14171648	-	eat-2
1055	WBGene00001134	4903.38	0.0703008	0.071818	0.978875	0.327642	0.473724	chrII	9324874	9329665	+	eat-3
1056	WBGene00001135	578.257	-0.734139	0.122602	-5.988	2.12439e-09	3.43114e-08	chrIII	9136916	9141822	+	eat-4
1057	WBGene00001136	164.043	-0.00386646	0.16208	-0.0238552	0.980968	0.987945	chrI	7308603	7311939	-	eat-5
1058	WBGene00001137	78436.5	0.34422	0.0782248	4.4004	1.0805e-05	8.06598e-05	chrV	13126414	13129995	-	eat-6
1059	WBGene00001145	1429.89	-0.469255	0.0840186	-5.58512	2.33533e-08	3.10251e-07	chrI	9722550	9726282	+	eat-16
1060	WBGene00001147	84.5523	-0.387721	0.243289	-1.59367	0.111011	0.21075	chrI	14391960	14395241	+	eat-18
1061	WBGene00001148	569.684	-0.496798	0.148087	-3.35477	0.000794306	0.00351492	chrX	15516655	15524020	+	eat-20
1062	WBGene00001149	6891.52	0.322807	0.0829068	3.89361	9.87625e-05	0.000575041	chrX	12877480	12880328	+	bcat-1
1063	WBGene00001150	38.923	-0.0271707	0.289395	-0.0938879	0.925198	0.954998	chrV	15357696	15360738	-	ech-1.1
1064	WBGene00001151	953.513	0.0935566	0.0869841	1.07556	0.282124	0.423813	chrIV	11854828	11856376	-	ech-2
1065	WBGene00001152	242.374	0.0595149	0.138187	0.430684	0.666698	0.77615	chrV	8022218	8023308	+	ech-3
1066	WBGene00001153	1887.74	-0.124771	0.0863298	-1.44529	0.148377	0.262737	chrII	10821015	10822443	+	ech-4
1067	WBGene00001154	2486.64	0.239854	0.0796946	3.00967	0.00261532	0.00975699	chrIV	797023	799922	+	ech-5
1068	WBGene00001155	20877	0.308462	0.0744983	4.14053	3.46509e-05	0.000228426	chrIII	9751440	9752922	-	ech-6
1072	WBGene00001156	4020.11	0.317804	0.0894028	3.55475	0.000378345	0.00184496	chrI	14367608	14369773	-	ech-7
1073	WBGene00001157	398.137	0.162289	0.115117	1.40978	0.158606	0.275903	chrIV	10236626	10239176	-	ech-8
1074	WBGene00001158	178.092	1.08809	0.244252	4.45478	8.39801e-06	6.4484e-05	chrIV	10233321	10235329	-	ech-9
1075	WBGene00001159	1917.58	-0.636971	0.129824	-4.90644	9.27456e-07	8.92145e-06	chrII	8346690	8350557	+	eff-1
1076	WBGene00001160	3577.68	0.975827	0.163896	5.95394	2.61761e-09	4.15068e-08	chrIII	6164909	6168547	-	efk-1
1077	WBGene00001161	396.441	-0.167314	0.127419	-1.31311	0.189147	0.313877	chrV	16958657	16965675	-	efl-1
1078	WBGene00001162	326.765	0.246152	0.123977	1.98547	0.0470926	0.107544	chrII	13406160	13411483	+	efl-2
1079	WBGene00001163	708.15	-0.373221	0.10369	-3.59938	0.000318976	0.00159294	chrIV	10576350	10578288	+	efn-2
1080	WBGene00001164	4.6853	1.33152	0.393655	3.38246	0.000718387	0.00322665	chrX	13475964	13477456	-	efn-3
1081	WBGene00001165	193.022	-0.883537	0.159685	-5.53301	3.14788e-08	4.08713e-07	chrIV	559234	568076	+	efn-4
1082	WBGene00001166	8340.33	-0.124983	0.0645862	-1.93514	0.0529733	0.118051	chrIII	6009550	6012839	+	eftu-2
1083	WBGene00001167	373722	0.328925	0.0650564	5.056	4.28136e-07	4.48181e-06	chrI	9163531	9166952	+	eef-2
1084	WBGene00001168	440887	0.4815	0.0819815	5.87328	4.27246e-09	6.53644e-08	chrIII	6970026	6972003	-	eef-1A.1
1093	WBGene00001169	60028.1	-0.029257	0.0879064	-0.33282	0.73927	0.829534	chrX	7823652	7825769	+	eef-1A.2
1126	WBGene00001170	10.3145	0.53785	0.401708	1.33891	0.180601	0.303332	chrV	14431310	14432359	-	egl-1
1127	WBGene00001171	687.035	-0.220451	0.116624	-1.89028	0.058721	0.12857	chrV	1288841	1299332	-	egl-2
1128	WBGene00001172	6766.8	-0.364579	0.0834538	-4.36863	1.25027e-05	9.19065e-05	chrV	10169197	10173753	-	egl-3
1129	WBGene00001173	11071.1	-0.0561771	0.0761146	-0.73806	0.460478	0.604669	chrIV	1847968	1880587	+	egl-4
1130	WBGene00001174	178.182	-0.495834	0.21626	-2.29277	0.0218613	0.0581281	chrIII	7814380	7817127	+	egl-5
1131	WBGene00001175	45.789	-0.839611	0.272612	-3.07988	0.00207087	0.00799359	chrX	5931122	5934532	+	egl-6
1132	WBGene00001177	7608.18	-0.230116	0.0707803	-3.25113	0.00114946	0.00483046	chrV	20825	43697	+	egl-8
1133	WBGene00001178	1433.52	-0.792808	0.121345	-6.5335	6.42504e-11	1.31135e-09	chrV	10468411	10476952	+	egl-9
1134	WBGene00001179	1937.11	-0.310646	0.0801349	-3.87654	0.000105952	0.000608435	chrV	12453955	12463008	-	egl-10
1135	WBGene00001182	446.059	-0.0143676	0.114531	-0.125447	0.90017	0.939193	chrX	5663837	5674060	+	egl-13
1136	WBGene00001184	1594.22	-0.147381	0.0953535	-1.54563	0.122194	0.226957	chrX	11016410	11023421	+	egl-15
1137	WBGene00001185	30.2418	-0.305399	0.302271	-1.01035	0.312329	0.4569	chrX	489695	492273	+	egl-17
1138	WBGene00001186	706.863	-0.795728	0.140181	-5.67645	1.37516e-08	1.90882e-07	chrIV	1902323	1917841	+	egl-18
1139	WBGene00001187	5728.47	0.352231	0.0679295	5.18524	2.15738e-07	2.38408e-06	chrIV	7405460	7418733	+	egl-19
1140	WBGene00001188	638.372	-0.564943	0.158442	-3.56562	0.000362997	0.00177914	chrIV	9812444	9815526	-	egl-20
1141	WBGene00001189	5205.76	-0.378134	0.0926564	-4.08104	4.48356e-05	0.000287776	chrIV	10478450	10481844	-	egl-21
1142	WBGene00001190	468.938	-0.470944	0.121697	-3.86982	0.000108917	0.000622718	chrIV	13989094	14012026	+	egl-23
1143	WBGene00001193	230.64	0.264165	0.157158	1.68088	0.092786	0.183831	chrII	69654	71279	+	egl-26
1144	WBGene00001194	4512.71	-0.114082	0.0964598	-1.18269	0.236933	0.371538	chrII	6835021	6847906	+	egl-27
1145	WBGene00001196	3439.94	0.1076	0.0784431	1.37169	0.17016	0.290496	chrI	1835631	1841936	+	egl-30
1146	WBGene00001202	114.974	-0.681267	0.188512	-3.61393	0.000301593	0.00151685	chrX	10734326	10744355	+	egl-36
1147	WBGene00001204	72.5843	-0.765936	0.236567	-3.23771	0.00120494	0.00502526	chrIV	10106917	10110412	-	egl-38
1148	WBGene00001207	614.292	-0.638964	0.112069	-5.70151	1.18748e-08	1.66475e-07	chrII	9955185	9962344	+	egl-43
1149	WBGene00001208	989.687	-0.578032	0.0854	-6.76853	1.30097e-11	2.98552e-10	chrII	5928830	5940815	+	egl-44
1150	WBGene00001209	19945.4	0.0809735	0.0658372	1.22991	0.218732	0.350121	chrIII	7824377	7828626	-	egl-45
1151	WBGene00001210	30.0491	-0.881825	0.321652	-2.74155	0.00611501	0.0201484	chrV	6679317	6681573	-	egl-46
1152	WBGene00001211	66.2224	-0.320838	0.234958	-1.36551	0.172091	0.292972	chrV	9899587	9907644	+	egl-47
1153	WBGene00001214	890.177	-0.344728	0.0930228	-3.70584	0.000210688	0.00111458	chrI	7650418	7656336	-	ego-1
1154	WBGene00001215	1941.07	-0.141908	0.0976645	-1.45302	0.146218	0.260201	chrI	11400612	11416427	-	ego-2
1155	WBGene00001223	0.159552	0.0481748	0.155136	0.310532	0.756156	NA	chrIV	5416906	5419195	-	ehn-3
1156	WBGene00001224	1727.7	-0.00523304	0.0848253	-0.061692	0.950808	0.97004	chrII	5820712	5823862	+	ehs-1
1157	WBGene00001225	15130.5	0.433739	0.0824057	5.26346	1.41368e-07	1.62413e-06	chrII	14795404	14798224	+	eif-3.B
1158	WBGene00001226	18435.1	0.16963	0.0637411	2.66123	0.00778563	0.024597	chrI	9976393	9979662	-	eif-3.C
1159	WBGene00001227	10312.4	0.263087	0.0636166	4.13552	3.54159e-05	0.000232815	chrIII	8969638	8971578	-	eif-3.D
1160	WBGene00001228	7779.07	0.24545	0.0604979	4.05717	4.96701e-05	0.000314934	chrI	10640465	10642281	-	eif-3.E
1161	WBGene00001229	6338.54	0.229057	0.0613122	3.73592	0.000187031	0.00100308	chrII	9331643	9333925	+	eif-3.F
1162	WBGene00001230	4453.99	0.208752	0.0677573	3.08088	0.00206391	0.00796902	chrII	8442765	8444239	+	eif-3.G
1168	WBGene00001231	5266.62	0.197025	0.0713758	2.76038	0.00577333	0.0191831	chrI	4444719	4446598	+	eif-3.H
1169	WBGene00001232	8127.08	0.351805	0.0720139	4.88524	1.03303e-06	9.81296e-06	chrI	2485867	2489780	+	eif-3.I
1170	WBGene00001233	3185.81	0.104426	0.0723123	1.4441	0.14871	0.263251	chrV	12954002	12955229	+	eif-3.K
1171	WBGene00001234	3600.33	0.194236	0.0751419	2.58492	0.0097401	0.0295896	chrI	12968921	12970238	+	eif-6
1172	WBGene00001235	732.245	-0.0221118	0.0936803	-0.236034	0.813406	0.88066	chrIII	11718834	11719450	-	elb-1
1173	WBGene00001236	1075.27	0.148469	0.0881232	1.68479	0.0920286	0.182707	chrIII	1415152	1417188	-	elc-1
1174	WBGene00001237	9.76613	-0.819374	0.396365	-2.06722	0.0387131	0.0916738	chrX	1777355	1778146	-	elc-2
1175	WBGene00001239	14229	-0.118718	0.0684617	-1.73408	0.0829033	0.168848	chrIV	9526359	9528350	+	elo-1
1176	WBGene00001240	15059.8	0.139724	0.0625833	2.23262	0.0255743	0.0658484	chrIV	17466060	17467408	-	elo-2
1177	WBGene00001241	2314.14	0.0181867	0.0804868	0.225959	0.821233	0.886088	chrIV	7237722	7239976	+	elo-3
1178	WBGene00001242	114.717	-0.90637	0.247254	-3.66575	0.000246619	0.00128092	chrIII	9332269	9334274	-	elo-4
1179	WBGene00001243	10881	-0.274324	0.0709069	-3.86879	0.000109377	0.000624956	chrIV	5374598	5377137	-	elo-5
1180	WBGene00001244	17971.2	0.102361	0.0697312	1.46793	0.142122	0.254756	chrIV	5386629	5388559	-	elo-6
1181	WBGene00001245	17.4692	1.85983	0.373743	4.97623	6.48337e-07	6.45053e-06	chrIV	9529947	9531378	+	elo-7
1182	WBGene00001246	5.85468	0.0832076	0.387416	0.214776	0.829942	0.892229	chrIII	11230378	11232164	-	elo-8
1183	WBGene00001247	690.772	-0.0779696	0.11198	-0.696284	0.486251	0.62755	chrII	14959675	14964108	-	elo-9
1184	WBGene00001248	494.667	-0.187345	0.111828	-1.67529	0.0938764	0.185468	chrV	20764955	20770161	-	elp-1
1185	WBGene00001249	777.985	-0.595119	0.14352	-4.14658	3.37471e-05	0.000223193	chrIV	9614970	9620140	+	elt-1
1186	WBGene00001250	1043.29	0.64063	0.101193	6.33076	2.43951e-10	4.53331e-09	chrX	10481240	10483446	+	elt-2
1187	WBGene00001251	671.058	-0.0182411	0.122602	-0.148784	0.881724	0.926351	chrX	13934883	13941247	+	elt-3
1188	WBGene00001252	14.5969	0.150292	0.377586	0.398032	0.690606	0.794065	chrX	10475527	10475959	+	elt-4
1189	WBGene00001253	343.159	-0.964161	0.149395	-6.45376	1.09109e-10	2.15237e-09	chrIV	1917854	1921644	+	elt-6
1190	WBGene00001258	5460.57	-0.17917	0.0748778	-2.39284	0.0167186	0.0466614	chrV	18860287	18894974	-	emb-4
1205	WBGene00001259	7289.92	0.0864844	0.0638034	1.35548	0.175264	0.296851	chrIII	4715293	4720670	-	emb-5
1206	WBGene00001262	4054.16	-0.526166	0.0821989	-6.40113	1.54227e-10	2.95311e-09	chrIII	5196678	5199688	-	emb-8
1207	WBGene00001263	79085.4	0.496087	0.0618649	8.01888	1.06713e-15	4.13883e-14	chrIII	9336881	9344447	-	emb-9
1208	WBGene00001281	733.576	-0.45761	0.100048	-4.57392	4.78689e-06	3.88632e-05	chrII	8159865	8162170	-	emb-27
1209	WBGene00001284	2068.34	-0.245888	0.0757192	-3.24737	0.00116476	0.00488374	chrIII	9435083	9441539	-	emb-30
1210	WBGene00001303	6273.13	-0.246034	0.0929654	-2.64651	0.0081328	0.0254692	chrV	10896658	10897143	-	emo-1
1212	WBGene00001309	692.727	0.164964	0.119137	1.38466	0.166156	0.285932	chrI	1842445	1843227	+	emr-1
1213	WBGene00001310	10.511	1.48134	0.405329	3.65466	0.000257519	0.00132693	chrV	13985137	13987072	+	end-1
1214	WBGene00001311	22.0149	2.68707	0.389961	6.89061	5.55528e-12	1.35666e-10	chrV	14014701	14015850	+	end-3
1216	WBGene00001320	1304.33	0.0818321	0.0983489	0.832059	0.405375	0.5529	chrIV	11653422	11655470	-	ent-1
1222	WBGene00001324	939.364	-0.319485	0.0987436	-3.2355	0.00121428	0.00505499	chrIV	4793202	4799378	-	eor-1
1223	WBGene00001325	628.951	-0.458924	0.0975338	-4.70528	2.53518e-06	2.19687e-05	chrX	14603017	14608655	+	eor-2
1224	WBGene00001328	35428.2	0.360346	0.0595398	6.05218	1.42895e-09	2.36009e-08	chrIV	10666827	10679289	+	epi-1
1225	WBGene00001329	2225.25	-0.128584	0.0969324	-1.32653	0.184664	0.308314	chrX	14815828	14818507	-	epn-1
1226	WBGene00001330	9785.89	0.26217	0.0658514	3.98123	6.85587e-05	0.000417733	chrIV	14879490	14900652	+	eps-8
1227	WBGene00001331	2877.91	-0.629398	0.085119	-7.39432	1.42131e-13	4.31997e-12	chrX	10156858	10160438	-	erd-2
1228	WBGene00001332	454.773	-0.354954	0.111302	-3.18912	0.00142708	0.00581577	chrIV	415635	419958	-	eri-1
1229	WBGene00001333	9190.13	0.017431	0.061131	0.285142	0.775535	0.855352	chrI	5284062	5291604	-	erm-1
1230	WBGene00001334	1522.56	-0.153728	0.0783632	-1.96174	0.0497932	0.112376	chrI	14663209	14674822	+	ero-1
1231	WBGene00001335	521.898	-0.188291	0.113294	-1.66196	0.09652	0.189564	chrX	3800045	3802771	-	F35A5.8
1232	WBGene00001336	7281.76	0.125035	0.0833873	1.49944	0.133759	0.243073	chrIV	15008503	15013183	-	qars-1
1233	WBGene00001337	13929.7	0.179494	0.0566227	3.17	0.00152441	0.00615798	chrI	10336395	10341178	+	ears-1
1234	WBGene00001338	638.459	-0.23412	0.127607	-1.8347	0.0665494	0.141784	chrIV	388686	390468	-	ears-2
1235	WBGene00001340	3203.14	-0.389304	0.101219	-3.84616	0.000119982	0.000678131	chrII	162374	170628	+	etr-1
1236	WBGene00001345	829.381	-0.453073	0.124505	-3.63899	0.000273712	0.00139389	chrV	6003601	6016087	+	fos-1
1237	WBGene00001352	2710.84	-0.0871304	0.0731421	-1.19125	0.233556	0.367378	chrIII	4303096	4313128	-	evl-14
1238	WBGene00001358	215.913	-0.362467	0.147729	-2.45359	0.0141437	0.0405848	chrII	8444307	8445177	+	evl-20
1240	WBGene00001362	176.893	0.208578	0.155882	1.33805	0.180882	0.303664	chrX	15470795	15477402	-	exc-1
1241	WBGene00001365	843.468	0.0679735	0.0908442	0.748243	0.454314	0.599288	chrI	14511431	14518719	-	exc-4
1242	WBGene00001366	1660.67	-0.43402	0.0872075	-4.97686	6.46235e-07	6.44005e-06	chrIV	8799089	8813539	-	exc-5
1243	WBGene00001368	549.994	-0.730078	0.105988	-6.88831	5.646e-12	1.37331e-10	chrII	9575971	9581490	+	exc-7
1244	WBGene00001371	444.478	0.469908	0.1164	4.037	5.41386e-05	0.000339845	chrII	14412201	14413516	-	exl-1
1245	WBGene00001372	364.947	0.242566	0.125088	1.93917	0.0524812	0.117197	chrI	11907571	11909280	-	exo-3
1246	WBGene00001373	186.314	0.28551	0.193861	1.47276	0.140817	0.253005	chrII	6157167	6161094	-	exp-1
1247	WBGene00001374	691.32	-0.169262	0.102112	-1.6576	0.0973973	0.190835	chrV	6139836	6143548	+	exp-2
1248	WBGene00001377	104.422	-0.764805	0.21751	-3.51619	0.000437796	0.00208914	chrI	14220783	14231360	-	eya-1
1249	WBGene00001385	54426.9	0.350037	0.0573009	6.10875	1.00418e-09	1.70476e-08	chrIII	9080371	9081179	-	far-1
1250	WBGene00001386	12960.3	0.290949	0.0884696	3.28869	0.00100653	0.00431605	chrIII	9081679	9082511	+	far-2
1251	WBGene00001387	12.607	-0.29452	0.393189	-0.749054	0.453825	0.598853	chrV	12996787	12997524	-	far-3
1252	WBGene00001388	3.08626	0.0904775	0.367595	0.246134	0.805579	0.875402	chrV	12998427	12999659	-	far-4
1253	WBGene00001389	434.668	-0.56066	0.152548	-3.6753	0.000237568	0.00124061	chrV	12995569	12996836	+	far-5
1254	WBGene00001390	522.01	0.359747	0.114703	3.13633	0.00171078	0.00678915	chrIV	13328359	13329497	+	far-6
1255	WBGene00001391	614.371	-0.307858	0.116938	-2.63266	0.00847196	0.0263551	chrII	319785	321445	+	far-7
1256	WBGene00001392	3595.72	-0.00195952	0.0811244	-0.0241545	0.980729	0.987759	chrIII	842935	843802	+	far-8
1257	WBGene00001393	15553.9	0.22833	0.0637945	3.57914	0.000344729	0.00170056	chrIV	13315644	13318811	+	fat-1
1258	WBGene00001394	25576	0.322753	0.0616262	5.23727	1.6297e-07	1.85251e-06	chrIV	13323850	13326394	+	fat-2
1259	WBGene00001395	8266.16	-0.0177803	0.0706402	-0.251702	0.801271	0.872902	chrIV	9803023	9806119	+	fat-3
1260	WBGene00001396	10392.5	0.0875212	0.099293	0.881444	0.378078	0.524998	chrIV	9799429	9802638	+	fat-4
1261	WBGene00001397	66.4296	0.665245	0.290663	2.28872	0.0220958	0.0586322	chrV	17725004	17726818	+	fat-5
1262	WBGene00001398	17501	0.63732	0.248429	2.5654	0.0103056	0.0310444	chrIV	11913691	11915796	-	fat-6
1263	WBGene00001399	60.3707	-0.186135	0.261449	-0.711934	0.476505	0.618468	chrV	7151353	7153146	-	fat-7
1264	WBGene00001400	44.1412	-0.299737	0.278981	-1.0744	0.282644	0.42442	chrX	3196307	3199321	-	fax-1
1265	WBGene00001401	254.929	-0.197751	0.148434	-1.33225	0.182778	0.306162	chrII	6078265	6080843	-	fbf-1
1266	WBGene00001402	491.212	0.0928914	0.124245	0.747648	0.454673	0.599675	chrII	6088866	6091480	-	fbf-2
1267	WBGene00001403	1652.86	0.0632457	0.0953712	0.663153	0.507233	0.646679	chrIV	9540808	9546250	+	fbl-1
1268	WBGene00001404	9077.96	0.150858	0.0856558	1.76121	0.0782027	0.161234	chrI	2580935	2586126	-	fbp-1
1269	WBGene00001405	2221.91	0.0732103	0.0768844	0.952213	0.340989	0.487602	chrI	9711064	9712719	-	fce-1
1270	WBGene00001406	531.334	0.0314057	0.103553	0.303283	0.761674	0.845443	chrV	20425301	20431337	+	fce-2
1271	WBGene00001410	1104.09	0.385948	0.148211	2.60405	0.00921306	0.0282659	chrIII	2549927	2560684	+	feh-1
1272	WBGene00001411	1711.67	-0.139873	0.0793757	-1.76216	0.0780422	0.160975	chrIV	5533142	5537992	-	fem-1
1273	WBGene00001412	1014.09	0.150156	0.0963843	1.55789	0.119259	0.222956	chrIII	631938	634645	-	fem-2
1274	WBGene00001413	96.3634	0.217295	0.22402	0.969979	0.332057	0.478404	chrIV	9104966	9107609	+	fem-3
1275	WBGene00001414	17.4379	0.60146	0.36981	1.6264	0.103864	0.20041	chrI	8623017	8631184	-	fer-1
1276	WBGene00001423	23563.1	0.173462	0.0861016	2.01461	0.0439451	0.101652	chrV	15000653	15002273	-	fib-1
1277	WBGene00001424	0.786026	0.136139	0.209644	0.649381	0.516092	NA	chrII	6755136	6755965	+	fis-1
1278	WBGene00001425	541.453	0.1655	0.108806	1.52105	0.128248	0.235303	chrX	8283282	8285219	-	fis-2
1279	WBGene00001426	4412.05	0.0515787	0.0712004	0.724415	0.468811	0.612587	chrIV	11036548	11038148	+	fkb-1
1280	WBGene00001427	8712.65	0.134937	0.063037	2.14061	0.0323057	0.0794571	chrI	12918722	12919278	+	fkb-2
1281	WBGene00001428	1620.38	-0.316453	0.130456	-2.42574	0.0152774	0.0433006	chrV	7225223	7226320	+	fkb-3
1282	WBGene00001429	272.017	-0.230323	0.15687	-1.46823	0.142041	0.254678	chrV	12785154	12787126	-	fkb-4
1283	WBGene00001430	4192.51	-0.940793	0.330269	-2.84856	0.00439172	0.0151422	chrI	3898046	3899840	-	fkb-5
1284	WBGene00001431	6569.28	0.116884	0.113823	1.02689	0.30447	0.448162	chrV	20846113	20847727	+	fkb-6
1285	WBGene00001432	224.617	-0.674081	0.166793	-4.04141	5.31304e-05	0.000333976	chrI	10667808	10671301	+	fkb-7
1286	WBGene00001433	265.735	0.154472	0.130679	1.18207	0.237176	0.371766	chrI	12916441	12918108	+	fkb-8
1287	WBGene00001434	22.9888	-0.46567	0.333543	-1.39613	0.162675	0.28116	chrX	3740208	3742323	-	fkh-2
1288	WBGene00001435	11.591	2.09774	0.405398	5.17453	2.28479e-07	2.51575e-06	chrX	13421824	13423427	-	fkh-3
1289	WBGene00001436	3.02878	0.90215	0.350917	2.57083	0.0101454	0.0306273	chrX	13427062	13428842	-	fkh-4
1290	WBGene00001437	4.26701	0.64075	0.399351	1.60448	0.108609	0.20711	chrIII	4844662	4846546	+	fkh-5
1291	WBGene00001438	22.0399	-0.262805	0.352505	-0.745535	0.455948	0.600794	chrII	4379652	4383348	-	fkh-6
1292	WBGene00001439	820.206	-0.53269	0.0982331	-5.42272	5.86986e-08	7.24981e-07	chrIV	5584661	5610368	+	fkh-7
1293	WBGene00001440	92.0566	-0.987328	0.224926	-4.38957	1.13574e-05	8.43699e-05	chrII	6189580	6191402	-	fkh-8
1294	WBGene00001441	809.985	0.671425	0.101261	6.63065	3.34218e-11	7.16567e-10	chrX	3816851	3826963	-	fkh-9
1295	WBGene00001442	32.9816	-0.864729	0.310628	-2.78381	0.00537247	0.0180436	chrI	10163475	10165135	-	fkh-10
1296	WBGene00001443	2436.31	-0.182925	0.0728076	-2.51244	0.01199	0.0353088	chrIII	8675297	8683732	-	fli-1
1297	WBGene00001444	2370.56	0.404705	0.092821	4.36006	1.30026e-05	9.53506e-05	chrIV	9144692	9146122	+	flp-1
1298	WBGene00001445	244.285	0.117523	0.163717	0.71784	0.472856	0.615568	chrX	10094430	10095245	-	flp-2
1299	WBGene00001446	558.582	0.291001	0.119669	2.43172	0.0150273	0.0426699	chrX	10091961	10092964	-	flp-3
1300	WBGene00001447	280.635	-0.684756	0.138011	-4.9616	6.99155e-07	6.89232e-06	chrII	10054623	10055594	+	flp-4
1301	WBGene00001448	798.245	-0.365045	0.115154	-3.17005	0.00152411	0.00615798	chrX	8528250	8531033	+	flp-5
1302	WBGene00001449	478.269	-0.592144	0.129208	-4.58287	4.58631e-06	3.73676e-05	chrV	9471975	9473796	+	flp-6
1303	WBGene00001450	353.342	-1.23387	0.132335	-9.32382	1.12229e-20	7.26984e-19	chrX	5885865	5886823	+	flp-7
1304	WBGene00001451	750.033	-0.00174187	0.139878	-0.0124527	0.990064	0.993709	chrX	14881419	14882300	+	flp-8
1305	WBGene00001452	1457.93	-0.558785	0.099861	-5.59563	2.19819e-08	2.93955e-07	chrIV	12754558	12757673	-	flp-9
1306	WBGene00001453	48.6267	-0.383541	0.279346	-1.373	0.169753	0.290037	chrIV	7868907	7870100	+	flp-10
1307	WBGene00001454	839.854	-0.314388	0.106194	-2.9605	0.00307139	0.0111852	chrX	4677342	4678129	-	flp-11
1308	WBGene00001455	820.209	-0.0374902	0.117833	-0.318163	0.750361	0.837218	chrX	4591281	4592404	-	flp-12
1309	WBGene00001456	647.265	-0.341579	0.143602	-2.37865	0.017376	0.0481212	chrIV	7696932	7698420	-	flp-13
1310	WBGene00001457	1086.54	-0.392062	0.113328	-3.45953	0.000541112	0.0025177	chrIII	12910510	12914930	+	flp-14
1311	WBGene00001458	532.893	-0.174034	0.148874	-1.169	0.242402	0.377941	chrIII	13663400	13667839	-	flp-15
1312	WBGene00001459	603.743	-1.13528	0.123862	-9.16565	4.92501e-20	2.99884e-18	chrII	13235306	13237417	+	flp-16
1313	WBGene00001460	918.197	-0.24489	0.120736	-2.02831	0.0425286	0.0991031	chrIV	17190177	17191891	-	flp-17
1314	WBGene00001461	1070.25	-0.484226	0.0920881	-5.25829	1.45399e-07	1.66416e-06	chrX	3012190	3018555	-	flp-18
1315	WBGene00001462	598.953	-0.0402736	0.113222	-0.355706	0.722061	0.815828	chrX	10604686	10605828	+	flp-19
1316	WBGene00001463	197.27	-0.514178	0.176722	-2.90954	0.00361966	0.0128915	chrX	9349276	9349890	-	flp-20
1317	WBGene00001464	213.079	-0.204365	0.213391	-0.957699	0.338214	0.484805	chrV	7793367	7794025	+	flp-21
1318	WBGene00001465	322.761	-0.36077	0.132892	-2.71476	0.00663242	0.0215462	chrX	13452667	13456658	-	flr-1
1319	WBGene00001466	96.3187	-0.794551	0.211698	-3.75323	0.000174569	0.000946133	chrV	11936505	11937794	-	flr-2
1320	WBGene00001468	287.542	0.219042	0.128658	1.70251	0.0886596	0.17766	chrX	15089397	15093585	+	flr-4
1321	WBGene00001470	1935.53	-0.724584	0.088417	-8.19508	2.50434e-16	1.05651e-14	chrIII	7650549	7656032	-	baz-2
1322	WBGene00001475	3491.09	-0.193706	0.0866383	-2.2358	0.0253648	0.0654711	chrV	13019068	13033373	+	fmi-1
1323	WBGene00001476	965.994	-0.0298453	0.111267	-0.268232	0.788521	0.863902	chrIV	10661857	10664404	+	fmo-1
1324	WBGene00001477	29.4937	1.05626	0.352964	2.99254	0.00276664	0.0102408	chrIV	10682524	10684385	+	fmo-2
1325	WBGene00001478	506.06	0.471733	0.15529	3.03776	0.00238342	0.00899953	chrIII	10694590	10698861	+	fmo-3
1331	WBGene00001479	7661.21	0.144939	0.268262	0.540288	0.588999	0.714994	chrV	13603276	13606701	-	fmo-4
1332	WBGene00001480	709.233	0.124628	0.134865	0.9241	0.355434	0.501717	chrV	899310	903665	-	fmo-5
1333	WBGene00001481	309.228	-0.274179	0.175686	-1.56062	0.118614	0.221955	chrI	3211046	3217366	+	fog-1
1341	WBGene00001482	78.2871	0.0107968	0.214916	0.0502374	0.959933	0.975202	chrV	20199262	20200640	+	fog-2
1342	WBGene00001483	120.777	0.00908833	0.180513	0.0503472	0.959846	0.975167	chrI	10016778	10018114	+	fog-3
1343	WBGene00001484	511.628	-0.898144	0.114559	-7.83999	4.50572e-15	1.64612e-13	chrX	2445500	2455949	-	fox-1
1344	WBGene00001485	625.685	-0.142129	0.110285	-1.28874	0.19749	0.324215	chrV	20075935	20087733	-	fre-1
1345	WBGene00001486	199.086	0.175032	0.149319	1.1722	0.241115	0.37632	chrII	5917422	5918564	+	frh-1
1346	WBGene00001487	14.0717	0.971265	0.376402	2.5804	0.00986873	0.0299356	chrIV	10043183	10045739	+	frk-1
1347	WBGene00001488	29747.2	0.410807	0.0761676	5.39347	6.91105e-08	8.41067e-07	chrI	14875784	14900213	-	frm-1
1348	WBGene00001489	767.081	-0.281461	0.105971	-2.65602	0.00790679	0.0248872	chrIII	5976781	5982126	-	frm-2
1349	WBGene00001490	1547.15	-0.0967043	0.0939135	-1.02972	0.303143	0.446861	chrX	11572565	11585126	+	frm-3
1350	WBGene00001491	2082.55	-0.175717	0.0908141	-1.93491	0.0530019	0.118094	chrI	5402889	5408344	-	frm-4
1351	WBGene00001492	4755.14	-0.116227	0.0779095	-1.49182	0.135746	0.24578	chrIV	32481	48880	-	frm-5.1
1352	WBGene00001493	4229.18	0.537297	0.157408	3.41341	0.000641544	0.00291664	chrV	12302484	12306978	+	frm-7
1353	WBGene00001494	1031.32	-0.726664	0.0939849	-7.73171	1.06112e-14	3.72758e-13	chrIII	3200795	3219150	-	frm-8
1354	WBGene00001495	854.75	-0.0826627	0.0911217	-0.907168	0.364318	0.510871	chrX	10816968	10838650	-	frm-9
1355	WBGene00001496	1812.01	-0.102564	0.170042	-0.60317	0.546396	0.681112	chrV	13463128	13467131	+	frm-10
1356	WBGene00001497	5336.58	0.0162706	0.0713563	0.228019	0.819631	0.885143	chrI	6211986	6214645	-	fars-1
1357	WBGene00001498	5989.48	0.0893128	0.063612	1.40403	0.160311	0.278366	chrII	8464848	8467072	+	fars-3
1358	WBGene00001499	446.599	0.114488	0.114465	1.0002	0.317211	0.462413	chrIII	4937322	4939453	+	fsn-1
1359	WBGene00001500	64.407	-1.42599	0.307282	-4.64065	3.47321e-06	2.9197e-05	chrV	7546468	7548012	-	ftn-1
1360	WBGene00001501	12904.6	-0.344828	0.105999	-3.25312	0.00114147	0.0048011	chrI	3680178	3680944	-	ftn-2
1361	WBGene00001502	14798.1	-0.253689	0.0688437	-3.685	0.0002287	0.00119875	chrX	11603709	11605451	-	ftt-2
1362	WBGene00001503	8933.67	0.0624154	0.0649764	0.960585	0.336761	0.483237	chrIII	7465605	7467633	+	fum-1
1363	WBGene00001505	595.781	-0.158499	0.12335	-1.28496	0.198808	0.325637	chrII	8756291	8758723	-	fut-1
1364	WBGene00001506	36.8107	-0.0523696	0.300635	-0.174196	0.861711	0.912832	chrV	6573983	6575797	-	fut-2
1365	WBGene00001507	7.6754	-0.183572	0.405103	-0.453148	0.650442	0.763639	chrII	2819435	2822490	-	fut-4
1366	WBGene00001508	524.63	-0.505075	0.102143	-4.94479	7.62266e-07	7.45812e-06	chrV	5987003	5990252	-	fut-8
1367	WBGene00001509	2289.6	0.0969587	0.0715718	1.35471	0.175511	0.297051	chrII	5833328	5836203	-	fzo-1
1368	WBGene00001510	1309.1	0.00401625	0.143559	0.0279763	0.977681	0.986211	chrII	9640167	9644466	-	fzr-1
1369	WBGene00001511	488.327	-0.0810975	0.109279	-0.742111	0.45802	0.602611	chrII	5501633	5503908	+	fzy-1
1370	WBGene00001512	351.717	-0.709257	0.142043	-4.99325	5.93726e-07	6.00817e-06	chrIII	12771878	12779726	-	gab-1
1371	WBGene00001513	1132.68	-0.0516027	0.0831755	-0.620407	0.53499	0.671342	chrV	6431331	6433496	-	gad-1
1372	WBGene00001514	316.341	0.225387	0.131779	1.71035	0.0872014	0.175411	chrIII	5604460	5607549	+	xnd-1
1373	WBGene00001515	661.071	-0.537053	0.0987035	-5.44107	5.29606e-08	6.5767e-07	chrX	2192504	2195348	+	gap-1
1374	WBGene00001516	2925.18	-0.187128	0.0750193	-2.49439	0.0126173	0.0368473	chrX	9472469	9516440	+	gap-2
1375	WBGene00001517	246.675	-0.618002	0.146553	-4.21691	2.47669e-05	0.000169381	chrX	6479447	6484810	-	gar-1
1376	WBGene00001518	1001.37	-0.521288	0.123093	-4.23492	2.28629e-05	0.000157777	chrIII	6309378	6320872	+	gar-2
1377	WBGene00001519	974.083	-0.406205	0.093974	-4.32252	1.54254e-05	0.000111154	chrV	14564752	14579719	-	gar-3
1378	WBGene00001520	11657.4	0.294128	0.0578526	5.08408	3.69404e-07	3.9073e-06	chrX	15586812	15590397	-	gas-1
1379	WBGene00001522	199.78	-0.20057	0.19043	-1.05325	0.292227	0.434416	chrII	10690452	10693863	-	gbh-1
1380	WBGene00001523	512.152	-0.562654	0.114667	-4.90686	9.2546e-07	8.90694e-06	chrII	8485879	8487571	+	gbh-2
1381	WBGene00001526	1361.53	-0.107138	0.0855079	-1.25297	0.210218	0.33946	chrV	8947799	8956294	+	gck-1
1382	WBGene00001527	3838.25	0.179132	0.066481	2.69449	0.00704964	0.022624	chrII	9035562	9038301	-	gcs-1
1383	WBGene00001528	1.41558	0.49414	0.288527	1.71263	0.0867813	0.174917	chrII	9512490	9516936	-	gcy-1
1384	WBGene00001529	1.91682	0.612472	0.33501	1.82822	0.0675162	0.143476	chrII	9507604	9512095	-	gcy-2
1385	WBGene00001530	62.9398	-2.06764	0.25771	-8.02311	1.03099e-15	4.02418e-14	chrII	9502757	9507281	-	gcy-3
1386	WBGene00001531	42.919	-0.21659	0.270492	-0.800726	0.42329	0.57014	chrII	10304139	10308826	-	gcy-4
1387	WBGene00001532	42.8166	0.791805	0.302262	2.6196	0.00880321	0.0272279	chrII	10310400	10316219	-	gcy-5
1388	WBGene00001533	35.9547	0.374507	0.327527	1.14344	0.252857	0.39008	chrV	10308291	10314053	-	gcy-6
1392	WBGene00001534	161.751	0.799571	0.179684	4.44987	8.59209e-06	6.58907e-05	chrV	8387356	8392324	+	gcy-7
1393	WBGene00001535	144.504	0.396106	0.196063	2.02031	0.0433517	0.100623	chrIV	7928159	7933775	+	gcy-8
1394	WBGene00001536	94.048	-0.207024	0.226141	-0.915463	0.359948	0.506601	chrX	11332553	11338301	-	gcy-9
1395	WBGene00001537	718.712	-0.125742	0.104416	-1.20424	0.228498	0.361758	chrX	17046261	17055581	-	gcy-11
1396	WBGene00001538	4124.24	-0.431459	0.109515	-3.93974	8.15687e-05	0.000485347	chrII	5312046	5319234	+	gcy-12
1397	WBGene00001539	17.812	0.149866	0.359147	0.417283	0.676471	0.783618	chrV	12363754	12369537	-	gcy-13
1398	WBGene00001540	41.7249	-0.0969561	0.28895	-0.335547	0.737213	0.827811	chrV	14863168	14867992	-	gcy-14
1399	WBGene00001541	195.443	-0.44295	0.150332	-2.94647	0.00321425	0.0116382	chrII	3192420	3197066	-	gcy-15
1400	WBGene00001542	120.448	-0.137385	0.208514	-0.658877	0.509975	0.648952	chrI	2223307	2233099	-	gcy-17
1401	WBGene00001543	364.52	-0.152399	0.139909	-1.08927	0.276034	0.41694	chrIV	12860137	12865935	+	gcy-18
1402	WBGene00001544	200.239	-0.131511	0.199031	-0.660754	0.50877	0.648029	chrII	3250985	3259354	-	gcy-19
1403	WBGene00001545	25.9407	-0.474294	0.318395	-1.48964	0.136319	0.24667	chrV	16248583	16253787	-	gcy-20
1404	WBGene00001546	228.413	-0.85757	0.150183	-5.71017	1.12864e-08	1.58958e-07	chrII	2659670	2665022	+	gcy-21
1405	WBGene00001547	208.88	-0.232618	0.171836	-1.35372	0.175825	0.297471	chrV	20820366	20825028	-	gcy-22
1406	WBGene00001548	166.877	0.666191	0.186851	3.56536	0.000363353	0.00178025	chrIV	3282885	3289337	-	gcy-23
1407	WBGene00001549	53.8911	-0.0200479	0.261698	-0.076607	0.938936	0.963166	chrIV	15872933	15882377	+	gcy-25
1408	WBGene00001550	19.8356	-0.356646	0.369503	-0.965205	0.334442	0.480816	chrIV	17432977	17436652	-	gcy-27
1412	WBGene00001551	47.4647	0.580573	0.277117	2.09505	0.0361665	0.086871	chrX	2420462	2427504	-	gcy-31
1413	WBGene00001552	121.524	-1.2863	0.211399	-6.08471	1.16705e-09	1.95046e-08	chrV	13912080	13915436	-	gcy-32
1414	WBGene00001553	125.934	-0.572001	0.220579	-2.59318	0.00950921	0.0290137	chrV	11995868	12001965	-	gcy-33
1415	WBGene00001554	162.745	1.99616	0.214702	9.29737	1.43957e-20	9.22687e-19	chrV	13383019	13385898	-	gcy-34
1416	WBGene00001555	246.205	-0.740298	0.191021	-3.87548	0.000106414	0.000610703	chrI	13325230	13333508	+	gcy-35
1417	WBGene00001556	127.271	-0.718583	0.213539	-3.36511	0.000765121	0.00340226	chrX	15479017	15485700	+	gcy-36
1418	WBGene00001557	193.82	-0.893366	0.181782	-4.9145	8.90108e-07	8.60752e-06	chrIV	2150650	2159162	-	gcy-37
1419	WBGene00001558	14487.9	-0.0139702	0.0602264	-0.231962	0.816568	0.88267	chrIV	14790818	14792887	-	gdi-1
1420	WBGene00001559	2083.41	-0.904971	0.0938798	-9.63968	5.43561e-22	3.89382e-20	chrIII	3344875	3363409	+	gei-1
1421	WBGene00001560	1986.86	-0.133768	0.0972159	-1.37598	0.168827	0.289146	chrX	12795216	12813947	-	gei-3
1422	WBGene00001561	2768.05	-0.764441	0.10988	-6.95704	3.47502e-12	8.71954e-11	chrIII	344307	378250	-	gei-4
1423	WBGene00001562	1231.23	0.101759	0.120523	0.844314	0.398494	0.546165	chrIV	13888089	13893985	+	lin-66
1424	WBGene00001563	1225.47	-0.0997247	0.0825439	-1.20814	0.226993	0.359781	chrV	7226376	7230848	-	gei-6
1426	WBGene00001564	14130.4	-0.555417	0.107812	-5.15173	2.58093e-07	2.81299e-06	chrV	724207	728103	-	icl-1
1427	WBGene00001565	3053.04	-0.255704	0.083858	-3.04925	0.00229412	0.00872511	chrIII	8111166	8126222	-	gei-8
1428	WBGene00001566	1954.63	-0.13323	0.0855973	-1.55647	0.119596	0.223472	chrIV	8496486	8498871	-	acdh-13
1429	WBGene00001568	1184.59	-0.153015	0.085555	-1.78849	0.0736964	0.153718	chrI	8962322	8966129	+	snpc-4
1430	WBGene00001569	41.7575	0.294952	0.282162	1.04533	0.295871	0.438869	chrX	1986429	1989607	-	meg-3
1431	WBGene00001570	1123.02	-0.706925	0.196091	-3.60508	0.000312056	0.00156216	chrIII	9631994	9637116	-	gei-13
1432	WBGene00001571	163.08	0.476073	0.169036	2.81639	0.00485665	0.0164814	chrII	8273543	8276231	-	gei-14
1433	WBGene00001572	1939.87	0.550751	0.0779105	7.06902	1.56036e-12	4.11299e-11	chrX	6820005	6823268	-	gei-15
1434	WBGene00001574	2654.87	0.100119	0.102138	0.980238	0.326969	0.473013	chrI	9100846	9107939	-	gei-17
1435	WBGene00001575	36.455	-0.297014	0.30554	-0.972096	0.331003	0.477073	chrIV	13981087	13982525	-	gei-18
1436	WBGene00001577	85.963	0.882708	0.228456	3.8638	0.000111635	0.00063653	chrIV	11745640	11748640	+	gem-4
1437	WBGene00001578	1172.84	-0.564872	0.113735	-4.96658	6.81445e-07	6.73591e-06	chrV	1427653	1432137	-	ges-1
1438	WBGene00001579	1617.89	-0.398706	0.0814762	-4.89353	9.90431e-07	9.4674e-06	chrIV	572723	583577	+	gex-2
1439	WBGene00001580	1685.71	-0.576688	0.0775393	-7.43736	1.02717e-13	3.17484e-12	chrIV	12404374	12408697	+	gex-3
1440	WBGene00001581	49277.8	-0.533202	0.0878184	-6.07164	1.26609e-09	2.10635e-08	chrV	6392541	6399921	-	gfi-1
1441	WBGene00001582	2540.72	-0.0801947	0.0819661	-0.978388	0.327882	0.473997	chrI	9737823	9744190	+	gfi-2
1442	WBGene00001583	431.083	-0.442177	0.119156	-3.71092	0.000206505	0.0010953	chrX	14480572	14484702	+	gfi-3
1443	WBGene00001584	755.598	-0.328293	0.107718	-3.04769	0.00230607	0.00875779	chrIV	7646200	7654262	-	nrde-4
1444	WBGene00001585	263.122	-0.201208	0.134211	-1.49919	0.133824	0.243143	chrIV	11521290	11522214	+	gfl-1
1445	WBGene00001586	137.909	-1.05029	0.216109	-4.85998	1.17397e-06	1.10143e-05	chrII	10695013	10702524	+	ggr-1
1446	WBGene00001587	116.946	-0.799419	0.19458	-4.10844	3.98337e-05	0.000258763	chrX	6070497	6081833	+	ggr-2
1447	WBGene00001588	117.048	-0.427723	0.188287	-2.27165	0.0231077	0.0608312	chrII	5130384	5133215	+	ggr-3
1448	WBGene00001589	1253.25	-0.233346	0.101403	-2.30118	0.0213816	0.057077	chrIII	2347591	2362056	+	gip-1
1449	WBGene00001590	223.863	-0.250019	0.151616	-1.64902	0.0991432	0.193485	chrI	9226905	9228184	+	C45G3.3
1450	WBGene00001591	505.737	-0.631172	0.125775	-5.01826	5.21428e-07	5.34508e-06	chrV	16219541	16221948	+	glc-1
1451	WBGene00001592	445.856	-0.306225	0.115499	-2.65132	0.00801773	0.0251714	chrI	4885062	4888002	-	glc-2
1452	WBGene00001593	138.258	-0.658932	0.18016	-3.65748	0.000254708	0.00131664	chrV	5449287	5453715	-	glc-3
1453	WBGene00001594	396.409	-0.480432	0.127328	-3.77319	0.000161171	0.000882525	chrII	7172204	7174936	-	glc-4
1454	WBGene00001595	369.009	0.363898	0.148016	2.4585	0.0139519	0.0401415	chrI	7695661	7698227	+	gld-1
1455	WBGene00001596	1872.78	0.129514	0.0908575	1.42547	0.154022	0.270099	chrI	6369934	6386183	+	gld-2
1456	WBGene00001597	316.907	0.000331992	0.126761	0.00261904	0.99791	0.998949	chrII	7132643	7137522	+	gld-3
1457	WBGene00001598	3167.76	-0.235398	0.069184	-3.40248	0.000667766	0.00301819	chrI	6854688	6857529	+	glh-1
1458	WBGene00001599	228.599	0.126352	0.175144	0.721416	0.470653	0.613795	chrI	6513928	6517507	+	glh-2
1459	WBGene00001600	211.492	0.507921	0.156215	3.25143	0.00114826	0.00482745	chrI	5792324	5795114	-	glh-3
1460	WBGene00001601	879.277	0.0937964	0.109633	0.855547	0.392248	0.540036	chrI	3726011	3731265	+	glh-4
1461	WBGene00001602	1802.48	0.685285	0.0788313	8.69306	3.52802e-18	1.83608e-16	chrX	6058255	6060242	+	gln-1
1462	WBGene00001603	32.1404	3.39935	0.36679	9.26784	1.89954e-20	1.20902e-18	chrIII	9943243	9944823	-	gln-2
1464	WBGene00001604	5589.14	0.18101	0.170052	1.06444	0.287129	0.429038	chrIV	16167785	16170859	-	gln-3
1465	WBGene00001606	109.867	1.06678	0.195622	5.45326	4.94546e-08	6.17644e-07	chrIV	17272231	17273652	-	gln-5
1466	WBGene00001607	146.418	0.16891	0.183351	0.921238	0.356926	0.5032	chrIV	9739219	9740908	-	gln-6
1467	WBGene00001608	67.7825	0.105398	0.256911	0.41025	0.681622	0.787203	chrX	9870804	9872654	-	R07B1.8
1468	WBGene00001609	733.232	0.0456827	0.097681	0.467673	0.640019	0.755735	chrIII	9092241	9099698	+	glp-1
1469	WBGene00001612	244.875	-0.49477	0.160653	-3.07974	0.00207182	0.00799451	chrIII	8584186	8588642	-	glr-1
1470	WBGene00001613	259.701	0.460461	0.184215	2.49958	0.0124339	0.0363874	chrIII	7138683	7144832	-	glr-2
1471	WBGene00001614	49.8777	-0.288002	0.255207	-1.1285	0.259108	0.397851	chrI	7117808	7121545	+	glr-3
1472	WBGene00001615	610.188	-0.305807	0.10352	-2.95408	0.00313606	0.0113889	chrII	7785100	7794319	-	glr-4
1473	WBGene00001616	513.212	-1.00874	0.124088	-8.12929	4.31819e-16	1.76862e-14	chrV	8716495	8720893	+	glr-5
1474	WBGene00001617	498.482	-0.33433	0.109491	-3.05349	0.002262	0.00862269	chrX	6836386	6840615	-	glr-6
1475	WBGene00001618	51.5633	0.878546	0.272018	3.22974	0.00123905	0.0051487	chrX	2413909	2419877	-	glr-7
1476	WBGene00001619	34.823	-0.221639	0.300282	-0.738102	0.460453	0.604669	chrX	6506276	6509882	+	glr-8
1477	WBGene00001620	6103.61	-0.692856	0.0767008	-9.03323	1.66685e-19	9.7279e-18	chrX	3496026	3499165	+	glt-1
1478	WBGene00001621	734.539	0.154995	0.145404	1.06596	0.286443	0.428258	chrIV	10130257	10133283	+	glt-3
1479	WBGene00001622	929.784	0.154877	0.0959836	1.61358	0.106619	0.204388	chrX	6403424	6406981	+	glt-4
1480	WBGene00001623	162.257	0.141442	0.189408	0.746759	0.455209	0.600158	chrII	9706483	9708885	-	glt-5
1481	WBGene00001624	425.572	0.268403	0.135313	1.98357	0.0473038	0.107918	chrIV	7503622	7506447	+	glt-6
1482	WBGene00001625	215.977	-0.00895802	0.146447	-0.061169	0.951225	0.970124	chrIV	532135	535703	+	glt-7
1483	WBGene00001626	16.2789	-0.295562	0.36602	-0.807503	0.419377	0.566352	chrII	10900042	10902204	-	gly-1
1484	WBGene00001627	358.129	-0.599417	0.118706	-5.04962	4.42698e-07	4.61573e-06	chrI	6507894	6511630	+	gly-2
1485	WBGene00001628	1878.16	-0.293353	0.0835758	-3.51002	0.000448078	0.00213263	chrIII	7914314	7917767	-	gly-3
1486	WBGene00001629	2368.05	0.0355554	0.0744585	0.47752	0.632992	0.75001	chrV	19881374	19895350	-	gly-4
1487	WBGene00001630	3301.96	-0.106586	0.068521	-1.55553	0.11982	0.223752	chrIII	13187392	13204897	+	gly-5
1488	WBGene00001631	2542.28	-0.295054	0.0693873	-4.25227	2.11611e-05	0.000146922	chrIII	4324280	4331227	-	gly-6
1489	WBGene00001632	3180.8	0.0665507	0.0770449	0.86379	0.387703	0.535393	chrV	1815852	1821323	-	gly-7
1490	WBGene00001633	4912.94	0.952696	0.129524	7.35536	1.90413e-13	5.72085e-12	chrIII	11624991	11628238	+	gly-8
1491	WBGene00001635	1508.64	-0.48733	0.0894056	-5.45077	5.01524e-08	6.2492e-07	chrIV	13778866	13782396	+	gly-10
1492	WBGene00001636	640.641	-0.519102	0.156609	-3.31464	0.000917596	0.00398425	chrIII	12171353	12177245	-	gly-11
1493	WBGene00001637	697.735	-1.01897	0.119348	-8.53777	1.36841e-17	6.77418e-16	chrX	7485864	7490707	+	gly-12
1494	WBGene00001638	919.791	-0.169353	0.0881216	-1.92181	0.0546291	0.12115	chrX	9293664	9296622	-	gly-13
1495	WBGene00001639	38.0825	1.81001	0.304241	5.94927	2.6934e-09	4.25976e-08	chrIII	3490363	3493234	-	gly-14
1496	WBGene00001640	12.6628	2.20097	0.401934	5.47596	4.3515e-08	5.50859e-07	chrI	12462176	12465831	+	gly-15
1497	WBGene00001641	0	NA	NA	NA	NA	NA	chrI	12379335	12381032	-	gly-16
1498	WBGene00001642	0	NA	NA	NA	NA	NA	chrI	12376904	12378674	-	gly-17
1499	WBGene00001643	60.686	-0.322465	0.242722	-1.32853	0.184002	0.307518	chrI	7110240	7112287	+	gly-18
1500	WBGene00001644	250.917	-0.605218	0.138392	-4.37323	1.22424e-05	9.02103e-05	chrI	7112903	7115001	+	gly-19
1501	WBGene00001645	889.74	-0.90237	0.11413	-7.90651	2.64703e-15	9.86801e-14	chrV	11282572	11286039	+	gly-20
1502	WBGene00001646	256.705	-0.113238	0.140131	-0.808085	0.419042	0.566136	chrV	10319535	10320158	-	gna-1
1503	WBGene00001647	134.943	0.808132	0.212975	3.7945	0.00014794	0.000816315	chrI	7699543	7700958	+	gna-2
1504	WBGene00001648	2912.94	-0.252286	0.0824704	-3.05911	0.00221995	0.00849075	chrI	7522116	7526703	+	goa-1
1505	WBGene00001649	2637.7	0.0329198	0.0686688	0.4794	0.631654	0.748828	chrX	15493536	15497504	+	gob-1
1506	WBGene00001650	9321.61	0.0488203	0.0661817	0.737671	0.460714	0.604807	chrIV	9934767	9953433	-	gon-1
1507	WBGene00001651	4861.87	0.0988638	0.089427	1.10552	0.268932	0.408497	chrI	8549513	8570998	-	gon-2
1508	WBGene00001653	891.2	-0.413687	0.0881409	-4.69347	2.6861e-06	2.31776e-05	chrIV	10197820	10202993	+	gon-4
1509	WBGene00001660	1206.16	0.00486008	0.0814825	0.0596458	0.952438	0.970664	chrIII	5254438	5258922	+	gop-1
1510	WBGene00001661	929.04	0.0543961	0.0940645	0.578285	0.563072	0.69371	chrIII	5259023	5260512	+	gop-2
1511	WBGene00001662	2614.8	0.160954	0.0733844	2.1933	0.0282858	0.0715017	chrIII	5260693	5263837	+	gop-3
1512	WBGene00001663	111.806	0.463187	0.193907	2.38871	0.0169078	0.0470744	chrV	11174567	11177559	-	gpa-1
1513	WBGene00001664	138.437	-0.201366	0.225019	-0.894884	0.370849	0.517919	chrV	8371014	8374027	+	gpa-2
1514	WBGene00001665	157.605	-1.12553	0.193604	-5.81359	6.11487e-09	9.05189e-08	chrV	9356750	9359774	-	gpa-3
1515	WBGene00001666	62.8848	0.706079	0.244801	2.8843	0.0039228	0.0138016	chrIV	401695	405346	+	gpa-4
1516	WBGene00001667	54.414	1.24424	0.267231	4.65604	3.22346e-06	2.72606e-05	chrX	2118894	2121061	-	gpa-5
1517	WBGene00001668	22.959	-0.495131	0.368429	-1.3439	0.178982	0.30136	chrX	13191246	13193955	+	gpa-6
1518	WBGene00001669	470.854	-0.880288	0.132065	-6.66554	2.63689e-11	5.78944e-10	chrIV	10404012	10408530	+	gpa-7
1519	WBGene00001670	14.8918	0.408464	0.366121	1.11565	0.264571	0.403887	chrV	12638852	12640470	-	gpa-8
1520	WBGene00001671	31.2211	-0.14265	0.300663	-0.474452	0.635177	0.751817	chrV	12646827	12649313	-	gpa-9
1521	WBGene00001672	30.6482	-0.906151	0.340005	-2.66511	0.00769631	0.0243485	chrV	6852568	6854803	-	gpa-10
1522	WBGene00001673	41.0912	-0.773866	0.287043	-2.69599	0.007018	0.0225439	chrII	4247197	4255281	+	gpa-11
1523	WBGene00001674	432.051	-0.151123	0.118528	-1.275	0.202311	0.329906	chrX	9247007	9249103	+	gpa-12
1524	WBGene00001675	23.392	-0.920452	0.33945	-2.7116	0.00669598	0.0216948	chrV	12752762	12754893	-	gpa-13
1525	WBGene00001676	80.1851	-1.28408	0.237656	-5.4031	6.54987e-08	8.02996e-07	chrI	5942419	5945537	+	gpa-14
1526	WBGene00001677	36.9293	-0.128426	0.283352	-0.453238	0.650377	0.763639	chrI	8531760	8534527	-	gpa-15
1527	WBGene00001678	336.115	-0.239745	0.164289	-1.45928	0.144487	0.257899	chrI	897286	906077	+	gpa-16
1528	WBGene00001679	4641.48	-0.00196879	0.086996	-0.0226308	0.981945	0.988436	chrII	11742814	11748603	-	gpb-1
1529	WBGene00001680	931.058	-0.757484	0.102059	-7.42201	1.15354e-13	3.54147e-12	chrI	7318290	7321085	-	gpb-2
1530	WBGene00001681	121.952	-0.967419	0.194545	-4.97273	6.60181e-07	6.56122e-06	chrX	12881126	12884989	-	gpc-1
1531	WBGene00001682	2044.77	-0.145147	0.106813	-1.35889	0.174181	0.295669	chrI	6757763	6758178	+	gpc-2
1532	WBGene00001683	453.196	1.22802	0.144922	8.47368	2.37763e-17	1.12228e-15	chrII	10394114	10395349	+	gpd-1
1536	WBGene00001684	29126.7	0.179833	0.0740478	2.42861	0.015157	0.0430059	chrX	3113434	3114771	-	gpd-2
1537	WBGene00001685	33104.9	0.164822	0.0786278	2.09623	0.0360617	0.0866533	chrX	3112083	3113382	-	gpd-3
1538	WBGene00001686	399.225	0.502596	0.131172	3.83158	0.000127322	0.000714746	chrII	10171255	10172497	+	gpd-4
1542	WBGene00001687	145.35	-0.277283	0.186106	-1.48992	0.136246	0.246611	chrX	15681693	15687477	+	gpn-1
1543	WBGene00001688	270.562	-0.314265	0.139593	-2.2513	0.0243665	0.0634863	chrIII	8628926	8630776	+	gpr-1
1544	WBGene00001689	336.638	-0.255162	0.136526	-1.86897	0.0616275	0.133509	chrIII	9391270	9393164	-	gpr-2
1545	WBGene00001690	202.438	-1.08279	0.272487	-3.97374	7.07522e-05	0.000428667	chrX	11109440	11115887	+	grd-1
1546	WBGene00001691	8.88868	0.0165197	0.405089	0.0407803	0.967471	0.979773	chrV	20609794	20613929	+	grd-2
1547	WBGene00001692	2795.08	0.128697	0.121757	1.057	0.290512	0.432583	chrIV	3439655	3440453	+	grd-3
1548	WBGene00001693	2.68393	0.843526	0.344572	2.44804	0.0143636	0.0411059	chrX	8501245	8502289	+	grd-4
1549	WBGene00001694	241.48	0.114929	0.208146	0.552158	0.58084	0.708622	chrV	8619032	8619869	+	grd-5
1550	WBGene00001695	29.0445	0.688548	0.353229	1.9493	0.0512598	0.115145	chrV	9221866	9224354	+	grd-6
1551	WBGene00001696	9.3092	1.43638	0.405165	3.54517	0.000392362	0.00190169	chrX	7267989	7269479	-	grd-7
1552	WBGene00001697	19.2722	2.44266	0.405275	6.02716	1.66868e-09	2.74116e-08	chrV	7842543	7844299	+	grd-8
1553	WBGene00001698	9.80247	0.320489	0.394282	0.812842	0.416308	0.563358	chrV	5895388	5898602	+	grd-9
1554	WBGene00001699	3271.19	0.141226	0.123133	1.14694	0.251407	0.388434	chrIV	3441055	3441770	+	grd-10
1555	WBGene00001700	6.34794	0.769979	0.405442	1.89911	0.0575502	0.126552	chrV	20356802	20365718	+	grd-11
1556	WBGene00001701	10.8291	0.690381	0.391166	1.76493	0.0775754	0.160211	chrV	14978505	14980159	+	grd-12
1558	WBGene00001702	3716.1	0.132697	0.140434	0.944906	0.344707	0.491627	chrIV	3438312	3439503	+	grd-13
1559	WBGene00001703	75.042	0.395259	0.301987	1.30886	0.190582	0.315713	chrX	8499664	8501037	+	grd-14
1560	WBGene00001704	10.0177	0.189047	0.397589	0.475482	0.634443	0.75124	chrI	13564567	13566362	+	grd-15
1561	WBGene00001705	25.1147	0.507046	0.35875	1.41337	0.157547	0.274489	chrIV	2476700	2480218	+	grd-16
1562	WBGene00001707	676.475	-0.175966	0.124068	-1.4183	0.156103	0.272822	chrI	1259374	1268155	-	grh-1
1563	WBGene00001708	1084.13	-0.493246	0.103482	-4.76649	1.87468e-06	1.66803e-05	chrX	9991255	9999178	-	grk-1
1564	WBGene00001709	775.043	-0.729499	0.0997836	-7.31081	2.65538e-13	7.83615e-12	chrIII	676122	680253	+	grk-2
1565	WBGene00001710	13.6179	0.614013	0.37492	1.63772	0.101481	0.197039	chrV	5530725	5533845	-	grl-1
1566	WBGene00001711	8.84933	0.583233	0.403465	1.44556	0.1483	0.262704	chrV	12944861	12946853	+	grl-2
1567	WBGene00001712	12.8336	0.348268	0.38918	0.894875	0.370854	0.517919	chrV	11411511	11412769	+	grl-3
1568	WBGene00001713	351.93	0.579137	0.177285	3.26669	0.00108811	0.00460213	chrIV	7309838	7310760	-	grl-4
1569	WBGene00001714	23.2639	-0.670163	0.396454	-1.69039	0.090953	0.181103	chrV	4412748	4414663	-	grl-5
1570	WBGene00001715	9.6601	0.533352	0.395207	1.34955	0.17716	0.299203	chrX	6449959	6450939	-	grl-6
1571	WBGene00001716	102.573	-0.445188	0.403577	-1.10311	0.269981	0.409673	chrV	11344831	11347012	-	grl-7
1572	WBGene00001717	20.7244	-1.07448	0.365365	-2.94085	0.00327316	0.011821	chrV	6731831	6733092	-	grl-8
1573	WBGene00001718	4.89896	0.0308263	0.399845	0.0770956	0.938547	0.963056	chrV	6730281	6731694	-	grl-9
1574	WBGene00001719	142.868	0.638096	0.256171	2.49089	0.0127422	0.0371148	chrV	7774441	7775759	+	grl-10
1575	WBGene00001720	1.72206	0.402237	0.294545	1.36562	0.172057	0.292962	chrIII	9117349	9118364	-	grl-11
1576	WBGene00001721	14.2983	-0.0721429	0.391516	-0.184265	0.853805	0.907774	chrV	8635820	8637006	-	grl-12
1577	WBGene00001722	2.1098	0.0148151	0.362954	0.0408182	0.967441	0.979773	chrV	4362722	4364650	-	grl-13
1578	WBGene00001723	29.3621	0.905432	0.316469	2.86105	0.00422246	0.0146638	chrV	20825559	20827740	+	grl-14
1579	WBGene00001724	45.6529	-0.780048	0.377389	-2.06696	0.0387379	0.0916851	chrIII	12232632	12235711	-	grl-15
1580	WBGene00001725	328.338	0.429717	0.224534	1.91382	0.0556433	0.123025	chrI	572177	575120	-	grl-16
1581	WBGene00001726	25.2728	2.73248	0.376506	7.25747	3.94402e-13	1.13279e-11	chrV	13562105	13563913	-	grl-17
1582	WBGene00001727	11.7201	0.257715	0.384412	0.670415	0.502593	0.642854	chrV	5485697	5488866	-	grl-18
1583	WBGene00001728	1.18068	0.350989	0.287411	1.22121	0.222006	NA	chrIV	251970	252554	-	grl-19
1584	WBGene00001729	3.67529	0.812651	0.392	2.07309	0.0381639	0.0906436	chrIV	2126145	2128852	-	grl-20
1585	WBGene00001730	869.37	1.54347	0.360755	4.27843	1.88212e-05	0.00013254	chrIV	10737474	10738189	+	grl-21
1586	WBGene00001731	20.8	0.630177	0.357634	1.76207	0.0780568	0.160987	chrIII	5413137	5413993	-	grl-22
1587	WBGene00001732	1.37674	0.438231	0.303639	1.44326	0.148946	0.263643	chrV	12575308	12576895	-	grl-23
1588	WBGene00001733	4.12549	0.40091	0.396194	1.0119	0.311584	0.456103	chrIV	17475417	17475838	-	grl-24
1589	WBGene00001734	6.80281	1.40386	0.398616	3.52184	0.000428569	0.00205315	chrIII	8962295	8965638	+	grl-25
1590	WBGene00001735	8.20532	1.47526	0.404775	3.64465	0.000267758	0.00137037	chrIV	321571	323022	-	grl-26
1591	WBGene00001736	4.07561	0.487749	0.397802	1.22611	0.220157	0.351446	chrV	3575055	3575874	-	grl-27
1592	WBGene00001737	1.66362	0.389259	0.321618	1.21031	0.226159	0.358691	chrV	3551346	3551865	-	grl-28
1593	WBGene00001738	0.159552	0.0481748	0.155136	0.310532	0.756156	NA	chrV	3554611	3555236	-	grl-29
1594	WBGene00001739	0.230004	0.0481748	0.155136	0.310532	0.756156	NA	chrV	3556286	3556804	+	grl-30
1595	WBGene00001740	335.637	0.0532962	0.120683	0.441622	0.658763	0.769659	chrIII	5265113	5267204	+	gro-1
1596	WBGene00001743	525.676	-0.0740214	0.102069	-0.72521	0.468323	0.612155	chrIII	8085705	8088449	+	grp-1
1597	WBGene00001744	5813.38	-0.109628	0.0655211	-1.67317	0.0942931	0.186107	chrIII	5159729	5163627	-	gars-1
1598	WBGene00001745	1725.26	0.199379	0.0775836	2.56986	0.010174	0.0307035	chrI	1068484	1075010	+	gsa-1
1599	WBGene00001746	1213.9	-0.196409	0.123134	-1.59508	0.110695	0.210303	chrI	12819216	12825562	+	gsk-3
1600	WBGene00001747	2711.08	-0.315308	0.0833939	-3.78095	0.000156228	0.000858439	chrV	10682422	10686537	+	gsp-1
1601	WBGene00001748	9529.6	0.237687	0.0751552	3.16262	0.00156359	0.00629398	chrIII	7336587	7338765	+	gsp-2
1602	WBGene00001749	8563.1	1.08925	0.14965	7.27868	3.37109e-13	9.80568e-12	chrIII	9059314	9060181	+	gst-1
1603	WBGene00001750	61.4113	0.264246	0.258315	1.02296	0.306328	0.450104	chrIV	10140330	10141513	-	gst-2
1604	WBGene00001751	108.86	0.0667273	0.190791	0.34974	0.726534	0.819285	chrIV	10139380	10140285	-	gst-3
1605	WBGene00001752	891.663	-0.03194	0.190542	-0.167627	0.866877	0.916524	chrIV	10142135	10143099	+	gst-4
1606	WBGene00001753	2831.08	-0.368664	0.143387	-2.57112	0.0101371	0.0306073	chrII	10950350	10951604	+	gst-5
1607	WBGene00001754	2485.35	0.108886	0.0833467	1.30643	0.191407	0.31682	chrII	4879885	4881105	+	gst-6
1609	WBGene00001755	4233.96	0.389424	0.0730386	5.33176	9.72665e-08	1.153e-06	chrII	4882062	4883358	+	gst-7
1611	WBGene00001756	117.408	3.48407	0.287227	12.13	7.32604e-34	1.0706e-31	chrII	4883749	4884602	+	gst-8
1612	WBGene00001757	43.2727	0.344573	0.303001	1.1372	0.255455	0.393379	chrII	4891573	4893573	+	gst-9
1613	WBGene00001758	3977.77	-0.208451	0.130387	-1.59871	0.109884	0.209089	chrV	2561690	2564701	+	gst-10
1619	WBGene00001759	110.183	-0.392935	0.195832	-2.00649	0.0448035	0.10335	chrX	3632367	3633747	-	gst-11
1620	WBGene00001760	574.345	-0.306387	0.185007	-1.65608	0.097706	0.191276	chrII	13616685	13618061	-	gst-12
1621	WBGene00001761	2179.06	0.714929	0.117358	6.09187	1.11602e-09	1.87375e-08	chrII	9231457	9232340	+	gst-13
1622	WBGene00001762	408.693	-0.0245976	0.175706	-0.139993	0.888666	0.931286	chrII	13614788	13616100	-	gst-14
1623	WBGene00001763	199.728	1.12565	0.172456	6.52715	6.70321e-11	1.36508e-09	chrII	13611771	13613196	-	gst-15
1624	WBGene00001764	79.2441	0.137841	0.236317	0.583288	0.559699	0.690976	chrII	13622967	13624502	-	gst-16
1625	WBGene00001765	50.2267	-0.320767	0.26368	-1.2165	0.223793	0.355808	chrII	13628017	13628774	-	gst-17
1626	WBGene00001766	81.4026	-0.317078	0.236618	-1.34005	0.18023	0.302848	chrII	13629799	13630887	-	gst-18
1627	WBGene00001767	34.2165	0.163787	0.311967	0.525014	0.599574	0.723314	chrII	13625544	13627141	-	gst-19
1628	WBGene00001768	4800.53	0.536097	0.112242	4.77627	1.78579e-06	1.5975e-05	chrII	13608154	13609824	-	gst-20
1629	WBGene00001769	43.8739	-0.384016	0.274038	-1.40132	0.161117	0.279393	chrV	1730759	1732000	-	gst-21
1630	WBGene00001770	192.519	0.486855	0.172	2.83056	0.00464665	0.0158991	chrV	16231032	16232317	-	gst-22
1631	WBGene00001771	49.1868	-0.0425259	0.265547	-0.160144	0.872767	0.920619	chrV	3243287	3244495	+	gst-23
1632	WBGene00001772	1450.64	0.459308	0.107213	4.28405	1.83522e-05	0.000129687	chrII	13610443	13611349	-	gst-24
1633	WBGene00001773	9.11246	0.21209	0.396522	0.534875	0.592737	0.717862	chrI	1451122	1453077	-	gst-25
1634	WBGene00001774	1962.37	0.0880908	0.0793546	1.11009	0.26696	0.406312	chrII	15163808	15164646	-	gst-26
1635	WBGene00001775	3456.19	0.155974	0.0683395	2.28233	0.0224696	0.0594428	chrII	15164890	15165731	-	gst-27
1636	WBGene00001776	821.697	-0.347959	0.0974042	-3.57232	0.000353834	0.0017389	chrII	15166194	15167406	-	gst-28
1637	WBGene00001777	24.5398	-0.0182769	0.356468	-0.0512723	0.959109	0.974581	chrII	15168538	15169860	-	gst-29
1638	WBGene00001778	18.5092	0.510838	0.378474	1.34973	0.177102	0.299161	chrII	4933883	4935038	-	gst-30
1639	WBGene00001779	33.749	-0.433537	0.309094	-1.4026	0.160735	0.278943	chrII	15174271	15174965	-	gst-31
1640	WBGene00001780	7.71565	-0.327799	0.405378	-0.808624	0.418731	0.565877	chrII	15177372	15178594	-	gst-32
1641	WBGene00001781	80.2699	0.0610033	0.235907	0.258591	0.795951	0.869327	chrV	3467453	3468545	-	gst-33
1642	WBGene00001782	19.0094	-0.829192	0.358725	-2.3115	0.0208055	0.0558492	chrII	15179971	15183232	-	gst-34
1643	WBGene00001783	88.6146	-0.539614	0.224598	-2.40257	0.0162801	0.0456399	chrII	15183801	15185385	-	gst-35
1644	WBGene00001784	3965.23	1.50859	0.129987	11.6057	3.85413e-31	4.88912e-29	chrX	9861646	9862960	-	gst-36
1645	WBGene00001785	3.65474	0.281511	0.389697	0.722385	0.470058	0.613368	chrV	1921621	1922381	+	gst-37
1646	WBGene00001786	1001.46	0.363383	0.114534	3.17271	0.00151023	0.00611288	chrV	15915216	15916079	-	gst-38
1647	WBGene00001787	551.099	0.208993	0.105038	1.98968	0.0466259	0.106807	chrII	15171163	15171912	-	gst-39
1648	WBGene00001788	355.468	1.65923	0.235108	7.05729	1.69785e-12	4.46254e-11	chrIV	760610	762342	+	gst-40
1649	WBGene00001789	212.41	-0.55228	0.170532	-3.23857	0.0012013	0.00501472	chrV	7398390	7399302	-	gst-41
1652	WBGene00001790	1431.01	0.272699	0.086267	3.1611	0.00157176	0.0063213	chrX	11726271	11727936	-	gst-42
1653	WBGene00001791	321.934	-0.232497	0.124367	-1.86944	0.0615617	0.133446	chrI	2901325	2903006	+	gst-43
1654	WBGene00001792	21.7276	1.05721	0.360718	2.93085	0.00338041	0.0121507	chrV	16390891	16392406	+	gst-44
1655	WBGene00001793	4687.74	0.0113776	0.0706448	0.161054	0.872051	0.920157	chrII	12866448	12878116	-	gsy-1
1656	WBGene00001794	17407.1	0.292464	0.0678974	4.30745	1.65148e-05	0.000118165	chrIV	10180660	10183939	+	gta-1
1657	WBGene00001795	5810.34	0.268707	0.0739153	3.63534	0.000277618	0.00141103	chrIV	11248884	11259535	-	gtl-1
1658	WBGene00001796	936.391	0.308839	0.10751	2.87266	0.00407035	0.014233	chrIV	11273483	11281924	+	gtl-2
1659	WBGene00001803	182.425	-0.194933	0.169436	-1.15048	0.249946	0.38682	chrX	6226131	6230701	-	lite-1
1660	WBGene00001804	12.5292	0.337846	0.381037	0.886648	0.375269	0.522527	chrX	10402526	10406303	-	gur-3
1661	WBGene00001805	161.455	0.228686	0.166333	1.37487	0.169172	0.289469	chrII	14104773	14108072	+	gur-4
1662	WBGene00001806	21.3475	0.344368	0.357986	0.961959	0.33607	0.482549	chrII	5285329	5288908	+	gur-5
1663	WBGene00001808	335.116	-0.112372	0.121784	-0.922715	0.356156	0.502422	chrV	13497690	13498819	+	gut-2
1664	WBGene00001811	180.834	-0.103879	0.163785	-0.634238	0.525925	0.663197	chrIV	17376427	17379317	+	haf-1
1665	WBGene00001812	1518.78	0.138598	0.0834737	1.66038	0.0968383	0.190046	chrII	7353576	7356426	-	haf-2
1666	WBGene00001813	2722.77	0.161475	0.0892786	1.80867	0.0705028	0.148407	chrV	15760426	15766172	-	haf-3
1667	WBGene00001814	10904.4	-0.262203	0.0725702	-3.61309	0.000302566	0.00152091	chrI	489969	496150	+	haf-4
1668	WBGene00001815	1542.93	0.0025582	0.119488	0.0214097	0.982919	0.989029	chrIII	11091548	11099964	-	hmt-1
1669	WBGene00001816	1588.88	-0.109012	0.0763656	-1.4275	0.153437	0.269374	chrI	1162880	1175868	-	haf-6
1670	WBGene00001817	1037.3	0.0359015	0.109015	0.329326	0.741909	0.831082	chrV	14773258	14777697	+	haf-7
1671	WBGene00001818	1.55332	0.361578	0.255515	1.4151	0.15704	0.27391	chrIV	14694032	14699940	-	haf-8
1673	WBGene00001819	12294.9	0.0152137	0.063877	0.238172	0.811747	0.879541	chrI	6081782	6085962	+	haf-9
1674	WBGene00001820	660.06	-0.295689	0.141056	-2.09625	0.0360598	0.0866533	chrIV	12542034	12545729	+	ham-1
1675	WBGene00001821	369.718	-0.463232	0.134977	-3.43193	0.000599292	0.00275256	chrX	4554691	4559404	+	ham-2
1676	WBGene00001823	522.144	0.303066	0.106657	2.8415	0.00449017	0.0154345	chrIII	5263943	5264996	+	hap-1
1677	WBGene00001824	1537.06	-0.101247	0.0957424	-1.05749	0.290286	0.432411	chrX	5822277	5827755	+	hbl-1
1678	WBGene00001827	1993.97	-0.297809	0.07655	-3.89038	0.000100087	0.000581514	chrIV	7770770	7774275	-	hcf-1
1679	WBGene00001828	1.00912	0.2867	0.232393	1.23369	0.21732	NA	chrX	14696412	14699977	-	hch-1
1680	WBGene00001829	1356.64	-0.479584	0.0924537	-5.18729	2.13379e-07	2.3623e-06	chrV	6594194	6599208	+	hcp-1
1681	WBGene00001830	921.649	-0.45226	0.106704	-4.23846	2.2506e-05	0.000155522	chrV	9645746	9650297	+	hcp-2
1682	WBGene00001831	387.597	0.113456	0.125067	0.90716	0.364322	0.510871	chrIII	9615306	9616470	-	hcp-3
1683	WBGene00001832	1023.05	-0.317938	0.0854901	-3.719	0.00020001	0.00106487	chrI	3862775	3865938	-	hcp-4
1684	WBGene00001833	1233.65	-0.110666	0.0856008	-1.29281	0.196077	0.322533	chrI	5165152	5171313	+	hcp-6
1685	WBGene00001834	1299.99	-0.503441	0.0812067	-6.19949	5.66457e-10	9.99756e-09	chrV	14525389	14527411	+	hda-1
1686	WBGene00001835	452.437	-0.24915	0.130287	-1.91232	0.0558355	0.123391	chrII	8020780	8022561	-	hda-2
1687	WBGene00001836	829.412	0.180753	0.100598	1.79679	0.0723692	0.151671	chrI	11912791	11917719	-	hda-3
1688	WBGene00001837	953.692	-0.299505	0.112026	-2.67354	0.0075056	0.0238443	chrX	16729559	16744698	+	hda-4
1689	WBGene00001838	510.982	0.0317038	0.104477	0.303453	0.761545	0.845353	chrII	13882705	13888031	+	hda-10
1690	WBGene00001839	81.3467	4.57659	0.341605	13.3973	6.26941e-41	1.1568e-38	chrIV	11946106	11949817	-	hdl-1
1691	WBGene00001840	16020.4	0.118969	0.0691492	1.72047	0.0853467	0.172765	chrII	8326852	8328870	-	hel-1
1692	WBGene00001841	30.5016	-0.401024	0.313289	-1.28004	0.20053	0.327851	chrX	7116205	7116996	-	hen-1
1693	WBGene00001842	8.53423	0.415873	0.405378	1.02589	0.304944	0.448648	chrV	9697129	9701552	+	her-1
1694	WBGene00001843	2996.33	-0.209393	0.0742968	-2.81834	0.00482731	0.0163996	chrI	9049460	9055457	-	hgo-1
1695	WBGene00001844	1269.06	-0.445244	0.0850765	-5.23346	1.66367e-07	1.88877e-06	chrX	2489044	2494339	+	hid-1
1696	WBGene00001851	9282.2	-0.3664	0.0717381	-5.10747	3.26506e-07	3.49197e-06	chrV	20780413	20785259	+	hif-1
1697	WBGene00001852	105.71	-0.157593	0.200581	-0.785681	0.432054	0.578618	chrV	14949777	14952796	+	hil-1
1698	WBGene00001853	1136.7	-0.399422	0.0856943	-4.66101	3.14665e-06	2.66852e-05	chrIV	6294234	6295219	+	hil-2
1699	WBGene00001854	553.622	0.333216	0.15653	2.12877	0.0332734	0.0812792	chrX	8159153	8160084	+	hil-3
1700	WBGene00001855	771.044	0.210192	0.106211	1.97899	0.047817	0.108858	chrV	4754313	4755469	+	hil-4
1701	WBGene00001856	1525.5	0.530292	0.0823803	6.43713	1.21758e-10	2.38131e-09	chrI	5774585	5775610	+	hil-5
1702	WBGene00001857	1.4653	-0.000258144	0.32969	-0.00078299	0.999375	0.999758	chrV	2030619	2031475	-	hil-6
1703	WBGene00001858	52.3277	0.351291	0.293033	1.19881	0.230601	0.364013	chrIV	6646034	6646936	+	hil-7
1704	WBGene00001859	15.849	0.366094	0.371945	0.984269	0.324983	0.471148	chrI	5463480	5469627	-	hil-8
1705	WBGene00001860	2658.58	-0.237668	0.0805338	-2.95116	0.00316583	0.0114811	chrI	4951570	4957667	-	him-1
1706	WBGene00001862	110.131	0.0274814	0.188417	0.145854	0.884037	0.927926	chrIV	6977517	6978943	+	him-3
1707	WBGene00001863	22840.6	0.299897	0.0637461	4.70455	2.54424e-06	2.20368e-05	chrX	9717589	9753764	+	him-4
1708	WBGene00001864	70.1425	-1.39187	0.274278	-5.07466	3.8818e-07	4.09404e-06	chrV	14090719	14092435	+	him-5
1709	WBGene00001865	416.87	-0.374533	0.117877	-3.17733	0.00148639	0.00602584	chrIV	12490791	12495298	+	him-6
1710	WBGene00001867	177.165	0.312048	0.277116	1.12605	0.260143	0.399029	chrIV	10561905	10563947	+	him-8
1711	WBGene00001869	286.363	-0.138386	0.157191	-0.880372	0.378658	0.525636	chrIII	5803260	5805112	+	him-10
1712	WBGene00001872	159.611	0.0984739	0.1771	0.556035	0.578187	0.70666	chrII	7065020	7069966	-	him-14
1713	WBGene00001874	1471.48	-0.229431	0.0851638	-2.69399	0.00706021	0.022642	chrV	13176711	13180189	+	him-17
1714	WBGene00001875	6175.72	0.566285	0.0852009	6.64647	3.002e-11	6.50504e-10	chrV	16042486	16043013	+	his-1
1719	WBGene00001876	3469.68	0.4185	0.0925433	4.52221	6.11985e-06	4.83736e-05	chrV	16041828	16042283	-	his-2
1726	WBGene00001877	4015.1	0.103568	0.092014	1.12557	0.260346	0.399188	chrV	16040771	16041288	+	his-3
1727	WBGene00001878	2701.94	0.133741	0.0837296	1.59729	0.110201	0.209539	chrV	16040029	16040548	-	his-4
1728	WBGene00001879	7173.01	0.462087	0.0878676	5.2589	1.44917e-07	1.65968e-06	chrV	8535177	8535662	+	his-5
1733	WBGene00001880	4444.34	0.475485	0.0882008	5.39094	7.00909e-08	8.50731e-07	chrV	8534387	8534977	-	his-6
1740	WBGene00001881	6836.19	0.365113	0.102635	3.55738	0.000374567	0.00182824	chrV	8533379	8533869	+	his-7
1741	WBGene00001882	1794.38	0.13372	0.0935281	1.42973	0.152793	0.268502	chrV	8532540	8533098	-	his-8
1742	WBGene00001883	2441.52	-0.155715	0.111369	-1.39819	0.162055	0.280567	chrII	13823648	13824058	+	his-9
1749	WBGene00001884	3086.33	-0.104442	0.0938429	-1.11295	0.26573	0.405086	chrII	13823064	13823375	-	his-10
1750	WBGene00001885	11381.5	0.138782	0.0755357	1.8373	0.0661655	0.141164	chrII	13821778	13822333	+	his-11
1759	WBGene00001886	5260.55	0.0544119	0.09161	0.593951	0.552545	0.68543	chrII	13821198	13821581	-	his-12
1760	WBGene00001887	2441.52	-0.155715	0.111369	-1.39819	0.162055	0.280567	chrII	13820210	13820620	+	his-13
1767	WBGene00001888	3086.33	-0.104442	0.0938429	-1.11295	0.26573	0.405086	chrII	13819626	13819937	-	his-14
1768	WBGene00001889	6129.74	0.22735	0.0869957	2.61335	0.00896603	0.0276333	chrII	13818371	13818739	+	his-15
1769	WBGene00001890	4214.76	-0.0408433	0.104629	-0.390362	0.696269	0.797514	chrII	13817759	13818143	-	his-16
1770	WBGene00001891	4445.68	0.388163	0.118273	3.28193	0.001031	0.00440053	chrV	8897458	8897992	-	his-17
1777	WBGene00001892	9478.21	0.246165	0.0877235	2.80615	0.00501372	0.0169603	chrV	8898195	8898645	+	his-18
1782	WBGene00001893	4484.11	0.326934	0.0871025	3.75344	0.000174424	0.00094602	chrV	8895765	8896148	+	his-19
1783	WBGene00001894	4044.46	0.122731	0.086871	1.4128	0.157714	0.27464	chrV	8895101	8895472	-	his-20
1784	WBGene00001895	4484.39	0.32673	0.087139	3.74953	0.000177167	0.000958058	chrV	8891883	8892266	-	his-21
1785	WBGene00001896	4044.46	0.122731	0.086871	1.4128	0.157714	0.27464	chrV	8892559	8892930	+	his-22
1786	WBGene00001898	2101.77	0.342074	0.102581	3.33468	0.000853987	0.00373964	chrX	14490094	14491115	+	his-24
1787	WBGene00001899	4033.55	-0.171131	0.0845494	-2.02404	0.0429664	0.0998987	chrII	13824686	13825294	-	his-25
1794	WBGene00001900	3086.33	-0.104442	0.0938429	-1.11295	0.26573	0.405086	chrII	13825532	13825843	+	his-26
1795	WBGene00001901	6657.62	0.5099	0.0959451	5.3145	1.06953e-07	1.2564e-06	chrV	8890038	8890448	+	his-27
1802	WBGene00001902	2792.51	0.0888603	0.113093	0.785728	0.432027	0.578618	chrV	8889488	8889799	-	his-28
1807	WBGene00001903	482.595	-0.0515078	0.1193	-0.431751	0.665922	0.775494	chrIV	8331044	8331412	-	his-29
1808	WBGene00001904	72.6767	-1.18274	0.25695	-4.60302	4.16413e-06	3.42178e-05	chrIV	8331666	8332049	+	his-30
1809	WBGene00001905	226.825	-1.46834	0.151119	-9.71643	2.5662e-22	1.8676e-20	chrIV	8333557	8334021	-	his-31
1810	WBGene00001906	1768.84	-0.0928473	0.109092	-0.851091	0.394719	0.542476	chrIV	8334298	8334862	+	his-32
1817	WBGene00001907	72.6767	-1.18274	0.25695	-4.60302	4.16413e-06	3.42178e-05	chrIV	8335335	8335718	-	his-33
1818	WBGene00001908	482.595	-0.0515078	0.1193	-0.431751	0.665922	0.775494	chrIV	8335972	8336340	+	his-34
1827	WBGene00001909	3826.36	0.752787	0.0816835	9.2159	3.08684e-20	1.91144e-18	chrV	9544611	9545398	-	his-35
1828	WBGene00001910	819.946	2.57582	0.20985	12.2746	1.24069e-34	1.90451e-32	chrV	9546092	9546838	+	C50F4.6
1829	WBGene00001911	2122.76	0.288493	0.0887381	3.25106	0.00114977	0.00483046	chrV	9547083	9547607	+	his-37
1830	WBGene00001912	339.337	0.48213	0.146977	3.2803	0.00103697	0.0044234	chrX	7309413	7309908	-	his-38
1835	WBGene00001913	42.4423	1.6865	0.360706	4.67556	2.93156e-06	2.50823e-05	chrV	8536513	8536716	+	his-39
1836	WBGene00001914	540.522	0.35039	0.106257	3.29758	0.000975216	0.00420061	chrX	7310110	7310698	+	his-40
1843	WBGene00001915	3289.94	1.24232	0.0848421	14.6428	1.49798e-48	3.60047e-46	chrV	9545494	9546264	+	his-41
1844	WBGene00001916	45.379	2.1809	0.321397	6.78568	1.15543e-11	2.68527e-10	chrII	13828287	13828697	-	his-42
1851	WBGene00001917	5260.55	0.0544119	0.09161	0.593951	0.552545	0.68543	chrII	13827326	13827709	+	his-43
1852	WBGene00001918	6129.74	0.22735	0.0869957	2.61335	0.00896603	0.0276333	chrII	13826730	13827098	-	his-44
1861	WBGene00001919	13151.2	0.248159	0.0857497	2.89399	0.0038038	0.0134476	chrIV	11326557	11327090	+	his-45
1868	WBGene00001920	6829.46	-0.171012	0.106357	-1.6079	0.107858	0.206084	chrIV	11326018	11326329	-	his-46
1869	WBGene00001921	3.87243	0.171723	0.354937	0.483813	0.628518	0.746304	chrIV	11323885	11324470	-	his-47
1870	WBGene00001922	6273.06	-0.557715	0.0779582	-7.15403	8.42679e-13	2.32526e-11	chrIV	11324719	11325222	+	his-48
1871	WBGene00001923	6657.45	0.509839	0.0959322	5.31457	1.06907e-07	1.2564e-06	chrV	8847943	8848353	+	his-49
1878	WBGene00001924	2792.51	0.0888603	0.113093	0.785728	0.432027	0.578618	chrV	8847393	8847704	-	his-50
1883	WBGene00001925	4483.81	0.326944	0.0870874	3.75421	0.000173891	0.000943972	chrV	8849788	8850171	-	his-51
1884	WBGene00001926	4044.46	0.122731	0.086871	1.4128	0.157714	0.27464	chrV	8850464	8850835	+	his-52
1885	WBGene00001927	4483.95	0.326842	0.0871056	3.75225	0.000175253	0.000948826	chrV	8853670	8854053	+	his-53
1886	WBGene00001928	49.7392	0.906639	0.329132	2.75464	0.00587574	0.0194703	chrV	8853006	8853431	-	his-54
1887	WBGene00001929	70.8536	0.933551	0.314612	2.96731	0.00300422	0.0109888	chrIV	11337733	11338295	-	his-55
1894	WBGene00001930	6829.69	-0.170912	0.10633	-1.60738	0.10797	0.206135	chrIV	11338522	11338833	+	his-56
1895	WBGene00001931	10387.9	0.241069	0.0835008	2.88702	0.00388907	0.0137014	chrIV	11340412	11341703	+	his-57
1904	WBGene00001932	1657.28	1.54044	0.40176	3.83423	0.000125958	0.000707745	chrIV	11339630	11340132	-	his-58
1905	WBGene00001933	8397.5	0.404244	0.0868424	4.65491	3.24117e-06	2.73977e-05	chrIV	7488216	7488956	+	his-59
1912	WBGene00001934	7149.23	-0.384627	0.0812069	-4.73638	2.17564e-06	1.90611e-05	chrIV	7487560	7488025	-	his-60
1913	WBGene00001935	2892.35	-0.286145	0.0719656	-3.97614	7.0043e-05	0.000425803	chrIV	7485733	7486254	-	his-61
1914	WBGene00001936	6195.51	-0.0482859	0.0842233	-0.573308	0.566436	0.696539	chrIV	7486519	7486962	+	his-62
1915	WBGene00001937	4365.35	-0.0690274	0.0950681	-0.726084	0.467787	0.611673	chrIV	11406365	11406893	-	his-63
1922	WBGene00001938	9669.76	0.194684	0.0853734	2.28038	0.0225849	0.05967	chrIV	11407084	11407496	+	his-64
1923	WBGene00001939	11120.5	0.0929876	0.121216	0.767122	0.443009	0.588532	chrIV	11401059	11401564	+	his-65
1924	WBGene00001940	9046.92	-1.02074	0.279436	-3.65288	0.000259319	0.00133398	chrIV	11400311	11400812	-	his-66
1925	WBGene00001941	1325.5	-0.458368	0.0959301	-4.77815	1.76915e-06	1.58729e-05	chrI	9988341	9988826	-	his-67
1926	WBGene00001942	461.54	0.0174365	0.116856	0.149213	0.881385	0.926207	chrI	9989061	9989617	+	his-68
1927	WBGene00001943	8.70959	0.680477	0.399652	1.70268	0.0886287	0.177617	chrIII	4058272	4058743	-	his-69
1928	WBGene00001944	4.15622	1.27752	0.381918	3.34501	0.000822798	0.00361995	chrIII	4059647	4060172	-	his-70
1929	WBGene00001945	1958.66	0.0847468	0.0734183	1.1543	0.248377	0.384858	chrX	7981382	7982070	-	his-71
1930	WBGene00001946	4478.59	0.0993141	0.0934597	1.06264	0.287945	0.430011	chrIII	12367474	12369050	-	his-72
1931	WBGene00001947	25.1977	-0.296715	0.331412	-0.895306	0.370624	0.517836	chrII	13183450	13183845	+	his-73
1932	WBGene00001948	288.118	0.0141801	0.160419	0.0883942	0.929563	0.957841	chrII	4518560	4522523	+	hlh-1
1933	WBGene00001949	274.594	-0.294476	0.131243	-2.24375	0.0248488	0.0645038	chrI	7190834	7193924	-	hlh-2
1934	WBGene00001950	14.8764	-0.0385453	0.374117	-0.10303	0.917939	0.95003	chrII	9086608	9087917	+	hlh-3
1935	WBGene00001951	21.6022	1.30751	0.356436	3.66829	0.000244178	0.00127113	chrIII	9737469	9738839	-	hlh-4
1936	WBGene00001952	18.598	0.168789	0.351158	0.480664	0.630755	0.748182	chrII	9613463	9614812	-	hlh-6
1937	WBGene00001953	23.8355	-0.279989	0.335247	-0.835175	0.403619	0.551246	chrX	8116636	8120133	+	hlh-8
1938	WBGene00001954	10.7655	-0.172247	0.390561	-0.441025	0.659195	0.770065	chrV	9280702	9282154	-	hlh-10
1939	WBGene00001955	2351.54	0.281524	0.10443	2.69581	0.0070218	0.0225465	chrIII	9619711	9626537	+	hlh-11
1940	WBGene00001956	22.2589	0.231488	0.340101	0.680644	0.496097	0.636524	chrIV	8478577	8479446	-	hlh-12
1942	WBGene00001957	8.65612	-0.0689005	0.398067	-0.173088	0.862582	0.913479	chrX	4249249	4250764	+	hlh-13
1943	WBGene00001958	2.38223	-0.215066	0.369694	-0.581739	0.560742	0.691836	chrII	5737790	5738888	-	hlh-14
1944	WBGene00001959	5.21269	0.532668	0.39882	1.33561	0.181677	0.304775	chrX	2412953	2413377	-	hlh-15
1945	WBGene00001960	24.6048	0.367684	0.332754	1.10497	0.269173	0.40876	chrI	8767019	8768042	-	hlh-16
1946	WBGene00001961	10.0869	-0.443006	0.394928	-1.12174	0.261974	0.400963	chrIV	16254764	16256274	+	hlh-17
1947	WBGene00001962	0.159552	0.0481748	0.155136	0.310532	0.756156	NA	chrX	555788	557191	-	hlh-19
1948	WBGene00001964	1.32822	0.362027	0.255693	1.41587	0.156815	0.273673	chrII	5535240	5536149	+	hlh-25
1949	WBGene00001965	0.478657	0.113643	0.155621	0.730255	0.465234	NA	chrII	5532857	5533738	-	hlh-26
1950	WBGene00001966	16.6467	2.85271	0.397874	7.1699	7.50517e-13	2.08671e-11	chrII	5539081	5540211	-	hlh-27
1951	WBGene00001967	1.7156	-0.0110214	0.303614	-0.0363007	0.971043	0.982035	chrX	17551057	17551877	+	hlh-28
1952	WBGene00001968	0.500968	-0.0368037	0.18137	-0.202921	0.839197	NA	chrX	17547817	17548637	-	hlh-29
1953	WBGene00001971	2395.86	-0.113686	0.105507	-1.07752	0.281249	0.422905	chrII	14250683	14251448	+	hmg-1.1
1954	WBGene00001972	2129.65	-0.0856847	0.0736068	-1.16409	0.244389	0.379905	chrIII	6280380	6282411	+	hmg-1.2
1955	WBGene00001973	431.817	0.171986	0.1106	1.55502	0.119941	0.223934	chrI	5815609	5818132	-	hmg-3
1956	WBGene00001974	1828.71	0.166802	0.0743048	2.24484	0.0247784	0.064376	chrIII	7379143	7381609	-	hmg-4
1957	WBGene00001975	661.068	0.201893	0.104484	1.93229	0.053324	0.118688	chrIV	7644895	7646219	-	hmg-5
1958	WBGene00001976	1860.19	-0.203576	0.0924042	-2.2031	0.0275876	0.0700753	chrII	4672798	4673746	+	hmg-11
1959	WBGene00001977	1324.54	-0.0537103	0.0899478	-0.597127	0.550422	0.683938	chrII	11916513	11917643	+	hmg-12
1960	WBGene00001978	2174.47	-0.545713	0.0806095	-6.76984	1.28927e-11	2.96239e-10	chrV	11845877	11852165	+	hmp-1
1961	WBGene00001979	1607.68	-0.123018	0.0863998	-1.42383	0.154497	0.27074	chrI	14738882	14742657	+	hmp-2
1962	WBGene00001980	9933.93	-0.423113	0.0688874	-6.14209	8.14405e-10	1.40878e-08	chrI	11075758	11134667	-	hmr-1
1963	WBGene00001981	2.86213	0.873336	0.347783	2.51115	0.0120337	0.0354206	chrX	11684661	11685778	+	hnd-1
1964	WBGene00001983	3012.15	-0.139198	0.0897029	-1.55177	0.120717	0.22506	chrIV	4739490	4744269	-	hoe-1
1965	WBGene00001984	81.1961	-0.379008	0.225457	-1.68107	0.0927494	0.183798	chrX	5851954	5854260	-	hog-1
1966	WBGene00001985	51.2274	0.189486	0.25595	0.740323	0.459104	0.603386	chrI	4208515	4210341	-	hop-1
1967	WBGene00001986	211.336	-0.140271	0.148087	-0.947221	0.343526	0.490326	chrV	14621135	14629384	+	hot-1
1968	WBGene00001987	184.336	-0.468796	0.159699	-2.93549	0.00333017	0.0119914	chrV	19174806	19187899	+	hot-2
1969	WBGene00001988	61.8939	-0.96545	0.259035	-3.72711	0.000193688	0.00103453	chrII	13930648	13931997	-	hot-3
1970	WBGene00001989	108.86	-1.1664	0.219438	-5.31539	1.06429e-07	1.25186e-06	chrIII	6220537	6224451	+	hot-4
1971	WBGene00001990	87.6932	-0.463828	0.216603	-2.14137	0.032244	0.0793268	chrI	8683220	8687217	-	hot-5
1972	WBGene00001991	112.678	-0.576846	0.190035	-3.03548	0.00240152	0.00905742	chrV	11021069	11022884	-	hot-6
1973	WBGene00001992	56.3328	-0.961095	0.303006	-3.17187	0.0015146	0.00612784	chrII	14211439	14213123	+	hot-7
1974	WBGene00001993	11514	0.461996	0.0782981	5.90047	3.62463e-09	5.59688e-08	chrIII	10535526	10537682	+	hpd-1
1975	WBGene00001994	2961.19	-0.425204	0.077968	-5.45358	4.9367e-08	6.1724e-07	chrX	4210573	4217290	-	hpk-1
1983	WBGene00001995	201.455	0.0404843	0.1795	0.225539	0.82156	0.886336	chrX	13245390	13247044	+	hpl-1
1984	WBGene00001996	902.001	0.307709	0.10766	2.85815	0.00426124	0.0147727	chrIII	10752254	10755523	-	hpl-2
1985	WBGene00001997	152.897	0.103567	0.166479	0.622101	0.533875	0.670575	chrIII	10621541	10626398	+	hpr-9
1986	WBGene00001998	128.036	0.166358	0.179374	0.927437	0.3537	0.499964	chrII	13153461	13157093	-	hpr-17
1987	WBGene00001999	6447.04	-0.0571233	0.0690053	-0.82781	0.407778	0.555555	chrIV	3336927	3338867	-	hrp-1
1988	WBGene00002000	10225.3	0.0514278	0.0694584	0.740412	0.45905	0.603386	chrI	12060271	12064897	-	hrp-2
1989	WBGene00002001	4163.15	0.127542	0.0679425	1.87721	0.0604889	0.131589	chrIV	10858957	10861295	+	hars-1
1990	WBGene00002002	592.935	0.00684894	0.104853	0.0653194	0.94792	0.968437	chrIV	12565983	12567226	-	hsb-1
1991	WBGene00002003	710.403	-0.606829	0.113038	-5.36836	7.94557e-08	9.56768e-07	chrIII	4345339	4350079	+	hse-5
1992	WBGene00002004	899.336	0.058802	0.108754	0.54069	0.588721	0.714753	chrI	11953512	11961984	-	hsf-1
1993	WBGene00002005	152069	0.593832	0.122798	4.83586	1.32571e-06	1.2299e-05	chrIV	17278959	17281330	+	hsp-1
1994	WBGene00002007	77673	-0.10707	0.0779453	-1.37366	0.169548	0.289928	chrX	6089033	6092124	-	hsp-3
1995	WBGene00002008	20902	2.18024	0.146107	14.9222	2.36302e-50	5.99518e-48	chrII	7350121	7352636	-	hsp-4
1996	WBGene00002010	40952	0.354642	0.0835199	4.24619	2.17432e-05	0.000150633	chrV	4824130	4826760	-	hsp-6
1997	WBGene00002011	4901.3	0.12108	0.0844603	1.43357	0.151695	0.267317	chrIII	8138090	8139645	+	hsp-12.2
1998	WBGene00002012	118.149	3.31903	0.243067	13.6548	1.88969e-42	3.79329e-40	chrIV	9444791	9445507	-	hsp-12.3
1999	WBGene00002013	58.9258	3.72805	0.323455	11.5257	9.78835e-31	1.20003e-28	chrIV	9446385	9446884	-	hsp-12.6
2000	WBGene00002015	163662	5.23502	0.294569	17.7718	1.16929e-70	4.44989e-68	chrV	9087293	9087782	-	hsp-16.1
2001	WBGene00002016	42211.4	4.99092	0.336888	14.8148	1.17584e-49	2.86387e-47	chrV	1804334	1804971	-	hsp-16.2
2002	WBGene00002017	15211.9	5.6468	0.255981	22.0594	7.7582e-108	5.06139e-105	chrV	9090077	9090604	+	hsp-16.11
2003	WBGene00002018	42643.8	5.35856	0.315388	16.9904	9.6749e-65	3.2728e-62	chrV	1805178	1805875	+	hsp-16.41
2006	WBGene00002019	60234.2	5.11518	0.284672	17.9687	3.42813e-72	1.36291e-69	chrV	9088131	9088617	+	hsp-16.48
2009	WBGene00002020	60235.8	5.1152	0.284674	17.9686	3.43208e-72	1.36291e-69	chrV	9089280	9089766	-	hsp-16.49
2012	WBGene00002021	2210.29	0.141857	0.0868391	1.63356	0.102351	0.198371	chrV	8384774	8386268	-	hsp-17
2013	WBGene00002023	5098.4	0.237586	0.0654859	3.62805	0.000285573	0.00144663	chrX	6034463	6039496	-	hsp-25
2014	WBGene00002024	2716.93	0.549278	0.153702	3.57366	0.000352021	0.00173092	chrX	6233149	6235541	-	hsp-43
2015	WBGene00002025	53012.4	0.407819	0.0771617	5.28525	1.25534e-07	1.45227e-06	chrIII	1619742	1625797	+	hsp-60
2016	WBGene00002026	49155.1	5.05899	0.340225	14.8695	5.19719e-50	1.30051e-47	chrI	9320325	9322534	-	hsp-70
2018	WBGene00002027	3241.13	-0.0833452	0.0730135	-1.1415	0.25366	0.391154	chrI	9626241	9630848	+	hsr-9
2019	WBGene00002028	706.468	-0.17657	0.0954261	-1.85034	0.0642651	0.13802	chrIV	8688273	8691513	-	hst-1
2020	WBGene00002029	188.867	-0.170394	0.154022	-1.1063	0.268597	0.408157	chrX	11204117	11207155	-	hst-2
2021	WBGene00002030	120.819	-0.0783364	0.183949	-0.425859	0.670211	0.778552	chrII	6165721	6169231	-	hst-3.1
2022	WBGene00002031	159.731	-0.298267	0.172317	-1.73092	0.0834656	0.169675	chrX	5275567	5278813	+	hst-6
2023	WBGene00002032	119.166	-0.135573	0.182222	-0.743997	0.456878	0.601629	chrIV	5390184	5391557	-	htp-1
2024	WBGene00002033	48.8852	0.165555	0.261273	0.633647	0.526311	0.663547	chrIV	6419500	6420898	+	htp-2
2025	WBGene00002034	264.741	-0.0891152	0.136764	-0.651598	0.514661	0.652914	chrI	4827072	4829794	+	htp-3
2026	WBGene00002035	2251.57	-0.10827	0.0879702	-1.23076	0.218414	0.349734	chrI	8845809	8851116	-	hum-1
2027	WBGene00002036	3227.38	-0.390384	0.0674275	-5.78969	7.05179e-09	1.02723e-07	chrV	9386179	9400062	+	hum-2
2028	WBGene00002037	5001.07	0.064489	0.0670441	0.961889	0.336105	0.482549	chrX	11420474	11433524	-	hum-4
2029	WBGene00002038	5229.99	0.11307	0.0920592	1.22823	0.219362	0.350607	chrIII	4029115	4036840	-	hum-5
2030	WBGene00002039	5342.71	-0.517534	0.11498	-4.50109	6.76063e-06	5.2844e-05	chrX	2303082	2314914	+	hum-6
2031	WBGene00002040	2601.55	-0.127842	0.0809426	-1.57941	0.114241	0.215427	chrI	585831	607601	-	hum-7
2032	WBGene00002041	2130.45	0.155721	0.090739	1.71614	0.0861357	0.174053	chrIV	429214	440554	-	hum-8
2033	WBGene00002042	83.0499	0.00442721	0.22589	0.019599	0.984363	0.98977	chrI	3698102	3699300	+	hus-1
2034	WBGene00002043	1076.51	0.156848	0.0860526	1.8227	0.0683495	0.144926	chrIV	8539123	8544403	+	hyl-1
2035	WBGene00002044	1113.03	-0.284705	0.0982565	-2.89757	0.00376067	0.0133132	chrX	4696952	4699461	-	hyl-2
2036	WBGene00002045	39262.5	0.277986	0.0745882	3.72694	0.000193816	0.00103491	chrII	6587577	6588679	-	icd-1
2037	WBGene00002046	1251.73	0.103376	0.0810595	1.27531	0.202199	0.329813	chrIV	9094541	9095653	-	icln-1
2038	WBGene00002047	721.551	-0.462586	0.125235	-3.69375	0.000220971	0.00116191	chrI	2304512	2306816	-	icp-1
2039	WBGene00002048	4060.11	-0.727926	0.0954844	-7.6235	2.46887e-14	8.18491e-13	chrIII	5755496	5765815	+	ida-1
2040	WBGene00002050	8491.21	0.257065	0.0701716	3.66338	0.000248913	0.001291	chrX	11271184	11275482	+	ifa-1
2041	WBGene00002051	34.5177	0.0210266	0.315709	0.0666012	0.946899	0.968044	chrX	16267257	16270056	-	ifa-3
2043	WBGene00002052	1827.94	0.103804	0.0839409	1.23663	0.216224	0.346935	chrX	4912308	4915979	-	ifa-4
2044	WBGene00002053	21743	0.22523	0.0593574	3.79447	0.000147962	0.000816315	chrII	5765618	5772084	+	ifb-1
2045	WBGene00002054	30432.9	0.492332	0.106758	4.61168	3.99434e-06	3.29263e-05	chrII	5750190	5754140	+	ifb-2
2046	WBGene00002055	8291.4	0.178515	0.112733	1.58352	0.113303	0.214034	chrV	2881393	2883753	+	ifc-1
2047	WBGene00002056	22061.1	0.462103	0.101165	4.56782	4.92812e-06	3.99388e-05	chrX	642156	654903	-	ifc-2
2048	WBGene00002057	3270.69	0.304281	0.0844553	3.60286	0.000314729	0.00157425	chrX	8820703	8824448	-	ifd-1
2049	WBGene00002058	956.679	0.547291	0.0853563	6.41184	1.43777e-10	2.76752e-09	chrX	813852	815929	-	ifd-2
2051	WBGene00002059	3318.92	0.343762	0.0792215	4.33925	1.4297e-05	0.000104049	chrIII	13343574	13344616	+	ife-1
2052	WBGene00002060	2658.44	0.104738	0.0751108	1.39444	0.163184	0.281876	chrX	381338	382709	-	ife-2
2054	WBGene00002061	1878.79	0.0558938	0.0768813	0.727015	0.467217	0.611277	chrV	6588	7822	-	ife-3
2055	WBGene00002062	298.302	-0.172626	0.130806	-1.31971	0.186931	0.311177	chrX	1104212	1106247	+	ife-4
2056	WBGene00002063	90.1981	0.104784	0.207015	0.506167	0.612739	0.732952	chrII	12280662	12284133	+	ife-5
2057	WBGene00002064	2584.99	0.374463	0.0868138	4.3134	1.60763e-05	0.000115344	chrIII	9745864	9747193	-	iff-1
2058	WBGene00002065	43819.8	0.308946	0.0642955	4.80509	1.54683e-06	1.40927e-05	chrII	8559394	8561352	-	iff-2
2059	WBGene00002066	12770.6	-0.24576	0.0635167	-3.86921	0.000109188	0.000624075	chrII	8217231	8222395	+	ifg-1
2071	WBGene00002067	7355.22	0.170383	0.0863061	1.97417	0.0483628	0.109719	chrX	9675844	9680169	-	ifp-1
2075	WBGene00002068	347.89	-0.215575	0.128716	-1.67481	0.0939714	0.185596	chrII	5054084	5055338	-	ify-1
2076	WBGene00002069	572.726	-0.496131	0.11607	-4.27442	1.91637e-05	0.000134691	chrI	9685398	9688653	+	ikb-1
2077	WBGene00002070	3231.26	-0.244099	0.0851451	-2.86686	0.00414572	0.0144523	chrI	9609501	9611620	-	ile-1
2078	WBGene00002071	1902.48	-0.140068	0.0850068	-1.64773	0.0994088	0.193841	chrX	768596	770776	+	ile-2
2079	WBGene00002072	495.769	-0.389123	0.117337	-3.31627	0.000912278	0.00396398	chrV	11239675	11241780	+	ima-1
2080	WBGene00002073	1920.49	-0.317877	0.116252	-2.73439	0.00624963	0.0205254	chrI	6315233	6317267	+	ima-2
2082	WBGene00002074	4623.57	-0.120281	0.101309	-1.18728	0.235118	0.36939	chrIV	7558726	7561664	-	ima-3
2083	WBGene00002075	2290.11	-0.21847	0.0866959	-2.51996	0.0117367	0.034686	chrI	4920707	4926233	-	imb-1
2084	WBGene00002076	2939.26	-0.205107	0.0700628	-2.92748	0.00341724	0.012259	chrII	14365705	14373899	+	imb-2
2085	WBGene00002077	29800.4	0.0325191	0.0858312	0.378873	0.704782	0.803429	chrI	310981	314989	-	imb-3
2086	WBGene00002078	6779.73	-0.102159	0.0824768	-1.23865	0.215477	0.345972	chrV	7805064	7814656	+	xpo-1
2087	WBGene00002079	2362.08	-0.211907	0.0771473	-2.74678	0.00601829	0.0198584	chrI	318390	323352	-	xpo-2
2088	WBGene00002080	2625.6	-0.24356	0.0672227	-3.62317	0.000291012	0.00147296	chrIV	7916699	7924129	-	xpo-3
2089	WBGene00002081	2677.58	-0.2515	0.0807838	-3.11325	0.00185039	0.00725811	chrIII	9168040	9172802	-	ina-1
2090	WBGene00002083	14836.2	-0.0867906	0.0786811	-1.10307	0.269998	0.409673	chrIII	6930039	6931953	+	inf-1
2091	WBGene00002084	171.088	-0.585198	0.160251	-3.65175	0.000260456	0.00133833	chrIV	10436708	10438410	+	ins-1
2092	WBGene00002085	1.49734	0.0188784	0.31245	0.0604205	0.951821	0.970359	chrII	5988526	5989394	+	ins-2
2093	WBGene00002086	35.2888	-1.35274	0.303075	-4.46339	8.06736e-06	6.21537e-05	chrII	5990103	5990818	-	ins-3
2094	WBGene00002087	303.26	-1.02572	0.199653	-5.13752	2.7839e-07	3.01086e-06	chrII	5996370	5997007	+	ins-4
2096	WBGene00002088	77.5788	-0.463392	0.235313	-1.96926	0.0489231	0.110672	chrII	5997803	5999019	+	ins-5
2097	WBGene00002089	52.8237	-1.43896	0.317313	-4.53483	5.76502e-06	4.57991e-05	chrII	6000421	6001009	+	ins-6
2099	WBGene00002090	5.66281	-0.369327	0.405067	-0.911768	0.361891	0.508395	chrIV	9682013	9682826	-	ins-7
2100	WBGene00002091	0.716612	0.216009	0.206199	1.04758	0.294834	NA	chrIV	9680387	9680941	-	ins-8
2101	WBGene00002092	11.0813	-0.473194	0.401641	-1.17815	0.238736	0.373596	chrX	8866238	8866640	-	ins-9
2102	WBGene00002093	27.676	-0.40531	0.341686	-1.18621	0.235541	0.369863	chrV	14033950	14034393	+	ins-10
2103	WBGene00002094	7.93578	0.369548	0.405125	0.912183	0.361672	0.508166	chrII	5556761	5557088	+	ins-11
2104	WBGene00002095	8.49971	0.52074	0.404287	1.28804	0.197731	0.324465	chrII	5554617	5555306	+	ins-12
2105	WBGene00002096	165.387	5.3806	0.324034	16.605	6.40866e-62	1.95112e-59	chrII	5544585	5544851	-	ins-13
2106	WBGene00002097	38.1648	-1.21077	0.299312	-4.04516	5.22868e-05	0.000329353	chrII	6745435	6745960	-	ins-14
2107	WBGene00002098	4.43267	0.383215	0.386853	0.990596	0.321883	0.467842	chrII	6744339	6744735	-	ins-15
2108	WBGene00002099	1.96627	-0.0513269	0.351108	-0.146186	0.883775	0.927811	chrIII	2060673	2060957	-	ins-16
2109	WBGene00002100	398.528	-0.496957	0.120169	-4.1355	3.54187e-05	0.000232815	chrIII	4476888	4477583	-	ins-17
2110	WBGene00002101	211.499	-0.777685	0.188577	-4.12396	3.7241e-05	0.000242958	chrI	8147400	8149723	+	ins-18
2111	WBGene00002102	2.14683	0.685447	0.344824	1.98781	0.0468322	0.107103	chrII	3126037	3126441	-	ins-19
2112	WBGene00002103	5.12904	0.461434	0.402365	1.1468	0.251463	0.388488	chrII	6010844	6011321	+	ins-20
2115	WBGene00002104	2.9562	-0.388448	0.381643	-1.01783	0.308758	0.453055	chrIII	10023804	10024120	+	ins-21
2116	WBGene00002105	27.7483	-1.58416	0.357493	-4.4313	9.36645e-06	7.11422e-05	chrIII	10026289	10026673	+	ins-22
2117	WBGene00002106	3.09316	0.118757	0.37587	0.315954	0.752038	0.838162	chrIII	10028247	10028600	+	ins-23
2118	WBGene00002107	158.399	0.705188	0.187411	3.7628	0.000168025	0.000915664	chrI	14031147	14031667	-	ins-24
2119	WBGene00002108	4.30078	0.329149	0.386665	0.851251	0.39463	0.542415	chrI	14020364	14021155	+	ins-25
2120	WBGene00002109	141.324	-0.449355	0.173396	-2.5915	0.00955579	0.0291266	chrI	14037151	14037803	-	ins-26
2121	WBGene00002110	534.789	0.0187861	0.124514	0.150875	0.880075	0.925363	chrI	14027236	14027588	+	ins-27
2122	WBGene00002111	49.1471	0.0799749	0.263008	0.304078	0.761069	0.84503	chrI	14012369	14013629	-	ins-28
2123	WBGene00002112	79.35	-0.0651093	0.226903	-0.286948	0.774152	0.854519	chrI	14018785	14019759	+	ins-29
2124	WBGene00002113	465.997	-0.0882212	0.110171	-0.80077	0.423265	0.57014	chrI	14035096	14036057	-	ins-30
2125	WBGene00002114	8.83702	0.969512	0.403092	2.40519	0.0161642	0.0453867	chrII	3127041	3127790	+	ins-31
2126	WBGene00002115	2.93214	0.425677	0.364952	1.16639	0.243457	0.379006	chrII	3802959	3803324	-	ins-32
2127	WBGene00002116	1676.58	-0.0316529	0.131434	-0.240827	0.80969	0.878145	chrI	13637845	13639311	-	ins-33
2130	WBGene00002117	3.8212	0.269019	0.397067	0.677516	0.498079	0.63844	chrIV	14106584	14107715	+	ins-34
2131	WBGene00002118	399.42	-0.0267894	0.185101	-0.144728	0.884925	0.928538	chrV	20375536	20376301	+	ins-35
2132	WBGene00002119	4.47003	0.336541	0.390798	0.861163	0.389148	0.536817	chrI	11212426	11215091	-	ins-36
2133	WBGene00002120	12.7648	0.911937	0.382245	2.38574	0.0170446	0.0473687	chrII	13835103	13835709	-	ins-37
2134	WBGene00002121	0	NA	NA	NA	NA	NA	chrII	5530501	5530928	+	ins-38
2135	WBGene00002123	1593.53	-0.346106	0.0856351	-4.04163	5.30799e-05	0.000333773	chrX	6943740	6956399	-	inx-1
2136	WBGene00002124	83.5051	0.234462	0.215685	1.08706	0.277011	0.418057	chrX	11294962	11296731	-	inx-2
2137	WBGene00002125	432.129	0.0755397	0.109154	0.692047	0.488908	0.629987	chrX	5996156	5998243	+	inx-3
2139	WBGene00002127	3258.71	-0.231613	0.0790565	-2.92971	0.00339278	0.0121928	chrX	8300030	8302395	-	inx-5
2140	WBGene00002128	1002.99	-0.490603	0.0919473	-5.3357	9.51783e-08	1.13237e-06	chrIV	12746584	12749721	+	inx-6
2141	WBGene00002129	398.034	0.0672984	0.149292	0.450783	0.652146	0.764774	chrIV	5943981	5946754	-	inx-7
2142	WBGene00002130	61.0385	0.918391	0.238857	3.84494	0.000120581	0.000681303	chrIV	11673816	11675635	+	inx-8
2143	WBGene00002131	290.862	-0.150681	0.125086	-1.20462	0.228352	0.361622	chrIV	11676354	11678497	+	inx-9
2144	WBGene00002132	504.957	-0.563131	0.117848	-4.77846	1.76641e-06	1.5856e-05	chrV	9204703	9207467	-	inx-10
2145	WBGene00002133	208.272	-0.307253	0.147789	-2.079	0.0376174	0.0895786	chrV	12487266	12493264	+	inx-11
2146	WBGene00002134	8931.12	-0.0806159	0.0700813	-1.15032	0.250012	0.38682	chrI	3755457	3759077	-	inx-12
2147	WBGene00002135	6741.52	-0.149934	0.0740565	-2.02458	0.0429102	0.0998207	chrI	3748523	3753958	-	inx-13
2148	WBGene00002136	193.043	1.06987	0.157535	6.79133	1.11105e-11	2.59533e-10	chrI	7350312	7352235	-	inx-14
2149	WBGene00002137	2407.95	0.13593	0.0778137	1.74687	0.08066	0.165181	chrI	4159014	4161149	-	inx-15
2150	WBGene00002138	2833.85	0.364547	0.0786638	4.63425	3.5824e-06	2.9977e-05	chrI	4162035	4165015	+	inx-16
2151	WBGene00002139	1020.44	0.0183174	0.0871651	0.210146	0.833554	0.894731	chrI	4165135	4167229	+	inx-17
2152	WBGene00002140	247.319	-0.489783	0.145027	-3.37717	0.000732351	0.0032821	chrIV	606355	614021	+	inx-18
2153	WBGene00002141	69.1217	-0.449087	0.231931	-1.9363	0.0528313	0.117778	chrI	2451908	2464637	-	inx-19
2154	WBGene00002142	63.8033	0.473205	0.282145	1.67717	0.0935092	0.184903	chrI	9874698	9879119	+	inx-20
2155	WBGene00002143	151.718	0.0607997	0.183775	0.330838	0.740767	0.830464	chrI	3611909	3618317	+	inx-21
2156	WBGene00002144	69.5938	0.00381009	0.228025	0.0167091	0.986669	0.991227	chrI	3608395	3612301	+	inx-22
2157	WBGene00002146	1214.55	0.243118	0.0865385	2.80936	0.00496405	0.0167985	chrX	6031469	6034525	+	ipp-5
2158	WBGene00002147	1681.63	-0.429976	0.0779746	-5.51431	3.50156e-08	4.51397e-07	chrII	8112262	8124910	-	ire-1
2159	WBGene00002148	1241.28	-0.0473002	0.0820701	-0.576339	0.564386	0.694914	chrV	6606439	6611158	-	gon-14
2160	WBGene00002149	109.043	-0.411053	0.216533	-1.89834	0.0576517	0.126714	chrX	6766083	6772946	-	irk-1
2161	WBGene00002150	201.085	-0.0653657	0.159533	-0.409732	0.682002	0.787359	chrX	703029	714478	-	irk-2
2162	WBGene00002151	250.419	-0.999018	0.148534	-6.72587	1.74549e-11	3.95593e-10	chrX	14353309	14370370	-	irk-3
2163	WBGene00002152	17604.8	0.0950293	0.0573974	1.65564	0.0977949	0.191347	chrIV	10368607	10373136	+	iars-1
2164	WBGene00002153	2649.26	0.155032	0.0691169	2.24304	0.0248942	0.0645844	chrI	10180249	10184075	+	iars-2
2165	WBGene00002162	17703.6	0.243693	0.0619931	3.93098	8.46017e-05	0.000500784	chrIV	8133789	8136055	-	isp-1
2166	WBGene00002163	975.687	-0.613806	0.118916	-5.16169	2.44732e-07	2.67536e-06	chrX	7126648	7139646	+	ist-1
2167	WBGene00002169	2668.06	-0.182599	0.0807451	-2.26142	0.0237332	0.0621172	chrIII	6703993	6710084	-	isw-1
2168	WBGene00002173	13856.7	0.215772	0.0728987	2.95989	0.00307747	0.0112029	chrIV	7675174	7696923	+	itr-1
2169	WBGene00002174	6819.33	0.134917	0.0793898	1.69942	0.0892396	0.178509	chrI	2802822	2815786	+	itx-1
2170	WBGene00002175	1952.66	-0.219597	0.0794235	-2.76488	0.00569433	0.0189745	chrIV	15997858	16026847	-	jac-1
2171	WBGene00002176	792.665	-0.579536	0.107274	-5.40238	6.57632e-08	8.05698e-07	chrII	1326995	1350136	+	jip-1
2172	WBGene00002177	116.025	-0.690932	0.191272	-3.6123	0.00030349	0.00152429	chrX	5368468	5372059	+	jkk-1
2173	WBGene00002178	730.524	-0.987677	0.108566	-9.09747	9.24608e-20	5.44833e-18	chrIV	6957641	6963716	+	jnk-1
2174	WBGene00002179	4804.09	-0.0775692	0.0703931	-1.10194	0.270486	0.410277	chrI	7946186	7951593	-	jph-1
2175	WBGene00002180	185.76	-0.676239	0.154073	-4.38909	1.13828e-05	8.44898e-05	chrIV	1420929	1421770	+	jtr-1
2176	WBGene00002181	714.744	-0.634861	0.109627	-5.79111	6.99245e-09	1.0204e-07	chrI	14128594	14142207	-	kal-1
2177	WBGene00002182	192.019	-0.258921	0.193231	-1.33995	0.180261	0.302872	chrIII	7339001	7343626	+	kap-1
2178	WBGene00002183	5261.8	0.317212	0.127553	2.48691	0.0128857	0.0374456	chrII	7073796	7075551	+	kat-1
2179	WBGene00002184	224.753	-0.0222322	0.140322	-0.158437	0.874113	0.921427	chrII	11688970	11696003	+	kel-1
2180	WBGene00002185	865.602	0.14474	0.0931677	1.55354	0.120294	0.224432	chrIII	13464829	13471348	+	kel-3
2181	WBGene00002186	14.1155	0.248329	0.37724	0.658278	0.51036	0.649234	chrIII	10098469	10101608	-	kel-10
2182	WBGene00002187	2763.23	0.452092	0.0836156	5.40679	6.41649e-08	7.88232e-07	chrIV	405621	410033	-	kgb-1
2183	WBGene00002188	57.1781	1.05892	0.280838	3.77059	0.000162864	0.000890198	chrIV	3606784	3609229	+	kgb-2
2184	WBGene00002189	3157.24	0.0229918	0.0866136	0.265453	0.79066	0.865213	chrI	14913623	14951924	+	kin-1
2185	WBGene00002190	7069.37	0.0800946	0.0651738	1.22894	0.219095	0.350364	chrX	5970677	5977854	-	kin-2
2186	WBGene00002191	6735.53	0.169762	0.0689552	2.46191	0.0138198	0.0398117	chrI	10734022	10736615	+	kin-3
2187	WBGene00002192	2470.64	-0.280044	0.0844827	-3.31481	0.000917047	0.00398281	chrIV	11425742	11447060	+	kin-4
2188	WBGene00002193	1.09822	0.310913	0.240368	1.29348	0.195843	NA	chrIV	9967095	9969181	-	kin-5
2190	WBGene00002194	39.9088	3.13657	0.3846	8.15542	3.47979e-16	1.45126e-14	chrII	11640454	11641778	+	kin-6
2191	WBGene00002195	220.028	-0.568797	0.176982	-3.21387	0.00130958	0.00541468	chrX	8432663	8437346	+	kin-9
2192	WBGene00002196	4005.79	-0.0572597	0.0727918	-0.786623	0.431502	0.57818	chrI	8288959	8291077	-	kin-10
2193	WBGene00002198	114.016	0.32103	0.244075	1.31529	0.188412	0.312889	chrI	7075918	7079566	-	kin-14
2194	WBGene00002199	765.417	0.191851	0.134067	1.431	0.152429	0.268094	chrII	9431383	9433709	-	kin-15
2195	WBGene00002200	841.887	0.527133	0.132724	3.97165	7.13769e-05	0.00043145	chrII	9434021	9436120	-	kin-16
2196	WBGene00002201	1929.51	0.0899261	0.0846822	1.06192	0.28827	0.43032	chrIII	6118627	6124055	+	kin-18
2197	WBGene00002202	4891.04	0.0652627	0.0834197	0.782341	0.434014	0.580391	chrIII	4084003	4086636	-	kin-19
2198	WBGene00002203	1198.93	-0.314035	0.0964063	-3.25741	0.00112435	0.00473673	chrX	15269074	15281110	-	kin-20
2199	WBGene00002204	2.22593	0.696653	0.34685	2.00852	0.0445886	0.102919	chrIV	9832935	9834822	+	kin-21
2200	WBGene00002205	41.9124	0.258293	0.275582	0.937261	0.348624	0.495372	chrI	11640687	11642206	-	kin-23
2201	WBGene00002206	0.833004	-0.0200746	0.233819	-0.0858554	0.931581	NA	chrIV	9839057	9841084	-	kin-24
2202	WBGene00002207	964.7	-0.306676	0.0964006	-3.18127	0.00146632	0.00595627	chrX	17186380	17193289	+	sid-3
2203	WBGene00002208	2.81599	0.620735	0.311763	1.99105	0.0464754	0.106547	chrIV	7875727	7877881	-	kin-26
2204	WBGene00002210	2037.97	-0.127504	0.0742539	-1.71714	0.0859543	0.173783	chrX	2843922	2852520	-	kin-29
2205	WBGene00002211	119.008	0.417123	0.220641	1.8905	0.0586907	0.128519	chrV	15244756	15247707	+	kin-30
2206	WBGene00002213	761.414	-0.342182	0.0929908	-3.67974	0.000233472	0.00122097	chrI	5086317	5093793	+	kin-32
2207	WBGene00002214	605.861	1.33144	0.109374	12.1733	4.31343e-34	6.51185e-32	chrIV	11083735	11086050	+	klc-1
2208	WBGene00002215	3416.66	-0.0622555	0.0675753	-0.921275	0.356907	0.5032	chrV	5576481	5581713	-	klc-2
2209	WBGene00002216	1564.67	0.184806	0.090255	2.0476	0.0405989	0.095422	chrII	7842353	7845653	+	klp-3
2210	WBGene00002217	4585.47	-0.0693381	0.0614226	-1.12887	0.258953	0.39767	chrX	3171424	3178695	-	klp-4
2211	WBGene00002218	45.6004	0.297376	0.277569	1.07136	0.284009	0.425874	chrIII	5030929	5036548	+	klp-6
2212	WBGene00002219	1320.46	-0.239101	0.0846672	-2.82401	0.00474269	0.0161632	chrIII	10805930	10810999	+	klp-7
2213	WBGene00002220	458.993	-0.363936	0.133609	-2.72388	0.00645191	0.0210346	chrX	3159940	3164424	+	gcc-1
2214	WBGene00002222	400.311	0.249175	0.127364	1.95639	0.0504192	0.113579	chrIV	8756735	8762057	-	klp-11
2215	WBGene00002223	5210.89	-0.0856835	0.0775651	-1.10466	0.269305	0.408893	chrIV	11341325	11359863	-	klp-12
2216	WBGene00002224	108.196	-0.112668	0.187418	-0.601161	0.547733	0.681894	chrX	5984975	5992103	+	klp-13
2217	WBGene00002225	381.06	0.00206394	0.155714	0.0132547	0.989425	0.993446	chrI	5577055	5579394	-	klp-15
2223	WBGene00002226	553.029	-0.210741	0.112874	-1.86706	0.0618936	0.134006	chrI	9512428	9514755	+	klp-16
2229	WBGene00002227	35.4904	0.0865024	0.301663	0.286751	0.774303	0.854634	chrII	11465940	11467641	-	klp-17
2230	WBGene00002228	725.912	-0.0883351	0.0997591	-0.885484	0.375896	0.523127	chrIV	7040211	7043694	+	klp-18
2231	WBGene00002229	1779.21	-0.42374	0.102217	-4.14547	3.39113e-05	0.000224035	chrIII	13302743	13307259	-	klp-19
2232	WBGene00002230	379.969	-0.333129	0.122998	-2.70842	0.00676052	0.021869	chrIII	209992	230450	+	klp-20
2233	WBGene00002231	978.602	-0.607557	0.101973	-5.958	2.55351e-09	4.05255e-08	chrIII	8250636	8254286	+	knl-1
2235	WBGene00002232	2309.13	0.483423	0.148858	3.24755	0.00116405	0.0048826	chrI	11675850	11680975	+	kpc-1
2236	WBGene00002233	253.813	-0.514592	0.139294	-3.6943	0.000220496	0.00115975	chrX	6619022	6628017	+	kqt-1
2237	WBGene00002234	1304.58	0.985225	0.157654	6.24929	4.12318e-10	7.39863e-09	chrX	8243131	8246369	-	kqt-2
2238	WBGene00002235	301.457	-0.856973	0.130112	-6.58643	4.50525e-11	9.52516e-10	chrII	13703877	13712911	+	kqt-3
2239	WBGene00002238	12923.5	-0.0302789	0.0663775	-0.456162	0.648273	0.762179	chrII	7070183	7072415	-	kars-1
2240	WBGene00002239	880.916	-0.361165	0.0895921	-4.03121	5.54897e-05	0.000347491	chrX	8275158	8283301	+	ksr-1
2241	WBGene00002240	216.757	0.0747471	0.146167	0.51138	0.609085	0.730398	chrI	12047469	12059798	-	ksr-2
2242	WBGene00002241	654.612	-0.0224549	0.101806	-0.220565	0.825431	0.888989	chrV	12032257	12040873	-	kup-1
2243	WBGene00002242	237.958	-0.661923	0.156717	-4.22369	2.40335e-05	0.000165045	chrX	7690590	7707086	-	kvs-1
2244	WBGene00002243	763.576	-0.371545	0.128086	-2.90073	0.0037229	0.0132025	chrIV	2964365	2978461	-	lad-2
2245	WBGene00002244	6053.87	-0.245387	0.094781	-2.58899	0.00962566	0.0293168	chrIII	2769358	2779053	-	laf-1
2246	WBGene00002245	834.311	-0.308366	0.104156	-2.96062	0.00307021	0.0111852	chrIV	6095411	6110639	+	lag-1
2247	WBGene00002246	29.1244	-0.391595	0.331754	-1.18038	0.23785	0.372515	chrV	3188350	3189841	+	lag-2
2248	WBGene00002247	15194.2	0.110546	0.113612	0.973011	0.330548	0.476681	chrIV	5173280	5183708	+	lam-1
2249	WBGene00002248	3258.61	-0.321035	0.109265	-2.93813	0.00330202	0.0119111	chrI	10608466	10621433	+	lam-3
2250	WBGene00002249	5271.51	0.213628	0.0723055	2.95452	0.00313154	0.0113748	chrIII	8399190	8401928	-	lap-1
2251	WBGene00002250	4852.51	0.259376	0.099521	2.60625	0.00915405	0.0281179	chrV	13043712	13046355	+	lap-2
2252	WBGene00002251	2545.67	0.0232898	0.104125	0.223671	0.823013	0.887436	chrII	8896841	8908666	+	lat-1
2253	WBGene00002252	632.081	0.363457	0.102849	3.5339	0.000409474	0.00197029	chrII	4359082	4368332	+	lat-2
2254	WBGene00002253	833.123	0.114415	0.13191	0.867373	0.385738	0.533245	chrX	3259087	3259855	+	lbp-1
2258	WBGene00002254	2858.75	0.221038	0.0762345	2.89944	0.00373824	0.0132473	chrX	3260610	3261470	+	lbp-2
2259	WBGene00002255	2155.85	-0.115934	0.0854738	-1.35637	0.174982	0.296511	chrX	3257010	3258155	+	lbp-3
2260	WBGene00002256	1023.71	0.0608017	0.0929346	0.654242	0.512956	0.651379	chrV	7820578	7821477	+	lbp-4
2261	WBGene00002257	1270.06	-0.193831	0.0929151	-2.0861	0.0369692	0.0883804	chrI	6731267	6732280	-	lbp-5
2262	WBGene00002258	17450.3	0.244987	0.0678393	3.61128	0.000304685	0.00152946	chrI	6728290	6729376	-	lbp-6
2263	WBGene00002259	893.767	0.281279	0.0912439	3.08272	0.00205118	0.00792935	chrV	13879552	13880213	+	lbp-7
2264	WBGene00002260	37.422	0.321451	0.341135	0.9423	0.346039	0.492758	chrV	13890679	13891364	+	lbp-8
2265	WBGene00002261	2078.2	-0.540924	0.0775653	-6.9738	3.08501e-12	7.79444e-11	chrX	11028917	11040612	+	ldb-1
2266	WBGene00002262	7371.25	0.222133	0.0672714	3.30205	0.000959824	0.00414592	chrII	11724204	11726533	+	ldh-1
2267	WBGene00002263	14615.2	0.790735	0.103672	7.62732	2.39693e-14	7.96085e-13	chrV	10011871	10028158	+	lea-1
2305	WBGene00002264	9193.01	0.315984	0.114615	2.75693	0.00583469	0.019354	chrII	13195549	13199603	+	lec-1
2306	WBGene00002265	17289.3	0.350676	0.112201	3.12543	0.00177543	0.00700238	chrII	10009608	10016183	-	lec-2
2307	WBGene00002266	3265.03	0.0244741	0.0992141	0.246679	0.805156	0.875047	chrII	9991160	10000350	+	lec-3
2308	WBGene00002267	5537.19	0.137577	0.106801	1.28817	0.197687	0.324423	chrIII	3771425	3773394	-	lec-4
2309	WBGene00002268	8444.06	0.334557	0.0850469	3.9338	8.36139e-05	0.00049574	chrII	5839639	5841134	-	lec-5
2310	WBGene00002269	7658.41	0.651638	0.0915224	7.11998	1.07939e-12	2.92975e-11	chrIII	599509	600366	-	lec-6
2311	WBGene00002270	113	1.37902	0.288057	4.78731	1.69035e-06	1.52257e-05	chrX	9852139	9852909	+	lec-7
2312	WBGene00002271	1525.52	-0.283554	0.159511	-1.77765	0.0754612	0.156731	chrX	9850209	9851375	+	lec-8
2313	WBGene00002272	6335.63	0.147198	0.0841533	1.74916	0.0802632	0.164612	chrX	17600412	17601503	+	lec-9
2314	WBGene00002273	13219.2	0.361809	0.0754171	4.79744	1.60703e-06	1.45686e-05	chrV	6488203	6489120	-	lec-10
2315	WBGene00002274	517.397	0.80287	0.146329	5.48674	4.0943e-08	5.21552e-07	chrIV	6588184	6590307	-	lec-11
2316	WBGene00002275	1341.01	0.00937972	0.0838773	0.111827	0.910961	0.945604	chrII	14063450	14066170	+	lem-2
2317	WBGene00002276	447.628	0.560621	0.151239	3.70685	0.000209856	0.00111082	chrI	9578526	9581267	-	lem-3
2318	WBGene00002278	856.141	0.202715	0.0907703	2.23328	0.0255307	0.0657878	chrIV	992240	998348	+	lep-2
2326	WBGene00002280	90849.2	0.478381	0.0753416	6.34949	2.16033e-10	4.06413e-09	chrX	16380597	16389371	-	let-2
2327	WBGene00002282	1905.42	-1.01528	0.3349	-3.0316	0.00243265	0.00915477	chrX	14577935	14580921	+	let-4
2328	WBGene00002295	6657.59	-0.303431	0.0727375	-4.17159	3.02486e-05	0.000202548	chrII	8770975	8782020	+	let-19
2329	WBGene00002297	412.111	0.149567	0.121873	1.22724	0.219732	0.350952	chrII	10778389	10783962	-	ect-2
2330	WBGene00002299	908.16	-0.0687608	0.112277	-0.61242	0.54026	0.675914	chrII	9197518	9207210	+	let-23
2331	WBGene00002324	195.967	-0.257923	0.188071	-1.37141	0.170246	0.290561	chrI	14820381	14821651	+	let-49
2332	WBGene00002335	1609.83	0.177318	0.081355	2.17955	0.0292905	0.0734655	chrIV	11688227	11691088	-	let-60
2333	WBGene00002344	4109.09	-0.0419611	0.0929409	-0.451481	0.651643	0.764519	chrIV	11080989	11082253	-	let-70
2334	WBGene00002348	74139	0.237314	0.069265	3.42617	0.000612151	0.00280465	chrI	7258915	7267117	-	myo-1
2335	WBGene00002363	3240.97	-0.0991654	0.0824854	-1.20222	0.229279	0.362775	chrIV	11856629	11860460	+	let-92
2336	WBGene00002368	187.446	-0.158537	0.167993	-0.94371	0.345318	0.492076	chrIV	12567842	12570622	+	let-99
2337	WBGene00002393	832.465	-0.652325	0.317728	-2.05309	0.0400635	0.0943822	chrI	557375	561671	+	lpr-1
2338	WBGene00002497	1528.78	-0.0718359	0.104576	-0.686925	0.49213	0.632902	chrII	10033309	10039980	-	let-268
2339	WBGene00002583	10175.8	0.136814	0.0619929	2.20693	0.0273189	0.0695034	chrI	5245743	5263413	+	let-363
2340	WBGene00002601	70.2643	-0.0146964	0.226828	-0.0647908	0.948341	0.968695	chrI	6320289	6324018	-	let-381
2341	WBGene00002632	1713.77	-0.328964	0.0772435	-4.25879	2.05532e-05	0.00014319	chrV	7972924	7977774	-	let-413
2342	WBGene00002637	9858.68	-0.0591305	0.0673619	-0.877803	0.380051	0.527227	chrV	5826833	5832866	+	let-418
2343	WBGene00002694	1624.22	-0.400348	0.0766427	-5.22357	1.75508e-07	1.97535e-06	chrI	4738171	4744321	-	let-502
2344	WBGene00002696	667.523	0.0712249	0.114764	0.62062	0.534849	0.671286	chrI	4129469	4132292	-	let-504
2345	WBGene00002717	8454.14	-0.319755	0.0804046	-3.97682	6.98428e-05	0.000424848	chrI	5300901	5317392	-	let-526
2346	WBGene00002783	2991.23	-0.165204	0.11505	-1.43593	0.151022	0.266517	chrI	6574004	6585510	+	let-607
2347	WBGene00002804	2570.06	-0.0353755	0.0797332	-0.443674	0.657278	0.768631	chrI	5162599	5164884	-	let-630
2348	WBGene00002827	2114.1	-0.874921	0.263752	-3.31721	0.000909207	0.00395252	chrIV	11885530	11891081	+	let-653
2349	WBGene00002845	13162.3	-0.472804	0.0597064	-7.9188	2.3981e-15	9.0136e-14	chrIII	6946718	6958882	+	let-711
2350	WBGene00002850	10220.4	0.118956	0.0910412	1.30662	0.191342	0.31677	chrIII	6383552	6389401	+	let-716
2351	WBGene00002855	3797.8	-0.116137	0.0656639	-1.76865	0.0769519	0.15914	chrIII	6444693	6446943	-	let-721
2352	WBGene00002879	6466.02	0.0827968	0.0637791	1.29818	0.194225	0.320223	chrIII	7949975	7951915	-	let-754
2353	WBGene00002881	624.504	-1.23003	0.117884	-10.4342	1.73089e-25	1.62144e-23	chrIII	6407129	6410018	+	let-756
2354	WBGene00002889	7464.47	-0.0366634	0.082897	-0.442276	0.658289	0.769352	chrIII	6592567	6601171	-	let-765
2355	WBGene00002891	14663.6	0.0890495	0.0588842	1.51228	0.130462	0.238451	chrIII	6338508	6340228	-	let-767
2356	WBGene00002915	58934.5	0.175196	0.076041	2.30397	0.0212245	0.0567736	chrIII	2658083	2681112	+	let-805
2364	WBGene00002957	3166.55	0.0788101	0.0736443	1.07015	0.284554	0.426469	chrII	11022370	11027909	+	let-858
2365	WBGene00002974	712.212	-0.343543	0.121107	-2.8367	0.00455825	0.0156455	chrIV	13174157	13179457	-	lev-1
2366	WBGene00002975	185.524	-0.401034	0.158898	-2.52385	0.0116077	0.0343549	chrX	11560915	11563697	+	lev-8
2367	WBGene00002976	776.76	0.0430285	0.112774	0.381548	0.702797	0.80186	chrX	6281847	6291732	-	lev-9
2368	WBGene00002977	2695.27	-0.155931	0.0800625	-1.94762	0.0514603	0.115486	chrI	14390333	14400222	+	lev-10
2369	WBGene00002978	35037.6	0.466025	0.0772183	6.03516	1.58808e-09	2.61346e-08	chrI	14621173	14631254	-	lev-11
2370	WBGene00002979	1432.83	-0.197996	0.083353	-2.37539	0.0175303	0.0484701	chrI	5023889	5041149	+	lfe-2
2371	WBGene00002980	4975.46	0.0549657	0.257325	0.213604	0.830856	0.892674	chrII	6346960	6347719	-	lgg-1
2372	WBGene00002981	979.366	-0.722405	0.138505	-5.21575	1.8308e-07	2.05677e-06	chrIV	10934186	10935914	-	lgg-2
2373	WBGene00002982	126.165	-0.35092	0.18067	-1.94232	0.0520979	0.116512	chrIII	5697477	5698013	-	lgg-3
2374	WBGene00002983	135.1	-0.415499	0.276896	-1.50056	0.13347	0.242694	chrX	5525199	5538514	-	lgx-1
2375	WBGene00002985	752.203	-0.292857	0.100654	-2.90954	0.00361958	0.0128915	chrV	10814113	10816718	+	lig-1
2376	WBGene00002986	729.392	0.177053	0.0947881	1.86788	0.061779	0.13379	chrIII	7521004	7524836	+	lig-4
2377	WBGene00002987	61.0147	-0.535759	0.256045	-2.09244	0.0363993	0.0873243	chrX	3869753	3873295	-	lim-4
2378	WBGene00002988	59.9329	-0.125611	0.257517	-0.487777	0.625708	0.743934	chrX	1073908	1079451	+	lim-6
2379	WBGene00002989	251.1	-0.555	0.142297	-3.90028	9.60798e-05	0.00056127	chrI	5716574	5725772	+	lim-7
2380	WBGene00002990	998.425	-0.0459831	0.132241	-0.347723	0.728048	0.820537	chrIV	2275864	2300351	-	lin-1
2381	WBGene00002991	1802.69	-0.395331	0.0922827	-4.28391	1.83636e-05	0.000129717	chrX	12399517	12414037	-	lin-2
2382	WBGene00002992	448.039	1.11967	0.14642	7.64699	2.05735e-14	6.9084e-13	chrIV	11054308	11063613	+	lin-3
2383	WBGene00002994	2298.84	-0.0658231	0.0681821	-0.965401	0.334344	0.480713	chrII	7860574	7863563	+	lin-5
2384	WBGene00002996	597.338	0.20556	0.110936	1.85296	0.0638877	0.137476	chrII	14346877	14348792	-	lin-7
2385	WBGene00002997	308.977	-0.130406	0.140494	-0.928194	0.353307	0.499635	chrII	3056822	3060207	+	lin-8
2386	WBGene00002998	526.932	-0.0777231	0.109667	-0.708719	0.478499	0.62013	chrIII	8900237	8904160	-	lin-9
2387	WBGene00002999	2066.83	-0.506881	0.0822424	-6.16326	7.12644e-10	1.24098e-08	chrI	8109746	8119314	-	lin-10
2388	WBGene00003000	80.6811	-0.572742	0.23892	-2.39721	0.0165204	0.0462141	chrI	10248256	10255327	+	lin-11
2389	WBGene00003001	2351.6	2.13391	0.128118	16.6558	2.74497e-62	8.4987e-60	chrIII	9060096	9071760	-	lin-12
2390	WBGene00003002	6062.08	-0.214362	0.0679779	-3.15341	0.00161375	0.00646031	chrIII	7700338	7709491	-	lin-13
2391	WBGene00003003	1808.35	0.23648	0.0910163	2.59821	0.00937107	0.0286688	chrX	11465557	11484368	+	lin-14
2392	WBGene00003006	897.902	-0.438986	0.112623	-3.89782	9.70613e-05	0.000566279	chrI	2706883	2717549	+	lin-17
2393	WBGene00003007	613.578	-1.38135	0.114903	-12.0219	2.72705e-33	3.95357e-31	chrX	3958497	3961907	+	lin-18
2394	WBGene00003008	157.034	0.0137533	0.186228	0.0738517	0.941128	0.964144	chrIV	3019738	3022315	+	lin-22
2395	WBGene00003009	1337.04	-0.627792	0.10547	-5.95235	2.64327e-09	4.18773e-08	chrII	6371295	6374544	+	lin-23
2396	WBGene00003010	1163.17	-0.343911	0.111077	-3.09615	0.0019605	0.00763105	chrIV	12129504	12135096	+	lin-24
2397	WBGene00003011	1021.37	-0.333357	0.095912	-3.47565	0.000509617	0.00238881	chrV	12649858	12658718	+	lin-25
2398	WBGene00003012	1914.94	-0.441786	0.114748	-3.85006	0.000118088	0.000669285	chrII	7682198	7684760	+	lin-26
2399	WBGene00003014	558.067	-0.0867359	0.126617	-0.685025	0.493328	0.634041	chrI	8407802	8410804	-	lin-28
2400	WBGene00003015	258.877	-0.295325	0.134586	-2.19432	0.0282126	0.0713499	chrII	11917642	11935343	-	lin-29
2401	WBGene00003017	59.2725	0.281794	0.251893	1.1187	0.263267	0.402495	chrII	3982549	3986944	+	lin-31
2402	WBGene00003018	19.3442	0.233614	0.354595	0.65882	0.510011	0.648953	chrX	2229208	2230122	-	lin-32
2403	WBGene00003019	1367.77	0.066292	0.083889	0.790235	0.429391	0.576063	chrIV	5930645	5933326	+	lin-33
2404	WBGene00003020	1290.32	-0.10036	0.092559	-1.08428	0.278239	0.419393	chrI	5807709	5815637	+	lin-35
2405	WBGene00003021	847.462	0.022281	0.097326	0.228932	0.818922	0.884482	chrIII	8016648	8020873	-	lin-36
2407	WBGene00003022	476.218	0.190768	0.114233	1.67	0.09492	0.187004	chrIII	7070800	7072552	-	lin-37
2408	WBGene00003024	283.195	-0.262607	0.153328	-1.71271	0.0867662	0.174917	chrIII	7528641	7536632	-	lin-39
2409	WBGene00003025	4100.78	-0.0706666	0.0661072	-1.06897	0.285084	0.426924	chrV	3704988	3712796	+	lin-40
2410	WBGene00003026	6156.46	0.0973498	0.0697069	1.39656	0.162546	0.28099	chrI	9334812	9342496	-	lin-41
2411	WBGene00003029	166.254	-0.979343	0.193164	-5.07001	3.97788e-07	4.18813e-06	chrI	4126056	4129307	+	lin-44
2412	WBGene00003030	1055.46	-0.656371	0.0894773	-7.33561	2.20719e-13	6.57729e-12	chrIV	6742538	6748424	-	lin-45
2413	WBGene00003031	124.897	-0.0812943	0.18336	-0.443358	0.657507	0.768683	chrV	12968855	12970730	+	lin-46
2414	WBGene00003033	33.955	-0.101535	0.314391	-0.322958	0.746727	0.834931	chrIII	3745461	3747451	+	lin-48
2415	WBGene00003034	1588.34	-0.325706	0.0761649	-4.27632	1.90004e-05	0.000133698	chrIV	8620683	8626149	+	lin-49
2416	WBGene00003035	240.419	0.181175	0.139949	1.29458	0.195466	0.321877	chrIII	9824081	9824750	-	lin-52
2417	WBGene00003036	2641.76	-0.148926	0.0714057	-2.08563	0.0370119	0.0884249	chrI	9618207	9619760	-	lin-53
2418	WBGene00003037	326.164	-0.107547	0.140263	-0.766754	0.443228	0.588703	chrIV	13241051	13243401	+	lin-54
2419	WBGene00003038	145.615	-0.0463325	0.209347	-0.221319	0.824844	0.888767	chrII	10450607	10452004	+	lin-56
2420	WBGene00003040	3512.15	-0.359114	0.0707461	-5.0761	3.85251e-07	4.0655e-06	chrI	3713142	3721157	-	lin-59
2421	WBGene00003041	753.481	0.0731605	0.0984868	0.742845	0.457575	0.602286	chrI	7248828	7251422	-	lin-61
2422	WBGene00003043	494.089	-0.0619017	0.115362	-0.536587	0.591553	0.716801	chrIV	6842964	6845805	+	lip-1
2423	WBGene00003044	1029.89	-0.423562	0.1258	-3.36694	0.000760063	0.00338471	chrII	7672010	7682359	+	lir-1
2424	WBGene00003045	484.58	0.0358564	0.115073	0.311598	0.755346	0.84067	chrII	7667993	7671905	+	lir-2
2425	WBGene00003046	74.9905	-0.0269216	0.22184	-0.121356	0.903409	0.941391	chrII	11183075	11184807	-	lir-3
2426	WBGene00003047	1830.26	-0.0264453	0.0736124	-0.359251	0.719407	0.814113	chrIII	13371175	13376710	-	lis-1
2427	WBGene00003048	1874.73	-0.687764	0.120558	-5.70486	1.16441e-08	1.6387e-07	chrIII	13701993	13724401	+	lit-1
2428	WBGene00003052	11179.5	0.0185899	0.0711672	0.261214	0.793928	0.867853	chrI	8762986	8765633	+	lmn-1
2429	WBGene00003053	6229.21	-0.383673	0.0703572	-5.45322	4.9467e-08	6.17644e-07	chrX	6376459	6377684	-	lmp-1
2430	WBGene00003055	2106.12	-0.744481	0.0841462	-8.84747	8.95295e-19	4.97093e-17	chrIII	5474478	5478005	+	lon-1
2431	WBGene00003056	731.212	0.349027	0.105646	3.30374	0.000954037	0.00412385	chrX	4738964	4749083	-	lon-2
2432	WBGene00003057	262.967	-0.769835	0.399813	-1.92549	0.0541682	0.120259	chrV	12197437	12198645	-	lon-3
2433	WBGene00003058	5.28594	1.19006	0.397843	2.99128	0.00277811	0.0102732	chrII	10109279	10121825	-	lov-1
2434	WBGene00003059	328.309	0.51716	0.129969	3.9791	6.91771e-05	0.000421079	chrI	6253701	6254947	+	lpd-2
2435	WBGene00003060	10262.2	0.0155971	0.0699354	0.223021	0.823519	0.887768	chrI	3565012	3600729	-	lpd-3
2436	WBGene00003061	3824.01	0.249178	0.0667007	3.73576	0.000187146	0.0010034	chrI	4372255	4373018	-	lpd-5
2437	WBGene00003062	3361.96	0.261202	0.0973484	2.68317	0.00729276	0.0233141	chrI	3144410	3147793	-	lpd-6
2438	WBGene00003063	8097.19	0.417487	0.0812281	5.13969	2.75199e-07	2.98341e-06	chrIII	7573350	7575263	+	lpd-7
2439	WBGene00003064	968.729	0.224021	0.0912585	2.4548	0.0140963	0.0404933	chrIV	10387413	10388345	+	lpd-8
2440	WBGene00003065	2167.42	0.149151	0.0877096	1.7005	0.089036	0.178316	chrV	10579309	10580693	+	lpd-9
2441	WBGene00003066	1474.8	-0.0938129	0.0754174	-1.24392	0.21353	0.34348	chrIV	9092281	9093975	-	lpl-1
2442	WBGene00003068	3475.47	-0.579631	0.0761375	-7.61295	2.67913e-14	8.83388e-13	chrI	10879769	10894239	-	lrk-1
2443	WBGene00003071	26562.4	-0.358423	0.0909217	-3.94211	8.07688e-05	0.000481843	chrI	7614176	7634135	+	lrp-1
2444	WBGene00003072	15953.6	-0.165566	0.0846795	-1.95521	0.050558	0.113877	chrI	3935272	3953991	-	lrp-2
2445	WBGene00003073	15172.9	0.0495663	0.0608802	0.814161	0.415553	0.562664	chrIII	4181543	4186825	-	lars-1
2446	WBGene00003074	1733.59	0.146822	0.0810537	1.81142	0.0700766	0.147646	chrI	7457153	7460756	-	lars-2
2447	WBGene00003075	22.3764	0.645465	0.350535	1.84137	0.0655675	0.140216	chrV	12252623	12255450	+	lrx-1
2448	WBGene00003076	397.306	-0.567858	0.154939	-3.66503	0.000247306	0.00128412	chrII	11126932	11127530	+	lsm-1
2449	WBGene00003077	682.933	0.173587	0.0945254	1.8364	0.0662979	0.141413	chrIV	13387469	13389209	+	lsm-3
2450	WBGene00003078	696.051	0.152247	0.0989341	1.53887	0.123835	0.229143	chrII	7252230	7253222	-	lsm-4
2451	WBGene00003079	519.678	-0.0534162	0.111087	-0.480848	0.630624	0.748124	chrV	15569935	15570742	+	lsm-5
2452	WBGene00003080	459.261	-0.0268227	0.121223	-0.221268	0.824884	0.888767	chrI	1701361	1701808	+	lsm-6
2453	WBGene00003081	620.659	0.0877332	0.109673	0.799955	0.423737	0.570531	chrIV	10933502	10934200	+	lsm-7
2454	WBGene00003082	711.924	0.28528	0.113741	2.50815	0.0121364	0.0356595	chrIV	6326526	6329461	+	lsm-8
2455	WBGene00003083	407.238	0.377765	0.130629	2.89189	0.00382933	0.0135301	chrI	10588177	10590464	+	lst-1
2456	WBGene00003084	1175.42	-0.145826	0.0972674	-1.49923	0.133814	0.243143	chrX	4378004	4383366	-	lst-2
2457	WBGene00003085	10835.1	-0.0208237	0.0605893	-0.343686	0.731083	0.823001	chrIV	14071503	14076743	+	ccar-1
2458	WBGene00003086	1094.03	-0.308452	0.131355	-2.34824	0.0188623	0.0515266	chrIV	14061005	14069854	-	lst-4
2459	WBGene00003087	1071.94	-0.27716	0.0930115	-2.97984	0.00288397	0.0105999	chrX	2089659	2093253	+	lsy-2
2460	WBGene00003089	818.988	-0.70828	0.11143	-6.35627	2.06714e-10	3.90087e-09	chrII	8088427	8092754	-	ltd-1
2461	WBGene00003090	15687.1	0.24102	0.0953945	2.52656	0.0115185	0.0341351	chrV	10277827	10279127	+	lys-1
2462	WBGene00003091	3435.01	-0.448551	0.119191	-3.7633	0.000167687	0.000914098	chrV	10280310	10281474	-	lys-2
2463	WBGene00003092	30.3	1.299	0.319251	4.06889	4.7237e-05	0.000302022	chrV	10282204	10283544	-	lys-3
2464	WBGene00003093	3800.41	-0.576494	0.123266	-4.67682	2.91363e-06	2.4964e-05	chrIV	11621443	11623174	-	lys-4
2465	WBGene00003094	42.4246	-0.136086	0.287311	-0.473654	0.635746	0.752295	chrIV	11624255	11625582	-	lys-5
2466	WBGene00003095	46.9293	0.663207	0.331907	1.99817	0.045698	0.105094	chrIV	11626910	11627947	-	lys-6
2467	WBGene00003096	1683	0.0183247	0.316719	0.0578577	0.953862	0.971531	chrV	3481421	3482600	-	lys-7
2468	WBGene00003097	6314.7	0.0350261	0.110548	0.316841	0.751365	0.837718	chrII	5586165	5587651	+	lys-8
2469	WBGene00003098	1.13945	0.415769	0.270287	1.53825	0.123987	NA	chrI	12454853	12455826	-	lys-9
2470	WBGene00003099	10.8393	0.225644	0.388667	0.580558	0.561539	0.692521	chrIV	8332826	8333559	+	lys-10
2471	WBGene00003100	30.5274	1.18401	0.322143	3.67543	0.000237446	0.00124033	chrII	9732137	9738035	+	mab-3
2475	WBGene00003102	329.654	-0.202197	0.129707	-1.55887	0.119026	0.222658	chrIII	7776835	7783454	-	mab-5
2476	WBGene00003104	19.6971	-0.300766	0.354819	-0.84766	0.396627	0.544138	chrX	892228	898117	-	mab-7
2477	WBGene00003106	172.006	-0.737896	0.181934	-4.05585	4.99528e-05	0.000316616	chrII	516014	521605	+	mab-9
2479	WBGene00003107	124.535	0.0794239	0.27634	0.287413	0.773796	0.854292	chrII	10528084	10533880	+	mab-10
2480	WBGene00003111	822.098	-0.200764	0.091765	-2.18781	0.0286834	0.0722479	chrI	1644588	1651394	-	mab-20
2481	WBGene00003112	985.572	-0.707602	0.112372	-6.29698	3.03491e-10	5.57174e-09	chrIII	4600737	4603052	+	mab-21
2482	WBGene00003114	11.2922	-0.541744	0.389067	-1.39242	0.163796	0.282717	chrV	10633058	10635411	+	mab-23
2483	WBGene00003119	2538.18	0.148802	0.092352	1.61125	0.107125	0.205099	chrII	13311459	13320911	-	mac-1
2484	WBGene00003123	2725.61	0.151441	0.0701371	2.15921	0.030834	0.0765486	chrI	11912005	11912677	-	mag-1
2485	WBGene00003124	288.211	-0.387636	0.174786	-2.21777	0.0265703	0.0679965	chrX	3114668	3116538	-	mai-1
2486	WBGene00003129	1608.64	0.206071	0.0952686	2.16306	0.0305369	0.0760074	chrIV	3683537	3686865	-	map-1
2495	WBGene00003130	4485.33	0.170015	0.0798815	2.12833	0.0333093	0.0813451	chrIV	16847829	16854943	-	map-2
2496	WBGene00003132	1872.14	-0.410875	0.0940472	-4.36881	1.24926e-05	9.18685e-05	chrI	5123916	5127199	-	mat-1
2497	WBGene00003133	1938.01	-0.484487	0.0762622	-6.3529	2.11291e-10	3.97903e-09	chrII	11112719	11120788	+	mat-2
2498	WBGene00003134	822.016	-0.253201	0.0891097	-2.84145	0.00449086	0.0154345	chrIII	475454	482322	+	mat-3
2499	WBGene00003136	441.911	-0.43205	0.115468	-3.74173	0.00018276	0.000984509	chrI	8125801	8130091	+	mau-2
2500	WBGene00003142	342.34	0.0435249	0.122772	0.354518	0.722951	0.816571	chrIV	13378016	13380407	+	mau-8
2501	WBGene00003143	1420.06	-0.303494	0.105852	-2.86716	0.00414168	0.0144437	chrV	13098910	13110337	-	max-1
2505	WBGene00003144	1695.18	0.0124124	0.104555	0.118716	0.9055	0.942574	chrII	13014331	13025838	-	max-2
2506	WBGene00003148	3469.74	0.287511	0.106131	2.70901	0.0067485	0.0218418	chrIV	11479358	11480369	-	mbf-1
2507	WBGene00003149	1314.89	-0.556196	0.0814528	-6.82845	8.58343e-12	2.04158e-10	chrX	14819909	14824540	-	mbk-1
2508	WBGene00003150	3607.55	-0.327147	0.0881778	-3.71008	0.000207195	0.00109865	chrIV	13009116	13035955	+	mbk-2
2509	WBGene00003151	10804.5	0.260851	0.075095	3.47361	0.0005135	0.00240392	chrIV	9625910	9634948	-	mca-1
2510	WBGene00003153	28025.7	0.0920566	0.0727987	1.26454	0.206037	0.334342	chrIV	3103157	3133147	-	mca-3
2511	WBGene00003154	1078.01	-0.358246	0.109343	-3.27636	0.00105154	0.00447173	chrII	12001510	12006625	-	mcm-2
2512	WBGene00003155	1097.26	-0.458595	0.109578	-4.1851	2.85035e-05	0.000192344	chrV	15056719	15059599	-	mcm-3
2513	WBGene00003156	1853.6	-0.37074	0.124837	-2.9698	0.00297992	0.0109087	chrI	2318291	2321847	-	mcm-4
2514	WBGene00003157	1315.4	-0.582941	0.11145	-5.23053	1.69021e-07	1.91414e-06	chrIII	4288264	4291283	-	mcm-5
2515	WBGene00003158	1822.01	-0.431455	0.112683	-3.82894	0.000128699	0.000721282	chrIII	9794367	9798643	+	mcm-6
2516	WBGene00003159	1271.34	-0.53295	0.0969559	-5.49683	3.86684e-08	4.93955e-07	chrV	4347166	4349768	+	mcm-7
[truncated: 18,214 more rows]
