# Supplementary material for: Diversification of the Caenorhabditis heat shock response by Helitron transposable elements
Source: eLife. 2019 Dec 11;8:e51139. doi: 10.7554/eLife.51139 (PMC6927752; doi:10.7554/eLife.51139)
Supplement: Supplementary file 3. — List of HSR genes containing Helitron independent HSEs (Hin-HSEs) bound by HSF-1. [file elife-51139-supp3.xlsx]

## Sheet: Supplemental.Table.3_Hac-HSE.HS
WB.ID	gene.name	chrom	start	end	strand	upstream.HSEs	avg.mRNA.NHS	avg.mRNA.HS	avg.PolII.NHS	avg.PolII.HS	avg.H3K27me3	avg.H3K9me3	avg.H3K4me3	avg.H3K36me3	HSF1.summit.Tajimas.D	RNAi.Phenotype.Observed	Allele.Phenotype.Observed
WBGene00019920	acs-15	chrII	933018	936989	+	26	1.51	64.37	6.77	12.27	7.59	7.8	20.38	6.18	-2.2	NaN	NaN
WBGene00013043	arrd-16	chrIII	12484732	12488339	+	26	47.82	187.68	10.77	8	6.35	13.53	19.11	11.67	-1.31	NaN	NaN
WBGene00016520	C39B5.2	chrIII	2233888	2236987	+	8	47	106.69	3.68	5.96	4.09	8.75	27.01	8.63	-1.89	complex phenotype early emb, embryonic lethal	NaN
WBGene00016557	ceh-84	chrII	1999743	2000820	-	13	0	19.86	3.61	9.41	5.74	17.02	22.21	8.82	-1.65	NaN	NaN
WBGene00000487	che-6	chrIV	2104056	2111408	-	18	11.97	34.92	5.42	7.73	5.65	8.36	25.75	6.46	-1.65	NaN	chloride chemotaxis defective, ciliated neuron morphology variant, dauer recovery variant, inner labial morphology variant, sodium chemotaxis defective, sodium chloride chemotaxis defective
WBGene00021041	clp-10	chrIII	35454	39462	-	10	8.22	53.43	5.28	8.29	6.63	10.26	23.83	5.78	-0.56	hypoosmotic shock hypersensitive, lethal	NaN
WBGene00000546	clp-6	chrIV	1431272	1435039	-	6	6.21	32.02	5.61	6.43	8.05	20.47	16.78	12.02	-1.06	body wall muscle sarcomere morphology variant, cell death variant, mitochondria morphology variant	NaN
WBGene00000735	col-162	chrV	13441967	13443402	+	64	80.94	200.82	4.44	11.46	10.64	5.64	33.4	12.77	-2.29	NaN	NaN
WBGene00000629	col-52	chrI	4571214	4572787	-	86	8.37	45.64	5.96	6.7	8.45	8.9	34.72	11.37	-2.18	NaN	NaN
WBGene00000663	col-88	chrIII	41061	42021	+	10	8.98	88.69	2.57	10.58	15.9	19.68	54.93	18.37	-0.56	organism hypertonic lethality increased	NaN
WBGene00000672	col-97	chrIII	12992405	12993707	-	8	110.85	851.39	20.76	51.87	10.19	7.73	73.4	19.57	-2.22	dumpy, locomotion variant, organism morphology variant	NaN
WBGene00017524	F16G10.9	chrII	2384186	2385595	-	14	0.33	20.91	4.52	8.25	8.96	16.48	16.47	10.16	-1.38	NaN	NaN
WBGene00009046	F22B8.3	chrV	16090985	16092117	+	9	0.33	83.7	3.03	4.12	4.82	6.15	25.9	6.18	-1.68	NaN	NaN
WBGene00018019	F33H12.1	chrII	2600553	2601779	+	13	0.85	11.77	2.15	7.55	13.49	23.06	32.48	12.27	0.01	dauer lifespan extended	NaN
WBGene00018020	F33H12.6	chrII	2594052	2598903	-	13	13.55	809.02	3.91	15.74	10.44	33.11	30.27	12.08	0.01	dauer lifespan extended	NaN
WBGene00018385	F43C11.8	chrII	2332520	2334338	+	57	17.08	256.17	6.81	22.49	8.73	7.5	26.74	8.02	0.67	NaN	NaN
WBGene00018397	F43E2.11	chrII	7369251	7370309	-	3	10.94	34.64	8.37	12.94	7.5	6.64	34.08	7.67	-1.2	NaN	NaN
WBGene00019136	F59H6.5	chrII	2003377	2008250	+	13	22.09	2124.2	3.81	23.09	10.81	33.96	33.59	16.13	-1.65	dauer lifespan extended	NaN
WBGene00010534	fbxa-102	chrV	17492077	17493832	-	9	0	8.52	2.76	4.3	5.86	28.94	20.73	9.1	-0.47	NaN	NaN
WBGene00044655	fbxa-194	chrV	19777247	19778708	-	14	6.9	22.16	8.99	6.72	8.87	29.42	22.23	10.84	-1.72	NaN	NaN
WBGene00016527	fbxa-47	chrIII	2229992	2232460	-	8	4.86	24.26	5.08	8.56	6.13	10.42	13.73	7.21	-1.89	NaN	NaN
WBGene00021862	fbxa-48	chrIII	2266980	2272175	-	11	2.1	287.44	5.32	5.63	5.18	7.16	21.83	6.44	-1.68	NaN	NaN
WBGene00010099	fbxb-117	chrV	19282614	19284594	+	66	0.56	54.11	4.71	6.14	6.06	15.21	31	4.27	-1.76	NaN	NaN
WBGene00010104	fbxb-60	chrV	19297810	19298749	+	23	0.66	18.47	1.58	3.24	8.21	16.89	26.93	8.96	-0.47	NaN	NaN
WBGene00001913	his-39	chrV	8536513	8536716	+	8	13.86	71.02	38.38	63.35	6.51	6.09	52.35	8.91	-2.2	avoids bacterial lawn, dauer lifespan extended, embryonic lethal, larval arrest, locomotion variant, lysosome-related organelle morphology variant, no induction of antimicrobial peptide expression after infection, protein aggregation variant, RAB-11 recycling endosome localization variant, RAB-11 recycling endosome morphology variant, sister chromatid segregation defective early emb, slow growth,…	NaN
WBGene00012500	hpo-2	chrI	13066924	13069038	+	5	11.06	121.85	4.17	11.49	8.88	21.78	37.28	12.12	-1.01	Bacillus thuringiensis toxin hypersensitive, pore forming toxin hypersensitive	NaN
WBGene00015574	irg-1	chrV	3523587	3524575	+	16	72.19	247.25	4.78	5.02	7.11	6.96	26.69	10.2	-1.94	NaN	NaN
WBGene00019718	M01H9.2	chrIV	4460179	4462061	-	4	15.54	76.38	22.4	15.24	9.66	7.24	37.41	11.69	-1.44	NaN	NaN
WBGene00019721	M01H9.5	chrIV	4465484	4468509	+	3	4.39	43.81	24.73	46.57	6.18	6.64	68.73	7.93	-1.44	NaN	NaN
WBGene00019783	M70.1	chrIV	2245874	2252370	+	30	0	13.57	6.26	7.41	7.16	12.22	40.5	8.65	-0.94	fat content increased	NaN
WBGene00013483	nhr-241	chrV	18699451	18700992	+	8	2.98	466.7	2.26	20.4	9.09	15.43	51.29	8.62	-2.26	NaN	NaN
WBGene00014193	nhr-247	chrV	15323853	15325351	+	12	3.72	278.09	3.09	28.29	6.53	6.32	25.34	5.32	-0.35	embryonic lethal, larval lethal, organism morphology variant	NaN
WBGene00021479	oac-55	chrV	3761139	3766306	+	3	6.1	20.42	4.22	5.22	8.5	7.29	38.61	8.72	-2.27	NaN	NaN
WBGene00018477	otpl-4	chrV	8537331	8539614	+	8	3.9	108.46	5.09	9.26	6.08	5.5	26.39	5.16	-2.2	NaN	NaN
WBGene00019817	R02C2.6	chrV	238963	240362	-	5	0	11.73	3.9	6.19	10.83	7.97	37.18	8.14	-2.38	NaN	NaN
WBGene00044284	spp-21	chrX	11490130	11490494	+	5	0	22.94	11.15	11.98	5.62	5.46	32.49	7.67	-2.26	organism osmotic stress response variant	NaN
WBGene00022405	srsx-6	chrV	7927084	7928451	+	33	15.33	89.75	15.43	39.09	4.69	5.21	24.04	4.19	-2.05	NaN	NaN
WBGene00022406	srsx-7	chrV	7925783	7926756	+	121	12.02	150.41	3.52	18.67	4.84	6.17	22.48	5.97	-2.04	NaN	NaN
WBGene00016049	srt-28	chrV	2712034	2713632	-	6	15.53	50.5	7.5	14.66	13.09	18.03	32.91	13.35	-2.29	NaN	NaN
WBGene00005725	srv-14	chrIV	15891707	15894229	-	44	13.73	103.99	12.36	29.78	6.08	5.61	18.77	4.45	-1.9	NaN	NaN
WBGene00005757	srw-10	chrIII	12755348	12756613	+	21	5.69	39.9	4.16	7.33	7.22	8.5	23.54	9.41	-2.14	NaN	NaN
WBGene00006204	str-159	chrIV	4909339	4910962	+	4	0	9.65	3.5	3.88	5.63	5.24	20.5	4.34	-1.21	NaN	NaN
WBGene00006096	str-30	chrV	3725072	3726775	+	5	2.35	19.05	8.16	10.4	8.46	6.34	25.23	7.39	-2.64	reduced brood size	NaN
WBGene00006153	str-96	chrV	15292490	15293965	-	30	2.94	69.3	4.01	9.83	7.45	6.93	32.15	5.43	1.27	NaN	NaN
WBGene00020795	T25D1.3	chrX	16505248	16507411	+	67	90.09	202.04	4.25	7.33	5.68	7.63	47.75	7.66	-0.98	NaN	NaN
WBGene00021194	Y16E11A.2	chrII	1979245	1984118	-	13	3.42	571.42	2.96	17.48	10.49	31.21	36.84	13.22	-1.65	dauer lifespan extended	NaN
WBGene00012654	Y39A1A.16	chrIII	10679474	10682212	+	14	3.05	46.21	5.55	6.87	3.83	5.11	22.54	6.96	-0.85	NaN	NaN
WBGene00012942	Y47D3B.6	chrIII	11427135	11428414	+	30	44.39	954.22	13.4	41.73	11.98	8.14	56.25	23.25	-1.56	NaN	NaN
WBGene00013172	Y53F4B.26	chrII	15140476	15140981	-	13	13.81	1661.64	7.17	56.54	8.71	23.18	32.84	11.16	-1.24	NaN	NaN
WBGene00013154	Y53F4B.7	chrII	14992898	14993403	+	13	14.01	1436.76	13.94	89.96	16.83	26.27	39.15	16.22	-1.38	NaN	NaN
WBGene00021799	Y53G8AL.1	chrIII	3233102	3241263	+	25	66.27	230.67	7.96	9.57	5.9	12.01	28.76	10.43	-1.11	NaN	NaN
WBGene00021821	Y54B9A.1	chrV	9439160	9439549	-	11	359.92	830.29	14.21	34.18	16.38	24	54.5	14.15	-2.14	NaN	NaN
WBGene00045501	Y6G8.8	chrV	17620566	17622750	+	97	0	20.44	5.49	9.45	7.18	26.91	29.37	6.92	-1.16	NaN	NaN
WBGene00022581	ZC262.4	chrIII	8333663	8334233	-	8	1.23	14.87	18.77	14.13	1.53	6.75	32.47	96.17	-1.78	NaN	NaN
WBGene00043948	ZC262.7	chrIII	8343771	8344336	-	26	71.99	310.25	19.46	41.83	13.58	14.61	81.34	89.6	-0.82	axon branching variant, axon fasciculation variant, cord commissures fail to reach target, dendrite development variant, dumpy, early endosome localization variant, embryonic lethal, exploded through vulva, late endosome localization variant, locomotion variant, meiotic spindle positioning defective, protein degradation variant, protein subcellular localization variant, RAB-11 recycling endosome …	NaN
WBGene00014196	ZK1053.1	chrI	13227995	13229751	-	72	6.77	170.71	4.63	19.02	5.91	7.34	18.37	6.15	-2.4	NaN	NaN
WBGene00014197	ZK1053.2	chrI	13232121	13234686	+	72	18.34	906.12	3.82	31.78	9.46	11.11	28.36	12.7	-2.4	NaN	NaN
WBGene00022866	ZK1240.1	chrII	2329355	2331792	+	80	49.64	1424.16	5.65	32.29	7.54	7.33	33.57	4.91	0.19	larval lethal, locomotion variant, sick, slow growth	NaN
WBGene00022872	ZK1240.8	chrII	2326995	2329053	-	80	19.47	1438.56	5.11	36.07	5.39	6.97	31.33	5.3	0.67	NaN	NaN
WBGene00022692	ZK250.9	chrII	1963063	1967936	-	13	3.42	571.42	3.35	16.21	10.1	32.49	32.93	12.71	NA	dauer lifespan extended	NaN
