# Supplementary material for: Diversification of the Caenorhabditis heat shock response by Helitron transposable elements
Source: eLife. 2019 Dec 11;8:e51139. doi: 10.7554/eLife.51139 (PMC6927752; doi:10.7554/eLife.51139)
Supplement: Supplementary file 4. — List of HSR genes containing Helitron acquired HSEs (Hac-HSEs) bound by HSF-1. [file elife-51139-supp4.xlsx]

## Sheet: Supplemental.Table.4_Hin-HSE.HS
WB.ID	gene.name	chrom	start	end	strand	upstream.HSEs	avg.mRNA.NHS	avg.mRNA.HS	avg.PolII.NHS	avg.PolII.HS	avg.H3K27me3	avg.H3K9me3	avg.H3K4me3	avg.H3K36me3	HSF1.summit.Tajimas.D	RNAi.Phenotype.Observed	Allele.Phenotype.Observed
WBGene00000082	adt-1	chrX	12678832	12689279	+	1	117.69	261.87	10.58	16.6	4.48	5.26	42.84	11.16	-0.26	NaN	NaN
WBGene00000097	aip-1	chrV	14012333	14013644	+	3	526.46	5096.93	16.98	151.68	1.63	5.03	384.52	56.4	-2	arsenic hypersensitive, arsenite hypersensitive, chemical hypersensitive, hypersensitive to protein aggregation induced paralysis, organism toxic chemical response variant, paralyzed, peptide uptake by intestinal cell decreased, protein aggregation variant, protein ubiquitination variant, shortened life span, transgene expression increased	NaN
WBGene00013569	bath-36	chrV	15187989	15189588	+	1	58.23	163.86	14.37	25.15	2.48	5.3	187.05	18.77	-2.5	embryonic lethal	NaN
WBGene00015516	C06A8.6	chrII	7772499	7773914	+	2	11.79	112.26	67.12	45.66	3.95	5.49	35.49	11.83	-1.05	NaN	NaN
WBGene00007553	C13G3.1	chrV	11011589	11012465	-	1	79.49	1406.69	48.7	156.14	6.07	5.56	42.64	6.27	-2.11	NaN	NaN
WBGene00007632	C16C10.13	chrIII	4176678	4177578	+	1	9.82	35.98	33.17	6.42	1.88	6.42	27.37	85.72	-2.25	NaN	NaN
WBGene00007682	C18D11.6	chrIII	11810556	11811046	+	1	10.33	222.45	8.46	16.43	6.58	6.95	33.16	10.24	-1.54	NaN	NaN
WBGene00016041	C24A11.2	chrI	5380160	5383029	+	4	30.95	214.59	12.88	68.54	2.16	5.37	27.3	5.16	-2.12	NaN	NaN
WBGene00007777	C27D8.1	chrIV	12717831	12719391	+	3	12.65	50.87	3.8	7.47	9.05	7.14	32.77	14.35	-1.75	embryonic lethal, reduced brood size	NaN
WBGene00016637	C44B12.3	chrIV	1104773	1105086	+	1	4.38	158.13	7.43	48.52	5.24	10.42	40.64	7.28	-1.78	NaN	NaN
WBGene00044180	C47E8.11	chrV	14688616	14688959	+	1	13.18	584.24	79.09	431.14	1.64	5.29	180.3	38.6	-1.69	avoids bacterial lawn, dauer constitutive, embryonic lethal, fewer germ cells, larval arrest, no oocytes, nuclear appearance variant, organism pathogen response variant, paralyzed, pathogen susceptibility increased, slow growth, sperm morphology variant, sterile, transgene expression increased	NaN
WBGene00000391	cdd-1	chrX	8208748	8211149	-	2	945.85	2552.12	11.48	29.91	3.55	5.04	25.34	5.45	-0.84	egg shape variable	NaN
WBGene00000549	cls-2	chrIII	9055052	9058882	+	3	3276.61	9273.47	15.61	58.62	1.62	5.27	291.85	164.79	-1.9	antibody subcellular localization variant, chromosome segregation variant, chromosome segregation variant karyomeres early emb, embryonic lethal, exploded through vulva, locomotion variant, meiotic chromosome segregation variant, meiotic progression during oogenesis variant, meiotic spindle defective, mitosis variant, mitotic chromosome segregation variant, mitotic spindle defective early emb, no…	NaN
WBGene00020725	cnp-3	chrX	17135975	17138110	-	1	540.14	2936.84	7.32	83.82	4.91	7.11	33.89	21.71	-1.6	NaN	egg laying levamisole resistant, egg laying serotonin resistant
WBGene00000672	col-97	chrIII	12992405	12993707	-	8	110.85	851.39	20.76	51.87	10.19	7.73	73.4	19.57	-2.11	dumpy, locomotion variant, organism morphology variant	NaN
WBGene00000780	cpn-4	chrI	10924240	10925753	-	2	1285.2	2826.39	8.1	28.83	5.94	6.27	34.8	9.65	-1.79	NaN	NaN
WBGene00017146	EGAP1.1	chrIII	5935749	5937220	-	1	4.44	19.77	8.12	14.59	2.29	6.27	27.28	6.47	-1.58	NaN	NaN
WBGene00001311	end-3	chrV	14014701	14015850	+	2	1.54	42.49	2.95	8.95	4.45	5.34	26.1	7.4	-2.1	E lineage variant, intestinal development variant, transgene expression reduced, transgene expression variant	embryonic lethal, gastrulation variant, gene expression variant
WBGene00008496	F01D5.6	chrII	14006511	14008514	+	1	73.01	565.9	16.52	40.11	7.71	8.58	54.93	18.61	-1.54	NaN	NaN
WBGene00017168	F01F1.14	chrIII	5882319	5882923	-	1	4.39	24.86	27.73	17.06	2.62	5.42	32.43	28.39	-1.89	NaN	NaN
WBGene00008944	F19B2.5	chrV	20162649	20164561	-	3	4724.87	33587.8	19.79	119.95	5.79	10.24	36.07	5.87	-1.01	NaN	NaN
WBGene00009115	F25F2.1	chrIII	4508855	4512162	+	3	3.52	28.87	4.85	8.29	4.99	6.18	69.06	10.73	-1.81	NaN	NaN
WBGene00017838	F26G1.2	chrII	4763081	4764174	+	1	72.74	392.99	20.12	52.36	4.31	6.21	37.64	8.51	-1.55	NaN	NaN
WBGene00018268	F41C3.2	chrII	4749968	4751822	+	1	1589.79	6965.35	17.03	45.42	9.77	8.23	31.45	9.83	-1.33	cell development variant	NaN
WBGene00009691	F44E5.4	chrII	11757106	11759323	-	10	11427.6	1.02338e+06	22.71	1145.93	5.1	6.42	74.8	69.55	-0.8	cadmium hypersensitive, slow growth	NaN
WBGene00009692	F44E5.5	chrII	11759640	11761853	+	10	32659.3	2.34324e+06	22.88	1147.76	5.99	5.69	80.9	66.93	-0.8	cadmium hypersensitive, slow growth	NaN
WBGene00009811	F47B8.10	chrV	14343068	14346964	+	2	16.56	120.81	5.59	13.95	6.9	5.76	29.48	7.85	-1.84	slow growth	NaN
WBGene00010177	F57A8.1	chrV	10037340	10048726	+	2	2242.47	13366.5	23.1	178.88	1.65	4.99	45.5	9.42	-2.3	NaN	NaN
WBGene00008144	gasr-8	chrV	14689154	14691861	+	1	20.46	478.7	20.27	31.61	2.52	5.68	82.11	9.5	-1.69	embryonic lethal, fewer germ cells, no oocytes, nuclear appearance variant, sperm morphology variant, sterile	NaN
WBGene00006448	glod-4	chrIII	4153599	4154650	+	1	464.09	1024.72	12.69	55.78	2.39	7.14	22.37	93.02	-2.14	protein modification variant, reactive oxygen species homeostasis variant, shortened life span	NaN
WBGene00001749	gst-1	chrIII	9059314	9060181	+	1	5374.04	11752.2	31.97	186.26	1.77	5.34	84.4	112.39	-1.86	organism electrophilic stress hypersensitive, pathogen susceptibility increased	NaN
WBGene00001784	gst-36	chrX	9861646	9862960	-	1	2020.12	5910.33	10.73	55.1	5.8	6.03	49.65	7.82	-1.62	NaN	NaN
WBGene00010434	H40L08.3	chrX	15069743	15076480	-	1	73.47	206.83	27.26	65.17	5.38	6.23	63.88	6.01	-1.75	protein aggregation variant	NaN
WBGene00016250	hsp-110	chrIII	8443917	8446920	-	2	19341.7	149281	23.34	429.65	2.06	5.74	562.95	157.72	-1.64	developmental delay postembryonic, embryonic lethal, exploded through vulva, extended life span, larval arrest, larval lethal, life span variant, locomotion variant, maternal sterile, no induction of antimicrobial peptide expression after infection, organism morphology variant, pattern of transgene expression variant, protein aggregation variant, protruding vulva, receptor mediated endocytosis de…	NaN
WBGene00002015	hsp-16.1	chrV	9087293	9087782	-	4	4261.87	323063	22.1	1063.61	1.23	6.61	72.12	6.6	-1.96	cadmium hypersensitive, dauer lifespan extended, larval arrest, life span variant, organism development variant, organism pathogen response variant, pathogen susceptibility increased, protein aggregation variant, slow growth, transgene subcellular localization variant	NaN
WBGene00002017	hsp-16.11	chrV	9090077	9090604	+	4	361.55	30062.3	20.18	1055.11	1.95	4.63	72.69	5.71	-1.96	cadmium hypersensitive, dauer lifespan extended, larval arrest, life span variant, organism development variant, organism pathogen response variant, pathogen susceptibility increased, protein aggregation variant, slow growth, transgene subcellular localization variant	NaN
WBGene00002019	hsp-16.48	chrV	9088131	9088617	+	2	1850.92	118618	23.93	1139.67	1.17	4.82	66.62	6.63	-1.97	larval arrest, life span variant	NaN
WBGene00002020	hsp-16.49	chrV	9089280	9089766	-	2	1850.92	118621	17.63	1119.71	1.97	5.08	72.65	4.6	-1.96	larval arrest, life span variant	NaN
WBGene00002026	hsp-70	chrI	9320325	9322534	-	2	928.55	97381.7	8.39	380.03	6.35	6.46	33.38	11.58	-2.15	arsenic hypersensitive, life span variant, organism osmotic stress response variant, protein aggregation variant, transgene subcellular localization variant	organism hypersensitive desiccation
WBGene00002214	klc-1	chrIV	11083735	11086050	+	1	340.3	871.43	13.2	40.88	2.65	6.17	61.1	42.29	-2.14	embryonic lethal, meiotic spindle positioning defective, polar body number defective early emb, protein expression reduced, reduced brood size, spindle position orientation defective early emb	NaN
WBGene00017393	nep-5	chrII	5488151	5490606	+	1	1.23	12.23	4.98	4.99	7.48	5.62	31.57	8.27	-1.79	NaN	NaN
WBGene00003589	nex-2	chrIII	10325613	10330422	-	1	2523.41	5301.72	14.12	44.66	3.75	6.48	18.89	27.45	-1.44	embryonic lethal, engulfment variant, germ cell morphology variant, reduced brood size	centriole biogenesis variant, embryonic lethal
WBGene00011557	ostf-4	chrIII	10299164	10299949	-	1	2.13	64.91	47.6	57.49	6.62	5.01	36.1	10.87	-1.47	NaN	NaN
WBGene00004156	pqn-74	chrIV	13329508	13331406	-	1	110.69	451.92	19.04	91.23	11.1	7.92	46.19	11.13	-1.99	dauer constitutive	NaN
WBGene00011077	R07B1.5	chrX	9864069	9866531	+	1	4.03	47.28	6.88	8.53	4.57	5.22	32.38	5.35	-1.62	NaN	NaN
WBGene00011300	R107.5	chrIII	9051592	9053793	-	3	3781.67	47544.8	20	380.06	1.55	4.52	245.35	39.23	-1.9	NaN	lethal, sterile
WBGene00011231	R11A5.3	chrI	7862736	7863553	-	1	112.83	11707.2	16.65	348.12	2.31	4.85	26.67	6.4	-1.78	NaN	NaN
WBGene00020036	R12E2.11	chrI	4172433	4173739	-	1	1870.54	8066.43	123.89	408.76	2.06	5.72	81.25	85.33	-1.94	embryonic lethal, intestinal vacuole	NaN
WBGene00007303	rnh-1.3	chrI	9710093	9710767	-	1	31.24	75.93	11.63	10.86	4.42	6.33	33.72	16.02	-1.95	NaN	NaN
WBGene00005967	srx-76	chrV	11891812	11893451	+	1	3.18	30.48	4.76	49.85	3.04	3.61	20.35	3.46	-1.98	NaN	NaN
WBGene00020861	T27E4.1	chrV	9092345	9094345	+	2	238.39	8112.36	14.59	220.99	2.24	5.13	39.55	8.57	-1.96	NaN	NaN
WBGene00008405	ttll-12	chrII	9338890	9341394	+	2	3099.13	42782.7	7.89	205.52	2.02	4.83	27.07	118.71	-1.77	body wall muscle myosin organization defective, body wall muscle sarcomere morphology variant, mitochondria alignment variant, protein expression reduced, shortened life span	lethal, sterile
WBGene00012219	W03C9.1	chrII	11960989	11962128	-	1	4.77	47.71	15.62	14.3	1.96	9.08	48.8	9.59	-0.94	NaN	NaN
WBGene00012281	W05E10.2	chrV	11687426	11689174	+	4	27.02	71.34	5.16	11.71	4.26	4.86	23.06	3.23	-2.12	fat content reduced	NaN
WBGene00012621	Y38H6C.8	chrV	20514637	20515706	+	1	40.16	1430.47	9.21	64.73	9.51	24.23	29.99	15.84	-2.35	NaN	NaN
WBGene00021600	Y46H3A.4	chrV	1809560	1811135	-	1	51.26	1080.35	5.57	397.9	10.38	9.16	32.13	10.25	-2.08	NaN	NaN
WBGene00013356	Y59A8B.24	chrV	17951949	17952149	+	1	4.11	81.93	24.59	75.99	1.38	4.47	169.61	31.2	-1.93	NaN	NaN
WBGene00022699	ZK353.3	chrIII	8395985	8396727	+	1	0.33	8.34	6.02	6.11	6.36	5.43	24.9	7.52	-1.68	embryonic lethal	NaN
WBGene00219456	ZK822.10	chrIV	11916879	11917365	+	1	20.59	63.07	10.98	29.66	3.26	5.76	49.91	4.7	-1.61	NaN	NaN
WBGene00014155	ZK930.5	chrII	11882614	11883685	+	1	4.43	26.41	3.27	6.85	4.71	5.95	29.06	10.11	-0.79	NaN	NaN
