# Supplementary material for: Diversification of the Caenorhabditis heat shock response by Helitron transposable elements
Source: eLife. 2019 Dec 11;8:e51139. doi: 10.7554/eLife.51139 (PMC6927752; doi:10.7554/eLife.51139)
Supplement: Supplementary file 5. — Analysis of HSEs located within annotated Helitrons for species available at the UCSC Genome Browser. [file elife-51139-supp5.xlsx]

## Sheet: Sheet1
UCSC genome browser
Genome statistics						Significance of overlap				1kb windows with pileups of HSEs
Organism name	Genome assembly	Total # HSEs	Total # helitrons	Percent HSEs inside helitrons		# HSEs overlapping helitrons	Percent genome in helitrons	p-value from binomial distribution		>10	>25	>50	>75	>100
Ailuropoda melanoleuca (Panda)	ailMel1	48261	1987	0.000124324		6	0.000176486	0.745694		0	0	0	0	0
Alligator mississippiensis (American alligator)	allMis1	16881	29409	0		0	0.00270701	1		0	0	0	0	0
Anolis carolinensis (Lizard)	anoCar2	18121	85083	0.00292478		53	0.00800289	1		0	0	0	0	0
Anopheles gambiae	anoGam3	3299	1671	0		0	0.00120914	0.981526		0	0	0	0	0
Balaenoptera acutorostrata scammoni (Minke whale)	balAcu1	43122	2117	0.00013914		6	0.000179729	0.655205		2	0	0	0	0
Bison bison bison (Bison)	bisBis1	49042	1507	0.000101953		5	9.496e-05	0.3241		0	0	0	0	0
Bos taurus (Cow)	bosTau8	47995	1492	0.000125013		6	0.000104649	0.241124		0	0	0	0	0
Caenorhabditis brenneri	caePb1	24345	3437	0.312836		7616	0.00314651	<1E-20		292	95	18	4	0
Callithrix jacchus (Marmoset)	calJac3	44350	1884	0.000202931		9	0.000131069	0.0716331		1	0	0	0	0
Canis lupus familiaris (Dog)	canFam3	45065	1786	6.65705e-05		3	0.000151161	0.907914		0	0	0	0	0
Cavia porcellus (Guinea pig)	cavPor3	48262	1020	6.21607e-05		3	7.49675e-05	0.488625		1	0	0	0	0
Caenorhabditis briggsae	cb3	19543	9493	0.258609		5054	0.0184754	<1E-20		112	63	25	6	0
Caenorhabditis elegans	ce11	13804	4551	0.491597		6786	0.014291	<1E-20		206	56	7	0	0
Ceratotherium simum (White rhinoceros)	cerSim1	52020	2663	0.000134564		7	0.000229663	0.908183		0	0	0	0	0
Chlorocebus sabaeus (Green Monkey)	chlSab2	45445	1938	0.000198042		9	0.000144865	0.129871		0	0	0	0	0
Choloepus hoffmanni (Sloth)	choHof1	38365	1832	0.000208523		8	0.000151171	0.132767		0	0	0	0	0
Cricetulus griseus (Chinese hamster)	criGri1	54112	436	5.54406e-05		3	3.4861e-05	0.122978		0	0	0	0	0
Cricetulus griseus (Chinese hamster)	criGriChoV1	53972	442	7.41125e-05		4	3.4581e-05	0.0414007		0	0	0	0	0
Danio rerio (Zebrafish)	danRer7	14500	41683	0.00668966		97	0.00641276	0.314541		2	0	0	0	0
Dasypus novemcinctus (Armadillo)	dasNov3	56039	2101	8.92236e-05		5	0.000117045	0.639501		0	0	0	0	0
Dipodomys ordii (Kangaroo rat)	dipOrd1	37810	493	5.28961e-05		2	4.45897e-05	0.239067		1	0	0	0	0
Drosophila melanogaster	dm6	1724	1	0		0	3.92413e-06	0.00674239		0	0	0	0	0
Drosophila pseudoobscura	dp2	1597	9	0		0	1.23523e-05	0.0195334		0	0	0	0	0
Drosophila ananassae	droAna2	2328	85	0		0	0.000103342	0.213839		0	0	0	0	0
Drosophila erecta	droEre1	1491	3	0		0	1.74013e-06	0.00259117		0	0	0	0	0
Drosophila mojavensis	droMoj2	2035	68	0		0	9.68754e-05	0.178933		0	0	0	0	0
Drosophila persimilis	droPer1	2128	13	0		0	1.18753e-05	0.0249542		0	0	0	0	0
Drosophila sechellia	droSec1	2080	26	0		0	3.3504e-05	0.0673166		0	0	0	0	0
Echinops telfairi (Tenrec)	echTel2	41136	568	2.43096e-05		1	3.55311e-05	0.429246		0	0	0	0	0
Erinaceus europaeus (Hedgehog)	eriEur2	44925	334	2.22593e-05		1	2.18255e-05	0.257072		3	1	0	0	0
Felis catus (Cat)	felCat8	50655	1964	9.87069e-05		5	0.000145148	0.74205		1	0	0	0	0
Galeopterus variegatus (Malayan flying lemur)	galVar1	53932	2557	0.000111251		6	0.000159542	0.754804		1	0	0	0	0
Gorilla gorilla gorilla (Gorilla)	gorGor5	46675	2086	0.000192823		9	0.000136972	0.113622		6	0	0	0	0
Heterocephalus glaber (Naked mole-rat)	hetGla2	45289	1428	6.62413e-05		3	0.000110416	0.735079		0	0	0	0	0
Homo sapiens (Human)	hg38	47313	2195	0.000190223		9	0.000136727	0.119953		0	0	0	0	0
Loxodonta africana (Elephant)	loxAfr3	72411	2270	9.66704e-05		7	0.00013794	0.778746		1	0	0	0	0
Notamacropus eugenii (Wallaby)	macEug2	34726	669	0		0	3.45505e-05	0.698751		0	0	0	0	0
Macaca fascicularis (Crab-eating macaque)	macFas5	45315	1923	0.00019861		9	0.000136297	0.0965791		0	0	0	0	0
Manis pentadactyla (Chinese pangolin)	manPen1	39353	1479	0.000152466		6	0.000146781	0.357812		0	0	0	0	0
Microcebus murinus (Mouse lemur)	micMur2	49321	1976	0.000202753		10	0.000164073	0.193361		9	2	0	0	0
Mus musculus (Mouse)	mm10	55035	419	1.81703e-05		1	2.84792e-05	0.464461		0	0	0	0	0
Monodelphis domestica (Opossum)	monDom5	50188	669	0		0	2.86477e-05	0.762548		0	0	0	0	0
Mustela putorius furo (Ferret)	musFur1	51805	1590	0.000135122		7	0.000127903	0.345747		0	0	0	0	0
Myotis lucifugus (Microbat)	myoLuc2	39618	8217	0.000126205		5	0.00119272	1		0	0	0	0	0
Nasalis larvatus (Proboscis Monkey)	nasLar1	40661	1873	0.000172155		7	0.000125781	0.145575		0	0	0	0	0
Nomascus leucogenys (Gibbon)	nomLeu3	43304	2056	0.000161648		7	0.000141117	0.271419		0	0	0	0	0
Ochotona princeps (Pika)	ochPri3	48063	355	0		0	2.88775e-05	0.750415		4	0	0	0	0
Oryctolagus cuniculus (Rabbit)	oryCun2	49874	971	2.00505e-05		1	6.59012e-05	0.839792		13	0	0	0	0
Otolemur garnettii (Bushbaby)	otoGar3	42231	1462	0.000118396		5	0.000113741	0.349582		0	0	0	0	0
Ovis aries (Sheep)	oviAri4	47922	1412	4.17345e-05		2	0.000103019	0.869942		0	0	0	0	0
Pan paniscus (Bonobo)	panPan2	43373	2104	0.000184447		8	0.000129162	0.114498		0	0	0	0	0
Pan troglodytes (Chimpanzee)	panTro6	45901	2132	0.000152502		7	0.000140176	0.317643		0	0	0	0	0
Papio anubis (Baboon )	papAnu2	45709	2094	0.000153143		7	0.000143572	0.336403		0	0	0	0	0
Papio hamadryas (Baboon)	papHam1	45046	2114	0.000155397		7	0.000148332	0.353985		0	0	0	0	0
Petromyzon marinus (Lamprey)	petMar3	11580	61228	0.00397237		46	0.0178575	1		7	0	0	0	0
Pongo pygmaeus abelii (Orangutan)	ponAbe3	46641	2150	0.000171523		8	0.000140491	0.214708		0	0	0	0	0
Procavia capensis (Rock hyrax)	proCap1	39092	1028	0.000102323		4	6.32692e-05	0.10528		0	0	0	0	0
Pteropus vampyrus (Megabat)	pteVam1	36478	1748	0.000109655		4	0.000183606	0.797615		0	0	0	0	0
Macaca mulatta (Rhesus macaque)	rheMac8	48319	2072	0.000144871		7	0.000127981	0.281697		0	0	0	0	0
Rhinopithecus roxellana (Golden snub-nosed monkey)	rhiRox1	45647	2050	0.000219072		10	0.000140705	0.062607		0	0	0	0	0
Rattus norvegicus (Rat)	rn6	56772	364	5.2843e-05		3	2.27418e-05	0.0422101		1	0	0	0	0
Saimiri boliviensis (Squirrel monkey)	saiBol1	40416	1802	0.000173199		7	0.000140077	0.210848		0	0	0	0	0
Sarcophilus harrisii (Tasmanian devil)	sarHar1	39007	617	7.69093e-05		3	3.01396e-05	0.0316935		1	0	0	0	0
Sorex araneus (Shrew)	sorAra2	47764	314	6.28088e-05		3	2.29981e-05	0.0256282		6	0	0	0	0
Spermophilus tridecemlineatus (Squirrel)	speTri2	56082	1569	1.7831e-05		1	0.000130481	0.994481		0	0	0	0	0
Strongylocentrotus purpuratus	strPur2	15472	13313	0.000840228		13	0.00539585	1		3	0	0	0	0
Sus scrofa (Pig)	susScr3	47843	1717	2.09017e-05		1	0.000120031	0.978386		0	0	0	0	0
Tarsius syrichta (Tarsier)	tarSyr2	58461	1960	0.000102633		6	0.000106182	0.426992		1	0	0	0	0
Trichechus manatus latirostris (Manatee)	triMan1	58168	2171	0.000103149		6	0.000139617	0.701227		0	0	0	0	0
Tupaia belangeri (Tree shrew)	tupBel1	33941	965	5.89258e-05		2	4.78918e-05	0.223248		0	0	0	0	0
Tursiops truncatus (Dolphin)	turTru2	42782	2085	0.000140246		6	0.000166132	0.56619		0	0	0	0	0
Vicugna pacos (Alpaca)	vicPac2	40761	1777	9.8133e-05		4	0.000167487	0.810649		0	0	0	0	0
Xenopus tropicalis (Western clawed frog)	xenTro9	21536	7792	0.000371471		8	0.00514609	1		1	0	0	0	0
