# Supplementary material for: Diversification of the Caenorhabditis heat shock response by Helitron transposable elements
Source: eLife. 2019 Dec 11;8:e51139. doi: 10.7554/eLife.51139 (PMC6927752; doi:10.7554/eLife.51139)
Supplement: Supplementary file 6. — Analysis of HSEs located within annotated Helitrons for species available through the Caenorhabditis Genome Project. [file elife-51139-supp6.xlsx]

## Sheet: Sheet1
Caenorhabditis Genomes Project (CGP)
Genome statistics						Significance of overlap				1kb windows with pileups of HSEs
Organism name	Genome assembly	Total # HSEs	Total # helitrons	Percent HSEs inside helitrons		# HSEs overlapping helitrons	Percent genome in helitrons	p-value from binomial distribution		>10	>25	>50	>75	>100
Caenorhabditis afra	Caenorhabditis_afra_JU1286_v1	3944	476	0.00380325		15	0.00158191	0.000755546		1	0	0	0	0
Caenorhabditis angaria	Caenorhabditis_angaria_PS1010_PRJNA51225	10007	1354	0.0400719		401	0.0027854	<1E-20		2	0	0	0	0
Caenorhabditis brenneri	Caenorhabditis_brenneri_C_brenneri-6	12590	3116	0.120572		1518	0.002863	<1E-20		107	20	0	0	0
Caenorhabditis briggsae	Caenorhabditis_briggsae_CB4	19543	6503	0.216395		4229	0.0111577	<1E-20		109	61	23	4	0
Caenorhabditis castelli	Caenorhabditis_castelli_JU1956_v1	8182	795	0.0321437		263	0.00219823	<1E-20		8	1	0	0	0
Caenorhabditis doughertyi	Caenorhabditis_doughertyi_JU1771_v1	12844	2220	0.0754438		969	0.00246462	<1E-20		33	3	0	0	0
Caenorhabditis elegans	Caenorhabditis_elegans_WBcel235	13804	3831	0.461968		6377	0.0128345	<1E-20		206	56	7	0	0
Caenorhabditis japonica	Caenorhabditis_japonica_C_japonica-7	6184	1897	0.0208603		129	0.00160626	<1E-20		1	0	0	0	0
Caenorhabditis kamaaina	Caenorhabditis_kamaaina_QG2077_v1	6830	1941	0.0259151		177	0.00351455	<1E-20		3	0	0	0	0
Caenorhabditis latens	Caenorhabditis_latens_PX534_v1	8254	687	0.0224134		185	0.000752796	<1E-20		5	0	0	0	0
Caenorhabditis monodelphis	Caenorhabditis_monodelphis_JU1667_v1	6606	166	0.00181653		12	0.000118268	3.11307e-12		0	0	0	0	0
Caenorhabditis nouraguensis	Caenorhabditis_nouraguensis_JU2079_v1	7352	547	0.0590316		434	0.00112509	<1E-20		6	0	0	0	0
Caenorhabditis plicata	Caenorhabditis_plicata_SB355_v1	3306	226	0.0196612		65	0.000344421	<1E-20		3	0	0	0	0
Caenorhabditis remanei	Caenorhabditis_remanei_PX439_v1	9650	961	0.0455959		440	0.00119561	<1E-20		11	0	0	0	0
Caenorhabditis sinica	Caenorhabditis_sinica_JU800_v1	12400	3110	0.0337097		418	0.00278377	<1E-20		7	0	0	0	0
Caenorhabditis sp21	Caenorhabditis_sp21_NIC534_v1	5778	505	0.029595		171	0.000437564	<1E-20		0	0	0	0	0
Caenorhabditis sp26	Caenorhabditis_sp26_JU2190_v1	11343	2797	0.0527197		598	0.00438607	<1E-20		8	0	0	0	0
Caenorhabditis sp28	Caenorhabditis_sp28_QG2080_v1	5180	375	0.011583		60	0.000731053	<1E-20		0	0	0	0	0
Caenorhabditis sp29	Caenorhabditis_sp29_QG2083_v1	11172	1114	0.0803795		898	0.00209585	<1E-20		13	0	0	0	0
Caenorhabditis sp31	Caenorhabditis_sp31_JU2585_v1	4385	351	0.0127708		56	0.000801706	<1E-20		0	0	0	0	0
Caenorhabditis sp32	Caenorhabditis_sp32_JU2788_v1	4592	353	0.0250436		115	0.000871014	<1E-20		6	1	0	0	0
Caenorhabditis sp34	Caenorhabditis_sp34_NK74SC_v710	13972	2987	0.127255		1778	0.00343544	<1E-20		39	4	0	0	0
Caenorhabditis sp38	Caenorhabditis_sp38_JU2809_v1	5874	719	0.0386449		227	0.00169175	<1E-20		4	0	0	0	0
Caenorhabditis sp39	Caenorhabditis_sp39_NIC564_v1	5610	446	0.0194296		109	0.000802376	<1E-20		0	0	0	0	0
Caenorhabditis sp40	Caenorhabditis_sp40_JU2818_v1	13399	3055	0.122621		1643	0.00483052	<1E-20		15	3	1	0	0
Caenorhabditis tropicalis	Caenorhabditis_tropicalis_JU1373_301	6960	481	0.0389368		271	0.000939822	<1E-20		7	2	0	0	0
Caenorhabditis virilis	Caenorhabditis_virilis_JU1968_v1	12831	878	0.30855		3959	0.00201052	<1E-20		158	47	14	5	0
