# Supplementary material for: Diversification of the Caenorhabditis heat shock response by Helitron transposable elements
Source: eLife. 2019 Dec 11;8:e51139. doi: 10.7554/eLife.51139 (PMC6927752; doi:10.7554/eLife.51139)
Supplement: Supplementary file 7. — RNA-seq results showing fold change in gene expression of C. briggsae subjected to heat shock at 34°C versus control animals at 20°C for 30 min. [file elife-51139-supp7.xlsx]

## Sheet: Supplemental.Table.7_AF16.expre
	WormBase.ID	BaseMean	log2(FC)	StdErr	Wald-Stats	P-value	P-adj	chrom	start	end	strand	gene.name
1	WBGene00000307	4807.19	-0.27491	0.116856	-2.35255	0.0186452	0.0557629	chrI	9581885	9591354	+	Cbr-bli-4
2	WBGene00000312	1690.6	-0.146944	0.126171	-1.16464	0.244164	0.403289	chrIII	10299614	10300924	-	Cbr-glb-1
3	WBGene00000324	723.295	-0.443725	0.100066	-4.43431	9.23678e-06	8.4383e-05	chrV	11874411	11883367	+	Cbr-exp-2
4	WBGene00000328	1495.46	-0.242291	0.0711943	-3.40323	0.00066594	0.00346219	chrIII	120404	123973	-	Cbr-fem-2
5	WBGene00000329	276.192	0.00780382	0.134623	0.057968	0.953774	0.97405	chrIV	4390949	4394091	-	Cbr-fem-3
6	WBGene00000332	20311.3	0.273109	0.0731336	3.73439	0.000188169	0.00116823	chrX	8164674	8165942	-	CBG14137
7	WBGene00000333	27295	0.272117	0.0537265	5.06486	4.08697e-07	5.31419e-06	chrX	8163283	8164564	-	CBG14136
9	WBGene00000343	463.653	-0.523064	0.128814	-4.06061	4.89455e-05	0.000363637	chrX	8165919	8167990	-	Cbr-mai-1
10	WBGene00000365	4.51586	0.663704	0.35557	1.86659	0.0619584	0.143998	chrX	13321444	13326552	+	CBG16767
12	WBGene00023521	482.965	0.0803775	0.148235	0.542228	0.587661	0.729544	chrIII	12070280	12073911	+	CBG00001
13	WBGene00023522	54.5459	0.257614	0.314899	0.818083	0.41331	0.581137	chrIII	12076608	12077007	-	CBG00002
14	WBGene00023523	86.7174	0.200041	0.248529	0.804899	0.420878	0.587586	chrIII	12079255	12080347	+	CBG00003
21	WBGene00023525	23224.5	-0.740041	0.153613	-4.81757	1.45321e-06	1.64425e-05	chrIII	12091221	12113489	+	Cbr-fbn-1
30	WBGene00023526	4962.14	0.122188	0.130748	0.93453	0.350031	0.519569	chrIII	12114106	12118645	-	Cbr-upp-1
31	WBGene00023527	2848.81	-0.280545	0.0688069	-4.07728	4.5566e-05	0.000341508	chrIII	12120409	12129071	-	Cbr-baz-2
32	WBGene00023528	696.661	0.360984	0.180837	1.99619	0.0459133	0.113736	chrIII	12141108	12144449	+	CBG00011
33	WBGene00023529	5.87891	0.602739	0.428075	1.40802	0.159125	0.294645	chrIII	12148499	12164409	+	CBG00014
34	WBGene00023530	5.08271	0.403743	0.421188	0.958582	0.337769	0.506668	chrIII	12160689	12161004	-	CBG00015
35	WBGene00023532	10.493	0.320904	0.426757	0.751961	0.452075	0.616845	chrIII	12169374	12170807	-	CBG00017
36	WBGene00023533	5719.87	-0.130046	0.0690111	-1.88443	0.0595075	0.139468	chrIII	12173529	12190803	-	Cbr-lin-13
37	WBGene00023536	21163.9	-0.0938179	0.0730822	-1.28373	0.199236	0.348429	chrIII	12201638	12206129	+	Cbr-egl-45
38	WBGene00023537	262.544	-0.355578	0.17037	-2.0871	0.036879	0.0957066	chrIII	12216599	12219809	-	Cbr-egl-5
39	WBGene00023538	410.98	0.221677	0.111989	1.97946	0.0477645	0.117249	chrIII	12245937	12250179	+	Cbr-cyk-7
41	WBGene00023539	220.071	-0.41348	0.148112	-2.79168	0.00524357	0.0197843	chrIII	12269854	12281720	+	Cbr-mab-5
43	WBGene00023540	710.21	0.0688969	0.135881	0.50704	0.612127	0.747583	chrIII	12284341	12285499	+	Cbr-snu-23
44	WBGene00023541	3331.09	-0.0461404	0.0740034	-0.62349	0.532963	0.686002	chrIII	12286423	12288535	+	CBG00031
45	WBGene00023542	1916.46	-0.229563	0.110261	-2.082	0.0373426	0.0966553	chrIII	12292055	12297456	+	CBG00032
46	WBGene00023543	1446.66	0.139789	0.0765197	1.82683	0.0677254	0.154151	chrIII	12298627	12301453	+	Cbr-mtx-2
47	WBGene00023544	88.353	0.0689377	0.317051	0.217434	0.82787	0.898402	chrIII	12301886	12302720	-	CBG00034
48	WBGene00023545	5305.83	0.111577	0.0823678	1.35462	0.17554	0.316899	chrIII	12302904	12307278	-	Cbr-pcp-1.2
49	WBGene00023546	114.554	0.446043	0.251071	1.77657	0.0756398	0.167496	chrIII	12310288	12314275	+	Cbr-pcp-1.1
50	WBGene00023547	952.899	-0.41166	0.0936794	-4.39435	1.11106e-05	9.94647e-05	chrIII	12321799	12342267	+	Cbr-cdh-3
51	WBGene00023548	1390.84	0.142412	0.0957658	1.48709	0.136991	0.263452	chrIII	12345317	12354612	-	CBG00040
52	WBGene00023549	1.32048	0.467013	0.335787	1.3908	0.164286	NA	chrIII	12355445	12357284	+	CBG00041
57	WBGene00023550	3.11334	0.423786	0.363436	1.16605	0.243593	0.402629	chrIII	12357922	12358800	+	CBG00042
58	WBGene00023551	29.4971	-0.198419	0.363012	-0.54659	0.584661	0.727297	chrIII	12364837	12365446	+	CBG00043
59	WBGene00023552	1346.26	0.423731	0.0864184	4.90325	9.42624e-07	1.11151e-05	chrX	14050805	14064769	-	Cbr-pqn-18
60	WBGene00023553	69.0166	-0.316957	0.225487	-1.40566	0.159826	0.295745	chrX	14090339	14091105	+	Cbr-gpc-1
61	WBGene00023554	5646.24	0.233911	0.11103	2.10674	0.0351405	0.0921265	chrX	14092331	14095144	-	Cbr-bcat-1
62	WBGene00023555	7409.76	-0.0700806	0.0627774	-1.11634	0.264279	0.427025	chrX	14100949	14112218	-	CBG00051
63	WBGene00023556	202.13	0.920578	0.193187	4.76521	1.88654e-06	2.06714e-05	chrX	14109120	14110060	+	CBG00052
64	WBGene00023557	107.658	-0.11156	0.201653	-0.553229	0.580107	0.723425	chrX	14119408	14120793	+	CBG00055
65	WBGene00023558	2.21483	-0.0633063	0.33371	-0.189704	0.849541	0.912344	chrX	14122594	14126855	-	CBG00056
66	WBGene00023559	16.9585	0.189634	0.388702	0.487865	0.625645	0.756988	chrX	14139270	14141475	+	CBG00059
67	WBGene00023560	10.5644	0.311491	0.411955	0.756129	0.449572	0.614729	chrX	14143229	14144941	+	CBG00060
68	WBGene00023561	0.761118	0.326865	0.257771	1.26804	0.204783	NA	chrX	14146715	14147335	+	CBG00061
69	WBGene00023562	163.328	-0.40942	0.188481	-2.1722	0.0298403	0.0810432	chrX	14147419	14149188	-	CBG00062
70	WBGene00023564	947.685	0.0809027	0.0880541	0.918784	0.358209	0.52782	chrX	14175296	14193774	+	Cbr-gei-3
71	WBGene00023565	311.606	-0.26349	0.215073	-1.22512	0.220532	0.374851	chrX	14194857	14195754	-	Cbr-abf-6
72	WBGene00023566	452.138	0.159875	0.186755	0.856067	0.391961	0.560966	chrX	14197072	14197858	-	Cbr-abf-5
76	WBGene00023567	9.66721	0.316223	0.420637	0.75177	0.452189	0.616912	chrX	14198140	14200349	-	Cbr-str-123
77	WBGene00023568	2.09228	0.445254	0.30852	1.44319	0.148967	0.280719	chrX	14200870	14202262	-	Cbr-str-124
78	WBGene00023569	658.757	-0.436792	0.233736	-1.86874	0.0616585	0.143444	chrX	14205097	14209379	-	Cbr-alh-13
80	WBGene00023570	14.1294	0.453388	0.402191	1.12729	0.259618	0.421586	chrX	14219756	14222407	+	Cbr-ilc-17.1
81	WBGene00023571	1308.88	0.0949046	0.117363	0.808638	0.418723	0.585931	chrX	14223502	14225932	-	Cbr-cept-1
82	WBGene00023572	302.977	-0.145322	0.354831	-0.409552	0.682134	0.799321	chrX	14231344	14235845	+	CBG00078
83	WBGene00023573	6861.77	-0.170138	0.191393	-0.888943	0.374034	0.544289	chrX	14237855	14242632	+	Cbr-pgp-14
84	WBGene00023574	197.632	-0.872955	0.1603	-5.44576	5.15854e-08	8.20506e-07	chrX	14248858	14254058	+	CBG00082
85	WBGene00023575	4529.98	-0.403152	0.341493	-1.18056	0.237779	0.395513	chrX	14254220	14258745	-	Cbr-pgp-13
86	WBGene00023576	335.071	-0.71049	0.142706	-4.9787	6.40112e-07	7.91669e-06	chrX	14260186	14274579	+	Cbr-rgs-2
92	WBGene00023577	1005.05	-0.107954	0.133138	-0.810844	0.417455	0.584812	chrX	14276795	14281754	+	Cbr-pgp-12
93	WBGene00023578	6.56847	-0.275995	0.425422	-0.648756	0.516496	0.672708	chrX	14290110	14291344	+	Cbr-nhr-27
96	WBGene00023579	480.276	-0.801816	0.205156	-3.90833	9.29376e-05	0.000638333	chrX	14291433	14294463	-	Cbr-ugt-50
97	WBGene00023580	407.206	0.749642	0.398372	1.88176	0.0598683	0.140114	chrX	14299882	14311936	-	Cbr-adt-1
98	WBGene00023581	1064.26	1.19781	0.157779	7.59172	3.15683e-14	1.50508e-12	chrX	14322119	14327178	+	Cbr-nhr-17
100	WBGene00023582	121.929	-0.578511	0.177583	-3.2577	0.00112317	0.00540583	chrX	14327333	14328015	+	Cbr-nlp-76
101	WBGene00023583	37.6679	-0.809479	0.304203	-2.66099	0.00779121	0.0275441	chrX	14345449	14349521	-	Cbr-zmp-5
102	WBGene00023584	491.86	0.10591	0.182284	0.581014	0.561231	0.708309	chrX	14355003	14356430	+	CBG00099
103	WBGene00023585	172.684	0.176194	0.377681	0.466516	0.640846	0.767892	chrX	14359575	14360642	+	Cbr-col-182
104	WBGene00023586	3864.05	0.166452	0.0896507	1.85668	0.0633572	0.146499	chrX	14362247	14372793	+	Cbr-ivns-1
105	WBGene00023587	585.364	-0.0382809	0.126223	-0.303281	0.761676	0.855407	chrX	14384214	14386717	+	CBG00105
106	WBGene00023588	2.25107	0.366354	0.40205	0.911216	0.362182	0.531584	chrX	14392481	14393252	+	CBG00107
107	WBGene00023589	250.227	-0.349376	0.142421	-2.45312	0.0141623	0.0446581	chrX	14406323	14421356	+	Cbr-npr-4
108	WBGene00023591	3420.83	0.0442589	0.0666373	0.664176	0.506578	0.664899	chrX	14433848	14454899	+	Cbr-scd-1
112	WBGene00023592	248.809	-0.814142	0.153012	-5.32076	1.03335e-07	1.52696e-06	chrX	14460130	14463704	-	Cbr-lips-1
113	WBGene00023593	439.472	0.14649	0.151939	0.96414	0.334976	0.503808	chrX	14465806	14473524	-	Cbr-tbc-13
114	WBGene00023594	831.115	0.190669	0.117484	1.62293	0.104605	0.214561	chrX	14473661	14478374	-	Cbr-atf-6
115	WBGene00023595	2.57938	0.450134	0.387923	1.16037	0.245899	0.405335	chrX	14481489	14482641	+	CBG00119
116	WBGene00023596	43461.9	0.0309782	0.110875	0.279396	0.779941	0.867954	chrX	14483141	14490633	-	CBG00120
117	WBGene00023597	567.769	0.249918	0.178844	1.39741	0.162291	0.299061	chrX	14491647	14493506	+	Cbr-cdf-2
118	WBGene00023598	21.6126	0.679847	0.335524	2.02622	0.0427419	0.107421	chrX	14493495	14494084	-	CBG00122
119	WBGene00023599	24.4917	0.383157	0.351493	1.09008	0.275676	0.44054	chrX	14496552	14498481	+	Cbr-odr-7
120	WBGene00023600	1432.55	-0.144107	0.113207	-1.27295	0.203035	0.353326	chrX	14498881	14502699	-	CBG00124
121	WBGene00023601	141.17	-0.00966523	0.181403	-0.0532804	0.957508	0.975789	chrX	14503289	14506065	+	CBG00125
122	WBGene00023602	505.607	1.72222	0.209577	8.2176	2.07613e-16	1.263e-14	chrX	14506618	14507594	-	CBG00126
123	WBGene00023603	120.212	0.0703617	0.175122	0.401787	0.687841	0.803596	chrX	14514894	14523193	-	CBG00127
125	WBGene00023604	1.23542	0.276322	0.315264	0.876479	0.380769	NA	chrX	14529193	14530920	-	CBG00128
126	WBGene00023605	7.76873	0.181798	0.425351	0.427407	0.669083	0.788912	chrX	14531238	14533503	-	CBG00129
128	WBGene00023606	259.263	-0.0165032	0.127848	-0.129085	0.897291	0.941911	chrX	14537917	14539143	-	CBG00131
129	WBGene00023607	1478.99	-0.538596	0.100052	-5.38316	7.31875e-08	1.12587e-06	chrX	14551203	14566650	+	Cbr-lin-2
131	WBGene00023609	1272.67	0.046659	0.0864672	0.539615	0.589463	0.730353	chrX	14566644	14572765	-	CBG00135
132	WBGene00023610	203.732	0.551709	0.147481	3.74088	0.00018338	0.00114266	chrX	14574670	14576606	+	Cbr-nekl-3
133	WBGene00023612	190.045	-0.457847	0.164754	-2.77898	0.00545305	0.0204793	chrX	14585475	14587907	+	Cbr-glb-13
134	WBGene00023613	1.06077	0.0443468	0.259956	0.170594	0.864543	NA	chrX	14591363	14592223	+	CBG00140
135	WBGene00023614	971.86	0.156654	0.0813307	1.92613	0.0540881	0.129399	chrX	14596224	14597015	+	CBG00142
136	WBGene00023615	388.664	-0.080698	0.138819	-0.581318	0.561026	0.708161	chrX	14597009	14599029	-	CBG00143
138	WBGene00023616	34.6348	-0.121531	0.35379	-0.343512	0.731213	0.83536	chrX	14609484	14614106	-	CBG00148
139	WBGene00023617	2.96519	-0.364577	0.412191	-0.884484	0.376435	0.54668	chrX	14619757	14620165	+	CBG00150
140	WBGene00023618	1.08106	0.0289052	0.328626	0.0879577	0.92991	NA	chrX	14628727	14629232	+	CBG00152
141	WBGene00023619	0	NA	NA	NA	NA	NA	chrX	14637841	14638209	+	CBG00154
142	WBGene00023620	3.71965	0.591997	0.423703	1.3972	0.162354	0.299107	chrX	14661256	14662149	+	CBG00164
143	WBGene00023621	0.921136	0.154168	0.215033	0.71695	0.473405	NA	chrX	14663306	14665954	-	CBG00165
144	WBGene00023623	1.38458	0.292005	0.281921	1.03577	0.300311	NA	chrX	14671941	14672898	-	CBG00168
146	WBGene00023624	140.193	4.81751	0.307547	15.6643	2.65417e-55	7.53503e-53	chrX	14676239	14677147	-	CBG00170
147	WBGene00023625	25.0209	2.18796	0.422444	5.17929	2.22727e-07	3.07307e-06	chrX	14677881	14678402	+	CBG00171
148	WBGene00023626	332.075	-0.126449	0.132723	-0.952732	0.340726	0.509795	chrX	14678442	14682728	-	Cbr-tsp-11
149	WBGene00023627	1764.36	0.228217	0.0730175	3.12551	0.00177498	0.00799853	chrX	14685232	14696683	-	Cbr-tmbi-4
150	WBGene00023628	281.649	1.09784	0.256071	4.28722	1.8092e-05	0.000152698	chrX	14691545	14693884	+	CBG00175
151	WBGene00023630	137.069	1.62796	0.250812	6.49078	8.53957e-11	2.37397e-09	chrX	14708032	14710559	+	CBG00178
152	WBGene00023631	12.6921	0.946411	0.397854	2.37879	0.0173695	0.0526367	chrX	14712924	14715084	-	CBG00180
153	WBGene00023632	66.4533	2.07112	0.345318	5.99772	2.00104e-09	4.20331e-08	chrX	14717400	14718294	-	CBG00181
154	WBGene00023633	125.686	-0.747445	0.211308	-3.53723	0.000404346	0.00224881	chrX	14718779	14723751	-	CBG00182
156	WBGene00023634	1234.84	0.633217	0.131892	4.80102	1.57861e-06	1.76588e-05	chrX	14735326	14740328	-	CBG00185
158	WBGene00023636	5865.66	0.125723	0.0676493	1.85845	0.0631052	0.146099	chrX	14743666	14775575	-	Cbr-ajm-1
159	WBGene00023640	16.4648	0.822467	0.374841	2.19418	0.0282228	0.0775269	chrX	14784416	14786271	+	Cbr-taf-11.2
160	WBGene00023641	1163.09	0.0211507	0.0884562	0.239109	0.811021	0.886898	chrX	14800146	14803249	-	CBG00196
161	WBGene00023642	16.3258	-0.819654	0.388994	-2.10711	0.035108	0.0920542	chrX	14806135	14810656	-	CBG00197
162	WBGene00023643	2.47937	-0.271181	0.367638	-0.737631	0.460739	0.624348	chrX	14811927	14813936	-	CBG00198
163	WBGene00023644	191.861	-0.784096	0.269109	-2.91368	0.00357201	0.0143995	chrX	14823786	14826584	-	CBG00199
164	WBGene00023645	14236.4	-0.309073	0.140908	-2.19345	0.0282753	0.0776472	chrX	14828946	14832520	-	Cbr-nep-22
165	WBGene00023646	335.552	-0.0524697	0.116215	-0.451487	0.651639	0.775616	chrX	14832776	14836604	-	Cbr-snf-12
166	WBGene00023648	5.57035	0.251981	0.428069	0.588647	0.556098	0.703927	chrX	14849079	14849702	-	CBG00204
167	WBGene00023649	7.84279	-0.102458	0.415384	-0.246658	0.805173	0.883353	chrX	14853467	14854197	-	CBG00205
168	WBGene00023650	4.12381	-0.664703	0.420424	-1.58103	0.113871	0.228904	chrX	14857303	14859417	-	CBG00206
169	WBGene00023651	8.65295	-0.499063	0.420652	-1.1864	0.235463	0.392759	chrX	14862753	14864514	-	CBG00208
170	WBGene00023652	3.16233	0.992624	0.391597	2.53481	0.0112509	0.0371598	chrX	14866589	14868646	-	Cbr-srg-38
171	WBGene00023653	447.505	0.0992835	0.10776	0.921341	0.356872	0.526585	chrX	14879927	14881532	+	CBG00212
172	WBGene00023654	68.2836	-0.152969	0.245939	-0.621981	0.533954	0.686806	chrX	14887266	14889169	+	CBG00215
173	WBGene00023656	21.4123	-0.881407	0.346344	-2.54489	0.0109313	0.0363348	chrX	14893666	14894935	+	CBG00217
174	WBGene00023657	27.2872	0.0396769	0.345482	0.114845	0.908568	0.94874	chrX	14906540	14907637	+	CBG00220
176	WBGene00023658	14.8354	0.387608	0.386768	1.00217	0.31626	0.483697	chrX	14912530	14913958	+	CBG00223
177	WBGene00023659	97.7415	0.125594	0.259007	0.484905	0.627744	0.758303	chrX	14916175	14916750	-	CBG00224
178	WBGene00023661	3.53314	0.851604	0.362186	2.35129	0.0187083	0.0558983	chrX	14923040	14925734	+	CBG00227
179	WBGene00023662	54.5964	-0.0656253	0.26709	-0.245705	0.805911	0.883785	chrX	14938217	14946107	-	CBG00230
180	WBGene00023663	1361.34	-0.116484	0.0911407	-1.27807	0.201226	0.351059	chrX	14946236	14948500	-	CBG00231
181	WBGene00023664	219.018	-0.0552815	0.153282	-0.360653	0.718359	0.827071	chrX	14951251	14953608	-	CBG00232
182	WBGene00023665	4618.08	0.237875	0.0606806	3.92012	8.85058e-05	0.000612609	chrX	14953993	14958447	-	Cbr-twk-18
183	WBGene00023666	78.0409	-0.0491106	0.249506	-0.196831	0.84396	0.909428	chrX	14961341	14965235	-	Cbr-nmur-1
184	WBGene00023667	75.1408	-0.435391	0.257349	-1.69183	0.090678	0.192591	chrX	14980561	14984012	+	Cbr-aexr-3
185	WBGene00023669	0.572916	0.0950388	0.23219	0.409315	0.682308	NA	chrX	14995446	14996491	+	CBG00238
186	WBGene00023670	2.04486	-0.486004	0.375359	-1.29477	0.195399	0.343419	chrX	14997110	14997833	-	CBG00239
187	WBGene00023671	541.464	-0.786405	0.166045	-4.73608	2.17889e-06	2.35036e-05	chrX	15005086	15013838	+	Cbr-trk-1
191	WBGene00023672	13.6828	-0.330175	0.381439	-0.865603	0.386708	0.556466	chrX	15014025	15014770	+	Cbr-dylt-2
192	WBGene00023673	4043.36	0.232229	0.103655	2.24041	0.0250645	0.0705473	chrX	15014835	15019247	-	Cbr-acs-22
194	WBGene00023674	2.14926	-0.244312	0.382564	-0.638617	0.523072	0.677834	chrX	15031877	15032125	+	CBG00244
195	WBGene00023675	2.14926	-0.244312	0.382564	-0.638617	0.523072	0.677834	chrX	15038515	15038763	+	CBG00245
196	WBGene00023676	756.014	-0.299947	0.108766	-2.75773	0.00582036	0.0215894	chrX	15040803	15042567	+	Cbr-nlp-14
197	WBGene00023677	1482.86	-0.0216537	0.0841245	-0.257401	0.79687	0.878136	chrX	15047456	15053457	-	Cbr-cyn-8
198	WBGene00023678	287.738	0.484798	0.137504	3.5257	0.000422365	0.00233585	chrX	15053733	15061273	-	Cbr-ensh-1
199	WBGene00023679	299.294	-0.590841	0.144519	-4.08832	4.345e-05	0.000327879	chrX	15066977	15072745	-	CBG00250
200	WBGene00023681	1473.12	-0.0461114	0.0843853	-0.546439	0.584764	0.727297	chrX	15090230	15092977	-	CBG00253
202	WBGene00023682	40.753	0.294941	0.276098	1.06825	0.285409	0.450474	chrX	15098812	15099011	-	CBG00255
203	WBGene00023683	387.667	1.40313	0.154068	9.10724	8.45022e-20	6.97497e-18	chrX	15102344	15103557	-	CBG00256
204	WBGene00023684	1373.72	0.206344	0.0791251	2.60782	0.00911213	0.0313868	chrX	15106310	15108069	-	Cbr-gst-42
205	WBGene00023685	38.3891	-0.387904	0.278709	-1.39179	0.163987	0.30115	chrX	15112507	15114411	+	CBG00258
206	WBGene00023686	612.517	1.3068	0.268693	4.86354	1.15303e-06	1.3336e-05	chrX	15130426	15135876	-	CBG00261
207	WBGene00023688	142.099	-0.800695	0.174404	-4.59105	4.41025e-06	4.40484e-05	chrX	15144885	15155643	+	CBG00263
209	WBGene00023689	31.9686	0.142414	0.388293	0.36677	0.71379	0.823591	chrX	15158088	15166956	+	Cbr-lact-7
211	WBGene00023690	19.5243	-0.806244	0.360954	-2.23365	0.0255062	0.0715214	chrX	15163955	15166943	-	Cbr-ttx-3
212	WBGene00023691	37.1076	2.79391	0.425959	6.55912	5.41276e-11	1.57728e-09	chrX	15206038	15208922	-	CBG00271
213	WBGene00023692	1348.77	0.27423	0.0881515	3.1109	0.00186521	0.00834092	chrX	15219829	15225386	+	Cbr-rsd-3
214	WBGene00023693	0.378461	0.101527	0.17489	0.580517	0.561566	NA	chrX	15225968	15226141	-	CBG00275
215	WBGene00023694	5.44271	0.467521	0.402185	1.16245	0.245052	0.404226	chrX	15228766	15230009	-	CBG00276
216	WBGene00023695	7.28847	0.062542	0.411895	0.15184	0.879313	0.931091	chrX	15231632	15233856	+	CBG00277
217	WBGene00023697	19.8642	0.499412	0.358728	1.39217	0.16387	0.300964	chrI	614093	614934	+	CBG00280
218	WBGene00023698	155.392	0.186881	0.174927	1.06834	0.285367	0.450474	chrI	607936	611304	-	Cbr-del-3
219	WBGene00023699	2161.35	0.0188524	0.163739	0.115137	0.908337	0.948637	chrI	590559	592893	-	CBG00285
220	WBGene00023701	627.565	1.09133	0.185328	5.88868	3.89295e-09	7.77636e-08	chrI	570060	583874	+	CBG00288
221	WBGene00023702	175.407	0.930253	0.192139	4.84156	1.28826e-06	1.47183e-05	chrI	560120	563525	+	CBG00290
222	WBGene00023703	147.784	0.0747993	0.167883	0.445545	0.655926	0.778938	chrI	558118	559179	+	CBG00291
223	WBGene00023704	4362.13	0.128579	0.0594805	2.1617	0.0306412	0.0827864	chrI	554314	557720	-	CBG00292
224	WBGene00023705	2898.17	0.0724368	0.0797515	0.908282	0.363729	0.533146	chrI	546948	552985	-	CBG00293
225	WBGene00023706	3095.99	0.116271	0.0854899	1.36005	0.173814	0.314693	chrI	547370	549189	+	Cbr-bckd-1B
226	WBGene00023708	2487.17	-0.184124	0.0799921	-2.30177	0.021348	0.0621019	chrI	530313	545733	-	CBG00297
228	WBGene00023710	1085.58	-0.726526	0.156765	-4.63449	3.57816e-06	3.66361e-05	chrI	505603	510022	-	Cbr-lsy-22
229	WBGene00023711	6795.11	0.162691	0.0733502	2.218	0.0265549	0.0738657	chrI	501770	505556	+	CBG00301
230	WBGene00023712	55.6621	-0.095531	0.288317	-0.33134	0.740388	0.841787	chrI	499961	500621	-	CBG00302
231	WBGene00023713	277.199	0.454896	0.150128	3.03005	0.00244515	0.0104743	chrI	497041	499733	+	Cbr-gld-1
232	WBGene00023714	562.396	0.0248714	0.127309	0.195363	0.845108	0.909989	chrI	495470	496356	+	CBG00304
233	WBGene00023715	355.346	-0.264072	0.152536	-1.73121	0.0834139	0.180456	chrI	475396	495168	+	Cbr-rlbp-1
234	WBGene00023716	1927.54	-0.237099	0.112631	-2.10509	0.0352833	0.0923457	chrI	479161	488797	-	Cbr-lron-9
235	WBGene00023718	874.908	0.212762	0.0809876	2.6271	0.0086117	0.0299309	chrI	468704	473688	+	CBG00308
237	WBGene00023719	1409.26	0.0490549	0.0896338	0.547282	0.584185	0.727108	chrI	459668	465477	+	CBG00309
238	WBGene00023720	219.121	-0.0499751	0.140879	-0.354736	0.722787	0.829476	chrI	457140	459127	-	CBG00310
239	WBGene00023722	5.78046	0.326285	0.426351	0.765297	0.444095	0.609776	chrI	444252	447471	-	CBG00313
240	WBGene00023723	8.95902	0.591894	0.428048	1.38278	0.166734	0.304908	chrI	441351	444249	-	CBG00314
242	WBGene00023724	4.28654	0.200656	0.410116	0.489267	0.624652	0.756226	chrI	440011	441228	-	CBG00315
243	WBGene00023725	19.6786	-0.271411	0.358319	-0.757456	0.448777	0.613946	chrI	438180	439465	-	CBG00316
244	WBGene00023726	110.302	-1.04763	0.231522	-4.52498	6.04009e-06	5.79484e-05	chrI	434167	437432	-	CBG00317
246	WBGene00023727	102.139	-0.533522	0.202615	-2.63319	0.00845881	0.0294675	chrI	426999	431278	+	Cbr-del-4
247	WBGene00023728	10.7114	-0.656476	0.411807	-1.59414	0.110905	0.224483	chrI	615010	619895	-	CBG00320
250	WBGene00023729	715.977	0.0621788	0.117671	0.528414	0.597212	0.736013	chrI	620999	640478	+	Cbr-ego-1
251	WBGene00023730	238.101	-0.235271	0.136279	-1.72639	0.0842766	0.181797	chrI	640746	653432	+	CBG00322
252	WBGene00023731	0.737942	0.203535	0.211089	0.964218	0.334937	NA	chrIV	1233	4878	+	Cbr-srv-16.2
253	WBGene00023733	225.842	-0.0998382	0.135053	-0.739251	0.459755	0.623532	chrIV	4772	6855	-	CBG00325
254	WBGene00023734	14.674	-0.216531	0.380364	-0.569274	0.56917	0.714662	chrIV	10959	14642	+	CBG00326
255	WBGene00023735	0.405834	0.098241	0.172188	0.570544	0.568309	NA	chrIV	26628	27883	+	CBG00329
256	WBGene00023737	0.351018	0.0165707	0.172256	0.096198	0.923363	NA	chrIV	31393	31692	+	CBG00331
257	WBGene00023739	289.116	-0.082398	0.133862	-0.615547	0.538194	0.69001	chrIV	33724	35169	-	CBG00333
258	WBGene00023740	572.243	0.434665	0.152436	2.85146	0.0043519	0.0169596	chrIV	35501	38678	-	CBG00334
259	WBGene00023741	701.535	0.174981	0.0924818	1.89206	0.0584833	0.137577	chrIV	38731	41034	+	Cbr-arf-6
260	WBGene00023742	1005.48	0.00603512	0.112831	0.0534884	0.957343	0.975789	chrIV	41037	55205	+	CBG00336
262	WBGene00023743	13.5855	1.02998	0.393945	2.61453	0.00893499	0.0308485	chrIV	44953	46968	-	CBG00337
263	WBGene00023744	1107.59	0.208503	0.10147	2.05483	0.0398957	0.101774	chrIV	55543	64198	+	Cbr-rom-4
265	WBGene00023745	12.6048	0.656524	0.400837	1.63788	0.101446	0.209616	chrIV	64539	67992	-	CBG00340
266	WBGene00023746	4.8985	1.25413	0.421904	2.97254	0.00295348	0.012284	chrIV	70089	72569	+	CBG00341
268	WBGene00023747	195.196	-0.390441	0.247467	-1.57775	0.114623	0.230072	chrIV	73331	75821	+	CBG00342
269	WBGene00023748	6.65242	-0.197401	0.426959	-0.462342	0.643836	0.770047	chrIV	81780	84330	+	CBG00344
271	WBGene00023749	63.4376	-0.642552	0.229216	-2.80326	0.00505895	0.0191998	chrIV	86606	96624	-	Cbr-gcy-25
272	WBGene00023750	9.04118	-0.0203451	0.417052	-0.048783	0.961092	0.97791	chrIV	97795	100754	-	Cbr-lgc-19
273	WBGene00023751	1.48962	-0.0993652	0.318438	-0.312039	0.755011	NA	chrIV	102352	105433	+	CBG00349
274	WBGene00023752	6.63725	-0.125841	0.422673	-0.297726	0.765912	0.858718	chrIV	111806	115516	-	CBG00350
275	WBGene00023753	0.280746	-0.0614231	0.172259	-0.356574	0.721411	NA	chrIV	122484	123991	-	CBG00352
276	WBGene00023755	1.35551	-0.272298	0.351666	-0.774308	0.438749	NA	chrIV	127468	130678	-	Cbr-str-250
277	WBGene00023756	2311.11	-0.276356	0.078567	-3.51746	0.000435693	0.00240105	chrIV	132984	145287	-	CBG00355
278	WBGene00023757	35.7142	-1.29326	0.332654	-3.8877	0.000101198	0.000682313	chrIV	139351	140884	+	Cbr-col-138
279	WBGene00023759	1090.09	0.152364	0.112869	1.34992	0.177043	0.318935	chrIV	157476	159102	-	Cbr-flp-17
280	WBGene00023760	2248.01	-0.145381	0.089221	-1.62945	0.103218	0.212535	chrIV	162848	169147	-	Cbr-cnnm-1
281	WBGene00023761	117.461	0.194872	0.193952	1.00474	0.315023	0.482513	chrIV	176849	177883	+	CBG00361
282	WBGene00023762	101.796	-1.10622	0.310207	-3.56607	0.000362368	0.00204694	chrIV	177988	182182	-	Cbr-npr-32
284	WBGene00023763	113.503	-0.133565	0.2602	-0.513316	0.60773	0.744202	chrIV	199353	202441	+	CBG00364
285	WBGene00023764	3.19252	-0.429232	0.4145	-1.03554	0.300416	0.466585	chrIV	205335	208139	-	Cbr-mboa-4
286	WBGene00023765	4709.06	-0.038639	0.0850978	-0.454054	0.64979	0.774597	chrIV	208670	213168	+	CBG00366
287	WBGene00023767	24.2096	-0.0213271	0.33132	-0.0643703	0.948675	0.971648	chrIV	223921	228203	-	CBG00368
288	WBGene00023769	582.982	0.117167	0.176805	0.662692	0.507528	0.665432	chrIV	228246	229621	-	CBG00370
289	WBGene00023770	20.8395	2.41732	0.373949	6.46431	1.01763e-10	2.77212e-09	chrIV	233820	236245	-	CBG00373
290	WBGene00023771	1796.78	-0.215468	0.0881335	-2.4448	0.0144934	0.0454726	chrIV	236913	240190	+	CBG00374
292	WBGene00023772	170.084	0.12858	0.262914	0.489055	0.624803	0.756311	chrIV	240560	251141	+	Cbr-ifta-2
294	WBGene00023773	3391.69	0.233083	0.0682836	3.41346	0.000641446	0.00334785	chrIV	243688	251139	-	CBG00376
295	WBGene00023774	485.834	-0.225205	0.157857	-1.42664	0.153684	0.287073	chrIV	255093	258751	+	Cbr-slc-17.4
296	WBGene00023775	233.684	-0.182497	0.147568	-1.2367	0.216198	0.369338	chrIV	260655	264913	+	Cbr-zipt-7.1
298	WBGene00023776	1304.76	0.612874	0.167393	3.66129	0.000250947	0.00149507	chrIV	265044	268731	+	Cbr-nra-1
300	WBGene00023777	183.519	-0.859352	0.170154	-5.05045	4.40763e-07	5.68772e-06	chrIV	280781	290773	+	Cbr-npr-26
302	WBGene00023778	19.9245	-0.541754	0.395871	-1.36851	0.171152	0.310835	chrIV	290760	291612	-	Cbr-sod-5
303	WBGene00023779	0.218937	-0.0591805	0.17222	-0.343633	0.731122	NA	chrIV	292199	292438	+	CBG00384
306	WBGene00023781	0	NA	NA	NA	NA	NA	chrIV	295432	295761	+	CBG00386
309	WBGene00023782	1046.1	0.144307	0.113709	1.26909	0.204409	0.355223	chrIV	297857	300748	+	Cbr-pmp-4
310	WBGene00023783	417.048	0.0375864	0.117334	0.320336	0.748714	0.847141	chrIV	302465	304497	+	CBG00388
311	WBGene00023784	0.608751	0.130672	0.173305	0.753998	0.45085	NA	chrIV	308561	309733	-	CBG00389
312	WBGene00023785	5127.72	-0.164992	0.09243	-1.78505	0.0742531	0.165157	chrIV	318599	320959	-	CBG00392
313	WBGene00023786	79.3269	0.136993	0.284096	0.482207	0.629659	0.759735	chrIV	322355	323427	+	CBG00393
314	WBGene00023787	53.3256	-0.201216	0.249945	-0.805038	0.420798	0.587518	chrIV	323825	324807	-	Cbr-clec-197
315	WBGene00023788	55.7085	-0.394862	0.25419	-1.55341	0.120324	0.238977	chrIV	325220	327870	+	Cbr-clec-198
316	WBGene00023790	75.0731	-0.396923	0.21073	-1.88356	0.0596242	0.139647	chrIV	333221	338768	+	Cbr-clec-199
317	WBGene00023791	2.46101	-0.0316447	0.369774	-0.0855784	0.931802	0.961938	chrIV	339380	347102	+	CBG00399
318	WBGene00023792	20.0825	-0.435542	0.408679	-1.06573	0.286546	0.451556	chrIV	347722	349303	-	Cbr-zipt-17
319	WBGene00023793	373.85	-0.0609267	0.126177	-0.482868	0.62919	0.759462	chrIV	350307	352606	+	Cbr-trh-1
321	WBGene00023794	44.94	0.0731762	0.361901	0.2022	0.839761	0.906841	chrIV	353569	363309	+	CBG00402
322	WBGene00023795	371.798	-0.676082	0.122877	-5.5021	3.75292e-08	6.17913e-07	chrIV	363858	366464	+	Cbr-haf-1
323	WBGene00023796	625.619	0.0296496	0.0917711	0.323082	0.746633	0.845757	chrIV	366465	367210	-	CBG00404
324	WBGene00023797	2769.49	0.279635	0.0636571	4.39283	1.11882e-05	0.000100064	chrIV	367606	369225	+	Cbr-dlat-2
325	WBGene00023798	369.654	0.192414	0.114819	1.67581	0.0937752	0.197445	chrIV	369313	370062	+	CBG00406
326	WBGene00023799	58.1792	0.546313	0.272382	2.00568	0.0448899	0.111641	chrIV	370230	372665	+	CBG00407
328	WBGene00023800	929.615	0.293837	0.0937972	3.13268	0.00173218	0.007832	chrIV	372666	373558	-	CBG00408
329	WBGene00023801	64.721	-0.619078	0.244073	-2.53644	0.0111985	0.0370261	chrIV	376502	378990	+	CBG00409
330	WBGene00023802	1.73274	0.100009	0.371055	0.269526	0.787525	0.872027	chrIV	379757	380190	+	CBG00410
331	WBGene00023803	1.33223	0.115059	0.362184	0.31768	0.750728	NA	chrIV	381307	381939	-	CBG00412
332	WBGene00023804	8.79564	0.519643	0.418374	1.24205	0.214217	0.367074	chrIV	384617	386309	+	Cbr-lact-6
333	WBGene00023805	1186.9	0.157124	0.126278	1.24427	0.213401	0.366166	chrIV	386876	389512	+	Cbr-cogc-2
335	WBGene00023806	2329.45	-0.0393093	0.0673949	-0.583269	0.559712	0.707075	chrIV	389605	393144	+	Cbr-ufl-1
336	WBGene00023807	120.763	-0.282715	0.19377	-1.45903	0.144558	0.274454	chrIV	393398	393944	+	CBG00417
337	WBGene00023808	3717.59	0.171125	0.0710316	2.40914	0.0159902	0.0492533	chrIV	394521	398659	+	Cbr-itsn-1
338	WBGene00023809	2176.67	0.122693	0.0696251	1.76219	0.0780366	0.171499	chrIV	399918	401266	+	Cbr-uaf-2
339	WBGene00023810	1915.99	0.240267	0.0921124	2.60842	0.00909622	0.0313532	chrIV	401357	402557	+	Cbr-cyn-13
340	WBGene00023811	4590.93	0.233791	0.0649553	3.59926	0.000319126	0.00183363	chrIV	402668	405811	+	Cbr-sfa-1
341	WBGene00023812	683.892	-0.0338186	0.088766	-0.380986	0.703213	0.815202	chrIV	405898	407095	+	CBG00422
342	WBGene00023813	924.058	0.173152	0.0908392	1.90614	0.0566317	0.134131	chrIV	407035	408470	+	Cbr-bca-2
343	WBGene00023814	1630.11	0.17468	0.076422	2.28573	0.0222701	0.0641861	chrIV	408504	410671	+	CBG00425
344	WBGene00023815	32.2556	1.72934	0.346054	4.99732	5.81333e-07	7.22828e-06	chrIV	410603	411580	-	CBG00426
345	WBGene00023816	3462.83	0.500844	0.0850999	5.88537	3.9716e-09	7.91428e-08	chrIV	411643	412303	-	Cbr-snr-1
346	WBGene00023817	3003.96	-0.149086	0.105734	-1.41002	0.158534	0.293804	chrIV	412736	416256	+	Cbr-snx-13
347	WBGene00023818	546.396	0.0654998	0.11863	0.552137	0.580855	0.724068	chrIV	416818	418703	+	CBG00429
351	WBGene00023819	59.99	-0.0604254	0.307512	-0.196498	0.844221	0.909574	chrIV	419368	422236	+	Cbr-nas-6
352	WBGene00023820	125.926	0.0743611	0.186176	0.399413	0.689589	0.804463	chrIV	424869	427554	+	CBG00431
353	WBGene00023821	2.88997	0.720911	0.384736	1.87378	0.0609602	0.142101	chrIV	429153	430684	-	CBG00433
355	WBGene00023822	390.453	-0.344365	0.141849	-2.42769	0.0151954	0.0472635	chrIV	431784	434039	-	Cbr-gba-3
356	WBGene00023823	67.4341	-0.485229	0.287824	-1.68585	0.0918242	0.194543	chrIV	434976	435652	+	CBG00435
357	WBGene00023824	21690	-0.0901358	0.148116	-0.60855	0.542823	0.693263	chrIV	437964	439460	+	CBG00436
358	WBGene00023825	75.3539	-0.237937	0.219342	-1.08478	0.27802	0.442985	chrIV	439434	440563	+	CBG00437
359	WBGene00023826	12359.2	-0.667229	0.243325	-2.74213	0.0061043	0.0224267	chrIV	442014	443100	+	Cbr-elo-2
360	WBGene00023827	141.53	-0.390902	0.200664	-1.94804	0.0514099	0.124373	chrIV	443195	444125	+	CBG00439
362	WBGene00023828	160.168	-0.117989	0.176454	-0.668663	0.50371	0.66241	chrIV	445051	447574	+	CBG00440
384	WBGene00023829	15.9896	-1.06854	0.382211	-2.79567	0.00517917	0.0195689	chrIV	450939	452218	+	CBG00442
385	WBGene00023830	648.695	-0.0547408	0.101424	-0.539724	0.589388	0.730353	chrIV	452469	455941	+	CBG00443
387	WBGene00023831	286.184	-0.0610203	0.154598	-0.394702	0.693063	0.807598	chrIV	463088	470592	+	CBG00445
389	WBGene00023833	813.071	0.0607303	0.096689	0.628099	0.529939	0.683618	chrIV	473197	474820	+	CBG00447
390	WBGene00023834	122.861	-0.177507	0.238663	-0.743757	0.457024	0.621021	chrIV	476704	477789	-	CBG00448
391	WBGene00023835	14796.9	0.0155075	0.0558393	0.277716	0.781231	0.868822	chrIV	478383	484030	-	CBG00449
392	WBGene00023836	4.64365	1.02331	0.413937	2.47214	0.0134307	0.0428524	chrIV	486565	490314	-	Cbr-snf-9
393	WBGene00023837	5.8038	0.54919	0.427951	1.2833	0.199387	0.34863	chrIV	490753	492017	+	Cbr-str-187
394	WBGene00023838	10.8601	2.21312	0.426533	5.18862	2.11863e-07	2.94487e-06	chrIV	492024	492757	-	CBG00453
395	WBGene00023839	4458.89	0.283467	0.0850396	3.33335	0.000858065	0.00429537	chrIV	495924	498468	+	Cbr-atgp-1
396	WBGene00023840	63.9977	1.72269	0.350318	4.9175	8.76546e-07	1.04865e-05	chrIV	499723	500808	+	Cbr-lhfp-4
397	WBGene00023841	70.5799	1.6822	0.289621	5.80828	6.31175e-09	1.18738e-07	chrIV	500809	501556	+	Cbr-clec-196
398	WBGene00023842	117354	0.361405	0.110035	3.28446	0.00102179	0.00498966	chrIV	504017	506362	+	Cbr-hsp-1
399	WBGene00023843	4481.17	0.195685	0.0659591	2.96676	0.0030096	0.0124786	chrIV	506508	509277	+	Cbr-sucg-1
401	WBGene00023844	32.8701	0.997779	0.301094	3.31385	0.000920215	0.00455537	chrIV	511422	512237	+	CBG00459
402	WBGene00023845	3347.4	0.19482	0.0844985	2.3056	0.021133	0.0616389	chrIII	1624261	1667238	-	Cbr-pat-4
404	WBGene00023846	437.32	-0.42173	0.108428	-3.88948	0.000100457	0.000678539	chrIII	1669324	1670370	-	Cbr-spt-4
405	WBGene00023847	2148.24	-0.329705	0.0872731	-3.77785	0.000158188	0.00100269	chrIII	1670410	1675988	-	Cbr-attf-3
407	WBGene00023848	1752.24	0.102412	0.0688953	1.48649	0.13715	0.263675	chrIII	1676803	1678094	+	Cbr-mrpl-40
408	WBGene00023849	8806.45	0.105082	0.0655525	1.60303	0.108929	0.22127	chrIII	1678095	1681951	-	Cbr-pck-1
409	WBGene00023850	2.00896	0.418964	0.373815	1.12078	0.262382	0.424841	chrIII	1691408	1692523	-	CBG00468
410	WBGene00023851	45.5127	-0.389927	0.257844	-1.51226	0.130468	0.253904	chrIII	1693587	1696790	-	Cbr-cutl-25
411	WBGene00023852	2616.91	0.26761	0.0654943	4.08601	4.38851e-05	0.000330308	chrIII	1698801	1702318	-	CBG00470
413	WBGene00023853	230.709	-0.188215	0.187807	-1.00217	0.31626	0.483697	chrIII	1708476	1710638	+	CBG00471
414	WBGene00023854	1827.35	-0.20954	0.0792806	-2.64302	0.00821703	0.028805	chrIII	1714152	1719476	+	CBG00473
415	WBGene00023855	1212.79	-0.104534	0.128065	-0.81626	0.414352	0.581943	chrIII	1720858	1725467	-	CBG00474
416	WBGene00023856	212.274	-0.597249	0.152717	-3.91083	9.19802e-05	0.000633382	chrIII	1731496	1738106	+	CBG00476
417	WBGene00023857	628.555	0.29513	0.192234	1.53526	0.124719	0.245392	chrIII	1740874	1744820	+	CBG00477
418	WBGene00023858	994.862	-0.0599722	0.0969886	-0.618343	0.53635	0.688539	chrIII	1744811	1751901	-	CBG00478
419	WBGene00023859	2.45669	0.430834	0.361981	1.19021	0.233963	0.391124	chrIII	1757427	1758853	+	CBG00479
420	WBGene00023860	275.735	-0.622719	0.210132	-2.96346	0.003042	0.0125696	chrIII	1759184	1760894	+	Cbr-ckb-2.1
421	WBGene00023861	0.369999	0.0168705	0.173698	0.0971258	0.922626	NA	chrIII	1762361	1762829	-	CBG00481
425	WBGene00023862	1.97962	0.323942	0.382217	0.847536	0.396697	0.565369	chrIII	1764189	1765901	+	CBG00482
429	WBGene00023864	27.616	0.178916	0.348352	0.513607	0.607527	0.744002	chrIII	1766803	1774477	-	Cbr-clpr-2
437	WBGene00023865	248.097	0.223682	0.153821	1.45417	0.145899	0.27616	chrIII	1779492	1780892	-	Cbr-josd-1
438	WBGene00023866	1068.3	0.182144	0.0824934	2.20798	0.0272454	0.07531	chrIII	1781023	1781915	-	CBG00487
439	WBGene00023867	1448.62	0.124649	0.0677677	1.83936	0.065863	0.150607	chrIII	1783259	1786983	-	CBG00488
440	WBGene00023868	311.309	0.115805	0.120284	0.962762	0.335667	0.504605	chrIII	1782442	1783051	-	CBG00489
441	WBGene00023869	508.2	-0.169319	0.128854	-1.31404	0.188833	0.334672	chrIII	1787797	1791040	-	CBG00490
442	WBGene00023870	14699	0.0616494	0.0606792	1.01599	0.309635	0.476129	chrIII	1793522	1797800	+	Cbr-tufm-1
443	WBGene00023871	1568.96	0.143612	0.0770822	1.8631	0.0624475	0.144902	chrIII	1795876	1796328	-	CBG00492
444	WBGene00023874	1550.58	-0.11342	0.0865831	-1.30996	0.19021	0.336452	chrIII	1798507	1826086	+	Cbr-mrp-8
445	WBGene00023875	9.72375	0.371507	0.421903	0.88055	0.378562	0.548578	chrIII	1813322	1813956	-	CBG00496
449	WBGene00023876	10185.7	-0.00286304	0.082783	-0.0345849	0.972411	0.984575	chrIII	1827807	1848552	+	Cbr-ssl-1
450	WBGene00023878	777.319	0.386969	0.114581	3.37724	0.000732169	0.00375545	chrIII	1849170	1854694	-	CBG00499
451	WBGene00023879	325.211	0.715257	0.152568	4.68813	2.75719e-06	2.9007e-05	chrIII	1856380	1860493	-	Cbr-ceh-88.1
452	WBGene00023880	1640.14	-0.0569094	0.0856212	-0.664665	0.506265	0.66465	chrIII	1861241	1866689	+	Cbr-hut-1
453	WBGene00023881	14.1998	0.904099	0.398614	2.2681	0.0233229	0.0665652	chrIII	1867034	1874207	-	CBG00502
455	WBGene00023883	44.6424	0.0988701	0.278216	0.355372	0.722311	0.829083	chrII	3989130	3991325	+	CBG00505
456	WBGene00023884	16.7158	1.41229	0.369935	3.81767	0.000134718	0.000874338	chrII	3991958	3994878	+	CBG00506
457	WBGene00023885	0.608751	0.130672	0.173305	0.753998	0.45085	NA	chrII	3996599	3997145	+	CBG00508
458	WBGene00023886	36.8079	0.688769	0.325507	2.11599	0.0343457	0.0905878	chrII	3997719	3998568	+	CBG00509
459	WBGene00023887	4.96872	0.011463	0.42806	0.026779	0.978636	0.988045	chrII	3998656	3999596	-	CBG00510
460	WBGene00023888	2098.64	-0.0946192	0.0759779	-1.24535	0.213003	0.36568	chrII	4000171	4009138	-	Cbr-etc-1
462	WBGene00023889	2222.63	-0.170439	0.0957093	-1.7808	0.0749451	0.16638	chrII	4009587	4017061	-	Cbr-eif-2Bepsilon
464	WBGene00023890	739.554	-0.261675	0.0886098	-2.95312	0.0031458	0.0129346	chrII	4017681	4022768	+	Cbr-piga-1
465	WBGene00023891	95.0641	0.0107936	0.19507	0.0553321	0.955874	0.975236	chrII	4022830	4023455	-	Cbr-atg-10
466	WBGene00023892	4950.67	0.332885	0.145123	2.2938	0.0218017	0.0631569	chrII	4025824	4042170	-	Cbr-pyr-1
467	WBGene00023893	146.463	-0.213658	0.33987	-0.628648	0.52958	0.683431	chrII	4045583	4049835	-	CBG00516
468	WBGene00023894	30.5177	0.318816	0.363269	0.877632	0.380143	0.550147	chrII	4047335	4049499	+	CBG00517
469	WBGene00023895	22.2166	0.259594	0.391273	0.66346	0.507036	0.665196	chrII	4054930	4057478	-	CBG00518
471	WBGene00023896	0.37666	-0.0915829	0.174954	-0.523467	0.600649	NA	chrII	4060335	4060918	-	CBG00519
472	WBGene00023897	35.8985	-0.206556	0.312406	-0.661178	0.508498	0.666128	chrII	4063674	4067091	-	CBG00520
473	WBGene00023898	864.794	-0.0770686	0.0886912	-0.868954	0.384872	0.554762	chrII	4073818	4076454	+	Cbr-vab-9
474	WBGene00023899	2.42029	-0.0484946	0.39969	-0.12133	0.903429	0.945832	chrII	4077924	4078625	+	CBG00523
477	WBGene00023900	81.1332	-0.443763	0.209958	-2.11358	0.034551	0.0909755	chrII	4078692	4084376	-	CBG00524
478	WBGene00023901	1.04729	0.260529	0.3289	0.79212	0.428291	NA	chrII	4085383	4086908	-	CBG00525
483	WBGene00023902	0.964035	0.399812	0.279662	1.42962	0.152825	NA	chrII	4087817	4088420	-	CBG00526
484	WBGene00023903	0	NA	NA	NA	NA	NA	chrII	4088995	4089518	-	CBG00527
485	WBGene00023904	0.585574	0.170849	0.196282	0.870425	0.384068	NA	chrII	4091839	4092045	+	CBG00528
486	WBGene00023905	41.4627	-0.424598	0.304147	-1.39603	0.162705	0.299558	chrII	4093495	4100495	+	Cbr-cutl-12
487	WBGene00023906	369.288	-0.0854563	0.213673	-0.39994	0.689201	0.804237	chrII	4100973	4105102	-	CBG00530
488	WBGene00023907	126.516	0.10811	0.18982	0.569541	0.568989	0.714554	chrII	4107624	4109081	-	CBG00531
489	WBGene00023908	67.9668	-0.180797	0.331716	-0.545035	0.585729	0.72811	chrII	4109639	4113220	-	Cbr-sptf-2
490	WBGene00023909	0.171277	-0.0223768	0.172057	-0.130055	0.896523	NA	chrII	4117047	4117845	-	CBG00533
492	WBGene00023910	0.329	-0.0651024	0.172323	-0.377794	0.705584	NA	chrII	4118540	4122095	-	CBG00534
493	WBGene00023911	39.2673	-1.33311	0.330977	-4.0278	5.63003e-05	0.000409511	chrII	4126891	4131777	+	Cbr-chhy-1
495	WBGene00023912	3.87583	-0.22553	0.422977	-0.533196	0.593898	0.733447	chrII	4131995	4134641	-	CBG00536
496	WBGene00023913	8.60571	0.238216	0.41071	0.58001	0.561908	0.708749	chrII	4144364	4149130	+	CBG00537
497	WBGene00023914	0.806412	0.0939864	0.249847	0.376176	0.706786	NA	chrII	4142761	4142959	-	CBG00538
498	WBGene00023916	0.806412	0.0939864	0.249847	0.376176	0.706786	NA	chrII	4147043	4147241	-	CBG00540
499	WBGene00023918	1.5886	-0.35528	0.364322	-0.975181	0.329471	NA	chrII	4158805	4159585	-	CBG00542
500	WBGene00023919	2.11317	0.638936	0.356837	1.79055	0.0733649	0.163725	chrII	4165887	4167999	-	CBG00543
501	WBGene00023920	34.9093	0.719163	0.316534	2.272	0.0230868	0.0661129	chrII	4169746	4171887	-	CBG00544
503	WBGene00023921	816.366	-0.164491	0.0814299	-2.02003	0.0433804	0.108633	chrII	4171799	4173900	-	CBG00545
504	WBGene00023922	1905.5	-0.0836347	0.0729162	-1.147	0.251383	0.411483	chrII	4174868	4179634	-	Cbr-suf-1
505	WBGene00023923	58184.3	0.33536	0.0665191	5.04155	4.6177e-07	5.91805e-06	chrII	4179874	4180692	-	Cbr-rpl-26
507	WBGene00023924	1393.62	-0.161752	0.0865833	-1.86816	0.0617394	0.143578	chrII	4180924	4185277	+	Cbr-cpf-1
509	WBGene00023925	244.348	0.49095	0.175553	2.7966	0.00516438	0.0195209	chrII	4182874	4185277	-	CBG00549
510	WBGene00023926	268.346	-0.522982	0.138312	-3.78117	0.000156096	0.000992458	chrII	4187350	4193657	+	CBG00550
511	WBGene00023927	50.1554	0.197236	0.309355	0.637573	0.523752	0.678311	chrII	4193846	4196570	-	Cbr-aptf-4
513	WBGene00023928	0.382657	0.102037	0.175306	0.582054	0.56053	NA	chrII	4198169	4199404	-	CBG00553
514	WBGene00023929	0.470109	-0.0304384	0.224535	-0.135562	0.892167	NA	chrII	4199742	4201174	+	CBG00554
515	WBGene00023930	13.6711	-0.422591	0.400345	-1.05557	0.291166	0.456585	chrII	4205549	4207323	+	CBG00555
516	WBGene00023931	972.37	0.530691	0.200293	2.64957	0.00805943	0.0283373	chrII	4210365	4215812	+	CBG00556
517	WBGene00023932	700.621	-0.031611	0.104733	-0.301824	0.762786	0.856289	chrII	4213842	4215781	-	Cbr-arl-1
518	WBGene00023933	1177.61	-0.312797	0.107892	-2.89916	0.00374161	0.0149768	chrII	4216039	4222201	-	CBG00558
519	WBGene00023934	43.5902	-0.0201534	0.290625	-0.0693452	0.944715	0.969248	chrII	4222617	4227350	-	CBG00559
520	WBGene00023935	1511.6	0.0329791	0.0982315	0.335729	0.737075	0.839753	chrII	4227375	4229622	-	Cbr-bcs-1
521	WBGene00023936	131981	0.327079	0.0715107	4.57385	4.78854e-06	4.73225e-05	chrII	4229658	4230752	-	Cbr-rpl-5
522	WBGene00023937	83.3083	-0.267615	0.230367	-1.16169	0.245361	0.404695	chrII	4230837	4232689	+	Cbr-col-38
523	WBGene00023938	671.809	0.539621	0.252763	2.13489	0.0327701	0.0873295	chrII	4232995	4233588	+	CBG00563
524	WBGene00023939	862.305	-0.132005	0.0898903	-1.46851	0.141965	0.270792	chrII	4234048	4238289	+	Cbr-stc-1
525	WBGene00023940	21.9893	0.810482	0.347351	2.33332	0.0196312	0.0580356	chrII	4239043	4240247	-	CBG00565
526	WBGene00023941	56450.3	0.243351	0.0522846	4.65435	3.25006e-06	3.35702e-05	chrII	4242657	4244733	-	Cbr-iff-2
527	WBGene00023942	9.94996	-0.408135	0.418156	-0.976035	0.329047	0.497407	chrII	4245597	4256281	-	CBG00568
528	WBGene00023943	5.32308	-0.350546	0.420712	-0.833222	0.40472	0.572888	chrII	4256698	4256889	+	CBG00569
529	WBGene00023944	156.429	-0.270007	0.276482	-0.976582	0.328776	0.497142	chrII	4259914	4270479	+	Cbr-glb-27
531	WBGene00023945	2.7717	0.653152	0.384681	1.6979	0.0895259	0.190619	chrII	4271251	4272878	-	Cbr-decr-1.3
533	WBGene00023946	4.97254	1.54795	0.415398	3.72642	0.000194222	0.00120183	chrII	4273069	4274973	+	CBG00573
535	WBGene00023947	34.053	0.0181227	0.389205	0.0465632	0.962861	0.978741	chrII	4275450	4282348	-	Cbr-pqn-73
537	WBGene00023948	2.80025	-0.0494515	0.396359	-0.124764	0.90071	0.944164	chrII	4282079	4283210	+	CBG00575
538	WBGene00023949	643.745	-0.373256	0.180915	-2.06315	0.039098	0.100223	chrII	4288388	4291883	+	CBG00576
539	WBGene00023951	0.804511	0.124617	0.254319	0.490004	0.624131	NA	chrII	4298977	4302521	-	CBG00578
540	WBGene00023952	9.71336	-0.292507	0.419895	-0.696621	0.48604	0.646799	chrII	4303612	4305304	-	CBG00579
542	WBGene00023953	1.98702	0.19547	0.35671	0.547982	0.583704	0.726654	chrII	4305926	4307859	-	CBG00580
543	WBGene00023956	235.574	0.35281	0.209827	1.68143	0.0926797	0.195733	chrIII	14171619	14172440	+	CBG00583
544	WBGene00023957	572.781	-0.251918	0.102113	-2.46706	0.0136228	0.0433216	chrIII	14173039	14176357	+	CBG00584
545	WBGene00023958	3857.45	-0.0925093	0.0682363	-1.35572	0.175188	0.316416	chrIII	14176344	14179696	+	Cbr-hsp-75
546	WBGene00023959	631.394	-0.254684	0.132371	-1.92401	0.0543528	0.129908	chrIII	14180355	14181411	+	CBG00586
547	WBGene00023961	360.862	0.0218506	0.128994	0.169392	0.865488	0.921446	chrIII	14187736	14189405	-	Cbr-anmt-1
548	WBGene00023962	2672.72	0.0457355	0.0859025	0.532411	0.594441	0.733978	chrIII	14190812	14199059	+	Cbr-fli-1
551	WBGene00023963	337.894	-0.213762	0.122727	-1.74177	0.0815494	0.177282	chrIII	14199257	14202016	-	Cbr-svop-1
553	WBGene00023964	1482.81	-0.0704368	0.0702705	-1.00237	0.316167	0.483672	chrIII	14205389	14207730	+	CBG00591
554	WBGene00023965	369.986	0.507393	0.173749	2.92027	0.0034973	0.0141623	chrIII	14205883	14207215	-	CBG00592
558	WBGene00023966	2599.86	0.289259	0.0714442	4.04874	5.14933e-05	0.000379891	chrIII	14207714	14209957	+	Cbr-lnkn-1
559	WBGene00023967	38.7046	0.776274	0.280023	2.77218	0.00556829	0.0208	chrIII	14210264	14210778	+	CBG00594
560	WBGene00023968	3093.3	0.404347	0.0773568	5.22704	1.72241e-07	2.43202e-06	chrIII	14211002	14212413	+	Cbr-asna-1
561	WBGene00023969	527.139	-0.360731	0.150045	-2.40416	0.0162097	0.0497455	chrIII	14212418	14214896	+	CBG00596
562	WBGene00023970	334.714	0.165652	0.1472	1.12535	0.260439	0.422351	chrIII	14214889	14221827	-	Cbr-kap-1
564	WBGene00023971	6013.75	0.15797	0.0699631	2.25791	0.0239512	0.0679764	chrIII	14221827	14224461	-	Cbr-gsp-2
565	WBGene00023972	3359.23	1.02242	0.186155	5.4923	3.96737e-08	6.51504e-07	chrIII	14226071	14231347	+	CBG00600
566	WBGene00023973	71.1346	0.656986	0.232331	2.8278	0.00468688	0.0180287	chrIII	14231990	14233256	+	CBG00601
567	WBGene00023974	1.45732	0.396294	0.345288	1.14772	0.251084	NA	chrIII	14233255	14234084	-	Cbr-sgnh-1
568	WBGene00023975	412.665	0.0089072	0.142152	0.0626598	0.950037	0.97214	chrIII	14235051	14239257	-	CBG00604
569	WBGene00023976	3529.88	-0.060174	0.089031	-0.675876	0.499119	0.658499	chrIII	14245426	14247452	+	CBG00605
570	WBGene00023977	115.539	0.675206	0.231012	2.92281	0.00346884	0.0140775	chrIII	14247489	14249837	-	CBG00606
571	WBGene00023978	27.9355	-0.081697	0.402971	-0.202737	0.839341	0.90644	chrIII	14250602	14252164	+	CBG00607
572	WBGene00023979	8.35859	0.0591068	0.426796	0.13849	0.889853	0.937433	chrIII	14252470	14253006	+	Cbr-acbp-4.1
573	WBGene00023980	74.2631	-0.316352	0.251075	-1.25999	0.207674	0.359263	chrIII	14253133	14253562	-	CBG00609
574	WBGene00023983	189.978	-1.78277	0.238542	-7.4736	7.80313e-14	3.48113e-12	chrII	3959342	3961718	+	CBG00614
575	WBGene00023984	450.7	0.00916987	0.125429	0.073108	0.94172	0.967858	chrII	3934564	3936405	+	Cbr-gbh-2
576	WBGene00023985	1024.82	0.05057	0.0899737	0.562053	0.57408	0.718517	chrII	3931169	3931883	-	CBG00616
577	WBGene00023986	1942.66	0.121169	0.14276	0.848766	0.396012	0.56465	chrII	3928763	3931044	-	CBG00617
578	WBGene00023987	1732.49	2.74369	0.140957	19.4647	2.18687e-84	9.99399e-82	chrII	3925691	3928740	-	Cbr-lact-4
579	WBGene00023988	202.007	3.67187	0.378856	9.69198	3.26151e-22	3.19953e-20	chrII	3922741	3925125	+	CBG00619
580	WBGene00023989	6749.04	0.510462	0.150211	3.39831	0.000678044	0.00352121	chrII	3914391	3919746	-	Cbr-zyg-9
581	WBGene00023990	6719.5	0.262361	0.0594407	4.41382	1.01561e-05	9.18408e-05	chrII	3912218	3914318	-	Cbr-fars-3
582	WBGene00023991	1659.6	0.147406	0.0930267	1.58455	0.113068	0.227656	chrII	3910359	3912106	-	CBG00622
583	WBGene00023992	552.892	0.210483	0.152574	1.37955	0.167726	0.306185	chrII	3907606	3910245	-	CBG00623
584	WBGene00023993	1.81369	0.158617	0.311858	0.508618	0.61102	0.746679	chrII	3906847	3907655	+	CBG00624
585	WBGene00023994	60.0743	-1.09678	0.240758	-4.55552	5.2255e-06	5.12619e-05	chrII	3904659	3905871	+	CBG00625
586	WBGene00023995	5.73602	0.474037	0.404214	1.17274	0.2409	0.399199	chrII	3897351	3898391	+	CBG00626
587	WBGene00023996	26.0735	-0.147305	0.42282	-0.348387	0.72755	0.83285	chrII	3891528	3893158	-	Cbr-cut-3
588	WBGene00023997	0.405834	0.098241	0.172188	0.570544	0.568309	NA	chrII	3887894	3888983	-	CBG00629
589	WBGene00023998	5.49407	0.19588	0.422805	0.463288	0.643158	0.769503	chrII	3884959	3886976	-	CBG00630
590	WBGene00024000	252.947	-0.105189	0.130259	-0.807539	0.419356	0.586237	chrII	3875762	3876411	+	Cbr-evl-20.1
591	WBGene00024001	2923.59	0.275676	0.0681144	4.04725	5.18227e-05	0.000381833	chrII	3874545	3875530	+	Cbr-eif-3.G.1
592	WBGene00024002	840.041	-0.428697	0.198641	-2.15815	0.0309163	0.0834216	chrII	3868067	3872334	+	Cbr-lips-10
593	WBGene00024003	48.972	-1.87843	0.299489	-6.2721	3.56201e-10	8.64526e-09	chrII	3861607	3865130	-	Cbr-acp-3.1
595	WBGene00024004	17.3849	-1.06735	0.403115	-2.64776	0.00810264	0.0284732	chrII	3860811	3862089	+	CBG00639
596	WBGene00024005	206.747	-0.153535	0.158847	-0.966561	0.333764	0.50263	chrII	3856628	3858901	-	CBG00640
597	WBGene00024006	128.143	0.0235194	0.194068	0.121191	0.903539	0.945894	chrII	3851510	3853960	-	CBG00642
598	WBGene00024007	90.1368	0.349379	0.255102	1.36957	0.170822	0.310446	chrII	3845740	3848329	+	CBG00643
599	WBGene00024008	545.897	0.0199034	0.122857	0.162004	0.871303	0.92599	chrII	3836406	3843217	+	Cbr-drd-1
600	WBGene00024009	25.77	-0.47379	0.3672	-1.29028	0.196955	0.345413	chrII	3829691	3833973	+	CBG00645
601	WBGene00024010	31.3739	-0.938774	0.313417	-2.99528	0.00274191	0.011553	chrII	3821013	3824128	+	CBG00646
603	WBGene00024011	7.68813	-0.49952	0.422907	-1.18116	0.23754	0.395204	chrII	3817708	3819107	+	CBG00647
604	WBGene00024012	0.390215	-0.0930668	0.176302	-0.527884	0.59758	NA	chrII	3813625	3815001	+	Cbr-dod-23
605	WBGene00024013	8.12427	-0.407058	0.423349	-0.96152	0.336291	0.50534	chrII	3805831	3811658	+	Cbr-skpo-1
606	WBGene00024014	0	NA	NA	NA	NA	NA	chrII	3803080	3803939	+	CBG00650
607	WBGene00024015	0.202917	0.0587315	0.172057	0.34135	0.73284	NA	chrII	3801300	3802976	-	Cbr-ubc-24
608	WBGene00024016	4.55113	-0.346187	0.427277	-0.810215	0.417817	0.585012	chrII	3799687	3801287	+	CBG00652
609	WBGene00024017	1.91248	0.176986	0.381253	0.464222	0.642488	0.768926	chrII	3792117	3798360	-	CBG00653
610	WBGene00024018	2.27335	-0.0990938	0.385368	-0.257141	0.79707	0.878305	chrII	3787339	3788007	+	CBG00656
611	WBGene00024019	97.552	0.0224744	0.201388	0.111598	0.911142	0.949999	chrII	3785732	3787293	-	Cbr-nlp-5
612	WBGene00024020	1.88104	0.214811	0.391003	0.549384	0.582742	0.725841	chrII	3783367	3784770	-	CBG00658
614	WBGene00024021	459.148	-0.636927	0.234928	-2.71116	0.00670489	0.0242949	chrII	3776500	3778942	-	CBG00660
615	WBGene00024022	223.67	-0.252288	0.145735	-1.73114	0.083427	0.180463	chrII	3772005	3774279	+	Cbr-puf-5
616	WBGene00024023	284.306	-0.580113	0.143721	-4.03638	5.42824e-05	0.000396836	chrII	3768782	3770902	-	CBG00662
617	WBGene00024024	122.82	-0.146864	0.203941	-0.72013	0.471445	0.634269	chrII	3765303	3768319	-	CBG00663
618	WBGene00024025	296.994	-0.374119	0.169042	-2.21317	0.0268861	0.0745443	chrII	3763519	3765319	+	CBG00664
619	WBGene00024026	4938.06	-0.537232	0.359923	-1.49263	0.135534	0.261224	chrII	3750576	3755183	-	CBG00666
620	WBGene00024027	23.7489	-0.130896	0.326009	-0.401509	0.688046	0.803676	chrII	3746605	3750575	+	CBG00667
621	WBGene00024028	2843.8	-0.18911	0.0849387	-2.22643	0.0259855	0.0726485	chrII	3741920	3745452	-	Cbr-tdc-1
622	WBGene00024029	150.142	0.0658191	0.163283	0.4031	0.686875	0.802768	chrII	3739783	3742068	+	Cbr-gei-14
624	WBGene00024030	362.713	-0.434853	0.194672	-2.23378	0.0254978	0.0715092	chrII	3738314	3739502	-	Cbr-slc-25A32
625	WBGene00024031	1588.26	0.190483	0.0710775	2.67994	0.00736354	0.0262801	chrII	3737379	3738313	+	Cbr-mrpl-10
626	WBGene00024032	115.903	0.797326	0.20121	3.96266	7.41208e-05	0.000521714	chrII	3734637	3737169	-	Cbr-clec-142
627	WBGene00024033	14051.1	0.498187	0.0738633	6.74471	1.53334e-11	4.86952e-10	chrII	3732745	3734609	+	Cbr-nst-1
628	WBGene00024034	9029.99	-0.0377964	0.0651227	-0.580387	0.561654	0.708579	chrII	3730064	3732140	-	Cbr-cct-4
629	WBGene00024035	316.881	-0.355796	0.171171	-2.0786	0.0376542	0.0973274	chrII	3727798	3730051	+	Cbr-acp-2
630	WBGene00024036	5.72089	0.367288	0.403766	0.909656	0.363004	0.532373	chrII	3712840	3715300	+	CBG00679
631	WBGene00024037	459.632	-0.245666	0.135181	-1.81731	0.0691703	0.156578	chrII	3703408	3709782	-	Cbr-efl-3
632	WBGene00024038	3.88081	0.598383	0.415622	1.43973	0.149945	0.281938	chrII	3700009	3702601	+	Cbr-sra-13
633	WBGene00024039	6623.39	-0.48297	0.0848936	-5.68912	1.27694e-08	2.28738e-07	chrII	3684562	3691300	+	CBG00683
635	WBGene00024040	118.853	-0.485749	0.209446	-2.3192	0.0203841	0.0598396	chrII	3677984	3679106	+	Cbr-nlp-55
636	WBGene00024041	1005.3	-0.367579	0.0999515	-3.67757	0.000235467	0.00141499	chrII	3627767	3662475	+	Cbr-shw-1
643	WBGene00024042	10.012	-0.129394	0.426657	-0.303275	0.76168	0.855407	chrII	3642481	3645804	-	CBG00687
644	WBGene00024043	33.3461	-0.280951	0.367475	-0.764544	0.444543	0.610149	chrII	3637845	3641465	-	CBG00688
645	WBGene00024044	4705.09	0.149576	0.0737577	2.02794	0.0425663	0.10707	chrII	3624410	3626681	+	Cbr-ran-3
646	WBGene00024045	471.962	0.122388	0.128895	0.949519	0.342357	0.511314	chrII	3620156	3624367	-	CBG00693
647	WBGene00024046	11455.4	-0.0360752	0.0633799	-0.56919	0.569227	0.714662	chrII	3620940	3622999	+	Cbr-hel-1
648	WBGene00024048	0.806412	0.0939864	0.249847	0.376176	0.706786	NA	chrII	3608498	3609682	+	CBG00697
649	WBGene00024049	7.95955	0.439168	0.428005	1.02608	0.304853	0.471524	chrII	3606413	3607864	+	CBG00698
650	WBGene00024050	0.342555	-0.0651024	0.172323	-0.377794	0.705584	NA	chrII	3595533	3596006	-	CBG00699
651	WBGene00024051	1373.05	-0.259989	0.10262	-2.5335	0.011293	0.0372531	chrII	3589317	3593840	-	Cbr-eff-1
653	WBGene00024052	1142.31	-0.574065	0.165102	-3.47703	0.000506996	0.00273606	chrII	3580500	3589332	+	CBG00701
654	WBGene00024053	945.701	0.745278	0.420396	1.7728	0.0762622	0.168625	chrII	3573242	3574583	+	Cbr-col-77
656	WBGene00024054	8.20011	0.196628	0.424441	0.463263	0.643176	0.769503	chrII	3567059	3571143	-	CBG00704
657	WBGene00024055	272.064	-0.627741	0.186484	-3.3662	0.000762122	0.00387935	chrII	3559159	3567053	+	Cbr-amt-3
658	WBGene00024056	1055.42	0.501749	0.103588	4.8437	1.27441e-06	1.45957e-05	chrII	3539886	3543844	+	Cbr-dab-1
659	WBGene00024057	17750.8	-0.197018	0.0952233	-2.06902	0.0385446	0.0991095	chrII	3528835	3532733	+	Cbr-ifg-1
660	WBGene00024058	522.84	-0.0106094	0.0957827	-0.110765	0.911802	0.950281	chrII	3527047	3527978	-	CBG00710
661	WBGene00024059	415.36	-0.217243	0.112758	-1.92663	0.0540258	0.129299	chrII	3523989	3526492	+	CBG00712
662	WBGene00024060	46.5733	-0.531694	0.259678	-2.04751	0.0406078	0.103225	chrII	3519489	3521802	-	Cbr-twk-3
663	WBGene00024061	8.17235	-0.65501	0.422729	-1.54948	0.121267	0.240468	chrII	3514220	3516606	-	CBG00714
664	WBGene00024063	443.471	-0.433422	0.145479	-2.97929	0.00288921	0.0120676	chrII	3507664	3513315	+	Cbr-col-76
665	WBGene00024064	1543.69	-0.706852	0.384927	-1.83633	0.0663093	0.151369	chrII	3499510	3505204	+	Cbr-qua-1
666	WBGene00024065	9.1093	0.532533	0.426614	1.24828	0.211929	0.364203	chrII	3487267	3489874	-	CBG00719
667	WBGene00024066	261.53	1.29532	0.183703	7.05117	1.77423e-12	6.4177e-11	chrII	3481095	3484567	-	CBG00720
668	WBGene00024067	13641.9	0.0349948	0.0576952	0.606546	0.544152	0.693921	chrII	3478978	3481094	+	Cbr-cct-1
669	WBGene00024068	1134.53	0.140209	0.157634	0.889455	0.373758	0.544142	chrII	3476197	3478550	-	Cbr-mig-5
671	WBGene00024069	55.7417	1.16288	0.291508	3.98918	6.63015e-05	0.000473434	chrII	3475413	3476196	+	Cbr-dylt-3
672	WBGene00024070	12.8562	-0.0137118	0.388554	-0.0352892	0.971849	0.984407	chrII	3464978	3469245	-	CBG00724
674	WBGene00024071	15.1216	0.308555	0.397036	0.777145	0.437073	0.602563	chrII	3462596	3464961	-	Cbr-scl-17
675	WBGene00024072	118.323	-0.275823	0.177095	-1.55749	0.119354	0.237378	chrII	3458037	3461807	-	Cbr-acr-14
676	WBGene00024073	121.015	-0.316207	0.185349	-1.70602	0.0880053	0.188001	chrII	3437706	3452164	-	CBG00729
679	WBGene00024074	802.603	-0.595015	0.118636	-5.01545	5.29086e-07	6.66676e-06	chrII	3431767	3437541	+	Cbr-rrf-3
680	WBGene00024075	1183.68	-0.631718	0.101133	-6.24643	4.19931e-10	1.00105e-08	chrII	3429247	3431535	-	Cbr-emb-27
681	WBGene00024076	193.72	-0.0957361	0.151501	-0.631919	0.52744	0.681466	chrII	3427724	3429235	+	Cbr-pch-2
683	WBGene00024077	1121.1	-0.373371	0.131593	-2.83732	0.00454941	0.0175757	chrII	3422058	3427647	+	Cbr-ltd-1
684	WBGene00024078	1363.42	-0.00984976	0.0861336	-0.114354	0.908957	0.948964	chrII	3400826	3403138	+	Cbr-sfxn-5
685	WBGene00024079	1142.24	-0.0122007	0.118903	-0.10261	0.918272	0.954174	chrII	3391984	3395492	-	CBG00736
686	WBGene00024080	67.1331	0.688981	0.234729	2.93522	0.0033331	0.0136037	chrII	3389829	3391597	+	CBG00737
688	WBGene00024081	5606.87	-0.140255	0.0767726	-1.82689	0.0677164	0.154149	chrII	3383281	3388996	+	CBG00738
689	WBGene00024082	87.6389	0.176724	0.226892	0.778889	0.436045	0.601728	chrII	3382068	3382915	-	CBG00739
690	WBGene00024083	16.4083	1.16232	0.382799	3.03636	0.00239452	0.010288	chrII	3380758	3381536	+	Cbr-tmem-138
691	WBGene00024084	250.494	0.197067	0.145237	1.35687	0.174824	0.316053	chrII	3372880	3378027	-	Cbr-tub-1
692	WBGene00024085	0	NA	NA	NA	NA	NA	chrII	3360789	3365145	-	CBG00742
693	WBGene00024086	796.764	0.0218125	0.0877419	0.248599	0.803671	0.882606	chrII	3358423	3365145	+	CBG00743
694	WBGene00024087	108738	0.43562	0.0578197	7.53411	4.91693e-14	2.2636e-12	chrII	3357533	3358321	+	Cbr-rpl-10
696	WBGene00024088	1625.76	0.110366	0.086494	1.276	0.201956	0.351842	chrII	3354726	3357553	-	CBG00745
697	WBGene00024089	13510.6	0.595091	0.093677	6.35259	2.11724e-10	5.40473e-09	chrII	3351957	3354544	+	Cbr-cdc-48.2
698	WBGene00024090	991.374	0.722685	0.0782535	9.23517	2.57876e-20	2.22665e-18	chrII	3348642	3350520	-	Cbr-ctns-1
701	WBGene00024091	3666.55	-0.497494	0.143274	-3.47232	0.000515981	0.00277257	chrII	3344354	3348635	+	Cbr-ulp-4
703	WBGene00024093	1514.79	-0.615133	0.200493	-3.0681	0.00215424	0.00942349	chrII	3323746	3333440	+	Cbr-unc-105
704	WBGene00024094	1.12512	0.012173	0.333707	0.0364781	0.970901	NA	chrV	1355592	1356225	+	CBG00753
708	WBGene00024095	1.18266	-0.164504	0.330297	-0.498048	0.61845	NA	chrV	1356403	1357040	+	CBG00754
712	WBGene00024096	0.17974	0.0587315	0.172057	0.34135	0.73284	NA	chrV	1357653	1358091	+	CBG00755
716	WBGene00024097	1.1598	0.295986	0.314702	0.940527	0.346947	NA	chrV	1358585	1359152	+	CBG00756
720	WBGene00024098	221.129	-1.06331	0.196619	-5.40797	6.37414e-08	9.93612e-07	chrV	1366501	1367436	+	CBG00757
721	WBGene00024099	101.248	0.0454026	0.194036	0.23399	0.814992	0.890098	chrV	1368104	1369227	+	CBG00758
723	WBGene00024100	5709.54	-0.321764	0.0819442	-3.92663	8.61455e-05	0.000598705	chrV	1371493	1384385	+	Cbr-rpm-1
724	WBGene00024102	1152.54	-0.427831	0.101309	-4.22302	2.41051e-05	0.000196372	chrV	1390709	1402557	+	CBG00761
725	WBGene00024103	2114.76	-0.515131	0.194249	-2.65191	0.00800367	0.0281836	chrV	1402348	1409979	-	Cbr-sup-37
727	WBGene00024104	52.4514	1.39432	0.274781	5.07428	3.88957e-07	5.07161e-06	chrV	1421170	1423890	-	CBG00767
729	WBGene00024105	980.879	0.208587	0.0921726	2.263	0.0236354	0.0672831	chrV	1423991	1426133	-	CBG00768
730	WBGene00024106	3.24665	1.0643	0.39821	2.67272	0.00752399	0.0267559	chrV	1426737	1427952	-	CBG00769
731	WBGene00024107	0.202917	0.0587315	0.172057	0.34135	0.73284	NA	chrV	1429957	1430789	+	CBG00770
735	WBGene00024108	0.17974	0.0587315	0.172057	0.34135	0.73284	NA	chrV	1431898	1432730	+	CBG00771
739	WBGene00024109	2.5043	0.0974039	0.374434	0.260136	0.794759	0.876988	chrV	1432779	1433768	-	CBG00772
743	WBGene00024110	0.788491	0.210321	0.21418	0.981979	0.32611	NA	chrV	1433905	1434670	-	CBG00773
747	WBGene00024111	2.52423	0.938157	0.373842	2.5095	0.0120902	0.0394385	chrV	1434822	1435638	-	CBG00774
751	WBGene00024112	779.531	0.41735	0.114494	3.64517	0.000267213	0.00157079	chrV	1436336	1437338	+	CBG00775
771	WBGene00024113	5.5751	1.58293	0.41624	3.80293	0.000142995	0.000921039	chrV	1439426	1440018	+	CBG00777
772	WBGene00024114	171.624	0.0698125	0.14981	0.466008	0.64121	0.768131	chrV	1441610	1445121	+	CBG00778
773	WBGene00024115	79.1385	-0.0542939	0.257783	-0.210619	0.833185	0.902131	chrV	1447492	1448606	+	CBG00779
777	WBGene00024116	3.97416	0.747729	0.422728	1.76882	0.0769242	0.169789	chrV	1453216	1455634	-	Cbr-irld-44
781	WBGene00024117	802.993	0.0471843	0.121842	0.387257	0.698566	0.81171	chrV	1456334	1457209	+	CBG00781
782	WBGene00024119	2.05482	0.0782172	0.375472	0.208317	0.834982	0.903313	chrV	1463730	1464591	+	CBG00785
783	WBGene00024120	0	NA	NA	NA	NA	NA	chrV	1467876	1468604	-	CBG00786
786	WBGene00024121	1.11566	0.29632	0.277966	1.06603	0.286411	NA	chrV	1469070	1470538	-	CBG00787
787	WBGene00024122	15.7232	-0.200473	0.424847	-0.471873	0.637018	0.765294	chrV	1474627	1475646	-	CBG00789
788	WBGene00024123	18.0793	0.18465	0.390407	0.472967	0.636237	0.764815	chrV	1476354	1477242	-	CBG00790
789	WBGene00024124	4.06704	0.446726	0.426931	1.04636	0.295393	0.460949	chrV	1478812	1480743	-	CBG00792
790	WBGene00024125	203.476	-0.557861	0.252607	-2.20842	0.0272153	0.0752569	chrV	1480875	1481641	-	CBG00793
791	WBGene00024126	16.0158	0.504763	0.369665	1.36546	0.172108	0.312298	chrV	1482526	1483394	+	CBG00794
792	WBGene00024127	96.2764	-0.00201189	0.21444	-0.00938207	0.992514	0.996183	chrV	1484669	1485605	-	CBG00795
793	WBGene00024128	2.75675	0.592412	0.402988	1.47005	0.141548	0.270245	chrV	1486251	1488342	+	CBG00796
801	WBGene00024129	0.337463	0.0165707	0.172256	0.096198	0.923363	NA	chrV	1488742	1490158	-	Cbr-srx-62
802	WBGene00024130	227.202	-0.234555	0.290276	-0.808041	0.419067	0.586237	chrV	1490875	1495816	-	Cbr-lmd-4
804	WBGene00024131	1.2216	0.321784	0.338308	0.951159	0.341524	NA	chrV	1500654	1502314	-	CBG00799
805	WBGene00024132	18.49	-0.06917	0.380364	-0.181852	0.855699	0.915473	chrV	1502675	1504742	-	CBG00800
806	WBGene00024133	7.72681	-0.924487	0.426741	-2.16639	0.0302815	0.0820039	chrV	1504872	1506703	-	CBG00801
807	WBGene00024134	10.2262	0.133636	0.407395	0.328025	0.742893	0.843402	chrV	1507615	1509092	-	CBG00802
808	WBGene00024135	5.14777	0.89803	0.428016	2.09812	0.0358944	0.0936313	chrV	1510580	1512074	-	CBG00803
809	WBGene00024136	6.25721	-0.356762	0.427907	-0.833737	0.404429	0.572643	chrV	1512413	1513648	-	Cbr-srh-229
810	WBGene00024137	0.511107	0.110603	0.22604	0.489309	0.624623	NA	chrV	1514608	1515500	-	CBG00805
811	WBGene00024138	93.0801	1.57737	0.294064	5.36404	8.13812e-08	1.23971e-06	chrV	1516235	1520527	+	Cbr-nhr-171
813	WBGene00024139	21.3292	1.02306	0.426691	2.39766	0.0165002	0.0505087	chrV	1521929	1523641	+	Cbr-srb-18
815	WBGene00024140	0.604555	0.174262	0.197507	0.882309	0.37761	NA	chrV	1524283	1524642	+	CBG00808
816	WBGene00024141	6.34941	-0.318072	0.427548	-0.743944	0.456911	0.621002	chrV	1525189	1528082	-	Cbr-srb-19
817	WBGene00024142	0	NA	NA	NA	NA	NA	chrV	1529851	1530245	+	CBG00810
819	WBGene00024143	0	NA	NA	NA	NA	NA	chrV	1534209	1534553	+	CBG00812
821	WBGene00024144	3.54067	0.293298	0.406249	0.721966	0.470316	0.632977	chrV	1535590	1537390	+	CBG00813
824	WBGene00024145	0.960764	-0.249923	0.297814	-0.839192	0.401361	NA	chrV	1540818	1543060	+	CBG00814
825	WBGene00024146	35.155	-0.645389	0.332383	-1.9417	0.0521729	0.125748	chrV	1543300	1546981	-	CBG00815
826	WBGene00024148	3.68735	0.485173	0.423273	1.14624	0.251695	0.41195	chrV	1550588	1552282	-	CBG00818
827	WBGene00024149	614.536	0.294293	0.0980468	3.00155	0.00268605	0.0113429	chrV	1552456	1554195	-	CBG00819
828	WBGene00024150	723.688	0.00848507	0.102026	0.0831661	0.933719	0.963122	chrV	1555191	1556370	+	CBG00820
830	WBGene00024151	619.705	-0.615272	0.164552	-3.73906	0.000184706	0.00115016	chrV	1556371	1562841	-	CBG00821
832	WBGene00024152	87.0565	0.264854	0.287436	0.921436	0.356823	0.526564	chrV	1558518	1562841	+	CBG00822
833	WBGene00024154	284.439	0.488469	0.260523	1.87495	0.0607991	0.141797	chrV	1565365	1567520	+	Cbr-srh-268
834	WBGene00024155	743.732	-0.345492	0.210226	-1.64343	0.100294	0.207761	chrV	1569194	1573487	-	Cbr-nhx-3
836	WBGene00024156	887.479	0.24635	0.396854	0.620758	0.534759	0.687263	chrV	1575452	1576317	-	Cbr-ftn-1
837	WBGene00024157	84.5876	0.133076	0.253988	0.523945	0.600316	0.738353	chrV	1576757	1579823	-	CBG00827
838	WBGene00024158	26.1374	-0.213948	0.334498	-0.639611	0.522426	0.677512	chrV	1579627	1580364	-	CBG00828
839	WBGene00024159	1.6654	0.483361	0.361591	1.33676	0.1813	0.324514	chrV	1580990	1581886	-	Cbr-ttr-10
840	WBGene00024160	10.7968	0.499551	0.428026	1.1671	0.243169	0.40207	chrV	1582362	1582893	+	CBG00830
841	WBGene00024161	0.486129	-0.128096	0.187398	-0.683547	0.494261	NA	chrV	1585488	1587069	-	CBG00831
842	WBGene00024162	0.35948	0.098241	0.172188	0.570544	0.568309	NA	chrV	1589159	1589762	-	CBG00832
843	WBGene00024163	60.9031	-0.946743	0.255372	-3.70731	0.000209471	0.00128012	chrV	1591761	1597723	-	CBG00833
844	WBGene00024164	0.663403	0.0518615	0.272283	0.190469	0.848942	NA	chrV	1597898	1599778	+	CBG00834
845	WBGene00024165	4.74373	0.166228	0.410677	0.404766	0.685649	0.802136	chrV	1604269	1605784	+	CBG00835
847	WBGene00024166	0.109469	-0.0223768	0.172057	-0.130055	0.896523	NA	chrV	1607576	1607984	+	CBG00836
849	WBGene00024167	286.974	-0.301399	0.173257	-1.73961	0.081928	0.17796	chrV	1609026	1610342	+	CBG00837
850	WBGene00024168	2.53568	0.22304	0.388759	0.573722	0.566156	0.711903	chrV	1610450	1611869	-	CBG00838
851	WBGene00024169	4.48653	0.0948258	0.409263	0.231699	0.816772	0.891054	chrV	1612694	1614060	-	CBG00839
852	WBGene00024170	7.45553	0.788845	0.423245	1.8638	0.0623495	0.14471	chrV	1614571	1615468	-	CBG00840
853	WBGene00024172	9.51419	0.286592	0.407175	0.703854	0.481523	0.643302	chrII	1234090	1236734	-	CBG00842
854	WBGene00024173	0.781335	0.120034	0.253445	0.473608	0.635779	NA	chrII	1229191	1233935	-	Cbr-srd-1
856	WBGene00024174	0.198721	0.0587315	0.172057	0.34135	0.73284	NA	chrII	1228399	1228630	+	CBG00844
857	WBGene00024175	0	NA	NA	NA	NA	NA	chrII	1221513	1223697	-	CBG00845
858	WBGene00024176	0.527127	-0.0387913	0.188901	-0.205352	0.837297	NA	chrII	1219223	1220306	-	CBG00846
860	WBGene00024177	1.05845	-0.0779847	0.25898	-0.301123	0.763321	NA	chrII	1128734	1136637	+	CBG00847
861	WBGene00024178	0	NA	NA	NA	NA	NA	chrII	1123764	1127435	+	Cbr-sfxn-1.2
862	WBGene00024179	17.8641	0.273153	0.36665	0.744996	0.456274	0.620283	chrII	1172635	1182100	-	Cbr-gcy-5
863	WBGene00024180	48.4754	-0.202966	0.254545	-0.79737	0.425236	0.591922	chrII	1162081	1172037	-	Cbr-gcy-4
865	WBGene00024181	5061.59	0.0811854	0.0771103	1.05285	0.292411	0.457872	chrII	1158920	1161148	-	Cbr-vha-9
866	WBGene00024182	914.001	0.0786656	0.0928141	0.847561	0.396683	0.565369	chrII	1155807	1158769	-	Cbr-clpp-1
867	WBGene00024183	346.431	0.131051	0.117803	1.11246	0.26594	0.429044	chrII	1156544	1157536	+	Cbr-mdt-22
868	WBGene00024184	29.3857	0.650299	0.334155	1.9461	0.0516431	0.12476	chrII	1154699	1155320	+	CBG00855
869	WBGene00024185	0	NA	NA	NA	NA	NA	chrII	1139026	1139485	-	CBG00856
870	WBGene00024186	0.553935	0.0936242	0.23155	0.404338	0.685965	NA	chrII	1136862	1137819	-	CBG00857
872	WBGene00024187	8.77466	-0.970086	0.417318	-2.32457	0.0200948	0.0591171	chrII	1114174	1116359	+	Cbr-nlp-63
873	WBGene00024188	66.8166	0.204747	0.224764	0.910945	0.362325	0.531684	chrII	1097712	1110341	+	Cbr-pax-3
875	WBGene00024189	38.2727	-0.221769	0.285962	-0.77552	0.438032	0.603442	chrII	1087191	1091455	-	CBG00862
876	WBGene00024190	1906.99	0.227792	0.072335	3.14913	0.00163755	0.00747451	chrII	1082724	1087121	+	Cbr-asah-2
877	WBGene00024191	97.6427	-0.298406	0.27388	-1.08955	0.275912	0.440767	chrII	1076848	1080441	+	Cbr-phg-1
878	WBGene00024194	6.55007	-0.00310327	0.424077	-0.00731771	0.994161	0.996928	chrII	1064084	1064494	-	CBG00867
879	WBGene00024195	1502.67	-0.275911	0.102156	-2.70087	0.00691583	0.0249244	chrII	1019168	1055209	+	Cbr-mel-11
881	WBGene00024196	389.039	-0.127223	0.151938	-0.837335	0.402404	0.571064	chrII	1007118	1010245	+	Cbr-cup-15
882	WBGene00024197	4228.9	0.125781	0.0653	1.9262	0.0540793	0.129394	chrII	1003771	1006918	-	Cbr-sdhb-1
883	WBGene00024198	3438.69	-0.0748758	0.125821	-0.595098	0.551778	0.70031	chrII	995015	1003695	+	CBG00873
884	WBGene00024199	200.794	0.934557	0.186254	5.01764	5.23103e-07	6.60916e-06	chrII	984178	987978	+	CBG00875
886	WBGene00024201	3607.3	-0.118567	0.19849	-0.597342	0.550279	0.699117	chrII	940896	949009	-	Cbr-mtrr-1
887	WBGene00024202	939.838	-0.154354	0.0878295	-1.75743	0.0788441	0.172925	chrII	935502	939926	-	Cbr-acs-7
888	WBGene00024203	10.7452	0.885632	0.42409	2.08831	0.0367698	0.0954893	chrII	930346	939924	+	CBG00884
889	WBGene00024204	1251.48	-0.0193687	0.0984123	-0.196812	0.843975	0.909428	chrII	902625	927498	+	Cbr-daf-19
892	WBGene00024205	893.592	0.1097	0.0861442	1.27344	0.202861	0.35309	chrII	898988	901735	-	CBG00888
893	WBGene00024206	1070.91	-0.187556	0.0773546	-2.42462	0.0153242	0.0475933	chrII	893385	897401	-	CBG00889
894	WBGene00024207	14.2486	2.27858	0.425982	5.349	8.84418e-08	1.3289e-06	chrII	889123	892482	-	Cbr-cdc-25.4
895	WBGene00024208	830.038	-0.0667717	0.0918454	-0.727	0.467226	0.63004	chrII	886915	888449	+	CBG00891
896	WBGene00024209	26.2826	0.470836	0.352088	1.33727	0.181135	0.324387	chrII	882280	886543	+	Cbr-srb-6
897	WBGene00024210	13.3558	0.206137	0.384567	0.536025	0.591941	0.732189	chrII	877222	879078	+	CBG00894
899	WBGene00024211	1.73051	0.539373	0.343017	1.57244	0.115849	0.231992	chrII	864946	869311	-	CBG00895
900	WBGene00024212	121.183	-0.451353	0.218644	-2.06433	0.0389863	0.099957	chrII	861065	864476	+	Cbr-ref-1
901	WBGene00024213	749.132	-0.489428	0.1163	-4.20833	2.57269e-05	0.000208227	chrII	842544	847124	+	CBG00897
902	WBGene00024214	47.124	-0.146482	0.292186	-0.501332	0.616137	0.750375	chrII	836950	841570	-	CBG00898
903	WBGene00024215	141.386	-0.119765	0.197297	-0.607029	0.543832	0.693645	chrII	832444	834472	-	CBG00899
904	WBGene00024216	0.971593	0.0917962	0.322961	0.284233	0.776232	NA	chrII	832880	833675	+	CBG00900
905	WBGene00024217	31.6094	1.14154	0.309412	3.68939	0.000224797	0.00136047	chrII	824993	831050	+	CBG00901
906	WBGene00024219	1037.34	0.0741897	0.117164	0.633212	0.526595	0.680845	chrII	811022	816387	+	CBG00904
907	WBGene00024220	72.1897	0.390021	0.379361	1.0281	0.303903	0.470598	chrII	804406	807182	+	Cbr-abu-14
908	WBGene00024221	2801.25	-0.0766258	0.0814077	-0.94126	0.346571	0.515619	chrII	779580	796706	+	CBG00906
909	WBGene00024222	300.34	-1.09429	0.128485	-8.51687	1.63925e-17	1.12097e-15	chrII	773928	778756	+	CBG00907
911	WBGene00024223	1490.59	-0.814788	0.168562	-4.83375	1.33987e-06	1.52615e-05	chrII	750486	766432	+	Cbr-sym-2
912	WBGene00024224	102.768	-0.303385	0.198928	-1.5251	0.127234	0.249215	chrII	737530	750544	+	Cbr-twk-4
913	WBGene00024225	1014.66	0.105013	0.101751	1.03206	0.302044	0.468377	chrII	716378	731734	-	Cbr-let-23
915	WBGene00024226	178.075	0.998388	0.222054	4.49616	6.91923e-06	6.55437e-05	chrII	704905	714866	+	CBG00912
916	WBGene00024227	11.2298	0.797649	0.407558	1.95714	0.0503307	0.122235	chrII	704011	704665	-	CBG00914
917	WBGene00024228	830.042	-0.149637	0.101404	-1.47565	0.140038	0.267908	chrII	690371	703929	+	CBG00915
920	WBGene00024229	8.50316	-0.143862	0.413941	-0.347543	0.728184	0.833325	chrII	688220	690582	+	CBG00917
921	WBGene00024230	1185.75	0.136236	0.0932002	1.46176	0.143808	0.273417	chrII	685897	687586	-	Cbr-gst-13
922	WBGene00024231	203.946	3.39729	0.201769	16.8375	1.29521e-63	4.25762e-61	chrII	683473	685896	+	CBG00919
923	WBGene00024232	7791.6	0.0111671	0.0729707	0.153036	0.87837	0.930568	chrII	673982	679949	+	Cbr-aqp-2
926	WBGene00024233	20.51	-1.05204	0.413612	-2.54354	0.0109737	0.0364316	chrII	654372	656636	-	Cbr-nlp-82
927	WBGene00024234	18.2011	0.733954	0.364631	2.01287	0.0441287	0.110216	chrII	646927	653015	+	CBG00925
928	WBGene00024235	605.396	0.0358784	0.12408	0.289156	0.772462	0.863344	chrII	642569	645845	+	Cbr-pir-1
929	WBGene00024236	2318.2	-0.110292	0.0712908	-1.54707	0.121845	0.241318	chrII	599620	642350	-	Cbr-sec-5
930	WBGene00024237	1.27348	-0.0513468	0.339657	-0.151172	0.87984	NA	chrII	630203	633915	+	Cbr-srd-2
931	WBGene00024238	18.9389	0.0929889	0.354687	0.262172	0.793189	0.875986	chrII	626989	627252	+	CBG00930
932	WBGene00024239	1077.69	-0.0605302	0.085056	-0.711651	0.476681	0.638892	chrII	615309	621211	-	CBG00931
933	WBGene00024240	0.971593	0.0917962	0.322961	0.284233	0.776232	NA	chrII	610631	611426	+	CBG00932
934	WBGene00024241	6.05631	-0.335797	0.426653	-0.787049	0.431253	0.597309	chrII	609714	610133	+	CBG00933
935	WBGene00024242	843.663	-0.146886	0.0905492	-1.62217	0.104767	0.214843	chrII	589786	599108	-	CBG00934
936	WBGene00024243	792.759	-0.386719	0.113066	-3.42029	0.000625553	0.00328162	chrII	593573	597904	+	Cbr-dpl-1
937	WBGene00024244	2976.09	0.414194	0.0661482	6.2616	3.81036e-10	9.20035e-09	chrII	586468	589400	-	CBG00936
938	WBGene00024245	47.4793	0.722856	0.263572	2.74254	0.00609659	0.0224028	chrII	577431	579965	-	CBG00937
939	WBGene00024246	558.917	-1.08148	0.313148	-3.45356	0.000553232	0.00295157	chrII	574237	577448	+	Cbr-rhy-1
941	WBGene00024247	596.045	-0.791623	0.407207	-1.94403	0.0518918	0.125199	chrII	559121	563116	-	CBG00939
942	WBGene00024248	2310.3	-0.162388	0.123483	-1.31507	0.188488	0.334219	chrII	536588	557934	-	CBG00943
946	WBGene00024249	121.89	-0.533939	0.241094	-2.21465	0.0267842	0.0743379	chrII	542303	543112	+	CBG00944
947	WBGene00024250	169.232	-0.0876734	0.192277	-0.455976	0.648408	0.773669	chrII	534037	536581	+	CBG00945
948	WBGene00024251	91.249	1.70105	0.289511	5.87559	4.21335e-09	8.32759e-08	chrII	526353	532663	+	CBG00946
949	WBGene00024252	18.4401	1.06535	0.375443	2.83757	0.0045458	0.017569	chrII	526520	527637	-	CBG00947
950	WBGene00024253	645.474	-0.589607	0.178136	-3.30988	0.000933375	0.00461199	chrII	505683	523761	+	Cbr-exc-7
952	WBGene00024254	166.997	-0.382906	0.214943	-1.78142	0.0748431	0.166212	chrII	521113	523191	-	CBG00949
953	WBGene00024255	218.337	0.0662921	0.198257	0.334374	0.738097	0.840304	chrII	477418	480875	+	Cbr-zfp-2
954	WBGene00024256	211.058	-0.661773	0.255533	-2.58977	0.0096039	0.0327	chrII	472818	477293	+	CBG00952
955	WBGene00024257	24.0816	0.744482	0.327086	2.27611	0.0228395	0.0655653	chrII	466772	469724	+	CBG00953
956	WBGene00024258	2705.91	-0.412619	0.104479	-3.94929	7.83835e-05	0.000549447	chrII	460549	466545	+	Cbr-ugt-58
957	WBGene00024259	76.2142	2.04467	0.261036	7.83289	4.76772e-15	2.46096e-13	chrII	453541	456924	+	CBG00955
958	WBGene00024260	844.66	0.0902339	0.0850189	1.06134	0.288536	0.45386	chrII	452333	453266	+	Cbr-mrpl-53
959	WBGene00024261	1573.57	0.362753	0.0955458	3.79664	0.000146671	0.000941476	chrII	450209	452227	+	CBG00957
960	WBGene00024262	671.293	0.0646202	0.0913574	0.707334	0.479359	0.641462	chrII	447283	450087	+	CBG00958
961	WBGene00024263	828.956	0.309648	0.122857	2.52039	0.0117224	0.038426	chrII	442699	447185	+	Cbr-parp-2
962	WBGene00024264	638.013	0.0297206	0.114363	0.259879	0.794957	0.876988	chrII	440017	442563	+	CBG00960
963	WBGene00024265	1126.82	0.0148818	0.0843	0.176534	0.859875	0.91819	chrII	438001	439870	-	CBG00961
964	WBGene00024266	708.643	0.0540304	0.0864274	0.625153	0.531871	0.68516	chrII	435647	437966	-	Cbr-eral-1
965	WBGene00024267	4585	0.0752866	0.0547005	1.37634	0.168716	0.307692	chrII	423980	426164	+	CBG00964
966	WBGene00024268	2796.29	-0.0729638	0.0981805	-0.74316	0.457385	0.621343	chrII	414527	423534	-	Cbr-dnj-20
967	WBGene00024269	48.5117	0.43718	0.254231	1.71962	0.0855017	0.183889	chrII	410778	413624	+	CBG00967
968	WBGene00024270	64.5489	0.443723	0.243341	1.82347	0.0682329	0.154944	chrII	408232	410059	+	CBG00968
969	WBGene00024271	651.394	0.541347	0.155364	3.48438	0.00049327	0.00267353	chrII	406502	407439	+	CBG00969
970	WBGene00024272	9553.69	-0.437313	0.153273	-2.85317	0.00432858	0.0168898	chrII	403048	405705	+	CBG00970
971	WBGene00024273	94.9842	0.397254	0.220266	1.80352	0.0713061	0.160218	chrII	401151	401983	+	CBG00971
972	WBGene00024274	3804.28	0.791211	0.0738752	10.7101	9.12533e-27	1.22129e-24	chrII	397380	400494	-	Cbr-ufd-3
973	WBGene00024275	1130.3	0.18032	0.08646	2.08559	0.0370158	0.0959553	chrII	391027	397299	-	Cbr-flad-1
975	WBGene00024276	36.7537	0.0889106	0.292253	0.304225	0.760957	0.855142	chrII	386126	388281	-	CBG00975
976	WBGene00024277	9.36836	0.851295	0.420454	2.0247	0.0428979	0.107644	chrII	383382	384682	+	CBG00976
977	WBGene00024278	298.839	0.340772	0.331316	1.02854	0.303696	0.470394	chrII	381461	383205	+	CBG00977
978	WBGene00024279	21.6683	1.79908	0.399761	4.50039	6.78296e-06	6.43831e-05	chrII	374785	379002	+	CBG00978
979	WBGene00024280	1605.46	-0.275652	0.120437	-2.28877	0.0220928	0.0637831	chrII	364316	373087	+	Cbr-plx-2
980	WBGene00024281	453.584	-0.360071	0.10414	-3.45755	0.000545106	0.00291236	chrII	344132	348181	+	CBG00980
984	WBGene00024282	1258.15	-0.262226	0.080923	-3.24043	0.00119349	0.00568832	chrII	337445	341392	-	Cbr-smg-8
986	WBGene00024283	130.671	-0.617647	0.193786	-3.18726	0.00143626	0.00666779	chrII	320056	322389	-	Cbr-dmsr-6
987	WBGene00024284	1897.84	0.0455227	0.121987	0.373177	0.709017	0.819838	chrII	309244	315845	+	CBG00983
988	WBGene00024285	4125.55	-0.22369	0.0786356	-2.84464	0.00444613	0.0172621	chrII	301520	303528	+	Cbr-usp-14
989	WBGene00024286	378.247	-0.339713	0.162268	-2.09354	0.0363013	0.0945086	chrII	298709	300463	-	Cbr-vnut-1
990	WBGene00024287	2294.55	0.0320937	0.150105	0.213809	0.830696	0.900425	chrII	297067	298731	+	Cbr-cysl-2
991	WBGene00024288	3.55323	-0.298965	0.423841	-0.705371	0.480579	0.642544	chrII	291129	292012	+	CBG00988
992	WBGene00024289	270.518	-0.572289	0.205117	-2.79006	0.00526985	0.0198754	chrII	281068	284274	-	Cbr-aakg-5
993	WBGene00024290	16.8421	1.13386	0.392718	2.88721	0.00388673	0.0154732	chrII	279702	280531	+	CBG00990
994	WBGene00024291	24.3539	0.386589	0.321703	1.2017	0.229481	0.386048	chrII	278149	278880	+	CBG00991
995	WBGene00024292	5.35067	1.03931	0.423769	2.45254	0.014185	0.0446846	chrII	270491	271422	-	CBG00992
997	WBGene00024293	178.035	-1.02776	0.195029	-5.26976	1.36602e-07	1.96282e-06	chrII	259595	261248	-	CBG00994
998	WBGene00024294	818.903	-0.147303	0.101489	-1.45142	0.146663	0.277438	chrII	255797	259581	+	CBG00995
999	WBGene00024295	39276.1	-0.447079	0.0701649	-6.37184	1.86778e-10	4.84048e-09	chrII	251128	255697	+	Cbr-vgln-1
1000	WBGene00024296	432.88	-0.727597	0.128752	-5.65114	1.59385e-08	2.81205e-07	chrII	242175	243781	-	CBG00997
1001	WBGene00024297	93.1785	-0.967402	0.209338	-4.62125	3.81441e-06	3.86537e-05	chrII	238164	241074	+	Cbr-unc-4
1002	WBGene00024298	3.88073	0.594283	0.407812	1.45725	0.145048	0.275077	chrII	225066	234930	+	CBG00999
1003	WBGene00024299	25303.7	-0.889213	0.11758	-7.56262	3.95039e-14	1.8551e-12	chrII	220296	221882	+	Cbr-pho-11
1004	WBGene00024300	4711.94	-0.183701	0.0661052	-2.77892	0.00545401	0.0204793	chrII	210626	217532	-	CBG01003
1006	WBGene00024301	88.8367	0.0331328	0.205167	0.161492	0.871706	0.926178	chrII	209793	210625	+	Cbr-psf-1
1007	WBGene00024302	31635.6	0.246024	0.0494557	4.97463	6.5372e-07	8.07966e-06	chrII	208229	209603	-	CBG01005
1009	WBGene00024303	573.752	-0.143453	0.126112	-1.13751	0.255326	0.416329	chrII	203548	208002	-	Cbr-dtmk-1
1010	WBGene00024304	354.429	-0.504331	0.156653	-3.21942	0.00128452	0.00605173	chrII	194869	203547	+	Cbr-egl-43
1012	WBGene00024305	19.4743	1.83982	0.405341	4.53894	5.65383e-06	5.48606e-05	chrII	184665	186163	+	Cbr-arrd-8
1013	WBGene00024306	17.617	0.409773	0.377695	1.08493	0.277952	0.442943	chrII	181909	183051	+	CBG01011
1014	WBGene00024307	879.733	0.449032	0.118825	3.77893	0.000157504	0.000999375	chrII	179711	181401	+	Cbr-arrd-7
1015	WBGene00024308	1.12176	0.378875	0.318266	1.19044	0.233875	NA	chrII	175420	177404	-	CBG01013
1016	WBGene00024309	0.714024	0.185507	0.245824	0.754634	0.450469	NA	chrII	173344	175299	+	CBG01014
1017	WBGene00024310	0	NA	NA	NA	NA	NA	chrII	172778	173234	-	CBG01015
1018	WBGene00024311	0.157723	-0.0223768	0.172057	-0.130055	0.896523	NA	chrII	170931	172392	-	Cbr-arrd-2
1019	WBGene00024312	57.1126	0.353911	0.241914	1.46296	0.143478	0.273007	chrII	166623	168732	+	CBG01018
1020	WBGene00024313	92.3827	-0.77385	0.198461	-3.89926	9.64882e-05	0.000658136	chrII	160086	161661	-	Cbr-arrd-4
1021	WBGene00024314	10.3542	0.441736	0.404292	1.09262	0.274562	0.439386	chrII	157834	158418	-	CBG01021
1023	WBGene00024315	138.175	-0.456691	0.182689	-2.49983	0.0124251	0.0403273	chrII	155123	156500	-	CBG01022
1024	WBGene00024316	72.2823	0.550864	0.309608	1.77923	0.0752023	0.166818	chrII	149987	152567	-	Cbr-arrd-5
1025	WBGene00024317	8.48039	0.845788	0.424055	1.99452	0.0460949	0.114017	chrII	148316	150513	+	CBG01024
1026	WBGene00024318	2.29814	0.819446	0.359468	2.27961	0.0226309	0.0650759	chrII	146932	148164	+	CBG01025
1028	WBGene00024319	15.2647	-0.406982	0.396551	-1.0263	0.304748	0.471438	chrII	143257	144760	-	Cbr-eyg-1
1029	WBGene00024320	17.1714	0.238719	0.368822	0.647246	0.517473	0.673466	chrII	140688	142509	+	Cbr-cyp-13A6
1030	WBGene00024321	42.9307	0.273077	0.330554	0.826118	0.408737	0.576478	chrII	138566	140391	+	Cbr-cyp-13A8
1031	WBGene00024322	563.348	0.131507	0.134638	0.976742	0.328697	0.497077	chrII	135204	137157	-	CBG01029
1033	WBGene00024324	66.8107	-0.0596702	0.219407	-0.271962	0.785651	0.871164	chrII	132642	134795	-	CBG01031
1034	WBGene00024325	51.7253	-0.58131	0.295075	-1.97004	0.0488337	0.119327	chrII	126759	127816	-	CBG01032
1035	WBGene00024326	11412.2	-0.264196	0.0800068	-3.30217	0.000959392	0.00471938	chrII	123551	125984	+	Cbr-cyp-13A2
1036	WBGene00024327	115.485	-1.28321	0.297105	-4.31904	1.56713e-05	0.000135004	chrII	119770	122111	+	CBG01034
1040	WBGene00024328	2546.16	0.362394	0.100361	3.61089	0.000305144	0.00176575	chrII	116128	119062	+	CBG01035
1041	WBGene00024329	1756.34	-0.17096	0.0762557	-2.24193	0.024966	0.070367	chrII	110944	114751	-	Cbr-aqp-10
1042	WBGene00024330	950.788	-0.510377	0.0950658	-5.36867	7.93195e-08	1.21027e-06	chrII	100445	110561	+	Cbr-shk-1
1044	WBGene00024331	1565.59	-0.110803	0.0840192	-1.31878	0.187242	0.332702	chrII	93731	95602	+	Cbr-nlp-11
1045	WBGene00024332	3639.09	-0.309979	0.0878793	-3.52733	0.000419778	0.00232497	chrII	84509	88163	+	Cbr-nos-3
1046	WBGene00024333	4596.25	-0.334651	0.10932	-3.06122	0.00220438	0.0095787	chrII	81170	83903	-	CBG01041
1047	WBGene00024334	9512.39	0.417741	0.0541951	7.70811	1.27695e-14	6.313e-13	chrII	77728	81080	-	Cbr-pno-1
1048	WBGene00024335	25.74	-0.0428745	0.348068	-0.123178	0.901966	0.944863	chrII	71581	76046	+	Cbr-mab-3.1
1049	WBGene00024336	27.82	-1.05563	0.366693	-2.87879	0.00399205	0.0158037	chrII	65299	70145	+	Cbr-mab-3.2
1050	WBGene00024337	15.0604	1.58872	0.427299	3.71806	0.000200761	0.0012378	chrII	55554	56065	+	CBG01046
1051	WBGene00024338	24.7093	0.267223	0.401685	0.665257	0.505886	0.664479	chrII	56203	57770	-	Cbr-cutl-2
1052	WBGene00024339	1209.63	1.65998	0.280223	5.9238	3.14587e-09	6.38614e-08	chrII	53679	54468	+	CBG01048
1053	WBGene00024340	4.25461	0.0713512	0.404957	0.176194	0.860141	0.918305	chrII	51162	51898	-	CBG01049
1054	WBGene00024341	205.977	-0.448056	0.175845	-2.54801	0.0108339	0.0360767	chrII	43541	46553	-	Cbr-glt-5
1055	WBGene00024342	665.803	-0.285471	0.0909742	-3.13793	0.00170143	0.00771719	chrII	41939	43294	-	CBG01051
1056	WBGene00024343	1191.24	-0.158525	0.10858	-1.45999	0.144294	0.274091	chrII	39118	40754	-	Cbr-mop-25.2
1057	WBGene00024344	815.733	0.146808	0.105726	1.38857	0.164963	0.302379	chrII	35432	38223	-	Cbr-wee-1.3
1059	WBGene00024345	1483.05	0.111957	0.0883929	1.26659	0.205303	0.356149	chrII	33113	34939	-	CBG01054
1060	WBGene00024346	158.729	-0.778539	0.198929	-3.91365	9.09132e-05	0.000626495	chrII	32025	33112	+	CBG01055
1061	WBGene00024347	19.5037	0.0451277	0.382871	0.117867	0.906173	0.947434	chrII	28105	29867	+	CBG01056
1062	WBGene00024348	710.355	0.00912354	0.177703	0.0513414	0.959053	0.976562	chrII	22761	24820	-	Cbr-taf-8
1063	WBGene00024349	316.556	-0.0250353	0.221957	-0.112794	0.910194	0.949572	chrII	20699	21990	-	CBG01058
1064	WBGene00024350	819.685	0.0565162	0.0885862	0.63798	0.523487	0.67809	chrII	18230	20109	-	Cbr-arc-1
1065	WBGene00024351	483.511	-0.311563	0.135858	-2.2933	0.0218305	0.0631735	chrII	16002	18139	-	Cbr-cyp-13A10
1066	WBGene00024352	6153.89	0.29403	0.0648843	4.5316	5.85381e-06	5.64502e-05	chrII	13861	15061	-	CBG01061
1067	WBGene00024353	2082.7	0.258672	0.0711739	3.63437	0.000278661	0.00162809	chrII	11725	13552	+	CBG01062
1069	WBGene00024354	56.0345	0.388935	0.248315	1.5663	0.117279	0.23417	chrII	8122	9355	-	CBG01064
1070	WBGene00024355	715.069	0.434971	0.177472	2.45092	0.0142491	0.0448639	chrII	5572	7295	+	CBG01066
1071	WBGene00024356	804.051	0.286946	0.135596	2.11618	0.0343297	0.0905582	chrII	3604	5501	+	Cbr-sqv-8
1072	WBGene00024357	1140.22	-0.0397645	0.132291	-0.300583	0.763732	0.85704	chrV	5231257	5237432	+	Cbr-phf-10
1074	WBGene00024358	1194.26	-0.150571	0.162826	-0.924734	0.355104	0.524855	chrV	5203934	5209201	-	Cbr-npr-5
1076	WBGene00024359	47.9415	-0.173078	0.348207	-0.497054	0.619151	0.752483	chrV	5194704	5198851	-	CBG01074
1077	WBGene00024360	17.1153	2.07508	0.404577	5.12901	2.9127e-07	3.92628e-06	chrV	5181786	5194288	-	Cbr-oac-55
1079	WBGene00024361	606.004	0.186543	0.0976471	1.91038	0.0560848	0.133138	chrV	5176961	5181671	+	CBG01076
1080	WBGene00024362	2019.76	-0.0854756	0.0883415	-0.967558	0.333265	0.502146	chrV	5175092	5176016	-	Cbr-rab-1
1081	WBGene00024363	131.576	0.84386	0.223292	3.77917	0.000157352	0.000998746	chrV	5171178	5174531	+	CBG01078
1082	WBGene00024364	1.42825	-0.194955	0.292717	-0.666021	0.505397	NA	chrV	5149592	5150250	+	CBG01080
1083	WBGene00024365	79.2895	-0.316718	0.28793	-1.09998	0.271341	0.435656	chrV	5147832	5148946	-	CBG01081
1084	WBGene00024366	1083.27	-0.0766933	0.115322	-0.665034	0.506029	0.664533	chrV	5121319	5136138	-	Cbr-madd-2
1085	WBGene00024367	56.5649	0.305151	0.293428	1.03995	0.298361	0.464319	chrV	5116549	5117097	-	CBG01083
1086	WBGene00024368	1046.42	-0.485856	0.0902178	-5.38537	7.22969e-08	1.114e-06	chrV	5109100	5116432	+	CBG01084
1087	WBGene00024370	451.007	0.392708	0.159732	2.45854	0.0139504	0.0441163	chrV	5102080	5104456	+	Cbr-wrb-1
1088	WBGene00024371	473.626	0.0720403	0.141024	0.510835	0.609466	0.745354	chrV	5095321	5101764	-	CBG01087
1089	WBGene00024373	30.3362	0.0255744	0.306821	0.0833528	0.933571	0.963087	chrV	5090662	5095130	+	CBG01090
1090	WBGene00024376	1313.81	4.35296	0.124148	35.0627	2.50143e-269	2.75702e-266	chrV	5076897	5087062	-	Cbr-ptr-16
1091	WBGene00024377	28040.9	0.873595	0.087808	9.94893	2.5492e-23	2.76095e-21	chrV	5073447	5075980	-	CBG01095
1092	WBGene00024378	233.831	0.599273	0.178161	3.36366	0.000769167	0.00391202	chrV	5069753	5072648	-	CBG01096
1093	WBGene00024379	5261.67	-0.00982002	0.0693487	-0.141604	0.887393	0.936104	chrV	5062324	5069388	+	Cbr-cmd-1
1094	WBGene00024380	33.529	0.374415	0.323494	1.15741	0.247106	0.406829	chrV	5050858	5053989	+	Cbr-cutl-22
1095	WBGene00024381	5.25891	-0.348009	0.425617	-0.817658	0.413553	0.581305	chrV	5048416	5048706	+	CBG01101
1096	WBGene00024382	1179.66	-0.633922	0.134282	-4.72082	2.34896e-06	2.51069e-05	chrV	5044904	5048285	+	Cbr-cpr-8
1097	WBGene00024383	47982.9	0.0248128	0.105783	0.234563	0.814548	0.88982	chrV	5042661	5044266	+	Cbr-cpr-5
1098	WBGene00024384	47.5319	1.54267	0.349452	4.41454	1.01225e-05	9.15818e-05	chrV	5039698	5041817	-	CBG01104
1099	WBGene00024385	347.928	0.525481	0.138309	3.79932	0.000145092	0.000932943	chrV	5021432	5039481	+	CBG01105
1100	WBGene00024387	3.42624	-0.436308	0.407346	-1.0711	0.284125	0.449063	chrV	5015412	5015624	+	CBG01107
1101	WBGene00024388	2.94655	0.146221	0.397679	0.367685	0.713108	0.82326	chrV	5013478	5014314	-	CBG01108
1102	WBGene00024389	1.12932	0.0145538	0.350835	0.0414833	0.966911	NA	chrV	4994673	4996092	-	CBG01110
1103	WBGene00024390	401.791	-0.140041	0.398908	-0.351061	0.725543	0.831467	chrV	4992354	4992771	+	CBG01112
1118	WBGene00024391	11641.3	0.452151	0.0850808	5.31437	1.07029e-07	1.57287e-06	chrV	4990811	4991259	+	CBG01113
1133	WBGene00024392	6.55299	0.290763	0.42776	0.679734	0.496673	0.656473	chrV	4987059	4987365	-	CBG01114
1134	WBGene00024393	227.947	0.0698527	0.202656	0.344686	0.73033	0.834818	chrV	4978746	4986742	+	CBG01115
1136	WBGene00024394	1605.93	-0.116973	0.0824937	-1.41796	0.156203	0.290614	chrV	4968749	4978516	+	Cbr-mct-1
1138	WBGene00024395	175.194	0.120392	0.186883	0.64421	0.519439	0.675253	chrV	4971238	4973028	-	CBG01117
1140	WBGene00024396	149.727	-0.125616	0.29605	-0.424305	0.671343	0.790632	chrV	4965216	4970030	-	CBG01118
1142	WBGene00024397	452.196	0.0606533	0.110982	0.546514	0.584712	0.727297	chrV	4962409	4965157	+	CBG01119
1144	WBGene00024398	1.98028	-0.15228	0.368423	-0.413329	0.679366	0.797074	chrV	4954317	4960152	-	CBG01120
1145	WBGene00024399	0.109469	-0.0223768	0.172057	-0.130055	0.896523	NA	chrV	4952867	4953679	+	CBG01121
1146	WBGene00024400	3.33463	-0.0757552	0.413555	-0.183181	0.854656	0.915016	chrV	4948611	4952365	-	Cbr-srd-72
1148	WBGene00024401	200.719	0.0840462	0.179889	0.467212	0.640348	0.767663	chrV	4943942	4945727	+	CBG01124
1152	WBGene00024402	9.78704	-0.0215238	0.420507	-0.0511854	0.959178	0.976586	chrV	4939731	4942903	+	Cbr-srd-60
1154	WBGene00024403	5.15427	0.437942	0.42668	1.02639	0.304706	0.471412	chrV	4933716	4935205	+	Cbr-srd-61
1156	WBGene00024404	0.762278	0.16857	0.250817	0.672082	0.501532	NA	chrV	4929341	4930533	-	CBG01127
1157	WBGene00024405	28.1201	0.553507	0.395331	1.40011	0.161481	0.297801	chrV	4923976	4924299	-	CBG01129
1172	WBGene00024406	19.0247	0.273139	0.347073	0.786978	0.431295	0.597322	chrV	4921798	4923769	+	CBG01130
1173	WBGene00024407	0.624771	0.0450209	0.196852	0.228705	0.819098	NA	chrV	4919429	4920452	+	CBG01132
1174	WBGene00024408	25.7603	1.00582	0.386963	2.59926	0.00934255	0.0319904	chrV	4913133	4915026	+	Cbr-irld-30
1182	WBGene00024409	32.8101	0.189453	0.305508	0.620125	0.535176	0.687485	chrV	4907241	4911906	-	Cbr-irld-25
1183	WBGene00024410	23.0904	-0.618099	0.361955	-1.70767	0.0876982	0.1875	chrV	4904339	4906292	-	CBG01135
1184	WBGene00024411	6.71999	0.840112	0.427584	1.96479	0.049439	0.120444	chrV	4895895	4903904	-	CBG01136
1185	WBGene00024413	131.728	-0.096693	0.169234	-0.571359	0.567757	0.713389	chrV	4892982	4895592	+	CBG01138
1186	WBGene00024414	27.8698	0.0540961	0.315108	0.171675	0.863693	0.920536	chrV	4888951	4891919	+	Cbr-irld-22
1191	WBGene00024415	35.3089	-0.833675	0.317797	-2.62329	0.00870853	0.0301946	chrV	4885734	4886518	-	CBG01140
1192	WBGene00024416	0.778298	0.00250416	0.284328	0.00880728	0.992973	NA	chrV	4880435	4881967	-	CBG01141
1193	WBGene00024418	4.672	0.0606957	0.4242	0.143083	0.886225	0.935613	chrV	4871061	4875170	+	CBG01143
1194	WBGene00024420	0.825323	0.282046	0.293551	0.960808	0.336648	NA	chrV	4869696	4870510	+	CBG01145
1196	WBGene00024421	0	NA	NA	NA	NA	NA	chrV	4868570	4869325	-	CBG01146
1197	WBGene00024422	1.9839	-0.58093	0.362716	-1.60161	0.109242	0.221712	chrV	4867136	4868431	+	CBG01147
1198	WBGene00024423	197.769	-0.632492	0.16617	-3.8063	0.000141058	0.000909815	chrV	4864866	4866310	+	CBG01148
1199	WBGene00024424	1.75838	-0.0510269	0.328523	-0.155322	0.876567	0.929341	chrV	4854324	4858457	-	CBG01149
1200	WBGene00024425	3.77367	0.0289077	0.425925	0.0678704	0.945889	0.969748	chrV	4852404	4854052	-	CBG01150
1201	WBGene00024426	14.965	-1.11033	0.391488	-2.83617	0.00456575	0.0176221	chrV	4845880	4848943	-	CBG01151
1204	WBGene00024427	3.28097	-0.444415	0.40945	-1.0854	0.277747	0.44283	chrV	4845101	4845886	+	CBG01152
1205	WBGene00024428	4.74935	0.443967	0.425714	1.04287	0.297006	0.462864	chrV	4839148	4840875	-	CBG01154
1206	WBGene00024429	6.22208	-0.0359183	0.413474	-0.0868694	0.930775	0.961196	chrV	4836247	4837587	+	Cbr-srj-33
1207	WBGene00024430	4.34113	0.475657	0.427154	1.11355	0.265473	0.428512	chrV	4833077	4834332	-	CBG01156
1210	WBGene00024431	11.2139	0.0601191	0.396094	0.15178	0.879361	0.931091	chrV	4830493	4832152	+	CBG01158
1211	WBGene00024432	270.893	-0.218464	0.141489	-1.54403	0.122581	0.242431	chrV	4824526	4825908	-	CBG01159
1212	WBGene00024433	293.039	0.0701511	0.134586	0.521237	0.602202	0.740141	chrV	4818057	4824547	-	Cbr-folt-2
1213	WBGene00024434	138.518	2.02457	0.236588	8.55739	1.15451e-17	7.95295e-16	chrV	4821599	4823647	+	CBG01161
1214	WBGene00024435	19838.9	0.458307	0.108347	4.22999	2.33698e-05	0.000191214	chrV	4816371	4817736	-	Cbr-clec-85
1217	WBGene00024436	16.7843	0.505309	0.386372	1.30783	0.190931	0.337275	chrV	4814557	4815650	-	CBG01163
1220	WBGene00024437	1.61152	0.210529	0.323125	0.65154	0.514698	NA	chrV	4813281	4814305	+	CBG01164
1221	WBGene00024438	0.280746	-0.0614231	0.172259	-0.356574	0.721411	NA	chrV	4807421	4808456	-	Cbr-srh-241
1222	WBGene00024439	0.938747	-0.348781	0.273224	-1.27654	0.201765	NA	chrV	4801948	4803563	+	Cbr-srh-271
1224	WBGene00024440	0.508741	-0.0474145	0.224733	-0.210981	0.832902	NA	chrV	4799888	4801664	+	CBG01168
1226	WBGene00024441	4.25148	-0.985998	0.409796	-2.40607	0.0161251	0.0495873	chrV	4794344	4795123	-	CBG01169
1227	WBGene00024442	0	NA	NA	NA	NA	NA	chrV	4789290	4790474	-	CBG01170
1232	WBGene00024443	0	NA	NA	NA	NA	NA	chrV	4788705	4788976	-	CBG01171
1233	WBGene00024444	0	NA	NA	NA	NA	NA	chrV	4785779	4787339	-	CBG01172
1234	WBGene00024445	0.17974	0.0587315	0.172057	0.34135	0.73284	NA	chrV	4780745	4782816	-	CBG01173
1235	WBGene00024446	0	NA	NA	NA	NA	NA	chrV	4777939	4779105	+	CBG01175
1240	WBGene00024447	3.15311	-0.251868	0.405147	-0.62167	0.534159	0.686881	chrV	4771487	4773468	-	CBG01177
1241	WBGene00024448	6.78718	-0.534716	0.424705	-1.25903	0.20802	0.359696	chrV	4767208	4771003	-	CBG01178
1242	WBGene00024449	0	NA	NA	NA	NA	NA	chrV	4761964	4763820	+	CBG01179
1243	WBGene00024450	0	NA	NA	NA	NA	NA	chrV	4760307	4761583	+	CBG01180
1244	WBGene00024451	3.12076	0.133348	0.42036	0.317224	0.751074	0.848946	chrV	4758043	4758519	+	CBG01181
1245	WBGene00024452	293.221	0.250369	0.152064	1.64647	0.0996661	0.206644	chrV	4750235	4755049	-	CBG01182
1247	WBGene00024453	0.202917	0.0587315	0.172057	0.34135	0.73284	NA	chrV	4747469	4750059	+	CBG01183
1249	WBGene00024454	3.12076	0.133348	0.42036	0.317224	0.751074	0.848946	chrV	4744914	4745390	+	CBG01184
1250	WBGene00024455	5.60887	1.4393	0.409492	3.51486	0.000439992	0.00241976	chrV	4739323	4739922	+	CBG01185
1253	WBGene00024456	25.3231	2.18601	0.380414	5.74641	9.11591e-09	1.67128e-07	chrV	4732555	4733420	-	CBG01188
1256	WBGene00024457	1.7739	0.290434	0.321017	0.904732	0.365608	0.53527	chrV	4730618	4731751	+	CBG01189
1257	WBGene00024459	1.45922	0.31798	0.328794	0.96711	0.333489	NA	chrV	4728104	4728862	-	CBG01191
1260	WBGene00024460	52.7591	-0.0479788	0.276014	-0.173828	0.862001	0.919517	chrV	4720249	4723490	-	CBG01192
1261	WBGene00024461	2.25868	-0.676448	0.375429	-1.8018	0.0715774	0.160635	chrV	4716694	4718032	-	CBG01193
1262	WBGene00024462	1.34605	0.0664828	0.27441	0.242276	0.808566	NA	chrV	4715834	4716592	+	CBG01194
1265	WBGene00024463	0	NA	NA	NA	NA	NA	chrV	4714756	4715232	-	CBG01195
1266	WBGene00024464	3.08825	-0.128296	0.415677	-0.308642	0.757594	0.852765	chrV	4714068	4714494	+	CBG01196
1267	WBGene00024465	0.382657	0.102037	0.175306	0.582054	0.56053	NA	chrV	4710562	4711358	+	CBG01197
1268	WBGene00024466	45.5191	0.900404	0.281616	3.19727	0.00138733	0.0064808	chrV	4704534	4708259	-	Cbr-nhr-186
1272	WBGene00024467	8.44328	-0.148389	0.425104	-0.349066	0.72704	0.83251	chrV	4699264	4703059	-	Cbr-nhr-185
1273	WBGene00024468	19.4999	-0.129693	0.351543	-0.368926	0.712183	0.822395	chrV	4685851	4687711	+	CBG01201
1274	WBGene00024469	243.975	-0.620629	0.147711	-4.20163	2.64994e-05	0.000213649	chrV	4677003	4693502	-	CBG01202
1276	WBGene00024470	12.6583	-0.64733	0.4109	-1.5754	0.115165	0.230983	chrV	4678298	4678889	+	CBG01203
1277	WBGene00024471	3.60878	0.320416	0.40431	0.792503	0.428068	0.594346	chrV	4675341	4676004	+	CBG01204
1280	WBGene00024472	15.2811	0.175255	0.386618	0.453304	0.65033	0.774838	chrV	4673043	4673936	+	CBG01205
1281	WBGene00024473	0.608751	0.130672	0.173305	0.753998	0.45085	NA	chrV	4670388	4672848	+	CBG01206
1283	WBGene00024474	4.51117	1.02967	0.393455	2.617	0.00887064	0.0306772	chrV	4668803	4669665	+	Cbr-scl-12
1285	WBGene00024475	6.88845	1.82944	0.428059	4.27381	1.92162e-05	0.000161312	chrV	4665826	4666600	+	CBG01208
1287	WBGene00024476	9.48965	1.21423	0.426444	2.84732	0.00440885	0.0171423	chrV	4659510	4662642	+	CBG01210
1288	WBGene00024477	455.013	-0.577672	0.144038	-4.01056	6.05748e-05	0.000435864	chrV	4654115	4656732	-	Cbr-ugt-1
1289	WBGene00024478	4.05421	0.435174	0.418776	1.03916	0.298732	0.464625	chrV	4647849	4653955	+	CBG01212
1290	WBGene00024479	252.638	0.158858	0.330986	0.479954	0.63126	0.761128	chrV	4644785	4645870	+	CBG01213
1291	WBGene00024480	0.878739	-0.0416806	0.285713	-0.145883	0.884014	NA	chrV	4642892	4644458	+	CBG01214
1294	WBGene00024481	0.853662	-0.0203638	0.285502	-0.0713263	0.943138	NA	chrV	4639916	4642327	+	CBG01215
1297	WBGene00024482	1.27742	-0.0672247	0.345111	-0.194791	0.845556	NA	chrV	4629669	4631926	-	CBG01216
1303	WBGene00024483	0.904382	-0.240974	0.303276	-0.794571	0.426863	NA	chrV	4624590	4625981	-	CBG01217
1309	WBGene00024484	1.39831	0.271839	0.365278	0.744198	0.456757	NA	chrV	4622681	4623684	-	CBG01218
1310	WBGene00024485	4.3626	-0.604459	0.422958	-1.42912	0.152968	0.286102	chrV	4621046	4622331	+	CBG01219
1311	WBGene00024486	57.3978	-0.376423	0.262061	-1.43639	0.150891	0.283262	chrV	4613943	4617295	-	CBG01220
1312	WBGene00024487	1.29854	0.194721	0.312637	0.622833	0.533394	NA	chrV	4612627	4614040	+	CBG01221
1313	WBGene00024488	1.05848	0.0329404	0.297343	0.110782	0.911789	NA	chrV	4609114	4610461	+	CBG01222
1316	WBGene00024489	1.11149	-0.125705	0.31156	-0.403471	0.686602	NA	chrV	4607945	4608825	+	CBG01223
1319	WBGene00024490	0.7026	-0.115912	0.247113	-0.469067	0.639022	NA	chrV	4604920	4606412	+	CBG01224
1322	WBGene00024491	13.668	-1.26	0.398722	-3.1601	0.00157717	0.00723591	chrV	4602694	4604169	-	CBG01225
1325	WBGene00024492	2.03547	0.561699	0.36643	1.53289	0.125302	0.246228	chrV	4594608	4598500	-	CBG01226
1351	WBGene00024493	219.433	-0.659347	0.141004	-4.67607	2.92418e-06	3.0575e-05	chrV	4592501	4594213	+	CBG01227
1355	WBGene00024494	372.741	-0.470836	0.167091	-2.81785	0.00483469	0.0184901	chrV	4585011	4587699	+	Cbr-nhr-228
1356	WBGene00024495	70.593	-1.11964	0.244549	-4.57841	4.68528e-06	4.65225e-05	chrV	4581319	4583158	+	Cbr-fbxa-137
1357	WBGene00024496	6.66773	0.469979	0.427349	1.09975	0.271439	0.435739	chrV	4578631	4579846	+	CBG01231
1358	WBGene00024497	80.2274	0.15765	0.235629	0.66906	0.503457	0.662217	chrV	4576169	4578145	+	CBG01232
1359	WBGene00024498	240.594	0.327572	0.233343	1.40382	0.160372	0.296427	chrV	4572804	4574716	-	Cbr-nhr-275
1361	WBGene00024499	165.829	-0.0992426	0.230427	-0.43069	0.666694	0.787136	chrV	4570581	4572495	-	CBG01234
1363	WBGene00024500	309.053	0.298488	0.191315	1.56019	0.118714	0.236393	chrV	4567222	4569280	-	Cbr-nhr-182
1365	WBGene00024501	507.985	0.362566	0.146841	2.4691	0.0135452	0.0431481	chrV	4564261	4567221	+	CBG01236
1370	WBGene00024502	216.962	0.648001	0.189347	3.42229	0.000620964	0.00326276	chrV	4561000	4563079	+	CBG01238
1371	WBGene00024503	96.8852	0.258461	0.239171	1.08065	0.279851	0.444746	chrV	4559323	4560856	+	CBG01239
1377	WBGene00024504	284.872	0.346067	0.208399	1.6606	0.0967943	0.202099	chrV	4556983	4559147	+	Cbr-nhr-134
1383	WBGene00024505	296.21	0.253334	0.190724	1.32828	0.184087	0.328343	chrV	4554537	4556776	+	CBG01241
1389	WBGene00024506	73.2955	0.152556	0.243534	0.626425	0.531036	0.684509	chrV	4548477	4550843	+	CBG01242
1390	WBGene00024507	256.883	0.18117	0.24424	0.741771	0.458226	0.622113	chrV	4545815	4548499	-	Cbr-nhr-190.2
1391	WBGene00024508	30.9156	0.254527	0.358353	0.710268	0.477538	0.639756	chrV	4543999	4545457	-	CBG01244
1392	WBGene00024509	149.555	0.628417	0.314976	1.99513	0.0460289	0.113884	chrV	4540181	4543168	+	CBG01245
1393	WBGene00024510	216.131	0.401666	0.233041	1.72358	0.0847829	0.182742	chrV	4537311	4539340	-	Cbr-nhr-190.1
1394	WBGene00024511	24.3146	0.221525	0.374932	0.59084	0.554627	0.70264	chrV	4535638	4536869	-	CBG01247
1395	WBGene00024512	217.09	0.754343	0.21332	3.53621	0.000405919	0.00225523	chrV	4533406	4535215	-	CBG01248
1396	WBGene00024513	9.40548	1.23172	0.421951	2.9191	0.00351046	0.0142029	chrV	4532608	4533317	+	Cbr-dod-3
1398	WBGene00024514	331.462	0.217775	0.134313	1.6214	0.104932	0.215129	chrV	4529264	4531206	-	Cbr-nhr-184
1400	WBGene00024515	262.274	0.249588	0.157847	1.5812	0.113832	0.22887	chrV	4526569	4528994	-	CBG01251
1402	WBGene00024517	48.2745	-0.118241	0.272343	-0.43416	0.664172	0.785198	chrV	4519443	4521656	+	CBG01253
1403	WBGene00024518	46.8944	0.0660425	0.270864	0.243822	0.807369	0.884798	chrV	4516919	4518209	-	CBG01254
1404	WBGene00024520	28.1916	0.407958	0.34205	1.19269	0.232992	0.390097	chrV	4511953	4514228	-	Cbr-cyp-33C12
1405	WBGene00024521	74.5428	-0.61475	0.237696	-2.58628	0.00970182	0.0329795	chrV	4508735	4511347	-	Cbr-cyp-32B1
1407	WBGene00024522	239.611	-0.07719	0.20607	-0.374581	0.707972	0.818844	chrV	4505773	4508687	+	Cbr-nhr-13
1409	WBGene00024525	68.5325	0.919319	0.32294	2.84671	0.00441729	0.0171663	chrV	4494714	4497018	+	CBG01263
1410	WBGene00024526	3.90734	-0.735943	0.416814	-1.76564	0.0774567	0.170601	chrV	4493089	4494184	+	CBG01264
1411	WBGene00024527	5535.92	0.583585	0.154157	3.78566	0.000153301	0.000977467	chrV	4482564	4489301	-	Cbr-abt-4
1412	WBGene00024528	7.78982	0.995037	0.425081	2.34082	0.0192415	0.0571812	chrV	4480345	4481875	-	CBG01266
1413	WBGene00024529	0.479467	-0.0317994	0.2246	-0.141582	0.88741	NA	chrV	4477655	4478713	-	CBG01267
1414	WBGene00024530	12.5745	0.404232	0.391327	1.03298	0.301615	0.467943	chrV	4475692	4477625	+	Cbr-cyp-34A4
1415	WBGene00024531	34.0503	0.307147	0.292789	1.04904	0.294161	0.459803	chrV	4472267	4475481	+	Cbr-cyp-34A5
1416	WBGene00024532	422.404	-0.753335	0.164875	-4.56914	4.89725e-06	4.82947e-05	chrV	4468647	4470739	+	Cbr-cyp-34A9
1420	WBGene00024533	2.81167	0.351161	0.391657	0.896603	0.369931	0.53987	chrV	4465226	4467001	+	CBG01271
1424	WBGene00024534	33.8927	0.151344	0.355275	0.42599	0.670115	0.789819	chrV	4460943	4462694	+	Cbr-cyp-34A10
1425	WBGene00024535	7.92575	0.529192	0.427983	1.23648	0.21628	0.369394	chrV	4455900	4458235	-	Cbr-str-82
1427	WBGene00024536	146.725	0.634446	0.243487	2.60567	0.00916943	0.0315301	chrV	4454490	4456005	+	Cbr-nlp-34.1
1428	WBGene00024537	6195.22	0.533028	0.13826	3.85525	0.000115612	0.000765989	chrV	4453533	4454081	-	Cbr-nlp-27
1429	WBGene00024538	48.9825	1.36007	0.320069	4.24929	2.14452e-05	0.00017756	chrV	4449253	4452242	+	CBG01276
1430	WBGene00024539	944.15	0.690632	0.121086	5.70364	1.17273e-08	2.11691e-07	chrV	4448448	4448709	-	Cbr-nlp-34.2
1431	WBGene00024540	12.1098	-1.00398	0.421959	-2.37933	0.0173439	0.0525847	chrV	4444929	4446400	+	Cbr-srx-64
1432	WBGene00024541	1.93365	-0.19457	0.315381	-0.616936	0.537277	0.689376	chrV	4441622	4443278	+	Cbr-srx-66
1436	WBGene00024542	0	NA	NA	NA	NA	NA	chrV	4435996	4436934	+	CBG01280
1437	WBGene00024543	0.198721	0.0587315	0.172057	0.34135	0.73284	NA	chrV	4429529	4430514	+	CBG01282
1438	WBGene00024544	6.46433	-0.203876	0.425842	-0.47876	0.632109	0.761618	chrV	4426159	4427312	-	Cbr-srx-68
1440	WBGene00024545	8.60933	0.205305	0.427451	0.480302	0.631013	0.760927	chrV	4424126	4425910	+	CBG01284
1441	WBGene00024546	14143.4	0.0418218	0.108896	0.384052	0.70094	0.813624	chrV	4422843	4423973	-	CBG01286
1446	WBGene00024547	2.66776	-0.205039	0.385119	-0.532405	0.594445	0.733978	chrV	4421577	4422353	-	CBG01287
1451	WBGene00024548	261.814	0.274642	0.205884	1.33396	0.182215	0.325709	chrV	4420287	4421235	-	CBG01288
1456	WBGene00024549	1.58767	0.329714	0.363102	0.908047	0.363853	NA	chrV	4415233	4415818	-	CBG01289
1457	WBGene00024551	1.15766	0.0088305	0.269515	0.0327644	0.973862	NA	chrV	4412760	4414283	-	CBG01291
1458	WBGene00024552	0.267192	-0.0614231	0.172259	-0.356574	0.721411	NA	chrV	4409238	4410023	-	CBG01292
1459	WBGene00024553	1.29131	0.0832626	0.321698	0.258822	0.795773	NA	chrV	4407943	4409030	-	CBG01293
1460	WBGene00024554	21.7722	-0.640857	0.374624	-1.71067	0.0871425	0.18654	chrV	4402364	4404490	-	CBG01294
1461	WBGene00024555	0.460486	-0.0311858	0.222638	-0.140074	0.888602	NA	chrV	4396069	4400688	-	CBG01295
1462	WBGene00024556	0.198721	0.0587315	0.172057	0.34135	0.73284	NA	chrV	4390182	4392844	-	CBG01296
1463	WBGene00024557	1.48219	-0.297437	0.290125	-1.0252	0.305268	NA	chrV	4385173	4386367	+	Cbr-srj-57
1468	WBGene00024558	0.312386	0.0193148	0.172208	0.11216	0.910697	NA	chrV	4378489	4378993	+	Cbr-grl-27.1
1469	WBGene00024559	0	NA	NA	NA	NA	NA	chrV	4377451	4377994	-	Cbr-grl-27.2
1470	WBGene00024560	1.67998	-0.509497	0.351209	-1.45069	0.146865	0.27768	chrV	4375490	4377114	-	Cbr-sri-21
1471	WBGene00024561	257.33	0.347684	0.176517	1.96969	0.0488739	0.119394	chrV	4370826	4375226	-	CBG01302
1481	WBGene00024562	1222.87	0.0940684	0.074255	1.26683	0.205217	0.356098	chrV	4367863	4369550	-	CBG01303
1483	WBGene00024563	247.332	-0.460658	0.148186	-3.10864	0.00187951	0.00840087	chrV	4366246	4367866	-	CBG01304
1485	WBGene00024564	256.935	0.0647453	0.23394	0.27676	0.781964	0.869329	chrV	4363514	4365942	-	CBG01305
1487	WBGene00024565	2593.34	-0.458648	0.240993	-1.90316	0.0570201	0.13488	chrV	4361221	4363426	-	Cbr-clec-218
1488	WBGene00024566	12.0116	-0.130819	0.420871	-0.310829	0.755931	0.851655	chrV	4359917	4361192	+	CBG01307
1489	WBGene00024567	20047.1	-0.216577	0.127041	-1.70478	0.088236	0.1883	chrV	4357066	4358592	-	CBG01308
1490	WBGene00024568	1.46735	0.210048	0.285689	0.735232	0.462198	NA	chrV	4356268	4356785	-	CBG01309
1491	WBGene00024569	0.35948	0.098241	0.172188	0.570544	0.568309	NA	chrV	4353700	4354749	+	CBG01310
1492	WBGene00024570	2.75372	0.305894	0.413194	0.740315	0.459109	0.622905	chrV	4348494	4349611	-	CBG01312
1493	WBGene00024571	20763.5	-0.120626	0.0721008	-1.67302	0.0943225	0.198308	chrV	4339935	4347737	-	Cbr-pygl-1
1495	WBGene00024572	7974.09	0.339092	0.0830713	4.08194	4.46616e-05	0.000335401	chrV	4338649	4339560	+	Cbr-rpl-11.1
1496	WBGene00024573	1261.24	0.28826	0.089566	3.21841	0.00128903	0.00606848	chrV	4334240	4338176	-	CBG01315
1497	WBGene00024574	22.4603	1.05835	0.347613	3.04464	0.0023296	0.0100436	chrV	4328707	4334227	+	Cbr-srh-213
1499	WBGene00024575	3.20664	0.50473	0.321962	1.56767	0.116958	0.233705	chrV	4326430	4327596	+	CBG01317
1500	WBGene00024576	47.9223	0.0928165	0.263164	0.352695	0.724317	0.83044	chrV	4324485	4325508	-	CBG01318
1501	WBGene00024577	0.202917	0.0587315	0.172057	0.34135	0.73284	NA	chrV	4319154	4320107	+	CBG01319
1502	WBGene00024579	2.08911	-0.0225125	0.365344	-0.0616199	0.950866	0.972736	chrV	4311843	4313066	-	CBG01322
1503	WBGene00024580	85.9236	1.41912	0.354825	3.99948	6.34806e-05	0.000455199	chrV	4309497	4311252	-	CBG01323
1504	WBGene00024581	3.37702	0.648386	0.348398	1.86105	0.0627373	0.145502	chrV	4306479	4308949	+	CBG01324
1505	WBGene00024582	98.842	1.35725	0.364651	3.72205	0.000197609	0.00122098	chrV	4304447	4306140	-	CBG01325
1506	WBGene00024583	0.54038	0.097363	0.23039	0.422602	0.672586	NA	chrV	4303657	4304400	+	CBG01326
1507	WBGene00024584	30.0728	-0.329964	0.311549	-1.05911	0.289552	0.454908	chrV	4298586	4299984	-	CBG01328
1508	WBGene00024585	8.72296	0.455835	0.427805	1.06552	0.28664	0.451629	chrV	4290506	4293741	-	CBG01330
1510	WBGene00024586	5.10556	0.112137	0.427983	0.262013	0.793312	0.876058	chrV	4285545	4288342	-	CBG01331
1511	WBGene00024588	2.10456	-0.0484175	0.364747	-0.132742	0.894397	0.940369	chrV	4280959	4281427	+	CBG01333
1512	WBGene00024589	0	NA	NA	NA	NA	NA	chrV	4277771	4279155	-	CBG01335
1513	WBGene00024590	0.624771	0.0450209	0.196852	0.228705	0.819098	NA	chrV	4276120	4277214	-	CBG01336
1514	WBGene00024591	84.0651	-0.482869	0.257084	-1.87826	0.060346	0.141006	chrV	4271377	4273311	-	CBG01337
1515	WBGene00024592	71.5581	-0.399875	0.282484	-1.41557	0.156901	0.291566	chrV	4267966	4271357	+	CBG01338
1516	WBGene00024593	903.984	0.135818	0.193631	0.701426	0.483037	0.644573	chrV	4265434	4267715	+	CBG01339
1520	WBGene00024594	1.31328	-0.212068	0.33541	-0.632265	0.527214	NA	chrV	4261592	4262439	+	CBG01340
1521	WBGene00024595	5.69744	0.310049	0.427716	0.724894	0.468517	0.631418	chrV	4255935	4257461	+	Cbr-nhr-222
1522	WBGene00024598	0.315446	-0.0651024	0.172323	-0.377794	0.705584	NA	chrV	4244683	4246092	-	CBG01345
1523	WBGene00024599	2.68008	0.473918	0.402783	1.17661	0.239352	0.397266	chrV	4243098	4244195	+	CBG01346
1524	WBGene00024600	1.34366	0.445647	0.329719	1.3516	0.176505	NA	chrV	4239984	4241518	-	CBG01347
1525	WBGene00024601	1.54541	0.613393	0.327773	1.8714	0.0612901	NA	chrV	4233818	4237094	-	CBG01348
1526	WBGene00024602	0.739101	0.219506	0.28174	0.77911	0.435915	NA	chrV	4232238	4233606	+	CBG01349
1527	WBGene00024603	0.906112	-0.026595	0.253224	-0.105026	0.916355	NA	chrV	4228851	4230210	+	CBG01350
1528	WBGene00024604	768.735	0.208406	0.145731	1.43007	0.152698	0.285797	chrV	4226426	4228506	+	CBG01351
1529	WBGene00024605	155.396	-0.603401	0.162739	-3.70777	0.000209088	0.0012782	chrV	4219028	4221804	-	CBG01352
1530	WBGene00024606	201.329	0.303548	0.209344	1.45	0.14706	0.277992	chrV	4214842	4216985	+	Cbr-nhr-55
1531	WBGene00024607	24.7217	0.883993	0.395772	2.23359	0.0255098	0.0715214	chrV	4212514	4213691	+	Cbr-nhr-99.2
1532	WBGene00024608	439.253	-0.22816	0.210775	-1.08248	0.279038	0.444021	chrV	4206565	4211204	+	CBG01355
1537	WBGene00024609	21.7075	1.64821	0.361993	4.55317	5.28442e-06	5.1722e-05	chrV	4201563	4203537	-	CBG01356
1539	WBGene00024610	700.53	0.232364	0.0874227	2.65793	0.00786211	0.0277581	chrV	4198363	4201474	+	CBG01357
1554	WBGene00024611	25.8219	0.844551	0.393735	2.14498	0.0319548	0.085559	chrV	4195967	4196910	-	Cbr-str-134
1555	WBGene00024612	149.283	0.229329	0.196847	1.16501	0.244014	0.403111	chrV	4193981	4195559	+	Cbr-nhr-99.1
1557	WBGene00024613	794.726	-0.0869635	0.175878	-0.494455	0.620985	0.753674	chrV	4191380	4192073	+	CBG01360
1559	WBGene00024614	0.752656	0.214556	0.282744	0.758837	0.44795	NA	chrV	4189501	4190934	-	Cbr-srh-33
1562	WBGene00024615	156.998	0.0712813	0.181005	0.393808	0.693723	0.808124	chrV	4186014	4189354	-	CBG01362
1563	WBGene00024616	390.951	0.214303	0.152058	1.40935	0.158732	0.294093	chrV	4174720	4178510	+	CBG01364
1565	WBGene00024617	273.616	0.100756	0.285695	0.352669	0.724336	0.83044	chrV	4170827	4173005	+	CBG01365
1566	WBGene00024618	400.864	0.217392	0.188049	1.15604	0.247664	0.407238	chrV	4165729	4166118	-	CBG01367
1567	WBGene00024619	1249.98	-0.170669	0.143495	-1.18937	0.234293	0.39154	chrV	4160691	4163241	+	Cbr-lipl-5
1568	WBGene00024620	18.8324	0.428404	0.368344	1.16305	0.244808	0.403959	chrV	4158506	4159857	+	CBG01371
1569	WBGene00024622	3.73906	0.166469	0.402339	0.413754	0.679054	0.796958	chrV	4152662	4154560	-	CBG01374
1570	WBGene00024623	568.858	-1.2513	0.274842	-4.5528	5.29367e-06	5.1768e-05	chrV	4149931	4151932	+	CBG01375
1571	WBGene00024624	15.5026	0.396636	0.387069	1.02472	0.305497	0.472363	chrV	4141667	4147438	-	Cbr-mltn-8
1572	WBGene00024625	90.8699	2.08617	0.218883	9.531	1.5577e-21	1.45933e-19	chrV	4131516	4136094	+	Cbr-mltn-6
1573	WBGene00024626	2535.84	0.256938	0.0980193	2.6213	0.00875947	0.0303432	chrV	4127237	4130189	+	CBG01378
1574	WBGene00024627	1868.62	0.788819	0.171877	4.58945	4.4441e-06	4.43392e-05	chrV	4119612	4127112	+	Cbr-atg-9
1575	WBGene00024628	3542.51	-0.0143098	0.0730182	-0.195976	0.844629	0.909769	chrV	4114865	4119278	+	Cbr-hrde-1
1577	WBGene00024629	47.8155	-0.0641127	0.264185	-0.242681	0.808252	0.885067	chrV	4099444	4102099	-	Cbr-dmd-8
1578	WBGene00024630	203.679	-0.33308	0.20208	-1.64826	0.0992991	0.206157	chrV	4095063	4097442	-	CBG01383
1579	WBGene00024631	3.60867	-0.460831	0.406151	-1.13463	0.256531	0.417676	chrV	4093153	4094610	-	Cbr-str-254
1581	WBGene00024632	49.6025	-0.262663	0.424576	-0.618647	0.536149	0.6884	chrV	4088784	4092972	+	CBG01385
1582	WBGene00024633	3.94871	0.205109	0.412155	0.497652	0.61873	0.752361	chrV	4086271	4088569	+	CBG01386
1583	WBGene00024634	1449.28	0.527613	0.238212	2.21489	0.0267677	0.0743224	chrV	4049105	4051111	+	CBG01387
1588	WBGene00024635	6.08543	-0.499964	0.425217	-1.17579	0.23968	0.39767	chrV	4079507	4080339	+	CBG01388
1589	WBGene00024636	4.04794	-0.0226959	0.415791	-0.0545848	0.956469	0.975445	chrV	4077470	4078248	-	CBG01389
1590	WBGene00024637	277.414	0.0528058	0.316738	0.166718	0.867592	0.922907	chrV	4072954	4074739	-	CBG01390
1595	WBGene00024638	370.898	0.127249	0.309445	0.411216	0.680914	0.798391	chrV	4070331	4072134	-	Cbr-cyp-35B2
1597	WBGene00024639	35.5526	-0.454993	0.301993	-1.50663	0.131904	0.255954	chrV	4067305	4069402	-	CBG01392
1601	WBGene00024640	60.5678	0.445032	0.266264	1.67139	0.0946437	0.198805	chrV	4065239	4065924	-	CBG01393
1602	WBGene00024642	262.097	0.445307	0.211454	2.10593	0.0352103	0.0922448	chrV	4057876	4061020	+	Cbr-nhr-16
1605	WBGene00024643	29.8895	2.13431	0.346737	6.15541	7.48827e-10	1.70276e-08	chrV	4051749	4053600	-	CBG01396
1610	WBGene00024644	1049.63	2.32903	0.251943	9.24426	2.36876e-20	2.05479e-18	chrV	4044578	4045702	-	CBG01397
1611	WBGene00024645	139.969	1.4145	0.363537	3.89093	9.98599e-05	0.000674991	chrV	4037705	4039633	-	CBG01398
1614	WBGene00024646	61.9105	1.10899	0.341486	3.24756	0.00116399	0.00557284	chrV	4040056	4041724	-	CBG01400
1616	WBGene00024647	2.47903	0.187265	0.361004	0.518734	0.603946	0.741264	chrV	4035699	4036587	+	CBG01401
1617	WBGene00024648	7.65246	0.0914228	0.416258	0.21963	0.826159	0.897325	chrV	4032387	4034565	-	CBG01402
1618	WBGene00024649	7.40209	-0.748721	0.424486	-1.76383	0.0777605	0.171049	chrV	4026644	4028017	-	CBG01403
1619	WBGene00024650	3026	-0.535206	0.0834892	-6.41048	1.45061e-10	3.81981e-09	chrV	4024983	4026054	-	CBG01404
1621	WBGene00024651	1702.95	-0.176725	0.122525	-1.44235	0.149203	0.281107	chrV	4022483	4023551	-	CBG01405
1623	WBGene00024652	757.398	-0.575788	0.27634	-2.08362	0.0371945	0.0963386	chrV	4020833	4021848	+	CBG01406
1624	WBGene00024653	1.43306	-0.265615	0.241007	-1.10211	0.270416	NA	chrV	4014912	4016170	+	CBG01407
1625	WBGene00024654	1.57987	-0.266404	0.329427	-0.80869	0.418693	NA	chrV	4011269	4012851	-	CBG01408
1626	WBGene00024655	0.17974	0.0587315	0.172057	0.34135	0.73284	NA	chrV	4004396	4005533	-	Cbr-tbx-35
1627	WBGene00024656	0.171277	-0.0223768	0.172057	-0.130055	0.896523	NA	chrV	4002501	4003761	-	CBG01411
1628	WBGene00024657	5.65732	-1.12078	0.426995	-2.62481	0.0086697	0.0300878	chrV	3992562	3993446	-	CBG01413
1629	WBGene00024658	0.202917	0.0587315	0.172057	0.34135	0.73284	NA	chrV	3986492	3987662	-	CBG01414
1633	WBGene00024659	0.198721	0.0587315	0.172057	0.34135	0.73284	NA	chrV	3983164	3984215	+	CBG01415
1634	WBGene00024660	0	NA	NA	NA	NA	NA	chrV	3981621	3982436	+	CBG01416
1635	WBGene00024661	0	NA	NA	NA	NA	NA	chrV	3980052	3981219	+	CBG01417
1636	WBGene00024662	5.08549	-0.145723	0.427985	-0.340486	0.733491	0.837094	chrV	3973589	3976780	-	CBG01418
1637	WBGene00024663	1.92973	-0.168107	0.369433	-0.45504	0.64908	0.774062	chrV	3967691	3971729	-	Cbr-srt-11
1638	WBGene00024664	0.588936	-0.0795107	0.236583	-0.33608	0.736811	NA	chrV	3965957	3967367	+	CBG01420
1643	WBGene00024665	0	NA	NA	NA	NA	NA	chrV	3963581	3964786	-	CBG01421
1647	WBGene00024666	6.00279	-0.271174	0.425989	-0.636576	0.524401	0.678666	chrV	3958549	3960401	-	Cbr-srt-13
1649	WBGene00024667	3.14342	-0.385277	0.407912	-0.94451	0.344909	0.51384	chrV	3946924	3950876	-	Cbr-srt-12
1650	WBGene00024668	0.99477	0.0821167	0.298493	0.275105	0.783236	NA	chrV	3942320	3943948	-	CBG01425
1651	WBGene00024669	1.26806	-0.0627277	0.345196	-0.181716	0.855805	NA	chrV	3939212	3941311	+	CBG01426
1652	WBGene00024670	187.604	-0.705891	0.178405	-3.95668	7.59992e-05	0.000533732	chrV	3933606	3935180	+	Cbr-nlp-13
1653	WBGene00024671	0.109469	-0.0223768	0.172057	-0.130055	0.896523	NA	chrV	3917101	3919605	-	CBG01430
1654	WBGene00024672	149.658	-0.461033	0.16802	-2.74391	0.00607117	0.0223181	chrV	3913536	3916457	+	Cbr-nlp-9
1655	WBGene00024673	1.02913	-0.0616927	0.260257	-0.237046	0.812621	NA	chrV	3909520	3910764	+	CBG01432
1656	WBGene00024676	802.96	0.123185	0.0811858	1.51732	0.129185	0.252061	chrV	3896187	3899209	+	CBG01435
1660	WBGene00024677	2607.57	0.128613	0.0861907	1.49219	0.135649	0.261352	chrV	3892438	3896077	+	Cbr-rpac-40
1661	WBGene00024679	1034.89	1.51148	0.0850855	17.7643	1.33617e-70	5.00718e-68	chrV	3877848	3886988	-	CBG01438
1662	WBGene00024680	1608.47	-0.72657	0.162992	-4.4577	8.28421e-06	7.70711e-05	chrV	3881238	3883821	+	Cbr-nhr-114
1663	WBGene00024682	472.032	0.037641	0.10933	0.344287	0.73063	0.834985	chrV	3865745	3877331	+	CBG01441
1664	WBGene00024683	321.722	-0.0267875	0.140315	-0.19091	0.848596	0.911967	chrV	3862621	3865754	-	CBG01442
1665	WBGene00024684	1.23123	0.346113	0.343884	1.00648	0.314184	NA	chrV	3859873	3860291	+	CBG01443
1667	WBGene00024685	0.37666	-0.0915829	0.174954	-0.523467	0.600649	NA	chrV	3857155	3857448	-	CBG01444
1668	WBGene00024686	8.67276	-0.139156	0.414098	-0.336046	0.736836	0.839583	chrV	3851593	3853938	+	CBG01445
1669	WBGene00024687	662.472	-0.331998	0.115477	-2.87501	0.00404009	0.0159636	chrV	3846129	3851184	-	CBG01446
1670	WBGene00024688	643.821	0.0481788	0.123798	0.389171	0.697149	0.81063	chrV	3840907	3845187	+	CBG01448
1671	WBGene00024689	3.62191	0.800159	0.421677	1.89757	0.0577533	0.136271	chrV	3833873	3834825	+	CBG01449
1672	WBGene00024691	5.98631	0.357532	0.427833	0.835681	0.403334	0.571612	chrV	1066584	1068820	+	CBG01451
1673	WBGene00024692	8.16697	0.590534	0.425269	1.38861	0.164951	0.302379	chrV	1071565	1073290	+	CBG01452
1674	WBGene00024693	21.2105	2.37207	0.38761	6.11974	9.37259e-10	2.09814e-08	chrV	1073820	1074756	-	CBG01453
1675	WBGene00024694	2653.17	-0.355412	0.204023	-1.74202	0.0815058	0.177228	chrV	1077279	1082988	-	CBG01454
1676	WBGene00024695	2697.68	-0.817902	0.224544	-3.6425	0.000270007	0.00158533	chrV	1108737	1110386	+	Cbr-asp-13
1677	WBGene00024696	29.4609	-1.0149	0.311027	-3.26306	0.00110216	0.00532227	chrV	1110585	1111241	+	CBG01463
1678	WBGene00024697	12.2759	-0.416013	0.399551	-1.0412	0.297782	0.463617	chrV	1112481	1113296	+	CBG01464
1679	WBGene00024698	56.3163	-0.833689	0.278937	-2.98881	0.00280071	0.011745	chrV	1115909	1119504	-	Cbr-acd-4
1680	WBGene00024699	16.583	-0.487834	0.420651	-1.15971	0.246166	0.405676	chrV	1120962	1121723	+	Cbr-grl-12
1681	WBGene00024700	19.0286	1.59935	0.428	3.7368	0.000186378	0.00115903	chrV	1121724	1123583	-	CBG01467
1682	WBGene00024701	194.276	-0.769124	0.196848	-3.9072	9.33716e-05	0.000641078	chrV	1125836	1128720	+	Cbr-oac-29
1683	WBGene00024702	1393.33	0.76459	0.171591	4.45589	8.35451e-06	7.76866e-05	chrV	1130559	1133363	+	Cbr-atg-18
1684	WBGene00024703	1066.16	0.111099	0.100477	1.10571	0.268851	0.432436	chrV	1133597	1136371	+	CBG01470
1686	WBGene00024704	143.102	-0.813997	0.176173	-4.62043	3.8294e-06	3.87846e-05	chrV	1136588	1138569	-	CBG01471
1687	WBGene00024705	12.2073	1.10508	0.428022	2.58182	0.00982804	0.0333481	chrV	1140838	1142494	+	CBG01472
1688	WBGene00024706	3524.22	0.30693	0.0726763	4.22325	2.40809e-05	0.000196261	chrV	1142476	1145083	-	Cbr-grd-5
1690	WBGene00024707	6246.67	-0.233302	0.0629349	-3.70703	0.000209701	0.00128111	chrV	1148421	1154626	-	Cbr-smk-1
1692	WBGene00024709	2380.55	0.748304	0.163012	4.59049	4.4221e-06	4.41433e-05	chrV	1156134	1157032	+	Cbr-vps-60
1693	WBGene00024710	582.327	0.194857	0.117374	1.66014	0.0968859	0.2022	chrV	1157033	1158499	-	CBG01477
1694	WBGene00024711	645.389	0.093875	0.133944	0.700853	0.483395	0.644674	chrV	1158693	1160441	-	CBG01478
1695	WBGene00024712	884.072	0.344471	0.0894353	3.85162	0.000117339	0.000775786	chrV	1162388	1163855	+	CBG01479
1697	WBGene00024713	1739.28	0.266714	0.10283	2.59373	0.00949408	0.0324322	chrV	1163859	1171032	-	CBG01480
1698	WBGene00024714	83.7377	0.358387	0.286415	1.25129	0.210829	0.36268	chrV	1166623	1168605	+	CBG01482
1699	WBGene00024715	441.717	-0.11835	0.123596	-0.957555	0.338287	0.507262	chrV	1184591	1190300	+	CBG01486
1700	WBGene00024717	569.946	0.272237	0.144563	1.88317	0.0596768	0.139709	chrV	1195456	1196956	-	CBG01488
1701	WBGene00024718	3925.19	0.0486881	0.0626219	0.777493	0.436868	0.602414	chrV	1196960	1202150	-	Cbr-symk-1
1702	WBGene00024719	3303.93	-0.351496	0.0707655	-4.96705	6.79804e-07	8.37992e-06	chrV	1202480	1207154	+	CBG01490
1703	WBGene00024720	163.597	-0.428972	0.191889	-2.23552	0.0253835	0.0712525	chrV	1207866	1212022	-	Cbr-acr-16
1704	WBGene00024721	265.882	-0.577775	0.141822	-4.07394	4.62239e-05	0.000345886	chrV	1219276	1222677	-	Cbr-acr-15
1705	WBGene00024722	269.484	-0.146201	0.212645	-0.687535	0.491746	0.652196	chrV	1224954	1227797	-	Cbr-asns-1
1706	WBGene00024723	358.269	-1.15725	0.301967	-3.83237	0.000126916	0.000831479	chrV	1228119	1235706	+	Cbr-slc-17.8
1708	WBGene00024724	5.31055	0.259796	0.428074	0.606895	0.54392	0.693672	chrV	1235697	1238275	-	Cbr-otpl-4
1709	WBGene00024725	23265.3	0.220834	0.111798	1.97529	0.0482356	0.118173	chrV	1239895	1240278	+	CBG01498
1710	WBGene00024726	11189.8	0.414454	0.112386	3.68776	0.000226236	0.00136697	chrV	1241125	1241535	-	CBG01499
1725	WBGene00024727	5531.19	-0.0299535	0.0881854	-0.339665	0.734108	0.837595	chrV	1241783	1242094	+	CBG01500
1726	WBGene00024728	7.16835	0.275575	0.424336	0.649427	0.516063	0.67233	chrV	1243191	1245358	+	CBG01502
1727	WBGene00024729	5365.07	-0.149278	0.116628	-1.27995	0.200561	0.350225	chrV	1248816	1249127	-	CBG01504
1728	WBGene00024730	11479.4	0.368261	0.149025	2.47113	0.0134685	0.0429402	chrV	1249359	1249916	+	Cbr-his-63
1743	WBGene00024731	504.358	0.471831	0.397452	1.18714	0.235172	0.392531	chrV	1250750	1251182	-	CBG01506
1744	WBGene00024732	6673.19	0.313616	0.0998425	3.14111	0.0016831	0.00764674	chrV	1251382	1251750	+	CBG01507
1747	WBGene00024733	5.3292	0.230399	0.425131	0.541948	0.587854	0.729639	chrV	1253052	1327413	+	CBG01508
1748	WBGene00024734	37.4449	-0.347279	0.291387	-1.19181	0.233335	0.390427	chrV	1255843	1259241	-	Cbr-otpl-5
1750	WBGene00024735	37.7265	0.337677	0.288407	1.17083	0.241665	0.400113	chrV	1260732	1264965	-	Cbr-otpl-6
1751	WBGene00024736	250.394	1.93413	0.215302	8.98334	2.62659e-19	2.04209e-17	chrV	1267016	1270773	-	Cbr-otpl-7
1752	WBGene00024737	149.007	0.541789	0.208293	2.60109	0.0092929	0.0318567	chrV	1271781	1273801	+	CBG01512
1753	WBGene00024738	5868.9	-0.0750701	0.0759653	-0.988215	0.323047	0.490832	chrV	1275563	1279739	+	CBG01513
1761	WBGene00024739	760.206	0.0756981	0.0931218	0.812893	0.41628	0.583776	chrV	1279832	1280707	+	CBG01514
1762	WBGene00024740	0.198721	0.0587315	0.172057	0.34135	0.73284	NA	chrV	1280995	1281573	-	CBG01515
1763	WBGene00024741	1.64758	0.295462	0.34878	0.847128	0.396924	NA	chrV	1282275	1282613	+	CBG01516
1764	WBGene00024742	432.771	0.255904	0.13071	1.9578	0.0502534	0.122127	chrV	1292964	1297694	+	CBG01517
1766	WBGene00024743	525.182	0.0111971	0.117142	0.0955856	0.92385	0.957531	chrV	1297702	1301867	-	CBG01518
1768	WBGene00024744	515.452	0.28802	0.161803	1.78007	0.0750651	0.166587	chrV	1302593	1303569	-	Cbr-dnj-22
1769	WBGene00024745	2538.71	-0.0617575	0.0672951	-0.917711	0.35877	0.528283	chrV	1303783	1307047	+	Cbr-natc-1
1771	WBGene00024746	1983.92	0.318812	0.0769727	4.14189	3.4446e-05	0.000267918	chrV	1307146	1308818	+	Cbr-mrps-2
1772	WBGene00024747	2566.47	0.00123378	0.0664744	0.0185602	0.985192	0.992008	chrV	1309553	1310721	+	Cbr-mrpl-4
1773	WBGene00024748	476.79	-0.165419	0.114709	-1.44207	0.149281	0.28117	chrV	1310701	1311780	+	Cbr-phf-30
1774	WBGene00024749	138.486	0.319978	0.207097	1.54506	0.122332	0.242017	chrV	1311863	1312456	-	CBG01524
1775	WBGene00024750	22.474	0.296695	0.36902	0.80401	0.421391	0.588084	chrV	1314082	1316900	-	CBG01525
1776	WBGene00024751	5042.31	-0.0530428	0.112558	-0.47125	0.637462	0.765649	chrV	1317961	1324679	+	Cbr-pxn-1
1777	WBGene00024752	49.5028	0.505474	0.313024	1.61481	0.106352	0.21726	chrV	1324801	1326310	-	CBG01527
1778	WBGene00024753	499.398	-1.09508	0.254237	-4.30735	1.65225e-05	0.000141427	chrV	1328893	1331968	+	Cbr-cln-3.3
1779	WBGene00024754	39.8013	-0.905656	0.341627	-2.65101	0.00802513	0.0282538	chrV	1331899	1333761	-	CBG01529
1780	WBGene00024756	800.487	-0.8	0.126176	-6.34036	2.29226e-10	5.81193e-09	chrV	1335258	1346504	-	Cbr-glr-5
1781	WBGene00024757	22.4074	-0.63603	0.381343	-1.66787	0.0953419	0.199868	chrV	1339004	1340454	+	CBG01532
1788	WBGene00024758	14.3837	0.582006	0.390276	1.49127	0.135891	0.261664	chrV	1347766	1354764	+	CBG01534
1789	WBGene00024762	10239.7	-0.625267	0.0994761	-6.2856	3.26593e-10	7.99919e-09	chrIV	11400202	11418337	-	Cbr-sax-7
1791	WBGene00024763	380.713	-0.999759	0.204389	-4.89145	1.00094e-06	1.17584e-05	chrIV	11397589	11400120	+	Cbr-nsy-7
1793	WBGene00024764	22.2138	1.70579	0.412761	4.13264	3.58615e-05	0.000276814	chrIV	11383736	11385510	+	Cbr-irld-8
1794	WBGene00024765	118.172	-1.16597	0.199046	-5.85781	4.69019e-09	9.15418e-08	chrIV	11380764	11382528	-	CBG01542
1795	WBGene00024766	1021.85	-0.211806	0.089696	-2.36137	0.0182075	0.0547422	chrIV	11377126	11382636	+	Cbr-rabs-5
1798	WBGene00024767	1186.68	-0.0160792	0.121274	-0.132586	0.894521	0.940369	chrIV	11374246	11377125	+	CBG01544
1799	WBGene00024768	1564.66	-0.0849378	0.0785736	-1.081	0.279698	0.444618	chrIV	11371165	11373082	-	CBG01545
1800	WBGene00024769	177.014	-0.0988433	0.159363	-0.620242	0.535099	0.687485	chrIV	11369338	11373093	+	Cbr-erp-44.3
1801	WBGene00024770	0	NA	NA	NA	NA	NA	chrIV	11365965	11367281	-	CBG01547
1802	WBGene00024771	5667.81	0.299787	0.0593006	5.05537	4.29548e-07	5.55831e-06	chrIV	11365004	11367446	+	CBG01548
1803	WBGene00024772	651.491	-0.368423	0.101874	-3.61645	0.000298673	0.00173258	chrIV	11362148	11364726	-	Cbr-moc-3
1804	WBGene00024773	4366.14	0.394863	0.0798911	4.94252	7.71207e-07	9.35888e-06	chrIV	11359935	11362139	+	Cbr-sph-1
1806	WBGene00024774	16194.6	0.326745	0.0514674	6.34858	2.17317e-10	5.53243e-09	chrIV	11358806	11360275	+	Cbr-isp-1
1807	WBGene00024775	505.987	-0.0430355	0.115562	-0.372401	0.709594	0.820116	chrIV	11355927	11358523	-	Cbr-islo-1
1808	WBGene00024776	387.932	-0.17904	0.147672	-1.21241	0.225354	0.381125	chrIV	11352018	11355853	-	Cbr-pmk-3
1809	WBGene00024777	479.927	-0.313524	0.100726	-3.11265	0.00185415	0.0082974	chrIV	11338861	11343701	-	Cbr-pmk-2
1810	WBGene00024778	1752.59	-0.00856633	0.0799008	-0.107212	0.914621	0.952069	chrIV	11336603	11338761	-	Cbr-pmk-1
1811	WBGene00024779	4767.91	2.08405	0.253335	8.22646	1.92834e-16	1.18076e-14	chrIV	11332761	11334866	-	Cbr-faah-2
1812	WBGene00024780	5928.07	-0.310002	0.117734	-2.63308	0.00846137	0.0294675	chrIV	11327089	11329673	-	Cbr-faah-1
1813	WBGene00024781	2191.91	0.0955063	0.087843	1.08724	0.276932	0.441995	chrIV	11325388	11326607	+	Cbr-clec-51
1814	WBGene00024782	1525.09	-0.830552	0.114251	-7.26954	3.60718e-13	1.45844e-11	chrIV	11306414	11317048	-	Cbr-pct-1
1816	WBGene00024783	1515.09	0.0554902	0.0809706	0.685313	0.493147	0.653399	chrIV	11296229	11306052	+	Cbr-wsp-1
1818	WBGene00024785	726.999	0.0572842	0.0889607	0.643927	0.519623	0.675355	chrIV	11294475	11295192	+	Cbr-glrx-22
1819	WBGene00024786	2105.84	0.112703	0.12268	0.918671	0.358268	0.527824	chrIV	11291777	11294488	+	Cbr-hgrs-1
1820	WBGene00024787	1805.2	0.0305386	0.0918898	0.332339	0.739633	0.841144	chrIV	11285323	11290875	-	Cbr-klp-19
1822	WBGene00024789	5.03845	-0.776522	0.427302	-1.81727	0.069176	0.156578	chrIV	11280044	11281026	+	CBG01570
1823	WBGene00024790	227.882	-1.44273	0.175492	-8.22101	2.01795e-16	1.23161e-14	chrIV	11278276	11284698	-	Cbr-svh-1
1824	WBGene00024791	352.254	-0.55522	0.148722	-3.73326	0.000189017	0.00117272	chrIV	11273274	11278214	+	Cbr-ocr-2
1825	WBGene00024792	1783.28	-0.613933	0.0957716	-6.41039	1.45151e-10	3.81981e-09	chrIV	11248856	11257688	-	Cbr-nhr-66
1827	WBGene00024793	433.624	0.43282	0.107707	4.01851	5.85664e-05	0.0004232	chrIV	11248095	11248908	+	CBG01575
1828	WBGene00024794	281.368	0.378574	0.196771	1.92394	0.0543626	0.129908	chrIV	11247196	11248094	+	Cbr-gpx-6
1829	WBGene00024796	91.4049	-0.185473	0.227961	-0.813616	0.415865	0.583325	chrIV	11238477	11243808	-	Cbr-vit-6
1831	WBGene00024797	49.2984	-0.961591	0.382331	-2.51508	0.0119006	0.0389283	chrIV	11235572	11238027	+	CBG01579
1832	WBGene00024798	27.4585	-0.839074	0.319383	-2.62717	0.00860972	0.0299296	chrIV	11231114	11234317	+	CBG01580
1833	WBGene00024799	95.1708	0.208046	0.252524	0.823868	0.410015	0.577758	chrIV	11229423	11230813	+	CBG01581
1834	WBGene00024800	16.7621	0.102087	0.374016	0.272949	0.784892	0.870796	chrIV	11219971	11221062	+	CBG01583
1835	WBGene00024801	25793.2	-0.201708	0.120708	-1.67104	0.0947146	0.198931	chrIV	11211388	11214525	+	CBG01584
1836	WBGene00024802	2352.52	0.326416	0.0689471	4.73431	2.19807e-06	2.36832e-05	chrIV	11210280	11211405	-	Cbr-daf-31
1837	WBGene00024803	1272.07	0.0497173	0.0946993	0.525001	0.599582	0.737841	chrIV	11207578	11210179	-	CBG01586
1841	WBGene00024804	949.908	0.203994	0.12863	1.5859	0.112763	0.22726	chrIV	11205717	11207470	-	Cbr-tbce-1
1842	WBGene00024805	623.888	0.0316905	0.100707	0.314682	0.753003	0.84989	chrIV	11203783	11205600	-	Cbr-nprl-3
1843	WBGene00024806	361.783	0.285893	0.178627	1.6005	0.109487	0.222043	chrIV	11202905	11203618	-	CBG01589
1844	WBGene00024807	31.2826	0.0635174	0.317448	0.200088	0.841412	0.907892	chrIV	11202386	11202771	-	CBG01590
1845	WBGene00024808	19371.3	0.173104	0.0584123	2.96349	0.0030417	0.0125696	chrIV	11193953	11197147	-	Cbr-vha-5
1846	WBGene00024809	6649.78	-0.145573	0.071385	-2.03926	0.0414237	0.104851	chrIV	11188277	11193952	+	CBG01593
1847	WBGene00024810	2.15422	0.0533654	0.315393	0.169203	0.865637	0.921507	chrIV	11169973	11172459	+	CBG01596
1848	WBGene00024811	223.574	-0.192207	0.14736	-1.30433	0.19212	0.339055	chrIV	11176213	11177604	-	CBG01597
1849	WBGene00024812	61.7578	-0.684163	0.239471	-2.85698	0.0042769	0.016709	chrIV	11172749	11173468	-	CBG01598
1850	WBGene00024814	1.95955	0.556701	0.366828	1.51761	0.129113	0.251947	chrIV	11167631	11169233	+	CBG01600
1851	WBGene00024815	17.4405	-0.610067	0.36421	-1.67504	0.093926	0.197674	chrIV	11165898	11167457	+	Cbr-str-81
1852	WBGene00024816	2.79474	0.120138	0.384398	0.312535	0.754634	0.85109	chrIV	11162574	11164580	-	Cbr-lgc-6
1854	WBGene00024817	1537.02	-0.222894	0.0854624	-2.6081	0.00910467	0.0313708	chrIV	11157129	11160057	-	CBG01603
1856	WBGene00024818	44.9353	-0.0454171	0.262517	-0.173006	0.862647	0.919839	chrIV	11153803	11156944	-	CBG01604
1857	WBGene00024819	9.30546	-0.682095	0.418183	-1.63109	0.102871	0.211975	chrIV	11150884	11152560	-	CBG01605
1858	WBGene00024820	603.82	-0.424949	0.160538	-2.64703	0.0081202	0.0285247	chrIV	11147854	11150772	+	Cbr-asm-3
1859	WBGene00024821	89.3543	-0.228381	0.22267	-1.02565	0.305057	0.471722	chrIV	11144037	11146856	-	Cbr-glt-7
1861	WBGene00024823	134.003	-0.507422	0.229393	-2.21202	0.0269652	0.0747408	chrIV	11128007	11140989	-	CBG01609
1865	WBGene00024824	150.492	-1.22148	0.300998	-4.05809	4.94748e-05	0.000367423	chrIV	11116246	11123698	-	Cbr-efn-4
1866	WBGene00024825	734.308	0.0246266	0.0998484	0.24664	0.805187	0.883353	chrIV	11114622	11116245	+	CBG01611
1867	WBGene00024826	4317.96	-0.179176	0.0676896	-2.64703	0.00812033	0.0285247	chrIV	11108360	11114420	-	Cbr-gex-2
1868	WBGene00024827	60.0386	0.102278	0.335678	0.30469	0.760602	0.854989	chrIV	11108751	11110538	+	CBG01613
1869	WBGene00024828	159.38	-0.184548	0.160596	-1.14915	0.250496	0.41031	chrIV	11106811	11108213	-	Cbr-mesp-1.3
1871	WBGene00024829	498.009	0.19051	0.154894	1.22994	0.218718	0.372556	chrIV	11103257	11106347	-	Cbr-pig-1
1872	WBGene00024830	106.822	0.90378	0.243011	3.71909	0.000199942	0.00123356	chrIV	11101226	11103169	-	CBG01616
1873	WBGene00024831	179.735	-0.398891	0.210751	-1.89271	0.0583962	0.137441	chrIV	11072458	11083966	-	CBG01619
1874	WBGene00024832	724.163	0.166824	0.14569	1.14506	0.252184	0.412439	chrIV	11071454	11083975	+	CBG01620
1875	WBGene00024833	3.65047	0.219731	0.416744	0.527256	0.598016	0.736542	chrIV	11070251	11070872	+	CBG01621
1876	WBGene00024834	155.021	-0.904689	0.315957	-2.86333	0.00419212	0.0164416	chrIV	11067857	11069672	+	Cbr-zip-11
1877	WBGene00024835	15.7356	0.53958	0.397981	1.35579	0.175165	0.316404	chrIV	11064420	11064909	+	CBG01624
1878	WBGene00024836	45.8649	0.721859	0.418129	1.7264	0.0842748	0.181797	chrIV	11060843	11061427	+	CBG01626
1881	WBGene00024837	22.8291	0.487409	0.424947	1.14699	0.251387	0.411483	chrIV	11059295	11059821	+	CBG01627
1884	WBGene00024838	6.6935	0.17111	0.425137	0.402482	0.68733	0.803099	chrIV	11057087	11058151	+	CBG01628
1885	WBGene00024839	9176.4	0.0375564	0.0561283	0.669118	0.50342	0.662215	chrIV	11054380	11055890	+	CBG01629
1886	WBGene00024840	15014.9	0.0320225	0.0553151	0.578911	0.562649	0.709398	chrIV	11051255	11052571	-	CBG01630
1887	WBGene00024841	241.571	0.236002	0.154315	1.52935	0.126177	0.247584	chrIV	11044521	11049159	-	Cbr-gcy-23
1888	WBGene00024842	61.7783	-1.21609	0.250287	-4.85878	1.18113e-06	1.36209e-05	chrIV	11036394	11038642	-	CBG01632
1889	WBGene00024843	117.496	-0.66788	0.197701	-3.37824	0.000729522	0.00374495	chrIV	11029471	11036418	+	CBG01633
1891	WBGene00024844	447.287	0.162692	0.274364	0.592981	0.553194	0.701564	chrIV	11034945	11035474	-	CBG01634
1892	WBGene00024845	172.751	-0.402422	0.310731	-1.29508	0.195293	0.343265	chrIV	11025150	11027322	-	Cbr-lgc-22
1893	WBGene00024846	613.51	-0.0935765	0.130036	-0.719619	0.47176	0.634453	chrIV	11021056	11024595	-	Cbr-trpl-2
1894	WBGene00024847	191.454	-0.0161593	0.163141	-0.099051	0.921098	0.955838	chrIV	11017427	11020532	-	CBG01638
1895	WBGene00024848	7629.42	-0.200644	0.0642137	-3.12463	0.00178031	0.00802059	chrIV	11008841	11017450	+	CBG01639
1901	WBGene00024849	90.7016	-0.713106	0.245512	-2.90457	0.00367758	0.0147583	chrIV	11014112	11015342	-	CBG01640
1903	WBGene00024850	59.9827	0.0631847	0.289056	0.21859	0.826969	0.897788	chrIV	10986212	10988918	+	Cbr-scl-23
1905	WBGene00024851	2147.55	-0.404162	0.0780957	-5.17522	2.27643e-07	3.13168e-06	chrIV	10973344	10985377	-	Cbr-tpa-1
1907	WBGene00024852	753.361	-0.0822713	0.0993331	-0.828236	0.407537	0.575672	chrIV	10967452	10969904	+	Cbr-tut-1
1908	WBGene00024853	2221.56	0.259838	0.15636	1.66179	0.0965541	0.201777	chrIV	10965043	10967362	+	Cbr-grld-1
1909	WBGene00024854	9814.19	0.289055	0.050139	5.76508	8.1618e-09	1.50371e-07	chrIV	10964093	10964644	-	Cbr-cox-6C
1910	WBGene00024855	3389.63	-0.438734	0.166462	-2.63564	0.00839777	0.0293015	chrIV	10953010	10956727	-	Cbr-daf-1
1911	WBGene00024856	939.747	-0.441688	0.175772	-2.51284	0.0119762	0.0391416	chrIV	10945433	10953009	+	Cbr-col-99
1923	WBGene00024857	1.37103	0.296835	0.281519	1.05441	0.291697	NA	chrIV	10930345	10931216	-	CBG01653
1924	WBGene00024858	135.492	-0.582685	0.211137	-2.75975	0.00578455	0.0214879	chrIV	10929118	10930344	+	CBG01654
1925	WBGene00024859	1.77151	0.637389	0.331897	1.92044	0.0548019	0.130722	chrIV	10926836	10927889	-	CBG01655
1926	WBGene00024860	3.77446	0.795516	0.369157	2.15495	0.0311655	0.0839899	chrIV	10922676	10926070	+	Cbr-catp-4
1927	WBGene00024861	0.397442	0.098241	0.172188	0.570544	0.568309	NA	chrIV	10921615	10922245	-	CBG01657
1929	WBGene00024862	216.183	-1.09058	0.160541	-6.79316	1.09703e-11	3.56239e-10	chrIV	10916935	10920938	-	Cbr-cutl-24
1930	WBGene00024863	470.443	-0.719243	0.136594	-5.26554	1.39774e-07	2.00379e-06	chrIV	10908824	10910896	-	Cbr-tcl-2
1931	WBGene00024864	581.117	-0.654958	0.103903	-6.30353	2.90946e-10	7.2014e-09	chrIV	10905494	10908777	-	Cbr-pnc-1
1933	WBGene00024865	1785.78	0.270505	0.102886	2.62918	0.00855914	0.0297648	chrIV	10901968	10903986	-	Cbr-csn-3
1935	WBGene00024866	47.1827	-0.0927876	0.313857	-0.295637	0.767507	0.859992	chrIV	10901405	10901711	-	Cbr-gfrp-1
1936	WBGene00024867	1150.34	-0.534977	0.101737	-5.25845	1.45274e-07	2.07944e-06	chrIV	10897092	10900442	-	CBG01664
1937	WBGene00024868	1324.91	-0.0207563	0.111349	-0.186407	0.852125	0.913768	chrIV	10893247	10897090	+	Cbr-cogc-8
1938	WBGene00024869	1651.17	0.219667	0.0693125	3.16923	0.00152844	0.00702954	chrIV	10891698	10893258	-	Cbr-fnta-1
1939	WBGene00024870	1200.58	-0.212512	0.0911247	-2.3321	0.0196952	0.0581607	chrIV	10888650	10891597	-	CBG01667
1940	WBGene00024871	735.444	-0.36465	0.0984404	-3.70427	0.000212001	0.00129306	chrIV	10885167	10887163	-	CBG01668
1941	WBGene00024872	1204.27	0.0911141	0.0770989	1.18178	0.237292	0.394932	chrIV	10883334	10885066	-	Cbr-sars-2
1942	WBGene00024873	951.403	0.0985034	0.105908	0.930084	0.352328	0.522069	chrIV	10877313	10882128	-	Cbr-cbd-1.2
1943	WBGene00024875	23728.4	-0.445753	0.0985364	-4.52374	6.07554e-06	5.82587e-05	chrIV	10858101	10872409	-	CBG01673
1944	WBGene00024876	9722.12	0.181828	0.068982	2.63588	0.00839203	0.0292869	chrIV	10856461	10857980	-	Cbr-tald-1
1945	WBGene00024877	81406.4	0.292094	0.0709996	4.11402	3.8882e-05	0.000297117	chrIV	10853345	10854745	+	Cbr-rpl-7A
1946	WBGene00024878	634.097	-0.45245	0.106036	-4.26696	1.98151e-05	0.000165748	chrIV	10850540	10852739	-	Cbr-set-21
1947	WBGene00024879	2423.23	0.229107	0.0897632	2.55235	0.0106999	0.035724	chrIV	10835907	10849607	-	Cbr-ell-1
1948	WBGene00024880	6.32785	0.338857	0.425075	0.797169	0.425353	0.591937	chrIV	10832159	10833846	+	Cbr-str-185
1949	WBGene00024881	271.021	-0.141205	0.158286	-0.892091	0.372344	0.542505	chrIV	10826254	10831379	-	Cbr-msh-5
1950	WBGene00024882	13.8524	-0.286142	0.395878	-0.722804	0.4698	0.632649	chrIV	10820567	10823520	-	CBG01683
1951	WBGene00024883	1669.23	0.586495	0.219657	2.67005	0.00758399	0.0269131	chrIV	10810932	10818309	-	CBG01684
1954	WBGene00024884	8.45415	0.256423	0.424133	0.604583	0.545456	0.695064	chrIV	10808658	10810942	+	CBG01685
1955	WBGene00024885	15.7189	0.556172	0.392339	1.41758	0.156313	0.290762	chrIV	10803036	10804980	-	CBG01687
1956	WBGene00024886	172.306	-0.144801	0.170689	-0.848331	0.396254	0.56491	chrIV	10795426	10802741	+	CBG01688
1957	WBGene00024887	1790.46	0.149016	0.121165	1.22985	0.218752	0.37258	chrIV	10793128	10795212	+	Cbr-chat-1
1958	WBGene00024888	2634.67	-0.136904	0.0674122	-2.03085	0.0422701	0.106425	chrIV	10791705	10792898	+	Cbr-htz-1
1960	WBGene00024889	2032.05	-0.38047	0.0706577	-5.38469	7.2568e-08	1.11726e-06	chrIV	10788759	10791623	-	Cbr-wapl-1
1961	WBGene00024890	326.417	0.515842	0.216829	2.37903	0.0173584	0.05262	chrIV	10787102	10787856	+	CBG01693
1962	WBGene00024891	456.247	-0.264375	0.154791	-1.70795	0.0876456	0.187429	chrIV	10780722	10781620	-	Cbr-trx-3
1963	WBGene00024892	164.912	-0.511145	0.160007	-3.19452	0.00140062	0.00653307	chrIV	10776841	10780243	-	CBG01697
1964	WBGene00024894	2146.82	-0.994879	0.217156	-4.58141	4.6186e-06	4.59335e-05	chrIV	10769609	10781637	+	Cbr-gbb-2
1970	WBGene00024895	626.681	-0.211813	0.0993001	-2.13306	0.0329202	0.0876298	chrIV	10766549	10769317	+	CBG01700
1971	WBGene00024896	4761.57	0.122385	0.0606754	2.01704	0.0436917	0.109299	chrIV	10764789	10766543	+	Cbr-sar-1
1972	WBGene00024897	1176.18	0.422579	0.412929	1.02337	0.306134	0.472694	chrIV	10761426	10763677	+	CBG01702
1975	WBGene00024898	143.298	0.554585	0.39048	1.42026	0.155531	0.289622	chrIV	10753916	10758217	+	CBG01703
1976	WBGene00024899	54.9734	-0.982107	0.271867	-3.61246	0.000303309	0.00175567	chrIV	10746675	10748531	+	CBG01704
1977	WBGene00024900	365.954	-0.451722	0.164184	-2.75131	0.00593579	0.0219262	chrIV	10736440	10741662	-	CBG01705
1979	WBGene00024901	212.424	0.110634	0.176844	0.625602	0.531576	0.685016	chrIV	10732777	10736396	+	CBG01706
1980	WBGene00024902	149.084	-0.0529247	0.170057	-0.311219	0.755635	0.851566	chrIV	10729290	10729927	-	CBG01707
1981	WBGene00024903	194.411	-0.524248	0.159665	-3.28342	0.00102556	0.00500412	chrIV	10717162	10722005	+	CBG01708
1983	WBGene00024904	2683	-0.372588	0.0889213	-4.19009	2.78849e-05	0.000222427	chrIV	10705955	10714810	-	CBG01709
1984	WBGene00024905	8740.33	-0.259112	0.143214	-1.80926	0.0704111	0.158683	chrIV	10702903	10705954	-	CBG01710
1987	WBGene00024906	10882.7	-0.167481	0.102532	-1.63345	0.102374	0.21109	chrIV	10701051	10702769	-	CBG01711
1988	WBGene00024907	32.2295	0.281241	0.344391	0.816632	0.414139	0.581731	chrIV	10699710	10701064	+	Cbr-col-110
1989	WBGene00024909	243.029	-0.517076	0.140436	-3.68194	0.000231467	0.00139274	chrIV	10682114	10699706	+	CBG01714
1993	WBGene00024910	343.946	-0.201013	0.132421	-1.51799	0.129018	0.251817	chrIV	10672094	10673786	-	CBG01718
1994	WBGene00024911	17.8595	0.37942	0.370475	1.02414	0.305767	0.472399	chrIV	10671283	10672071	-	CBG01719
1995	WBGene00024912	1444.84	0.131945	0.0709039	1.86089	0.0627591	0.145534	chrIV	10669978	10670675	-	Cbr-ubc-9
1996	WBGene00024913	216.26	0.750495	0.164906	4.55105	5.33786e-06	5.20914e-05	chrIV	10668828	10669433	-	CBG01721
1997	WBGene00024914	642.023	0.244125	0.12837	1.90173	0.0572062	0.13522	chrIV	10666949	10668670	-	Cbr-psr-1
1998	WBGene00024915	173.253	0.431464	0.278108	1.55142	0.1208	0.239694	chrIV	10665935	10667021	+	Cbr-col-111
1999	WBGene00024916	905.568	-0.326426	0.0987361	-3.30604	0.000946237	0.00466815	chrIV	10662935	10663419	+	Cbr-mrps-21
2000	WBGene00024917	7203.74	0.099189	0.0689372	1.43883	0.150198	0.282302	chrIV	10662170	10662905	+	CBG01726
2001	WBGene00024918	2047.19	-0.101246	0.0942573	-1.07414	0.28276	0.447884	chrIV	10659171	10661775	-	Cbr-jmjd-1.2
2003	WBGene00024919	577.157	0.353071	0.108503	3.25402	0.00113783	0.00546516	chrIV	10657449	10658849	-	CBG01728
2005	WBGene00024920	50.6303	-0.696013	0.260196	-2.67496	0.0074738	0.026628	chrIV	10653263	10656010	-	CBG01729
2006	WBGene00024922	3493.73	0.121145	0.0752376	1.61016	0.107362	0.218758	chrIV	10642242	10646648	-	CBG01733
2008	WBGene00024923	189.78	-1.10799	0.195206	-5.67601	1.37874e-08	2.45565e-07	chrIV	10637706	10640285	-	Cbr-bus-4
2009	WBGene00024924	6.09168	1.14702	0.396676	2.89158	0.00383305	0.0153069	chrIV	10633649	10634797	+	CBG01735
2010	WBGene00024925	24.9104	0.96875	0.410814	2.35813	0.0183675	0.0550996	chrIV	10631475	10633533	-	CBG01736
2011	WBGene00024926	21464.5	-0.254413	0.0920329	-2.76437	0.00570328	0.0212197	chrIV	10627752	10631499	+	Cbr-ogdh-1
2012	WBGene00024927	8298.31	0.0108345	0.0555332	0.195099	0.845315	0.910112	chrIV	10624996	10626490	+	Cbr-cif-1
2013	WBGene00024928	1652.55	0.0155468	0.0799573	0.194438	0.845833	0.910389	chrIV	10619652	10622136	+	Cbr-miro-1
2014	WBGene00024929	2774.27	-0.294629	0.125893	-2.34031	0.0192678	0.0572171	chrIV	10615609	10618930	+	Cbr-hoe-1
2015	WBGene00024930	6742.08	0.482353	0.0758111	6.36257	1.98408e-10	5.09954e-09	chrIV	10614632	10615628	+	Cbr-timm-17B.1
2016	WBGene00024931	78.8825	0.549059	0.219763	2.49842	0.0124749	0.0404539	chrIV	10612324	10614028	+	Cbr-tctn-1
2017	WBGene00024932	33405.9	0.219656	0.0584702	3.75672	0.000172152	0.00108133	chrIV	10610906	10612332	+	Cbr-cyc-2.1
2019	WBGene00024933	51280.8	0.334149	0.0689852	4.84377	1.27397e-06	1.45957e-05	chrIV	10609893	10610870	+	Cbr-rpl-20
2020	WBGene00024934	673.823	-0.0799438	0.104838	-0.762544	0.445735	0.611178	chrIV	10607995	10609179	-	CBG01746
2021	WBGene00024935	610.431	0.103277	0.110103	0.937999	0.348245	0.517492	chrIV	10606121	10607993	+	CBG01747
2022	WBGene00024936	9.85088	0.420134	0.42797	0.981689	0.326253	0.494499	chrIV	10603661	10604989	-	CBG01748
2023	WBGene00024937	90.4672	-0.211417	0.217114	-0.973762	0.330175	0.498629	chrIV	10599225	10603431	-	CBG01749
2024	WBGene00024938	570.671	-0.263043	0.115956	-2.26848	0.0233002	0.0665168	chrIV	10595026	10598907	+	Cbr-set-15
2025	WBGene00024939	8.77242	-0.671739	0.424203	-1.58353	0.113301	0.228007	chrIV	10588596	10590131	+	Cbr-srd-10
2026	WBGene00024940	1322.95	-0.765361	0.0889583	-8.60359	7.72589e-18	5.38141e-16	chrIV	10577359	10587873	+	Cbr-qui-1
2027	WBGene00024941	4057.62	0.018771	0.0820258	0.228843	0.818991	0.8928	chrIV	10568005	10577125	-	CBG01754
2028	WBGene00024942	3321.01	-0.142294	0.0814905	-1.74614	0.0807872	0.176191	chrIV	10559530	10566411	-	Cbr-rsd-2
2029	WBGene00024943	1008.22	-0.0750617	0.0812766	-0.923534	0.355729	0.525572	chrIV	10556639	10559225	-	Cbr-dcap-2
2030	WBGene00024945	373.77	-0.19191	0.133236	-1.44038	0.149761	0.281705	chrIV	10553329	10556411	+	Cbr-afmd-2
2031	WBGene00024946	348.051	-0.0768054	0.114116	-0.673049	0.500916	0.660086	chrIV	10551589	10553292	+	Cbr-seld-1
2033	WBGene00024947	445.773	-0.37294	0.139029	-2.68247	0.00730817	0.0261123	chrIV	10550714	10551349	-	Cbr-nlp-17
2034	WBGene00024948	2273.86	-0.0794109	0.0697309	-1.13882	0.254778	0.415617	chrIV	10537653	10548047	-	Cbr-tbc-9
2035	WBGene00024949	306.871	-0.0573838	0.137271	-0.418034	0.675922	0.794327	chrIV	10543573	10546326	+	CBG01762
2036	WBGene00024950	152.696	-0.849246	0.295359	-2.8753	0.00403639	0.0159557	chrIV	10539895	10541055	+	CBG01763
2037	WBGene00024951	17.7478	-0.105043	0.3745	-0.280489	0.779102	0.867434	chrIV	10535072	10537606	+	Cbr-fezf-1
2038	WBGene00024952	3384.42	-0.357985	0.061501	-5.82079	5.85686e-09	1.11185e-07	chrIV	10529636	10533664	-	Cbr-uso-1
2039	WBGene00024953	73.952	0.105429	0.372006	0.283406	0.776866	0.865973	chrIV	10523796	10529536	-	Cbr-mam-3
2040	WBGene00024954	0	NA	NA	NA	NA	NA	chrIV	10522466	10522693	-	CBG01767
2041	WBGene00024955	27.5509	1.13949	0.336327	3.38804	0.000703932	0.00363449	chrIV	10520052	10520619	+	CBG01768
2042	WBGene00024956	1157	-0.0031105	0.0754465	-0.0412279	0.967114	0.98145	chrIV	10517258	10519969	+	Cbr-nol-9
2043	WBGene00024957	593.202	0.055737	0.11048	0.504499	0.613911	0.748981	chrIV	10515274	10517123	+	Cbr-pik-1
2044	WBGene00024958	770.239	0.389026	0.156195	2.49065	0.012751	0.0411215	chrIV	10512994	10514734	-	Cbr-gcl-1
2046	WBGene00024959	72.1413	0.363499	0.240219	1.5132	0.130229	0.253596	chrIV	10511538	10512822	-	CBG01772
2047	WBGene00024960	60.4036	0.159524	0.275645	0.578731	0.562771	0.709455	chrIV	10509651	10511537	+	Cbr-cyp-31A2
2050	WBGene00024961	74.5341	-0.0183351	0.238903	-0.0767469	0.938825	0.966316	chrIV	10506590	10508794	-	Cbr-puf-3
2052	WBGene00024962	1771.48	-0.805892	0.193389	-4.16721	3.08346e-05	0.000243365	chrIV	10501141	10505263	-	CBG01775
2053	WBGene00024963	728.785	0.0774984	0.0937806	0.82638	0.408589	0.576399	chrIV	10500346	10500967	+	Cbr-lsm-3
2054	WBGene00024964	892.164	-0.16224	0.0881269	-1.84099	0.0656237	0.150207	chrIV	10499634	10500176	+	Cbr-mdt-9
2055	WBGene00024965	346.282	0.121879	0.138442	0.88036	0.378664	0.548614	chrIV	10497994	10498797	-	Cbr-rab-19
2056	WBGene00024966	1996.3	-0.0527995	0.0746347	-0.707439	0.479294	0.641462	chrIV	10495817	10496684	-	Cbr-emc-3
2057	WBGene00024967	590.946	-0.146696	0.0944889	-1.55252	0.120537	0.239273	chrIV	10494683	10495816	+	Cbr-mau-8
2058	WBGene00024968	1678.48	-0.0279012	0.0661776	-0.421611	0.673309	0.7924	chrIV	10492432	10494585	+	CBG01781
2059	WBGene00024969	407.425	-0.166383	0.125445	-1.32634	0.184728	0.329204	chrIV	10491449	10491811	+	CBG01782
2060	WBGene00024970	32150.6	0.369348	0.0712524	5.18366	2.17577e-07	3.01311e-06	chrIV	10490403	10491063	-	Cbr-rla-2
2061	WBGene00024971	458.603	-0.0632438	0.120985	-0.522739	0.601156	0.739244	chrIV	10489549	10490329	-	Cbr-agt-1
2062	WBGene00024972	1232	0.376733	0.0921809	4.08689	4.37203e-05	0.000329388	chrIV	10486910	10489087	-	CBG01785
2063	WBGene00024973	6.49235	0.120849	0.426937	0.283061	0.77713	0.866215	chrIV	10484206	10486776	+	Cbr-srsx-25
2064	WBGene00024974	10.8564	-0.309816	0.411354	-0.753163	0.451352	0.616354	chrIV	10476372	10478084	+	CBG01787
2065	WBGene00024975	111.218	-0.203988	0.342906	-0.59488	0.551923	0.700351	chrIV	10465261	10467222	-	Cbr-pqn-74
2066	WBGene00024976	20630.8	0.351337	0.0779888	4.50496	6.63849e-06	6.31398e-05	chrIV	10462907	10464366	+	Cbr-fat-2
2067	WBGene00024977	12944.7	0.236759	0.0707751	3.34523	0.000822146	0.00413656	chrIV	10459729	10461578	+	Cbr-fat-1
2069	WBGene00024978	1845.88	0.0986666	0.0692999	1.42376	0.154515	0.288275	chrIV	10455882	10458411	+	CBG01792
2070	WBGene00024979	2176.01	0.0679712	0.0753142	0.902502	0.36679	0.536583	chrIV	10454211	10455886	+	Cbr-csn-6
2072	WBGene00024980	14729.4	0.230634	0.052758	4.37154	1.23374e-05	0.000109609	chrIV	10453357	10454078	+	Cbr-kdp-1
2073	WBGene00024981	2030.98	-0.150108	0.143336	-1.04725	0.294986	0.460673	chrIV	10451194	10453227	+	Cbr-micu-1
2074	WBGene00024982	1109.95	-0.0297207	0.10161	-0.292497	0.769906	0.861437	chrIV	10448455	10453265	-	CBG01796
2075	WBGene00024983	445.225	0.0750534	0.13704	0.547674	0.583915	0.726868	chrIV	10444689	10447669	-	CBG01797
2076	WBGene00024984	1347.49	-0.338996	0.112175	-3.02204	0.00251075	0.010704	chrIV	10441391	10444566	-	Cbr-cpsf-3
2077	WBGene00024985	1765.97	-0.35038	0.0829309	-4.22496	2.38981e-05	0.000194856	chrIV	10436762	10441390	-	Cbr-unc-26
2079	WBGene00024986	280.222	-0.363097	0.230561	-1.57484	0.115293	0.23114	chrIV	10431661	10433845	+	Cbr-bus-12
2080	WBGene00024987	710.904	0.156259	0.108098	1.44553	0.14831	0.27974	chrIV	10428916	10429448	+	Cbr-ttr-45
2081	WBGene00024988	944.246	-0.088109	0.0939114	-0.938214	0.348134	0.517446	chrIV	10426942	10427412	-	Cbr-ttr-51
2082	WBGene00024989	608.94	0.0532235	0.0963393	0.552459	0.580634	0.723884	chrIV	10425689	10426725	+	CBG01803
2083	WBGene00024990	909.357	-0.219486	0.0860635	-2.55028	0.0107635	0.0359046	chrIV	10424538	10425570	+	Cbr-cox-11
2084	WBGene00024991	699.009	-0.332687	0.126183	-2.63655	0.0083754	0.0292561	chrIV	10421367	10423865	+	Cbr-lin-54
2085	WBGene00024992	78699.7	0.312805	0.0617504	5.06564	4.07033e-07	5.29624e-06	chrIV	10420012	10421063	-	Cbr-rpl-12
2086	WBGene00024993	877.98	-0.111999	0.0929496	-1.20495	0.228223	0.38448	chrIV	10418478	10419964	-	CBG01807
2088	WBGene00024994	6069.01	0.339681	0.110975	3.06086	0.00220699	0.00958784	chrIV	10416719	10418381	-	CBG01808
2089	WBGene00024995	27.8622	-0.580209	0.309812	-1.87278	0.0610993	0.142337	chrIV	10415628	10416715	+	CBG01809
2090	WBGene00024996	4.31218	0.314364	0.392631	0.800661	0.423328	0.590215	chrIV	10411191	10412558	+	Cbr-col-121
2091	WBGene00024997	551.352	-1.17546	0.143737	-8.17784	2.88984e-16	1.72442e-14	chrIV	10401497	10405128	-	Cbr-cho-1
2093	WBGene00024998	2.3658	0.379385	0.362544	1.04645	0.295351	0.460949	chrIV	10398007	10398981	-	CBG01812
2094	WBGene00024999	129.028	0.116042	0.186193	0.623235	0.53313	0.686169	chrIV	10393312	10396154	-	Cbr-ced-3
2095	WBGene00025000	728.854	-0.74041	0.204388	-3.62257	0.000291691	0.0016968	chrIV	10388236	10392865	-	Cbr-lev-1
2096	WBGene00025001	54.863	0.00831023	0.384537	0.021611	0.982758	0.990689	chrIV	10385303	10387923	+	Cbr-nas-14
2097	WBGene00025002	1076.87	-0.43058	0.124927	-3.44665	0.000567586	0.00302153	chrIV	10379586	10382369	-	CBG01816
2099	WBGene00025003	133.89	-0.841541	0.189756	-4.43485	9.21367e-06	8.42129e-05	chrIV	10377907	10382369	+	Cbr-nlp-79
2101	WBGene00025004	7.31366	0.281517	0.425796	0.661154	0.508513	0.666128	chrIV	10370859	10371920	-	CBG01818
2103	WBGene00025005	226.154	0.46133	0.181026	2.54842	0.0108213	0.0360588	chrIV	10368525	10370842	+	CBG01819
2105	WBGene00025006	167.985	-0.422244	0.180715	-2.33652	0.0194643	0.057633	chrIV	10357374	10361752	+	Cbr-unc-30
2106	WBGene00025007	350.346	-0.32729	0.119183	-2.74612	0.00603052	0.0222079	chrIV	10351251	10353481	-	Cbr-best-1
2108	WBGene00025008	438.096	0.0760173	0.161769	0.469913	0.638417	0.766501	chrIV	10349874	10354203	+	CBG01823
2109	WBGene00025009	641.736	-0.117035	0.0915384	-1.27853	0.201063	0.350872	chrIV	10348226	10349738	+	CBG01824
2111	WBGene00025010	1999.35	-0.185882	0.0653732	-2.8434	0.00446352	0.0173153	chrIV	10344904	10345724	+	Cbr-exos-4.1
2112	WBGene00025011	3018.93	0.211881	0.0781739	2.71038	0.00672063	0.0243285	chrIV	10341157	10344257	-	Cbr-dli-1
2113	WBGene00025012	853.382	-0.042058	0.0832397	-0.505264	0.613374	0.748523	chrIV	10339900	10341156	+	Cbr-rfc-3
2114	WBGene00025013	672.103	-0.0414177	0.0971885	-0.426158	0.669993	0.789786	chrIV	10334746	10339843	+	CBG01828
2115	WBGene00025014	872.65	-0.13606	0.10077	-1.3502	0.176951	0.318832	chrIV	10332931	10334711	-	CBG01829
2116	WBGene00025015	5.10001	1.22203	0.426559	2.86487	0.00417186	0.0163849	chrIV	10331728	10332808	-	Cbr-col-132
2117	WBGene00025016	600.636	-0.776345	0.15006	-5.17358	2.29653e-07	3.15469e-06	chrIV	10329977	10331727	+	Cbr-spin-2
2118	WBGene00025017	1667.16	0.823437	0.102758	8.01339	1.1159e-15	6.20431e-14	chrIV	10325441	10327354	+	CBG01832
2119	WBGene00025018	538.077	0.263277	0.0983472	2.67702	0.00742808	0.0264701	chrIV	10319180	10322239	-	CBG01833
2121	WBGene00025019	5.63557	0.742474	0.409048	1.81513	0.069504	0.157187	chrIV	10318381	10319188	+	CBG01834
2123	WBGene00025020	255.812	-0.652177	0.164264	-3.97029	7.17858e-05	0.000507375	chrIV	10316928	10317806	+	Cbr-scl-6
2124	WBGene00025021	3.73031	1.03083	0.3959	2.60376	0.00922073	0.0316658	chrIV	10314908	10315632	+	CBG01836
2125	WBGene00025022	3.12805	0.60311	0.33701	1.78959	0.0735195	0.163953	chrIV	10313268	10313841	+	CBG01837
2126	WBGene00025023	6.15433	0.0997222	0.332145	0.300237	0.763997	0.857237	chrIV	10306832	10307412	-	CBG01838
2127	WBGene00025024	1092.7	2.27274	0.111073	20.4616	4.73269e-93	2.46324e-90	chrIV	10299801	10301546	-	Cbr-igeg-1
2129	WBGene00025025	1.97714	0.204613	0.212411	0.963291	0.335402	0.504287	chrIV	10287521	10288240	+	Cbr-scl-15
2130	WBGene00025026	5.24285	1.25615	0.417363	3.00974	0.00261474	0.0110757	chrIV	10286107	10286746	-	CBG01845
2131	WBGene00025027	41.9989	0.38857	0.298913	1.29994	0.19362	0.341157	chrIV	10279132	10280465	-	CBG01846
2132	WBGene00025028	1138.79	-0.244294	0.146788	-1.66426	0.0960605	0.20099	chrIV	10277614	10278568	+	Cbr-scl-5
2133	WBGene00025029	483.133	-0.179646	0.163692	-1.09746	0.272438	0.436863	chrIV	10271397	10272278	+	Cbr-scl-3
2134	WBGene00025030	509.993	0.717826	0.244232	2.93911	0.00329155	0.0134512	chrIV	10269328	10270319	+	Cbr-scl-2
2135	WBGene00025031	612.565	0.351398	0.097405	3.6076	0.000309046	0.00178391	chrIV	10264977	10268309	+	Cbr-hasp-1
2137	WBGene00025032	1.73141	0.356548	0.333934	1.06772	0.285647	0.450632	chrX	3045705	3046283	+	CBG01852
2138	WBGene00025033	2.01661	0.193813	0.313895	0.617444	0.536942	0.689122	chrX	3046475	3047842	+	CBG01853
2139	WBGene00025034	5.87198	1.37156	0.411916	3.32972	0.000869344	0.00434602	chrX	3047883	3051759	+	CBG01854
2140	WBGene00025035	0	NA	NA	NA	NA	NA	chrX	3051808	3052194	+	CBG01855
2141	WBGene00025036	1.18593	0.457732	0.294719	1.55311	0.120397	NA	chrX	3058037	3060802	+	CBG01856
2142	WBGene00025037	207.827	0.646695	0.223716	2.89069	0.00384394	0.0153438	chrX	3061538	3063436	+	CBG01857
2143	WBGene00025038	55218.8	0.342922	0.06907	4.96485	6.87532e-07	8.46405e-06	chrX	3064057	3065036	-	CBG01858
2145	WBGene00025039	21548.8	0.324012	0.0899842	3.60076	0.000317284	0.00182641	chrX	3066936	3068354	+	CBG01859
2149	WBGene00025040	1144.31	-0.777581	0.104655	-7.42994	1.08644e-13	4.78977e-12	chrX	3068961	3073352	-	Cbr-slc-17.1
2151	WBGene00025041	7984.61	0.995227	0.153551	6.48142	9.08608e-11	2.49627e-09	chrX	3073487	3081004	-	Cbr-tps-1
2153	WBGene00025042	83.1585	-0.286307	0.222113	-1.28902	0.197393	0.345885	chrX	3087992	3091058	-	Cbr-npr-24
2154	WBGene00025043	2172.79	0.330764	0.108688	3.04324	0.00234043	0.0100857	chrX	3120686	3127018	+	Cbr-nhr-1
2156	WBGene00025044	131.999	-0.365998	0.197783	-1.8505	0.0642416	0.147854	chrX	3128182	3129850	+	CBG01867
2157	WBGene00025046	151.422	-0.491284	0.225663	-2.17707	0.029475	0.0802943	chrX	3132767	3135354	+	Cbr-sup-10
2158	WBGene00025047	26.1496	-0.260397	0.357689	-0.728	0.466613	0.629449	chrX	3136225	3137779	-	CBG01871
2159	WBGene00025048	5.01225	0.465438	0.427241	1.0894	0.275976	0.440832	chrX	3143978	3144892	-	CBG01872
2160	WBGene00025049	407.346	-0.343238	0.113687	-3.01915	0.00253488	0.010797	chrX	3155108	3159502	-	CBG01874
2162	WBGene00025050	168.392	-0.673754	0.163582	-4.11874	3.80944e-05	0.000292368	chrX	3163975	3173734	-	Cbr-frpr-7
2163	WBGene00025051	3836.18	0.0302673	0.111238	0.272095	0.785549	0.871143	chrX	3187994	3188776	+	Cbr-lec-9
2164	WBGene00025052	924.681	-0.0944999	0.157323	-0.600676	0.548056	0.696954	chrX	3188979	3193518	-	CBG01880
2166	WBGene00025053	51.7308	-1.04574	0.287187	-3.64132	0.000271246	0.00159121	chrX	3197173	3201309	+	Cbr-ncs-7
2167	WBGene00025054	1188.72	-0.0840757	0.0949848	-0.885148	0.376077	0.546286	chrX	3201681	3216744	-	CBG01882
2169	WBGene00025055	10.9286	0.612344	0.401145	1.52649	0.126888	0.248744	chrX	3219899	3221293	+	Cbr-tmem-218
2170	WBGene00025056	242.012	-0.00170885	0.150818	-0.0113305	0.99096	0.995401	chrX	3227825	3228903	+	Cbr-nlp-6
2171	WBGene00025057	6666.66	-0.00459916	0.0833955	-0.0551488	0.95602	0.975332	chrX	3233218	3243636	+	CBG01887
2177	WBGene00025059	143.028	-0.992736	0.261404	-3.7977	0.000146044	0.000938095	chrX	3243637	3244068	-	CBG01889
2178	WBGene00025060	769.589	0.760697	0.1753	4.33941	1.42864e-05	0.000124571	chrX	3247393	3250246	-	CBG01890
2179	WBGene00025061	0.649849	0.0564498	0.271894	0.207617	0.835528	NA	chrX	3250780	3251893	+	CBG01891
2180	WBGene00025062	9.97096	0.526528	0.415676	1.26668	0.20527	0.356149	chrX	3254145	3255371	-	CBG01892
2181	WBGene00025063	18.2507	0.773275	0.385614	2.00531	0.0449302	0.111726	chrX	3260985	3263706	-	CBG01893
2182	WBGene00025064	41.0327	-0.664822	0.354068	-1.87767	0.0604269	0.141122	chrX	3265541	3268362	+	CBG01894
2183	WBGene00025065	1879.69	0.136121	0.0705214	1.93021	0.0535809	0.128398	chrX	3268240	3277818	-	CBG01895
2185	WBGene00025066	1159.7	0.108459	0.0914774	1.18564	0.235765	0.393158	chrX	3281720	3285592	-	CBG01897
2186	WBGene00025067	586.668	-0.621213	0.1378	-4.50808	6.54159e-06	6.23765e-05	chrX	3288243	3294523	+	Cbr-lgc-47
2187	WBGene00025068	43.3353	-0.887883	0.287109	-3.09249	0.00198483	0.00877946	chrX	3294524	3297578	-	CBG01899
2188	WBGene00025069	14219.3	-0.255416	0.0838149	-3.04738	0.00230842	0.00996151	chrX	3298465	3312308	-	Cbr-dpy-22
2189	WBGene00025070	1597.25	0.357764	0.0885302	4.04115	5.319e-05	0.00039022	chrX	3315876	3324445	-	Cbr-rrc-1
2191	WBGene00025071	3069.96	1.49017	0.202906	7.34412	2.07118e-13	8.66243e-12	chrX	3327610	3334384	-	Cbr-ipla-2
2192	WBGene00025072	45.9594	0.285505	0.273564	1.04365	0.296649	0.462383	chrX	3344696	3347017	+	Cbr-vab-15
2193	WBGene00025073	9893.32	0.795672	0.0822394	9.67506	3.84852e-22	3.75572e-20	chrX	3348492	3349263	+	Cbr-lec-8
2194	WBGene00025074	124.815	0.630195	0.180626	3.48896	0.000484912	0.00263459	chrX	3350394	3351930	+	Cbr-lec-7
2195	WBGene00025075	63.9668	-0.679455	0.242742	-2.79908	0.00512489	0.0194069	chrX	3356218	3357233	+	CBG01906
2196	WBGene00025076	1859.29	-0.359411	0.0886929	-4.0523	5.07158e-05	0.000374857	chrX	3357616	3361309	+	Cbr-scav-5
2197	WBGene00025077	2600.74	0.782348	0.176362	4.43603	9.16326e-06	8.38203e-05	chrX	3361310	3362878	-	Cbr-gst-36
2198	WBGene00025078	58.8909	0.600236	0.313418	1.91513	0.0554761	0.131967	chrX	3363313	3367036	+	CBG01909
2204	WBGene00025079	98.3463	0.515176	0.29149	1.76739	0.0771634	0.170196	chrX	3367015	3367828	+	CBG01910
2205	WBGene00025080	57.8753	0.342273	0.265272	1.29027	0.196957	0.345413	chrX	3368360	3370620	-	CBG01911
2207	WBGene00025081	331.335	0.0910695	0.12101	0.752578	0.451704	0.616654	chrX	3370785	3381554	-	Cbr-glo-1
2208	WBGene00025082	218.702	0.242377	0.242967	0.997574	0.318486	0.485871	chrX	3375874	3380541	+	CBG01914
2210	WBGene00025084	3553.21	-0.128493	0.0739018	-1.7387	0.0820872	0.178052	chrX	3382801	3388481	+	Cbr-mrp-4
2211	WBGene00025085	974.71	0.253818	0.096953	2.61795	0.00884607	0.0306049	chrX	3388608	3392221	-	CBG01917
2212	WBGene00025086	6.49849	1.01335	0.427757	2.369	0.0178363	0.0538423	chrX	3393811	3396854	+	CBG01918
2213	WBGene00025087	518.662	0.42295	0.139611	3.02948	0.00244973	0.0104909	chrX	3400885	3406290	-	CBG01919
2214	WBGene00025089	210.756	0.0792696	0.182785	0.433676	0.664524	0.785402	chrX	3416200	3418082	+	CBG01922
2215	WBGene00025090	3071.62	0.00248647	0.078889	0.0315186	0.974856	0.98564	chrX	3418071	3428402	-	CBG01923
2216	WBGene00025091	5.59984	-0.365357	0.427312	-0.855012	0.392545	0.561544	chrX	3431168	3433842	+	CBG01925
2217	WBGene00025092	0.267192	-0.0614231	0.172259	-0.356574	0.721411	NA	chrX	3434987	3435743	+	CBG01926
2218	WBGene00025093	1.16276	0.482974	0.300779	1.60574	0.10833	NA	chrX	3437339	3438849	-	CBG01927
2219	WBGene00025094	2.3266	0.562295	0.366223	1.53539	0.124689	0.245383	chrX	3441173	3443354	+	CBG01928
2220	WBGene00025095	1.99331	0.456019	0.34232	1.33214	0.182813	0.32663	chrX	3443915	3444318	+	CBG01929
2221	WBGene00025097	0.157723	-0.0223768	0.172057	-0.130055	0.896523	NA	chrX	3444491	3445290	+	CBG01931
2222	WBGene00025098	1.75672	0.372345	0.272159	1.36812	0.171276	0.310999	chrX	3445823	3446639	-	CBG01932
2223	WBGene00025099	4.19392	1.00164	0.378439	2.64677	0.00812655	0.0285412	chrX	3446812	3447338	-	CBG01933
2224	WBGene00025100	6.12019	1.30226	0.419933	3.10112	0.00192792	0.00856818	chrX	3451028	3452433	+	CBG01935
2225	WBGene00025101	6621.55	1.37195	0.0819474	16.7418	6.49567e-63	2.02849e-60	chrX	3455115	3458058	-	Cbr-cbs-1
2226	WBGene00025102	35.6057	0.0189762	0.306693	0.0618737	0.950663	0.972674	chrX	3459847	3462249	-	Cbr-gnrr-3
2227	WBGene00025103	1476.76	-0.213632	0.0983813	-2.17147	0.0298956	0.0811675	chrX	3464188	3476026	+	CBG01939
2229	WBGene00025104	425.604	-0.26648	0.122841	-2.1693	0.0300602	0.0815104	chrX	3477700	3480044	-	Cbr-mkk-4
2230	WBGene00025105	354.899	0.230625	0.118175	1.95155	0.0509917	0.123552	chrX	3486591	3489604	+	CBG01942
2231	WBGene00025106	120.495	-0.160875	0.19426	-0.828143	0.40759	0.575683	chrX	3490075	3493963	+	CBG01943
2232	WBGene00025107	294.26	-0.203849	0.122318	-1.66656	0.0956028	0.200258	chrX	3500697	3503579	+	CBG01945
2234	WBGene00025108	753.259	-0.0870634	0.0901839	-0.965398	0.334345	0.503264	chrX	3503565	3509390	-	CBG01946
2235	WBGene00025109	1473.02	-0.617773	0.145536	-4.24482	2.18765e-05	0.000180572	chrX	3511067	3522036	+	Cbr-grk-1
2237	WBGene00025110	140.13	0.132142	0.166683	0.792774	0.42791	0.594215	chrX	3526170	3529156	+	CBG01948
2239	WBGene00025111	337.377	-0.288234	0.148546	-1.94037	0.052335	0.126057	chrX	3535173	3544232	+	Cbr-mgl-1
2241	WBGene00025112	2570.53	0.261137	0.0681544	3.83155	0.000127338	0.000833075	chrX	3544594	3547173	-	Cbr-pssy-1
2242	WBGene00025114	2376.09	0.220509	0.0734284	3.00305	0.00267292	0.0112951	chrX	3548370	3553750	-	CBG01952
2243	WBGene00025115	1936.89	0.129019	0.0674026	1.91415	0.0556007	0.132157	chrX	3556866	3559198	+	Cbr-cysl-1
2244	WBGene00025116	966.4	-0.78159	0.375292	-2.08262	0.037286	0.0965488	chrX	3563450	3567052	+	Cbr-nas-37
2246	WBGene00025117	380.184	0.345582	0.146541	2.35825	0.0183613	0.0550985	chrX	3568195	3570773	-	CBG01955
2247	WBGene00025118	697.758	-0.910231	0.131945	-6.89856	5.25327e-12	1.78964e-10	chrX	3575317	3580289	-	Cbr-tsp-21
2248	WBGene00025119	1117.93	-0.316962	0.094047	-3.37025	0.000750989	0.00383728	chrX	3578888	3589124	+	Cbr-nra-3
2250	WBGene00025120	973.16	-0.0944047	0.103246	-0.914365	0.360525	0.529979	chrX	3592161	3594864	+	Cbr-ugt-23
2251	WBGene00025121	48.1878	-0.34463	0.3067	-1.12367	0.261152	0.423361	chrX	3598568	3599667	-	CBG01961
2252	WBGene00025122	1.07844	0.145255	0.182177	0.797331	0.425259	NA	chrX	3597515	3597844	-	CBG01962
2253	WBGene00025123	1.00842	-0.29414	0.312182	-0.942206	0.346087	NA	chrX	3603938	3605210	-	CBG01963
2254	WBGene00025124	0.289209	0.0193148	0.172208	0.11216	0.910697	NA	chrX	3606054	3606310	-	CBG01964
2255	WBGene00025125	28.2333	0.37808	0.305517	1.23751	0.215898	0.368927	chrX	3610659	3611106	-	CBG01966
2256	WBGene00025126	1870.41	1.00569	0.212787	4.7263	2.28648e-06	2.45512e-05	chrX	3612171	3621755	-	Cbr-mlck-1
2257	WBGene00025128	189.345	0.0190184	0.202659	0.0938443	0.925233	0.958324	chrX	3628412	3630425	+	CBG01969
2258	WBGene00025129	431.116	-0.132335	0.118032	-1.12117	0.262214	0.424703	chrX	3625272	3630912	-	CBG01970
2259	WBGene00025130	5.13789	-0.0108441	0.426749	-0.0254109	0.979727	0.988751	chrX	3632840	3633813	+	Cbr-dao-4
2260	WBGene00025131	3799.33	-0.460762	0.160948	-2.8628	0.00419909	0.016459	chrX	3635629	3636668	+	Cbr-col-176
2261	WBGene00025132	11016.8	0.242986	0.0783239	3.10232	0.00192007	0.00854603	chrX	3644868	3669358	+	CBG01975
2263	WBGene00025133	454.318	-0.0640059	0.164159	-0.389902	0.696609	0.810353	chrX	3650967	3652347	-	Cbr-flp-28
2264	WBGene00025134	338.654	-0.0638323	0.122978	-0.519054	0.603723	0.741069	chrX	3656168	3657617	-	Cbr-flp-3
2265	WBGene00025135	211.729	0.0981072	0.149868	0.654624	0.51271	0.669546	chrX	3659040	3659725	-	Cbr-flp-2
2267	WBGene00025136	1172.97	-0.0892708	0.132018	-0.676204	0.498911	0.658451	chrX	3669592	3698920	-	Cbr-unc-58
2273	WBGene00025139	7.46273	0.0917648	0.424769	0.216035	0.828961	0.899233	chrX	3711970	3713095	+	CBG01987
2274	WBGene00025140	0.109469	-0.0223768	0.172057	-0.130055	0.896523	NA	chrX	3717635	3717853	-	CBG01988
2275	WBGene00025141	0.109469	-0.0223768	0.172057	-0.130055	0.896523	NA	chrX	3718787	3719059	+	CBG01989
2276	WBGene00025142	0.218937	-0.0591805	0.17222	-0.343633	0.731122	NA	chrX	3730382	3732512	+	CBG01991
2277	WBGene00025143	0.374194	0.0169925	0.174279	0.0975013	0.922328	NA	chrX	3735454	3736354	+	CBG01993
2278	WBGene00025144	19.8496	-0.29433	0.377334	-0.780024	0.435377	0.601286	chrX	3738058	3740149	+	CBG01994
2279	WBGene00025145	656.114	-0.135457	0.115667	-1.17109	0.241563	0.399979	chrX	3747967	3750692	-	Cbr-moc-1
2280	WBGene00025146	2202.18	4.67551	0.261588	17.8736	1.89523e-71	7.24713e-69	chrX	3751727	3754304	-	Cbr-oac-14
2281	WBGene00025148	0.198721	0.0587315	0.172057	0.34135	0.73284	NA	chrX	3765445	3766641	-	CBG02000
2282	WBGene00025149	0.678189	0.0422887	0.240238	0.176028	0.860272	NA	chrX	3767262	3768582	+	CBG02001
2283	WBGene00025150	0.315446	-0.0651024	0.172323	-0.377794	0.705584	NA	chrX	3771442	3773377	+	CBG02002
2284	WBGene00025151	0.171277	-0.0223768	0.172057	-0.130055	0.896523	NA	chrX	3774228	3775852	-	CBG02003
2285	WBGene00025152	0.157723	-0.0223768	0.172057	-0.130055	0.896523	NA	chrX	3776860	3779241	+	CBG02004
2286	WBGene00025153	0.202917	0.0587315	0.172057	0.34135	0.73284	NA	chrX	3781334	3782896	+	CBG02005
2287	WBGene00025154	0.784295	0.330485	0.258957	1.27622	0.201879	NA	chrX	3784273	3785569	-	CBG02006
2288	WBGene00025155	1.09249	0.401166	0.315028	1.27343	0.202865	NA	chrX	3791665	3792790	+	CBG02007
2289	WBGene00025156	0.483663	-0.0319326	0.225022	-0.141909	0.887152	NA	chrX	3795732	3796878	+	CBG02008
2290	WBGene00025157	1.3407	0.268813	0.350708	0.766488	0.443386	NA	chrX	3803419	3805019	-	CBG02010
2291	WBGene00025159	25.6744	-0.117802	0.363484	-0.324091	0.745869	0.845421	chrX	3811938	3815715	+	CBG02012
2292	WBGene00025160	200.341	-0.356939	0.154251	-2.31402	0.0206666	0.0605332	chrX	3816047	3819883	-	Cbr-osm-5
2293	WBGene00025161	19.3023	-0.351428	0.390916	-0.898986	0.36866	0.538729	chrX	3819973	3821643	-	CBG02014
2294	WBGene00025162	359.386	0.524259	0.126317	4.15035	3.31974e-05	0.000259283	chrX	3821866	3826495	-	Cbr-aakg-3
2295	WBGene00025163	926.705	-0.069054	0.13198	-0.523217	0.600824	0.738884	chrX	3834244	3841139	-	Cbr-gbb-1
2296	WBGene00025165	675.242	-0.686396	0.183597	-3.7386	0.000185047	0.0011519	chrX	3848091	3850623	-	CBG02018
2298	WBGene00025166	718.605	0.685369	0.143927	4.76192	1.9176e-06	2.09872e-05	chrX	3850749	3851489	+	CBG02019
2299	WBGene00025167	5161.53	0.0302014	0.0840021	0.359531	0.719198	0.827536	chrX	3851514	3855287	-	Cbr-pfk-1.1
2300	WBGene00025168	4176.69	-0.318668	0.183572	-1.73593	0.082576	0.178932	chrX	3857379	3860067	-	Cbr-fard-1
2301	WBGene00025169	226.78	-0.341935	0.133969	-2.55236	0.0106997	0.035724	chrX	3868647	3872478	+	Cbr-hst-3.2
2302	WBGene00025170	13264	-0.0788771	0.0901221	-0.875225	0.381452	0.551423	chrX	3874679	3883079	-	Cbr-nmy-1
2304	WBGene00025171	141.073	-0.232089	0.176987	-1.31133	0.189746	0.335878	chrX	3893587	3899624	+	CBG02027
2305	WBGene00025172	536.762	-1.35788	0.160339	-8.4688	2.47938e-17	1.6651e-15	chrX	3900603	3901423	+	CBG02028
2306	WBGene00025173	363.923	-0.249721	0.115274	-2.16632	0.0302871	0.0820071	chrX	3901433	3904769	-	Cbr-vang-1
2307	WBGene00025174	1872.64	-0.407269	0.111538	-3.65138	0.000260832	0.00154159	chrX	3910908	3916748	+	CBG02030
2309	WBGene00025175	177.982	-0.18647	0.160976	-1.15837	0.246713	0.406281	chrX	3917833	3923927	+	CBG02031
2310	WBGene00025176	3345.39	0.0837512	0.0781316	1.07193	0.283754	0.448704	chrX	3924141	3925771	-	CBG02032
2311	WBGene00025177	40.7189	-0.531564	0.376547	-1.41168	0.158044	0.293166	chrX	3927177	3930912	+	Cbr-comt-1
2312	WBGene00025178	7.40858	0.962569	0.4257	2.26114	0.0237503	0.067528	chrX	3931810	3934825	+	CBG02035
2313	WBGene00025179	1328.55	-0.075212	0.0841799	-0.893468	0.371607	0.541515	chrX	3935992	3943870	+	Cbr-kin-29
2314	WBGene00025180	30.584	0.262049	0.367336	0.713376	0.475613	0.637953	chrX	3944975	3947269	-	CBG02037
2315	WBGene00025181	4983.15	0.551188	0.0683085	8.0691	7.08176e-16	4.02094e-14	chrX	3948684	3953414	+	CBG02038
2317	WBGene00025182	135.299	-0.475761	0.192397	-2.4728	0.0134058	0.0427985	chrX	3957211	3961092	+	Cbr-ssr-2
2319	WBGene00025183	134.305	-0.0771446	0.247853	-0.311251	0.75561	0.851566	chrX	3962183	3963209	-	CBG02040
2320	WBGene00025184	146.273	-0.713196	0.176153	-4.04872	5.14982e-05	0.000379891	chrX	3969430	3973081	+	CBG02041
2322	WBGene00025185	239.256	-0.107755	0.166666	-0.646532	0.517935	0.673833	chrX	3973600	3975475	+	CBG02042
2323	WBGene00025186	315.212	0.194724	0.119232	1.63315	0.102438	0.211199	chrX	3979213	3981873	+	CBG02044
2324	WBGene00025187	511.187	0.211733	0.133105	1.59072	0.111672	0.225741	chrX	3981852	3983914	-	CBG02045
2325	WBGene00025188	862.382	-0.317058	0.0859735	-3.68786	0.000226149	0.00136689	chrX	3987682	4013968	-	Cbr-cgef-1
2333	WBGene00025194	3984.8	-0.270361	0.11327	-2.38689	0.0169918	0.0517347	chrX	4022883	4079547	+	Cbr-unc-2
2340	WBGene00025196	1177.54	-0.393799	0.135778	-2.90032	0.00372786	0.0149378	chrX	4084485	4090567	+	Cbr-igcm-3
2341	WBGene00025197	4973.18	0.14301	0.0863424	1.65631	0.0976595	0.203452	chrX	4091164	4094394	-	CBG02062
2342	WBGene00025198	308.515	0.448644	0.191879	2.33816	0.0193788	0.0574427	chrX	4098959	4101081	-	CBG02063
2343	WBGene00025199	9369.16	0.194248	0.0623758	3.11415	0.00184475	0.00826718	chrX	4102574	4107573	+	Cbr-immt-1
2344	WBGene00025200	3.49829	0.740384	0.410747	1.80253	0.0714619	0.160472	chrX	4112381	4113201	-	CBG02066
2345	WBGene00025201	164.857	-1.132	0.191995	-5.896	3.72426e-09	7.46325e-08	chrX	4120312	4129384	-	Cbr-ser-7
2349	WBGene00025203	1707.33	-0.590865	0.0839997	-7.03413	2.00503e-12	7.18323e-11	chrX	4134708	4166257	+	CBG02071
2356	WBGene00025205	3023.39	0.120829	0.104978	1.15099	0.249736	0.409352	chrX	4171692	4176407	+	CBG02074
2357	WBGene00025206	861.776	-0.912882	0.270694	-3.37237	0.000745239	0.00381309	chrX	4185383	4187211	-	CBG02076
2358	WBGene00025207	1045.6	-0.585262	0.0887256	-6.59631	4.21508e-11	1.24965e-09	chrX	4188673	4198868	-	Cbr-nhr-40
2360	WBGene00025208	1.57911	0.361212	0.301293	1.19887	0.230578	NA	chrX	4206537	4208320	+	CBG02079
2361	WBGene00025209	243.202	0.5817	0.14176	4.10342	4.07082e-05	0.000309508	chrX	4212780	4214940	+	CBG02080
2363	WBGene00025210	23.8431	0.970985	0.359559	2.70049	0.00692379	0.0249351	chrX	4214941	4216212	-	Cbr-ttr-42
2364	WBGene00025211	644.694	0.0466002	0.0980906	0.475073	0.634735	0.763548	chrX	4216387	4218855	-	CBG02082
2365	WBGene00025212	1061.44	-0.0792032	0.102415	-0.773356	0.439312	0.604715	chrX	4219466	4224027	+	CBG02083
2366	WBGene00025213	4835.16	0.203677	0.0881186	2.31139	0.0208113	0.0609092	chrX	4225587	4229356	+	CBG02085
2367	WBGene00025214	148.147	0.0606703	0.180754	0.335651	0.737134	0.839769	chrX	4231736	4233565	+	CBG02087
2368	WBGene00025215	704.282	-0.6341	0.10661	-5.94783	2.71725e-09	5.55213e-08	chrX	4237046	4239982	-	Cbr-aat-3
2369	WBGene00025216	151.371	-0.692649	0.19349	-3.57976	0.000343904	0.00195679	chrX	4244431	4248350	+	CBG02091
2370	WBGene00025217	66.1417	-0.513146	0.245498	-2.09022	0.0365979	0.095109	chrX	4250584	4252062	+	CBG02092
2371	WBGene00025218	888.801	-0.453699	0.0811885	-5.58821	2.29421e-08	3.91855e-07	chrX	4259796	4267088	+	Cbr-tbc-12
2372	WBGene00025219	758.043	-0.547951	0.111431	-4.9174	8.76996e-07	1.04865e-05	chrX	4277647	4283307	+	Cbr-syg-1
2373	WBGene00025220	543.897	-0.131691	0.120002	-1.0974	0.272467	0.436863	chrX	4284357	4296566	+	CBG02096
2374	WBGene00025221	264.693	-0.503291	0.143703	-3.50229	0.000461278	0.00252129	chrX	4296558	4300705	-	CBG02097
2375	WBGene00025222	1106.8	0.0774951	0.101932	0.760261	0.447099	0.61224	chrX	4303491	4307961	-	Cbr-hid-1
2376	WBGene00025223	279.121	-0.761356	0.302285	-2.51867	0.0117799	0.0385876	chrX	4308710	4311451	-	CBG02099
2377	WBGene00025224	75.3184	0.0180702	0.218033	0.0828782	0.933948	0.963252	chrX	4312248	4314131	+	CBG02100
2378	WBGene00025225	11.2041	-0.832152	0.405499	-2.05217	0.0401531	0.102333	chrX	4315915	4317641	+	CBG02102
2379	WBGene00025226	52.14	0.303026	0.341094	0.888396	0.374328	0.544548	chrX	4318663	4321832	+	CBG02103
2380	WBGene00025227	170.697	-0.0816273	0.175829	-0.464243	0.642473	0.768926	chrX	4321916	4325451	+	CBG02104
2381	WBGene00025228	71.6813	-0.323919	0.237741	-1.36249	0.173044	0.313538	chrX	4325572	4329114	+	CBG02105
2382	WBGene00025229	450.499	-0.763174	0.112432	-6.78788	1.13794e-11	3.68886e-10	chrX	4335530	4346567	+	Cbr-fox-1
2384	WBGene00025230	1041.96	0.533927	0.163102	3.27358	0.00106194	0.00516018	chrX	4354217	4360868	+	CBG02109
2385	WBGene00025231	93.2492	0.960342	0.228261	4.20721	2.58541e-05	0.000209011	chrX	4362320	4369134	+	Cbr-gcy-31
2386	WBGene00025232	137.578	1.07874	0.208688	5.16915	2.35159e-07	3.22324e-06	chrX	4369154	4374480	+	Cbr-glr-7
2387	WBGene00025233	6.98204	0.474306	0.424791	1.11656	0.26418	0.426904	chrX	4374595	4375010	+	Cbr-hlh-15
2388	WBGene00025234	696.578	-0.235914	0.0969239	-2.43402	0.0149323	0.0465922	chrX	4374994	4377793	-	Cbr-trpp-12
2389	WBGene00025235	421.534	-0.091658	0.110108	-0.832437	0.405162	0.573205	chrX	4377790	4379078	-	CBG02114
2390	WBGene00025236	1106.17	0.0870969	0.114286	0.762095	0.446003	0.611411	chrX	4379119	4383188	-	CBG02115
2391	WBGene00025237	339.161	-0.426435	0.13462	-3.16769	0.00153658	0.00706004	chrX	4384618	4387783	+	Cbr-dhhc-9
2392	WBGene00025238	57.0453	-0.493444	0.246627	-2.00077	0.0454175	0.112773	chrX	4387762	4391501	-	CBG02117
2393	WBGene00025239	1857.77	-0.167791	0.104381	-1.60749	0.107947	0.21973	chrX	4393540	4402955	-	CBG02118
2394	WBGene00025240	6.34703	1.54586	0.424402	3.64243	0.000270073	0.00158533	chrX	4421552	4425899	-	CBG02124
2395	WBGene00025241	414.067	-0.454474	0.110563	-4.11054	3.94732e-05	0.000301021	chrX	4432266	4435949	-	CBG02127
2396	WBGene00025242	296.689	-0.717697	0.142312	-5.04313	4.57977e-07	5.87346e-06	chrX	4442655	4446523	-	Cbr-lgc-40
2401	WBGene00025244	83.8591	0.140114	0.223987	0.625546	0.531613	0.685017	chrX	4463135	4464407	+	Cbr-nlp-2
2402	WBGene00025245	5.34237	-0.756689	0.424936	-1.78071	0.0749595	0.166392	chrX	4466489	4467247	+	Cbr-nlp-23
2403	WBGene00025247	250.815	0.824032	0.259478	3.17572	0.00149463	0.00690116	chrX	4485562	4495266	+	Cbr-aakg-4
2404	WBGene00025248	4201.69	-0.346129	0.127016	-2.72509	0.00642844	0.0234566	chrX	4495267	4506184	-	Cbr-hum-6
2405	WBGene00025249	477.14	-0.477515	0.117139	-4.07647	4.57254e-05	0.000342429	chrX	4510341	4512948	-	CBG02142
2406	WBGene00025250	1044.09	-0.551851	0.134621	-4.09931	4.14388e-05	0.000313713	chrX	4518797	4522523	+	Cbr-sav-1
2408	WBGene00025251	38.7306	-0.786712	0.297926	-2.64063	0.0082752	0.0289655	chrX	4531718	4534241	+	CBG02145
2409	WBGene00025252	209.06	-1.71626	0.170564	-10.0623	8.10922e-24	9.26478e-22	chrX	4537719	4542946	+	CBG02146
2411	WBGene00025253	878.688	0.0534488	0.119026	0.449052	0.653394	0.777111	chrX	4549216	4551682	+	CBG02149
2413	WBGene00025254	39.1173	-0.343536	0.316697	-1.08475	0.278033	0.442985	chrX	4552924	4556991	+	CBG02150
2414	WBGene00025255	1.71365	0.449475	0.359712	1.24954	0.211467	0.363643	chrX	4559200	4564145	-	CBG02153
2415	WBGene00025256	3.73344	-0.132344	0.383176	-0.345387	0.729803	0.834513	chrX	4571570	4572351	+	CBG02155
2416	WBGene00025257	34.1058	-0.128685	0.31782	-0.4049	0.685551	0.802071	chrX	4574894	4579780	-	CBG02156
2417	WBGene00025259	285.266	0.353606	0.205841	1.71786	0.0858219	0.184282	chrX	4585384	4587564	-	CBG02160
2418	WBGene00025260	22.7138	0.295121	0.33119	0.891094	0.372879	0.543157	chrX	4590323	4591831	-	CBG02161
2419	WBGene00025261	2.50833	-0.0170938	0.291485	-0.0586438	0.953236	0.973764	chrX	4596304	4597813	+	CBG02162
2420	WBGene00025262	1.35611	0.243819	0.344713	0.707309	0.479375	NA	chrX	4598321	4599449	+	CBG02163
2422	WBGene00025263	7.23071	-0.188631	0.422858	-0.446086	0.655535	0.77877	chrX	4600263	4600569	+	CBG02164
2423	WBGene00025265	16.9012	1.33788	0.371629	3.60005	0.000318155	0.00182973	chrX	4611213	4613084	-	CBG02167
2424	WBGene00025266	16.2098	0.306542	0.393289	0.779433	0.435725	0.601546	chrX	4619813	4625396	-	CBG02169
2427	WBGene00025267	179.9	-0.473555	0.175069	-2.70496	0.00683126	0.024667	chrX	4633198	4635420	-	CBG02172
2428	WBGene00025268	417.98	-0.538863	0.12686	-4.2477	2.15981e-05	0.000178641	chrX	4640601	4647035	+	Cbr-igcm-4
2429	WBGene00025269	40.6755	0.15818	0.344579	0.459052	0.646197	0.771885	chrX	4647724	4649790	+	CBG02174
2430	WBGene00025270	230.906	-1.55726	0.251947	-6.18092	6.37279e-10	1.47053e-08	chrX	4650140	4652538	+	CBG02175
2431	WBGene00025271	429.034	-0.904042	0.405782	-2.2279	0.025887	0.0724055	chrX	4652812	4653428	+	CBG02176
2432	WBGene00025272	340.548	-0.449149	0.135852	-3.30616	0.000945854	0.00466749	chrX	4653429	4656997	-	CBG02177
2433	WBGene00025273	8467.52	0.0666661	0.0783557	0.850813	0.394873	0.563585	chrX	4657230	4666541	-	CBG02178
2434	WBGene00025274	84.9431	-0.417057	0.215045	-1.9394	0.0524532	0.126245	chrX	4667372	4671595	-	CBG02179
2435	WBGene00025275	2.01076	0.0752197	0.34305	0.219267	0.826442	0.897475	chrX	4678071	4680741	-	Cbr-nrde-3.2
2436	WBGene00025276	0.280746	-0.0614231	0.172259	-0.356574	0.721411	NA	chrX	4693058	4693832	-	CBG02186
2437	WBGene00025277	0	NA	NA	NA	NA	NA	chrX	4694741	4695350	+	CBG02187
2438	WBGene00025278	0.852766	0.141377	0.289113	0.489003	0.62484	NA	chrX	4695677	4697510	-	CBG02188
2439	WBGene00025279	1.52256	0.164151	0.344271	0.476807	0.6335	NA	chrX	4700362	4701228	-	CBG02190
2440	WBGene00025280	2.2674	0.00468892	0.371935	0.0126068	0.989941	0.994859	chrX	4703894	4705352	-	CBG02191
2441	WBGene00025282	183.636	0.0708198	0.150412	0.470839	0.637755	0.765903	chrI	8245772	8249260	+	CBG02193
2442	WBGene00025283	1312.14	-0.80326	0.132659	-6.05509	1.40339e-09	3.02592e-08	chrI	8240805	8244399	-	Cbr-hpo-35
2443	WBGene00025284	425.412	0.256105	0.120037	2.13356	0.032879	0.0875575	chrI	8239702	8240140	-	Cbr-cox-19
2444	WBGene00025285	536.383	-0.241958	0.103017	-2.34871	0.0188384	0.0562331	chrI	8229353	8237998	+	Cbr-mgl-2
2445	WBGene00025286	2285.71	0.262463	0.0826714	3.17477	0.00149957	0.00691884	chrI	8217818	8220685	+	Cbr-cup-2
2446	WBGene00025287	1331.74	0.403955	0.173151	2.33296	0.0196502	0.0580735	chrI	8215013	8217113	-	CBG02199
2448	WBGene00025288	3832.23	-0.771985	0.119263	-6.47296	9.61006e-11	2.63251e-09	chrI	8204568	8208852	-	Cbr-blmp-1
2452	WBGene00025289	16.1321	0.232393	0.380161	0.611301	0.541	0.69221	chrI	8203396	8204021	+	CBG02202
2455	WBGene00025290	5.78296	-0.115218	0.42669	-0.270027	0.787139	0.871999	chrI	8201419	8202125	+	CBG02204
2456	WBGene00025291	371.156	-1.01043	0.153043	-6.60225	4.04952e-11	1.20629e-09	chrI	8195576	8200854	+	CBG02205
2457	WBGene00025292	2071.18	-0.43719	0.0933473	-4.68347	2.82054e-06	2.95738e-05	chrI	8192963	8195252	-	CBG02206
2458	WBGene00025293	91704.4	0.307324	0.0653718	4.70116	2.58683e-06	2.73683e-05	chrI	8189418	8192312	+	Cbr-pab-1
2460	WBGene00025294	38458.5	0.350936	0.0582721	6.02237	1.7188e-09	3.65968e-08	chrI	8188445	8189014	-	Cbr-rpl-30
2461	WBGene00025295	164.194	-0.246447	0.205272	-1.20059	0.229911	0.386587	chrI	8186999	8188404	+	Cbr-madf-10
2463	WBGene00025296	3848.39	0.120174	0.0680242	1.76663	0.0772902	0.170335	chrI	8182656	8186790	+	Cbr-pdpr-1
2464	WBGene00025297	561.377	-0.0955072	0.106162	-0.899633	0.368315	0.538351	chrI	8180919	8182664	+	CBG02211
2465	WBGene00025298	2328.78	-0.25802	0.0686989	-3.75581	0.000172783	0.00108457	chrI	8174716	8180666	-	Cbr-sec-8
2467	WBGene00025299	1181.24	-0.0347619	0.0745414	-0.466343	0.64097	0.767942	chrI	8173921	8174605	-	CBG02213
2468	WBGene00025300	199.412	0.259563	0.195223	1.32958	0.183658	0.327796	chrI	8170652	8173920	+	CBG02214
2470	WBGene00025301	1562.11	-0.27187	0.0725519	-3.74725	0.000178782	0.00111848	chrI	8165385	8169346	+	Cbr-duo-3
2471	WBGene00025302	28.342	-0.175533	0.332008	-0.528701	0.597013	0.736013	chrI	8164752	8165272	-	CBG02216
2473	WBGene00025303	582.289	-0.0953611	0.107416	-0.887774	0.374662	0.544804	chrI	8163444	8164546	+	CBG02217
2474	WBGene00025304	327.168	-0.18334	0.117126	-1.56533	0.117506	0.234525	chrI	8162381	8163375	+	Cbr-ska-1
2475	WBGene00025305	44.0401	-0.055858	0.263168	-0.212253	0.83191	0.901272	chrI	8160843	8161726	-	CBG02219
2476	WBGene00025306	572.982	-0.292042	0.119599	-2.44185	0.0146123	0.0457845	chrI	8158453	8160660	+	Cbr-row-1
2477	WBGene00025307	644.802	0.0958505	0.101313	0.946085	0.344105	0.512927	chrI	8152352	8156799	+	Cbr-mus-101
2478	WBGene00025309	7644.37	0.210354	0.0522636	4.02487	5.70073e-05	0.000414002	chrI	8144488	8145524	+	CBG02223
2480	WBGene00025310	649.013	-0.206077	0.124972	-1.64899	0.0991493	0.205914	chrI	8143508	8144402	+	Cbr-exos-3
2481	WBGene00025311	4.03794	0.472604	0.409376	1.15445	0.248316	0.407836	chrI	8141910	8142650	-	Cbr-nlp-4
2483	WBGene00025313	69.5478	-0.57008	0.268048	-2.12678	0.0334382	0.0886684	chrI	8136307	8139743	+	CBG02229
2484	WBGene00025314	62.4883	-0.383063	0.302455	-1.26651	0.20533	0.356163	chrI	8134748	8141094	-	Cbr-che-13
2485	WBGene00025315	741.03	-0.851685	0.113483	-7.50495	6.14543e-14	2.78133e-12	chrI	8131264	8134224	+	CBG02231
2486	WBGene00025316	14.3613	-0.661653	0.374794	-1.76538	0.0775	0.170657	chrI	8120334	8121755	-	CBG02233
2487	WBGene00025317	0.421854	-0.0096807	0.179568	-0.053911	0.957006	NA	chrI	8116550	8118630	-	Cbr-dhhc-12
2488	WBGene00025318	0	NA	NA	NA	NA	NA	chrI	8115682	8116518	-	CBG02235
2490	WBGene00025319	139.859	-0.2713	0.174841	-1.55169	0.120736	0.239592	chrI	8109516	8112885	+	Cbr-rmh-1
2491	WBGene00025320	648.644	0.158854	0.103959	1.52804	0.126502	0.248066	chrI	8108108	8109176	-	Cbr-cey-2.1
2492	WBGene00025321	140.19	-0.118287	0.168336	-0.702685	0.482252	0.643816	chrI	8103940	8105180	-	Cbr-him-3
2493	WBGene00025322	1016.57	0.0442374	0.0781305	0.566199	0.571259	0.716319	chrI	8102195	8103557	-	CBG02240
2497	WBGene00025323	1479.45	0.22374	0.0985529	2.27026	0.0231921	0.066293	chrI	8100985	8102194	+	Cbr-tli-1
2498	WBGene00025324	1809.72	0.578616	0.116383	4.97164	6.63888e-07	8.19451e-06	chrI	8091779	8098159	-	Cbr-snx-27
2500	WBGene00025325	4.89162	0.273119	0.42542	0.641999	0.520874	0.676248	chrI	8083499	8084629	+	CBG02243
2501	WBGene00025326	40.1136	0.203963	0.276677	0.737188	0.461008	0.624558	chrI	8084805	8085661	-	CBG02245
2502	WBGene00025327	431.397	-0.439767	0.417128	-1.05427	0.291758	0.457244	chrI	8074849	8076167	-	CBG02246
2503	WBGene00025328	55315.7	0.206253	0.0672777	3.06569	0.00217165	0.00947246	chrI	8073461	8075827	+	Cbr-ndk-1
2504	WBGene00025329	1655.22	-0.35027	0.13564	-2.58234	0.0098133	0.0333041	chrI	8069964	8073460	-	CBG02248
2506	WBGene00025330	510.665	-0.532408	0.132783	-4.00961	6.08186e-05	0.00043745	chrI	8068136	8069985	-	CBG02249
2508	WBGene00025331	64.3989	1.01223	0.24856	4.07239	4.65337e-05	0.000347643	chrI	8064941	8067777	+	CBG02250
2509	WBGene00025332	25.2276	1.49537	0.343294	4.35594	1.32497e-05	0.000116773	chrI	8063790	8064923	-	Cbr-sss-1
2511	WBGene00025333	2798.49	0.375802	0.14727	2.55179	0.0107173	0.0357694	chrI	8058661	8060510	-	Cbr-ubc-25
2512	WBGene00025334	4.65654	0.855679	0.395761	2.16211	0.0306099	0.0827137	chrI	8055578	8056140	+	CBG02253
2513	WBGene00025335	125.157	0.237883	0.205803	1.15588	0.247732	0.407278	chrI	8054182	8054560	-	CBG02254
2514	WBGene00025336	390.005	-0.178645	0.128035	-1.39528	0.162933	0.299801	chrI	8052924	8053919	+	CBG02255
2515	WBGene00025337	1771.8	-0.0435794	0.0763895	-0.57049	0.568345	0.713937	chrI	8046055	8051553	+	Cbr-rtel-1
2516	WBGene00025339	876.526	0.306496	0.0864235	3.54644	0.000390469	0.00218329	chrI	8044210	8045978	+	CBG02258
2518	WBGene00025340	54041.3	0.31969	0.0478516	6.68086	2.37539e-11	7.34452e-10	chrI	8043233	8044146	+	Cbr-tct-1
2519	WBGene00025341	149845	0.366578	0.0524163	6.99359	2.67934e-12	9.43847e-11	chrI	8042032	8043142	+	Cbr-rla-0
2520	WBGene00025342	5362.02	0.244362	0.0711979	3.43215	0.000598818	0.00315969	chrI	8039970	8041320	+	Cbr-pas-5
2521	WBGene00025344	0.202917	0.0587315	0.172057	0.34135	0.73284	NA	chrII	10804607	10804870	+	CBG02263
2522	WBGene00025345	838.509	0.0287008	0.0984976	0.291386	0.770756	0.862021	chrII	10802677	10803474	-	CBG02264
2523	WBGene00025346	4141.25	-0.0641141	0.0700114	-0.915767	0.359789	0.52915	chrII	10800112	10801007	-	CBG02265
2524	WBGene00025347	16.3829	-0.22053	0.405591	-0.543725	0.586631	0.7287	chrII	10796441	10797979	-	CBG02266
2525	WBGene00025348	6207.24	0.266535	0.0578088	4.61063	4.01446e-06	4.03968e-05	chrII	10793353	10795327	-	CBG02267
2526	WBGene00025349	109.684	0.0600706	0.199605	0.300948	0.763454	0.856885	chrII	10792051	10793255	-	Cbr-gst-9
2527	WBGene00025350	297.968	0.40896	0.207285	1.97293	0.0485031	0.118696	chrII	10790297	10793258	+	CBG02269
2528	WBGene00025351	9545.95	0.156164	0.0544263	2.86928	0.0041141	0.0161877	chrII	10788573	10790105	+	Cbr-sgt-1
2529	WBGene00025352	1860.92	-0.16261	0.0904369	-1.79805	0.0721687	0.161614	chrII	10781514	10787732	-	Cbr-btbd-10
2530	WBGene00025353	244.04	-0.048076	0.142684	-0.336941	0.736161	0.839181	chrII	10777808	10780351	+	Cbr-snpc-1.2
2534	WBGene00025354	42.0149	-0.216544	0.364668	-0.593809	0.55264	0.700975	chrII	10775623	10777572	-	CBG02274
2535	WBGene00025355	4347.86	0.380708	0.0672151	5.66402	1.47865e-08	2.61754e-07	chrII	10754934	10766120	+	Cbr-aagr-2
2536	WBGene00025356	97.5889	0.13883	0.21863	0.634998	0.52543	0.679574	chrII	10751869	10753138	+	Cbr-gst-30
2537	WBGene00025358	580.697	-0.45969	0.155631	-2.95371	0.00313983	0.0129129	chrII	10735945	10738352	-	CBG02280
2539	WBGene00025359	47.6826	0.930929	0.275095	3.38403	0.000714305	0.00368297	chrII	10735587	10736140	-	CBG02281
2540	WBGene00025360	695.72	-0.191314	0.114677	-1.66828	0.095261	0.199788	chrII	10731300	10732907	+	Cbr-mdt-4
2541	WBGene00025361	25.9115	0.126035	0.320063	0.39378	0.693743	0.808124	chrII	10734191	10734752	-	CBG02283
2542	WBGene00025362	3237.74	-0.156943	0.080717	-1.94436	0.0518517	0.125151	chrII	10728963	10731206	+	CBG02284
2543	WBGene00025363	1045.75	-0.0310317	0.105376	-0.294485	0.768387	0.860525	chrII	10726493	10728730	-	CBG02285
2544	WBGene00025364	16.3782	0.379217	0.386282	0.981709	0.326243	0.494499	chrII	10725626	10726346	+	CBG02286
2545	WBGene00025365	1585.21	-0.31791	0.0694784	-4.57567	4.74704e-06	4.70361e-05	chrII	10721721	10725334	-	Cbr-zyg-12
2547	WBGene00025366	328.96	0.0979108	0.142646	0.686389	0.492468	0.652757	chrII	10720806	10721616	-	Cbr-ndx-3
2548	WBGene00025367	4367.96	-0.0786943	0.072413	-1.08674	0.277151	0.442165	chrII	10719561	10721624	+	Cbr-pbs-3
2549	WBGene00025368	1823.62	-0.297301	0.0758103	-3.92165	8.79454e-05	0.000609452	chrII	10713455	10719373	+	Cbr-ulp-2
2551	WBGene00025369	557.724	-0.366645	0.103268	-3.55041	0.000384639	0.00215584	chrII	10687190	10700905	-	Cbr-shc-2
2552	WBGene00025371	4857.83	0.143128	0.0597924	2.39375	0.0166771	0.050942	chrII	10684629	10687192	+	Cbr-eif-1
2553	WBGene00025372	1038.19	0.0296368	0.0817887	0.362359	0.717084	0.82617	chrII	10683144	10684283	-	Cbr-vps-24
2554	WBGene00025373	11.2834	-0.353879	0.416835	-0.848966	0.3959	0.564575	chrII	10682293	10682815	+	CBG02296
2555	WBGene00025374	7.69895	0.26581	0.427707	0.621477	0.534286	0.686969	chrII	10680728	10682099	-	CBG02297
2556	WBGene00025375	13.68	1.16263	0.416797	2.78945	0.00527983	0.0199051	chrII	10679654	10680156	-	CBG02298
2561	WBGene00025376	4094.81	0.138073	0.0589943	2.34045	0.0192605	0.0572171	chrII	10664702	10671636	-	Cbr-nsy-1
2562	WBGene00025377	243.282	-0.119742	0.143408	-0.834977	0.40373	0.571946	chrII	10663548	10664701	+	CBG02300
2563	WBGene00025378	716.835	-0.107189	0.0880233	-1.21773	0.223327	0.37848	chrII	10661601	10663456	+	CBG02301
2564	WBGene00025379	416.288	0.192198	0.154631	1.24294	0.213889	0.366708	chrII	10659285	10661507	+	Cbr-lrr-1
2565	WBGene00025380	3579.28	-0.314429	0.068218	-4.60919	4.04247e-06	4.0635e-05	chrII	10655535	10658807	+	Cbr-golg-2
2566	WBGene00025381	158.105	-0.591092	0.279311	-2.11625	0.0343235	0.0905546	chrII	10654156	10655227	-	Cbr-try-1
2567	WBGene00025382	1671.02	-0.420892	0.108535	-3.87795	0.00010534	0.000705922	chrII	10635670	10638880	-	CBG02308
2568	WBGene00025383	45118.1	0.327572	0.0648204	5.05354	4.33704e-07	5.60823e-06	chrII	10634639	10635190	-	Cbr-rpl-22
2569	WBGene00025384	4494.76	0.395692	0.0677446	5.84094	5.19077e-09	1.00164e-07	chrII	10632587	10634724	+	Cbr-pho-12
2570	WBGene00025385	1744.28	-0.156991	0.0741004	-2.11862	0.0341225	0.0901006	chrII	10621782	10629634	-	Cbr-smc-5
2571	WBGene00025386	22.7235	-0.398967	0.338706	-1.17792	0.238829	0.39661	chrII	10620519	10621791	+	CBG02312
2572	WBGene00025387	0.965195	0.220241	0.264292	0.833325	0.404661	NA	chrII	10618147	10619086	-	CBG02313
2573	WBGene00025388	3.81539	0.536449	0.326054	1.64528	0.0999128	0.207064	chrII	10614356	10616120	+	CBG02314
2576	WBGene00025389	11.169	0.965623	0.425533	2.26921	0.0232555	0.0664337	chrII	10612926	10613635	+	CBG02315
2578	WBGene00025390	11.1035	0.949672	0.403046	2.35624	0.0184611	0.0553095	chrII	10608777	10609857	+	CBG02316
2580	WBGene00025391	944.877	0.157592	0.07962	1.9793	0.0477817	0.117276	chrII	10605620	10608752	+	Cbr-dsh-2
2581	WBGene00025392	801.898	0.0604108	0.123875	0.487674	0.625781	0.757054	chrII	10603064	10605302	+	CBG02319
2582	WBGene00025393	7668.38	-0.0592046	0.0549567	-1.0773	0.281348	0.446482	chrII	10596418	10602613	+	Cbr-pld-1
2583	WBGene00025394	0.109469	-0.0223768	0.172057	-0.130055	0.896523	NA	chrII	6802717	6803104	+	CBG02321
2584	WBGene00025395	19.0727	1.94704	0.386997	5.03114	4.87564e-07	6.19355e-06	chrII	10593548	10594379	-	CBG02322
2586	WBGene00025396	10.6014	0.566266	0.410546	1.3793	0.167802	0.306295	chrII	10587144	10587810	-	CBG02323
2587	WBGene00025397	0.562397	0.167509	0.194815	0.859837	0.389879	NA	chrII	10586376	10586951	+	CBG02324
2588	WBGene00025398	8.20473	0.491851	0.425893	1.15487	0.248144	0.407739	chrII	10585544	10586127	+	CBG02325
2589	WBGene00025399	1100.76	-0.351147	0.13441	-2.61251	0.00898812	0.0310205	chrII	10579589	10583428	-	Cbr-mpk-2
2590	WBGene00025400	51.2762	2.11213	0.422383	5.00051	5.7178e-07	7.12804e-06	chrII	10576727	10578417	-	CBG02328
2591	WBGene00025401	13.057	1.29833	0.410527	3.1626	0.00156369	0.00717935	chrII	10573947	10576177	-	CBG02329
2592	WBGene00025402	108.729	-1.09397	0.212364	-5.1514	2.58554e-07	3.51817e-06	chrII	10555843	10559887	-	Cbr-ggr-3
2594	WBGene00025403	44.9162	-0.550204	0.280709	-1.96005	0.0499896	0.121565	chrII	10551202	10553046	-	CBG02332
2595	WBGene00025404	74.703	-0.981044	0.300041	-3.2697	0.00107663	0.00521533	chrII	10547582	10551201	+	Cbr-nas-29
2596	WBGene00025405	460.335	-0.463995	0.107803	-4.30411	1.67659e-05	0.000143375	chrII	10544485	10545788	-	CBG02334
2597	WBGene00025406	98.6112	-0.106677	0.191137	-0.558117	0.576765	0.720269	chrII	10541766	10544068	+	Cbr-srb-16
2598	WBGene00025407	3.04826	0.338586	0.383998	0.881738	0.377918	0.547984	chrII	10538337	10539800	+	Cbr-srb-12
2599	WBGene00025408	0.405834	0.098241	0.172188	0.570544	0.568309	NA	chrII	10537317	10537729	+	CBG02337
2600	WBGene00025409	0.68658	0.0442244	0.240586	0.183819	0.854155	NA	chrII	10533256	10534489	+	Cbr-srb-13
2601	WBGene00025410	1.31086	0.435264	0.329878	1.31947	0.187012	NA	chrII	10530691	10532264	+	Cbr-srb-5
2602	WBGene00025411	1.28398	0.115854	0.340928	0.339821	0.733991	NA	chrII	10528509	10530197	+	Cbr-srb-3
2603	WBGene00025412	3.77547	0.295803	0.425087	0.695864	0.486514	0.647005	chrII	10523855	10525171	+	CBG02342
2605	WBGene00025413	5.88128	1.08963	0.42807	2.54546	0.0109135	0.0362885	chrII	10519161	10522280	-	CBG02343
2606	WBGene00025415	996.027	-0.116383	0.12173	-0.956071	0.339036	0.50808	chrII	10503369	10516404	+	Cbr-crh-2
2608	WBGene00025417	1.49832	0.517697	0.334854	1.54604	0.122096	NA	chrII	10498474	10501886	-	CBG02348
2609	WBGene00025418	11589.5	0.0561854	0.0848876	0.66188	0.508048	0.665778	chrII	10487864	10494059	-	Cbr-ampd-1
2610	WBGene00025419	897.395	-0.0221397	0.100102	-0.221171	0.82496	0.896333	chrII	10486224	10487868	+	CBG02350
2612	WBGene00025421	2601.06	-0.0175529	0.0976494	-0.179754	0.857345	0.91622	chrII	10474650	10485883	+	Cbr-dsh-1
2615	WBGene00025423	220.635	-0.296061	0.134827	-2.19586	0.0281023	0.0772524	chrII	10465330	10466974	-	CBG02355
2616	WBGene00025424	4173.83	-0.168416	0.13995	-1.2034	0.228821	0.385317	chrII	10463090	10465222	+	Cbr-pho-1
2617	WBGene00025425	1182.71	0.298602	0.105255	2.83692	0.00455505	0.0175939	chrII	10460804	10462855	+	Cbr-pho-4
2618	WBGene00025426	387.806	-0.0543452	0.222472	-0.244279	0.807015	0.88453	chrII	10456305	10459911	+	Cbr-ptr-6
2619	WBGene00025427	108.834	-0.756919	0.195259	-3.87649	0.000105976	0.000709676	chrII	10449112	10451844	+	Cbr-frpr-4
2621	WBGene00025428	303.782	-1.19092	0.142382	-8.36423	6.05097e-17	3.85636e-15	chrII	10434671	10436668	+	Cbr-drn-1
2623	WBGene00025429	6104.08	-0.190398	0.0885246	-2.15079	0.0314925	0.0846472	chrII	10421415	10426259	+	Cbr-pmt-1
2624	WBGene00025430	100.491	-0.223416	0.246924	-0.904796	0.365573	0.535262	chrII	10417071	10418924	-	Cbr-gur-5
2625	WBGene00025431	48.0151	-1.07462	0.286748	-3.74761	0.00017853	0.00111728	chrII	10415803	10416746	-	CBG02365
2626	WBGene00025432	2710.42	-0.351684	0.0742403	-4.7371	2.16801e-06	2.33998e-05	chrII	10388928	10396900	-	Cbr-gcy-12
2628	WBGene00025434	2296.71	0.813378	0.147437	5.51679	3.45246e-08	5.71961e-07	chrII	10366208	10385342	-	Cbr-vhp-1
2631	WBGene00025435	103.719	-0.814761	0.221599	-3.67673	0.000236241	0.00141919	chrII	10362951	10364552	+	CBG02373
2632	WBGene00025436	1312.8	0.101767	0.0737125	1.38059	0.167405	0.305837	chrII	10358956	10360164	-	CBG02374
2633	WBGene00025437	33.016	0.63838	0.325509	1.96118	0.0498586	0.121293	chrII	10356224	10357538	-	Cbr-srg-69
2634	WBGene00025438	550.887	0.00829166	0.117631	0.0704886	0.943805	0.968707	chrII	10355349	10356205	+	CBG02376
2635	WBGene00025439	2156.8	-0.160271	0.0797683	-2.0092	0.0445154	0.110827	chrII	10344400	10354140	-	Cbr-sec-6
2636	WBGene00025440	157.961	-0.893479	0.188964	-4.72831	2.26394e-06	2.4337e-05	chrII	10349091	10350258	+	CBG02378
2637	WBGene00025441	5192.63	0.26007	0.0611043	4.25617	2.07961e-05	0.00017295	chrII	10341080	10342564	-	CBG02379
2638	WBGene00025442	804.946	-0.200375	0.0985496	-2.03324	0.042028	0.105986	chrII	10339530	10340988	-	Cbr-algn-2
2639	WBGene00025443	1820.94	-0.424292	0.090311	-4.69813	2.62561e-06	2.7763e-05	chrII	10333925	10337140	-	Cbr-pkc-3
2640	WBGene00025444	52.8743	0.395296	0.316662	1.24832	0.211913	0.364203	chrII	10328232	10331824	+	Cbr-ccpp-6
2642	WBGene00025445	1817.72	0.101375	0.0729799	1.38909	0.164806	0.30221	chrII	10326808	10328183	+	Cbr-rsp-4
2643	WBGene00025446	407.344	0.17428	0.122873	1.41837	0.156082	0.290498	chrII	10325748	10326829	+	Cbr-ndx-6
2644	WBGene00025447	1434.47	0.243091	0.118366	2.05372	0.040003	0.101992	chrII	10323073	10325402	+	Cbr-pink-1
2645	WBGene00025448	2823.43	0.386992	0.130499	2.96548	0.00302215	0.012522	chrII	10317024	10320622	+	CBG02386
2646	WBGene00025449	4004.43	-0.177893	0.0668933	-2.65936	0.0078289	0.0276617	chrII	10312300	10316430	-	Cbr-mog-5
2647	WBGene00025450	21.0882	0.195904	0.334693	0.585325	0.558329	0.705803	chrII	10311041	10312321	+	Cbr-clec-141
2648	WBGene00025451	1.17115	0.285436	0.244235	1.16869	0.242527	NA	chrII	10309500	10309978	+	CBG02389
2649	WBGene00025452	24.6112	-0.388206	0.35907	-1.08114	0.279635	0.444554	chrII	10305379	10306313	-	CBG02391
2650	WBGene00025453	66.0302	-0.510658	0.251639	-2.02933	0.0424248	0.106757	chrII	10301186	10302586	-	CBG02393
2651	WBGene00025454	657.59	0.0760886	0.088698	0.857838	0.390982	0.560078	chrII	10297333	10298738	-	Cbr-tofu-6
2652	WBGene00025455	962.997	0.811487	0.202122	4.01483	5.94878e-05	0.000428536	chrII	10296151	10297332	+	CBG02395
2654	WBGene00025456	4020.43	-0.0381763	0.0744172	-0.513004	0.607949	0.744218	chrII	10292505	10296174	+	CBG02397
2657	WBGene00025457	8.14558	0.738673	0.419068	1.76266	0.0779579	0.171403	chrII	10290153	10291673	+	Cbr-srx-114
2658	WBGene00025458	81.6944	0.339524	0.336398	1.00929	0.312835	0.480004	chrII	10283972	10285520	+	Cbr-dct-5
2659	WBGene00025459	24.205	1.00837	0.328019	3.07412	0.00211122	0.00925982	chrII	10281452	10283191	-	CBG02400
2660	WBGene00025460	164.206	-0.456733	0.168367	-2.71273	0.00667312	0.0242221	chrII	10275252	10280808	+	Cbr-nmr-1
2661	WBGene00025461	75.1756	-0.0281462	0.247501	-0.113721	0.909459	0.949174	chrII	10272374	10273390	-	Cbr-cex-1
2662	WBGene00025462	1434.6	-0.754471	0.170214	-4.43247	9.31581e-06	8.49393e-05	chrII	10265310	10267444	-	Cbr-dhs-5
2663	WBGene00025463	187.134	0.0265529	0.152666	0.173928	0.861922	0.919517	chrII	10263348	10264754	-	Cbr-daz-1
2664	WBGene00025464	5505.07	-0.209522	0.073723	-2.84202	0.00448283	0.0173758	chrII	10251054	10257523	-	Cbr-clr-1
2667	WBGene00025465	180.833	-0.300311	0.176167	-1.7047	0.0882508	0.188311	chrII	10248503	10249442	+	CBG02406
2668	WBGene00025466	1502.73	0.139269	0.077896	1.78788	0.0737951	0.164491	chrII	10242994	10244129	-	Cbr-mrps-16
2669	WBGene00025467	1686.8	-0.218433	0.0763986	-2.85913	0.00424808	0.0166206	chrII	10240405	10242882	-	Cbr-ilcr-2
2670	WBGene00025468	618.081	-0.191158	0.100213	-1.90751	0.0564549	0.13383	chrII	10238332	10240101	-	CBG02409
2671	WBGene00025469	104.877	-0.411607	0.202389	-2.03374	0.0419777	0.105888	chrII	10237175	10238353	+	Cbr-cal-8
2672	WBGene00025470	3.0744	0.455518	0.3777	1.20603	0.227805	0.383986	chrII	10226975	10229705	-	Cbr-nep-5
2673	WBGene00025471	96.8455	-0.176837	0.223967	-0.78957	0.429779	0.596016	chrII	10225977	10226496	-	CBG02412
2674	WBGene00025473	19.0221	2.11116	0.375097	5.62829	1.82006e-08	3.16938e-07	chrII	10223924	10224418	+	CBG02414
2675	WBGene00025474	16.7917	1.35929	0.413671	3.28592	0.00101649	0.00497022	chrII	10222951	10223458	-	CBG02415
2676	WBGene00025475	128.341	-0.293318	0.175466	-1.67165	0.0945937	0.198722	chrII	10220413	10222955	+	CBG02416
2678	WBGene00025476	737.686	0.0426615	0.0852387	0.500495	0.616727	0.750852	chrII	10218182	10220372	-	Cbr-fzy-1
2679	WBGene00025477	467.78	-0.502809	0.113187	-4.44229	8.90052e-06	8.17896e-05	chrII	10216204	10218032	-	Cbr-cyp-44A1
2680	WBGene00025479	1070.03	0.0285187	0.0746045	0.382266	0.702264	0.814545	chrII	10210078	10212028	+	CBG02420
2681	WBGene00025480	0.967326	-0.051031	0.264033	-0.193275	0.846744	NA	chrII	10205263	10205849	-	CBG02421
2682	WBGene00025481	0	NA	NA	NA	NA	NA	chrII	10198462	10198796	-	CBG02425
2683	WBGene00025482	0	NA	NA	NA	NA	NA	chrII	10195084	10195739	-	CBG02426
2684	WBGene00025483	0	NA	NA	NA	NA	NA	chrII	10191263	10191597	+	CBG02427
2685	WBGene00025484	1.17278	-0.0157203	0.307114	-0.0511871	0.959176	NA	chrII	10188376	10189031	-	CBG02428
2686	WBGene00025485	0	NA	NA	NA	NA	NA	chrII	10182583	10183749	+	CBG02430
2687	WBGene00025486	1.82625	0.194483	0.207722	0.936265	0.349137	0.518489	chrII	10178504	10178951	-	CBG02432
2688	WBGene00025487	94.3679	-0.0502288	0.211846	-0.237101	0.812578	0.887981	chrII	10173984	10175956	-	Cbr-syp-1
2690	WBGene00025488	2.17538	0.215195	0.396247	0.543082	0.587073	0.729055	chrII	10165791	10167377	-	CBG02435
2691	WBGene00025491	109.733	2.4221	0.331222	7.31262	2.61975e-13	1.07882e-11	chrII	10152389	10153070	-	Cbr-ins-12
2692	WBGene00025492	214.826	0.566649	0.369759	1.53248	0.125403	0.246382	chrII	10149602	10150036	-	Cbr-ins-11
2693	WBGene00025493	35.5303	-0.281366	0.318892	-0.882323	0.377602	0.547696	chrII	10143518	10145256	-	CBG02441
2694	WBGene00025494	1037.58	-0.399861	0.147244	-2.71563	0.00661494	0.0240435	chrII	10139656	10141800	-	CBG02443
2695	WBGene00025495	67.1969	0.342916	0.395865	0.866246	0.386355	0.556165	chrII	10134266	10135865	-	CBG02445
2696	WBGene00025496	5.23958	0.362309	0.425699	0.851093	0.394718	0.563406	chrII	10132206	10134368	+	CBG02446
2697	WBGene00025497	1.60436	0.0627435	0.319287	0.196511	0.84421	NA	chrII	10129918	10131247	-	CBG02447
2701	WBGene00025498	8978.55	0.821628	0.0945295	8.69177	3.56851e-18	2.52314e-16	chrII	10118235	10128576	-	CBG02448
2702	WBGene00025499	518.973	0.411391	0.148913	2.76263	0.00573383	0.0213207	chrII	10122376	10125715	+	Cbr-cdc-14.1
2704	WBGene00025500	1453.28	0.383591	0.100431	3.81946	0.000133744	0.000868922	chrII	10119964	10121447	-	Cbr-ttc-4
2705	WBGene00025501	1614.36	0.391118	0.10887	3.59252	0.0003275	0.00187671	chrII	10111862	10115309	+	Cbr-cdc-14.2
2709	WBGene00025502	1688.48	0.305955	0.0785442	3.89532	9.80703e-05	0.000666259	chrII	10107361	10109208	-	CBG02453
2711	WBGene00025503	5.4981	-0.00213468	0.425124	-0.00502133	0.995994	0.998018	chrII	10103464	10106914	+	CBG02454
2712	WBGene00025504	1.24175	0.16403	0.336099	0.488042	0.62552	NA	chrII	10100429	10101491	+	CBG02455
2714	WBGene00025505	79.8713	0.0405324	0.300841	0.134731	0.892825	0.939297	chrII	10095924	10097025	+	CBG02456
2715	WBGene00025506	16.2841	0.149636	0.370867	0.403475	0.686599	0.802496	chrII	10084040	10087242	+	CBG02457
2716	WBGene00025507	2623.1	-0.117871	0.0840465	-1.40245	0.16078	0.29683	chrII	10077657	10083853	+	CBG02458
2717	WBGene00025508	360.966	0.0894935	0.144951	0.617403	0.536969	0.689122	chrII	10076757	10077468	+	Cbr-ddl-1
2718	WBGene00025509	726.344	-0.218379	0.0849053	-2.57203	0.0101103	0.0341019	chrII	10075636	10076465	+	Cbr-sam-4
2719	WBGene00025510	973.966	-0.0965314	0.112243	-0.86002	0.389778	0.559055	chrII	10070471	10074700	-	Cbr-zyg-1
2720	WBGene00025511	43.5032	0.42633	0.301366	1.41466	0.157169	0.29189	chrII	10071868	10072963	+	Cbr-bli-2
2721	WBGene00025512	2150.89	-0.368479	0.0741214	-4.97129	6.65083e-07	8.20386e-06	chrII	10067322	10070371	-	CBG02464
2722	WBGene00025513	821.111	-0.00545752	0.106289	-0.0513461	0.95905	0.976562	chrII	10064505	10066105	-	Cbr-ify-1
2724	WBGene00025514	573.518	-0.447126	0.145095	-3.08161	0.00205882	0.00905543	chrII	10062789	10064504	+	Cbr-fut-3
2725	WBGene00025515	139.403	-0.251456	0.194085	-1.2956	0.195113	0.343045	chrII	10061761	10062620	+	Cbr-ift-43.2
2726	WBGene00025516	884.876	-0.0400054	0.103804	-0.385393	0.699947	0.812773	chrII	10058164	10061422	-	CBG02468
2727	WBGene00025517	139.403	-0.251456	0.194085	-1.2956	0.195113	0.343045	chrII	10055833	10056692	+	Cbr-ift-43.1
2728	WBGene00025518	884.876	-0.0400054	0.103804	-0.385393	0.699947	0.812773	chrII	10052236	10055494	-	Cbr-mdt-26
2729	WBGene00025519	101.267	0.124144	0.201681	0.615544	0.538195	0.69001	chrII	10050369	10051242	-	CBG02471
2730	WBGene00025520	18.004	0.26909	0.380068	0.708004	0.478943	0.641226	chrII	10049785	10050241	-	CBG02472
2731	WBGene00025521	1310.46	0.043351	0.0985624	0.439833	0.660058	0.782407	chrII	10048296	10049640	+	CBG02473
2732	WBGene00025522	8318.41	-0.15311	0.0760428	-2.01347	0.044065	0.110131	chrII	10028876	10044828	+	CBG02475
2734	WBGene00025523	389.377	-0.12278	0.126206	-0.972852	0.330627	0.499231	chrII	10033863	10035426	-	Cbr-flp-27
2735	WBGene00025525	6012.07	0.161351	0.0675783	2.38761	0.0169581	0.0516573	chrII	10026714	10028778	+	CBG02478
2737	WBGene00025526	918.14	-0.467523	0.0803877	-5.81585	6.03271e-09	1.14061e-07	chrII	10024421	10026436	-	Cbr-eif-2D
2738	WBGene00025527	575.05	0.1455	0.0963639	1.5099	0.131068	0.254678	chrII	10023695	10024329	-	CBG02480
2740	WBGene00025528	347.775	1.03446	0.159351	6.49171	8.48677e-11	2.3628e-09	chrII	10021824	10023694	+	CBG02481
2741	WBGene00025529	835.244	0.314112	0.104904	2.99428	0.00275094	0.0115804	chrII	10005263	10009165	-	Cbr-osta-2
2744	WBGene00025530	4041.63	0.114214	0.0601359	1.89927	0.0575286	0.135826	chrII	10003160	10005262	+	Cbr-tiar-1
2745	WBGene00025531	3451.56	0.0833534	0.0753281	1.10654	0.268494	0.432049	chrII	10000504	10003046	-	CBG02485
2748	WBGene00025532	1263.8	-0.181715	0.081251	-2.23646	0.0253216	0.0711321	chrII	9998781	10000409	-	Cbr-zipt-3
2749	WBGene00025533	155.82	-0.372296	0.194546	-1.91367	0.0556628	0.132287	chrII	9997402	9998758	-	Cbr-damt-1
2750	WBGene00025534	2052.23	-0.154125	0.144542	-1.0663	0.286288	0.451227	chrII	9994142	9997404	+	Cbr-rab-3
2752	WBGene00025535	0.202917	0.0587315	0.172057	0.34135	0.73284	NA	chrII	9986834	9987767	-	CBG02490
2753	WBGene00025536	2.61773	-0.327899	0.386184	-0.849075	0.39584	0.564534	chrII	9979926	9980799	+	Cbr-hlh-14
2754	WBGene00025537	142.635	-0.253552	0.184561	-1.37381	0.1695	0.308635	chrII	9973985	9975153	+	CBG02492
2755	WBGene00025538	19099.6	0.194757	0.095246	2.04478	0.0408767	0.103711	chrII	9964556	9968376	-	Cbr-ifb-2
2757	WBGene00025540	13332.7	0.102051	0.0638013	1.59952	0.109706	0.222351	chrII	9949201	9957657	-	Cbr-ifb-1
2759	WBGene00025541	12.9038	-0.0389413	0.200702	-0.194025	0.846156	0.910546	chrII	9949221	9951753	+	Cbr-dmd-5
2760	WBGene00025542	866.111	-0.892353	0.148087	-6.02587	1.682e-09	3.58948e-08	chrII	9936319	9940763	-	CBG02498
2761	WBGene00025543	788.996	0.198955	0.100772	1.97432	0.0483456	0.118365	chrII	9926773	9929551	-	Cbr-lect-2
2762	WBGene00025544	30.0591	0.662521	0.363544	1.82239	0.0683954	0.155167	chrII	9924664	9926304	-	Cbr-acdh-8
2763	WBGene00025545	666.243	0.10216	0.121423	0.841355	0.400149	0.568818	chrII	9921924	9923968	+	CBG02502
2764	WBGene00025546	4.95055	0.576436	0.427338	1.3489	0.17737	0.319279	chrII	9916021	9916628	-	CBG02503
2765	WBGene00025547	125.79	-1.1	0.190901	-5.76214	8.30522e-09	1.52863e-07	chrII	9913337	9914544	-	CBG02504
2766	WBGene00025548	1615.49	-0.337912	0.0857237	-3.94187	8.08493e-05	0.000564619	chrII	9909497	9912262	-	Cbr-ehs-1
2767	WBGene00025549	8.67201	0.772307	0.426625	1.81027	0.070254	0.158469	chrII	9907916	9908556	+	CBG02506
2768	WBGene00025550	19.2851	0.977394	0.363041	2.69224	0.00709732	0.0254609	chrII	9904899	9906909	+	CBG02507
2769	WBGene00025551	1411.04	-0.0546922	0.0964123	-0.567274	0.570528	0.715624	chrII	9901285	9904693	+	Cbr-tbc-2
2770	WBGene00025552	405.328	-0.0453053	0.11105	-0.407973	0.683293	0.800329	chrII	9900219	9901306	+	CBG02509
2772	WBGene00025553	1172.97	-0.430762	0.0803887	-5.35849	8.39207e-08	1.27425e-06	chrII	9893622	9900048	+	CBG02510
2773	WBGene00025554	80.1444	0.325473	0.244906	1.32897	0.183857	0.328057	chrII	9898789	9899689	-	CBG02511
2774	WBGene00025555	107.423	-0.167	0.317746	-0.525577	0.599182	0.737446	chrII	9895244	9896780	-	Cbr-col-74
2775	WBGene00025557	3917.65	0.280538	0.0653051	4.2958	1.74062e-05	0.000147641	chrII	9890284	9893522	+	Cbr-fzo-1
2776	WBGene00025558	665.83	-0.447515	0.132863	-3.36823	0.000756511	0.00385933	chrII	9887344	9888901	+	CBG02516
2777	WBGene00025559	229.539	-0.242801	0.154075	-1.57587	0.115056	0.23079	chrII	9886427	9887275	+	CBG02517
2779	WBGene00025560	8250.86	0.353947	0.0751927	4.7072	2.51138e-06	2.66907e-05	chrII	9884242	9885498	+	Cbr-lec-5
2780	WBGene00025561	2.65268	0.9225	0.387501	2.38064	0.0172825	0.0524641	chrII	9879326	9880860	-	Cbr-nep-25
2781	WBGene00025562	414.439	-0.243442	0.184462	-1.31974	0.186921	0.332228	chrII	9874836	9877131	-	CBG02521
2782	WBGene00025563	11.5587	-1.03846	0.414643	-2.50448	0.0122631	0.0399121	chrII	9872584	9873972	+	CBG02522
2783	WBGene00025564	1271.17	-0.889417	0.110879	-8.02153	1.04436e-15	5.82388e-14	chrII	9866243	9869363	-	CBG02523
2784	WBGene00025565	339.757	-0.845456	0.169133	-4.99876	5.76995e-07	7.18349e-06	chrII	9864808	9866242	+	CBG02524
2785	WBGene00025566	32.281	0.678102	0.368116	1.84209	0.0654623	0.149876	chrII	9856267	9856934	-	CBG02525
2786	WBGene00025567	412.992	-0.768808	0.145752	-5.27475	1.32937e-07	1.91898e-06	chrII	9855016	9855708	-	CBG02526
2787	WBGene00025568	2267.42	0.31655	0.14744	2.14697	0.0317954	0.0852864	chrII	9847403	9854500	+	CBG02527
2792	WBGene00025569	6.31735	0.106543	0.42656	0.249772	0.802764	0.882153	chrII	9845330	9846873	+	CBG02528
2793	WBGene00025570	1568.64	0.0754264	0.107366	0.702519	0.482355	0.643908	chrII	9828729	9837385	-	Cbr-rfip-1
2794	WBGene00025571	257.955	0.138142	0.152698	0.904677	0.365636	0.535271	chrII	9813853	9823359	-	CBG02532
2795	WBGene00025572	2784.01	-0.296389	0.0767682	-3.86083	0.000113003	0.000750295	chrII	9806958	9810481	-	Cbr-vps-35
2796	WBGene00025573	2069.6	-0.386091	0.128222	-3.01111	0.00260292	0.0110341	chrII	9802043	9805582	-	Cbr-cgt-3
2797	WBGene00025574	266.631	0.21879	0.136628	1.60135	0.109299	0.221751	chrII	9800918	9801654	-	Cbr-frh-1
2798	WBGene00025575	2467.19	0.189513	0.0846481	2.23883	0.0251669	0.0707825	chrII	9797526	9800426	-	Cbr-ptp-2
2799	WBGene00025576	522.167	0.115364	0.151522	0.761365	0.446439	0.611783	chrII	9793690	9796029	-	Cbr-vrk-1
2800	WBGene00025577	1655.01	-0.119786	0.0733	-1.63419	0.102219	0.210887	chrII	9774623	9778851	-	Cbr-egl-44
2801	WBGene00025578	18.312	1.42769	0.425406	3.35607	0.000790599	0.0040058	chrII	9770161	9771480	-	CBG02542
2802	WBGene00025579	9.17489	0.697913	0.408298	1.70932	0.0873909	0.187008	chrII	9767583	9768135	-	CBG02544
2803	WBGene00025580	58.3514	-0.10274	0.288346	-0.356307	0.721611	0.828722	chrII	9764967	9766003	-	CBG02545
2805	WBGene00025581	8.03885	0.373783	0.426148	0.87712	0.380422	0.550459	chrII	9763121	9763541	-	CBG02546
2806	WBGene00025582	8497	-0.485867	0.0801519	-6.06183	1.34584e-09	2.91863e-08	chrII	9752602	9763039	+	Cbr-casy-1
2807	WBGene00025583	140.671	0.240339	0.227171	1.05796	0.290072	0.455466	chrII	9733385	9736071	-	CBG02550
2809	WBGene00025584	18.4438	-0.535913	0.38713	-1.38432	0.16626	0.30425	chrII	9731257	9733252	+	CBG02551
2811	WBGene00025585	1.94198	-0.163497	0.391293	-0.417838	0.676066	0.794446	chrII	9719404	9720076	-	Cbr-ins-2
2812	WBGene00025586	51.1366	-0.139119	0.308369	-0.451144	0.651886	0.775812	chrII	9717757	9718491	+	Cbr-ins-3
2813	WBGene00025587	59.108	-1.86448	0.333684	-5.58756	2.30281e-08	3.92475e-07	chrII	9713121	9713642	-	Cbr-ins-6.2
2816	WBGene00025588	84.9954	-1.63193	0.246193	-6.62866	3.38758e-11	1.01883e-09	chrII	9711470	9712187	-	Cbr-ins-6.1
2819	WBGene00025589	53.4498	-0.722232	0.246761	-2.92685	0.00342415	0.0139232	chrII	9706631	9707128	-	CBG02557
2821	WBGene00025590	2.3634	0.685286	0.363432	1.8856	0.0593489	0.139229	chrII	9704068	9705495	-	CBG02558
2823	WBGene00025591	113.54	-0.201237	0.227026	-0.886404	0.3754	0.545641	chrII	9695339	9698486	-	CBG02561
2824	WBGene00025592	779.018	-0.383362	0.0913745	-4.1955	2.72265e-05	0.000218103	chrII	9692455	9695346	+	CBG02562
2827	WBGene00025593	67.1717	-0.421403	0.22778	-1.85005	0.0643066	0.147915	chrII	9686139	9687686	+	Cbr-frpr-16
2828	WBGene00025594	18.7335	0.00801289	0.383937	0.0208703	0.983349	0.991006	chrII	9673473	9674064	+	CBG02566
2829	WBGene00025595	1006.12	0.129313	0.0828868	1.56011	0.118733	0.236393	chrII	9670951	9671985	+	CBG02567
2830	WBGene00025596	815.215	0.234686	0.155254	1.51163	0.130627	0.254108	chrII	9669043	9670985	+	CBG02568
2832	WBGene00025597	1799.46	0.187373	0.130385	1.43707	0.150698	0.283028	chrII	9667191	9668866	-	Cbr-ran-5
2833	WBGene00025598	10794	-0.260432	0.0945214	-2.75527	0.00586436	0.0217284	chrII	9659878	9665863	-	Cbr-gldc-1
2834	WBGene00025599	27.5152	-0.335201	0.322396	-1.03972	0.298471	0.464374	chrII	9655633	9657057	-	CBG02571
2835	WBGene00025600	6261.83	-0.451957	0.130238	-3.47023	0.000520007	0.0027926	chrII	9650871	9655589	+	Cbr-tpp-2
2836	WBGene00025601	474.696	-0.445731	0.102393	-4.35315	1.34192e-05	0.000117879	chrII	9648895	9650793	-	Cbr-rbbp-5
2837	WBGene00025602	126.414	-1.16726	0.214789	-5.43444	5.49702e-08	8.70055e-07	chrII	9637694	9648345	-	Cbr-rgs-3
2839	WBGene00025603	283.903	-1.39326	0.20028	-6.95657	3.48669e-12	1.20535e-10	chrII	9632821	9636276	+	CBG02575
2840	WBGene00025604	2502.67	-0.288518	0.0903509	-3.1933	0.00140655	0.00655052	chrII	9623694	9625391	-	CBG02576
2841	WBGene00025605	673.863	-0.0458859	0.113495	-0.404298	0.685994	0.802177	chrII	9620946	9623619	-	Cbr-rars-2
2842	WBGene00025607	1846.47	-0.383597	0.110025	-3.48645	0.000489473	0.00265603	chrII	9583048	9613205	-	Cbr-abts-3
2846	WBGene00025608	138.283	-1.03409	0.246572	-4.19385	2.74253e-05	0.000219414	chrII	9581856	9586070	+	Cbr-exp-1
2847	WBGene00025609	171.05	-0.378138	0.199417	-1.89622	0.0579314	0.136605	chrII	9576528	9578093	+	Cbr-hst-3.1
2849	WBGene00025610	16.3753	0.416975	0.37137	1.1228	0.261522	0.423773	chrII	9571839	9573825	-	CBG02584
2850	WBGene00025611	300.509	0.457878	0.146672	3.12178	0.00179761	0.00808492	chrII	9570401	9570997	-	CBG02585
2851	WBGene00025612	981.364	0.238707	0.119064	2.00486	0.0449775	0.111799	chrII	9559511	9564890	-	CBG02586
2852	WBGene00025613	158.726	-0.394826	0.181044	-2.18083	0.0291963	0.0796753	chrII	9556533	9558633	+	Cbr-fkh-8
2853	WBGene00025614	41.0561	1.28964	0.280717	4.59409	4.34647e-06	4.35042e-05	chrII	9551695	9553749	-	Cbr-cpb-2
2855	WBGene00025615	581.571	-0.0779349	0.120988	-0.644155	0.519475	0.675253	chrII	9550441	9551606	+	Cbr-rbmx-2
2856	WBGene00025616	703.59	0.00804196	0.101343	0.0793538	0.936751	0.965133	chrII	9549238	9550314	-	CBG02590
2858	WBGene00025617	254.61	-0.233268	0.141944	-1.64338	0.100305	0.207761	chrII	9543181	9546119	-	Cbr-szy-4
2860	WBGene00025618	13.318	0.120779	0.416622	0.2899	0.771893	0.862803	chrII	9541593	9543205	+	CBG02592
2861	WBGene00025619	322.583	-0.650146	0.146348	-4.44246	8.89344e-06	8.17647e-05	chrII	9531918	9536801	+	Cbr-daf-37
2864	WBGene00025620	8.28646	-0.0255476	0.420559	-0.0607468	0.951561	0.972871	chrII	9517553	9521337	+	CBG02597
2865	WBGene00025621	86.486	-0.307903	0.241182	-1.27664	0.201728	0.351673	chrII	9512576	9515823	+	CBG02598
2866	WBGene00025622	1977.05	0.690348	0.0846792	8.1525	3.56468e-16	2.10036e-14	chrII	9501268	9502439	+	CBG02600
2867	WBGene00025623	750.882	-0.216296	0.0917445	-2.35759	0.018394	0.0551632	chrII	9494406	9500170	+	Cbr-tat-4
2868	WBGene00025624	187.887	-0.119745	0.151003	-0.792999	0.427778	0.594076	chrII	9492006	9492781	-	Cbr-blos-4
2870	WBGene00025625	771.569	-0.20665	0.109898	-1.88037	0.0600577	0.140417	chrII	9490994	9491889	-	CBG02603
2871	WBGene00025626	6303.19	-0.34797	0.112009	-3.10661	0.00189244	0.00844622	chrII	9487445	9490898	-	CBG02604
2872	WBGene00025627	15614.7	0.0837115	0.0532374	1.57242	0.115853	0.231992	chrII	9485654	9486866	-	Cbr-phb-2
2873	WBGene00025628	140.231	0.313351	0.237511	1.31931	0.187066	0.332453	chrII	9481649	9486869	+	CBG02606
2876	WBGene00025629	295.682	-0.201885	0.138856	-1.45391	0.145971	0.276269	chrII	9477758	9479875	+	CBG02607
2877	WBGene00025630	342.04	-0.2222	0.115184	-1.92908	0.0537204	0.128667	chrII	9475382	9477390	-	Cbr-nmgp-1
2881	WBGene00025631	8.30498	-0.205841	0.425541	-0.483716	0.628587	0.759058	chrII	9474825	9475404	-	CBG02609
2882	WBGene00025632	76.5553	-0.350011	0.232039	-1.50841	0.131449	0.255321	chrII	9472671	9474861	+	CBG02610
2883	WBGene00025633	5590.38	-0.216658	0.116321	-1.8626	0.0625191	0.14505	chrII	9468577	9472278	-	CBG02611
2884	WBGene00025634	1538.24	-0.360567	0.0787017	-4.58143	4.61801e-06	4.59335e-05	chrII	9462037	9468372	-	Cbr-bpl-1
2885	WBGene00025635	178.855	-0.368098	0.184565	-1.99441	0.0461068	0.114022	chrII	9460455	9461982	+	CBG02613
2886	WBGene00025636	351.913	-0.128571	0.129834	-0.990276	0.322039	0.489869	chrII	9456265	9457523	-	CBG02614
2887	WBGene00025637	28.2042	-0.24624	0.326606	-0.753935	0.450888	0.616124	chrII	9453091	9454930	+	CBG02616
2888	WBGene00025638	6.65012	0.403875	0.427754	0.944177	0.345079	0.514012	chrII	9450511	9452021	-	CBG02617
2889	WBGene00025639	4852.88	0.665592	0.138624	4.80141	1.57556e-06	1.76457e-05	chrII	9446494	9448632	+	Cbr-upb-1
2890	WBGene00025640	39.3659	0.0821845	0.271109	0.303142	0.761782	0.855469	chrII	9442299	9444019	+	Cbr-mps-1
2891	WBGene00025641	4080.08	0.0937533	0.0789483	1.18753	0.23502	0.392462	chrII	9437594	9439487	-	CBG02620
2892	WBGene00025642	11.3517	0.627562	0.417851	1.50188	0.133129	0.257689	chrII	9436511	9437437	-	CBG02621
2893	WBGene00025643	117.391	-0.130397	0.182607	-0.714086	0.475174	0.637546	chrII	9432830	9436496	+	Cbr-glb-10
2895	WBGene00025644	3774.87	0.0074704	0.059697	0.125139	0.900414	0.944046	chrII	9421898	9424736	+	Cbr-efr-3
2896	WBGene00025645	6.71959	0.283553	0.426943	0.664147	0.506596	0.664899	chrII	9420191	9421612	+	CBG02626
2897	WBGene00025646	1523.38	-0.368661	0.0939873	-3.92246	8.76495e-05	0.000608255	chrII	9415073	9418449	-	Cbr-sma-6
2898	WBGene00025647	24.0269	-0.363898	0.358553	-1.01491	0.310151	0.476766	chrII	9411272	9412768	+	CBG02628
2899	WBGene00025648	1048.09	-0.38889	0.101906	-3.81615	0.000135551	0.000879131	chrII	9409127	9411180	+	Cbr-set-4
2900	WBGene00025649	108.57	-0.107928	0.201734	-0.535002	0.592648	0.732628	chrII	9406948	9409149	+	CBG02630
2901	WBGene00025650	1764.23	2.86986	0.230325	12.46	1.2333e-35	2.31083e-33	chrII	9400812	9403997	+	CBG02631
2902	WBGene00025651	4348.66	0.25823	0.0669327	3.85806	0.000114292	0.00075805	chrII	9396296	9396971	+	CBG02632
2906	WBGene00025652	5809.2	1.12064	0.179123	6.25625	3.94339e-10	9.47994e-09	chrII	9393449	9396295	+	Cbr-lgg-1
2907	WBGene00025653	1269.1	0.138314	0.0797466	1.73442	0.0828438	0.17945	chrII	9387375	9390033	+	CBG02634
2910	WBGene00025654	1512.24	0.266299	0.0877217	3.03573	0.00239955	0.0103049	chrII	9383481	9386808	+	CBG02635
2911	WBGene00025655	522.307	-0.767766	0.205563	-3.73495	0.000187754	0.00116674	chrII	9380339	9382957	+	CBG02636
2912	WBGene00025656	1216.8	-0.0639412	0.0788134	-0.811298	0.417195	0.584534	chrII	9378008	9378594	+	CBG02637
2913	WBGene00025657	885.887	0.307049	0.131705	2.33134	0.0197357	0.0582526	chrII	9373871	9377785	+	Cbr-ani-2
2914	WBGene00025658	1480.75	-0.015518	0.0804264	-0.192947	0.847001	0.910932	chrII	9370192	9373392	-	Cbr-ctsa-1
[truncated: 19,169 more rows]
