# Supplementary material for: Diversification of the Caenorhabditis heat shock response by Helitron transposable elements
Source: eLife. 2019 Dec 11;8:e51139. doi: 10.7554/eLife.51139 (PMC6927752; doi:10.7554/eLife.51139)
Supplement: Supplementary file 8. — List of HSR genes containing Helitron independent HSEs (Hin-HSEs) and Helitron acquired (Hac-HSEs) in C. elegans and C. briggsae. [file elife-51139-supp8.xlsx]

## Sheet: Supplemental.Table.8_Cel.HS.UP
WB.ID	gene.name	BaseMean	log2.FC.	StdErr	Wald.Stats	P.value	P.adj	chrom	start	end	strand	Cbr.ortholog.WB.ID	Cbr.ortholog.gene.name	upstream.Hac.HSEs	upstream.Hin.HSEs	Cbr.HS.UP	upstream.min.Tajimas.D
WBGene00077696	marc-1	55.4347	3.60336	0.364803	9.87757	5.20829e-23	3.94771e-21	chrV	9739702	9740894	+	WBGene00038590	CBG19351	FALSE	FALSE	FALSE	-2.22
WBGene00000019	abt-1	30.4205	2.38644	0.346578	6.88573	5.74926e-12	1.39657e-10	chrIV	10206189	10214911	-	WBGene00026264	Cbr-abt-1	FALSE	FALSE	FALSE	-2.01
WBGene00000033	abu-10	99.8122	1.41933	0.263709	5.38219	7.35835e-08	8.90756e-07	chrX	3798179	3799741	+	WBGene00034839	Cbr-abu-10	FALSE	FALSE	FALSE	-2.02
WBGene00016064	acd-1	69.6095	1.08055	0.287707	3.75573	0.000172835	0.000939078	chrI	4103713	4108045	+	WBGene00033075	Cbr-acd-1	FALSE	FALSE	FALSE	-1.88
WBGene00016491	acdh-5	13.9072	2.65184	0.400474	6.62175	3.54965e-11	7.5838e-10	chrI	6784854	6787139	+	NaN	NaN	FALSE	FALSE	FALSE	-2.25
WBGene00019406	acdh-8	14.223	2.02051	0.403312	5.0098	5.4487e-07	5.5542e-06	chrII	5794495	5796185	+	WBGene00025544	Cbr-acdh-8	FALSE	FALSE	FALSE	-1.96
WBGene00019920	acs-15	32.9386	3.39867	0.368401	9.22546	2.82345e-20	1.7663e-18	chrII	933018	936989	+	WBGene00027072	Cbr-acs-18	TRUE	FALSE	TRUE	-2.25
WBGene00011173	acs-18	69.0686	4.64746	0.3438	13.5179	1.22555e-41	2.35655e-39	chrIV	10310772	10313670	-	WBGene00027072	Cbr-acs-18	FALSE	FALSE	FALSE	-2.15
WBGene00022849	acs-6	31.7165	1.54764	0.310092	4.99089	6.0101e-07	6.06555e-06	chrII	7061999	7064777	+	WBGene00038149	Cbr-acs-10	FALSE	FALSE	FALSE	-1.9
WBGene00000082	adt-1	189.78	1.06733	0.220448	4.84166	1.28758e-06	1.19817e-05	chrX	12678832	12689279	+	WBGene00023580	Cbr-adt-1	FALSE	TRUE	FALSE	-0.63
WBGene00000097	aip-1	2811.7	2.70118	0.307017	8.79813	1.39114e-18	7.51831e-17	chrV	14012333	14013644	+	WBGene00032523	Cbr-aip-1	FALSE	TRUE	TRUE	-2.1
WBGene00006449	alg-4	5.94336	1.51442	0.399862	3.78736	0.000152258	0.000838496	chrIII	9887210	9891458	-	WBGene00031445	CBG09950	FALSE	FALSE	FALSE	0.7
WBGene00000134	amt-2	150.358	1.90756	0.19095	9.98985	1.68838e-23	1.37074e-21	chrIV	13042391	13046858	+	WBGene00042212	Cbr-amt-2	FALSE	FALSE	TRUE	-2.23
WBGene00020140	ant-1.4	11.4877	1.94778	0.405493	4.80349	1.55923e-06	1.41775e-05	chrIV	8459178	8460327	-	WBGene00026523	CBG03723	FALSE	FALSE	FALSE	-2.09
WBGene00000173	aqp-5	35.6329	1.01051	0.298269	3.3879	0.000704299	0.00316883	chrV	10491743	10493268	+	WBGene00031159	Cbr-aqp-5	FALSE	FALSE	FALSE	-2.26
WBGene00013043	arrd-16	117.751	1.84848	0.1995	9.26554	1.94096e-20	1.23109e-18	chrIII	12484732	12488339	+	WBGene00270527	CBG30289	TRUE	FALSE	FALSE	-1.42
WBGene00009853	arrd-27	253.128	3.81473	0.207467	18.3871	1.66577e-75	7.2449e-73	chrX	13980840	13981629	+	NaN	NaN	FALSE	FALSE	FALSE	-1.77
WBGene00006429	arrd-3	58.5907	2.76623	0.295708	9.35458	8.39329e-21	5.51512e-19	chrII	9412565	9414144	+	NaN	NaN	FALSE	FALSE	FALSE	-1.52
WBGene00012467	arrd-8	32.424	3.4429	0.364629	9.4422	3.65049e-21	2.4516e-19	chrII	12065085	12067568	+	WBGene00024305	Cbr-arrd-8	FALSE	FALSE	TRUE	-0.67
WBGene00012137	asic-2	274.914	2.34928	0.192558	12.2004	3.09232e-34	4.70728e-32	chrI	7480108	7483392	+	WBGene00032913	Cbr-asic-2	FALSE	FALSE	FALSE	-2.2
WBGene00012681	asp-15	9.31589	2.21324	0.405559	5.45726	4.83526e-08	6.06216e-07	chrV	19043215	19044853	-	WBGene00039341	CBG20332	FALSE	FALSE	FALSE	-2.45
WBGene00012682	asp-16	5.12299	1.31782	0.398585	3.30625	0.000945535	0.00409291	chrV	19039058	19042605	-	WBGene00039341	CBG20332	FALSE	FALSE	FALSE	-2.4
WBGene00015003	B0034.2	7.76016	1.82746	0.401372	4.55303	5.28788e-06	4.24775e-05	chrII	5944196	5944368	-	NaN	NaN	FALSE	FALSE	FALSE	-1.63
WBGene00044644	B0205.13	100.976	1.39235	0.278812	4.99385	5.91882e-07	5.99599e-06	chrI	10727755	10728808	-	WBGene00033705	CBG12814	FALSE	FALSE	TRUE	-1.4
WBGene00015026	B0207.1	9.25419	1.65179	0.403126	4.09746	4.17704e-05	0.000269333	chrI	5965062	5967211	+	WBGene00026761	CBG04012	FALSE	FALSE	FALSE	-1.88
WBGene00015034	B0207.11	5.09743	1.30053	0.39787	3.26873	0.0010803	0.00457329	chrI	5962953	5964183	-	WBGene00026785	CBG04039	FALSE	FALSE	FALSE	-1.9
WBGene00015051	B0218.7	7.83378	1.77586	0.403367	4.40259	1.06965e-05	7.99482e-05	chrIV	8164590	8166050	-	WBGene00035920	CBG15778	FALSE	FALSE	FALSE	-1.68
WBGene00015065	B0228.8	77.8133	4.37629	0.329361	13.2872	2.74663e-40	4.96759e-38	chrII	7759710	7761540	-	WBGene00033819	CBG12966	FALSE	FALSE	TRUE	-1.59
WBGene00015066	B0228.9	71.7102	4.31715	0.343252	12.5772	2.81842e-36	4.59679e-34	chrII	7762062	7763669	-	WBGene00033818	CBG12965	FALSE	FALSE	TRUE	-1.54
WBGene00015086	B0244.11	6.73348	1.32095	0.40533	3.25895	0.00111827	0.00471329	chrIII	5767882	5768665	+	NaN	NaN	FALSE	FALSE	FALSE	-1.29
WBGene00206513	B0244.15	9.33812	1.64711	0.405283	4.06409	4.82192e-05	0.000307334	chrIII	5743384	5744820	+	WBGene00030755	CBG09093	FALSE	FALSE	FALSE	-1.07
WBGene00015084	B0244.9	5.33296	1.53396	0.393839	3.8949	9.82386e-05	0.000572234	chrIII	5730118	5731030	-	WBGene00030682	CBG09008	FALSE	FALSE	FALSE	-1.25
WBGene00015106	B0280.11	15.5546	2.30803	0.40072	5.75972	8.42554e-09	1.2138e-07	chrIII	7136510	7138278	-	WBGene00029880	CBG08005	FALSE	FALSE	FALSE	-1.65
WBGene00015108	B0281.1	4.16113	1.25807	0.380528	3.3061	0.000946027	0.0040931	chrII	2313067	2314927	+	NaN	NaN	FALSE	FALSE	FALSE	0.02
WBGene00015151	B0348.1	8.68478	2.05113	0.405604	5.05699	4.25921e-07	4.46118e-06	chrV	48922	49619	+	WBGene00028657	CBG06365	FALSE	TRUE	FALSE	-2.24
WBGene00015165	B0361.11	18.6004	2.26154	0.390033	5.79833	6.69766e-09	9.80338e-08	chrIII	7277604	7281217	+	WBGene00042323	CBG24144	FALSE	FALSE	FALSE	-1.18
WBGene00007156	B0379.2	26.2123	3.41188	0.380468	8.96758	3.031e-19	1.74111e-17	chrI	10070923	10071900	-	WBGene00026592	CBG03810	FALSE	FALSE	FALSE	-2.39
WBGene00007159	B0379.7	36.6776	3.65407	0.36341	10.055	8.73573e-24	7.31998e-22	chrI	10072578	10074399	-	WBGene00032093	CBG10824	FALSE	FALSE	FALSE	-2.42
WBGene00015170	B0410.1	61.8382	2.19163	0.293038	7.47899	7.48958e-14	2.35072e-12	chrX	2894573	2895244	+	NaN	NaN	FALSE	FALSE	FALSE	-1.14
WBGene00007179	B0457.4	5.59184	1.34405	0.40307	3.33452	0.000854454	0.00373964	chrII	8910913	8912029	-	NaN	NaN	FALSE	FALSE	FALSE	-1.57
WBGene00015210	B0496.1	32.6239	2.86431	0.350455	8.17312	3.00523e-16	1.26199e-14	chrIV	7446390	7447466	+	WBGene00028235	CBG05867	FALSE	FALSE	TRUE	-1.85
WBGene00015211	B0496.2	32.9202	2.47903	0.364265	6.80558	1.00639e-11	2.36905e-10	chrIV	7447856	7449169	+	WBGene00028235	CBG05867	FALSE	TRUE	FALSE	-1.85
WBGene00015241	B0524.2	5.31003	1.23182	0.399659	3.08217	0.00205495	0.00793946	chrIII	1894057	1899856	+	WBGene00035486	CBG15159	FALSE	FALSE	FALSE	-1.71
WBGene00015242	B0524.3	25.5985	1.67623	0.340867	4.91755	8.76319e-07	8.48765e-06	chrIII	1887558	1889691	+	NaN	NaN	FALSE	FALSE	FALSE	-1.84
WBGene00015243	B0524.4	8.18216	1.80255	0.405368	4.44669	8.72029e-06	6.67617e-05	chrIII	1883607	1886218	-	WBGene00024128	CBG00796	FALSE	TRUE	TRUE	-1.84
WBGene00015467	basl-1	17.4333	1.8172	0.370568	4.90384	9.39821e-07	9.03088e-06	chrIII	5614972	5617257	+	NaN	NaN	FALSE	FALSE	FALSE	-1.54
WBGene00020859	bath-25	13.7708	2.22295	0.396412	5.60767	2.05069e-08	2.75441e-07	chrI	10876209	10877695	+	WBGene00030237	Cbr-bath-25	FALSE	FALSE	FALSE	-2.1
WBGene00012195	bath-34	2163.17	5.39592	0.137021	39.3803	0	0	chrI	12749890	12752087	+	NaN	NaN	FALSE	FALSE	FALSE	-1.87
WBGene00013569	bath-36	111.044	1.38145	0.217673	6.34648	2.20303e-10	4.13594e-09	chrV	15187989	15189588	+	NaN	NaN	FALSE	TRUE	FALSE	-2.5
WBGene00255598	BE0003N10.6	13.5417	1.38956	0.388771	3.57424	0.000351252	0.00172807	chrIII	1056263	1060061	-	NaN	NaN	FALSE	TRUE	FALSE	-1.58
WBGene00007211	BE10.3	44.3729	1.06926	0.305688	3.49787	0.00046899	0.00221772	chrIII	12808026	12811650	+	NaN	NaN	FALSE	FALSE	FALSE	-1
WBGene00008821	best-12	4.68101	1.41709	0.389197	3.64106	0.00027152	0.00138466	chrV	16049492	16051554	+	WBGene00032033	CBG10746	FALSE	FALSE	FALSE	-1.83
WBGene00007204	best-2	7.82785	1.48713	0.405585	3.66663	0.000245765	0.00127721	chrIV	13111520	13113082	-	NaN	NaN	FALSE	TRUE	FALSE	-2.12
WBGene00017723	bgnt-1.2	7.98322	1.7372	0.404813	4.29136	1.77581e-05	0.000126025	chrV	2115490	2118644	-	NaN	NaN	FALSE	FALSE	FALSE	-1.66
WBGene00000256	bli-6	19.0652	1.27243	0.382856	3.32352	0.000888888	0.00387156	chrIV	6377065	6378195	+	WBGene00027906	Cbr-bli-6	FALSE	FALSE	FALSE	-1.73
WBGene00019313	btb-10	41.0518	1.57846	0.321844	4.90443	9.36997e-07	9.00848e-06	chrII	1059664	1060802	-	NaN	NaN	FALSE	FALSE	FALSE	-1.3
WBGene00019700	btb-11	6.19118	1.41244	0.393864	3.58613	0.000335627	0.00166059	chrII	1023693	1024784	-	NaN	NaN	FALSE	TRUE	FALSE	-1.6
WBGene00022555	btb-12	14.3562	1.18848	0.378934	3.13639	0.00171043	0.00678915	chrII	1655217	1656148	+	NaN	NaN	FALSE	FALSE	FALSE	-1.3
WBGene00022561	btb-13	18.5087	1.68463	0.372653	4.52063	6.16566e-06	4.86304e-05	chrII	1653775	1654732	-	NaN	NaN	FALSE	TRUE	FALSE	-1.35
WBGene00020802	btb-2	10.1226	1.25148	0.399148	3.13538	0.00171633	0.0068068	chrII	6401949	6403102	+	WBGene00028583	CBG06281	FALSE	FALSE	FALSE	-1.89
WBGene00021042	btb-5	21.9025	2.16892	0.378474	5.73069	1.00022e-08	1.41966e-07	chrIII	59869	61166	-	NaN	NaN	FALSE	FALSE	FALSE	-0.73
WBGene00007230	C01G10.1	20.7547	2.74935	0.390249	7.04512	1.85301e-12	4.84943e-11	chrV	15099747	15104389	+	WBGene00027459	CBG04861	FALSE	FALSE	FALSE	-1.91
WBGene00015305	C01G5.3	4.07403	1.18951	0.386867	3.07473	0.00210697	0.00811639	chrIV	6536179	6537671	+	WBGene00039745	CBG20831	FALSE	TRUE	FALSE	-2.12
WBGene00015306	C01G5.4	16.5394	2.77379	0.395073	7.02095	2.20363e-12	5.71785e-11	chrIV	6531750	6535677	+	NaN	NaN	FALSE	FALSE	FALSE	-2.06
WBGene00007229	C01G6.9	18.921	1.21589	0.37684	3.22653	0.00125301	0.00520318	chrII	9294029	9295753	-	WBGene00024203	CBG00884	FALSE	FALSE	FALSE	-1.73
WBGene00007259	C02B4.3	4.07912	1.19801	0.387078	3.095	0.00196811	0.00765738	chrX	12658476	12661062	-	NaN	NaN	FALSE	FALSE	FALSE	-1.06
WBGene00015351	C02F5.10	16.2464	1.11012	0.363224	3.0563	0.00224086	0.00855953	chrIII	8248685	8249512	-	WBGene00042811	CBG24774	FALSE	FALSE	FALSE	-1.84
WBGene00015348	C02F5.5	16.3957	2.28837	0.389484	5.8754	4.21824e-09	6.4589e-08	chrIII	8236126	8236908	+	WBGene00041949	CBG23643	FALSE	FALSE	FALSE	-1.97
WBGene00007269	C03C10.2	16.5276	1.97659	0.396322	4.98733	6.12181e-07	6.14772e-06	chrIII	4091126	4093311	+	NaN	NaN	FALSE	TRUE	FALSE	-1.64
WBGene00007271	C03C10.5	5.32806	1.56999	0.395385	3.97079	7.16344e-05	0.000432577	chrIII	4089766	4092120	-	NaN	NaN	FALSE	FALSE	FALSE	-1.69
WBGene00007322	C05B5.5	79.0924	1.06479	0.234114	4.54818	5.4112e-06	4.33545e-05	chrIII	10001400	10003856	+	WBGene00031425	CBG09922	FALSE	FALSE	FALSE	-1.76
WBGene00015516	C06A8.6	62.0242	2.7397	0.291022	9.41407	4.77283e-21	3.1936e-19	chrII	7772499	7773914	+	WBGene00033815	CBG12962	FALSE	TRUE	TRUE	-1.07
WBGene00015517	C06A8.8	655.292	1.05587	0.176459	5.98368	2.18156e-09	3.51415e-08	chrII	7765545	7772017	-	WBGene00033816	CBG12963	FALSE	FALSE	TRUE	-1.07
WBGene00007360	C06B3.1	4.71934	1.26549	0.397128	3.18659	0.0014396	0.00586205	chrV	13902795	13903886	+	WBGene00032557	CBG11443	FALSE	TRUE	TRUE	-2.51
WBGene00007366	C06B3.7	232.216	2.89536	0.378736	7.6448	2.09272e-14	6.98862e-13	chrV	13909686	13911524	+	WBGene00032552	CBG11438	FALSE	FALSE	TRUE	-2.55
WBGene00007374	C06C3.3	63.7699	1.87129	0.272961	6.85553	7.105e-12	1.70548e-10	chrII	9369178	9372485	-	WBGene00032292	CBG11112	FALSE	FALSE	FALSE	-1.44
WBGene00015522	C06E1.7	40.9819	1.23015	0.307777	3.99691	6.41755e-05	0.000394845	chrIII	8591239	8593720	-	NaN	NaN	FALSE	FALSE	FALSE	-1.11
WBGene00015544	C06E8.5	167.682	1.70274	0.203632	8.36185	6.17428e-17	2.77797e-15	chrIII	7002301	7005450	-	WBGene00036420	CBG16502	FALSE	FALSE	FALSE	-0.96
WBGene00015564	C07D8.5	16.4712	1.66134	0.376502	4.41256	1.02157e-05	7.68261e-05	chrX	7344047	7344551	+	NaN	NaN	FALSE	TRUE	FALSE	-1.6
WBGene00015592	C08D8.1	73.722	1.49085	0.262098	5.68816	1.28416e-08	1.79203e-07	chrV	8345759	8349909	+	WBGene00032424	CBG11284	FALSE	FALSE	FALSE	-2.16
WBGene00007438	C08E8.2	24.9168	3.11612	0.379591	8.20914	2.22786e-16	9.46428e-15	chrV	18353510	18355842	-	NaN	NaN	FALSE	FALSE	FALSE	-2.02
WBGene00007439	C08E8.3	24.6325	1.66455	0.347046	4.79635	1.61582e-06	1.46337e-05	chrV	18350148	18350464	+	WBGene00037368	CBG17853	FALSE	FALSE	TRUE	-1.7
WBGene00007440	C08E8.4	63.4803	1.32249	0.26486	4.99316	5.94008e-07	6.00817e-06	chrV	18371846	18373528	+	WBGene00042085	CBG23827	FALSE	FALSE	FALSE	-2.28
WBGene00007448	C08F8.6	7.22596	1.33947	0.405533	3.303	0.000956571	0.00413285	chrIV	11162768	11164622	-	WBGene00034483	CBG13774	FALSE	FALSE	FALSE	-1.82
WBGene00015624	C09B8.5	12.3918	1.52473	0.392929	3.88043	0.000104272	0.000600485	chrX	6020866	6022569	-	WBGene00032370	CBG11209	FALSE	FALSE	FALSE	-0.99
WBGene00015630	C09B9.7	9.43841	1.85037	0.405534	4.5628	5.04759e-06	4.08082e-05	chrIV	5056973	5061012	-	NaN	NaN	FALSE	FALSE	FALSE	-1.87
WBGene00220250	C09B9.85	6.41365	1.51718	0.398315	3.809	0.000139528	0.000774465	chrIV	5021188	5025746	-	WBGene00032033	CBG10746	FALSE	FALSE	FALSE	-1.73
WBGene00015634	C09D4.3	16.4271	1.59016	0.384278	4.13804	3.50283e-05	0.000230415	chrI	5488309	5490626	+	WBGene00033423	CBG12477	FALSE	FALSE	TRUE	-2.09
WBGene00007478	C09F9.1	12.3222	1.67737	0.404501	4.14676	3.37211e-05	0.000223182	chrII	14698701	14699362	+	WBGene00026977	CBG04266	FALSE	FALSE	FALSE	-1.09
WBGene00007506	C10C5.2	62.8493	1.89548	0.321431	5.89702	3.70128e-09	5.7056e-08	chrIV	9371508	9373636	+	WBGene00031860	CBG10476	FALSE	FALSE	TRUE	-2.2
WBGene00007512	C10C6.3	11.2541	2.19017	0.405532	5.40074	6.63648e-08	8.12524e-07	chrIV	11463609	11465189	-	WBGene00032613	CBG11503	FALSE	FALSE	TRUE	-2.13
WBGene00015688	C10G11.8	10.0396	1.82821	0.403141	4.53491	5.76275e-06	4.57991e-05	chrI	6271866	6273780	-	WBGene00032256	CBG11069	FALSE	TRUE	FALSE	-2.13
WBGene00015681	C10G8.2	8.38918	1.48416	0.404803	3.66637	0.000246014	0.00127814	chrV	5314404	5315589	+	WBGene00271249	CBG30519	FALSE	FALSE	FALSE	-1.72
WBGene00015682	C10G8.3	9.84183	1.38901	0.405568	3.42484	0.000615155	0.00281673	chrV	5312890	5314289	+	WBGene00028990	CBG06766	FALSE	FALSE	TRUE	-1.69
WBGene00007521	C11E4.7	16.0165	1.36301	0.378337	3.60263	0.000315012	0.0015748	chrX	9617219	9619122	+	NaN	NaN	FALSE	FALSE	FALSE	-1.5
WBGene00007525	C11G10.1	90.5751	1.61616	0.31431	5.14194	2.71912e-07	2.9548e-06	chrX	15157359	15158749	-	WBGene00029607	CBG07621	FALSE	FALSE	TRUE	-1.72
WBGene00007540	C12D8.13	8.93328	1.30717	0.40555	3.2232	0.00126766	0.00525682	chrV	10219455	10220470	-	WBGene00031113	CBG09549	FALSE	TRUE	FALSE	-2.15
WBGene00007553	C13G3.1	743.09	3.94512	0.172396	22.8841	6.68807e-116	5.09046e-113	chrV	11011589	11012465	-	WBGene00041497	CBG23073	FALSE	TRUE	TRUE	-2.19
WBGene00007563	C14A4.13	15.6064	1.31456	0.373357	3.52091	0.000430062	0.00205869	chrII	10618471	10620503	+	WBGene00025995	CBG03054	FALSE	FALSE	FALSE	-1.78
WBGene00007559	C14A4.8	12.0831	1.76665	0.405423	4.35755	1.31527e-05	9.62199e-05	chrII	10597174	10598100	-	WBGene00025775	CBG02790	FALSE	FALSE	FALSE	-1.73
WBGene00007584	C14C10.1	10.8486	1.52363	0.397235	3.8356	0.00012526	0.000704474	chrV	12588309	12589644	+	WBGene00041871	CBG23535	FALSE	FALSE	FALSE	-1.9
WBGene00015772	C14E2.3	8.02492	1.70486	0.404562	4.21409	2.50782e-05	0.00017119	chrX	1810686	1811536	-	NaN	NaN	FALSE	FALSE	FALSE	-1.86
WBGene00015780	C14F11.4	55.071	1.17791	0.284102	4.14608	3.38221e-05	0.000223608	chrX	6230920	6233048	-	WBGene00027568	CBG05008	FALSE	FALSE	TRUE	-2.01
WBGene00015782	C14F11.7	21.7579	1.73284	0.352098	4.92147	8.58971e-07	8.33989e-06	chrX	6208161	6208563	-	NaN	NaN	FALSE	FALSE	FALSE	-1.93
WBGene00007597	C15A11.2	13.7338	1.15135	0.380278	3.02766	0.00246459	0.0092578	chrI	7384398	7388792	+	WBGene00023838	CBG00453	FALSE	FALSE	TRUE	-2.03
WBGene00015785	C15B12.3	29.0621	1.65192	0.325837	5.06976	3.98309e-07	4.19119e-06	chrX	6467284	6467562	-	NaN	NaN	FALSE	FALSE	FALSE	-0.91
WBGene00015796	C15F1.5	35.9077	1.14014	0.29398	3.87827	0.0001052	0.000604563	chrII	6967900	6970615	-	WBGene00032358	CBG11195	FALSE	FALSE	FALSE	-1.98
WBGene00007610	C15H7.3	6.56656	1.50337	0.401969	3.74001	0.000184016	0.000989816	chrIII	9650422	9651971	-	WBGene00031523	CBG10041	FALSE	FALSE	FALSE	-1.39
WBGene00007632	C16C10.13	22.9009	1.42896	0.345177	4.1398	3.47607e-05	0.000228902	chrIII	4176678	4177578	+	WBGene00039211	CBG20156	FALSE	TRUE	TRUE	-2.31
WBGene00219272	C17C3.24	25.6721	3.57757	0.387274	9.23781	2.51597e-20	1.57936e-18	chrII	5540984	5541822	-	NaN	NaN	FALSE	FALSE	FALSE	-1.7
WBGene00015890	C17C3.5	18.6435	3.03397	0.394246	7.69564	1.40789e-14	4.87082e-13	chrII	5551833	5552335	+	NaN	NaN	FALSE	TRUE	FALSE	-1.72
WBGene00015891	C17C3.6	34.5153	2.16056	0.335832	6.43345	1.24736e-10	2.43435e-09	chrII	5550046	5550530	+	NaN	NaN	FALSE	TRUE	FALSE	-1.72
WBGene00044374	C17F4.12	34.2864	3.28694	0.376645	8.7269	2.61738e-18	1.36996e-16	chrII	3243676	3244162	-	NaN	NaN	FALSE	FALSE	FALSE	2.2
WBGene00015918	C17G10.6	11.7363	1.68337	0.402448	4.18283	2.87899e-05	0.000193775	chrII	5599930	5603294	-	WBGene00025503	CBG02454	FALSE	FALSE	FALSE	-1.93
WBGene00015937	C17H12.12	18.0356	1.43536	0.365992	3.92183	8.78772e-05	0.000518158	chrIV	6795913	6798789	+	WBGene00027830	CBG05370	FALSE	FALSE	FALSE	-2.23
WBGene00015929	C17H12.3	12.8112	1.28944	0.391751	3.29147	0.000996661	0.00428175	chrIV	6793912	6795629	-	WBGene00027831	CBG05371	FALSE	TRUE	TRUE	-2.24
WBGene00015931	C17H12.5	18.4278	1.8972	0.374887	5.06073	4.17658e-07	4.37965e-06	chrIV	6815912	6817654	-	WBGene00033543	CBG12625	FALSE	FALSE	FALSE	-2.13
WBGene00007669	C18D1.2	20.0097	1.12805	0.372627	3.0273	0.00246749	0.0092668	chrII	10056988	10058993	+	WBGene00025704	CBG02699	FALSE	FALSE	FALSE	-1.53
WBGene00007682	C18D11.6	116.388	3.61545	0.30375	11.9027	1.14602e-32	1.59804e-30	chrIII	11810556	11811046	+	NaN	NaN	FALSE	TRUE	FALSE	-1.6
WBGene00007688	C18E9.8	13.103	1.73011	0.404153	4.28084	1.86193e-05	0.000131319	chrII	8985900	8988062	-	WBGene00026129	CBG03227	FALSE	FALSE	FALSE	-1.32
WBGene00015979	C18F10.9	4.64117	1.21243	0.395503	3.06554	0.00217276	0.00833119	chrIII	6271561	6272959	+	WBGene00037719	CBG18269	FALSE	FALSE	FALSE	-1.97
WBGene00015987	C18G1.9	19.151	3.09856	0.392091	7.90265	2.73043e-15	1.00965e-13	chrV	4767886	4769753	-	WBGene00030947	CBG09348	FALSE	FALSE	FALSE	-2.27
WBGene00015988	C18H2.1	61.2171	1.20594	0.242077	4.98163	6.30519e-07	6.30416e-06	chrIII	7662428	7672153	+	NaN	NaN	FALSE	FALSE	FALSE	-1.06
WBGene00015992	C18H2.5	27.692	3.2637	0.382631	8.52962	1.46833e-17	7.17167e-16	chrIII	7689356	7694398	-	WBGene00030826	CBG09195	FALSE	TRUE	FALSE	-1.21
WBGene00016000	C18H9.1	30.0022	3.10437	0.38102	8.14751	3.71489e-16	1.53877e-14	chrII	6699084	6700482	+	WBGene00032392	CBG11237	FALSE	FALSE	TRUE	-1.9
WBGene00016010	C23G10.1	22.2182	2.37455	0.38919	6.10127	1.05228e-09	1.77816e-08	chrIII	6209284	6212904	+	WBGene00042414	CBG24259	FALSE	FALSE	FALSE	-1.7
WBGene00016017	C23G10.11	9.42749	1.73682	0.405557	4.28254	1.8477e-05	0.000130467	chrIII	6215164	6215576	-	WBGene00042421	CBG24266	FALSE	FALSE	FALSE	-1.78
WBGene00016040	C24A11.1	33.4476	2.14153	0.320686	6.67797	2.42274e-11	5.35141e-10	chrI	5401757	5402896	+	WBGene00033418	CBG12472	FALSE	FALSE	FALSE	-2.21
WBGene00016041	C24A11.2	122.772	2.55148	0.229663	11.1097	1.12548e-28	1.22376e-26	chrI	5380160	5383029	+	NaN	NaN	FALSE	TRUE	FALSE	-2.22
WBGene00016042	C24A11.5	54.7452	2.735	0.304575	8.97973	2.71438e-19	1.56415e-17	chrI	5384639	5385737	-	NaN	NaN	FALSE	FALSE	FALSE	-2.22
WBGene00007717	C25D7.5	62.1239	1.29655	0.271366	4.77785	1.77182e-06	1.58735e-05	chrV	15053765	15056280	+	WBGene00032684	CBG11581	FALSE	FALSE	FALSE	-1.94
WBGene00045411	C25F9.11	351.823	1.56415	0.249256	6.27527	3.49035e-10	6.3441e-09	chrV	19432441	19433072	-	NaN	NaN	FALSE	FALSE	FALSE	-1.46
WBGene00045412	C25F9.12	66.222	1.65928	0.326115	5.08802	3.61813e-07	3.83366e-06	chrV	19402296	19402955	-	NaN	NaN	FALSE	FALSE	FALSE	-2.2
WBGene00194803	C25F9.16	11.6235	1.40908	0.399444	3.5276	0.000419351	0.00201511	chrV	19434387	19434753	+	NaN	NaN	FALSE	FALSE	FALSE	-1.62
WBGene00007723	C25F9.2	1797.06	3.93512	0.283105	13.8999	6.34571e-44	1.33238e-41	chrV	19421471	19426774	+	NaN	NaN	FALSE	FALSE	FALSE	-2.2
WBGene00044391	C25H3.15	24.1552	2.83003	0.396051	7.14561	8.95942e-13	2.46108e-11	chrII	5665408	5666278	+	WBGene00025519	CBG02471	FALSE	FALSE	FALSE	-1.7
WBGene00044392	C25H3.16	39.7949	3.01493	0.377553	7.98545	1.40008e-15	5.38428e-14	chrII	5666291	5666850	+	WBGene00025520	CBG02472	FALSE	FALSE	FALSE	-1.7
WBGene00007739	C26C6.4	29.7387	1.68525	0.334193	5.04275	4.58899e-07	4.76994e-06	chrI	7532315	7535997	+	WBGene00032924	CBG11885	FALSE	FALSE	FALSE	-1.89
WBGene00016137	C26E6.1	7.73406	1.27864	0.405353	3.15439	0.00160833	0.00644707	chrIII	4956891	4957539	+	NaN	NaN	FALSE	FALSE	FALSE	-1.41
WBGene00206373	C27A2.12	175.358	1.09972	0.189104	5.81542	6.04812e-09	8.96762e-08	chrII	5056211	5058113	-	WBGene00025384	Cbr-pho-12	FALSE	FALSE	FALSE	-1.52
WBGene00016153	C27A2.5	8.23472	1.4641	0.40496	3.61543	0.000299852	0.00150892	chrII	5068648	5069625	-	WBGene00025389	CBG02315	FALSE	FALSE	FALSE	-1.71
WBGene00007763	C27B7.6	11.865	1.58501	0.392631	4.03689	5.41644e-05	0.00033989	chrIV	8903222	8906205	-	WBGene00040419	CBG21717	FALSE	FALSE	FALSE	-2.18
WBGene00007773	C27C12.3	7.00005	1.47099	0.403549	3.64512	0.000267265	0.00136831	chrX	14863678	14865844	-	NaN	NaN	FALSE	FALSE	FALSE	-1.83
WBGene00007777	C27D8.1	31.7617	1.57972	0.333101	4.74246	2.11136e-06	1.85424e-05	chrIV	12717831	12719391	+	WBGene00025485	CBG02430	FALSE	TRUE	FALSE	-1.76
WBGene00007778	C27D8.2	297.473	1.39272	0.185094	7.52442	5.29562e-14	1.68235e-12	chrIV	12712765	12714771	+	WBGene00033158	CBG12166	FALSE	FALSE	FALSE	-1.96
WBGene00016165	C27F2.1	89.9473	1.04766	0.227142	4.61235	3.98151e-06	3.28353e-05	chrIII	4987209	4991450	+	WBGene00036444	CBG16532	FALSE	FALSE	FALSE	-1.45
WBGene00016168	C27F2.6	9.42705	1.44398	0.403642	3.57737	0.000347069	0.00171025	chrIII	4979796	4980418	-	WBGene00037669	CBG18207	FALSE	TRUE	FALSE	-1.13
WBGene00016181	C28C12.11	43.3374	1.00283	0.291935	3.43513	0.000592275	0.00272384	chrIV	8474056	8475278	+	WBGene00037902	CBG18491	FALSE	FALSE	FALSE	-1.8
WBGene00016185	C28F5.4	6.26873	1.6566	0.402369	4.11712	3.83639e-05	0.000249913	chrII	7519860	7523368	-	WBGene00030925	CBG09322	FALSE	FALSE	FALSE	-1.62
WBGene00016193	C28H8.2	35.4909	1.20455	0.369032	3.26409	0.00109817	0.00463825	chrIII	5923187	5924431	+	WBGene00030714	CBG09047	FALSE	FALSE	FALSE	-1.38
WBGene00016198	C28H8.7	9.95042	1.28422	0.401452	3.19893	0.0013794	0.00565726	chrIII	5885847	5886956	-	NaN	NaN	FALSE	FALSE	FALSE	-1.77
WBGene00007800	C29A12.6	149.158	2.2494	0.22651	9.93068	3.06173e-23	2.40037e-21	chrV	10847193	10852502	+	WBGene00031257	CBG09720	FALSE	FALSE	TRUE	-2.11
WBGene00016239	C30A5.4	11.5972	1.65619	0.397619	4.16526	3.10999e-05	0.000207716	chrIII	8222226	8223792	+	WBGene00030795	CBG09147	FALSE	TRUE	FALSE	-1.68
WBGene00016251	C30E1.2	29.831	2.9739	0.382028	7.78451	6.99851e-15	2.5018e-13	chrX	16926964	16928023	+	WBGene00036071	CBG15988	FALSE	TRUE	FALSE	-1.86
WBGene00016252	C30E1.3	21.4707	2.78235	0.399129	6.97106	3.1456e-12	7.93655e-11	chrX	16925954	16926821	+	WBGene00036071	CBG15988	FALSE	TRUE	FALSE	-1.84
WBGene00016253	C30E1.4	10.7392	2.01906	0.404581	4.99049	6.02248e-07	6.07469e-06	chrX	16923936	16925917	+	WBGene00036071	CBG15988	FALSE	FALSE	FALSE	-1.77
WBGene00016259	C30F8.3	18.3286	1.11503	0.36776	3.03194	0.00242985	0.00914611	chrI	5096601	5100579	+	WBGene00032080	CBG10809	FALSE	FALSE	FALSE	-2.21
WBGene00044177	C30G7.3	5.19773	1.50708	0.392916	3.83563	0.000125244	0.000704474	chrV	14942137	14945704	-	WBGene00041984	CBG23700	FALSE	FALSE	FALSE	-2.29
WBGene00016286	C31H1.1	13.0926	1.91598	0.405273	4.72762	2.27165e-06	1.98451e-05	chrIV	5797453	5800233	+	WBGene00030857	CBG09230	FALSE	FALSE	FALSE	-1.98
WBGene00206484	C31H2.14	35.9662	1.24109	0.369442	3.35936	0.000781245	0.00346468	chrX	5148175	5148891	+	NaN	NaN	FALSE	FALSE	FALSE	-1.86
WBGene00016312	C32D5.4	29.1312	3.40205	0.369723	9.20161	3.52638e-20	2.16162e-18	chrII	6321340	6323079	-	WBGene00025645	CBG02626	FALSE	FALSE	FALSE	-1.88
WBGene00016327	C32E12.1	38.3527	1.21624	0.293812	4.13952	3.4804e-05	0.000229105	chrI	5232576	5235222	+	WBGene00033726	CBG12848	FALSE	FALSE	FALSE	-2.09
WBGene00016322	C32E8.4	8.36277	1.27615	0.40532	3.1485	0.00164113	0.00655339	chrI	3783835	3784435	+	NaN	NaN	FALSE	FALSE	FALSE	-2.06
WBGene00007928	C34C12.9	84.3263	1.30092	0.272594	4.77238	1.82058e-06	1.62385e-05	chrIII	3474019	3475450	-	WBGene00031311	CBG09791	FALSE	FALSE	TRUE	-1.35
WBGene00016413	C34F11.1	14.765	1.95041	0.400281	4.87261	1.10134e-06	1.04024e-05	chrII	5212932	5213932	+	NaN	NaN	FALSE	FALSE	FALSE	-0.92
WBGene00016414	C34F11.2	8.07471	1.7408	0.40277	4.32207	1.54573e-05	0.000111307	chrII	5212270	5212789	+	NaN	NaN	FALSE	TRUE	FALSE	-0.92
WBGene00016416	C34F11.5	34.2553	1.5987	0.312599	5.11423	3.15027e-07	3.37909e-06	chrII	5195804	5199257	+	WBGene00025417	CBG02348	FALSE	FALSE	FALSE	-1.28
WBGene00007948	C35A5.4	14.0037	2.14158	0.399429	5.3616	8.24877e-08	9.90666e-07	chrV	10497059	10499324	+	WBGene00035477	CBG15149	FALSE	FALSE	FALSE	-2.41
WBGene00016441	C35D10.3	21.2831	3.02109	0.385744	7.83184	4.80791e-15	1.75302e-13	chrIII	4868921	4870106	+	WBGene00303410	CBG31449	FALSE	FALSE	FALSE	-1.5
WBGene00016457	C35E7.5	31.7176	1.28327	0.321124	3.99618	6.43739e-05	0.000395932	chrI	10823363	10828454	+	WBGene00030255	CBG08472	FALSE	FALSE	FALSE	-2.27
WBGene00044120	C36B1.13	29.1382	1.14505	0.333619	3.43222	0.000598666	0.00275115	chrI	8730905	8732125	-	WBGene00086683	CBG25269	FALSE	FALSE	FALSE	-2.21
WBGene00045308	C37H5.14	227.395	2.61143	0.255263	10.2303	1.45022e-24	1.2555e-22	chrV	4832011	4834377	-	WBGene00271221	CBG30491	FALSE	FALSE	TRUE	-1.93
WBGene00007998	C38C6.5	5.08824	1.38943	0.394963	3.51788	0.000435011	0.00207857	chrII	14630553	14632636	-	WBGene00038753	CBG19557	FALSE	TRUE	FALSE	-1.66
WBGene00016520	C39B5.2	76.8419	1.06185	0.242501	4.37873	1.19373e-05	8.8283e-05	chrIII	2233888	2236987	+	NaN	NaN	TRUE	FALSE	FALSE	-1.9
WBGene00016541	C39H7.1	9.06063	1.5424	0.405602	3.80274	0.000143105	0.000791909	chrIV	5631895	5633379	+	NaN	NaN	FALSE	FALSE	FALSE	-2.16
WBGene00077525	C41G7.8	47.9648	1.07958	0.279401	3.8639	0.000111592	0.00063653	chrI	9530816	9532831	-	WBGene00271753	CBG31060	FALSE	FALSE	FALSE	-2.34
WBGene00016581	C42C1.3	14.2777	1.4777	0.398398	3.70911	0.000207992	0.00110191	chrIV	12269594	12270492	-	WBGene00028567	CBG06264	FALSE	FALSE	FALSE	-1.41
WBGene00016596	C42D4.3	279.413	1.27478	0.189654	6.72159	1.7975e-11	4.05369e-10	chrIV	7179239	7180484	+	WBGene00028181	CBG05797	FALSE	FALSE	FALSE	-2.1
WBGene00016637	C44B12.3	81.2533	3.88578	0.334403	11.62	3.2602e-31	4.19395e-29	chrIV	1104773	1105086	+	NaN	NaN	FALSE	TRUE	FALSE	-1.79
WBGene00044462	C44B12.9	26.412	2.47563	0.385171	6.42736	1.29837e-10	2.52312e-09	chrIV	1103541	1104609	-	NaN	NaN	FALSE	FALSE	FALSE	-1.86
WBGene00206479	C44C11.6	18.4474	2.38455	0.397239	6.00281	1.93935e-09	3.14899e-08	chrII	12344834	12345286	+	WBGene00270439	CBG30115	FALSE	FALSE	FALSE	-0.28
WBGene00016700	C46A5.4	16.5958	1.65806	0.374298	4.42977	9.43318e-06	7.15598e-05	chrIV	7748157	7757358	-	WBGene00037226	CBG17660	FALSE	FALSE	TRUE	-2.3
WBGene00008122	C47A4.1	8.5357	1.6283	0.404747	4.02299	5.74634e-05	0.000358866	chrIV	13715906	13716379	-	WBGene00028405	Cbr-dnj-2	FALSE	FALSE	FALSE	-1.13
WBGene00044180	C47E8.11	298.71	4.77175	0.260088	18.3467	3.50834e-75	1.49039e-72	chrV	14688616	14688959	+	NaN	NaN	FALSE	TRUE	FALSE	-1.72
WBGene00008143	C47E8.4	1945.46	1.31213	0.170715	7.68608	1.51717e-14	5.19964e-13	chrV	14683706	14685528	-	WBGene00027206	CBG04561	FALSE	FALSE	TRUE	-1.7
WBGene00008178	C48D1.5	62.4289	1.55392	0.26024	5.97113	2.35615e-09	3.77211e-08	chrIV	13221961	13232974	+	WBGene00024995	CBG01809	FALSE	FALSE	FALSE	-2.15
WBGene00194643	C48D1.9	5.65662	1.3859	0.399866	3.46591	0.000528432	0.00246435	chrIV	13207468	13209666	-	NaN	NaN	FALSE	FALSE	FALSE	-1.93
WBGene00016765	C49C8.1	27.8909	3.25695	0.368644	8.83495	1.00146e-18	5.51013e-17	chrIV	8654604	8656829	+	WBGene00025822	CBG02852	FALSE	FALSE	TRUE	-2.05
WBGene00016767	C49C8.3	20.8724	1.37342	0.352858	3.89228	9.93063e-05	0.000577165	chrIV	8644732	8645345	+	NaN	NaN	FALSE	FALSE	FALSE	-1.92
WBGene00016788	C49G7.10	298.323	2.11249	0.375924	5.61945	1.91564e-08	2.58633e-07	chrV	4040409	4042004	-	WBGene00024645	CBG01398	FALSE	FALSE	TRUE	-1.92
WBGene00077593	C49G7.12	41.5958	1.5714	0.308796	5.08878	3.60376e-07	3.82287e-06	chrV	4038821	4039934	+	WBGene00024645	CBG01398	FALSE	FALSE	FALSE	-1.32
WBGene00269425	C49G7.13	11.3072	1.49603	0.400107	3.73906	0.00018471	0.000993257	chrV	4036111	4038054	+	WBGene00028637	CBG06342	FALSE	FALSE	FALSE	-1.55
WBGene00016785	C49G7.7	11.9507	1.33538	0.405097	3.29645	0.000979157	0.00421448	chrV	4034476	4035957	+	WBGene00024645	CBG01398	FALSE	FALSE	FALSE	-1.69
WBGene00220258	C50C3.19	9.56318	1.47587	0.403488	3.65777	0.000254422	0.00131584	chrIII	8190805	8191275	+	NaN	NaN	FALSE	FALSE	FALSE	-1.97
WBGene00016800	C50C3.2	145.472	4.00216	0.238178	16.8032	2.31048e-63	7.53669e-61	chrIII	8181881	8189372	+	WBGene00036548	CBG16668	FALSE	FALSE	FALSE	-1.69
WBGene00016835	C50F2.1	6.49383	1.30056	0.405457	3.20764	0.00133829	0.00551593	chrI	3892332	3895271	+	WBGene00042481	CBG24348	FALSE	FALSE	FALSE	-2.13
WBGene00008235	C50F4.10	28.3267	3.10932	0.385141	8.07319	6.8483e-16	2.71952e-14	chrV	9529951	9531577	-	WBGene00038654	CBG19430	FALSE	TRUE	FALSE	-2.31
WBGene00008236	C50F4.12	398.441	1.08755	0.133884	8.1231	4.54413e-16	1.84872e-14	chrV	9537672	9539738	-	WBGene00038546	CBG19300	FALSE	TRUE	FALSE	-2.19
WBGene00001910	C50F4.6	819.946	2.57582	0.20985	12.2746	1.24069e-34	1.90451e-32	chrV	9546092	9546838	+	WBGene00038551	CBG19305	FALSE	FALSE	FALSE	-2.1
WBGene00016847	C50F7.9	13.2792	1.26196	0.394706	3.19721	0.00138762	0.00568078	chrIV	7730669	7732060	-	WBGene00027134	CBG04469	FALSE	FALSE	FALSE	-2.14
WBGene00008259	C52E4.7	11.6878	1.55394	0.397962	3.90474	9.43252e-05	0.000551725	chrV	11994295	11995858	+	WBGene00041719	CBG23349	FALSE	FALSE	FALSE	-2.17
WBGene00016891	C53A3.1	3.86634	1.1129	0.3702	3.0062	0.00264532	0.00985266	chrV	5758792	5760232	-	WBGene00039289	CBG20260	FALSE	FALSE	FALSE	-1.42
WBGene00008269	C53A5.11	46.5704	2.02286	0.289011	6.99925	2.57339e-12	6.57457e-11	chrV	14562889	14564639	+	WBGene00042043	CBG23781	FALSE	FALSE	TRUE	-2.14
WBGene00008263	C53A5.2	22.7348	1.61761	0.349465	4.6288	3.67786e-06	3.06773e-05	chrV	14522810	14523177	-	WBGene00303107	CBG31183	FALSE	FALSE	FALSE	-2.58
WBGene00008267	C53A5.9	47.5428	3.88126	0.347628	11.165	6.0508e-29	6.65843e-27	chrV	14557038	14558866	-	NaN	NaN	FALSE	FALSE	FALSE	-2.14
WBGene00016893	C53B7.2	4.33147	1.17082	0.374204	3.12882	0.0017551	0.00693611	chrX	6846233	6847547	+	WBGene00032155	CBG10908	FALSE	FALSE	FALSE	-1.62
WBGene00044166	C54C6.7	37.2393	1.48965	0.300255	4.96127	7.0033e-07	6.90018e-06	chrIII	3545740	3546419	-	NaN	NaN	FALSE	FALSE	FALSE	-1.64
WBGene00016915	C54D2.1	26.4496	1.31913	0.339361	3.88709	0.000101454	0.000587406	chrX	7842632	7845438	+	WBGene00036664	CBG16832	FALSE	FALSE	FALSE	-1.72
WBGene00016923	C54F6.5	20.6256	1.3203	0.372064	3.54859	0.000387305	0.00188112	chrV	7529116	7529450	+	NaN	NaN	FALSE	FALSE	FALSE	-2.7
WBGene00008312	C54G4.2	5.40935	1.3777	0.39995	3.44469	0.000571714	0.00264125	chrI	8006650	8009118	+	WBGene00038077	CBG18701	FALSE	FALSE	FALSE	-2.24
WBGene00236808	C54G6.8	20.9407	2.87323	0.385093	7.46113	8.57858e-14	2.67415e-12	chrI	1015204	1015731	-	WBGene00270836	CBG29809	FALSE	FALSE	FALSE	-1.74
WBGene00016946	C55B7.10	10.6132	1.90517	0.404201	4.71341	2.43605e-06	2.117e-05	chrI	6502167	6503920	-	WBGene00033757	CBG12889	FALSE	FALSE	FALSE	-2.17
WBGene00016942	C55B7.3	684.898	1.69364	0.193992	8.73047	2.53628e-18	1.33516e-16	chrI	6499537	6501410	+	WBGene00037689	CBG18235	FALSE	FALSE	FALSE	-2.11
WBGene00016962	C56C10.4	20.3438	1.56507	0.356827	4.38607	1.15416e-05	8.55644e-05	chrII	6583039	6584514	+	WBGene00027023	CBG04322	FALSE	FALSE	FALSE	-1.96
WBGene00016963	C56C10.6	14.3151	2.0201	0.402961	5.01314	5.35479e-07	5.47375e-06	chrII	6579702	6581336	-	WBGene00270475	CBG30151	FALSE	FALSE	FALSE	-1.99
WBGene00016980	C56G2.5	18.9774	1.72857	0.401702	4.30312	1.6841e-05	0.000120217	chrIII	6321176	6324239	-	WBGene00038872	CBG19698	FALSE	FALSE	FALSE	-1.43
WBGene00009585	cal-7	131.354	4.59129	0.345143	13.3026	2.2364e-40	4.08523e-38	chrV	9734103	9735316	+	WBGene00038597	Cbr-cal-7	FALSE	FALSE	FALSE	-2.29
WBGene00015338	catp-2	7.64484	1.33025	0.4043	3.29026	0.00100096	0.00429617	chrV	4934706	4939085	+	WBGene00038829	Cbr-catp-2	FALSE	FALSE	FALSE	-2.12
WBGene00015660	catp-3	601.33	1.45404	0.174727	8.32178	8.66549e-17	3.8514e-15	chrV	8076012	8079914	+	WBGene00032496	Cbr-catp-3	FALSE	FALSE	FALSE	-2.2
WBGene00007248	catp-4	26.7346	3.01272	0.380661	7.91444	2.48368e-15	9.278e-14	chrII	14593581	14597657	+	WBGene00024860	Cbr-catp-4	TRUE	FALSE	FALSE	-1.66
WBGene00018783	cbs-2	16.423	2.78874	0.394198	7.07447	1.50017e-12	3.96006e-11	chrII	2220464	2223567	-	NaN	NaN	FALSE	FALSE	FALSE	-0.99
WBGene00021643	ccep-290	181.924	1.02084	0.156128	6.53847	6.21533e-11	1.27139e-09	chrI	3487812	3499706	-	WBGene00035316	Cbr-ccep-290	FALSE	TRUE	FALSE	-1.8
WBGene00000388	cdc-25.3	9.08402	1.63443	0.405601	4.02966	5.58584e-05	0.00034944	chrIII	8916351	8917929	-	WBGene00030028	Cbr-cdc-25.3	FALSE	TRUE	FALSE	-1.41
WBGene00000391	cdd-1	1748.98	1.40693	0.107156	13.1297	2.22441e-39	3.90705e-37	chrX	8208748	8211149	-	WBGene00041210	Cbr-cdd-1	FALSE	TRUE	FALSE	-1.06
WBGene00016997	cebp-1	805.447	1.10544	0.323996	3.41191	0.000645101	0.00292844	chrX	1452695	1454000	-	WBGene00033503	Cbr-cebp-1	FALSE	FALSE	FALSE	-1.26
WBGene00017538	ceh-49	35.3994	3.02439	0.342501	8.83032	1.04379e-18	5.70867e-17	chrV	6118332	6120206	-	WBGene00035393	CBG15045	FALSE	FALSE	FALSE	-2.41
WBGene00016557	ceh-84	9.93197	2.28014	0.405603	5.6216	1.89197e-08	2.56171e-07	chrII	1999743	2000820	-	NaN	NaN	TRUE	FALSE	FALSE	-1.67
WBGene00000469	ces-2	42.7186	2.82268	0.349404	8.07857	6.55319e-16	2.608e-14	chrI	14961501	14965361	+	WBGene00038970	Cbr-ces-2	FALSE	FALSE	FALSE	-1.95
WBGene00000483	che-1	10.0567	1.24106	0.401806	3.08871	0.00201026	0.00779648	chrI	6517575	6520879	-	WBGene00033589	Cbr-che-1	FALSE	FALSE	FALSE	-2.18
WBGene00000487	che-6	23.442	1.2034	0.334312	3.59963	0.000318664	0.00159219	chrIV	2104056	2111408	-	WBGene00041056	Cbr-che-6	TRUE	FALSE	FALSE	-1.71
WBGene00011848	chil-27	6.15585	1.51912	0.402833	3.7711	0.000162528	0.000888627	chrII	9477867	9479536	+	WBGene00025718	CBG02713	FALSE	FALSE	FALSE	-1.14
WBGene00000525	clc-4	31.5189	2.24423	0.360514	6.22508	4.81318e-10	8.56109e-09	chrX	10782996	10783907	-	WBGene00037177	Cbr-clc-4	FALSE	FALSE	FALSE	-1.56
WBGene00008853	clec-101	4.88608	1.22889	0.39482	3.11254	0.00185487	0.00727415	chrI	11560637	11564387	-	WBGene00035662	Cbr-clec-101	FALSE	TRUE	TRUE	-2.03
WBGene00012480	clec-104	26.7908	1.30787	0.326214	4.00922	6.09195e-05	0.000377046	chrI	12859499	12861197	+	NaN	NaN	FALSE	FALSE	FALSE	-1.6
WBGene00012482	clec-106	6.04976	1.21063	0.400975	3.01922	0.00253423	0.00948621	chrI	12866120	12866896	-	NaN	NaN	FALSE	FALSE	FALSE	-2.03
WBGene00012502	clec-107	6.2319	1.46229	0.401134	3.64539	0.000266991	0.00136762	chrI	13069529	13071190	-	WBGene00029817	CBG07930	FALSE	FALSE	TRUE	-1.31
WBGene00009822	clec-113	12.1263	1.93221	0.405069	4.77008	1.84153e-06	1.64014e-05	chrI	14054593	14056894	-	WBGene00038181	Cbr-clec-113	FALSE	FALSE	FALSE	-2.29
WBGene00021291	clec-121	11.1548	2.16811	0.40214	5.39143	6.99e-08	8.48978e-07	chrII	3102318	3104736	+	WBGene00037297	CBG17751	FALSE	FALSE	FALSE	-1.67
WBGene00021290	clec-122	11.614	2.27565	0.405204	5.61607	1.95345e-08	2.63348e-07	chrII	3106065	3108032	+	WBGene00037297	CBG17751	FALSE	FALSE	FALSE	-1.72
WBGene00021118	clec-125	21.2337	1.44942	0.356708	4.06332	4.83797e-05	0.000307927	chrII	3516008	3518898	+	WBGene00037301	Cbr-clec-125.1	FALSE	FALSE	FALSE	-1.99
WBGene00020220	clec-140	4.39368	1.25523	0.390398	3.21525	0.00130329	0.00539236	chrII	4674420	4675729	+	WBGene00270491	Cbr-clec-140.1	FALSE	FALSE	TRUE	-2
WBGene00012086	clec-144	10.2066	1.40057	0.404571	3.46187	0.000536433	0.00249848	chrII	11831062	11832575	-	NaN	NaN	FALSE	FALSE	FALSE	-0.69
WBGene00007399	clec-162	8.38536	1.33367	0.404151	3.29993	0.000967088	0.00417335	chrIII	9723282	9725214	-	WBGene00031501	Cbr-clec-162	FALSE	FALSE	FALSE	-1.86
WBGene00012661	clec-163	12.3229	1.39288	0.398952	3.49134	0.000480605	0.00226736	chrIII	10794349	10796369	+	WBGene00026024	CBG03092	FALSE	FALSE	FALSE	-1.58
WBGene00009520	clec-168	4.05855	1.15784	0.38468	3.00987	0.00261359	0.00975333	chrIV	1256956	1259344	+	NaN	NaN	FALSE	FALSE	FALSE	-1.95
WBGene00022312	clec-171	16.0431	2.48273	0.395449	6.27826	3.42388e-10	6.23569e-09	chrIV	1425482	1426887	-	NaN	NaN	FALSE	FALSE	FALSE	-1.17
WBGene00044511	clec-181	8.01873	1.58722	0.405603	3.91323	9.10693e-05	0.00053508	chrIV	8596067	8596943	+	WBGene00029846	Cbr-clec-99	FALSE	FALSE	TRUE	-2.13
WBGene00011855	clec-183	13.2598	2.55152	0.402356	6.34145	2.27618e-10	4.26015e-09	chrIV	9328010	9328745	+	NaN	NaN	FALSE	FALSE	FALSE	-2.09
WBGene00009156	clec-196	182.418	2.64803	0.193148	13.7098	8.86969e-43	1.82048e-40	chrIV	17276956	17277748	+	WBGene00023841	Cbr-clec-196	FALSE	FALSE	TRUE	0.57
WBGene00015198	clec-2	5.55552	1.20134	0.397463	3.02252	0.00250676	0.00938724	chrII	3020561	3023431	-	NaN	NaN	FALSE	FALSE	FALSE	-1.44
WBGene00021744	clec-203	88.484	4.27757	0.363943	11.7534	6.78303e-32	9.04421e-30	chrV	1088283	1089891	+	NaN	NaN	TRUE	FALSE	FALSE	-1.5
WBGene00017603	clec-212	4.16113	1.25807	0.380528	3.3061	0.000946027	0.0040931	chrV	7566232	7570390	-	NaN	NaN	FALSE	FALSE	FALSE	-2.61
WBGene00017824	clec-217	8.3219	1.87099	0.405605	4.61285	3.97187e-06	3.27707e-05	chrV	7957277	7958840	-	WBGene00030378	Cbr-clec-217	FALSE	FALSE	FALSE	-2.17
WBGene00008916	clec-221	56.256	1.29763	0.294053	4.41291	1.01992e-05	7.67332e-05	chrV	10953501	10954434	-	WBGene00041486	Cbr-clec-221	FALSE	FALSE	TRUE	-1.7
WBGene00013622	clec-238	11.5938	1.68477	0.403175	4.17877	2.93095e-05	0.00019691	chrV	16952127	16953507	+	NaN	NaN	FALSE	FALSE	FALSE	0.12
WBGene00044892	clec-257	8.99817	1.86026	0.405244	4.59046	4.42277e-06	3.61966e-05	chrV	18773061	18774024	+	NaN	NaN	FALSE	FALSE	FALSE	0.5
WBGene00016088	clec-266	17.2598	1.47416	0.369277	3.99201	6.55147e-05	0.000401773	chrX	6617393	6622915	-	WBGene00032116	Cbr-clec-266	FALSE	TRUE	TRUE	-2.15
WBGene00016451	clec-6	10.8409	1.26677	0.398665	3.17752	0.0014854	0.00602436	chrIII	4885697	4887442	-	WBGene00031720	Cbr-clec-17	FALSE	FALSE	FALSE	-1.55
WBGene00013931	clec-97	4.69185	1.27228	0.390068	3.2617	0.00110748	0.00467352	chrI	11152704	11154329	+	NaN	NaN	FALSE	FALSE	FALSE	-1.63
WBGene00013932	clec-98	4.33268	1.32509	0.384534	3.44595	0.000569054	0.00263029	chrI	11154213	11155369	-	WBGene00029846	Cbr-clec-99	FALSE	TRUE	FALSE	-1.61
WBGene00013933	clec-99	11.0104	2.21777	0.403903	5.49084	4.00026e-08	5.10284e-07	chrI	11156745	11158831	-	WBGene00270344	CBG29916	FALSE	FALSE	FALSE	-1.76
WBGene00021041	clp-10	30.8259	1.95301	0.359503	5.43253	5.55596e-08	6.88539e-07	chrIII	35454	39462	-	WBGene00038627	Cbr-clp-9	TRUE	FALSE	FALSE	-0.66
WBGene00000546	clp-6	19.1141	1.68073	0.363119	4.6286	3.68143e-06	3.06932e-05	chrIV	1431272	1435039	-	WBGene00034602	Cbr-clp-7	TRUE	FALSE	FALSE	-1.06
WBGene00009695	clp-8	11.1215	2.14377	0.404721	5.29689	1.17789e-07	1.37135e-06	chrI	13254141	13257729	+	NaN	NaN	FALSE	TRUE	FALSE	-1.74
WBGene00000549	cls-2	6275.04	1.44937	0.148055	9.78943	1.25005e-22	9.28235e-21	chrIII	9055052	9058882	+	WBGene00087299	CBG25885	FALSE	TRUE	FALSE	-1.96
WBGene00000551	clx-1	11.4027	2.00791	0.402981	4.98264	6.27238e-07	6.27479e-06	chrIV	7734647	7736409	+	NaN	NaN	FALSE	FALSE	FALSE	-2.14
WBGene00044900	cnc-11	8.02966	1.53164	0.405351	3.77856	0.000157741	0.00086582	chrV	1442588	1442876	+	NaN	NaN	FALSE	FALSE	FALSE	-1.88
WBGene00000556	cnc-2	50.4676	1.05411	0.281537	3.74411	0.000181037	0.000976668	chrV	1449665	1450189	-	NaN	NaN	FALSE	FALSE	FALSE	-1.69
WBGene00000558	cnc-4	90.5819	1.28777	0.285416	4.51192	6.42437e-06	5.05183e-05	chrV	1447195	1447707	+	NaN	NaN	FALSE	FALSE	FALSE	-1.57
WBGene00011260	cnnm-5	16.2454	2.49361	0.388957	6.41101	1.44557e-10	2.77961e-09	chrIII	3826378	3829205	-	WBGene00030064	Cbr-cnnm-5	FALSE	FALSE	TRUE	-1.92
WBGene00020725	cnp-3	1738.49	2.01993	0.306171	6.5974	4.18421e-11	8.87722e-10	chrX	17135975	17138110	-	WBGene00036054	Cbr-cnp-3	FALSE	TRUE	FALSE	-1.76
WBGene00000678	col-104	252.701	1.57871	0.250467	6.30308	2.9178e-10	5.37292e-09	chrIV	1353636	1355305	-	WBGene00035585	Cbr-col-104	FALSE	FALSE	FALSE	-1.38
WBGene00000684	col-110	35.3601	1.41469	0.341392	4.1439	3.41452e-05	0.000225418	chrIV	4608201	4609679	-	WBGene00024907	Cbr-col-110	FALSE	FALSE	FALSE	-2.28
WBGene00000688	col-114	9.07125	1.61084	0.403517	3.99199	6.55215e-05	0.000401773	chrIV	7245505	7246640	-	WBGene00028198	Cbr-col-114	FALSE	FALSE	FALSE	-2.08
WBGene00000601	col-12	4877	1.2005	0.334244	3.59168	0.000328555	0.00163268	chrV	10423907	10425092	-	WBGene00031172	CBG09612	FALSE	FALSE	FALSE	-2.48
WBGene00000704	col-130	544.449	1.24912	0.183244	6.81671	9.31487e-12	2.20694e-10	chrIV	12427506	12428522	-	WBGene00026213	Cbr-col-130	FALSE	FALSE	FALSE	-2.57
WBGene00000706	col-132	7.4184	1.40655	0.405562	3.46817	0.000524024	0.00244692	chrIV	13089578	13091067	-	WBGene00025015	Cbr-col-132	FALSE	FALSE	FALSE	-2.1
WBGene00000707	col-133	107.955	1.17024	0.239849	4.87908	1.06579e-06	1.01084e-05	chrIV	14098325	14099368	-	NaN	NaN	FALSE	FALSE	FALSE	-1.6
WBGene00000711	col-138	112.996	1.3013	0.194731	6.68254	2.3484e-11	5.19349e-10	chrIV	17182798	17183740	-	WBGene00023757	Cbr-col-138	FALSE	FALSE	FALSE	-1.95
WBGene00000603	col-14	311.79	1.37566	0.222778	6.17502	6.61566e-10	1.15977e-08	chrIV	7753408	7754651	+	WBGene00037227	Cbr-col-14	FALSE	FALSE	FALSE	-2.29
WBGene00000718	col-145	744.736	1.05325	0.166936	6.30928	2.80337e-10	5.17787e-09	chrV	9162051	9163005	-	WBGene00038475	Cbr-col-145	FALSE	FALSE	FALSE	-2.09
WBGene00000719	col-146	2950.4	1.37874	0.320216	4.30564	1.665e-05	0.00011904	chrV	9629943	9631012	+	WBGene00038571	Cbr-col-147	FALSE	FALSE	TRUE	-2.12
WBGene00000725	col-152	54.8924	3.56115	0.316152	11.2641	1.97462e-29	2.2544e-27	chrV	10560921	10562150	+	WBGene00031198	Cbr-col-152	FALSE	TRUE	FALSE	-2.11
WBGene00000732	col-159	15807.1	1.00763	0.167206	6.02627	1.67785e-09	2.75376e-08	chrV	13198230	13199315	-	NaN	NaN	FALSE	FALSE	FALSE	-1.86
WBGene00000734	col-161	1280.46	1.25947	0.332651	3.78615	0.000152997	0.000842061	chrV	13317028	13318011	-	WBGene00028944	CBG06704	FALSE	TRUE	FALSE	-1.98
WBGene00000735	col-162	140.88	1.1663	0.258564	4.51068	6.46206e-06	5.07273e-05	chrV	13441967	13443402	+	WBGene00028944	CBG06704	TRUE	FALSE	FALSE	-2.3
WBGene00000737	col-164	42.3891	3.37697	0.341283	9.89491	4.38026e-23	3.34787e-21	chrX	2093475	2094842	+	WBGene00034709	Cbr-col-164	FALSE	FALSE	FALSE	-1.93
WBGene00000748	col-175	13.203	1.58829	0.387308	4.10084	4.11654e-05	0.000266089	chrX	9233638	9234618	-	WBGene00036210	Cbr-col-175	FALSE	FALSE	FALSE	-1.75
WBGene00000612	col-35	13.4218	1.49756	0.385045	3.88931	0.000100528	0.000583561	chrI	7385907	7386935	-	WBGene00032951	Cbr-col-35	FALSE	FALSE	FALSE	-2.04
WBGene00000613	col-36	66.6639	3.41874	0.337852	10.119	4.54872e-24	3.88278e-22	chrII	7167513	7168662	-	WBGene00033907	Cbr-col-36	FALSE	FALSE	FALSE	-1.53
WBGene00000614	col-37	5.46468	1.31939	0.402557	3.27753	0.00104718	0.00445584	chrV	12166706	12167753	-	WBGene00041761	Cbr-col-37	FALSE	TRUE	FALSE	-2.21
WBGene00000616	col-39	27674.1	1.33337	0.268431	4.96727	6.7901e-07	6.71547e-06	chrII	10704902	10706019	+	WBGene00025973	Cbr-col-39	FALSE	FALSE	FALSE	-1.17
WBGene00000627	col-50	6.52738	1.67317	0.402259	4.15945	3.19021e-05	0.000212143	chrI	3651230	3652599	-	WBGene00033002	Cbr-col-50	FALSE	FALSE	FALSE	-2.32
WBGene00000628	col-51	21.7155	2.50131	0.388959	6.43078	1.26952e-10	2.47232e-09	chrI	3653997	3655265	+	WBGene00033001	Cbr-col-51	FALSE	FALSE	FALSE	-2.25
WBGene00000629	col-52	27.0087	1.79164	0.354859	5.04889	4.44385e-07	4.62804e-06	chrI	4571214	4572787	-	WBGene00040879	Cbr-col-52	TRUE	FALSE	FALSE	-2.26
WBGene00000638	col-62	31.811	1.39506	0.34995	3.98645	6.70695e-05	0.000409752	chrI	7403291	7404374	-	WBGene00032962	CBG11934	FALSE	FALSE	FALSE	-2.15
WBGene00000639	col-63	16.3872	2.00872	0.381953	5.25909	1.4477e-07	1.65945e-06	chrI	8243695	8244963	-	WBGene00042569	Cbr-col-63	FALSE	FALSE	FALSE	-2.22
WBGene00000640	col-64	26.279	1.47948	0.337225	4.38723	1.14806e-05	8.51464e-05	chrI	9893698	9895596	-	WBGene00026626	Cbr-col-64	FALSE	FALSE	FALSE	-1.73
WBGene00000645	col-69	51.8307	1.07637	0.292255	3.683	0.000230508	0.00120685	chrII	303924	305530	-	WBGene00029220	Cbr-col-69	FALSE	FALSE	FALSE	-1.03
WBGene00000655	col-79	33.9987	1.29139	0.314767	4.10269	4.08374e-05	0.00026425	chrII	10703596	10704572	+	WBGene00025974	Cbr-col-79	FALSE	TRUE	FALSE	-1.16
WBGene00000597	col-8	24.7748	1.46006	0.340728	4.2851	1.82655e-05	0.000129224	chrIII	7019583	7020600	-	WBGene00036416	Cbr-col-8	FALSE	FALSE	FALSE	-1.68
WBGene00000657	col-81	25.6658	1.46105	0.363736	4.01678	5.89986e-05	0.000367073	chrII	11012397	11013820	-	WBGene00025941	Cbr-col-81	FALSE	FALSE	FALSE	-1.86
WBGene00000658	col-83	10.2573	1.29944	0.397481	3.26919	0.00107855	0.00456697	chrII	11044135	11045968	-	WBGene00025934	Cbr-col-83	FALSE	FALSE	FALSE	-1.78
WBGene00000659	col-84	61.2573	1.27736	0.297052	4.30011	1.70713e-05	0.000121718	chrII	11868535	11869688	+	WBGene00025742	Cbr-col-84	FALSE	FALSE	TRUE	-1.07
WBGene00000660	col-85	13.949	1.21874	0.40517	3.00796	0.00263005	0.0098027	chrII	12493800	12495106	-	WBGene00031690	Cbr-col-85	FALSE	FALSE	FALSE	-2.34
WBGene00000662	col-87	28.7135	1.86188	0.340243	5.4722	4.44475e-08	5.60719e-07	chrII	14090075	14094690	-	WBGene00039751	Cbr-col-87	FALSE	FALSE	FALSE	-1.34
WBGene00000663	col-88	48.8353	2.73106	0.298747	9.14173	6.14635e-20	3.66913e-18	chrIII	41061	42021	+	WBGene00035545	Cbr-col-88	TRUE	FALSE	FALSE	-0.64
WBGene00000670	col-95	29.5649	3.40966	0.369961	9.21626	3.07652e-20	1.91144e-18	chrIII	11703885	11705091	+	WBGene00034031	Cbr-col-95	FALSE	FALSE	FALSE	-1.6
WBGene00000671	col-96	41.4244	1.60778	0.343181	4.68492	2.80067e-06	2.40525e-05	chrIII	11705713	11706644	-	WBGene00034030	Cbr-col-96	FALSE	FALSE	FALSE	-1.46
WBGene00000672	col-97	481.121	2.72621	0.211424	12.8945	4.83444e-38	8.17691e-36	chrIII	12992405	12993707	-	WBGene00035925	Cbr-col-97	TRUE	TRUE	TRUE	-2.23
WBGene00011063	cpg-3	53.1995	1.35228	0.280897	4.81414	1.47838e-06	1.35231e-05	chrI	7244937	7246295	+	WBGene00040589	Cbr-cpg-3	FALSE	FALSE	FALSE	-2.25
WBGene00000780	cpn-4	2055.79	1.10797	0.129862	8.53189	1.43979e-17	7.05113e-16	chrI	10924240	10925753	-	WBGene00039390	Cbr-cpn-4	FALSE	TRUE	TRUE	-2.04
WBGene00021703	cpt-3	13.1919	1.49839	0.390194	3.84012	0.000122973	0.000692892	chrIII	2082819	2088248	+	WBGene00032570	Cbr-cpt-5	FALSE	FALSE	FALSE	-2.16
WBGene00000819	csp-1	121.587	3.47586	0.310314	11.2011	4.02585e-29	4.51166e-27	chrII	13601204	13605057	+	NaN	NaN	FALSE	FALSE	FALSE	-0.91
WBGene00009541	cutl-17	58.2094	1.56711	0.316974	4.94398	7.65448e-07	7.48525e-06	chrIV	9449473	9457501	-	WBGene00040368	Cbr-cutl-17	FALSE	FALSE	FALSE	-2.08
WBGene00021343	cutl-23	172.129	1.20991	0.166116	7.28355	3.2515e-13	9.48804e-12	chrIII	5770185	5774703	+	WBGene00030758	Cbr-cutl-23.1	FALSE	FALSE	FALSE	-1.37
WBGene00000860	cwp-2	4.57353	1.22258	0.395543	3.0909	0.00199548	0.00774904	chrV	4841940	4842567	-	NaN	NaN	FALSE	FALSE	FALSE	-1.95
WBGene00000861	cwp-3	4.41889	1.19792	0.39462	3.03564	0.00240028	0.00905534	chrV	4842836	4843845	+	NaN	NaN	FALSE	FALSE	FALSE	-1.79
WBGene00008809	cyp-13A11	6.35604	1.23345	0.401608	3.07129	0.00213138	0.0081966	chrIII	13021009	13023949	+	WBGene00024322	CBG01029	FALSE	TRUE	FALSE	-2.14
WBGene00011674	cyp-13A8	16.8854	1.3621	0.372341	3.65821	0.000253986	0.00131395	chrII	9805627	9807532	-	WBGene00024321	Cbr-cyp-13A8	FALSE	FALSE	FALSE	-1.25
WBGene00000373	cyp-14A5	1035.29	1.01529	0.113611	8.93656	4.01462e-19	2.28458e-17	chrV	5421018	5423488	-	NaN	NaN	FALSE	FALSE	FALSE	-1.49
WBGene00016092	cyp-33B1	9.2128	1.25926	0.403629	3.11985	0.00180946	0.0071251	chrV	9041330	9043677	+	WBGene00038436	Cbr-cyp-33B1	FALSE	FALSE	FALSE	-2.12
WBGene00008381	D1081.3	6.50703	1.37496	0.398074	3.45404	0.000552262	0.0025611	chrI	8463356	8469309	-	WBGene00270374	CBG29946	FALSE	FALSE	FALSE	-1.99
WBGene00008389	D1086.2	34.5395	1.04497	0.324954	3.21575	0.00130102	0.00538541	chrV	14097038	14098668	-	WBGene00027343	CBG04725	FALSE	FALSE	FALSE	-2.21
WBGene00008396	D1086.9	27.7074	2.60461	0.395799	6.58062	4.68476e-11	9.85905e-10	chrV	14104270	14106416	+	WBGene00027373	CBG04759	FALSE	FALSE	FALSE	-2.29
WBGene00017050	D2024.1	8.26639	1.75306	0.404927	4.32932	1.49571e-05	0.000108164	chrIV	7247543	7249437	+	WBGene00033660	CBG12760	FALSE	FALSE	FALSE	-2.09
WBGene00008423	D2045.5	21.9261	1.27474	0.344566	3.69957	0.000215964	0.00113985	chrIII	10468107	10469503	-	NaN	NaN	FALSE	FALSE	FALSE	-0.29
WBGene00194711	D2062.13	4.53895	1.26102	0.389737	3.23556	0.00121403	0.00505499	chrII	2612612	2614060	+	NaN	NaN	FALSE	FALSE	FALSE	-1.94
WBGene00017060	D2063.1	167.858	1.44911	0.19538	7.4169	1.19897e-13	3.67476e-12	chrV	4327121	4328736	+	NaN	NaN	FALSE	FALSE	FALSE	-2.35
WBGene00017488	dct-7	12.1563	1.44369	0.394327	3.66115	0.00025109	0.00130081	chrIV	4290189	4290703	-	NaN	NaN	FALSE	FALSE	FALSE	-1.83
WBGene00044472	dct-8	21.1688	2.54087	0.39171	6.48661	8.77903e-11	1.74882e-09	chrIV	3895070	3895506	+	NaN	NaN	FALSE	FALSE	FALSE	-2.12
WBGene00021006	dct-9	5.99058	1.65513	0.39782	4.1605	3.17557e-05	0.000211323	chrI	2233744	2234957	-	WBGene00271435	CBG30870	FALSE	FALSE	FALSE	-1.82
WBGene00016063	delm-2	20.4506	1.5038	0.351938	4.27292	1.92927e-05	0.000135338	chrI	4109407	4112385	+	WBGene00033075	Cbr-acd-1	FALSE	FALSE	FALSE	-2.02
WBGene00012272	dhc-4	349.112	1.81534	0.174372	10.4107	2.21521e-25	2.05407e-23	chrIII	10969944	10991912	+	WBGene00037708	Cbr-dhc-4	FALSE	FALSE	FALSE	-1.53
WBGene00020066	dhhc-5	49.7489	2.38804	0.296874	8.04395	8.69878e-16	3.41722e-14	chrIII	6847390	6849055	-	WBGene00037495	Cbr-dhhc-5	FALSE	FALSE	FALSE	-1.34
WBGene00016789	djr-1.2	23.6597	1.68321	0.354194	4.75223	2.0119e-06	1.77886e-05	chrV	4054191	4055109	-	WBGene00029190	Cbr-djr-1.2	FALSE	FALSE	FALSE	-2.42
WBGene00007058	dmd-6	1082.3	1.02255	0.163788	6.24316	4.28808e-10	7.67193e-09	chrIV	14616603	14623961	+	WBGene00040287	Cbr-dmd-6	FALSE	FALSE	FALSE	-2.11
WBGene00001031	dnj-13	16947.1	1.59773	0.131584	12.1422	6.30742e-34	9.36729e-32	chrII	11545563	11547366	+	WBGene00025832	Cbr-dnj-13	FALSE	TRUE	TRUE	-1.85
WBGene00019640	dos-2	37.1598	3.38865	0.352904	9.6022	7.82561e-22	5.47703e-20	chrII	3976246	3977969	+	WBGene00037862	Cbr-dos-2	FALSE	FALSE	FALSE	-1.73
WBGene00019331	dos-3	66.8102	2.72817	0.308494	8.84351	9.27561e-19	5.13447e-17	chrIII	835815	839591	-	WBGene00042639	Cbr-dos-3	FALSE	FALSE	FALSE	-1.61
WBGene00001075	dpy-14	64.6636	3.62498	0.323907	11.1914	4.4926e-29	4.97372e-27	chrI	6843589	6845134	+	WBGene00033655	Cbr-dpy-14	FALSE	FALSE	FALSE	-2.12
WBGene00001076	dpy-17	820.533	4.26718	0.157474	27.0977	1.04764e-161	1.36695e-158	chrIII	5107330	5108497	+	WBGene00026396	Cbr-dpy-17	FALSE	FALSE	FALSE	-0.74
WBGene00009584	drap-1	4376.94	1.71516	0.0950575	18.0434	8.89388e-73	3.69237e-70	chrV	9730110	9734022	+	WBGene00038596	Cbr-drap-1	FALSE	FALSE	FALSE	-2.18
WBGene00018643	drd-50	133.593	1.85618	0.242795	7.64506	2.08855e-14	6.98747e-13	chrIV	4117732	4119179	+	WBGene00042151	CBG23914	FALSE	FALSE	FALSE	-1.93
WBGene00194892	dsb-2	205.821	2.27674	0.162943	13.9726	2.28983e-44	4.86375e-42	chrII	14411095	14412218	+	WBGene00032248	Cbr-dsb-2	FALSE	FALSE	FALSE	-1.69
WBGene00008447	E01G4.5	248.487	1.69837	0.382552	4.43958	9.01329e-06	6.88031e-05	chrII	13472401	13473995	+	NaN	NaN	FALSE	TRUE	FALSE	-1.09
WBGene00008448	E01G4.6	89.2161	1.51699	0.223546	6.78604	1.15257e-11	2.68204e-10	chrII	13482405	13485780	+	WBGene00039698	CBG20775	FALSE	FALSE	TRUE	-0.05
WBGene00008449	E01G6.1	108.543	1.21007	0.206825	5.85068	4.8956e-09	7.37854e-08	chrX	12260881	12266537	+	WBGene00036263	CBG16264	FALSE	FALSE	FALSE	-2.23
WBGene00008460	E02H4.2	31.7044	2.62534	0.349742	7.5065	6.07292e-14	1.91927e-12	chrX	14278459	14281599	-	NaN	NaN	FALSE	FALSE	FALSE	-2.11
WBGene00008663	eak-6	47.6572	1.41768	0.303921	4.66464	3.09163e-06	2.62918e-05	chrI	10023810	10025831	+	NaN	NaN	FALSE	FALSE	FALSE	-2.06
WBGene00001158	ech-9	178.092	1.08809	0.244252	4.45478	8.39801e-06	6.4484e-05	chrIV	10233321	10235329	-	WBGene00026258	Cbr-ech-9	FALSE	FALSE	TRUE	-1.84
WBGene00001164	efn-3	4.6853	1.33152	0.393655	3.38246	0.000718387	0.00322665	chrX	13475964	13477456	-	WBGene00029495	Cbr-efn-3	FALSE	FALSE	TRUE	-1.35
WBGene00017146	EGAP1.1	12.1057	1.30427	0.39371	3.31277	0.000923775	0.00401012	chrIII	5935749	5937220	-	WBGene00030706	CBG09039	FALSE	TRUE	FALSE	-1.77
WBGene00013486	egas-1	227.471	1.53092	0.186548	8.20656	2.27608e-16	9.64668e-15	chrV	18640337	18648392	+	WBGene00026379	CBG03530	FALSE	FALSE	FALSE	-2.02
WBGene00013487	egas-2	31.4385	1.74717	0.333933	5.23209	1.67602e-07	1.90042e-06	chrV	18650343	18656165	+	NaN	NaN	FALSE	TRUE	FALSE	-2.02
WBGene00001245	elo-7	17.4692	1.85983	0.373743	4.97623	6.48337e-07	6.45053e-06	chrIV	9529947	9531378	+	WBGene00039126	Cbr-elo-7	FALSE	FALSE	FALSE	-1.93
WBGene00001310	end-1	10.511	1.48134	0.405329	3.65466	0.000257519	0.00132693	chrV	13985137	13987072	+	WBGene00032529	Cbr-end-1	FALSE	FALSE	FALSE	-1.42
WBGene00001311	end-3	22.0149	2.68707	0.389961	6.89061	5.55528e-12	1.35666e-10	chrV	14014701	14015850	+	WBGene00032520	Cbr-end-3.2	FALSE	TRUE	TRUE	-2.25
WBGene00017532	ent-5	10.0703	1.78609	0.403571	4.42572	9.61216e-06	7.27061e-05	chrX	4647526	4649197	-	WBGene00034980	Cbr-ent-5	FALSE	FALSE	FALSE	-1.62
WBGene00021034	enu-3.4	38.0409	1.213	0.334231	3.62921	0.00028429	0.00144057	chrI	3364027	3365857	-	WBGene00037752	CBG18306	FALSE	FALSE	FALSE	-2.26
WBGene00045401	eol-1	34.6329	1.13411	0.325859	3.48038	0.000500701	0.00235124	chrV	13979571	13980907	-	WBGene00032530	Cbr-eol-1	FALSE	FALSE	FALSE	-1.47
WBGene00016870	ets-10	10.4288	1.40401	0.396779	3.53852	0.000402381	0.00194401	chrX	4284189	4284901	+	WBGene00034908	Cbr-ets-10	FALSE	FALSE	FALSE	-1.92
WBGene00008496	F01D5.6	319.456	2.1415	0.359914	5.95003	2.68096e-09	4.24376e-08	chrII	14006511	14008514	+	WBGene00039741	CBG20827	FALSE	TRUE	FALSE	-1.61
WBGene00017168	F01F1.14	14.6277	1.54117	0.389884	3.95289	7.72143e-05	0.000463972	chrIII	5882319	5882923	-	WBGene00030723	CBG09056	FALSE	TRUE	FALSE	-1.9
WBGene00008529	F02E9.3	12.9684	2.03188	0.401572	5.05983	4.19636e-07	4.39788e-06	chrI	8404547	8405955	-	WBGene00033624	CBG12718	FALSE	FALSE	FALSE	-2.1
WBGene00008545	F07A11.1	49.2998	2.60489	0.296152	8.79579	1.42051e-18	7.65297e-17	chrII	11588464	11592060	-	WBGene00025821	CBG02851	FALSE	FALSE	FALSE	-1.08
WBGene00008541	F07A5.2	45.6822	3.63764	0.35597	10.2189	1.63102e-24	1.40537e-22	chrI	7352415	7353701	+	WBGene00024924	CBG01735	FALSE	FALSE	FALSE	-2.22
WBGene00008543	F07A5.4	153.461	1.14918	0.183473	6.26349	3.76463e-10	6.80202e-09	chrI	7357180	7359100	-	WBGene00032956	CBG11927	FALSE	FALSE	FALSE	-2.12
WBGene00008550	F07B10.4	26.331	2.16451	0.343156	6.30765	2.83304e-10	5.22739e-09	chrV	11261264	11263116	-	WBGene00088477	CBG27063	FALSE	FALSE	FALSE	-1.99
WBGene00077514	F07B10.7	13.03	2.14561	0.399124	5.37579	7.62478e-08	9.19959e-07	chrV	11259312	11260722	-	NaN	NaN	FALSE	FALSE	FALSE	-2.11
WBGene00017188	F07B7.7	34.2076	1.01272	0.29981	3.37787	0.000730496	0.00327459	chrV	8835611	8836710	+	NaN	NaN	FALSE	FALSE	FALSE	NA
WBGene00017189	F07B7.8	15.6014	1.9463	0.390828	4.97993	6.36068e-07	6.34574e-06	chrV	8846203	8846835	-	WBGene00024094	CBG00753	FALSE	FALSE	FALSE	NA
WBGene00202511	F07C3.16	9.98828	1.80232	0.40556	4.44404	8.82866e-06	6.75631e-05	chrV	9255778	9257519	-	WBGene00038497	CBG19241	FALSE	FALSE	FALSE	-2.29
WBGene00008556	F07D3.3	13.8703	1.94842	0.402197	4.84443	1.26976e-06	1.1834e-05	chrV	9460686	9462705	-	WBGene00038527	CBG19280	FALSE	FALSE	FALSE	-2.17
WBGene00008559	F07H5.8	20.2275	1.12696	0.359837	3.13185	0.00173706	0.00687859	chrII	8801130	8804889	+	WBGene00026090	CBG03177	FALSE	FALSE	FALSE	-1.59
WBGene00045468	F08A8.8	13.7478	1.68726	0.388715	4.34061	1.4209e-05	0.000103491	chrI	12953969	12955322	-	WBGene00029829	CBG07942	FALSE	TRUE	FALSE	-2.11
WBGene00017271	F08F8.6	21.1253	1.44224	0.363559	3.96699	7.27873e-05	0.000439249	chrIII	7343675	7345855	+	WBGene00023969	CBG00596	FALSE	FALSE	FALSE	-1.04
WBGene00008577	F08G2.5	766.822	3.0785	0.339239	9.07473	1.13964e-19	6.67238e-18	chrII	13832870	13833653	-	NaN	NaN	FALSE	FALSE	FALSE	-1.26
WBGene00008591	F08H9.3	16.1939	1.47616	0.393742	3.74905	0.000177503	0.00095959	chrV	14461943	14462809	-	NaN	NaN	FALSE	FALSE	FALSE	-1.8
WBGene00017294	F09E10.1	74.8055	1.92029	0.34073	5.63581	1.74234e-08	2.37694e-07	chrX	1502860	1503278	+	NaN	NaN	FALSE	FALSE	FALSE	-1.65
WBGene00008640	F10B5.3	49.897	1.70601	0.296252	5.75866	8.47845e-09	1.22046e-07	chrII	8147190	8150030	-	WBGene00024085	CBG00742	FALSE	TRUE	FALSE	-1.38
WBGene00008661	F10G8.1	21.1963	2.98007	0.391684	7.60836	2.7759e-14	9.12486e-13	chrI	10019643	10021069	+	WBGene00037689	CBG18235	FALSE	FALSE	FALSE	-2.13
WBGene00008662	F10G8.2	15.6353	1.38559	0.370138	3.74343	0.000181524	0.000978718	chrI	10021702	10022872	-	NaN	NaN	FALSE	FALSE	FALSE	-2.07
WBGene00017396	F12A10.7	18.7397	2.45264	0.391669	6.26204	3.79985e-10	6.85211e-09	chrII	5497285	5498256	-	WBGene00025473	CBG02414	FALSE	FALSE	TRUE	-1.91
WBGene00077704	F12A10.9	23.0151	2.35208	0.367484	6.40051	1.5486e-10	2.96213e-09	chrII	5498710	5499150	+	WBGene00025474	CBG02415	FALSE	FALSE	TRUE	-1.98
WBGene00008724	F13A7.1	7.06305	1.38911	0.40168	3.45824	0.000543711	0.00252915	chrV	16376239	16377949	-	WBGene00042053	CBG23791	TRUE	TRUE	FALSE	-1.74
WBGene00008726	F13A7.11	127.835	1.75442	0.300463	5.83905	5.24999e-09	7.88017e-08	chrV	16394015	16395075	-	WBGene00032553	CBG11439	FALSE	FALSE	FALSE	-2.14
WBGene00008725	F13A7.7	6.19673	1.30942	0.399695	3.27604	0.00105273	0.00447421	chrV	16382167	16383829	-	WBGene00035597	CBG15287	FALSE	FALSE	FALSE	-1.68
WBGene00017441	F13H8.8	15.4104	1.18344	0.371887	3.18225	0.00146133	0.00593732	chrII	6265612	6268083	-	WBGene00035626	CBG15325	FALSE	FALSE	FALSE	-1.68
WBGene00008779	F14B4.1	92.7463	1.6913	0.220043	7.68623	1.51537e-14	5.19964e-13	chrI	9265951	9270919	-	WBGene00038687	CBG19478	FALSE	FALSE	FALSE	-2.13
WBGene00008812	F14F7.5	10.0415	1.8625	0.404651	4.60272	4.17002e-06	3.42508e-05	chrIII	13032001	13036344	+	WBGene00034070	CBG13291	FALSE	FALSE	TRUE	-1.89
WBGene00017467	F14F9.4	447.224	1.33906	0.194343	6.89019	5.57162e-12	1.35884e-10	chrV	5132741	5137100	+	WBGene00030434	CBG08684	FALSE	FALSE	FALSE	-2.24
WBGene00008850	F15B9.6	51.6494	1.64599	0.288021	5.71483	1.09815e-08	1.55142e-07	chrV	13014144	13016641	+	WBGene00031046	CBG09474	FALSE	TRUE	TRUE	-2.01
WBGene00008854	F15D3.4	11.1196	2.24688	0.405522	5.54071	3.01242e-08	3.92496e-07	chrI	11565238	11570803	+	WBGene00035622	CBG15321	FALSE	FALSE	FALSE	-2.03
WBGene00017484	F15E6.3	103.871	1.85979	0.303409	6.12965	8.80745e-10	1.51476e-08	chrIV	4294877	4295687	+	NaN	NaN	FALSE	FALSE	FALSE	-1.72
WBGene00017486	F15E6.5	4.63371	1.16721	0.383546	3.04322	0.00234064	0.00886697	chrIV	4289567	4290061	+	NaN	NaN	FALSE	FALSE	FALSE	-1.97
WBGene00008870	F15H9.1	7.0888	1.55835	0.405157	3.84628	0.000119926	0.000678026	chrI	12157151	12158712	+	WBGene00034356	CBG13612	FALSE	FALSE	TRUE	-1.79
WBGene00017525	F16G10.10	8.6568	1.89296	0.404654	4.67798	2.89709e-06	2.48339e-05	chrII	2389582	2390994	-	NaN	NaN	FALSE	FALSE	FALSE	-1.38
WBGene00017524	F16G10.9	10.6206	2.26323	0.404985	5.58843	2.29132e-08	3.05514e-07	chrII	2384186	2385595	-	NaN	NaN	TRUE	FALSE	FALSE	-1.51
WBGene00138716	F17B5.10	4.48934	1.21822	0.395546	3.07984	0.00207115	0.00799359	chrI	13189792	13190583	-	NaN	NaN	FALSE	FALSE	FALSE	-2.35
WBGene00008922	F17C11.11	2947.18	2.43875	0.350569	6.95653	3.48758e-12	8.73905e-11	chrV	10937633	10938849	-	WBGene00031199	CBG09641	FALSE	FALSE	TRUE	-2.16
WBGene00023503	F17C11.13	26.7303	1.22404	0.321592	3.80619	0.000141122	0.000782598	chrV	10955923	10957020	+	WBGene00041487	CBG23061	FALSE	FALSE	TRUE	-1.63
WBGene00008912	F17C8.7	100.905	2.36634	0.221645	10.6763	1.31448e-26	1.31932e-24	chrIII	4736050	4737258	+	WBGene00026461	CBG03643	FALSE	TRUE	TRUE	-1.71
WBGene00017545	F18A1.1	50.5116	3.04671	0.330879	9.20793	3.32481e-20	2.04493e-18	chrII	7684889	7689689	+	NaN	NaN	FALSE	FALSE	FALSE	-1.53
WBGene00194713	F19B10.13	27.7877	1.56513	0.337952	4.63123	3.63497e-06	3.03751e-05	chrII	3662204	3662618	+	NaN	NaN	FALSE	FALSE	FALSE	-1.86
WBGene00008944	F19B2.5	19156.3	2.72625	0.152127	17.9209	8.10117e-72	3.1486e-69	chrV	20162649	20164561	-	NaN	NaN	FALSE	TRUE	FALSE	-1.6
WBGene00008945	F19B2.6	4582.68	4.31033	0.317025	13.5962	4.21917e-42	8.37736e-40	chrV	20158523	20161788	+	NaN	NaN	FALSE	FALSE	FALSE	-1.17
WBGene00008946	F19B2.7	25.3509	2.973	0.392741	7.56987	3.73603e-14	1.20576e-12	chrV	20151732	20155442	+	NaN	NaN	FALSE	TRUE	FALSE	-1.99
WBGene00008949	F19B6.3	10.5358	1.25203	0.401892	3.11535	0.00183725	0.00721433	chrIV	12327190	12328718	+	NaN	NaN	FALSE	FALSE	FALSE	-2.15
WBGene00017593	F19C7.3	22.2448	1.73965	0.374932	4.63991	3.48561e-06	2.92743e-05	chrIV	4597195	4599002	+	WBGene00039289	CBG20260	FALSE	FALSE	FALSE	-1.76
WBGene00017610	F19G12.2	88.1738	1.31129	0.227476	5.76451	8.18931e-09	1.1835e-07	chrX	1427774	1430871	+	NaN	NaN	FALSE	FALSE	FALSE	-1.49
WBGene00017631	F20B6.7	6.17584	1.23178	0.397431	3.09934	0.00193952	0.00755903	chrX	4206830	4207477	-	NaN	NaN	FALSE	FALSE	FALSE	-1.98
WBGene00008970	F20C5.5	84.0421	1.25575	0.225309	5.57345	2.49746e-08	3.31308e-07	chrIV	8767688	8770092	-	NaN	NaN	FALSE	FALSE	FALSE	-1.73
WBGene00043069	F20D6.12	6.43685	1.68059	0.398264	4.21979	2.44529e-05	0.000167422	chrV	8188788	8190116	-	WBGene00303399	CBG31438	FALSE	FALSE	FALSE	-2.14
WBGene00303421	F20D6.15	3.53666	1.14774	0.37357	3.07235	0.00212384	0.00817105	chrV	8187803	8188467	-	WBGene00303400	CBG31439	FALSE	FALSE	FALSE	-2.19
WBGene00017650	F21A9.1	20.5805	1.28074	0.350572	3.65329	0.000258898	0.00133257	chrI	3712133	3713134	+	WBGene00033033	CBG12018	FALSE	TRUE	FALSE	-1.88
WBGene00017659	F21C10.10	1134.56	2.31609	0.2004	11.5574	6.77464e-31	8.41853e-29	chrV	9096007	9097233	+	WBGene00038452	CBG19189	FALSE	FALSE	TRUE	-2.22
WBGene00017672	F21F3.2	10.3876	1.26894	0.400629	3.16738	0.00153821	0.00620955	chrI	4903437	4905138	+	WBGene00030738	CBG09071	FALSE	FALSE	FALSE	-2.03
WBGene00017685	F21H12.3	29.1569	1.19501	0.327205	3.65216	0.00026004	0.00133694	chrII	6082912	6083506	+	NaN	NaN	FALSE	FALSE	FALSE	-1.43
WBGene00009043	F22B5.5	9.64847	1.94561	0.405598	4.79689	1.61152e-06	1.4602e-05	chrII	8453254	8454613	-	WBGene00023988	CBG00619	FALSE	FALSE	TRUE	-1.79
WBGene00009044	F22B5.6	6.28475	1.65209	0.402445	4.10512	4.041e-05	0.000261762	chrII	8454612	8456194	-	WBGene00270954	CBG30008	FALSE	FALSE	TRUE	-1.93
WBGene00009046	F22B8.3	42.0159	4.07547	0.371046	10.9837	4.57638e-28	4.83218e-26	chrV	16090985	16092117	+	NaN	NaN	TRUE	FALSE	FALSE	-1.77
WBGene00017712	F22E5.17	19.9241	2.87607	0.383213	7.50514	6.13631e-14	1.93596e-12	chrII	2678041	2679162	+	NaN	NaN	FALSE	FALSE	FALSE	-1.34
WBGene00017726	F22H10.2	93.0434	1.00386	0.283778	3.53749	0.00040395	0.00194798	chrX	16678488	16679823	+	NaN	NaN	FALSE	FALSE	FALSE	-2.01
WBGene00017743	F23F1.2	5.80636	1.25533	0.403396	3.11191	0.00185881	0.00728804	chrII	34204	35262	+	WBGene00029183	CBG07008	FALSE	FALSE	TRUE	-2.33
WBGene00017764	F25A2.1	105.544	1.56466	0.232745	6.72265	1.78448e-11	4.02931e-10	chrV	1179604	1181548	+	WBGene00024373	CBG01090	FALSE	FALSE	FALSE	-1.85
WBGene00009114	F25D7.5	59.4159	3.91436	0.345313	11.3357	8.73477e-30	1.00986e-27	chrI	10422958	10429026	-	WBGene00025291	CBG02205	FALSE	FALSE	FALSE	-2.12
WBGene00009115	F25F2.1	16.1932	1.75103	0.397252	4.40787	1.04394e-05	7.83679e-05	chrIII	4508855	4512162	+	WBGene00033980	CBG13180	FALSE	TRUE	FALSE	-1.82
WBGene00009123	F25H2.12	544.831	1.12451	0.108349	10.3785	3.10521e-25	2.80806e-23	chrI	10570079	10571916	+	WBGene00025339	CBG02258	FALSE	FALSE	FALSE	-2.15
WBGene00009125	F25H5.2	50.3202	1.2933	0.300861	4.29867	1.71823e-05	0.000122414	chrI	9179941	9181119	-	WBGene00032041	CBG10762	FALSE	FALSE	TRUE	-2.09
WBGene00009130	F25H5.8	8.34876	1.57514	0.405175	3.88755	0.000101259	0.000586462	chrI	9177664	9178703	-	WBGene00027660	CBG05141	FALSE	TRUE	FALSE	-2.01
WBGene00009147	F26C11.3	5.8141	1.45148	0.401419	3.61588	0.000299327	0.0015067	chrII	9903059	9915099	-	WBGene00024298	CBG00999	FALSE	FALSE	FALSE	-1.31
WBGene00045393	F26D11.13	7.14388	1.25842	0.405378	3.10431	0.0019072	0.00745216	chrV	7953354	7954652	-	NaN	NaN	FALSE	FALSE	FALSE	-2.08
WBGene00017819	F26D11.2	10.0691	1.42837	0.399211	3.57799	0.000346245	0.00170665	chrV	7959270	7960958	+	WBGene00030377	CBG08618	FALSE	TRUE	FALSE	-2.14
WBGene00017833	F26F12.2	9.92858	1.2603	0.404509	3.11562	0.00183556	0.00720923	chrV	5837572	5838613	-	NaN	NaN	FALSE	FALSE	FALSE	-2
WBGene00017838	F26G1.2	232.864	2.27773	0.196975	11.5636	6.30381e-31	7.8871e-29	chrII	4763081	4764174	+	WBGene00039565	CBG20616	FALSE	TRUE	TRUE	-1.63
WBGene00017839	F26G1.3	4.00474	1.2079	0.377191	3.20237	0.00136303	0.00560524	chrII	4758762	4759289	+	NaN	NaN	FALSE	FALSE	FALSE	-1.43
WBGene00009182	F26H11.4	749.693	4.33471	0.333235	13.008	1.1022e-38	1.89943e-36	chrII	14408612	14410836	+	WBGene00024279	CBG00978	FALSE	FALSE	TRUE	-1.55
WBGene00009193	F27E5.3	5.7898	1.5209	0.392857	3.87139	0.000108218	0.000619691	chrII	10141457	10144192	-	WBGene00024189	CBG00862	FALSE	FALSE	FALSE	-1.55
WBGene00017902	F28E10.4	14.0756	1.2072	0.379905	3.17763	0.00148483	0.00602342	chrIV	4566018	4567443	-	WBGene00030776	CBG09116	FALSE	FALSE	FALSE	-1.33
WBGene00017913	F29A7.3	116.966	1.02419	0.23092	4.43523	9.1972e-06	7.00605e-05	chrII	2753299	2754379	+	NaN	NaN	FALSE	FALSE	FALSE	-1.38
WBGene00017918	F29A7.8	5.70213	1.61131	0.39654	4.06344	4.83556e-05	0.000307881	chrII	2757147	2758054	-	NaN	NaN	FALSE	FALSE	FALSE	-1.65
WBGene00017921	F29B9.5	176.231	1.27788	0.179698	7.11128	1.14973e-12	3.09855e-11	chrIV	4652459	4653159	+	WBGene00024913	CBG01721	FALSE	TRUE	FALSE	-1.55
WBGene00017922	F29B9.7	12.2585	1.42147	0.389841	3.64627	0.00026607	0.00136372	chrIV	4649744	4650654	+	WBGene00024911	CBG01719	FALSE	FALSE	FALSE	-1.58
WBGene00017927	F29C4.4	25.4325	2.07846	0.356878	5.82402	5.74498e-09	8.53199e-08	chrIV	111465	111862	+	NaN	NaN	FALSE	FALSE	FALSE	-1.83
WBGene00017949	F31D5.6	11.4171	1.76749	0.396478	4.45798	8.27356e-06	6.36082e-05	chrII	4209738	4210066	+	NaN	NaN	FALSE	FALSE	FALSE	-1.4
WBGene00206414	F31D5.7	13.1755	1.89694	0.399465	4.7487	2.04725e-06	1.80837e-05	chrII	4211425	4213335	+	NaN	NaN	FALSE	FALSE	FALSE	-1.48
WBGene00009300	F31F6.1	5.52058	1.30782	0.389948	3.35383	0.000797016	0.00352336	chrX	14867101	14868300	-	NaN	NaN	FALSE	FALSE	FALSE	-1.74
WBGene00017965	F31F7.2	79.2311	1.09704	0.236647	4.63576	3.55632e-06	2.97997e-05	chrV	6270852	6274911	+	WBGene00038209	CBG18899	FALSE	FALSE	FALSE	-1.65
WBGene00017977	F32B5.3	18.5466	2.65479	0.396506	6.69546	2.14987e-11	4.77177e-10	chrI	2692757	2694084	+	WBGene00038264	CBG18972	FALSE	FALSE	FALSE	-1.29
WBGene00018019	F33H12.1	6.31139	1.36781	0.401538	3.40644	0.000658172	0.00298037	chrII	2600553	2601779	+	NaN	NaN	TRUE	FALSE	FALSE	-0.27
WBGene00018020	F33H12.6	411.288	4.44032	0.337672	13.1498	1.70666e-39	3.02676e-37	chrII	2594052	2598903	-	NaN	NaN	TRUE	FALSE	FALSE	-0.41
WBGene00045457	F33H12.7	218.723	2.34436	0.27508	8.52246	1.56193e-17	7.54086e-16	chrII	2586078	2586911	-	NaN	NaN	FALSE	TRUE	FALSE	-1.75
WBGene00009374	F34D10.4	464.196	1.29207	0.196356	6.58023	4.69728e-11	9.87401e-10	chrIII	3736602	3739765	+	WBGene00270386	CBG29958	FALSE	TRUE	FALSE	-2.21
WBGene00045484	F34D10.9	23.1753	1.50973	0.351402	4.2963	1.73671e-05	0.000123586	chrIII	3726683	3729570	-	WBGene00270519	CBG30281	FALSE	FALSE	FALSE	-2.12
WBGene00009378	F34H10.1	17.7006	1.98358	0.37866	5.23841	1.61968e-07	1.84226e-06	chrX	9626135	9626849	+	NaN	NaN	FALSE	FALSE	FALSE	-1.23
WBGene00018028	F35B3.1	16.5299	2.0609	0.379405	5.43192	5.57517e-08	6.90451e-07	chrX	17015297	17017814	+	WBGene00036058	CBG15971	FALSE	TRUE	TRUE	-1.63
WBGene00018031	F35B3.4	118.305	1.35918	0.245509	5.53617	3.09161e-08	4.02526e-07	chrX	17019616	17020958	-	WBGene00036060	CBG15974	FALSE	FALSE	FALSE	-2.07
WBGene00009401	F35C11.2	76.9925	2.64314	0.297274	8.89125	6.04249e-19	3.38583e-17	chrII	8244185	8246409	-	WBGene00036518	CBG16631	FALSE	TRUE	FALSE	-1.39
WBGene00009402	F35C11.3	9.53489	1.37026	0.405538	3.37888	0.000727806	0.00326414	chrII	8246776	8248263	+	WBGene00038892	CBG19720	FALSE	TRUE	FALSE	-1.15
WBGene00009392	F35C5.4	10.0866	2.24922	0.405005	5.55357	2.79898e-08	3.66516e-07	chrII	12890630	12892024	+	NaN	NaN	FALSE	TRUE	FALSE	-1.78
WBGene00009433	F35E12.9	1103.6	1.09347	0.134282	8.14305	3.85435e-16	1.59293e-14	chrV	13741321	13745127	-	NaN	NaN	FALSE	FALSE	FALSE	-2.2
WBGene00009409	F35E2.1	7.45578	1.68765	0.397661	4.24394	2.19624e-05	0.00015208	chrI	11738726	11740762	-	WBGene00026786	CBG04040	FALSE	FALSE	FALSE	-2.16
WBGene00009412	F35E2.5	23.8652	2.79461	0.38223	7.31135	2.64479e-13	7.81754e-12	chrI	11741603	11743951	-	WBGene00034352	CBG13608	FALSE	FALSE	TRUE	-2.06
WBGene00009458	F36A2.11	8.27612	1.93346	0.403174	4.7956	1.62188e-06	1.46813e-05	chrI	8822188	8823637	+	WBGene00033434	CBG12489	FALSE	FALSE	FALSE	-2
WBGene00023490	F36A2.14	13.7454	2.47575	0.403749	6.13191	8.68302e-10	1.49494e-08	chrI	8824401	8825628	-	WBGene00027053	CBG04362	FALSE	TRUE	TRUE	-1.98
WBGene00009489	F36G9.13	9.43975	1.83652	0.405219	4.53216	5.83823e-06	4.62878e-05	chrV	15983294	15986649	+	WBGene00087229	CBG25815	FALSE	FALSE	FALSE	-0.01
WBGene00009497	F36H1.12	3.97726	1.18143	0.375268	3.14823	0.00164262	0.00655718	chrIV	11052816	11053634	-	WBGene00028341	CBG05994	FALSE	FALSE	FALSE	-2.25
WBGene00009492	F36H1.3	21.3404	3.0823	0.394588	7.81144	5.654e-15	2.03564e-13	chrIV	11050128	11052430	+	WBGene00038897	CBG19727	FALSE	FALSE	TRUE	-2.09
WBGene00018110	F36H9.1	22.8256	2.63945	0.383748	6.8781	6.06578e-12	1.46954e-10	chrV	1794518	1797451	+	WBGene00033132	CBG12135	FALSE	FALSE	FALSE	-1.92
WBGene00268194	F36H9.10	75.2677	4.07984	0.343645	11.8722	1.64976e-32	2.26588e-30	chrV	1798200	1799694	+	WBGene00033132	CBG12135	FALSE	FALSE	FALSE	-1.92
WBGene00018134	F37A4.4	46.7268	3.47022	0.35636	9.73796	2.07681e-22	1.52358e-20	chrIII	6713583	6718022	+	WBGene00036472	CBG16570	FALSE	TRUE	FALSE	-1.37
WBGene00018135	F37A4.5	22.4887	3.04107	0.39197	7.75841	8.5998e-15	3.05034e-13	chrIII	6711869	6713191	+	WBGene00036473	CBG16572	FALSE	TRUE	FALSE	-0.91
WBGene00044005	F37C12.18	5.0127	1.36949	0.39438	3.47251	0.000515608	0.00241317	chrIII	7194094	7195425	-	WBGene00036519	CBG16633	FALSE	FALSE	FALSE	-1.08
WBGene00194742	F37C12.21	49.2725	1.3659	0.273718	4.99016	6.03288e-07	6.08183e-06	chrIII	7188357	7188971	+	NaN	NaN	FALSE	FALSE	FALSE	-1.45
WBGene00018182	F38E1.10	43.0678	3.73107	0.37476	9.95588	2.37711e-23	1.88794e-21	chrV	8374027	8375474	-	WBGene00032417	CBG11276	FALSE	FALSE	FALSE	-1.96
WBGene00018178	F38E1.3	60.5969	4.32009	0.349129	12.3739	3.61716e-35	5.74563e-33	chrV	8376117	8377944	+	WBGene00032415	CBG11274	FALSE	FALSE	FALSE	-1.91
WBGene00018179	F38E1.6	8.20889	1.42522	0.403278	3.53407	0.000409208	0.00196986	chrV	8360092	8361986	+	WBGene00032419	CBG11279	FALSE	FALSE	FALSE	-1.91
WBGene00009548	F38H4.4	5.0857	1.2237	0.400491	3.05551	0.00224681	0.00857455	chrIV	11848232	11850309	+	WBGene00030498	CBG08760	FALSE	FALSE	FALSE	-1.99
WBGene00009588	F40F11.3	550.282	3.61276	0.170314	21.2123	7.34619e-100	4.19352e-97	chrIV	11592351	11594003	-	WBGene00028448	CBG06121	FALSE	FALSE	FALSE	-1.75
WBGene00009589	F40F11.4	514.196	5.32211	0.203601	26.1399	1.28251e-150	1.56184e-147	chrIV	11588263	11592240	-	WBGene00028449	CBG06122	FALSE	FALSE	FALSE	-1.75
WBGene00018268	F41C3.2	4277.57	1.90189	0.251296	7.56832	3.78085e-14	1.21807e-12	chrII	4749968	4751822	+	WBGene00039573	CBG20625	FALSE	TRUE	TRUE	-1.37
WBGene00018292	F41E6.11	13.5311	1.30712	0.390141	3.35038	0.000807002	0.00356247	chrV	8619925	8621348	-	WBGene00024705	CBG01472	FALSE	TRUE	FALSE	-2.11
WBGene00009622	F41E7.6	48.1249	2.43355	0.329659	7.38203	1.55892e-13	4.7225e-12	chrX	10307137	10310466	-	WBGene00036912	CBG17205	FALSE	FALSE	FALSE	-1.65
WBGene00018322	F41H10.12	9.90916	1.74336	0.405323	4.30116	1.69904e-05	0.000121236	chrIV	5385320	5386080	+	NaN	NaN	FALSE	FALSE	FALSE	-2.06
WBGene00023423	F43C1.7	19.2101	1.54404	0.376233	4.10396	4.06146e-05	0.000262901	chrIII	4241477	4242593	-	WBGene00040076	CBG21241	FALSE	FALSE	FALSE	-1.68
WBGene00018385	F43C11.8	136.628	3.46359	0.25535	13.5641	6.5354e-42	1.28368e-39	chrII	2332520	2334338	+	NaN	NaN	TRUE	FALSE	FALSE	0.55
WBGene00018397	F43E2.11	22.7859	1.23684	0.349819	3.53566	0.00040676	0.0019605	chrII	7369251	7370309	-	WBGene00033958	CBG13149	TRUE	TRUE	FALSE	-1.42
WBGene00018394	F43E2.6	45.3086	2.02279	0.304014	6.65361	2.85998e-11	6.22684e-10	chrII	7366591	7369049	-	NaN	NaN	FALSE	TRUE	FALSE	-1.42
WBGene00219378	F43G6.17	6.65616	1.55624	0.399111	3.89926	9.64868e-05	0.000563287	chrII	11802751	11803978	+	WBGene00026050	Cbr-hda-5	FALSE	FALSE	FALSE	0.12
WBGene00206377	F44E5.15	17.7779	2.07714	0.397426	5.22648	1.72765e-07	1.9529e-06	chrII	11771978	11774039	+	NaN	NaN	FALSE	FALSE	FALSE	-1.16
WBGene00009689	F44E5.2	46.0426	3.33732	0.375691	8.88315	6.49928e-19	3.63066e-17	chrII	11766772	11768622	+	WBGene00042481	CBG24348	FALSE	FALSE	FALSE	-1.35
WBGene00009690	F44E5.3	229.45	1.91256	0.402772	4.74849	2.04944e-06	1.80943e-05	chrII	11762166	11765662	-	WBGene00023574	CBG00082	FALSE	FALSE	TRUE	-1.22
WBGene00009691	F44E5.4	517402	5.65449	0.268301	21.0752	1.34411e-98	7.44025e-96	chrII	11757106	11759323	-	WBGene00034024	CBG13233	FALSE	TRUE	TRUE	-1.26
WBGene00009692	F44E5.5	1.18795e+06	5.42196	0.26191	20.7016	3.34975e-95	1.74828e-92	chrII	11759640	11761853	+	WBGene00034024	CBG13233	FALSE	TRUE	FALSE	-0.89
WBGene00018471	F45E4.6	19.4546	2.73067	0.389539	7.01	2.38314e-12	6.14871e-11	chrIV	7630718	7632672	-	WBGene00028282	CBG05925	FALSE	FALSE	TRUE	-2.03
WBGene00009747	F46A8.4	7.36749	1.83822	0.404776	4.54133	5.58995e-06	4.45708e-05	chrI	11241225	11241970	-	NaN	NaN	FALSE	FALSE	FALSE	-2.01
WBGene00009748	F46A8.5	9.19047	1.55649	0.404995	3.84324	0.000121419	0.000685192	chrI	11239684	11240473	-	NaN	NaN	FALSE	FALSE	FALSE	-1.83
WBGene00045253	F46C3.6	115.474	1.18498	0.250668	4.72726	2.27567e-06	1.98708e-05	chrX	11419108	11420074	-	WBGene00271336	CBG30718	FALSE	FALSE	FALSE	-2.1
WBGene00009788	F46F2.4	28.8361	3.12118	0.393701	7.92779	2.23072e-15	8.41912e-14	chrX	15257597	15259048	+	NaN	NaN	FALSE	FALSE	FALSE	-1.58
WBGene00303398	F46H5.11	9.35753	1.59824	0.405561	3.94081	8.12072e-05	0.000483826	chrX	7269667	7272067	-	WBGene00303396	CBG31437	FALSE	FALSE	FALSE	-1.52
WBGene00009811	F47B8.10	68.6843	2.39933	0.298123	8.04813	8.40681e-16	3.31679e-14	chrV	14343068	14346964	+	WBGene00027271	CBG04634	FALSE	TRUE	FALSE	-1.89
WBGene00018551	F47C12.8	22.4884	3.00508	0.381471	7.87762	3.3367e-15	1.22639e-13	chrIV	3998053	3998607	-	NaN	NaN	FALSE	TRUE	FALSE	-2.1
WBGene00018563	F47D12.7	8.57305	1.23757	0.404444	3.05992	0.00221398	0.00847324	chrIII	6293247	6296022	-	WBGene00034086	CBG13307	FALSE	FALSE	TRUE	-1.7
WBGene00018602	F48D6.4	1159.93	1.45012	0.289614	5.00706	5.52668e-07	5.6261e-06	chrX	4246554	4247212	-	WBGene00034897	CBG14374	FALSE	FALSE	FALSE	-2.25
WBGene00018624	F48G7.13	26.9312	1.42903	0.334244	4.27542	1.90777e-05	0.000134138	chrV	615576	616728	+	WBGene00031852	CBG10468	TRUE	TRUE	FALSE	-1.06
WBGene00018619	F48G7.8	85.3601	1.40205	0.285081	4.91808	8.7395e-07	8.4692e-06	chrV	627095	627650	-	WBGene00037429	CBG17919	TRUE	FALSE	FALSE	-0.87
WBGene00044031	F49C5.9	9.53492	1.68115	0.405599	4.14485	3.40033e-05	0.000224562	chrII	12542754	12544633	-	WBGene00040553	CBG21877	FALSE	FALSE	FALSE	-1.88
WBGene00009893	F49E11.7	20.3918	2.86376	0.402709	7.11124	1.15006e-12	3.09855e-11	chrIV	13053297	13055154	+	NaN	NaN	FALSE	FALSE	FALSE	-2.1
WBGene00235363	F49F1.2	7.70524	1.89023	0.405115	4.6659	3.0727e-06	2.61552e-05	chrIV	4115943	4116101	+	WBGene00033565	CBG12647	FALSE	FALSE	FALSE	-1.93
WBGene00018694	F52E1.5	225.383	2.73455	0.247273	11.0588	1.98646e-28	2.13451e-26	chrV	8379474	8383747	+	WBGene00032416	CBG11275	FALSE	FALSE	FALSE	-2.08
WBGene00018711	F52G3.3	734.973	6.01964	0.214495	28.0642	2.68069e-173	4.08068e-170	chrX	16944877	16948026	-	NaN	NaN	FALSE	FALSE	FALSE	-1.85
WBGene00018712	F52G3.4	631.751	6.2379	0.207121	30.1172	2.88907e-199	5.86385e-196	chrX	16948355	16952113	-	WBGene00088265	CBG26851	FALSE	FALSE	TRUE	-1.98
WBGene00009948	F52H3.6	17.8431	1.49056	0.369143	4.0379	5.39318e-05	0.000338663	chrII	10026595	10027966	-	WBGene00024318	CBG01025	FALSE	FALSE	FALSE	-1.87
WBGene00194870	F53A2.11	6.83578	1.23505	0.40391	3.05774	0.00223012	0.00852607	chrIII	13319265	13321892	-	NaN	NaN	FALSE	FALSE	FALSE	-1.94
WBGene00009956	F53B2.5	12.4298	1.49434	0.40135	3.72329	0.000196644	0.00104848	chrIV	12528529	12531166	-	WBGene00033361	CBG12407	FALSE	FALSE	FALSE	-2.28
WBGene00009957	F53B2.8	519.792	1.0937	0.324249	3.37303	0.000743466	0.00332132	chrIV	12526260	12527339	-	NaN	NaN	FALSE	FALSE	FALSE	-2.12
WBGene00018745	F53C3.1	7.96975	1.47195	0.405559	3.62942	0.000284058	0.00144016	chrII	3912003	3913385	+	NaN	NaN	FALSE	FALSE	FALSE	-1.8
WBGene00018754	F53C3.11	27.4026	3.20763	0.370391	8.66013	4.7123e-18	2.43163e-16	chrII	3904816	3906620	-	NaN	NaN	FALSE	FALSE	FALSE	-1.95
WBGene00010000	F53F8.3	16.4762	1.42616	0.374985	3.80325	0.000142813	0.000790532	chrV	20688734	20689532	-	NaN	NaN	FALSE	FALSE	FALSE	-1.72
WBGene00010034	F54B11.11	420.066	2.10168	0.205279	10.2382	1.33748e-24	1.16899e-22	chrX	13578783	13581728	+	WBGene00029475	CBG07418	FALSE	FALSE	FALSE	-1.72
WBGene00010014	F54B3.2	12.4459	1.45415	0.397634	3.65699	0.00025519	0.00131868	chrII	10268143	10270152	-	WBGene00024175	CBG00845	FALSE	FALSE	FALSE	-1.53
WBGene00018813	F54D11.3	31.9195	1.72176	0.32567	5.28683	1.24455e-07	1.44069e-06	chrV	4635327	4637145	-	NaN	NaN	FALSE	FALSE	FALSE	-2.37
WBGene00010053	F54D5.9	456.355	1.29784	0.170583	7.60829	2.77737e-14	9.12486e-13	chrII	11542636	11544875	-	WBGene00025833	CBG02863	FALSE	TRUE	TRUE	-1.85
WBGene00010069	F54F11.1	20.4261	1.11962	0.362556	3.08814	0.00201416	0.00780909	chrII	13504082	13506905	+	WBGene00039692	CBG20767	FALSE	FALSE	FALSE	-0.57
WBGene00010072	F54F12.1	88.46	2.38169	0.250383	9.51221	1.86659e-21	1.27704e-19	chrIII	13049588	13055485	-	WBGene00035485	CBG15158	FALSE	FALSE	FALSE	-1.97
WBGene00045247	F54H12.8	18.9141	1.37021	0.381356	3.59301	0.000326882	0.00162658	chrIII	7966601	7969221	-	WBGene00041386	CBG22939	FALSE	FALSE	FALSE	-1.8
WBGene00018841	F54H5.5	5.94271	1.51604	0.398479	3.80457	0.000142051	0.000786732	chrII	6625949	6627282	-	WBGene00025504	CBG02455	FALSE	FALSE	FALSE	-1.98
WBGene00010085	F55B11.3	450.537	1.02503	0.124862	8.20931	2.22468e-16	9.46428e-15	chrIV	14424693	14425859	+	WBGene00035732	CBG15480	FALSE	FALSE	FALSE	-0.79
WBGene00010108	F55C10.4	17.5037	2.85916	0.393187	7.27176	3.54827e-13	1.0272e-11	chrV	11386698	11388678	+	WBGene00041589	CBG23186	FALSE	FALSE	FALSE	-2.04
WBGene00010103	F55C9.6	16.3458	2.8385	0.398021	7.13154	9.92545e-13	2.70609e-11	chrV	19293632	19296823	-	WBGene00034154	CBG13378	FALSE	FALSE	FALSE	-0.45
WBGene00018899	F55G1.1	16.4507	1.16275	0.372782	3.11913	0.00181388	0.00713484	chrIV	7491771	7493764	+	WBGene00028251	CBG05888	FALSE	FALSE	FALSE	-1.98
WBGene00044427	F56A6.5	12.1848	2.31286	0.403354	5.73407	9.80468e-09	1.39705e-07	chrI	582288	583748	-	WBGene00086653	CBG25239	FALSE	TRUE	FALSE	-1.97
WBGene00235390	F56A6.8	4.99204	1.38736	0.387302	3.58213	0.000340809	0.00168486	chrI	585119	585376	+	NaN	NaN	FALSE	TRUE	FALSE	-1.85
WBGene00010142	F56A8.8	67.4244	1.12341	0.254895	4.40735	1.04643e-05	7.85012e-05	chrIII	13285817	13286779	+	WBGene00030280	CBG08500	FALSE	TRUE	TRUE	-2.2
WBGene00010152	F56D5.9	13.6119	2.43709	0.397733	6.12745	8.92972e-10	1.53308e-08	chrIV	9418432	9422506	-	NaN	NaN	FALSE	FALSE	FALSE	-1.79
WBGene00010155	F56F3.4	16.2049	1.30235	0.379644	3.43044	0.000602605	0.00276508	chrIII	4468878	4470808	+	WBGene00041381	CBG22933	FALSE	FALSE	FALSE	-1.62
WBGene00018980	F56F4.3	4.85114	1.38616	0.387373	3.57835	0.000345772	0.00170478	chrI	6141469	6144386	+	WBGene00037573	CBG18082	FALSE	FALSE	FALSE	-2.19
WBGene00010163	F56H6.2	16.2969	1.26081	0.369629	3.41101	0.000647222	0.00293734	chrI	12287199	12289307	+	WBGene00040646	CBG21994	FALSE	FALSE	FALSE	-2.35
WBGene00010177	F57A8.1	7804.47	2.51163	0.125937	19.9435	1.70745e-88	8.42972e-86	chrV	10037340	10048726	+	WBGene00027437	CBG04834	FALSE	TRUE	FALSE	-2.33
WBGene00010181	F57A8.6	14.8002	2.48444	0.397741	6.24638	4.20075e-10	7.52305e-09	chrV	10071945	10073893	-	WBGene00030369	CBG08610	FALSE	FALSE	FALSE	-2.24
WBGene00010182	F57A8.7	15.4823	2.68188	0.396887	6.75728	1.4061e-11	3.20264e-10	chrV	10075749	10077804	+	WBGene00030368	CBG08609	FALSE	FALSE	FALSE	-2.28
WBGene00018997	F57B9.3	54.8373	1.6416	0.301377	5.44699	5.12285e-08	6.37895e-07	chrIII	6939888	6941736	+	WBGene00036400	Cbr-inf-1	FALSE	FALSE	FALSE	-1.25
WBGene00019015	F57F4.1	11.7671	1.55913	0.404452	3.85492	0.000115767	0.000657562	chrV	6390463	6392523	+	WBGene00038225	CBG18926	FALSE	FALSE	FALSE	-0.71
WBGene00019020	F57H12.5	81.6396	1.01072	0.257663	3.92265	8.75794e-05	0.000517069	chrIV	7967363	7969600	+	WBGene00025788	CBG02807	FALSE	FALSE	FALSE	-2.14
WBGene00010249	F58D12.1	5.10261	1.24309	0.400994	3.10002	0.00193505	0.00754806	chrV	14049574	14054663	+	NaN	NaN	FALSE	FALSE	FALSE	-1.98
WBGene00050929	F58D12.5	12.2447	1.80809	0.396905	4.55547	5.22674e-06	4.20417e-05	chrV	14048817	14049660	-	NaN	NaN	FALSE	FALSE	FALSE	-1.98
WBGene00206469	F58D2.5	32.7231	1.36991	0.329114	4.16241	3.14905e-05	0.000209788	chrIV	13189157	13193249	-	NaN	NaN	FALSE	FALSE	FALSE	-2.28
WBGene00010245	F58D5.6	6.47553	1.56735	0.403712	3.88235	0.000103453	0.000596142	chrI	12034072	12037230	+	WBGene00030659	CBG08981	FALSE	TRUE	TRUE	-2.04
WBGene00077697	F58E6.13	73.9323	2.37449	0.295768	8.02824	9.88817e-16	3.87612e-14	chrV	9745240	9749228	+	WBGene00038600	CBG19364	FALSE	FALSE	FALSE	-2.02
WBGene00010254	F58E6.5	18.0079	2.87622	0.398153	7.2239	5.05163e-13	1.4396e-11	chrV	9753423	9754581	-	WBGene00029898	CBG08027	FALSE	FALSE	TRUE	-2.15
WBGene00010255	F58E6.6	14.8222	2.09001	0.405596	5.15295	2.56419e-07	2.79643e-06	chrV	9752076	9752861	-	WBGene00040983	CBG22424	FALSE	FALSE	FALSE	-2.1
WBGene00010257	F58E6.8	12.5392	2.34011	0.402859	5.80875	6.29407e-09	9.26461e-08	chrV	9755076	9755808	-	WBGene00040983	CBG22424	FALSE	FALSE	FALSE	-2.15
WBGene00019059	F58F9.6	8.81916	1.95861	0.405496	4.83015	1.36428e-06	1.26247e-05	chrIV	6235977	6237543	-	NaN	NaN	FALSE	FALSE	FALSE	-0.55
WBGene00044306	F58F9.8	3.87441	1.19179	0.376248	3.16757	0.00153717	0.0062068	chrIV	6238192	6239437	+	NaN	NaN	FALSE	FALSE	FALSE	-0.79
WBGene00010269	F58G1.7	442.235	1.19459	0.180088	6.63337	3.28108e-11	7.04296e-10	chrII	12943862	12948143	-	WBGene00025753	CBG02762	FALSE	FALSE	FALSE	-2.08
WBGene00010289	F58H1.6	18.2737	1.5589	0.380354	4.09854	4.15762e-05	0.00026827	chrV	11942625	11944656	+	WBGene00041710	CBG23337	FALSE	FALSE	FALSE	-2.11
WBGene00010297	F59A1.11	61.4576	1.29548	0.283889	4.56333	5.03491e-06	4.07319e-05	chrV	17661802	17665475	-	WBGene00028087	CBG05684	FALSE	FALSE	TRUE	-0.89
WBGene00044664	F59A6.11	9.32527	1.83107	0.404433	4.5275	5.96844e-06	4.72791e-05	chrII	4998007	4998757	-	WBGene00039799	CBG20893	FALSE	FALSE	FALSE	-1.59
WBGene00019085	F59A6.3	5.68205	1.45503	0.390007	3.73079	0.000190882	0.00102148	chrII	5008341	5011179	+	WBGene00027334	CBG04714	FALSE	FALSE	FALSE	-1.7
WBGene00019086	F59A6.4	8.32271	1.85435	0.405549	4.57243	4.82099e-06	3.91226e-05	chrII	5005081	5008068	+	WBGene00039780	CBG20869	FALSE	TRUE	FALSE	-1.81
WBGene00019099	F59B1.6	7.25572	1.34917	0.405438	3.32769	0.000875696	0.00381866	chrV	3629473	3631691	-	WBGene00028896	CBG06651	FALSE	FALSE	FALSE	-2.53
WBGene00019100	F59B1.8	504.879	1.74217	0.188421	9.24615	2.32725e-20	1.46593e-18	chrV	3641858	3644243	-	WBGene00024646	CBG01400	FALSE	FALSE	FALSE	-2.29
WBGene00010314	F59B2.12	17.7812	2.41587	0.385445	6.26775	3.66304e-10	6.63159e-09	chrIII	9017607	9020960	+	WBGene00029072	CBG06873	FALSE	FALSE	FALSE	-1.47
WBGene00050931	F59B2.14	11.1817	1.41381	0.396035	3.56992	0.000357097	0.00175211	chrIII	9021370	9022635	-	NaN	NaN	FALSE	FALSE	FALSE	-1.64
WBGene00185006	F59B2.15	9.6167	1.76182	0.405424	4.34563	1.38875e-05	0.000101433	chrIII	9002054	9002636	-	WBGene00029057	CBG06852	FALSE	FALSE	FALSE	-1.93
WBGene00045272	F59C12.4	1446.19	3.00318	0.101294	29.6482	3.58254e-193	5.94929e-190	chrX	16602445	16602717	-	NaN	NaN	FALSE	TRUE	FALSE	-1.87
WBGene00206464	F59C6.18	63.4454	1.59613	0.308264	5.17781	2.24508e-07	2.47651e-06	chrI	10516036	10516432	-	NaN	NaN	FALSE	FALSE	FALSE	-2.17
WBGene00019136	F59H6.5	1073.14	3.78243	0.389602	9.70846	2.77486e-22	2.00349e-20	chrII	2003377	2008250	+	NaN	NaN	TRUE	FALSE	FALSE	-1.67
WBGene00013226	faah-5	13.1706	1.27105	0.386519	3.28846	0.00100737	0.00431761	chrIII	11886485	11891435	-	WBGene00034088	CBG13309	FALSE	FALSE	FALSE	-1.68
WBGene00010534	fbxa-102	4.2608	1.11964	0.370112	3.02514	0.00248514	0.00931776	chrV	17492077	17493832	-	NaN	NaN	TRUE	FALSE	FALSE	-0.65
WBGene00007672	fbxa-136	199.061	1.37215	0.235069	5.8372	5.30847e-09	7.95487e-08	chrV	17521037	17527479	+	WBGene00042110	CBG23863	FALSE	FALSE	FALSE	-2.31
WBGene00007323	fbxa-155	8.86364	1.73293	0.405522	4.27333	1.92577e-05	0.00013523	chrIII	10007966	10010177	-	NaN	NaN	FALSE	FALSE	FALSE	-1.57
WBGene00015602	fbxa-158	16.2588	1.40686	0.397966	3.53512	0.000407583	0.00196343	chrII	1619894	1621261	-	WBGene00042195	CBG23976	FALSE	FALSE	FALSE	-0.65
WBGene00044655	fbxa-194	14.5294	1.16072	0.373772	3.10542	0.00190008	0.00742911	chrV	19777247	19778708	-	NaN	NaN	TRUE	FALSE	FALSE	-1.76
WBGene00016527	fbxa-47	14.5555	1.40778	0.394267	3.57062	0.00035613	0.00174877	chrIII	2229992	2232460	-	NaN	NaN	TRUE	FALSE	FALSE	-1.9
WBGene00021862	fbxa-48	144.768	5.32211	0.31119	17.1025	1.42277e-65	4.90372e-63	chrIII	2266980	2272175	-	NaN	NaN	TRUE	TRUE	FALSE	-1.69
WBGene00021262	fbxa-74	246.483	1.29667	0.212069	6.11439	9.69268e-10	1.65318e-08	chrIII	1697221	1698986	-	NaN	NaN	FALSE	FALSE	FALSE	0.44
WBGene00022495	fbxa-78	73.0626	1.16431	0.277666	4.1932	2.75043e-05	0.00018622	chrIII	1257213	1258414	-	NaN	NaN	FALSE	TRUE	FALSE	-1.16
WBGene00013453	fbxa-83	19.2141	1.63205	0.359742	4.53672	5.71366e-06	4.55174e-05	chrIV	14323244	14325665	-	NaN	NaN	FALSE	FALSE	FALSE	-2.03
WBGene00008632	fbxa-88	22.7476	1.20196	0.34908	3.44321	0.000574847	0.00265256	chrV	16142008	16143116	-	NaN	NaN	FALSE	FALSE	FALSE	-1.28
WBGene00021860	fbxa-9	20.0569	1.25297	0.3515	3.56463	0.000364364	0.00178441	chrIII	2266651	2268300	+	NaN	NaN	FALSE	FALSE	FALSE	-2.45
WBGene00022494	fbxa-91	117.676	1.34396	0.237236	5.66507	1.46965e-08	2.02459e-07	chrIII	1253384	1254401	-	NaN	NaN	FALSE	FALSE	FALSE	-1.45
WBGene00018746	fbxb-103	24.6784	3.07045	0.374637	8.19581	2.48906e-16	1.05249e-14	chrII	3907140	3908478	+	NaN	NaN	FALSE	FALSE	FALSE	-1.95
WBGene00017911	fbxb-106	5.46012	1.57086	0.39525	3.97435	7.05725e-05	0.000428035	chrII	2762417	2763477	+	NaN	NaN	FALSE	FALSE	FALSE	-1.67
WBGene00017912	fbxb-107	6.04555	1.66902	0.398238	4.19101	2.77712e-05	0.000187749	chrII	2758625	2761856	+	NaN	NaN	FALSE	FALSE	FALSE	-1.62
WBGene00017249	fbxb-108	5.65836	1.42571	0.401245	3.55321	0.000380564	0.0018538	chrII	2764964	2767230	+	NaN	NaN	FALSE	FALSE	FALSE	-1.75
WBGene00010099	fbxb-117	27.332	3.23204	0.389794	8.29167	1.11665e-16	4.91516e-15	chrV	19282614	19284594	+	NaN	NaN	TRUE	TRUE	FALSE	-1.84
WBGene00021098	fbxb-14	83.9164	1.61945	0.399509	4.05362	5.04319e-05	0.00031921	chrII	582111	582862	-	NaN	NaN	FALSE	FALSE	FALSE	-1.89
WBGene00013230	fbxb-22	31.7434	3.38942	0.380972	8.89676	5.75012e-19	3.23192e-17	chrIII	11882594	11883562	-	NaN	NaN	FALSE	FALSE	FALSE	-1.56
WBGene00010104	fbxb-60	9.56503	1.9097	0.405597	4.70838	2.49698e-06	2.16686e-05	chrV	19297810	19298749	+	NaN	NaN	TRUE	FALSE	FALSE	-0.55
WBGene00014149	fbxb-70	42.4301	3.15763	0.347407	9.08914	9.98274e-20	5.8635e-18	chrI	14955647	14957097	-	NaN	NaN	FALSE	FALSE	FALSE	-1.86
WBGene00019243	fbxb-72	67.1067	3.04125	0.286322	10.6218	2.36026e-26	2.33053e-24	chrV	722695	723827	-	NaN	NaN	FALSE	FALSE	FALSE	-1.33
WBGene00019921	fbxc-34	10.8452	2.20793	0.405421	5.44601	5.15118e-08	6.40113e-07	chrII	931171	932327	+	NaN	NaN	FALSE	FALSE	FALSE	-2.11
WBGene00015615	fbxc-48	5.7451	1.51091	0.398527	3.79124	0.000149895	0.000825984	chrII	739598	740852	-	NaN	NaN	FALSE	FALSE	FALSE	-1.7
WBGene00019668	fil-2	395.439	3.62875	0.347983	10.4279	1.84852e-25	1.7228e-23	chrV	6279005	6280146	+	WBGene00038211	Cbr-fil-2	FALSE	FALSE	TRUE	-1.75
WBGene00007990	fipr-23	18.7597	1.19052	0.361798	3.29057	0.000999843	0.00429263	chrI	14153270	14154168	-	NaN	NaN	FALSE	FALSE	FALSE	-1.03
WBGene00001435	fkh-3	11.591	2.09774	0.405398	5.17453	2.28479e-07	2.51575e-06	chrX	13421824	13423427	-	NaN	NaN	FALSE	FALSE	FALSE	-1.69
WBGene00017693	flp-23	4.28538	1.15606	0.372979	3.09953	0.00193827	0.00755576	chrIII	8650764	8652190	+	WBGene00087515	Cbr-flp-23	FALSE	FALSE	FALSE	-1.26
WBGene00017661	frpr-6	155.075	1.36595	0.247387	5.52154	3.36048e-08	4.34436e-07	chrV	9099638	9101133	-	WBGene00038454	Cbr-frpr-6	FALSE	FALSE	FALSE	-1.9
WBGene00008144	gasr-8	249.58	3.04184	0.374375	8.1251	4.47012e-16	1.82267e-14	chrV	14689154	14691861	+	WBGene00027204	Cbr-gasr-8	FALSE	TRUE	TRUE	-1.72
WBGene00001554	gcy-34	162.745	1.99616	0.214702	9.29737	1.43957e-20	9.22687e-19	chrV	13383019	13385898	-	WBGene00028962	Cbr-gcy-34	FALSE	FALSE	TRUE	-2.07
WBGene00016440	gipc-1	53.3015	3.00195	0.302182	9.93423	2.95442e-23	2.32622e-21	chrIII	4870762	4872046	+	WBGene00037491	Cbr-gipc-2	FALSE	FALSE	FALSE	-1.52
WBGene00022284	glb-33	1778.13	1.58285	0.169966	9.31274	1.2458e-20	8.04134e-19	chrV	1352126	1356587	+	WBGene00028702	Cbr-glb-33	FALSE	FALSE	FALSE	-1.93
WBGene00001603	gln-2	32.1404	3.39935	0.36679	9.26784	1.89954e-20	1.20902e-18	chrIII	9943243	9944823	-	WBGene00039586	Cbr-gln-2.1	FALSE	TRUE	FALSE	-0.24
WBGene00001606	gln-5	109.867	1.06678	0.195622	5.45326	4.94546e-08	6.17644e-07	chrIV	17272231	17273652	-	WBGene00039019	CBG19879	FALSE	FALSE	FALSE	0.57
WBGene00006448	glod-4	744.407	1.111	0.137244	8.09507	5.72311e-16	2.28762e-14	chrIII	4153599	4154650	+	WBGene00039226	Cbr-glod-4	FALSE	TRUE	TRUE	-2.15
WBGene00001639	gly-14	38.0825	1.81001	0.304241	5.94927	2.6934e-09	4.25976e-08	chrIII	3490363	3493234	-	WBGene00031306	Cbr-gly-14	FALSE	FALSE	FALSE	-0.8
WBGene00001640	gly-15	12.6628	2.20097	0.401934	5.47596	4.3515e-08	5.50859e-07	chrI	12462176	12465831	+	WBGene00027054	Cbr-gly-15	FALSE	FALSE	FALSE	-1.87
WBGene00008092	gmeb-3	14.3092	2.23695	0.397343	5.62977	1.80445e-08	2.45618e-07	chrIII	3768500	3770321	+	NaN	NaN	FALSE	FALSE	FALSE	-1.96
WBGene00013871	gnrr-3	26.6136	1.01803	0.324037	3.1417	0.00167968	0.0066803	chrX	10049460	10052481	+	WBGene00025102	Cbr-gnrr-3	FALSE	FALSE	FALSE	-1.53
WBGene00001667	gpa-5	54.414	1.24424	0.267231	4.65604	3.22346e-06	2.72606e-05	chrX	2118894	2121061	-	WBGene00034703	Cbr-gpa-5	FALSE	FALSE	FALSE	-1.84
WBGene00001683	gpd-1	453.196	1.22802	0.144922	8.47368	2.37763e-17	1.12228e-15	chrII	10394114	10395349	+	WBGene00024150	CBG00820	FALSE	FALSE	FALSE	-1.61
WBGene00001696	grd-7	9.3092	1.43638	0.405165	3.54517	0.000392362	0.00190169	chrX	7267989	7269479	-	WBGene00032219	Cbr-grd-7	FALSE	FALSE	FALSE	-1.63
WBGene00001697	grd-8	19.2722	2.44266	0.405275	6.02716	1.66868e-09	2.74116e-08	chrV	7842543	7844299	+	WBGene00039523	Cbr-grd-8	FALSE	FALSE	TRUE	-2.07
WBGene00001726	grl-17	25.2728	2.73248	0.376506	7.25747	3.94402e-13	1.13279e-11	chrV	13562105	13563913	-	WBGene00032647	Cbr-grl-17	FALSE	FALSE	TRUE	-2.07
WBGene00001730	grl-21	869.37	1.54347	0.360755	4.27843	1.88212e-05	0.00013254	chrIV	10737474	10738189	+	WBGene00037215	Cbr-grl-21	FALSE	FALSE	FALSE	-2.26
WBGene00001734	grl-25	6.80281	1.40386	0.398616	3.52184	0.000428569	0.00205315	chrIII	8962295	8965638	+	WBGene00029065	Cbr-grl-25	FALSE	FALSE	FALSE	-1.6
WBGene00001735	grl-26	8.20532	1.47526	0.404775	3.64465	0.000267758	0.00137037	chrIV	321571	323022	-	WBGene00041080	Cbr-grl-26	FALSE	FALSE	FALSE	-1.73
WBGene00012840	grsp-1	328.859	1.67449	0.151673	11.0401	2.44739e-28	2.59921e-26	chrV	19609494	19612099	+	NaN	NaN	FALSE	FALSE	FALSE	-1.15
WBGene00001749	gst-1	8563.1	1.08925	0.14965	7.27868	3.37109e-13	9.80568e-12	chrIII	9059314	9060181	+	WBGene00029034	Cbr-gst-1	FALSE	TRUE	FALSE	-1.91
WBGene00001763	gst-15	199.728	1.12565	0.172456	6.52715	6.70321e-11	1.36508e-09	chrII	13611771	13613196	-	WBGene00039607	Cbr-gst-15	FALSE	TRUE	TRUE	-0.82
WBGene00001784	gst-36	3965.23	1.50859	0.129987	11.6057	3.85413e-31	4.88912e-29	chrX	9861646	9862960	-	WBGene00025077	Cbr-gst-36	FALSE	TRUE	FALSE	-1.78
WBGene00001788	gst-40	355.468	1.65923	0.235108	7.05729	1.69785e-12	4.46254e-11	chrIV	760610	762342	+	WBGene00032007	Cbr-gst-40	TRUE	TRUE	FALSE	-1.57
WBGene00001756	gst-8	117.408	3.48407	0.287227	12.13	7.32604e-34	1.0706e-31	chrII	4883749	4884602	+	NaN	NaN	FALSE	FALSE	FALSE	-1.55
WBGene00019144	H01M10.2	6.60332	1.22504	0.403939	3.03273	0.00242353	0.00912608	chrX	2584539	2585739	-	WBGene00025208	CBG02079	FALSE	FALSE	FALSE	-1.85
WBGene00044141	H03G16.6	4.06083	1.17437	0.386465	3.03875	0.0023756	0.00897706	chrX	15051688	15052870	+	NaN	NaN	FALSE	FALSE	FALSE	-1.74
WBGene00019150	H04J21.1	35.0781	1.24748	0.304601	4.09546	4.21334e-05	0.000271386	chrIII	2366884	2372655	-	WBGene00024128	CBG00796	FALSE	FALSE	FALSE	-0.46
WBGene00019174	H09G03.1	35.7782	1.26763	0.301542	4.20383	2.62441e-05	0.000178216	chrIII	3226352	3230652	+	NaN	NaN	FALSE	FALSE	FALSE	-1.37
WBGene00019184	H10E21.4	74.9621	1.13516	0.232179	4.88918	1.01256e-06	9.63815e-06	chrIII	17316	19675	-	WBGene00035521	CBG15199	FALSE	FALSE	FALSE	-0.62
WBGene00019202	H14N18.2	136.248	4.50816	0.268638	16.7815	3.33175e-63	1.06774e-60	chrV	8932618	8934265	+	WBGene00038404	CBG19134	FALSE	FALSE	TRUE	-2.06
WBGene00019216	H20J04.1	52.5327	3.70538	0.328781	11.2701	1.84414e-29	2.11867e-27	chrII	4355633	4358844	+	WBGene00024234	CBG00925	FALSE	FALSE	FALSE	-1.27
WBGene00019222	H20J04.7	7.44249	1.84614	0.404693	4.56182	5.07111e-06	4.09522e-05	chrII	4353221	4355317	-	NaN	NaN	FALSE	TRUE	FALSE	-1.42
WBGene00019236	H23N18.5	66.3659	2.11061	0.295616	7.1397	9.35348e-13	2.55779e-11	chrV	4911712	4912381	-	WBGene00030582	CBG08862	FALSE	FALSE	FALSE	-1.65
WBGene00044534	H23N18.6	70.8386	1.17047	0.236466	4.94985	7.42708e-07	7.28237e-06	chrV	4913061	4915079	-	WBGene00030583	CBG08864	FALSE	FALSE	FALSE	-2.01
WBGene00019248	H27M09.5	11.1183	2.00175	0.405113	4.94123	7.7632e-07	7.5875e-06	chrI	6845175	6846952	-	WBGene00026933	CBG04213	FALSE	FALSE	FALSE	-2.09
WBGene00019260	H34I24.1	11.4952	1.57488	0.40348	3.90323	9.49173e-05	0.000555011	chrIII	2847016	2848582	+	NaN	NaN	TRUE	TRUE	FALSE	0.51
WBGene00044201	H39E23.3	27.9756	2.09842	0.393708	5.32988	9.82759e-08	1.16345e-06	chrV	14107811	14110151	+	WBGene00030592	CBG08875	FALSE	FALSE	FALSE	-2.28
WBGene00010434	H40L08.3	140.147	1.3689	0.224454	6.09878	1.06884e-09	1.80281e-08	chrX	15069743	15076480	-	WBGene00029618	CBG07638	FALSE	TRUE	TRUE	-1.81
WBGene00019269	H41C03.2	78.0538	2.40728	0.247411	9.72989	2.24831e-22	1.6428e-20	chrII	5850362	5852038	-	WBGene00025563	CBG02522	FALSE	FALSE	FALSE	-2.33
WBGene00019270	H41C03.3	792.576	1.94665	0.137482	14.1594	1.63447e-45	3.55439e-43	chrII	5845777	5850308	+	WBGene00025562	CBG02521	FALSE	FALSE	FALSE	-2.49
WBGene00021214	hasp-2	35.4578	2.94429	0.350484	8.40063	4.44083e-17	2.02296e-15	chrI	682876	686599	-	WBGene00025031	Cbr-hasp-1	FALSE	FALSE	FALSE	-0.96
WBGene00001839	hdl-1	81.3467	4.57659	0.341605	13.3973	6.26941e-41	1.1568e-38	chrIV	11946106	11949817	-	WBGene00028506	Cbr-hdl-1	FALSE	FALSE	TRUE	-1.88
WBGene00006409	hdl-2	9.25021	1.49561	0.40414	3.70071	0.000214999	0.00113541	chrIV	8874129	8877022	+	WBGene00037453	Cbr-hdl-2	FALSE	FALSE	FALSE	-2.08
WBGene00001913	his-39	42.4423	1.6865	0.360706	4.67556	2.93156e-06	2.50823e-05	chrV	8536513	8536716	+	NaN	NaN	TRUE	FALSE	FALSE	-2.29
WBGene00001915	his-41	3289.94	1.24232	0.0848421	14.6428	1.49798e-48	3.60047e-46	chrV	9545494	9546264	+	NaN	NaN	FALSE	FALSE	FALSE	-2.08
WBGene00001916	his-42	45.379	2.1809	0.321397	6.78568	1.15543e-11	2.68527e-10	chrII	13828287	13828697	-	WBGene00024726	CBG01499	FALSE	FALSE	FALSE	-1.17
WBGene00001932	his-58	1657.28	1.54044	0.40176	3.83423	0.000125958	0.000707745	chrIV	11339630	11340132	-	NaN	NaN	FALSE	FALSE	FALSE	-2.14
WBGene00001944	his-70	4.15622	1.27752	0.381918	3.34501	0.000822798	0.00361995	chrIII	4059647	4060172	-	NaN	NaN	FALSE	FALSE	FALSE	-1.54
WBGene00001966	hlh-27	16.6467	2.85271	0.397874	7.1699	7.50517e-13	2.08671e-11	chrII	5539081	5540211	-	NaN	NaN	FALSE	TRUE	FALSE	-1.74
WBGene00001951	hlh-4	21.6022	1.30751	0.356436	3.66829	0.000244178	0.00127113	chrIII	9737469	9738839	-	WBGene00031498	Cbr-hlh-4	FALSE	FALSE	FALSE	-1.41
WBGene00012500	hpo-2	66.4579	2.90324	0.290499	9.99397	1.61967e-23	1.32083e-21	chrI	13066924	13069038	+	WBGene00029818	Cbr-hpo-2	TRUE	FALSE	FALSE	-1.07
WBGene00009195	hpo-33	8.63591	1.45463	0.405441	3.58776	0.000333536	0.00165203	chrV	17042592	17043783	+	NaN	NaN	FALSE	FALSE	FALSE	-1.63
WBGene00008627	hpx-2	12.2627	1.76093	0.395447	4.453	8.46793e-06	6.49931e-05	chrV	13850470	13853199	+	WBGene00032579	Cbr-hpx-2	FALSE	FALSE	FALSE	-2.54
WBGene00016250	hsp-110	84311.4	2.87412	0.126993	22.6322	2.09022e-113	1.52728e-110	chrIII	8443917	8446920	-	WBGene00037607	Cbr-hsp-110	FALSE	TRUE	TRUE	-1.88
WBGene00002012	hsp-12.3	118.149	3.31903	0.243067	13.6548	1.88969e-42	3.79329e-40	chrIV	9444791	9445507	-	WBGene00040365	Cbr-hsp-12.3	FALSE	FALSE	FALSE	-1.92
WBGene00002013	hsp-12.6	58.9258	3.72805	0.323455	11.5257	9.78835e-31	1.20003e-28	chrIV	9446385	9446884	-	WBGene00040366	Cbr-hsp-12.6	FALSE	TRUE	FALSE	-1.98
WBGene00002015	hsp-16.1	163662	5.23502	0.294569	17.7718	1.16929e-70	4.44989e-68	chrV	9087293	9087782	-	WBGene00038449	CBG19186	FALSE	TRUE	TRUE	-2.02
WBGene00002017	hsp-16.11	15211.9	5.6468	0.255981	22.0594	7.7582e-108	5.06139e-105	chrV	9090077	9090604	+	WBGene00038449	CBG19186	FALSE	TRUE	FALSE	-2.05
WBGene00002016	hsp-16.2	42211.4	4.99092	0.336888	14.8148	1.17584e-49	2.86387e-47	chrV	1804334	1804971	-	WBGene00038449	CBG19186	FALSE	TRUE	FALSE	-1.87
WBGene00002018	hsp-16.41	42643.8	5.35856	0.315388	16.9904	9.6749e-65	3.2728e-62	chrV	1805178	1805875	+	WBGene00027234	CBG04592	FALSE	TRUE	TRUE	-1.82
WBGene00002019	hsp-16.48	60234.2	5.11518	0.284672	17.9687	3.42813e-72	1.36291e-69	chrV	9088131	9088617	+	WBGene00027234	CBG04592	FALSE	TRUE	FALSE	-2.1
WBGene00002020	hsp-16.49	60235.8	5.1152	0.284674	17.9686	3.43208e-72	1.36291e-69	chrV	9089280	9089766	-	WBGene00027234	CBG04592	FALSE	TRUE	FALSE	-2.2
WBGene00002008	hsp-4	20902	2.18024	0.146107	14.9222	2.36302e-50	5.99518e-48	chrII	7350121	7352636	-	WBGene00033953	Cbr-hsp-4	FALSE	FALSE	TRUE	-1.57
WBGene00002026	hsp-70	49155.1	5.05899	0.340225	14.8695	5.19719e-50	1.30051e-47	chrI	9320325	9322534	-	WBGene00038690	CBG19481	FALSE	TRUE	TRUE	-2.21
WBGene00011299	ikke-1	4482.61	2.20056	0.0983579	22.373	7.21949e-111	5.07225e-108	chrIII	9046055	9050693	-	WBGene00029032	Cbr-ikke-1	FALSE	FALSE	FALSE	-1.89
WBGene00002096	ins-13	165.387	5.3806	0.324034	16.605	6.40866e-62	1.95112e-59	chrII	5544585	5544851	-	WBGene00270997	Cbr-ins-13	FALSE	FALSE	FALSE	-1.63
WBGene00002136	inx-14	193.043	1.06987	0.157535	6.79133	1.11105e-11	2.59533e-10	chrI	7350312	7352235	-	WBGene00032949	Cbr-inx-14	FALSE	FALSE	FALSE	-2.18
WBGene00015574	irg-1	159.718	1.47706	0.305149	4.84047	1.29532e-06	1.20477e-05	chrV	3523587	3524575	+	WBGene00028585	Cbr-irg-1	TRUE	TRUE	FALSE	-2.21
WBGene00016783	irg-2	41.9672	1.17683	0.29026	4.0544	5.0263e-05	0.000318472	chrV	4042404	4043599	+	NaN	NaN	FALSE	FALSE	FALSE	-1.58
WBGene00044529	irld-1	36.1899	1.96866	0.369852	5.32282	1.02169e-07	1.20485e-06	chrV	4336762	4338925	+	WBGene00040543	Cbr-irld-1	FALSE	FALSE	FALSE	-2.48
WBGene00011322	irld-14	21.234	3.02918	0.385213	7.86364	3.7313e-15	1.36867e-13	chrV	14996536	14998121	+	WBGene00032694	Cbr-irld-14	FALSE	FALSE	FALSE	-2.27
WBGene00013915	irld-20	9.13467	1.67267	0.405596	4.12398	3.72379e-05	0.000242958	chrIII	12751109	12753634	+	WBGene00024482	CBG01216	FALSE	FALSE	FALSE	-0.85
WBGene00008772	irld-4	4.48023	1.30512	0.383072	3.40699	0.000656842	0.00297646	chrIV	14633099	14634405	+	WBGene00040295	Cbr-irld-18	FALSE	FALSE	FALSE	-1.79
WBGene00011458	irld-47	6.91412	1.68403	0.402433	4.18462	2.85646e-05	0.000192684	chrII	7820333	7822554	-	WBGene00038794	CBG19609	FALSE	FALSE	FALSE	-1.46
WBGene00009239	irld-6	65.6307	1.10474	0.264854	4.17114	3.03079e-05	0.000202871	chrV	10754469	10756664	-	WBGene00031236	Cbr-irld-6	FALSE	FALSE	FALSE	-2.12
WBGene00014190	irld-62	6.85188	1.57657	0.403598	3.9063	9.37211e-05	0.000548719	chrV	15311080	15312536	+	WBGene00024408	Cbr-irld-30	FALSE	FALSE	FALSE	0.62
WBGene00022711	irld-63	13.7891	2.07645	0.39765	5.22181	1.77186e-07	1.99302e-06	chrII	2930728	2933463	+	WBGene00038794	CBG19609	FALSE	FALSE	FALSE	-1.39
WBGene00022714	irld-64	37.1113	3.7421	0.360006	10.3945	2.62547e-25	2.41002e-23	chrII	2928221	2930599	-	WBGene00087593	CBG26179	FALSE	TRUE	FALSE	-1.39
WBGene00005013	jmjd-1.1	6.87509	1.63567	0.404376	4.04493	5.23393e-05	0.00032957	chrII	11806567	11808805	+	WBGene00024918	Cbr-jmjd-1.2	FALSE	FALSE	FALSE	0.27
WBGene00019281	K01A2.6	7.99936	1.76538	0.403328	4.37704	1.20303e-05	8.88625e-05	chrII	299984	300767	+	NaN	NaN	FALSE	FALSE	FALSE	-0.66
WBGene00010457	K01C8.2	38.4382	1.46361	0.346265	4.22684	2.36993e-05	0.000162995	chrII	8267253	8269914	-	WBGene00024027	CBG00667	FALSE	FALSE	FALSE	-1.99
WBGene00010481	K01G5.10	337.875	1.20701	0.20585	5.86357	4.53031e-09	6.86865e-08	chrIII	10757641	10758522	-	NaN	NaN	FALSE	FALSE	FALSE	-0.28
WBGene00019348	K02H11.4	111.135	2.669	0.2915	9.15609	5.38132e-20	3.25498e-18	chrV	1528824	1531259	-	WBGene00270666	CBG30612	FALSE	FALSE	FALSE	-1.63
WBGene00010519	K03A11.1	4.57353	1.22258	0.395543	3.0909	0.00199548	0.00774904	chrX	13051796	13055395	+	NaN	NaN	FALSE	FALSE	FALSE	-1.17
WBGene00010531	K03D3.5	4.70676	1.32294	0.383855	3.44645	0.000567994	0.00262606	chrIV	16320139	16320506	-	NaN	NaN	FALSE	FALSE	FALSE	-1.74
WBGene00010578	K04H8.3	4.07403	1.18951	0.386867	3.07473	0.00210697	0.00811639	chrI	14255684	14256970	+	WBGene00038138	CBG18787	FALSE	FALSE	FALSE	-1.3
WBGene00010586	K05C4.10	27.8263	2.97134	0.366169	8.11465	4.87177e-16	1.97323e-14	chrI	14725296	14726131	+	NaN	NaN	FALSE	TRUE	FALSE	-1.71
WBGene00010580	K05C4.3	15.3324	2.14314	0.393489	5.44651	5.13685e-08	6.39202e-07	chrI	14748538	14753138	-	WBGene00042481	CBG24348	FALSE	FALSE	FALSE	-2.21
WBGene00010585	K05C4.9	585.627	2.78954	0.151231	18.4456	5.65355e-76	2.58183e-73	chrI	14726804	14730719	-	WBGene00042481	CBG24348	FALSE	FALSE	FALSE	-1.39
WBGene00019405	K05F1.1	18.1931	1.26376	0.374353	3.37586	0.000735865	0.003293	chrII	5801382	5803680	+	NaN	NaN	FALSE	FALSE	FALSE	-1.98
WBGene00019425	K06A1.2	17.3306	1.69372	0.372441	4.54763	5.42546e-06	4.34108e-05	chrII	6444010	6446134	+	WBGene00025677	CBG02665	FALSE	FALSE	FALSE	-1.9
WBGene00010592	K06A4.2	102.65	1.02569	0.243523	4.21188	2.53251e-05	0.000172746	chrV	9484206	9489033	+	WBGene00038530	CBG19283	FALSE	FALSE	FALSE	-2.27
WBGene00019430	K06A5.2	18.2471	2.03616	0.387958	5.24841	1.53419e-07	1.74937e-06	chrI	6468113	6469392	+	WBGene00033553	CBG12635	FALSE	FALSE	FALSE	-2.11
WBGene00019431	K06A5.3	7.00943	1.37714	0.405538	3.39584	0.000684173	0.00308587	chrI	6466752	6467515	+	WBGene00033552	CBG12634	FALSE	FALSE	FALSE	-2.12
WBGene00019442	K06C4.1	15.6014	1.9463	0.390828	4.97993	6.36068e-07	6.34574e-06	chrV	8888298	8888930	-	WBGene00024094	CBG00753	FALSE	FALSE	FALSE	NA
WBGene00019461	K07A3.3	12.5121	1.45234	0.393249	3.69319	0.000221456	0.00116346	chrI	2599979	2602627	+	WBGene00026894	CBG04167	FALSE	FALSE	FALSE	-1.13
WBGene00019483	K07D4.2	3.99667	1.23464	0.379295	3.2551	0.00113352	0.00477099	chrII	4044771	4047247	-	NaN	NaN	FALSE	TRUE	FALSE	-1.86
WBGene00019501	K07E12.2	5.16761	1.20387	0.399062	3.01676	0.00255492	0.0095539	chrIII	6737271	6737783	+	WBGene00087345	CBG25931	FALSE	FALSE	FALSE	-1.34
WBGene00010654	K08C9.7	22.0933	1.32679	0.380457	3.48734	0.000487843	0.00229617	chrI	11495521	11496245	-	NaN	NaN	FALSE	FALSE	FALSE	-1.96
WBGene00019533	K08D10.10	12.1243	1.69657	0.404464	4.1946	2.73352e-05	0.000185144	chrIV	4154040	4154774	+	NaN	NaN	FALSE	FALSE	FALSE	-2.73
WBGene00195048	K08D10.13	7.12848	1.36043	0.405395	3.35582	0.000791303	0.00350248	chrIV	4170776	4171569	-	NaN	NaN	FALSE	FALSE	FALSE	-1.54
WBGene00010658	K08D8.4	360.448	1.51289	0.191149	7.91472	2.47806e-15	9.27598e-14	chrIV	12907469	12909998	-	WBGene00028693	CBG06414	FALSE	FALSE	FALSE	-1.92
WBGene00010679	K08F4.5	7.33474	1.57707	0.402507	3.91813	8.92376e-05	0.000525501	chrIV	10134932	10135887	-	NaN	NaN	FALSE	TRUE	FALSE	-1.99
WBGene00010682	K08F8.5	21.8706	1.95686	0.368119	5.31583	1.0617e-07	1.24962e-06	chrII	8767185	8769307	+	WBGene00026085	CBG03167	FALSE	FALSE	FALSE	-1.71
WBGene00010712	K09B11.5	37.8102	2.20555	0.310118	7.11198	1.14392e-12	3.09114e-11	chrIV	13431288	13434068	-	WBGene00037630	CBG18159	FALSE	TRUE	TRUE	-1.93
WBGene00019545	K09B3.1	25.5988	1.62737	0.338755	4.80399	1.55538e-06	1.41495e-05	chrIV	3794767	3796267	+	WBGene00030105	CBG08286	FALSE	FALSE	FALSE	-1.48
WBGene00019556	K09C6.2	101.804	1.26678	0.269892	4.69365	2.68367e-06	2.31676e-05	chrV	856849	862061	+	WBGene00037556	CBG18064	FALSE	TRUE	FALSE	-1.99
WBGene00019564	K09D9.1	198.466	3.16221	0.260354	12.1458	6.03885e-34	9.04194e-32	chrV	4025091	4026212	+	WBGene00024644	CBG01397	FALSE	FALSE	TRUE	-2.16
WBGene00019570	K09E2.1	13.2099	1.74991	0.38782	4.51216	6.41701e-06	5.04822e-05	chrX	8681910	8686146	+	WBGene00035696	CBG15420	FALSE	FALSE	FALSE	-1.86
WBGene00019578	K09E3.7	47.4113	3.54087	0.345882	10.2372	1.3506e-24	1.17483e-22	chrX	17131348	17134527	-	WBGene00036054	Cbr-cnp-3	FALSE	FALSE	TRUE	-1.88
WBGene00019586	K09F6.3	93.4088	3.17566	0.245262	12.9481	2.40936e-38	4.11325e-36	chrII	2255172	2261142	+	NaN	NaN	FALSE	FALSE	FALSE	-0.14
WBGene00019625	K10C9.4	13.1452	1.77264	0.391042	4.53313	5.8116e-06	4.60966e-05	chrV	1050126	1053014	-	WBGene00037392	CBG17879	FALSE	FALSE	FALSE	0.25
WBGene00019641	K10G6.4	36.5627	1.60217	0.300192	5.33714	9.44221e-08	1.12512e-06	chrII	3972820	3974968	-	WBGene00037866	CBG18445	FALSE	FALSE	TRUE	-1.73
WBGene00019642	K11C4.1	105.823	3.56284	0.278885	12.7753	2.25281e-37	3.7411e-35	chrV	6896999	6898497	+	WBGene00030913	CBG09309	FALSE	FALSE	TRUE	-1.93
WBGene00019659	K11H12.3	24.2631	2.40021	0.360077	6.66582	2.63195e-11	5.78553e-10	chrIV	671634	673480	-	WBGene00030574	CBG08853	FALSE	FALSE	FALSE	-0.97
WBGene00019660	K11H12.4	713.985	1.51525	0.199587	7.5919	3.15251e-14	1.02651e-12	chrIV	674036	675883	-	WBGene00030574	CBG08853	FALSE	FALSE	FALSE	-0.95
WBGene00019669	K12B6.4	109.974	1.15604	0.244677	4.72479	2.30357e-06	2.00952e-05	chrV	6280380	6281136	-	WBGene00038212	CBG18902	FALSE	TRUE	FALSE	-1.81
WBGene00044896	K12C11.5	5.13045	1.49277	0.392257	3.80559	0.000141468	0.00078428	chrI	1332698	1334074	+	WBGene00042746	CBG24697	FALSE	FALSE	FALSE	-2.24
WBGene00002188	kgb-2	57.1781	1.05892	0.280838	3.77059	0.000162864	0.000890198	chrIV	3606784	3609229	+	WBGene00034290	Cbr-kgb-1	FALSE	FALSE	FALSE	-1.42
WBGene00019815	kin-34	15.9835	2.58941	0.403116	6.42348	1.33195e-10	2.58289e-09	chrV	244469	245846	-	WBGene00023549	CBG00041	FALSE	TRUE	FALSE	-2.45
WBGene00002194	kin-6	39.9088	3.13657	0.3846	8.15542	3.47979e-16	1.45126e-14	chrII	11640454	11641778	+	WBGene00026632	CBG03859	FALSE	FALSE	FALSE	-1.74
WBGene00002214	klc-1	605.861	1.33144	0.109374	12.1733	4.31343e-34	6.51185e-32	chrIV	11083735	11086050	+	WBGene00031018	Cbr-klc-1	FALSE	TRUE	FALSE	-2.23
WBGene00009998	klf-2	10.212	1.24804	0.400217	3.1184	0.00181838	0.0071479	chrV	20685683	20688770	+	WBGene00028034	Cbr-klf-2	FALSE	TRUE	FALSE	-1.97
WBGene00018725	kreg-1	284.655	3.57385	0.361239	9.89331	4.45059e-23	3.38746e-21	chrX	8709764	8710137	+	WBGene00035685	CBG15407	FALSE	FALSE	FALSE	-1.79
WBGene00010877	lact-4	1785.97	1.92257	0.178181	10.79	3.83914e-27	3.91785e-25	chrII	8478010	8480478	-	WBGene00023987	Cbr-lact-4	FALSE	FALSE	TRUE	-0.74
WBGene00008047	lact-7	39.2145	1.04339	0.284419	3.66851	0.000243969	0.00127041	chrX	11759198	11764535	+	WBGene00023689	Cbr-lact-7	FALSE	FALSE	FALSE	-1.29
WBGene00002270	lec-7	113	1.37902	0.288057	4.78731	1.69035e-06	1.52257e-05	chrX	9852139	9852909	+	WBGene00025074	Cbr-lec-7	FALSE	FALSE	FALSE	-1.58
WBGene00007903	lgc-21	64.4974	1.0689	0.261735	4.08389	4.42871e-05	0.000284456	chrX	14064313	14067984	-	WBGene00029397	Cbr-lgc-21	FALSE	FALSE	TRUE	-1.5
WBGene00009155	lhfp-4	125.824	3.04976	0.253841	12.0145	2.98271e-33	4.29018e-31	chrIV	17275581	17276864	+	WBGene00023840	Cbr-lhfp-4	FALSE	FALSE	TRUE	0.67
WBGene00003001	lin-12	2351.6	2.13391	0.128118	16.6558	2.74497e-62	8.4987e-60	chrIII	9060096	9071760	-	WBGene00029037	CBG06829	FALSE	FALSE	FALSE	-1.95
WBGene00002992	lin-3	448.039	1.11967	0.14642	7.64699	2.05735e-14	6.9084e-13	chrIV	11054308	11063613	+	WBGene00028342	Cbr-lin-3	FALSE	FALSE	FALSE	-2.25
WBGene00010267	lips-9	32.3878	1.52767	0.33001	4.62917	3.6714e-06	3.06375e-05	chrII	12933854	12935362	-	WBGene00025751	Cbr-lips-9	FALSE	TRUE	FALSE	-1.83
WBGene00018700	lmd-3	4732.35	1.22701	0.142147	8.63198	6.02988e-18	3.07675e-16	chrV	8415687	8444773	-	WBGene00032404	Cbr-lmd-3	FALSE	FALSE	FALSE	-2.23
WBGene00003092	lys-3	30.3	1.299	0.319251	4.06889	4.7237e-05	0.000302022	chrV	10282204	10283544	-	WBGene00031135	Cbr-lys-3	FALSE	FALSE	FALSE	-1.93
WBGene00010825	M01G12.14	48.8748	2.09363	0.295772	7.07853	1.45692e-12	3.85145e-11	chrI	12106912	12108503	-	WBGene00026907	CBG04180	FALSE	TRUE	FALSE	-0.89
WBGene00010822	M01G12.9	340.46	1.10507	0.154294	7.16212	7.94407e-13	2.1987e-11	chrI	12109096	12112505	-	WBGene00026907	CBG04180	FALSE	FALSE	FALSE	-1.17
WBGene00271788	M01H9.10	29.7482	1.10571	0.312433	3.53904	0.000401586	0.00194068	chrIV	4479669	4480072	-	WBGene00271166	CBG30357	FALSE	FALSE	FALSE	-1.91
WBGene00019718	M01H9.2	45.9613	1.95092	0.286024	6.82084	9.0508e-12	2.14716e-10	chrIV	4460179	4462061	-	WBGene00024885	CBG01687	TRUE	FALSE	FALSE	-1.7
WBGene00019721	M01H9.5	24.1021	2.31258	0.361942	6.38937	1.66569e-10	3.17281e-09	chrIV	4465484	4468509	+	WBGene00024884	CBG01685	TRUE	FALSE	FALSE	-1.76
WBGene00019735	M02F4.1	13.2233	1.34139	0.400611	3.34836	0.00081291	0.00358336	chrX	3027253	3030762	-	NaN	NaN	FALSE	FALSE	FALSE	-1.82
WBGene00014807	M04D5.1	4.46158	1.32105	0.384155	3.43885	0.000584183	0.00269137	chrI	11334223	11337431	+	NaN	NaN	FALSE	FALSE	FALSE	-1.57
WBGene00010869	M05B5.1	30.1806	1.253	0.309519	4.04822	5.16084e-05	0.000325529	chrI	7177953	7179430	-	WBGene00041946	CBG23640	FALSE	FALSE	FALSE	-2.3
WBGene00010871	M05B5.3	70.5202	1.53508	0.242251	6.33673	2.34689e-10	4.37456e-09	chrI	7185695	7188298	+	WBGene00040603	CBG21935	FALSE	FALSE	FALSE	-2.15
WBGene00010874	M05D6.1	210.808	4.65973	0.294081	15.8451	1.52087e-56	4.20937e-54	chrII	8473819	8475568	-	WBGene00038892	CBG19720	FALSE	TRUE	FALSE	-0.79
WBGene00010876	M05D6.3	700.802	5.05623	0.230788	21.9086	2.15164e-106	1.35531e-103	chrII	8475772	8477943	+	WBGene00036518	CBG16631	FALSE	FALSE	FALSE	-0.98
WBGene00010880	M05D6.8	35.1809	2.25475	0.316236	7.12995	1.00408e-12	2.73347e-11	chrII	8470079	8471217	-	WBGene00023993	CBG00624	FALSE	FALSE	FALSE	-1.26
WBGene00010915	M110.7	17.8941	2.51583	0.391756	6.42193	1.34558e-10	2.60654e-09	chrII	8232789	8237202	+	WBGene00024017	CBG00653	FALSE	FALSE	FALSE	-1.69
WBGene00010920	M117.4	19.0897	1.6473	0.392691	4.1949	2.72997e-05	0.000184972	chrIV	11830799	11833556	-	WBGene00026643	CBG03873	FALSE	FALSE	FALSE	-2.12
WBGene00010946	M176.10	10.3524	1.71367	0.404909	4.23224	2.31371e-05	0.000159549	chrII	9423331	9426173	-	WBGene00034166	CBG13392	FALSE	TRUE	FALSE	-1.4
WBGene00014813	M176.9	14.1283	1.30359	0.383979	3.39494	0.000686429	0.00309502	chrII	9409341	9411597	-	NaN	NaN	FALSE	FALSE	FALSE	-1.51
WBGene00010900	M28.9	6.50581	1.47307	0.404337	3.64317	0.000269303	0.00137643	chrII	10639410	10643536	+	WBGene00025987	CBG03046	FALSE	FALSE	FALSE	-1.87
WBGene00019782	M60.7	21.9057	1.22281	0.349953	3.49421	0.000475459	0.00224521	chrX	8258149	8261175	-	WBGene00041219	CBG22724	FALSE	TRUE	TRUE	-1.84
WBGene00019783	M70.1	6.78678	1.70193	0.398528	4.27056	1.94985e-05	0.000136624	chrIV	2245874	2252370	+	NaN	NaN	TRUE	TRUE	FALSE	-1.05
WBGene00019784	M70.2	4.42745	1.21226	0.386775	3.13428	0.00172275	0.00682932	chrIV	2243060	2243699	+	WBGene00041710	CBG23337	FALSE	FALSE	FALSE	-1.37
WBGene00003100	mab-3	30.5274	1.18401	0.322143	3.67543	0.000237446	0.00124033	chrII	9732137	9738035	+	WBGene00024335	Cbr-mab-3.1	FALSE	TRUE	FALSE	-1.81
WBGene00021193	math-44	19.8847	1.68608	0.361241	4.66748	3.04917e-06	2.59912e-05	chrII	1987285	1990667	+	NaN	NaN	TRUE	FALSE	FALSE	-1.73
WBGene00015837	math-8	65.8491	2.95634	0.309689	9.54613	1.34631e-21	9.24551e-20	chrII	1887209	1889171	-	NaN	NaN	FALSE	FALSE	FALSE	-2.02
WBGene00003160	mdf-1	2386.01	1.1319	0.160261	7.06286	1.63112e-12	4.29332e-11	chrV	9541782	9544226	-	WBGene00038548	Cbr-mdf-1	FALSE	FALSE	FALSE	-2.1
WBGene00016115	mdt-26	3340.1	1.87389	0.166887	11.2285	2.95587e-29	3.33302e-27	chrII	5661167	5665243	+	WBGene00025516	CBG02468	FALSE	FALSE	FALSE	-1.73
WBGene00010493	meg-2	52.4333	3.1819	0.342543	9.28908	1.55634e-20	9.94042e-19	chrX	13922663	13926129	-	NaN	NaN	FALSE	FALSE	FALSE	-1.57
WBGene00003184	mei-2	131.339	1.82617	0.184361	9.9054	3.94396e-23	3.03984e-21	chrI	6564749	6565868	-	WBGene00033591	Cbr-mei-2	FALSE	FALSE	FALSE	-2.39
WBGene00010353	memi-3	50.5682	1.08762	0.287966	3.7769	0.000158794	0.000870818	chrIV	11401884	11403338	-	WBGene00027716	CBG05203	FALSE	FALSE	FALSE	-2.3
WBGene00003228	mex-1	77.794	1.84862	0.283165	6.52841	6.64703e-11	1.35515e-09	chrII	11968637	11972334	+	WBGene00039763	Cbr-mex-1	FALSE	FALSE	FALSE	-1.24
WBGene00003252	mig-21	81.7979	1.07444	0.220231	4.8787	1.06788e-06	1.0123e-05	chrIII	5877020	5878419	-	WBGene00030726	Cbr-mig-21	FALSE	FALSE	TRUE	-1.84
WBGene00021450	mltn-6	14.896	1.93073	0.394713	4.89149	1.00076e-06	9.54614e-06	chrV	364950	369088	+	WBGene00024625	Cbr-mltn-6	FALSE	TRUE	TRUE	-2.52
WBGene00017559	mpz-3	9.73512	2.03677	0.405348	5.02474	5.04109e-07	5.19964e-06	chrII	6563796	6565154	-	WBGene00025699	CBG02690	FALSE	FALSE	FALSE	-1.91
WBGene00011241	mpz-5	21.1974	1.15408	0.349763	3.2996	0.000968231	0.00417631	chrIV	10372638	10373821	-	WBGene00042751	Cbr-mpz-5	FALSE	FALSE	FALSE	-2.11
WBGene00020037	mrps-6	2153.57	1.09123	0.153508	7.10865	1.1718e-12	3.14784e-11	chrI	4173743	4174774	-	WBGene00033093	Cbr-mrps-6	FALSE	FALSE	FALSE	-1.92
WBGene00016447	msd-4	14.0479	2.45164	0.401639	6.10409	1.03386e-09	1.74866e-08	chrIII	4868333	4868769	-	WBGene00036490	Cbr-msd-4	FALSE	FALSE	FALSE	-1.52
WBGene00003434	msp-38	11.9856	1.4445	0.396554	3.64262	0.000269875	0.00137889	chrIV	10143312	10143775	-	NaN	NaN	FALSE	FALSE	FALSE	-1.97
WBGene00003442	msp-49	5.18599	1.42213	0.396382	3.58778	0.000333505	0.00165203	chrII	5194332	5194792	+	NaN	NaN	FALSE	FALSE	FALSE	-1.33
WBGene00003443	msp-50	9.90989	1.73984	0.401743	4.33074	1.48607e-05	0.000107637	chrII	5199763	5200223	+	NaN	NaN	FALSE	TRUE	FALSE	-1.48
WBGene00003450	msp-57	12.1594	2.51733	0.404749	6.2195	4.98757e-10	8.85403e-09	chrIV	5062534	5062995	+	NaN	NaN	FALSE	FALSE	FALSE	-1.76
WBGene00003457	msp-64	5.24413	1.35618	0.399251	3.39681	0.000681759	0.00307574	chrII	5809917	5810342	-	NaN	NaN	FALSE	FALSE	FALSE	-2.15
WBGene00003458	msp-65	13.665	1.82889	0.405361	4.51176	6.42909e-06	5.05336e-05	chrIV	5316487	5316944	+	NaN	NaN	FALSE	FALSE	FALSE	-2.07
WBGene00017978	msrp-1	9.90132	2.16781	0.405483	5.34624	8.98017e-08	1.07427e-06	chrI	2692074	2692467	+	NaN	NaN	FALSE	FALSE	FALSE	-1.27
WBGene00003518	nac-2	479.605	1.74584	0.139198	12.5421	4.39215e-36	7.10013e-34	chrIII	9038779	9043300	-	WBGene00029030	Cbr-nac-2	FALSE	TRUE	FALSE	-1.26
WBGene00003533	nas-14	21.0391	1.53473	0.359959	4.26363	2.01134e-05	0.000140394	chrIV	13170544	13173694	+	WBGene00025001	Cbr-nas-14	FALSE	FALSE	FALSE	-1.93
WBGene00003535	nas-16	4.44293	1.28677	0.382104	3.36758	0.000758316	0.00337775	chrV	11392320	11393508	+	NaN	NaN	FALSE	FALSE	FALSE	-2.15
WBGene00003543	nas-24	14.8686	1.84649	0.393446	4.69312	2.69073e-06	2.32045e-05	chrV	13769669	13771279	+	WBGene00036020	Cbr-nas-24	FALSE	FALSE	FALSE	-2.07
WBGene00003548	nas-30	147.86	1.29789	0.229784	5.64829	1.62048e-08	2.22399e-07	chrI	943664	947710	+	WBGene00027651	Cbr-nas-30	FALSE	FALSE	TRUE	-1.67
WBGene00003552	nas-36	149.754	1.31665	0.176348	7.46619	8.25493e-14	2.58207e-12	chrI	7527224	7531715	+	WBGene00032925	Cbr-nas-36	FALSE	FALSE	FALSE	-2.16
WBGene00003554	nas-38	194.3	1.15829	0.208102	5.56597	2.60703e-08	3.43845e-07	chrX	558141	563657	+	WBGene00030003	Cbr-nas-38	FALSE	FALSE	FALSE	-2.14
WBGene00003562	ncr-2	67.6822	1.28472	0.274014	4.68853	2.75172e-06	2.36433e-05	chrIII	8258345	8265805	+	WBGene00036534	Cbr-ncr-2	FALSE	FALSE	FALSE	-1.96
WBGene00018196	nep-13	15.2245	2.54017	0.396741	6.40259	1.52767e-10	2.92823e-09	chrII	3282653	3287158	+	NaN	NaN	FALSE	FALSE	FALSE	-1.91
WBGene00013785	nep-23	5.37959	1.28956	0.397164	3.24693	0.00116658	0.00488871	chrIV	16920341	16924071	+	NaN	NaN	FALSE	FALSE	FALSE	-1.83
WBGene00022874	nep-25	8.93886	1.52833	0.402803	3.79425	0.00014809	0.000816531	chrII	5842243	5844575	+	NaN	NaN	FALSE	FALSE	FALSE	-2.44
WBGene00017393	nep-5	6.73164	1.34707	0.403961	3.33464	0.000854098	0.00373964	chrII	5488151	5490606	+	WBGene00025470	Cbr-nep-5	FALSE	TRUE	FALSE	-1.87
WBGene00017550	nep-6	8.31776	1.21911	0.40557	3.00593	0.00264772	0.00985852	chrII	3416838	3420671	+	NaN	NaN	FALSE	FALSE	FALSE	-1.09
WBGene00003589	nex-2	3912.57	1.01883	0.175506	5.80509	6.43316e-09	9.43891e-08	chrIII	10325613	10330422	-	WBGene00042679	Cbr-nex-2	FALSE	TRUE	TRUE	-1.47
WBGene00003702	nhr-112	217.954	1.42136	0.210307	6.75851	1.39413e-11	3.17935e-10	chrV	16722061	16723844	-	WBGene00036844	CBG17088	TRUE	FALSE	FALSE	-2.25
WBGene00003708	nhr-118	4.13681	1.20327	0.376632	3.19483	0.00139913	0.00571767	chrV	4407819	4410280	+	NaN	NaN	TRUE	FALSE	FALSE	-2.4
WBGene00003713	nhr-123	83.0346	1.38613	0.22116	6.26752	3.66838e-10	6.63469e-09	chrV	451451	453746	+	WBGene00024608	CBG01355	FALSE	FALSE	FALSE	0.29
WBGene00010180	nhr-192	11.5973	2.02093	0.403224	5.01193	5.38874e-07	5.49922e-06	chrV	10069369	10070641	-	WBGene00031683	Cbr-nhr-192	FALSE	FALSE	FALSE	-2.27
WBGene00003601	nhr-2	48.9018	4.03642	0.347737	11.6077	3.76654e-31	4.81142e-29	chrI	5818477	5821134	-	WBGene00026806	Cbr-nhr-2	FALSE	TRUE	TRUE	-2.03
WBGene00013483	nhr-241	234.84	5.66579	0.302448	18.7331	2.66173e-78	1.24671e-75	chrV	18699451	18700992	+	WBGene00039651	Cbr-nhr-241.1	TRUE	TRUE	FALSE	-2.26
WBGene00014192	nhr-246	85.3335	3.11323	0.316422	9.83886	7.657e-23	5.77977e-21	chrV	15316497	15318425	+	WBGene00027802	CBG05337	FALSE	FALSE	FALSE	0.11
WBGene00014193	nhr-247	140.906	4.67731	0.32701	14.3033	2.08783e-46	4.70844e-44	chrV	15323853	15325351	+	NaN	NaN	TRUE	FALSE	FALSE	-0.73
WBGene00022726	nhr-249	4.88211	1.30735	0.382801	3.41522	0.000637313	0.00290204	chrIV	6971898	6972527	-	NaN	NaN	FALSE	FALSE	FALSE	-2.26
WBGene00014068	nhr-255	7.19812	1.31313	0.405564	3.2378	0.00120457	0.00502526	chrX	15742610	15744298	+	NaN	NaN	FALSE	FALSE	FALSE	-1.16
WBGene00011568	nhr-26	15.6878	1.94842	0.388681	5.01291	5.36121e-07	5.47419e-06	chrX	12695589	12699921	-	WBGene00030086	Cbr-nhr-26	FALSE	FALSE	TRUE	-0.82
WBGene00013512	nhr-276	16.1197	2.83827	0.397766	7.13552	9.6423e-13	2.63282e-11	chrI	14041627	14043478	+	WBGene00024450	CBG01180	FALSE	FALSE	FALSE	-1.88
WBGene00018412	nhr-37	60.5438	1.97025	0.271857	7.2474	4.2486e-13	1.21645e-11	chrV	6622268	6624694	+	WBGene00038271	Cbr-nhr-37	FALSE	FALSE	FALSE	-1.9
WBGene00003763	nlp-25	29.2739	1.21346	0.353626	3.43149	0.00060028	0.0027551	chrV	19607511	19608346	+	NaN	NaN	FALSE	FALSE	FALSE	-1.15
WBGene00003771	nlp-33	2286.89	1.135	0.148644	7.63571	2.24575e-14	7.47232e-13	chrV	11147336	11147737	+	NaN	NaN	FALSE	FALSE	FALSE	-2.32
WBGene00003742	nlp-4	21.5437	1.78826	0.365143	4.89743	9.70991e-07	9.30593e-06	chrI	10517324	10518055	-	WBGene00025311	Cbr-nlp-4	FALSE	FALSE	FALSE	-2.32
WBGene00012295	nmat-1	231.33	2.7336	0.202142	13.5232	1.14161e-41	2.21849e-39	chrX	12014250	12016190	-	WBGene00036217	Cbr-nmat-1	FALSE	FALSE	FALSE	-0.96
WBGene00017305	nspb-12	42.1217	1.17858	0.349517	3.37204	0.000746135	0.00333162	chrIII	5568213	5568779	-	NaN	NaN	FALSE	FALSE	FALSE	-1.63
WBGene00022754	nspd-1	6.60038	1.59267	0.403876	3.94347	8.03105e-05	0.000480049	chrI	6097494	6097837	-	NaN	NaN	FALSE	FALSE	FALSE	-2.3
WBGene00020860	nspd-10	8.5284	1.59454	0.405207	3.93513	8.31515e-05	0.000493479	chrI	10878047	10878378	-	NaN	NaN	FALSE	FALSE	FALSE	-2.14
WBGene00012591	nspe-1	853.936	2.60865	0.1702	15.327	5.05144e-53	1.31821e-50	chrII	12620548	12620888	-	WBGene00031729	CBG10321	FALSE	FALSE	TRUE	-0.61
WBGene00012604	nspe-2	59.7164	2.05312	0.309465	6.63442	3.25785e-11	7.00132e-10	chrII	12619079	12619408	-	WBGene00031729	CBG10321	FALSE	FALSE	FALSE	-0.89
WBGene00012594	nspe-5	81.6511	2.80034	0.296084	9.45791	3.14145e-21	2.12522e-19	chrII	12628936	12629380	+	WBGene00031726	CBG10317	FALSE	FALSE	FALSE	-0.21
WBGene00012593	nspe-7	26.6119	1.89769	0.349613	5.42796	5.70007e-08	7.05442e-07	chrII	12627187	12627570	+	WBGene00031726	CBG10317	FALSE	FALSE	FALSE	-0.51
WBGene00175028	nspe-8	4.15131	1.17968	0.375096	3.145	0.00166085	0.00661695	chrII	12621088	12621958	-	NaN	NaN	FALSE	FALSE	FALSE	-0.56
WBGene00011230	nud-2	3141.2	1.99108	0.166946	11.9265	8.60739e-33	1.21885e-30	chrI	7857823	7859417	-	WBGene00042008	Cbr-nud-2	FALSE	FALSE	TRUE	-1.86
WBGene00017270	numr-1	112.971	1.17215	0.213881	5.48037	4.24446e-08	5.38427e-07	chrIII	7362619	7363464	-	WBGene00042194	Cbr-numr-1	FALSE	FALSE	FALSE	-1.33
WBGene00017267	numr-2	112.971	1.17215	0.213881	5.48037	4.24446e-08	5.38427e-07	chrIII	7364385	7365230	+	WBGene00042194	Cbr-numr-1	FALSE	FALSE	FALSE	-1.27
WBGene00009180	nurf-1	71756.4	4.07862	0.084571	48.2272	0	0	chrII	14390718	14407905	+	WBGene00032278	Cbr-nurf-1	FALSE	FALSE	FALSE	-1.54
WBGene00017061	oac-12	52.7738	3.82574	0.335418	11.4059	3.90748e-30	4.60503e-28	chrV	4329039	4332550	-	NaN	NaN	FALSE	FALSE	FALSE	-2.47
WBGene00008602	oac-14	2219.4	1.27036	0.297105	4.27579	1.90458e-05	0.000133966	chrX	10139374	10142013	-	WBGene00025146	Cbr-oac-14	FALSE	FALSE	TRUE	-1.32
WBGene00018211	oac-24	13.96	1.61868	0.391122	4.13856	3.49491e-05	0.000229977	chrV	4710764	4714911	+	WBGene00038427	Cbr-oac-41	FALSE	FALSE	FALSE	-2.13
WBGene00007361	oac-3	23.8412	1.78746	0.359733	4.96885	6.73498e-07	6.67541e-06	chrV	13899513	13902653	+	WBGene00032558	Cbr-oac-3	FALSE	FALSE	FALSE	-2.52
WBGene00006419	oac-39	6.82017	1.59542	0.394591	4.04323	5.27197e-05	0.000331622	chrV	246618	251756	-	WBGene00024360	Cbr-oac-55	FALSE	TRUE	TRUE	-2.42
WBGene00015873	oac-4	6.60984	1.68218	0.402404	4.18032	2.911e-05	0.000195713	chrII	3833250	3836015	-	NaN	NaN	FALSE	FALSE	FALSE	2.25
WBGene00020864	oac-50	83.4698	3.85958	0.285968	13.4965	1.63905e-41	3.1188e-39	chrV	9069865	9073528	-	WBGene00088593	Cbr-oac-50	FALSE	FALSE	FALSE	-2.31
WBGene00021479	oac-55	13.2632	1.16285	0.381376	3.0491	0.00229531	0.0087278	chrV	3761139	3766306	+	WBGene00024360	Cbr-oac-55	TRUE	FALSE	FALSE	-2.35
WBGene00019579	oac-57	57.0273	1.01702	0.269642	3.77174	0.000162111	0.000886878	chrIV	12304462	12307820	-	WBGene00028578	CBG06276	FALSE	FALSE	FALSE	-2.06
WBGene00007833	oac-6	287.476	1.54472	0.356817	4.32917	1.4967e-05	0.000108192	chrV	16302717	16306156	+	WBGene00042523	Cbr-oac-6	FALSE	FALSE	FALSE	-1.5
WBGene00016753	oac-9	24.0591	2.54384	0.394954	6.44085	1.18808e-10	2.33363e-09	chrI	6265691	6269073	-	WBGene00033508	Cbr-oac-9	FALSE	FALSE	FALSE	-2.04
WBGene00003844	odc-1	3268.36	1.79588	0.110638	16.232	2.99565e-59	8.82605e-57	chrV	6898540	6900223	-	WBGene00038323	Cbr-odc-1	FALSE	FALSE	FALSE	-1.94
WBGene00003879	ora-1	38.9903	1.51531	0.314718	4.81481	1.4734e-06	1.34843e-05	chrIV	7977836	7979014	+	WBGene00037284	Cbr-ora-1	FALSE	FALSE	FALSE	-2.11
WBGene00011557	ostf-4	33.5181	3.30531	0.360235	9.17542	4.49832e-20	2.74819e-18	chrIII	10299164	10299949	-	NaN	NaN	FALSE	TRUE	FALSE	-1.52
WBGene00018477	otpl-4	56.1823	3.54698	0.337274	10.5166	7.24366e-26	7.00105e-24	chrV	8537331	8539614	+	WBGene00024724	Cbr-otpl-4	TRUE	FALSE	FALSE	-2.29
WBGene00018478	otpl-5	29.7335	1.3039	0.35113	3.71344	0.000204465	0.00108581	chrV	8529519	8532465	+	WBGene00024734	Cbr-otpl-5	FALSE	FALSE	FALSE	-2.28
WBGene00018480	otpl-7	36.3969	1.2156	0.312623	3.88838	0.000100914	0.000585206	chrV	8521503	8524555	+	WBGene00024736	Cbr-otpl-7	FALSE	FALSE	TRUE	-2.18
WBGene00012505	pals-13	21.9293	1.4652	0.348949	4.19889	2.68221e-05	0.000181938	chrI	13083321	13085505	-	WBGene00028845	CBG06596	FALSE	TRUE	FALSE	-2.12
WBGene00022337	pals-16	77.5977	1.12312	0.23274	4.82564	1.39552e-06	1.28747e-05	chrIII	1399972	1401305	+	WBGene00041839	CBG23489	FALSE	FALSE	TRUE	-0.66
WBGene00007656	pals-2	6.00576	1.59135	0.400723	3.9712	7.15119e-05	0.00043198	chrI	13104253	13106298	+	NaN	NaN	FALSE	TRUE	FALSE	-1.67
WBGene00194746	pals-20	40.1282	2.40533	0.33105	7.26575	3.7097e-13	1.069e-11	chrIII	1386993	1388497	-	WBGene00041839	CBG23489	FALSE	FALSE	FALSE	-0.8
WBGene00016219	pals-24	282.681	1.10037	0.189991	5.79173	6.9665e-09	1.01806e-07	chrIII	120492	124641	+	NaN	NaN	FALSE	FALSE	FALSE	-0.43
WBGene00138721	pals-37	67.9224	1.62361	0.274645	5.91166	3.38677e-09	5.26521e-08	chrV	12437499	12441266	-	WBGene00041840	CBG23490	FALSE	FALSE	TRUE	-1
WBGene00008302	pals-38	20.476	1.71302	0.369171	4.64017	3.48121e-06	2.92508e-05	chrV	12445184	12446956	-	WBGene00041843	Cbr-pals-38	FALSE	FALSE	FALSE	-1.09
WBGene00008301	pals-39	38.2126	1.02126	0.319862	3.19282	0.00140891	0.0057512	chrV	12441806	12443835	-	WBGene00041841	CBG23491	FALSE	TRUE	FALSE	-0.96
WBGene00004052	parg-2	35.2991	1.43298	0.349578	4.09919	4.14605e-05	0.000267618	chrIV	8712635	8715027	-	WBGene00036378	Cbr-parg-2	FALSE	FALSE	FALSE	-2.04
WBGene00003987	pes-23	8.09792	1.31738	0.405373	3.2498	0.00115487	0.00484854	chrX	6901378	6903985	+	WBGene00032170	Cbr-pes-23	FALSE	FALSE	TRUE	-1.11
WBGene00008230	pfk-1.2	63.2057	3.33168	0.323309	10.3049	6.69279e-25	5.90615e-23	chrV	9531819	9534537	+	WBGene00038394	Cbr-pfk-1.2	FALSE	FALSE	FALSE	-2.32
WBGene00004001	pgp-7	38.4394	1.07876	0.306082	3.52441	0.000424421	0.00203542	chrX	10864969	10870237	-	WBGene00037161	CBG17569	FALSE	FALSE	FALSE	-1.8
WBGene00016152	pho-12	39.6022	1.74461	0.313983	5.55636	2.75451e-08	3.6121e-07	chrII	5058849	5060762	-	WBGene00270458	CBG30134	FALSE	FALSE	FALSE	-1.74
WBGene00022181	pho-9	148.246	1.09501	0.262118	4.17755	2.94668e-05	0.000197893	chrIII	2757087	2760816	-	WBGene00031333	Cbr-pho-9	FALSE	FALSE	TRUE	-0.28
WBGene00012815	phy-4	38.0104	1.69474	0.303374	5.5863	2.31952e-08	3.08599e-07	chrV	19512185	19513656	-	WBGene00028075	Cbr-phy-4	FALSE	FALSE	FALSE	-1.05
WBGene00009384	piit-1	77.2776	1.20432	0.300332	4.00997	6.07253e-05	0.000376151	chrV	11609096	11610149	-	WBGene00041683	Cbr-piit-1	FALSE	FALSE	FALSE	-2.04
WBGene00004118	pqn-29	8.71057	1.46771	0.405304	3.62124	0.00029319	0.00148152	chrIII	4643999	4646346	-	WBGene00037521	Cbr-pqn-29	FALSE	FALSE	FALSE	-2.26
WBGene00004131	pqn-44	22899.7	2.37002	0.292317	8.10769	5.15891e-16	2.07572e-14	chrI	5372854	5384508	-	WBGene00033282	Cbr-pqn-44	FALSE	FALSE	TRUE	-2.2
WBGene00004146	pqn-63	10.1372	1.42894	0.402687	3.54851	0.000387412	0.00188114	chrV	9616031	9617654	+	WBGene00038562	Cbr-pqn-63	FALSE	FALSE	FALSE	-2.12
WBGene00004156	pqn-74	281.305	1.95194	0.160796	12.1393	6.54128e-34	9.63626e-32	chrIV	13329508	13331406	-	WBGene00024975	Cbr-pqn-74	FALSE	TRUE	FALSE	-2.14
WBGene00004165	pqn-84	27.9368	3.71984	0.383713	9.69434	3.18685e-22	2.2919e-20	chrIII	11700285	11702856	+	WBGene00034034	Cbr-pqn-84	FALSE	FALSE	TRUE	-1.5
WBGene00004183	prk-2	212.095	1.16154	0.227446	5.10688	3.27523e-07	3.5008e-06	chrIII	3363668	3370209	-	WBGene00031372	Cbr-prk-2	FALSE	FALSE	FALSE	-1.09
WBGene00004231	ptr-17	32.0165	1.75867	0.321303	5.47356	4.41086e-08	5.57214e-07	chrI	12834665	12843233	+	WBGene00029819	Cbr-ptr-17	FALSE	TRUE	FALSE	-1.97
WBGene00004232	ptr-18	673.799	1.89978	0.148431	12.799	1.65983e-37	2.78167e-35	chrII	12965546	12978168	+	WBGene00025756	Cbr-ptr-18	FALSE	TRUE	FALSE	-1.84
WBGene00019082	pup-3	63.4606	1.34742	0.254131	5.30207	1.14494e-07	1.33725e-06	chrI	5530618	5533710	-	WBGene00033433	Cbr-pup-3	FALSE	TRUE	FALSE	-2.21
WBGene00011505	pzf-1	9.08638	1.27451	0.405343	3.14429	0.00166492	0.00663027	chrV	15926425	15928425	-	NaN	NaN	FALSE	FALSE	FALSE	1.14
WBGene00010969	R01E6.5	6.07023	1.55768	0.400122	3.893	9.90101e-05	0.000576176	chrX	13537051	13538042	+	WBGene00029483	CBG07427	FALSE	TRUE	FALSE	-1.67
WBGene00019814	R02C2.1	8.03773	1.98349	0.404056	4.90894	9.15682e-07	8.82679e-06	chrV	236750	238192	-	WBGene00023549	CBG00041	FALSE	TRUE	TRUE	-2.39
WBGene00019817	R02C2.6	5.86418	1.41294	0.387729	3.64414	0.000268282	0.00137198	chrV	238963	240362	-	WBGene00023549	CBG00041	TRUE	FALSE	FALSE	-2.41
WBGene00044724	R02E4.3	96.7927	1.18062	0.292817	4.03194	5.53191e-05	0.000346541	chrX	4101687	4102125	-	NaN	NaN	FALSE	TRUE	FALSE	-1.91
WBGene00010992	R03D7.8	9.74123	1.87398	0.403938	4.63927	3.49645e-06	2.93519e-05	chrII	10953594	10956878	-	WBGene00039579	CBG20631	FALSE	FALSE	FALSE	-1.79
WBGene00010999	R03G8.4	10.6393	1.77024	0.402497	4.39815	1.09176e-05	8.14006e-05	chrX	13101306	13104205	-	WBGene00031083	CBG09516	FALSE	FALSE	FALSE	-1.77
WBGene00019858	R03H10.6	102.008	2.34401	0.22426	10.4522	1.43126e-25	1.35465e-23	chrII	4171294	4173875	-	NaN	NaN	FALSE	FALSE	FALSE	-2.06
WBGene00011005	R04B5.7	8.21214	1.87188	0.404781	4.62443	3.75627e-06	3.12316e-05	chrV	10089157	10090561	-	WBGene00030363	CBG08604	FALSE	FALSE	FALSE	-2.16
WBGene00019879	R05D3.5	10.9325	1.61753	0.404609	3.99777	6.39432e-05	0.000393814	chrIII	8349121	8349938	+	WBGene00037635	CBG18166	FALSE	FALSE	FALSE	-0.82
WBGene00019891	R05F9.7	21.0963	2.22476	0.362809	6.13205	8.67551e-10	1.49494e-08	chrII	4886276	4888211	+	WBGene00025347	CBG02266	FALSE	FALSE	FALSE	-1.75
WBGene00011046	R05H10.7	7.91655	1.22479	0.405556	3.02002	0.00252754	0.00946314	chrII	14855529	14857010	+	WBGene00032246	CBG11057	FALSE	FALSE	FALSE	-1.46
WBGene00011039	R05H5.4	147.431	1.28107	0.208149	6.1546	7.5267e-10	1.30818e-08	chrII	10198309	10199768	-	WBGene00024211	CBG00895	FALSE	TRUE	FALSE	-1.96
WBGene00011082	R07B1.11	176.226	1.56707	0.204696	7.6556	1.92409e-14	6.48604e-13	chrX	9856918	9858083	+	WBGene00025075	CBG01906	FALSE	FALSE	FALSE	-1.67
WBGene00011077	R07B1.5	25.6561	2.43541	0.368419	6.61043	3.83198e-11	8.14888e-10	chrX	9864069	9866531	+	WBGene00025078	CBG01909	FALSE	TRUE	FALSE	-1.69
WBGene00011101	R07D5.2	190.134	1.35934	0.160138	8.48854	2.09252e-17	9.92835e-16	chrX	15109951	15116618	-	WBGene00029611	CBG07629	FALSE	FALSE	FALSE	-1.86
WBGene00011105	R07E3.4	819.832	1.14265	0.210134	5.4377	5.39723e-08	6.69778e-07	chrX	10330547	10331900	-	WBGene00036917	CBG17210	FALSE	FALSE	TRUE	-1.38
WBGene00011120	R07E5.15	4.73772	1.42209	0.389401	3.65199	0.000260213	0.00133745	chrIII	4401442	4402505	+	WBGene00026461	CBG03643	FALSE	FALSE	FALSE	-1.47
WBGene00011171	R09E10.1	70.9802	1.55169	0.260211	5.96319	2.47362e-09	3.94635e-08	chrIV	10319351	10321170	-	WBGene00025497	CBG02447	FALSE	FALSE	FALSE	-2.15
WBGene00194658	R09E10.13	37.9577	1.56413	0.358836	4.35891	1.30713e-05	9.57395e-05	chrIV	10294811	10295267	-	WBGene00271173	CBG30364	FALSE	FALSE	TRUE	-2.25
WBGene00011172	R09E10.2	30.2619	3.47637	0.381287	9.11747	7.69016e-20	4.54615e-18	chrIV	10317558	10318293	-	WBGene00024857	CBG01653	FALSE	FALSE	FALSE	-2.18
WBGene00011175	R09E10.5	54.6249	2.28843	0.335143	6.82823	8.59702e-12	2.04215e-10	chrIV	10296046	10302310	-	WBGene00027075	CBG04396	FALSE	TRUE	FALSE	-1.82
WBGene00011177	R09E10.8	5.10863	1.18482	0.382883	3.09446	0.00197173	0.00766965	chrIV	10310116	10310429	-	WBGene00042904	CBG24898	FALSE	FALSE	FALSE	-2.16
WBGene00011290	R102.3	22.9423	2.44474	0.402066	6.08044	1.19852e-09	1.99939e-08	chrIV	10690444	10691789	+	WBGene00027117	CBG04451	FALSE	TRUE	FALSE	-2.11
WBGene00011295	R102.8	12.3195	1.82332	0.405187	4.49994	6.79717e-06	5.30842e-05	chrIV	10689601	10690195	-	WBGene00027114	CBG04447	FALSE	FALSE	TRUE	-2.03
WBGene00011298	R107.2	812.313	1.3566	0.187563	7.23275	4.73304e-13	1.35303e-11	chrIII	9043886	9045938	-	WBGene00029031	CBG06820	FALSE	FALSE	TRUE	-1.24
WBGene00011300	R107.5	25663.2	3.59737	0.0984202	36.5511	1.71373e-292	7.82617e-289	chrIII	9051592	9053793	-	WBGene00029033	CBG06824	FALSE	TRUE	TRUE	-1.92
WBGene00011185	R10D12.1	341.552	1.85553	0.21757	8.52843	1.48353e-17	7.22656e-16	chrV	13932575	13934645	-	WBGene00032547	CBG11431	FALSE	FALSE	FALSE	-2.45
WBGene00011214	R10E9.2	24.0236	1.3868	0.345154	4.0179	5.87179e-05	0.000365576	chrIII	3962731	3964158	-	WBGene00026461	CBG03643	FALSE	TRUE	FALSE	-2.03
WBGene00011231	R11A5.3	5910.04	5.9168	0.256754	23.0446	1.66589e-117	1.32308e-114	chrI	7862736	7863553	-	WBGene00042009	CBG23737	FALSE	TRUE	TRUE	-1.8
WBGene00020021	R12B2.7	11.4269	1.70277	0.398886	4.2688	1.96528e-05	0.000137494	chrIII	5815045	5815513	+	NaN	NaN	FALSE	TRUE	FALSE	-1.17
WBGene00020036	R12E2.11	4968.48	2.01856	0.163576	12.3401	5.50541e-35	8.66959e-33	chrI	4172433	4173739	-	WBGene00033092	CBG12088	FALSE	TRUE	FALSE	-1.94
WBGene00020053	R13A5.11	8.28769	1.2689	0.403004	3.1486	0.00164055	0.00655322	chrIII	7591570	7593337	-	WBGene00030795	CBG09147	FALSE	FALSE	FALSE	-1.06
WBGene00011501	rmd-1	130.502	1.56035	0.262676	5.9402	2.84677e-09	4.4868e-08	chrIII	9758927	9760389	+	WBGene00031466	Cbr-rmd-1	FALSE	TRUE	FALSE	-1.65
WBGene00022888	rnh-1.1	13.3666	2.37564	0.399375	5.94841	2.70762e-09	4.27856e-08	chrII	7525738	7528241	+	WBGene00033883	Cbr-rnh-1.1	FALSE	FALSE	TRUE	-1.62
WBGene00007303	rnh-1.3	53.5841	1.0727	0.303188	3.53805	0.00040309	0.00194537	chrI	9710093	9710767	-	NaN	NaN	FALSE	TRUE	FALSE	-1.97
WBGene00011076	scav-5	2192.07	1.68224	0.115992	14.503	1.15919e-47	2.68037e-45	chrX	9858339	9861735	+	WBGene00025076	Cbr-scav-5	FALSE	TRUE	FALSE	-1.69
WBGene00004742	scl-1	8.01163	1.61109	0.405588	3.97222	7.12062e-05	0.000430846	chrIV	13056376	13057271	+	NaN	NaN	FALSE	FALSE	FALSE	-2.12
WBGene00009891	scl-10	22.5402	1.57686	0.38977	4.04561	5.21868e-05	0.000328837	chrIV	13048457	13049835	+	NaN	NaN	FALSE	FALSE	FALSE	-1.87
WBGene00009892	scl-11	17.8869	2.90268	0.397109	7.30953	2.6808e-13	7.88075e-12	chrIV	13051377	13052149	+	NaN	NaN	FALSE	FALSE	FALSE	-1.97
WBGene00019178	scl-12	6.04756	1.50596	0.40261	3.74049	0.000183665	0.000988803	chrV	3812596	3813363	+	WBGene00024473	CBG01206	FALSE	FALSE	TRUE	-2.38
WBGene00009890	scl-9	33.4198	3.96797	0.377709	10.5054	8.16025e-26	7.84544e-24	chrIV	13047197	13048262	+	WBGene00042211	Cbr-scl-9	FALSE	FALSE	TRUE	-1.89
WBGene00004744	scp-1	31680.3	4.84804	0.142244	34.0827	1.3315e-254	4.05375e-251	chrII	9334014	9338896	+	WBGene00039261	Cbr-scp-1	FALSE	FALSE	FALSE	-1.69
WBGene00019531	scrm-5	12.6777	2.22162	0.398879	5.56967	2.55224e-08	3.37999e-07	chrIV	4162517	4164481	+	WBGene00029835	CBG07948	FALSE	TRUE	FALSE	-2.75
WBGene00009753	scrm-6	4.11325	1.28554	0.38249	3.36098	0.000776668	0.00344773	chrI	11253256	11256022	+	WBGene00029835	CBG07948	FALSE	FALSE	FALSE	-1.73
WBGene00013052	scrm-7	16.6974	1.69735	0.381655	4.44734	8.69397e-06	6.66161e-05	chrV	14778336	14779714	-	WBGene00029835	CBG07948	FALSE	FALSE	FALSE	-2.3
WBGene00019530	scrm-8	7.44987	1.6889	0.404848	4.17168	3.02363e-05	0.00020254	chrIV	4164692	4166230	+	WBGene00029835	CBG07948	FALSE	TRUE	FALSE	-2.77
WBGene00016948	scrt-1	4.69158	1.35819	0.386036	3.5183	0.000434314	0.00207686	chrI	2568872	2570746	+	WBGene00026890	Cbr-scrt-1	FALSE	TRUE	FALSE	-1.18
WBGene00010237	scvp-1	5.66492	1.31061	0.401512	3.26418	0.00109781	0.00463825	chrV	10930778	10931289	-	WBGene00031266	Cbr-scvp-1	FALSE	FALSE	TRUE	-2.09
WBGene00008782	sdz-14	6.17491	1.37313	0.397812	3.45169	0.000557085	0.0025815	chrI	12216249	12217766	-	NaN	NaN	FALSE	FALSE	FALSE	-2.1
WBGene00017752	sdz-15	12.0853	1.849	0.398778	4.63665	3.54098e-06	2.96848e-05	chrIII	6498476	6500023	+	NaN	NaN	FALSE	FALSE	FALSE	-1.36
WBGene00009728	sdz-19	26.6188	1.90786	0.375629	5.0791	3.79226e-07	4.00424e-06	chrX	12502802	12503338	-	WBGene00029710	CBG07761	FALSE	FALSE	FALSE	-1.57
WBGene00018828	sdz-21	18.8717	2.08489	0.401683	5.19039	2.09857e-07	2.32613e-06	chrIII	5654984	5656994	-	WBGene00030643	Cbr-sdz-21.2	FALSE	FALSE	FALSE	-1.49
WBGene00011049	sdz-26	18.4982	1.70553	0.387302	4.40363	1.06455e-05	7.9632e-05	chrII	14381772	14383376	+	NaN	NaN	FALSE	TRUE	FALSE	-1.6
WBGene00011432	sdz-30	9.91935	2.09106	0.404857	5.16494	2.40514e-07	2.63714e-06	chrI	13307031	13308787	+	WBGene00039373	CBG20384	FALSE	FALSE	FALSE	-2.15
WBGene00016578	sdz-5	10.1064	1.92401	0.405275	4.74741	2.06036e-06	1.81557e-05	chrII	3008700	3009889	+	NaN	NaN	FALSE	FALSE	FALSE	-1.78
WBGene00010808	sepa-1	26.9808	3.08092	0.393957	7.82045	5.26353e-15	1.90771e-13	chrI	13298209	13300716	-	WBGene00039373	CBG20384	FALSE	FALSE	FALSE	-1.97
WBGene00017681	slc-17.5	1201.89	1.24214	0.189956	6.53913	6.18779e-11	1.26718e-09	chrV	8282333	8284900	-	WBGene00032437	Cbr-slc-17.5	FALSE	FALSE	FALSE	-2.11
WBGene00008320	slc-25A29	243.437	1.01621	0.22714	4.47394	7.67925e-06	5.94394e-05	chrV	14653491	14658174	-	WBGene00027210	Cbr-slc-25A29	FALSE	FALSE	FALSE	-2.04
WBGene00004877	smf-2	9.83082	1.60986	0.405599	3.96909	7.21485e-05	0.000435538	chrX	6716358	6718670	-	WBGene00032133	Cbr-smf-2	FALSE	FALSE	FALSE	-1.69
WBGene00004901	snf-2	6.26989	1.57167	0.399713	3.932	8.42409e-05	0.000499134	chrI	8871791	8875253	+	WBGene00035919	Cbr-snf-2	FALSE	FALSE	FALSE	-2.12
WBGene00004904	snf-5	16.9574	2.38358	0.395961	6.01974	1.747e-09	2.8621e-08	chrII	12861963	12865883	-	WBGene00025729	Cbr-snf-5	FALSE	TRUE	TRUE	-0.92
WBGene00004906	snf-7	41.4557	3.84402	0.367351	10.4642	1.26177e-25	1.20674e-23	chrIII	13005461	13011130	+	WBGene00035919	Cbr-snf-2	FALSE	FALSE	FALSE	-2.25
WBGene00007036	sod-5	6.9052	1.32881	0.405287	3.2787	0.00104287	0.00444058	chrII	4417683	4419131	+	WBGene00023778	Cbr-sod-5	FALSE	TRUE	FALSE	-2.04
WBGene00010791	sodh-2	95.0327	2.43868	0.284715	8.56536	1.07739e-17	5.40678e-16	chrV	11889719	11891194	-	WBGene00041627	Cbr-sodh-2	FALSE	FALSE	TRUE	-2
WBGene00010587	sol-2	222.738	1.12387	0.17738	6.33596	2.3587e-10	4.39209e-09	chrI	14721763	14724739	-	WBGene00038913	Cbr-sol-2	FALSE	TRUE	FALSE	-1.84
WBGene00020840	spch-3	21.1635	3.17808	0.396815	8.00896	1.15682e-15	4.46759e-14	chrI	6098927	6099731	+	NaN	NaN	FALSE	FALSE	FALSE	-2.29
WBGene00004958	spe-4	121.132	1.40201	0.238956	5.86724	4.43116e-09	6.73971e-08	chrI	7454660	7456953	+	WBGene00032965	Cbr-spe-4	FALSE	FALSE	TRUE	-2.16
WBGene00009217	spe-45	33.0732	3.20191	0.373004	8.58412	9.15349e-18	4.60625e-16	chrIV	12387720	12390095	-	WBGene00087797	Cbr-spe-45	FALSE	FALSE	TRUE	-2.43
WBGene00012296	spe-46	41.7072	2.50868	0.352387	7.11911	1.08626e-12	2.94401e-11	chrI	9056293	9057822	+	WBGene00033383	Cbr-spe-46	FALSE	FALSE	FALSE	-2.21
WBGene00021271	spe-47	82.4063	2.8299	0.303224	9.33269	1.0322e-20	6.73402e-19	chrI	2617560	2620425	+	WBGene00035353	Cbr-spe-47	FALSE	FALSE	FALSE	-1.73
WBGene00019667	spe-49	187.225	4.02546	0.259032	15.5404	1.84739e-54	4.96269e-52	chrV	6281359	6284863	+	WBGene00038213	Cbr-spe-49	FALSE	FALSE	TRUE	-1.81
WBGene00004959	spe-5	169.672	1.83626	0.177263	10.3589	3.81147e-25	3.42976e-23	chrI	5101682	5103467	-	WBGene00032082	Cbr-spe-5	FALSE	FALSE	FALSE	-2.2
WBGene00019006	spg-20	438.882	1.1847	0.127043	9.3252	1.10779e-20	7.20142e-19	chrI	6550536	6552665	-	WBGene00033577	Cbr-spg-20	FALSE	TRUE	TRUE	-2.3
WBGene00004996	spp-11	42.5983	3.59516	0.373705	9.62031	6.56362e-22	4.6835e-20	chrII	6405391	6407379	-	WBGene00025666	Cbr-spp-11	FALSE	FALSE	FALSE	-1.91
WBGene00044284	spp-21	11.4711	2.29703	0.405598	5.66333	1.48467e-08	2.04375e-07	chrX	11490130	11490494	+	WBGene00036987	Cbr-spp-9	TRUE	FALSE	FALSE	-2.28
WBGene00004994	spp-9	16.0004	2.51821	0.392972	6.40812	1.47322e-10	2.8298e-09	chrX	11487788	11488178	+	WBGene00036987	Cbr-spp-9	FALSE	FALSE	FALSE	-2.28
WBGene00021596	spsb-2	68.1488	1.14539	0.242158	4.72994	2.24588e-06	1.96294e-05	chrII	15230343	15232803	+	WBGene00039596	Cbr-spsb-1	FALSE	FALSE	FALSE	-1.27
WBGene00011737	sqst-1	5962.47	1.59802	0.254447	6.28038	3.37753e-10	6.15743e-09	chrIV	12034252	12037051	+	WBGene00028520	Cbr-sqst-1	FALSE	TRUE	FALSE	-2.23
WBGene00012067	sqst-3	9.89628	1.98289	0.405574	4.88909	1.01304e-06	9.63815e-06	chrV	19230765	19232020	+	NaN	NaN	FALSE	FALSE	FALSE	-1.97
WBGene00015448	srab-3	12.3536	1.22582	0.404546	3.03011	0.00244462	0.00918845	chrV	5105764	5107916	-	WBGene00030425	Cbr-srab-3.1	FALSE	FALSE	FALSE	-2.37
WBGene00005072	srb-7	36.0722	2.2152	0.31652	6.99862	2.58493e-12	6.59481e-11	chrIII	7177530	7178853	+	NaN	NaN	FALSE	FALSE	FALSE	-1.37
WBGene00019745	srbc-57	6.4356	1.2234	0.396622	3.08454	0.00203869	0.00788997	chrV	467567	468560	-	WBGene00038039	CBG18659	FALSE	FALSE	FALSE	-0.56
WBGene00019982	srbc-58	18.7877	1.98492	0.369117	5.37749	7.55335e-08	9.11943e-07	chrV	774995	777272	+	WBGene00028623	Cbr-srbc-58	FALSE	TRUE	FALSE	-2.2
WBGene00019981	srbc-59	12.0111	1.87425	0.404085	4.63825	3.51366e-06	2.94828e-05	chrV	778639	780223	+	WBGene00040536	Cbr-srbc-59.1	FALSE	FALSE	FALSE	-2.22
WBGene00007127	srbc-78	9.31125	2.05094	0.405037	5.06357	4.11469e-07	4.31972e-06	chrV	20487645	20489202	-	WBGene00038039	CBG18659	FALSE	FALSE	FALSE	-1.6
WBGene00007123	srbc-79	5.19518	1.30296	0.397802	3.2754	0.00105511	0.0044833	chrV	20490771	20492485	-	WBGene00038039	CBG18659	FALSE	FALSE	FALSE	-1.83
WBGene00005088	srd-10	30.2683	2.56436	0.358602	7.15101	8.61441e-13	2.37345e-11	chrIV	13575058	13576740	+	WBGene00024939	Cbr-srd-10	FALSE	FALSE	FALSE	-2.05
WBGene00005089	srd-11	9.2292	1.43834	0.405023	3.55126	0.000383384	0.00186555	chrV	13617851	13619686	-	WBGene00032631	Cbr-srd-11	FALSE	FALSE	TRUE	-1.87
WBGene00005128	srd-50	5.86771	1.56804	0.40073	3.91296	9.11731e-05	0.000535517	chrX	13478621	13481804	-	WBGene00029494	Cbr-srd-50	FALSE	FALSE	TRUE	-1.07
WBGene00005140	srd-63	24.8374	2.64643	0.386699	6.84365	7.71984e-12	1.84579e-10	chrV	16392482	16393828	-	NaN	NaN	FALSE	FALSE	FALSE	-2.14
WBGene00005146	srd-69	8.15235	1.71226	0.405601	4.22154	2.42634e-05	0.000166311	chrIII	2362948	2366278	+	NaN	NaN	FALSE	TRUE	FALSE	-1.06
WBGene00005149	sre-1	47.8519	1.1647	0.264768	4.39893	1.08783e-05	8.11412e-05	chrII	7709789	7711444	+	WBGene00033830	Cbr-sre-1	FALSE	FALSE	FALSE	-1.74
WBGene00018139	sre-24	8.42046	2.00767	0.405561	4.95034	7.40823e-07	7.26779e-06	chrV	2884711	2886425	+	NaN	NaN	FALSE	FALSE	FALSE	-1.91
WBGene00012333	sre-43	33.4967	1.346	0.313056	4.29954	1.71151e-05	0.000121982	chrII	13966534	13969079	-	WBGene00039668	Cbr-sre-43	FALSE	FALSE	FALSE	-0.7
WBGene00012329	sre-44	28.3725	2.59404	0.348882	7.43529	1.04338e-13	3.2195e-12	chrII	13949590	13951869	+	WBGene00039672	Cbr-sre-44	FALSE	FALSE	FALSE	0.2
WBGene00010071	sre-45	48.8331	2.26535	0.28963	7.82154	5.21815e-15	1.89503e-13	chrII	13517912	13522925	+	WBGene00039690	Cbr-sre-45	FALSE	FALSE	FALSE	-1.46
WBGene00012725	sre-47	21.2195	2.97774	0.387837	7.67781	1.61831e-14	5.51524e-13	chrII	13983397	13984651	-	WBGene00039665	Cbr-sre-48	FALSE	FALSE	FALSE	-1.62
WBGene00012724	sre-48	45.5054	4.20081	0.359079	11.6989	1.29182e-31	1.69767e-29	chrII	13977164	13979883	-	WBGene00039665	Cbr-sre-48	FALSE	TRUE	FALSE	-1.23
WBGene00005174	srg-17	14.5143	2.15916	0.404769	5.3343	9.59128e-08	1.13917e-06	chrII	12473706	12475234	+	WBGene00039878	Cbr-srg-17	FALSE	FALSE	TRUE	-2.17
WBGene00005177	srg-20	40.9656	3.06421	0.34271	8.94113	3.85209e-19	2.19894e-17	chrII	1636692	1638967	+	NaN	NaN	FALSE	FALSE	FALSE	-2.38
WBGene00005178	srg-21	8.57578	1.42329	0.405015	3.51416	0.000441144	0.00210292	chrII	3088474	3091296	-	NaN	NaN	FALSE	FALSE	FALSE	-1.24
WBGene00005179	srg-22	9.36452	1.53531	0.40355	3.80451	0.000142083	0.000786732	chrII	3091503	3093452	-	NaN	NaN	FALSE	FALSE	FALSE	-1.37
WBGene00005180	srg-23	7.83262	1.21233	0.403684	3.00317	0.00267182	0.00993611	chrII	3093902	3096160	-	NaN	NaN	TRUE	TRUE	FALSE	-1.6
WBGene00005181	srg-24	5.0571	1.30637	0.39767	3.28507	0.00101959	0.0043628	chrII	3098403	3100646	-	NaN	NaN	FALSE	FALSE	FALSE	-1.67
WBGene00005183	srg-26	7.42674	1.62296	0.405457	4.00278	6.26021e-05	0.000386205	chrV	5331267	5333055	+	WBGene00303240	CBG31302	FALSE	TRUE	FALSE	-1.83
WBGene00005185	srg-28	4.48023	1.30512	0.383072	3.40699	0.000656842	0.00297646	chrV	5334888	5336329	+	WBGene00028986	Cbr-srg-29	FALSE	FALSE	FALSE	-1.84
WBGene00005191	srg-34	45.3712	1.44804	0.316516	4.57495	4.76339e-06	3.87068e-05	chrV	18562178	18564886	-	WBGene00033769	Cbr-srg-34	FALSE	TRUE	FALSE	-2.13
WBGene00005202	srg-45	17.4655	1.6515	0.374116	4.41442	1.01282e-05	7.63882e-05	chrV	12307490	12308658	+	WBGene00041535	CBG23121	FALSE	FALSE	FALSE	-2.08
WBGene00005203	srg-46	8.14726	1.43526	0.403885	3.55364	0.000379943	0.00185127	chrV	13363715	13364728	+	WBGene00088786	Cbr-srg-46	FALSE	FALSE	FALSE	-1.64
WBGene00005204	srg-47	20.856	2.45424	0.393641	6.23472	4.52593e-10	8.08163e-09	chrV	14554980	14556287	-	NaN	NaN	FALSE	FALSE	FALSE	-1.98
WBGene00005217	srg-60	3.79589	1.11277	0.370274	3.00527	0.00265345	0.00987785	chrV	2721290	2722655	-	NaN	NaN	FALSE	FALSE	FALSE	-2.04
WBGene00005221	srg-64	8.42586	1.98492	0.403946	4.91381	8.93236e-07	8.61952e-06	chrX	15736844	15740626	-	WBGene00042799	Cbr-srg-64	FALSE	FALSE	FALSE	-1.18
WBGene00005382	srh-166	10.488	2.18255	0.404181	5.39993	6.66655e-08	8.15659e-07	chrV	20524700	20525866	-	NaN	NaN	FALSE	FALSE	FALSE	-2.44
WBGene00005385	srh-169	14.9084	2.60023	0.39898	6.5172	7.16328e-11	1.44908e-09	chrV	4047841	4049354	+	WBGene00031250	Cbr-srh-159	FALSE	FALSE	FALSE	-2.41
WBGene00005242	srh-17	10.8723	1.24617	0.400067	3.11491	0.00184003	0.00722215	chrV	14661305	14662928	+	WBGene00027202	Cbr-srh-17	FALSE	FALSE	TRUE	-2.03
WBGene00005399	srh-184	6.54799	1.31058	0.403447	3.24845	0.00116035	0.00486933	chrV	10796863	10798157	-	WBGene00031249	Cbr-srh-184	FALSE	FALSE	FALSE	-2.07
WBGene00005428	srh-218	8.39401	1.41306	0.404344	3.49469	0.00047461	0.00224197	chrV	15493980	15495761	+	NaN	NaN	FALSE	TRUE	FALSE	-2.24
WBGene00005429	srh-219	10.6824	2.28399	0.404836	5.64177	1.68312e-08	2.30477e-07	chrV	15496269	15497567	+	NaN	NaN	FALSE	FALSE	FALSE	-2.29
WBGene00005475	srh-269	7.34363	1.27054	0.403036	3.15242	0.00161921	0.00647934	chrV	16590101	16592042	-	WBGene00041126	Cbr-srh-269	FALSE	FALSE	FALSE	-1.13
WBGene00005490	srh-286	12.9224	2.53065	0.402317	6.29019	3.17084e-10	5.80379e-09	chrV	17841483	17844206	-	NaN	NaN	FALSE	FALSE	FALSE	-2.11
WBGene00005253	srh-30	14.8833	1.45317	0.386824	3.75668	0.000172186	0.000936663	chrV	6769662	6771704	-	WBGene00038302	Cbr-srh-30	FALSE	FALSE	FALSE	-1.95
WBGene00010261	srh-308	14.5662	2.61966	0.404299	6.47951	9.20215e-11	1.82316e-09	chrV	14015978	14017576	-	WBGene00031249	Cbr-srh-184	FALSE	FALSE	FALSE	-2.28
WBGene00005262	srh-39	56.1368	2.84666	0.30376	9.3714	7.15752e-21	4.72009e-19	chrII	7763937	7765516	-	WBGene00033817	Cbr-srh-39	FALSE	FALSE	TRUE	-1.53
WBGene00005279	srh-56	23.4378	1.78708	0.367301	4.86544	1.14205e-06	1.07535e-05	chrV	2771860	2773519	+	NaN	NaN	FALSE	FALSE	FALSE	-2.42
WBGene00005291	srh-70	8.88213	1.27426	0.40127	3.17557	0.00149544	0.00605974	chrII	12516753	12517858	-	WBGene00037317	CBG17775	FALSE	TRUE	FALSE	-0.9
WBGene00005292	srh-71	37.3024	1.33936	0.30701	4.36261	1.28523e-05	9.42861e-05	chrII	3123506	3124899	+	WBGene00037317	CBG17775	FALSE	FALSE	FALSE	-1.53
WBGene00005297	srh-76	12.0994	1.67355	0.40509	4.13129	3.60726e-05	0.000236502	chrV	5833831	5835183	+	WBGene00030915	Cbr-srh-76	FALSE	FALSE	FALSE	-2.06
WBGene00005524	sri-12	10.5972	1.55532	0.402812	3.86116	0.00011285	0.000642789	chrI	11699169	11701178	+	NaN	NaN	FALSE	FALSE	FALSE	-1.95
WBGene00005530	sri-18	18.8081	1.23071	0.371558	3.31229	0.000925366	0.00401607	chrV	10258661	10260554	-	WBGene00031131	Cbr-sri-18	FALSE	FALSE	FALSE	-2.15
WBGene00005548	sri-36	87.2491	4.43945	0.348226	12.7488	3.1669e-37	5.2117e-35	chrII	2583782	2585593	-	WBGene00087585	CBG26171	FALSE	FALSE	TRUE	-1.77
WBGene00005551	sri-39	85.769	4.12556	0.35552	11.6043	3.91901e-31	4.93715e-29	chrII	2587504	2589754	+	WBGene00038740	CBG19540	FALSE	FALSE	FALSE	-1.77
WBGene00005557	sri-45	20.3197	1.18243	0.351909	3.36004	0.000779319	0.00345781	chrII	660091	661796	-	NaN	NaN	FALSE	FALSE	FALSE	-0.63
WBGene00005518	sri-6	5.46727	1.20945	0.398886	3.03208	0.00242877	0.00914393	chrV	13185684	13187428	+	NaN	NaN	FALSE	FALSE	FALSE	-2.26
WBGene00005577	sri-65	6.48491	1.43679	0.403896	3.55731	0.000374667	0.00182824	chrV	16386662	16388368	-	NaN	NaN	FALSE	FALSE	FALSE	-2.01
WBGene00005583	sri-71	4.55778	1.27457	0.381103	3.34444	0.000824502	0.0036257	chrII	2627749	2629196	+	NaN	NaN	FALSE	TRUE	FALSE	-1.56
WBGene00005586	sri-74	13.9942	1.70916	0.393237	4.34639	1.38398e-05	0.000101124	chrII	2580901	2583346	-	WBGene00038695	CBG19486	FALSE	FALSE	FALSE	-1.76
WBGene00005591	srj-1	87.6726	4.19938	0.294133	14.2771	3.03799e-46	6.76768e-44	chrIV	11963910	11965427	-	NaN	NaN	FALSE	FALSE	FALSE	-2.24
WBGene00005621	srj-37	5.09033	1.29801	0.390853	3.32096	0.000897078	0.00390258	chrV	638628	639928	+	WBGene00037438	Cbr-srj-37	FALSE	FALSE	FALSE	-0.96
WBGene00005640	srn-1	22.4401	1.44462	0.359655	4.01668	5.9025e-05	0.000367112	chrV	6284920	6286434	-	WBGene00038214	Cbr-srn-1	FALSE	FALSE	FALSE	-1.75
WBGene00005661	srr-10	18.4394	2.70839	0.389474	6.95396	3.55168e-12	8.88746e-11	chrV	7735619	7737024	+	WBGene00030397	Cbr-srr-10	FALSE	FALSE	FALSE	-1.94
WBGene00005657	srr-6	177.722	3.12629	0.274088	11.4062	3.89434e-30	4.60503e-28	chrV	5012994	5015059	+	WBGene00030400	Cbr-srr-6	FALSE	FALSE	FALSE	-1.66
WBGene00005660	srr-9	15.6816	2.65543	0.397973	6.67239	2.51679e-11	5.53906e-10	chrV	7738010	7739596	+	WBGene00030397	Cbr-srr-10	FALSE	FALSE	FALSE	-1.98
WBGene00018180	srsx-22	15.4579	2.53845	0.39639	6.40391	1.51447e-10	2.90597e-09	chrV	8351671	8353085	+	WBGene00088306	CBG26892	FALSE	FALSE	FALSE	-2.04
WBGene00008247	srsx-26	8.87405	1.24392	0.402126	3.09335	0.00197911	0.00769199	chrV	10149093	10150383	+	NaN	NaN	FALSE	FALSE	FALSE	-2.2
WBGene00008250	srsx-29	15.8842	1.59705	0.383499	4.16442	3.12145e-05	0.000208329	chrV	10154998	10156381	+	WBGene00031098	Cbr-srsx-29	FALSE	FALSE	FALSE	-2.02
WBGene00008251	srsx-30	52.6962	2.21103	0.292004	7.57192	3.6775e-14	1.18897e-12	chrV	10158833	10160297	+	WBGene00031099	Cbr-srsx-30	FALSE	FALSE	FALSE	-2.05
WBGene00008552	srsx-31	8.54325	1.90204	0.405594	4.68951	2.73865e-06	2.3542e-05	chrV	11254013	11255080	-	WBGene00041557	Cbr-srsx-31	FALSE	FALSE	FALSE	-2.04
WBGene00011837	srsx-33	8.18439	1.49802	0.404726	3.70132	0.000214482	0.00113301	chrV	11251415	11252529	-	WBGene00027360	CBG04744	FALSE	FALSE	FALSE	-2.09
WBGene00022404	srsx-5	24.7678	2.01302	0.350432	5.74438	9.22582e-09	1.31663e-07	chrV	7928960	7930337	+	WBGene00030387	Cbr-srsx-5	FALSE	TRUE	FALSE	-2.2
WBGene00022405	srsx-6	52.5368	2.09106	0.310995	6.72377	1.77085e-11	4.00845e-10	chrV	7927084	7928451	+	WBGene00030388	Cbr-srsx-6	TRUE	TRUE	FALSE	-2.18
WBGene00022406	srsx-7	81.2121	3.11656	0.280727	11.1018	1.22995e-28	1.32943e-26	chrV	7925783	7926756	+	WBGene00088421	Cbr-srsx-7	TRUE	TRUE	FALSE	-2.24
WBGene00012181	srt-11	6.77826	1.50245	0.401966	3.73775	0.000185673	0.000996976	chrII	14805986	14808087	+	WBGene00024662	CBG01418	FALSE	FALSE	FALSE	-1.03
WBGene00014191	srt-22	37.9031	3.78188	0.381283	9.91882	3.44806e-23	2.6917e-21	chrV	15314668	15315927	-	WBGene00031780	Cbr-srt-22.1	FALSE	FALSE	FALSE	0.2
WBGene00021947	srt-23	46.154	3.58222	0.372885	9.60677	7.4862e-22	5.25963e-20	chrIV	756721	759084	+	WBGene00087886	CBG26472	FALSE	FALSE	FALSE	-1.48
WBGene00016051	srt-27	6.99894	1.73091	0.39924	4.3355	1.45427e-05	0.000105669	chrV	2719696	2720863	-	WBGene00028894	CBG06649	FALSE	FALSE	FALSE	-2.02
WBGene00016049	srt-28	33.0131	1.28294	0.346993	3.6973	0.000217901	0.00114808	chrV	2712034	2713632	-	WBGene00028892	Cbr-srt-28	TRUE	FALSE	FALSE	-2.38
WBGene00016050	srt-29	7.78908	1.91046	0.405179	4.71511	2.41575e-06	2.10136e-05	chrV	2717395	2719135	-	WBGene00028893	CBG06648	FALSE	FALSE	TRUE	-2.08
WBGene00008268	srt-32	32.432	2.75306	0.361474	7.61622	2.61221e-14	8.62879e-13	chrV	14559612	14561293	+	NaN	NaN	FALSE	FALSE	FALSE	-2.05
WBGene00018557	srt-38	10.4533	1.83104	0.404919	4.52199	6.12599e-06	4.84012e-05	chrV	4269486	4271358	-	WBGene00024658	CBG01414	FALSE	FALSE	FALSE	-2.08
WBGene00018114	srt-41	743.551	4.01855	0.37479	10.7221	8.01309e-27	8.13195e-25	chrV	1799726	1803143	-	WBGene00028622	CBG06327	FALSE	TRUE	FALSE	-1.84
WBGene00021599	srt-42	5078.12	4.94727	0.321874	15.3702	2.59285e-53	6.86429e-51	chrV	1807450	1809468	+	WBGene00028622	CBG06327	FALSE	TRUE	FALSE	-1.87
WBGene00012770	srt-47	25.9432	1.05756	0.351953	3.00485	0.00265715	0.00988961	chrIV	15049411	15053371	-	WBGene00034529	Cbr-srt-47	FALSE	FALSE	FALSE	-2.08
WBGene00021413	srt-52	18.7077	2.95449	0.391177	7.55283	4.25906e-14	1.36253e-12	chrV	49956	56046	-	WBGene00028721	Cbr-srt-52	FALSE	TRUE	FALSE	-2.27
WBGene00005723	srv-12	5.55633	1.24333	0.392646	3.16655	0.00154258	0.00622314	chrIV	10051286	10053650	-	WBGene00026295	Cbr-srv-12	FALSE	FALSE	FALSE	-2.06
WBGene00005725	srv-14	58.8598	2.36368	0.315027	7.50308	6.23363e-14	1.96327e-12	chrIV	15891707	15894229	-	NaN	NaN	TRUE	FALSE	FALSE	-1.98
WBGene00005745	srv-34	26.2027	1.07363	0.341001	3.14846	0.00164131	0.00655339	chrV	16372417	16374776	-	WBGene00041284	Cbr-srv-34	FALSE	TRUE	FALSE	-1.86
WBGene00005748	srw-1	7.6224	1.4062	0.403329	3.48648	0.000489416	0.00230179	chrV	15198255	15199396	+	WBGene00037962	Cbr-srw-1	FALSE	TRUE	FALSE	-2.6
WBGene00005757	srw-10	22.7937	1.92557	0.371976	5.17661	2.25953e-07	2.48944e-06	chrIII	12755348	12756613	+	WBGene00024480	CBG01214	TRUE	FALSE	FALSE	-2.15
WBGene00005785	srw-38	4.77779	1.30314	0.391666	3.32717	0.000877321	0.00382483	chrV	19836442	19839342	+	WBGene00042714	Cbr-srw-33.2	FALSE	FALSE	FALSE	-1.52
WBGene00005786	srw-39	8.92178	1.99815	0.405477	4.92791	8.31142e-07	8.08739e-06	chrV	20169480	20172041	-	WBGene00042714	Cbr-srw-33.2	FALSE	TRUE	FALSE	-1.3
WBGene00005753	srw-6	5.04045	1.20177	0.399308	3.00963	0.00261565	0.00975699	chrV	3808636	3810708	+	NaN	NaN	FALSE	FALSE	FALSE	-2.28
WBGene00005809	srw-62	7.39242	1.9408	0.403707	4.80745	1.52867e-06	1.39551e-05	chrII	7825407	7826694	+	WBGene00271513	CBG30910	FALSE	FALSE	FALSE	-1.46
WBGene00005814	srw-67	6.19337	1.50706	0.402375	3.7454	0.000180104	0.0009725	chrV	7417660	7419828	+	WBGene00031870	CBG10490	FALSE	FALSE	FALSE	-1.49
WBGene00005815	srw-68	9.41504	1.67926	0.402343	4.1737	2.99686e-05	0.000200821	chrV	7425259	7426694	-	WBGene00036757	Cbr-srw-69	FALSE	FALSE	FALSE	-2.19
WBGene00005816	srw-69	15.2699	1.46088	0.390585	3.74023	0.000183853	0.000989235	chrV	7427326	7428980	-	WBGene00036757	Cbr-srw-69	FALSE	FALSE	FALSE	-2.35
WBGene00005818	srw-71	32.4728	2.55459	0.330661	7.72571	1.11234e-14	3.90002e-13	chrV	7429684	7431116	-	NaN	NaN	FALSE	FALSE	FALSE	-2.47
WBGene00005820	srw-73	5.80918	1.22628	0.402107	3.04964	0.00229119	0.00871819	chrV	16586742	16588528	-	NaN	NaN	FALSE	FALSE	FALSE	-1.07
WBGene00005833	srw-86	136.451	1.37736	0.29096	4.73385	2.20298e-06	1.92729e-05	chrV	19400142	19400715	-	NaN	NaN	FALSE	FALSE	FALSE	-1.42
WBGene00006027	srx-136	8.71154	1.31559	0.405596	3.2436	0.00118029	0.00494275	chrV	13857448	13858942	+	WBGene00271630	CBG30990	FALSE	FALSE	FALSE	-2.56
WBGene00005922	srx-31	10.9727	2.28257	0.405593	5.62773	1.82594e-08	2.48173e-07	chrV	821784	823022	-	WBGene00040237	CBG21480	TRUE	FALSE	FALSE	-2.2
WBGene00005932	srx-41	27.4443	1.20757	0.324858	3.71722	0.000201429	0.0010718	chrV	3634688	3637173	-	WBGene00024633	CBG01386	FALSE	FALSE	FALSE	-2.52
WBGene00005938	srx-47	8.17774	1.61274	0.405605	3.97613	7.00465e-05	0.000425803	chrV	9349987	9351332	+	WBGene00038514	Cbr-srx-47	FALSE	FALSE	FALSE	-2.2
WBGene00005967	srx-76	16.828	1.95849	0.390086	5.02065	5.14963e-07	5.29664e-06	chrV	11891812	11893451	+	WBGene00041626	Cbr-srx-76	FALSE	TRUE	FALSE	-2.02
WBGene00005977	srx-86	7.6078	1.27908	0.405436	3.15483	0.00160591	0.00643881	chrV	11562943	11564508	+	WBGene00041695	Cbr-srx-86	FALSE	FALSE	FALSE	-2.17
WBGene00005979	srx-88	4.19745	1.17296	0.384836	3.04794	0.00230419	0.00875428	chrV	11583512	11585115	+	WBGene00040232	CBG21469	FALSE	FALSE	FALSE	-2
WBGene00044012	srxa-19	7.22515	1.46671	0.403208	3.63761	0.000275181	0.0014002	chrV	10121134	10122770	-	WBGene00031090	Cbr-srxa-19	FALSE	FALSE	FALSE	-1.89
WBGene00017564	srxa-4	5.12175	1.22074	0.393972	3.09854	0.00194476	0.00757623	chrV	7420462	7421713	+	WBGene00036393	CBG16463	FALSE	FALSE	FALSE	-1.51
WBGene00010530	srz-61	5.84803	1.33993	0.397104	3.37426	0.000740152	0.00330895	chrIV	16321166	16323195	+	NaN	NaN	FALSE	FALSE	FALSE	-1.88
WBGene00010091	ssp-35	7.9713	1.59931	0.405604	3.94305	8.04527e-05	0.000480585	chrV	12263369	12263896	-	WBGene00041786	Cbr-ssp-34	FALSE	TRUE	FALSE	-2.27
WBGene00006056	sss-1	10.1015	1.86351	0.405249	4.59844	4.25672e-06	3.49158e-05	chrIV	9892739	9893779	-	WBGene00025332	Cbr-sss-1	FALSE	FALSE	FALSE	-2.31
WBGene00007364	stdh-3	22.7096	1.51448	0.35544	4.26087	2.03633e-05	0.00014203	chrV	13904611	13905996	+	WBGene00032555	CBG11441	FALSE	FALSE	FALSE	-2.55
WBGene00007670	stg-1	38.8599	1.55368	0.291307	5.33349	9.63429e-08	1.14353e-06	chrII	10056311	10060582	-	WBGene00270470	CBG30146	FALSE	FALSE	FALSE	-1.54
WBGene00006169	str-118	177.307	2.76881	0.267856	10.3369	4.79643e-25	4.27397e-23	chrV	10052155	10053893	+	WBGene00027397	Cbr-str-118	FALSE	FALSE	FALSE	-2.12
WBGene00006174	str-123	7.82812	2.02189	0.404593	4.99735	5.81222e-07	5.89844e-06	chrX	12790336	12791751	+	NaN	NaN	FALSE	FALSE	FALSE	-1.66
WBGene00006175	str-124	6.99983	1.24457	0.390259	3.18908	0.00142728	0.00581577	chrX	12787661	12789256	+	WBGene00023567	Cbr-str-123	FALSE	FALSE	FALSE	-1.67
WBGene00006184	str-136	8.61289	2.0436	0.404611	5.05077	4.40039e-07	4.59588e-06	chrV	8277516	8278930	-	NaN	NaN	FALSE	FALSE	FALSE	-1.87
WBGene00006204	str-159	4.82682	1.41947	0.389102	3.64805	0.000264237	0.00135509	chrIV	4909339	4910962	+	WBGene00032733	CBG11639	TRUE	TRUE	FALSE	-1.46
WBGene00006229	str-187	7.95368	1.25586	0.405602	3.09629	0.00195957	0.00762905	chrIV	17265579	17266926	+	WBGene00023837	Cbr-str-187	FALSE	FALSE	FALSE	0.05
WBGene00006237	str-204	23.269	2.14089	0.367369	5.82763	5.62206e-09	8.36305e-08	chrV	7159691	7161016	+	WBGene00038202	Cbr-str-204	FALSE	FALSE	TRUE	-2.56
WBGene00006239	str-206	9.6888	2.16359	0.405437	5.33644	9.4789e-08	1.12875e-06	chrV	6218134	6219562	+	WBGene00038201	Cbr-str-206	FALSE	FALSE	FALSE	-2.05
WBGene00006272	str-245	35.2518	1.61966	0.355601	4.55472	5.24552e-06	4.21557e-05	chrI	14852818	14854607	+	WBGene00038889	Cbr-str-245	FALSE	FALSE	FALSE	-1.62
WBGene00006273	str-246	5.18791	1.30174	0.390239	3.33574	0.000850719	0.00372843	chrIII	11077704	11079446	+	NaN	NaN	FALSE	FALSE	FALSE	-1.11
WBGene00006071	str-3	5.45758	1.34683	0.398847	3.37681	0.000733321	0.00328323	chrIV	11098448	11100371	-	NaN	NaN	FALSE	FALSE	FALSE	-2.17
WBGene00006096	str-30	10.6981	1.64278	0.399936	4.1076	3.99794e-05	0.000259525	chrV	3725072	3726775	+	WBGene00028670	Cbr-str-31	TRUE	FALSE	TRUE	-2.65
WBGene00006098	str-32	11.6351	2.00949	0.405604	4.95432	7.25821e-07	7.14362e-06	chrV	4879945	4881477	-	NaN	NaN	FALSE	FALSE	FALSE	-1.79
WBGene00006113	str-48	12.6016	2.23556	0.398355	5.61198	2.00021e-08	2.69221e-07	chrIV	7122194	7123947	+	WBGene00028159	Cbr-str-48	FALSE	FALSE	FALSE	-1.91
WBGene00006142	str-83	15.7196	1.32121	0.403509	3.27431	0.0010592	0.00449648	chrV	3977264	3978811	+	WBGene00024535	Cbr-str-82	FALSE	FALSE	FALSE	-2.14
WBGene00006153	str-96	36.1182	3.06628	0.363983	8.42424	3.63113e-17	1.67078e-15	chrV	15292490	15293965	-	WBGene00038018	Cbr-str-96.1	TRUE	FALSE	FALSE	1.12
WBGene00020914	sulp-6	19.4109	1.32755	0.363125	3.65592	0.000256263	0.00132236	chrI	3287336	3293127	+	WBGene00035342	Cbr-sulp-6	FALSE	FALSE	TRUE	-2.2
WBGene00016922	swt-2	7.11633	1.81111	0.404438	4.47808	7.53158e-06	5.83458e-05	chrV	7530140	7531463	+	NaN	NaN	FALSE	FALSE	FALSE	-2.69
WBGene00006379	sys-1	370.303	1.00647	0.12571	8.00624	1.18265e-15	4.55768e-14	chrI	9980064	9984848	-	WBGene00026600	Cbr-sys-1	FALSE	FALSE	FALSE	-2.15
WBGene00011378	T02E1.6	16.846	2.03155	0.393015	5.16914	2.35169e-07	2.58008e-06	chrI	8210931	8212411	+	WBGene00026888	CBG04161	FALSE	FALSE	TRUE	-2.04
WBGene00011379	T02E1.7	13.1245	1.93055	0.39854	4.84404	1.27224e-06	1.18511e-05	chrI	8208712	8210703	-	WBGene00026887	CBG04160	FALSE	FALSE	FALSE	-2.13
WBGene00011425	T04B2.7	21.1336	2.04099	0.359891	5.67113	1.41858e-08	1.96015e-07	chrIV	10054036	10056250	-	NaN	NaN	FALSE	FALSE	FALSE	-2.1
WBGene00020212	T04D1.2	49.5144	1.57101	0.279966	5.61145	2.00641e-08	2.69692e-07	chrI	4679671	4682755	+	WBGene00039289	CBG20260	FALSE	FALSE	FALSE	-2.14
WBGene00011431	T04D3.1	27.0886	1.35087	0.333406	4.05173	5.0841e-05	0.000321577	chrI	13302759	13304311	-	NaN	NaN	FALSE	FALSE	FALSE	-2.14
WBGene00020227	T05A8.1	5.40225	1.43152	0.396343	3.61181	0.000304066	0.00152677	chrII	2708438	2710096	-	WBGene00026106	CBG03198	FALSE	FALSE	FALSE	-1.43
WBGene00020228	T05A8.2	4.37226	1.23545	0.388413	3.18077	0.00146882	0.00596377	chrII	2709942	2711019	-	NaN	NaN	FALSE	FALSE	FALSE	-1.51
WBGene00011475	T05D4.2	16.7925	1.97946	0.381567	5.1877	2.12903e-07	2.35846e-06	chrIII	13561729	13563082	-	NaN	NaN	FALSE	FALSE	FALSE	-2.15
WBGene00011489	T05F1.2	227.989	1.35953	0.177587	7.65558	1.92447e-14	6.48604e-13	chrI	9622522	9624724	+	WBGene00026510	CBG03708	FALSE	FALSE	FALSE	-2.16
WBGene00011493	T05F1.8	17.2347	1.36506	0.364554	3.74445	0.000180787	0.000975612	chrI	9642344	9643804	+	WBGene00026547	CBG03753	FALSE	TRUE	FALSE	-1.88
WBGene00011494	T05F1.9	165.562	1.31174	0.183701	7.14061	9.29191e-13	2.54476e-11	chrI	9645699	9647676	+	WBGene00026548	CBG03754	FALSE	FALSE	FALSE	-1.89
WBGene00020270	T05H4.7	47.6262	1.65034	0.30091	5.4845	4.1463e-08	5.27441e-07	chrV	6414993	6417494	+	WBGene00038227	CBG18928	FALSE	FALSE	FALSE	-0.71
WBGene00020289	T06C10.3	16.2737	1.37313	0.371983	3.69138	0.000223037	0.00117109	chrIV	7870865	7873034	+	NaN	NaN	FALSE	FALSE	FALSE	-2.07
WBGene00011533	T06E4.5	23.8337	1.44168	0.363007	3.97149	7.14242e-05	0.000431593	chrV	9631244	9632256	+	WBGene00088610	CBG27196	FALSE	FALSE	FALSE	-2.12
WBGene00011544	T06E8.2	37.053	3.35155	0.356315	9.40613	5.1473e-21	3.4316e-19	chrV	10035746	10036413	-	NaN	NaN	FALSE	FALSE	FALSE	-2.33
WBGene00045475	T07A5.7	16.2179	1.61883	0.384933	4.20548	2.60526e-05	0.000177311	chrIII	10306756	10311100	-	WBGene00042683	CBG24613	FALSE	FALSE	FALSE	-1.56
WBGene00020353	T08B6.4	6.9338	1.56913	0.405268	3.87183	0.000108022	0.000618766	chrIV	4905658	4908498	+	WBGene00030285	CBG08508	FALSE	FALSE	TRUE	-1.45
WBGene00044684	T08G11.2	9.22644	1.41031	0.404033	3.49058	0.000481975	0.00227265	chrI	8919329	8920516	-	WBGene00026785	CBG04039	FALSE	FALSE	FALSE	-2.03
WBGene00011624	T08G5.3	16.5594	1.17309	0.373746	3.13872	0.00169685	0.00674128	chrV	14026336	14027484	-	WBGene00027384	CBG04773	FALSE	FALSE	FALSE	-1.94
WBGene00011626	T08G5.7	12.2447	1.80809	0.396905	4.55547	5.22674e-06	4.20417e-05	chrV	14044374	14045217	+	NaN	NaN	FALSE	FALSE	FALSE	-1.96
WBGene00020381	T09B4.7	38.169	2.8595	0.329561	8.6767	4.0741e-18	2.10826e-16	chrI	6160054	6161665	-	WBGene00033757	CBG12889	FALSE	FALSE	FALSE	-2.18
WBGene00011642	T09B9.1	77.2274	1.69853	0.297862	5.70242	1.1812e-08	1.65843e-07	chrX	9757271	9759306	+	WBGene00036094	CBG16012	FALSE	TRUE	TRUE	-2.01
WBGene00011659	T09E11.10	7.05218	1.3291	0.399389	3.32784	0.000875233	0.00381754	chrI	12345819	12347265	-	NaN	NaN	FALSE	FALSE	FALSE	-2.51
WBGene00011658	T09E11.9	4.33978	1.18726	0.385267	3.08166	0.00205847	0.00794972	chrI	12347700	12349819	-	NaN	NaN	FALSE	FALSE	FALSE	-2.44
WBGene00011669	T09F5.10	30.7242	1.64099	0.331474	4.95057	7.39956e-07	7.26318e-06	chrV	15180057	15181785	+	NaN	NaN	TRUE	TRUE	FALSE	-2.55
WBGene00020400	T10B11.4	14.3651	1.79363	0.383722	4.67429	2.94972e-06	2.52259e-05	chrI	6937504	6939618	-	NaN	NaN	FALSE	FALSE	FALSE	-2.21
WBGene00020394	T10B5.8	151.865	1.36012	0.206926	6.573	4.93098e-11	1.03296e-09	chrV	1842044	1844807	+	WBGene00270710	CBG30656	FALSE	FALSE	FALSE	-2.32
WBGene00011691	T10C6.10	105.93	1.84476	0.224398	8.22093	2.01929e-16	8.63848e-15	chrV	16036413	16038293	+	WBGene00031964	CBG10639	FALSE	TRUE	FALSE	-0.94
WBGene00020414	T10E9.4	8.96178	2.09764	0.405573	5.17204	2.31557e-07	2.54657e-06	chrI	6525045	6528689	+	WBGene00033586	CBG12671	FALSE	FALSE	TRUE	-2.18
WBGene00020439	T12A2.5	5.83786	1.32227	0.402089	3.28851	0.0010072	0.00431761	chrIII	6233718	6239336	-	WBGene00037100	CBG17492	FALSE	FALSE	FALSE	-1.84
WBGene00020440	T12A2.6	11.7413	1.70351	0.40478	4.20848	2.57092e-05	0.00017517	chrIII	6241850	6244383	-	WBGene00037097	CBG17488	FALSE	FALSE	FALSE	-1.61
WBGene00185100	T12A7.9	4.16996	1.28387	0.382315	3.35814	0.000784676	0.00347736	chrIV	11755274	11755970	-	WBGene00030245	CBG08460	FALSE	TRUE	FALSE	-2.26
WBGene00011777	T14G10.8	52.2859	1.74807	0.266757	6.55303	5.63813e-11	1.16112e-09	chrIV	10146226	10147105	-	WBGene00270574	CBG30422	FALSE	FALSE	FALSE	-1.84
WBGene00011770	T14G8.2	49.9464	1.13293	0.284669	3.97983	6.89656e-05	0.000419931	chrX	12858019	12859541	+	NaN	NaN	FALSE	FALSE	FALSE	-1.45
WBGene00020526	T15B7.14	19.0273	2.94864	0.391826	7.5254	5.25603e-14	1.67268e-12	chrV	6832290	6835342	-	WBGene00088562	CBG27148	FALSE	FALSE	FALSE	-1.38
WBGene00020520	T15B7.8	14.4125	1.74141	0.39673	4.38941	1.13657e-05	8.4397e-05	chrV	6821809	6826872	+	NaN	NaN	FALSE	FALSE	FALSE	-1.91
WBGene00011789	T15H9.4	7.04548	1.58991	0.405393	3.9219	8.78541e-05	0.000518158	chrII	9611873	9613403	+	WBGene00024308	CBG01013	FALSE	FALSE	FALSE	-1.5
WBGene00011791	T15H9.6	18.2065	1.57747	0.367219	4.29571	1.74133e-05	0.000123818	chrII	9607533	9609396	-	NaN	NaN	FALSE	FALSE	FALSE	-1.5
WBGene00011799	T16G1.5	138.425	1.17882	0.214118	5.50547	3.68184e-08	4.71973e-07	chrV	12937654	12939506	-	WBGene00031068	CBG09500	FALSE	FALSE	FALSE	-2.01
WBGene00011810	T16G12.9	6.38577	1.34078	0.404037	3.31845	0.000905171	0.00393591	chrIII	10076387	10078707	-	WBGene00031403	CBG09892	FALSE	TRUE	FALSE	-1.59
WBGene00020580	T19D12.5	35.119	1.44079	0.307237	4.68951	2.73855e-06	2.3542e-05	chrII	6634902	6636163	-	WBGene00027028	CBG04327	FALSE	FALSE	FALSE	-1.69
WBGene00044282	T19H12.12	7.53583	1.35709	0.403193	3.36587	0.000763024	0.00339375	chrV	4884790	4885420	+	WBGene00030445	CBG08698	FALSE	FALSE	FALSE	-1.78
WBGene00020598	T20B6.2	5.29331	1.30853	0.397799	3.28943	0.00100391	0.00430781	chrIII	2893433	2897183	+	WBGene00035485	CBG15158	FALSE	FALSE	FALSE	-1.34
WBGene00020616	T20D4.10	287.579	1.77648	0.240234	7.39479	1.41634e-13	4.31204e-12	chrV	3400252	3401063	+	WBGene00024112	CBG00775	FALSE	FALSE	FALSE	-2.12
WBGene00020618	T20D4.12	112.938	2.44907	0.292735	8.36616	5.95249e-17	2.6848e-15	chrV	3397065	3397800	+	WBGene00024112	CBG00775	FALSE	FALSE	FALSE	-1.93
WBGene00020627	T20F5.5	19.8135	1.71293	0.368735	4.64541	3.39394e-06	2.85701e-05	chrI	3917911	3920172	-	WBGene00270338	CBG29910	FALSE	FALSE	FALSE	-2.1
WBGene00011873	T20G5.12	12.5982	1.40072	0.402847	3.47704	0.000506973	0.00237885	chrIII	10201623	10202528	+	WBGene00031325	CBG09805	FALSE	TRUE	FALSE	-1.37
WBGene00011874	T20G5.13	12.6236	1.6523	0.401797	4.11227	3.9178e-05	0.000254775	chrIII	10199894	10201326	-	WBGene00031324	CBG09804	FALSE	TRUE	FALSE	-1.37
WBGene00011895	T21C9.9	280.332	1.23785	0.184572	6.70662	1.99183e-11	4.44803e-10	chrV	10590548	10592653	-	WBGene00031209	CBG09651	FALSE	FALSE	FALSE	-1.97
WBGene00020650	T21D12.11	46.6888	2.19712	0.301623	7.28431	3.23329e-13	9.45e-12	chrIV	269407	272099	+	NaN	NaN	FALSE	FALSE	FALSE	-1.78
WBGene00020648	T21D12.7	78.3127	1.63776	0.279312	5.86354	4.53104e-09	6.86865e-08	chrIV	288803	291456	-	WBGene00034259	CBG13502	FALSE	FALSE	FALSE	-1.78
WBGene00020655	T21E12.3	7.32884	1.42354	0.402143	3.53989	0.000400301	0.00193498	chrI	4401956	4404585	+	WBGene00086724	CBG25310	FALSE	FALSE	FALSE	-2.13
WBGene00020659	T21G5.1	11.9126	1.86164	0.398351	4.67338	2.96284e-06	2.53144e-05	chrI	6874304	6876928	+	WBGene00034252	CBG13495	FALSE	FALSE	TRUE	-2.31
WBGene00020664	T21H3.5	26.5994	1.78406	0.371309	4.80479	1.54912e-06	1.41066e-05	chrV	1158251	1164293	-	WBGene00024378	CBG01096	FALSE	FALSE	FALSE	-1.56
WBGene00011909	T22A3.6	9.41949	2.14373	0.405268	5.28965	1.22553e-07	1.42138e-06	chrI	10595545	10598490	+	WBGene00042475	CBG24340	FALSE	FALSE	FALSE	-2.36
WBGene00020675	T22B11.1	42.6915	1.9581	0.298761	6.55406	5.59932e-11	1.15443e-09	chrIV	4692793	4696826	+	WBGene00024925	CBG01736	FALSE	FALSE	FALSE	-2.1
WBGene00020665	T22B2.1	14.3993	2.01896	0.400939	5.03557	4.76426e-07	4.93921e-06	chrX	3926081	3929576	+	WBGene00037921	CBG18518	FALSE	FALSE	FALSE	-2.24
WBGene00020667	T22B2.3	9.22755	1.90617	0.404596	4.71129	2.46149e-06	2.13809e-05	chrX	3917301	3919835	+	NaN	NaN	FALSE	TRUE	FALSE	-2.04
WBGene00020669	T22B2.5	9.70401	1.87187	0.401391	4.66345	3.10952e-06	2.64193e-05	chrX	3908144	3911380	-	NaN	NaN	FALSE	FALSE	FALSE	-2.1
WBGene00011918	T22C1.8	20.6988	2.61296	0.379329	6.88836	5.64375e-12	1.37331e-10	chrI	7955977	7958505	-	WBGene00023770	CBG00373	FALSE	FALSE	TRUE	-2.01
WBGene00011919	T22C1.9	6.22688	1.49882	0.402536	3.72345	0.000196519	0.00104812	chrI	7958647	7960158	+	WBGene00030045	CBG08203	FALSE	FALSE	FALSE	-1.84
WBGene00020713	T23B3.5	4.10442	1.25931	0.380676	3.3081	0.000939326	0.00406989	chrI	6705546	6706422	-	WBGene00033676	CBG12784	FALSE	TRUE	FALSE	-2.16
WBGene00219297	T23F11.11	5.17989	1.21175	0.399317	3.03456	0.0024089	0.00908036	chrIII	4669921	4671591	-	NaN	NaN	FALSE	FALSE	FALSE	-1.43
WBGene00011957	T23F11.6	29.9719	1.46086	0.338612	4.31428	1.60127e-05	0.000114933	chrIII	4646507	4647854	-	WBGene00271082	CBG30214	FALSE	FALSE	FALSE	-2.26
WBGene00011949	T23F6.1	13.2557	1.46982	0.391417	3.75512	0.00017326	0.000940826	chrIV	12719960	12720997	+	WBGene00026351	CBG03490	FALSE	TRUE	FALSE	-1.71
WBGene00011951	T23F6.3	5.40755	1.44488	0.393754	3.66949	0.000243038	0.00126664	chrIV	12723103	12724651	-	WBGene00026606	Cbr-har-2	FALSE	TRUE	FALSE	-2.07
WBGene00011968	T23G11.1	61.5752	1.11025	0.285149	3.89356	9.87835e-05	0.000575041	chrI	7701365	7702053	-	WBGene00023712	CBG00302	FALSE	FALSE	FALSE	-2.06
WBGene00011973	T23G11.10	13.0456	1.91941	0.401941	4.77536	1.79386e-06	1.60315e-05	chrI	7698301	7699037	+	WBGene00038539	CBG19293	FALSE	FALSE	FALSE	-1.92
WBGene00020758	T24C4.2	55.1423	1.70742	0.265153	6.43938	1.19961e-10	2.35374e-09	chrIII	867512	869987	-	WBGene00042361	CBG24193	FALSE	FALSE	FALSE	-1.62
WBGene00020760	T24C4.4	119.063	1.09211	0.204941	5.32887	9.88238e-08	1.16842e-06	chrIII	872622	873531	-	WBGene00042363	CBG24195	FALSE	FALSE	TRUE	-1.72
WBGene00020761	T24C4.5	173.657	2.13556	0.192088	11.1176	1.02987e-28	1.12651e-26	chrIII	877435	879734	-	WBGene00031515	Cbr-pri-1	FALSE	TRUE	FALSE	-1.42
WBGene00020774	T24E12.5	320.928	1.29222	0.215225	6.00404	1.92472e-09	3.12801e-08	chrII	3753921	3757428	+	WBGene00026106	CBG03198	FALSE	FALSE	FALSE	-0.25
WBGene00012008	T25B9.2	7.30533	1.81139	0.404391	4.47931	7.48857e-06	5.80618e-05	chrIV	10750512	10751762	-	WBGene00030142	CBG08329	FALSE	FALSE	FALSE	-2.34
WBGene00012010	T25B9.4	17.7091	2.62521	0.38543	6.81112	9.6839e-12	2.28843e-10	chrIV	10755760	10757716	-	WBGene00031481	CBG09992	FALSE	FALSE	TRUE	-2.26
WBGene00012012	T25B9.6	18.3099	2.80125	0.389574	7.19056	6.45279e-13	1.8051e-11	chrIV	10758126	10760795	+	WBGene00030857	CBG09230	FALSE	FALSE	FALSE	-2.26
WBGene00012017	T25C8.1	79.7662	1.29195	0.229824	5.62149	1.8932e-08	2.56171e-07	chrIII	13608072	13614704	+	WBGene00037706	CBG18255	FALSE	FALSE	FALSE	-1.69
WBGene00020795	T25D1.3	146.065	1.10073	0.1875	5.87055	4.34355e-09	6.62301e-08	chrX	16505248	16507411	+	NaN	NaN	TRUE	FALSE	FALSE	-1.03
WBGene00020799	T25D10.1	550.136	1.43307	0.178712	8.01888	1.06716e-15	4.13883e-14	chrII	6403401	6405040	+	WBGene00025665	CBG02648	FALSE	TRUE	FALSE	-1.86
WBGene00020832	T26C12.2	13.8658	1.70686	0.393809	4.33424	1.46264e-05	0.000106066	chrIV	3263851	3265372	-	WBGene00026249	CBG03379	FALSE	TRUE	FALSE	0.19
WBGene00044206	T26H5.9	82.4998	1.02113	0.298711	3.41845	0.000629795	0.00287181	chrV	15444916	15445420	+	NaN	NaN	FALSE	TRUE	FALSE	-2.28
WBGene00020841	T27A3.5	12.2161	2.49651	0.404938	6.16517	7.04057e-10	1.22837e-08	chrI	6100261	6101789	-	WBGene00039302	CBG20279	FALSE	FALSE	FALSE	-2.32
WBGene00194848	T27D12.6	11.2344	1.66549	0.395838	4.20751	2.58205e-05	0.000175863	chrII	11835634	11837523	+	NaN	NaN	FALSE	FALSE	FALSE	-0.69
WBGene00020861	T27E4.1	4175.37	4.88095	0.16015	30.4774	5.19754e-204	1.18679e-200	chrV	9092345	9094345	+	WBGene00038451	CBG19188	FALSE	TRUE	FALSE	-2.2
WBGene00020863	T27E4.5	31.8795	2.88084	0.346135	8.32288	8.58535e-17	3.82509e-15	chrV	9068368	9069694	-	WBGene00088592	CBG27178	FALSE	TRUE	FALSE	-2.34
WBGene00012096	T27E9.6	9.66908	1.59847	0.401013	3.98607	6.71757e-05	0.000410264	chrIII	13475406	13476107	-	NaN	NaN	FALSE	FALSE	FALSE	-2.12
WBGene00020870	T28A11.3	7.70872	1.28267	0.405244	3.16518	0.0015499	0.00624712	chrV	3275333	3276110	+	WBGene00024112	CBG00775	FALSE	FALSE	FALSE	-2.44
WBGene00012115	T28B8.4	30.2379	1.57105	0.321174	4.89158	1.00032e-06	9.54614e-06	chrI	8160512	8168643	+	WBGene00026637	CBG03866	FALSE	TRUE	FALSE	-2.24
WBGene00044122	T28B8.6	6.20952	1.26049	0.385558	3.26926	0.0010783	0.00456696	chrI	8150331	8151368	+	WBGene00038661	CBG19439	FALSE	FALSE	FALSE	-2.11
WBGene00012120	T28C6.5	38.6807	2.37063	0.329545	7.19365	6.30799e-13	1.7673e-11	chrIV	8821447	8822874	+	WBGene00026377	CBG03528	FALSE	FALSE	FALSE	-1.73
WBGene00020898	T28D9.9	16.9405	1.75828	0.382535	4.59638	4.29899e-06	3.52467e-05	chrII	6483953	6484967	-	WBGene00025680	CBG02668	FALSE	FALSE	FALSE	-2.08
WBGene00020904	T28F12.1	44.1769	1.84708	0.316859	5.82935	5.56421e-09	8.2905e-08	chrV	4513033	4516947	+	WBGene00041913	CBG23595	FALSE	FALSE	FALSE	-2.16
WBGene00012138	T28F4.3	34.8174	2.37315	0.33741	7.03343	2.01522e-12	5.25887e-11	chrI	7484159	7486302	-	WBGene00024251	CBG00946	FALSE	FALSE	TRUE	-2.07
WBGene00012140	T28F4.5	4153.4	1.1169	0.322168	3.46682	0.000526645	0.00245722	chrI	7491816	7492934	+	WBGene00032911	CBG11869	FALSE	FALSE	TRUE	-2
WBGene00006385	taf-4	1307.97	1.30651	0.341131	3.82994	0.000128177	0.000719104	chrI	382648	388564	+	WBGene00040741	Cbr-taf-4	FALSE	FALSE	FALSE	-1.01
WBGene00008231	tag-329	40.1149	2.98485	0.358925	8.31608	9.09188e-17	4.0311e-15	chrV	9534926	9536404	+	WBGene00038544	CBG19298	FALSE	TRUE	TRUE	-2.27
WBGene00009628	tatn-1	4632.78	1.72903	0.171039	10.109	5.03807e-24	4.28049e-22	chrX	14791008	14792980	+	WBGene00029584	Cbr-tatn-1	FALSE	FALSE	FALSE	-1.88
WBGene00013196	tbc-20	2002.57	3.39673	0.11411	29.7672	1.04025e-194	1.90023e-191	chrII	14798472	14800971	+	WBGene00026960	Cbr-tbc-20	FALSE	FALSE	FALSE	-1.16
WBGene00006555	tbx-36	34.4525	2.58115	0.346906	7.44049	1.00316e-13	3.10589e-12	chrIV	11950570	11952208	+	NaN	NaN	FALSE	FALSE	FALSE	-1.59
WBGene00008643	tmem-138	8.39829	1.26125	0.403253	3.1277	0.00176177	0.00695581	chrII	8157362	8158045	+	WBGene00024083	Cbr-tmem-138	FALSE	TRUE	FALSE	-1.47
WBGene00006611	tre-5	514.023	1.64634	0.187221	8.79359	1.44849e-18	7.75941e-17	chrII	53013	55304	-	WBGene00029175	Cbr-tre-5	FALSE	FALSE	TRUE	-2.09
WBGene00006612	trf-1	25.6931	2.20116	0.368388	5.97511	2.29941e-09	3.68661e-08	chrIII	13430462	13433394	+	WBGene00040060	Cbr-trf-1	FALSE	FALSE	FALSE	-1.9
WBGene00004149	trpl-5	9.44319	1.30824	0.404152	3.23699	0.00120797	0.00503614	chrII	2086719	2090618	-	WBGene00024847	CBG01638	FALSE	FALSE	FALSE	-1.71
WBGene00006623	try-5	41.6788	2.3523	0.357681	6.57652	4.816e-11	1.01003e-09	chrV	9345772	9348687	+	WBGene00038513	Cbr-try-5	FALSE	FALSE	TRUE	-2.27
WBGene00006624	try-6	88.1897	2.54917	0.254511	10.0159	1.29721e-23	1.06739e-21	chrI	6585039	6587882	+	WBGene00033569	Cbr-try-6	FALSE	FALSE	TRUE	-2.23
WBGene00023425	try-9	38.2709	2.87942	0.337728	8.52587	1.5167e-17	7.3685e-16	chrII	4368490	4369692	+	WBGene00026483	Cbr-try-9	FALSE	TRUE	FALSE	-1.13
WBGene00006627	tsp-1	43.0802	1.2967	0.288421	4.49586	6.92887e-06	5.40203e-05	chrIII	8237995	8239423	-	WBGene00041947	Cbr-tsp-1	FALSE	FALSE	TRUE	-1.94
WBGene00006644	tsp-18	9.25704	1.88213	0.405528	4.6412	3.46396e-06	2.91327e-05	chrII	5904552	5906308	+	WBGene00087046	Cbr-tsp-18	FALSE	TRUE	FALSE	-1.57
WBGene00006628	tsp-2	35.5632	1.12506	0.306732	3.66791	0.000244543	0.00127267	chrIII	8236984	8237881	-	NaN	NaN	FALSE	FALSE	FALSE	-1.96
WBGene00012169	ttbk-4	6.54598	1.56607	0.403624	3.88003	0.000104443	0.00060071	chrIV	10073404	10075166	-	WBGene00036491	Cbr-ttbk-4	FALSE	FALSE	TRUE	-2.04
WBGene00008405	ttll-12	22940.9	3.64804	0.152511	23.9198	1.9048e-126	1.83131e-123	chrII	9338890	9341394	+	WBGene00039260	Cbr-ttll-12	FALSE	TRUE	FALSE	-1.85
WBGene00011460	ttr-14	38.3908	3.40098	0.353583	9.61864	6.67069e-22	4.74138e-20	chrX	10787503	10789700	+	WBGene00037176	Cbr-ttr-14	FALSE	FALSE	TRUE	-1.61
WBGene00007535	ttr-19	4.90535	1.25997	0.379512	3.31998	0.000900249	0.00391544	chrV	10226885	10227434	-	WBGene00031118	Cbr-ttr-19	FALSE	TRUE	FALSE	-2.13
WBGene00045245	ttr-34	11.3179	1.33733	0.395501	3.38135	0.000721309	0.00323898	chrX	13139847	13140886	+	WBGene00271378	Cbr-ttr-34	FALSE	FALSE	FALSE	-1.87
WBGene00010234	ttr-50	19.8541	2.08053	0.363793	5.71899	1.07157e-08	1.51505e-07	chrIV	11640047	11641015	-	WBGene00028436	Cbr-ttr-50	FALSE	FALSE	FALSE	-2.23
WBGene00007888	ttr-9	7.27017	1.87215	0.40251	4.65118	3.30033e-06	2.78334e-05	chrIV	9505615	9506326	-	WBGene00043000	Cbr-ttr-9	FALSE	FALSE	FALSE	-2.05
WBGene00006684	twk-32	177.679	1.4055	0.179011	7.8515	4.11089e-15	1.50488e-13	chrV	13796641	13800577	+	WBGene00032591	Cbr-twk-32	FALSE	FALSE	FALSE	-1.8
WBGene00006689	twk-37	9.22611	1.6776	0.396408	4.232	2.31623e-05	0.000159617	chrI	6269561	6271541	-	WBGene00033509	Cbr-twk-37	FALSE	FALSE	FALSE	-2.13
WBGene00006695	twk-45	14.9922	1.18631	0.383911	3.09006	0.00200119	0.00776624	chrIII	2793323	2801900	-	NaN	NaN	FALSE	FALSE	FALSE	-0.74
WBGene00006661	twk-6	10.451	2.09722	0.40559	5.17079	2.33102e-07	2.56048e-06	chrIII	4742968	4744649	+	WBGene00037669	CBG18207	FALSE	TRUE	FALSE	-1.84
WBGene00021553	tyr-5	20.921	1.7934	0.375046	4.78182	1.73712e-06	1.56084e-05	chrI	3259871	3264254	+	WBGene00035349	Cbr-tyr-5	FALSE	FALSE	TRUE	-1.95
WBGene00006700	uba-2	3442.37	1.72863	0.10668	16.2039	4.73498e-59	1.37292e-56	chrI	12741588	12749318	+	WBGene00034348	Cbr-uba-2	FALSE	FALSE	FALSE	-2.09
WBGene00011336	ubxn-5	11.7459	2.06635	0.402145	5.13833	2.77186e-07	3.00318e-06	chrII	10233833	10234498	-	WBGene00038086	Cbr-ubxn-5	FALSE	FALSE	FALSE	-1.83
WBGene00009178	uggt-2	2474.08	5.86664	0.155641	37.6935	0	0	chrI	9317736	9327279	+	NaN	NaN	FALSE	TRUE	FALSE	-2.12
WBGene00020594	ugt-10	58.5231	1.02949	0.28793	3.5755	0.000349555	0.00172028	chrV	4898217	4900082	-	WBGene00030579	CBG08858	FALSE	FALSE	FALSE	-2.09
WBGene00019233	ugt-14	198.075	2.68799	0.271203	9.91134	3.71634e-23	2.87655e-21	chrV	4906253	4908258	+	WBGene00030579	CBG08858	FALSE	TRUE	FALSE	-1.98
WBGene00044286	ugt-35	8.64328	1.87705	0.405604	4.62779	3.69593e-06	3.07719e-05	chrV	10651995	10654265	-	NaN	NaN	FALSE	FALSE	FALSE	-2.17
WBGene00017333	ugt-38	13.4361	1.89549	0.404679	4.68393	2.8143e-06	2.41583e-05	chrV	7145656	7147470	-	WBGene00036849	CBG17093	FALSE	FALSE	FALSE	-2.57
WBGene00008485	ugt-43	43.7413	1.26726	0.305613	4.14662	3.37425e-05	0.000223193	chrIV	10464588	10467240	+	WBGene00030188	Cbr-ugt-43	FALSE	FALSE	FALSE	-2.06
WBGene00008486	ugt-44	1890.54	2.08575	0.159969	13.0385	7.38968e-39	1.28559e-36	chrIV	10469741	10471899	+	WBGene00030189	Cbr-ugt-44	FALSE	FALSE	TRUE	-2.15
WBGene00006760	unc-23	8588.86	1.73362	0.253565	6.83699	8.08768e-12	1.92869e-10	chrV	8936359	8939676	+	WBGene00038405	Cbr-unc-23	FALSE	FALSE	TRUE	-2.16
WBGene00011462	vap-2	30.8895	1.94946	0.341754	5.70427	1.16839e-08	1.64304e-07	chrX	10789628	10792535	-	WBGene00037175	Cbr-vap-2	FALSE	FALSE	TRUE	-1.46
WBGene00016453	vet-2	47.9517	2.10013	0.285397	7.35862	1.85818e-13	5.59198e-12	chrI	10846777	10850103	+	NaN	NaN	FALSE	FALSE	FALSE	-2.16
WBGene00006902	vet-6	10.5595	1.62613	0.405124	4.0139	5.97247e-05	0.000370833	chrI	13269984	13272784	+	NaN	NaN	FALSE	TRUE	FALSE	-2.07
WBGene00006925	vit-1	42.973	1.92253	0.314736	6.10839	1.00639e-09	1.70693e-08	chrX	7727889	7733168	+	WBGene00000365	CBG16767	FALSE	FALSE	FALSE	-1.85
WBGene00006926	vit-2	21.9329	2.22803	0.397439	5.60595	2.07112e-08	2.77776e-07	chrX	5101032	5106173	+	WBGene00000365	CBG16767	FALSE	FALSE	FALSE	-2
WBGene00006927	vit-3	11.2063	1.90689	0.401623	4.74797	2.05473e-06	1.81235e-05	chrX	3567355	3572549	-	WBGene00034777	CBG14203	FALSE	FALSE	TRUE	-2.11
WBGene00006929	vit-5	12.018	2.00834	0.4006	5.01333	5.34967e-07	5.47158e-06	chrX	3403471	3408603	+	WBGene00034777	CBG14203	FALSE	FALSE	FALSE	-2.28
WBGene00012159	VY10G11R.1	6.02864	1.57672	0.394987	3.99183	6.55642e-05	0.0004019	chrIV	16469580	16470881	-	NaN	NaN	FALSE	FALSE	FALSE	-1.4
WBGene00020912	W01A11.7	110.348	1.69534	0.261108	6.49286	8.42234e-11	1.68327e-09	chrV	6504538	6505500	-	WBGene00038248	CBG18952	FALSE	FALSE	TRUE	-1.95
WBGene00012172	W01B6.5	6.84452	1.45059	0.403499	3.59503	0.000324358	0.00161653	chrIV	10076325	10078705	+	WBGene00026394	CBG03551	FALSE	FALSE	FALSE	-2.03
WBGene00012180	W01D2.3	195.346	4.30956	0.233713	18.4396	6.32366e-76	2.81742e-73	chrII	14800918	14804309	-	WBGene00026973	CBG04260	FALSE	FALSE	FALSE	-1.12
WBGene00012207	W02B12.12	5.80975	1.19227	0.39043	3.05372	0.00226023	0.00861775	chrII	11476757	11479176	-	WBGene00270478	CBG30154	FALSE	TRUE	FALSE	-1.33
WBGene00020927	W02B3.7	7.60281	1.24988	0.404893	3.08693	0.00202233	0.00783331	chrIII	686237	692033	-	WBGene00035560	CBG15246	FALSE	FALSE	FALSE	-1.17
WBGene00012219	W03C9.1	26.2416	2.4036	0.352646	6.81591	9.36662e-12	2.21632e-10	chrII	11960989	11962128	-	WBGene00039768	CBG20856	FALSE	TRUE	TRUE	-1.07
WBGene00020988	W03D8.7	6.73017	1.63737	0.404372	4.04916	5.1401e-05	0.000324669	chrI	2796130	2797238	+	WBGene00026841	CBG04101	FALSE	FALSE	FALSE	-2.09
WBGene00021007	W03F11.4	10.6462	1.96886	0.405148	4.85961	1.17619e-06	1.10295e-05	chrI	2235617	2241210	-	WBGene00035485	CBG15158	FALSE	TRUE	FALSE	-1.9
WBGene00020999	W03F9.1	6233.45	1.84096	0.113131	16.2728	1.53983e-59	4.61116e-57	chrV	124010	126758	-	WBGene00028719	CBG06449	FALSE	FALSE	TRUE	-2.29
WBGene00021011	W03G1.5	219.286	1.20028	0.169241	7.09214	1.32056e-12	3.52672e-11	chrIV	505069	506600	-	WBGene00024830	CBG01616	FALSE	FALSE	FALSE	-1.51
WBGene00195155	W04A8.9	20.8846	1.06137	0.348618	3.04452	0.00233055	0.0088373	chrI	13853079	13853727	+	NaN	NaN	FALSE	FALSE	FALSE	-1.93
WBGene00012268	W04G5.8	25.5432	1.57374	0.339553	4.63476	3.57354e-06	2.99165e-05	chrI	11649982	11651912	+	NaN	NaN	FALSE	FALSE	FALSE	-1.63
WBGene00012281	W05E10.2	49.1807	1.17499	0.303434	3.87231	0.00010781	0.000617939	chrV	11687426	11689174	+	WBGene00041669	CBG23286	FALSE	TRUE	FALSE	-2.15
WBGene00012307	W06F12.3	15.2728	1.22295	0.376207	3.25074	0.00115103	0.00483465	chrIII	13735071	13736541	+	WBGene00037736	CBG18289	FALSE	FALSE	FALSE	-1.91
WBGene00021072	W07B8.4	153.765	3.41075	0.247852	13.7612	4.362e-43	9.05462e-41	chrV	1130088	1131942	-	WBGene00024384	CBG01104	FALSE	FALSE	TRUE	-2.41
WBGene00012334	W07G1.7	6.66338	1.72613	0.403368	4.2793	1.87483e-05	0.000132077	chrII	13964891	13966333	-	WBGene00039669	CBG20742	FALSE	FALSE	FALSE	-0.68
WBGene00012335	W07G4.1	4.65236	1.19337	0.385169	3.09829	0.00194639	0.00758097	chrV	13033529	13034164	+	NaN	NaN	FALSE	FALSE	FALSE	-2.3
WBGene00077788	W07G4.8	6.27592	1.22309	0.401742	3.04447	0.00233094	0.0088373	chrV	13049244	13049453	-	WBGene00271674	CBG31009	FALSE	FALSE	FALSE	-2.47
WBGene00021121	W09G12.7	116.565	1.09727	0.281889	3.89256	9.91912e-05	0.000576679	chrIV	1229080	1230789	+	WBGene00035586	CBG15274	FALSE	FALSE	FALSE	-0.9
WBGene00021122	W09G12.8	3.82337	1.17911	0.375545	3.13973	0.00169102	0.00671959	chrIV	1226182	1227668	+	NaN	NaN	FALSE	FALSE	FALSE	-1
WBGene00044160	W10C6.2	4.24041	1.26966	0.381298	3.32985	0.00086894	0.00379605	chrII	11120882	11121900	-	NaN	NaN	FALSE	FALSE	FALSE	-1.88
WBGene00020707	wago-10	9.41383	1.83443	0.404224	4.53815	5.67487e-06	4.52281e-05	chrV	343428	347623	+	WBGene00024628	Cbr-hrde-1	FALSE	FALSE	FALSE	-2.34
WBGene00022877	wago-5	62.2457	1.96689	0.299764	6.56146	5.32818e-11	1.10602e-09	chrII	5812375	5815482	-	WBGene00033283	Cbr-wago-1	FALSE	FALSE	FALSE	-1.88
WBGene00006938	wee-1.1	14.8848	1.35358	0.381887	3.54446	0.000393426	0.00190629	chrII	9581756	9583548	-	WBGene00039447	CBG20472	FALSE	TRUE	FALSE	-1.19
WBGene00007631	wht-3	125.257	3.01358	0.227096	13.2701	3.4521e-40	6.18231e-38	chrIII	4147425	4151598	-	WBGene00039224	Cbr-wht-3	FALSE	FALSE	TRUE	-2.13
WBGene00017179	wht-4	15.0618	2.68058	0.396437	6.76168	1.36404e-11	3.11462e-10	chrII	3278987	3281686	+	WBGene00027033	Cbr-wht-4	FALSE	FALSE	FALSE	-1.67
WBGene00007060	wht-6	11.6856	1.75678	0.401372	4.37694	1.20357e-05	8.88664e-05	chrIII	6471720	6475246	+	WBGene00038860	Cbr-wht-6	FALSE	FALSE	TRUE	-1.45
WBGene00044265	Y105E8B.11	10.2627	1.81224	0.40531	4.47124	7.77663e-06	6.01421e-05	chrI	14620388	14620632	-	NaN	NaN	FALSE	FALSE	FALSE	-2.02
WBGene00013764	Y113G7B.15	34.1943	3.55908	0.359027	9.91314	3.64975e-23	2.83702e-21	chrV	20228966	20233843	-	WBGene00033772	CBG12906	FALSE	FALSE	FALSE	0.04
WBGene00013771	Y113G7C.1	9.41602	1.72699	0.405227	4.26178	2.02803e-05	0.000141505	chrV	20317742	20324024	+	NaN	NaN	FALSE	TRUE	FALSE	-2.35
WBGene00013800	Y116A8C.23	11.9473	1.9607	0.402615	4.86992	1.11644e-06	1.05341e-05	chrIV	17053594	17055513	+	WBGene00035913	CBG15771	FALSE	FALSE	FALSE	-1.63
WBGene00013801	Y116A8C.24	6.7956	1.57447	0.403104	3.90587	9.38874e-05	0.000549517	chrIV	17068795	17070903	-	WBGene00030853	CBG09226	FALSE	FALSE	TRUE	-1.9
WBGene00013811	Y116A8C.38	9.59778	1.99044	0.405517	4.90839	9.18276e-07	8.84713e-06	chrIV	17131545	17133657	+	WBGene00030853	CBG09226	FALSE	FALSE	FALSE	-1.62
WBGene00013814	Y116A8C.43	20.1519	1.14371	0.367623	3.1111	0.0018639	0.0073064	chrIV	17088851	17090646	+	WBGene00023815	CBG00426	FALSE	TRUE	TRUE	-2
WBGene00044754	Y119C1B.12	9.66571	1.50882	0.401954	3.75372	0.000174228	0.000945241	chrI	4520070	4522768	+	NaN	NaN	FALSE	TRUE	FALSE	-2.02
WBGene00012444	Y15E3A.5	785.889	1.87053	0.298868	6.25872	3.88155e-10	6.98565e-09	chrX	15343154	15344146	+	WBGene00029654	CBG07687	FALSE	TRUE	TRUE	-1.07
WBGene00021194	Y16E11A.2	287.423	2.95762	0.404632	7.3094	2.68343e-13	7.88075e-12	chrII	1979245	1984118	-	NaN	NaN	TRUE	FALSE	FALSE	-1.73
WBGene00012450	Y17D7B.2	24.47	1.46682	0.344537	4.25736	2.06856e-05	0.000143894	chrV	18787806	18789617	+	WBGene00041904	CBG23580	TRUE	TRUE	FALSE	-2.06
WBGene00012456	Y17D7C.2	216.428	2.96024	0.253938	11.6573	2.10545e-31	2.74716e-29	chrV	18716075	18719944	-	WBGene00033654	CBG12753	FALSE	FALSE	TRUE	-2.11
WBGene00012470	Y17G7B.19	13.6588	2.62723	0.401178	6.54878	5.80079e-11	1.19328e-09	chrII	12108273	12112552	-	NaN	NaN	FALSE	FALSE	FALSE	-1.51
WBGene00021207	Y18H1A.1	29.9877	2.2946	0.336994	6.80902	9.82626e-12	2.31907e-10	chrI	688286	691267	+	WBGene00025388	CBG02314	FALSE	TRUE	FALSE	-0.94
WBGene00012379	Y1A5A.1	9.75944	1.49418	0.402272	3.71434	0.000203737	0.00108314	chrIII	3985565	3986809	-	WBGene00026459	CBG03641	FALSE	FALSE	FALSE	-1.97
WBGene00021244	Y22D7AL.4	55.7142	2.38442	0.272185	8.76028	1.94765e-18	1.03124e-16	chrIII	1626632	1637561	+	WBGene00032784	CBG11700	FALSE	FALSE	FALSE	-1.75
WBGene00021256	Y22D7AR.2	74.1578	1.13046	0.22376	5.05212	4.36934e-07	4.56606e-06	chrIII	1705946	1713729	+	WBGene00024128	CBG00796	FALSE	FALSE	FALSE	0.43
WBGene00021287	Y24D9B.1	19.9543	1.14983	0.354721	3.24152	0.00118895	0.00497219	chrIV	4317358	4321912	+	NaN	NaN	FALSE	FALSE	FALSE	-1.57
WBGene00077684	Y26D4A.21	15.1659	1.55387	0.384079	4.04571	5.21643e-05	0.000328808	chrI	13101357	13101901	+	NaN	NaN	FALSE	FALSE	FALSE	-1.98
WBGene00012501	Y26D4A.3	13.0094	1.23363	0.389628	3.16618	0.00154454	0.00622964	chrI	13072229	13072958	-	NaN	NaN	FALSE	FALSE	FALSE	-1.72
WBGene00021302	Y32G9A.3	7.89052	1.28295	0.405557	3.16342	0.00155929	0.00627944	chrV	1911402	1913572	+	NaN	NaN	FALSE	FALSE	FALSE	-1.92
WBGene00012537	Y37A1B.4	8.97199	1.39725	0.4052	3.4483	0.00056413	0.00261084	chrIV	14059551	14060712	-	NaN	NaN	FALSE	FALSE	FALSE	-1.59
WBGene00021373	Y37E11AR.7	3.62576	1.17004	0.375101	3.11926	0.00181304	0.00713396	chrIV	3752612	3755419	-	WBGene00270601	CBG30449	FALSE	FALSE	FALSE	-1.55
WBGene00021381	Y37E11B.10	25.9541	3.0271	0.370496	8.17039	3.07397e-16	1.28789e-14	chrIV	3603550	3606466	-	WBGene00030190	CBG08390	FALSE	FALSE	FALSE	-1.4
WBGene00021382	Y37F4.1	488.415	4.9464	0.213015	23.2209	2.79785e-119	2.43373e-116	chrI	10859534	10860769	+	WBGene00030245	CBG08460	FALSE	FALSE	FALSE	-2.3
WBGene00021385	Y37F4.4	5.18689	1.1846	0.391887	3.02281	0.00250436	0.00938141	chrI	10855509	10855799	-	NaN	NaN	FALSE	FALSE	FALSE	-2.31
WBGene00021386	Y37F4.5	149.225	4.80779	0.321455	14.9563	1.4165e-50	3.6444e-48	chrI	10861215	10863453	-	WBGene00086813	CBG25399	FALSE	FALSE	FALSE	-1.95
WBGene00044289	Y37F4.8	44.1964	1.4519	0.277868	5.22514	1.74028e-07	1.96354e-06	chrI	10867554	10868530	-	WBGene00030239	CBG08451	FALSE	FALSE	FALSE	-1.78
WBGene00044034	Y38E10A.28	71.1143	2.5392	0.301746	8.41501	3.92867e-17	1.79862e-15	chrII	12629687	12631995	+	NaN	NaN	FALSE	FALSE	FALSE	-0.17
WBGene00271657	Y38E10A.33	4.99722	1.39624	0.395657	3.52891	0.000417273	0.00200588	chrII	12679415	12679591	-	NaN	NaN	FALSE	FALSE	FALSE	-1.17
WBGene00012607	Y38F1A.4	53.9979	1.12404	0.279683	4.01896	5.84547e-05	0.00036431	chrII	12966872	12969215	-	WBGene00025757	CBG02767	FALSE	FALSE	FALSE	-1.86
WBGene00012609	Y38F1A.7	4.85257	1.3285	0.392175	3.38752	0.000705266	0.00317161	chrII	12996921	12997804	-	WBGene00025761	CBG02771	FALSE	FALSE	FALSE	-1.61
WBGene00012627	Y38H6C.15	15.9647	1.35741	0.389669	3.4835	0.000494903	0.002327	chrV	20534774	20536308	-	NaN	NaN	FALSE	FALSE	FALSE	-2.15
WBGene00194744	Y38H6C.25	38.7691	3.40734	0.346785	9.82551	8.74315e-23	6.54554e-21	chrV	20519227	20520062	+	NaN	NaN	FALSE	TRUE	FALSE	-2.47
WBGene00012621	Y38H6C.8	735.316	4.81794	0.199159	24.1915	2.73544e-129	2.93931e-126	chrV	20514637	20515706	+	WBGene00032201	Cbr-clec-86	FALSE	TRUE	FALSE	-2.35
WBGene00012622	Y38H6C.9	36.5808	1.34816	0.304301	4.43034	9.40826e-06	7.14004e-05	chrV	20520250	20522270	-	NaN	NaN	FALSE	FALSE	FALSE	-2.47
WBGene00012637	Y38H8A.3	10.2361	1.37005	0.402115	3.40711	0.000656542	0.00297646	chrIV	13472497	13474005	+	NaN	NaN	FALSE	TRUE	FALSE	-1.86
WBGene00012638	Y38H8A.4	6.80629	1.49385	0.404192	3.6959	0.000219111	0.00115379	chrIV	13470566	13472369	-	WBGene00033173	CBG12184	FALSE	FALSE	FALSE	-2.03
WBGene00012654	Y39A1A.16	24.6278	2.66395	0.366044	7.27767	3.39625e-13	9.86317e-12	chrIII	10679474	10682212	+	WBGene00039289	CBG20260	TRUE	FALSE	FALSE	-1.03
WBGene00012655	Y39A1A.17	7.81437	2.00915	0.404449	4.96762	6.7779e-07	6.70704e-06	chrIII	10687127	10691101	-	WBGene00042481	CBG24348	FALSE	TRUE	FALSE	-0.99
WBGene00021436	Y39A3B.1	34.9102	1.50996	0.299435	5.04268	4.59055e-07	4.76994e-06	chrIII	2006029	2009196	+	WBGene00035452	CBG15123	FALSE	FALSE	FALSE	-2.06
WBGene00012689	Y39B6A.30	13.6588	1.62343	0.39372	4.12331	3.73469e-05	0.000243562	chrV	19014573	19020001	+	NaN	NaN	FALSE	FALSE	FALSE	-2.27
WBGene00021458	Y39G10AL.1	12.8794	1.59254	0.393186	4.05036	5.11395e-05	0.00032324	chrI	2279835	2281516	+	WBGene00026645	CBG03875	FALSE	FALSE	FALSE	-1.79
WBGene00012729	Y39G8B.10	203.317	1.19176	0.197288	6.0407	1.53447e-09	2.52751e-08	chrII	13982048	13983115	-	WBGene00270482	CBG30158	FALSE	FALSE	FALSE	-1.58
WBGene00012726	Y39G8B.5	50.471	2.40427	0.291267	8.25452	1.52519e-16	6.63349e-15	chrII	13987616	13991838	-	WBGene00029032	Cbr-ikke-1	FALSE	TRUE	TRUE	-1.25
WBGene00021478	Y39H10A.1	22.087	2.343	0.390407	6.00143	1.95592e-09	3.17307e-08	chrV	3767204	3767734	+	WBGene00087508	CBG26094	FALSE	FALSE	FALSE	-2.26
WBGene00021496	Y40C5A.3	11.8171	2.06263	0.401271	5.14025	2.74376e-07	2.9783e-06	chrIV	7333638	7346851	-	WBGene00028221	CBG05845	FALSE	FALSE	TRUE	-2.29
WBGene00012754	Y41C4A.7	40.1887	3.78401	0.361652	10.4631	1.2759e-25	1.2139e-23	chrIII	11698869	11700087	+	WBGene00034035	CBG13244	FALSE	FALSE	FALSE	-1.47
WBGene00021513	Y41D4B.6	20.076	1.15434	0.36543	3.15885	0.0015839	0.00636453	chrIV	1633772	1637367	+	NaN	NaN	FALSE	FALSE	FALSE	-1.66
WBGene00012771	Y41E3.13	46.7435	3.97981	0.372278	10.6904	1.12844e-26	1.13886e-24	chrIV	15058294	15058694	+	NaN	NaN	FALSE	FALSE	FALSE	-2.05
WBGene00044003	Y41E3.18	6.57208	1.76761	0.40062	4.41219	1.0233e-05	7.69247e-05	chrIV	15061929	15065748	-	WBGene00034500	CBG13798	FALSE	FALSE	FALSE	-1.88
WBGene00044979	Y41E3.19	95.725	4.51169	0.319573	14.1179	2.94784e-45	6.33507e-43	chrIV	15056131	15057889	+	NaN	NaN	FALSE	FALSE	FALSE	-2.08
WBGene00021537	Y42H9AR.2	15.8649	1.57934	0.395539	3.99287	6.52779e-05	0.000400648	chrIV	8099918	8101424	+	WBGene00035792	CBG15624	FALSE	FALSE	TRUE	-1.74
WBGene00012823	Y43F8B.13	24.3319	1.06157	0.33218	3.19576	0.00139464	0.00570312	chrV	19456017	19457300	+	NaN	NaN	FALSE	TRUE	FALSE	-2.43
WBGene00012824	Y43F8B.14	47.0917	1.35147	0.294661	4.58652	4.507e-06	3.6787e-05	chrV	19452183	19455031	-	NaN	NaN	FALSE	FALSE	FALSE	-2.43
WBGene00045415	Y43F8B.15	10.4174	1.26081	0.395951	3.18427	0.00145118	0.00590262	chrV	19460818	19462102	-	NaN	NaN	FALSE	FALSE	FALSE	-2.42
WBGene00077688	Y43F8B.19	21.2149	2.38289	0.371158	6.42016	1.36128e-10	2.63138e-09	chrV	19510780	19512164	-	WBGene00271441	CBG30875	FALSE	FALSE	FALSE	-0.65
WBGene00012813	Y43F8B.2	17285	3.29641	0.107976	30.5291	1.07221e-204	2.79802e-201	chrV	19519925	19533110	-	WBGene00028072	CBG05668	FALSE	FALSE	TRUE	-1.78
WBGene00219302	Y43F8B.28	72.0786	2.41836	0.263972	9.16144	5.12082e-20	3.10771e-18	chrV	19485319	19485873	+	NaN	NaN	FALSE	FALSE	FALSE	-0.55
WBGene00012814	Y43F8B.3	767.233	1.03384	0.320575	3.22494	0.00125998	0.00522975	chrV	19503108	19519950	+	WBGene00028073	CBG05669	FALSE	TRUE	FALSE	-1.47
WBGene00012819	Y43F8B.9	65.6254	2.24063	0.290481	7.71351	1.22404e-14	4.25086e-13	chrV	19479203	19480459	+	NaN	NaN	FALSE	TRUE	FALSE	-0.48
WBGene00012827	Y43F8C.5	5.46525	1.19937	0.398392	3.01054	0.00260786	0.00973791	chrV	19631371	19632662	-	NaN	NaN	FALSE	FALSE	FALSE	-1.89
WBGene00044257	Y45F10D.16	12.4572	1.33938	0.394103	3.39856	0.000677424	0.00305694	chrIV	13776415	13777149	+	NaN	NaN	FALSE	FALSE	FALSE	-2.19
WBGene00012921	Y46G5A.36	63.816	1.53106	0.260565	5.87591	4.20536e-09	6.44458e-08	chrII	12823649	12824177	+	WBGene00037853	CBG18428	FALSE	TRUE	FALSE	0
WBGene00021600	Y46H3A.4	565.805	4.17666	0.176899	23.6105	3.008e-123	2.74736e-120	chrV	1809560	1811135	-	NaN	NaN	FALSE	TRUE	FALSE	-2.18
WBGene00021601	Y46H3A.5	601.365	4.19434	0.174052	24.0982	2.61216e-128	2.65091e-125	chrV	1811423	1814116	-	WBGene00040534	CBG21853	FALSE	FALSE	FALSE	-2.07
WBGene00012942	Y47D3B.6	499.301	4.15283	0.194074	21.3981	1.39025e-101	8.46521e-99	chrIII	11427135	11428414	+	WBGene00034065	CBG13285	TRUE	FALSE	FALSE	-1.6
WBGene00021625	Y47D7A.13	4968.27	1.46811	0.303002	4.84523	1.26465e-06	1.17985e-05	chrV	4434883	4435928	-	WBGene00042656	CBG24580	FALSE	FALSE	FALSE	-2.23
WBGene00021627	Y47D7A.15	21.278	1.33483	0.369515	3.61238	0.000303396	0.00152424	chrV	4431791	4433185	-	WBGene00041914	CBG23596	FALSE	FALSE	FALSE	-1.97
WBGene00021653	Y47G6A.30	15.4518	1.34582	0.393101	3.4236	0.000617975	0.00282709	chrI	3523972	3524590	-	NaN	NaN	FALSE	FALSE	FALSE	-1.67
WBGene00012946	Y47H9B.2	13.994	2.17052	0.402147	5.39732	6.76422e-08	8.25398e-07	chrI	11744172	11747451	+	WBGene00030244	CBG08459	FALSE	FALSE	FALSE	-2.16
WBGene00194684	Y48A6B.14	27.9885	3.15452	0.375686	8.39671	4.59157e-17	2.08642e-15	chrIII	11031609	11032963	+	NaN	NaN	FALSE	FALSE	FALSE	-1.97
WBGene00012969	Y48A6B.8	150.909	1.42404	0.199006	7.15576	8.3209e-13	2.29952e-11	chrIII	11027250	11029437	-	WBGene00037376	CBG17861	FALSE	FALSE	FALSE	-1.97
WBGene00012989	Y48C3A.5	640.339	1.68945	0.169683	9.95649	2.36255e-23	1.88457e-21	chrII	13272634	13304229	+	WBGene00039721	CBG20803	FALSE	FALSE	FALSE	-0.74
WBGene00021678	Y48G1C.5	12.598	1.36727	0.389855	3.50712	0.000452977	0.00215202	chrI	55293	64066	-	WBGene00024411	CBG01136	FALSE	FALSE	FALSE	-1.37
WBGene00013027	Y49A3A.4	47.6538	1.27033	0.300755	4.2238	2.40221e-05	0.000165029	chrV	14356900	14358390	-	WBGene00027266	CBG04629	FALSE	FALSE	FALSE	-2.18
WBGene00013044	Y49E10.25	6.69599	1.28078	0.404953	3.16278	0.0015627	0.00629179	chrIII	12488679	12492084	-	WBGene00087236	CBG25822	FALSE	FALSE	FALSE	-0.96
WBGene00045239	Y49E10.29	5.96703	1.25706	0.403618	3.11448	0.00184271	0.00723112	chrIII	12469169	12472541	+	WBGene00032775	CBG11690	FALSE	TRUE	FALSE	-1.56
WBGene00021728	Y49F6C.6	317.998	1.31825	0.154379	8.53905	1.35331e-17	6.71764e-16	chrII	3361899	3365961	-	NaN	NaN	TRUE	FALSE	FALSE	0.98
WBGene00013053	Y50E8A.10	8.49867	1.7919	0.405262	4.42159	9.79781e-06	7.40797e-05	chrV	14779996	14781078	+	WBGene00087973	CBG26559	FALSE	FALSE	TRUE	-2.3
WBGene00013054	Y50E8A.11	7.2683	1.44979	0.404975	3.57996	0.00034365	0.00169615	chrV	14781493	14782209	+	WBGene00028955	CBG06717	FALSE	FALSE	FALSE	-2.3
WBGene00013055	Y50E8A.12	56.7626	3.64849	0.317675	11.485	1.56967e-30	1.91154e-28	chrV	14782658	14784065	-	WBGene00032714	CBG11617	FALSE	FALSE	FALSE	-2.27
WBGene00013072	Y51A2D.1	17.4447	2.32838	0.402073	5.79094	6.99928e-09	1.0204e-07	chrV	18508873	18512632	+	WBGene00033786	CBG12922	FALSE	FALSE	FALSE	-2.17
WBGene00013107	Y51H4A.13	24.432	1.99522	0.369943	5.39331	6.91706e-08	8.41238e-07	chrIV	16641702	16646373	-	NaN	NaN	FALSE	FALSE	FALSE	-1.79
WBGene00013138	Y53C10A.10	6.34208	1.72796	0.39971	4.32302	1.53908e-05	0.000110993	chrI	12020756	12028313	+	WBGene00034385	CBG13648	FALSE	FALSE	FALSE	-1.96
WBGene00013157	Y53F4B.10	26.3686	1.8985	0.3614	5.25318	1.49494e-07	1.70569e-06	chrII	15001896	15003510	-	NaN	NaN	FALSE	TRUE	FALSE	-1.62
WBGene00013162	Y53F4B.16	6.15171	1.29277	0.400002	3.23191	0.00122966	0.00511435	chrII	15052085	15055718	-	NaN	NaN	FALSE	FALSE	FALSE	-1.49
WBGene00013170	Y53F4B.24	23.4407	3.08269	0.396127	7.78207	7.13466e-15	2.54052e-13	chrII	15131566	15134424	-	WBGene00026069	CBG03147	FALSE	FALSE	FALSE	-1.34
WBGene00013171	Y53F4B.25	48.4685	3.02428	0.33592	9.00298	2.19665e-19	1.26982e-17	chrII	15136186	15145370	+	WBGene00026083	CBG03165	FALSE	FALSE	FALSE	-1.34
WBGene00013172	Y53F4B.26	837.725	4.81703	0.357263	13.4832	1.96533e-41	3.7011e-39	chrII	15140476	15140981	-	NaN	NaN	TRUE	FALSE	FALSE	-1.28
WBGene00044726	Y53F4B.43	128.125	5.15837	0.305402	16.8904	5.29178e-64	1.75754e-61	chrII	14988471	14992667	+	NaN	NaN	FALSE	FALSE	FALSE	-1.57
WBGene00013154	Y53F4B.7	725.385	4.2385	0.37631	11.2633	1.99106e-29	2.25905e-27	chrII	14992898	14993403	+	NaN	NaN	TRUE	FALSE	FALSE	-1.54
WBGene00021799	Y53G8AL.1	148.471	1.6536	0.220022	7.51561	5.66467e-14	1.79335e-12	chrIII	3233102	3241263	+	WBGene00039318	CBG20299	TRUE	FALSE	FALSE	-1.15
WBGene00021805	Y53G8AM.5	12.2802	1.23043	0.399968	3.07632	0.0020957	0.00807982	chrIII	3256730	3258395	-	WBGene00028620	CBG06325	FALSE	FALSE	FALSE	-1.43
WBGene00021821	Y54B9A.1	595.108	1.16364	0.154251	7.5438	4.56469e-14	1.45775e-12	chrV	9439160	9439549	-	NaN	NaN	TRUE	FALSE	FALSE	-2.16
WBGene00013194	Y54E2A.9	9.9277	1.54893	0.404249	3.83163	0.000127298	0.000714746	chrII	14785184	14785995	-	WBGene00034891	CBG14364	FALSE	TRUE	FALSE	-1.31
WBGene00013198	Y54E5A.2	89.804	1.3406	0.239521	5.59702	2.18066e-08	2.91825e-07	chrI	14694154	14700392	+	WBGene00030494	CBG08756	FALSE	FALSE	TRUE	-1.31
WBGene00021853	Y54F10AM.11	24.4467	1.19392	0.353291	3.37943	0.000726365	0.00325928	chrIII	2562982	2563983	-	WBGene00039943	CBG21071	FALSE	TRUE	FALSE	-2.04
WBGene00021858	Y54F10BM.3	47.8386	1.92453	0.280345	6.86488	6.65477e-12	1.60162e-10	chrIII	2277279	2289967	+	NaN	NaN	TRUE	TRUE	FALSE	-1.64
WBGene00021878	Y54G2A.13	68.0657	3.62601	0.308697	11.7462	7.38561e-32	9.7763e-30	chrIV	2814568	2819733	-	WBGene00039988	CBG21131	FALSE	FALSE	FALSE	-2.02
WBGene00021880	Y54G2A.15	43.8674	1.00945	0.298737	3.37906	0.000727346	0.00326288	chrIV	2843224	2844007	-	NaN	NaN	FALSE	FALSE	FALSE	-0.84
WBGene00021892	Y54G2A.28	10.0227	1.83815	0.403463	4.55594	5.21528e-06	4.19866e-05	chrIV	3009639	3012421	-	WBGene00026233	CBG03359	FALSE	FALSE	FALSE	-1.5
WBGene00043061	Y54G2A.38	19.1091	1.71163	0.363518	4.70852	2.4952e-06	2.16634e-05	chrIV	2759463	2762083	+	WBGene00034585	CBG13904	FALSE	FALSE	TRUE	-1
WBGene00235350	Y54G2A.77	9.52551	1.50677	0.404197	3.7278	0.000193155	0.00103229	chrIV	2762680	2765612	+	WBGene00271599	CBG30961	FALSE	FALSE	TRUE	-1.14
WBGene00021907	Y55B1AR.3	54.8878	3.92919	0.329767	11.9151	9.87924e-33	1.38818e-30	chrIII	602708	603822	-	NaN	NaN	FALSE	FALSE	FALSE	-1.2
WBGene00021908	Y55B1AR.4	35.6575	3.66249	0.363078	10.0874	6.28392e-24	5.31427e-22	chrIII	604003	605515	-	NaN	NaN	FALSE	FALSE	FALSE	-1.15
WBGene00021911	Y55B1BR.1	23.1358	2.33002	0.361157	6.45156	1.10708e-10	2.18155e-09	chrIII	440267	443494	+	WBGene00035933	CBG15796	FALSE	FALSE	FALSE	-1.93
WBGene00013244	Y56A3A.33	316.583	3.40346	0.194336	17.5133	1.13416e-68	4.14352e-66	chrIII	11999497	12002950	-	WBGene00034110	CBG13331	FALSE	TRUE	TRUE	-1.73
WBGene00021977	Y58A7A.3	1240.14	1.95532	0.28732	6.80538	1.0078e-11	2.36929e-10	chrV	5077849	5080903	-	WBGene00030420	CBG08668	FALSE	FALSE	FALSE	-2.45
WBGene00021978	Y58A7A.4	135.856	2.027	0.404354	5.01293	5.3607e-07	5.47419e-06	chrV	5082002	5085007	-	WBGene00030420	CBG08668	FALSE	FALSE	FALSE	-2.55
WBGene00021979	Y58A7A.5	190.102	2.82169	0.251973	11.1984	4.15255e-29	4.62528e-27	chrV	5085886	5086969	-	WBGene00030420	CBG08668	FALSE	FALSE	FALSE	-2.52
WBGene00013356	Y59A8B.24	43.0218	3.18343	0.339137	9.38684	6.18296e-21	4.09218e-19	chrV	17951949	17952149	+	NaN	NaN	FALSE	TRUE	FALSE	-2.1
WBGene00044521	Y5H2A.4	7.4433	1.50297	0.405359	3.70777	0.000209096	0.00110742	chrV	2272441	2274353	-	WBGene00031181	CBG09623	FALSE	FALSE	FALSE	-1.9
WBGene00022032	Y65B4A.9	18.1345	1.19196	0.3659	3.25761	0.00112357	0.00473453	chrI	664426	666900	-	WBGene00042177	CBG23947	FALSE	FALSE	TRUE	-1.54
WBGene00022066	Y67D8C.2	24.2092	1.33775	0.363107	3.68418	0.000229442	0.00120195	chrIV	3072297	3073916	+	NaN	NaN	FALSE	FALSE	FALSE	-1.27
WBGene00022090	Y69A2AR.19	813.792	3.55479	0.202881	17.5216	9.80354e-69	3.65472e-66	chrIV	2488820	2494135	+	NaN	NaN	FALSE	FALSE	FALSE	-1.97
WBGene00013474	Y69E1A.2	15.0538	2.36792	0.392972	6.02567	1.68408e-09	2.76149e-08	chrIV	10949767	10951133	+	WBGene00040064	CBG21223	FALSE	FALSE	FALSE	-0.43
WBGene00077455	Y69H2.17	10.571	1.43729	0.401307	3.58152	0.000341596	0.00168829	chrV	18685060	18686349	+	WBGene00039649	CBG20715	FALSE	FALSE	FALSE	-1.7
WBGene00013482	Y69H2.7	1073.07	1.1293	0.0949137	11.8982	1.20965e-32	1.67399e-30	chrV	18689989	18696069	+	WBGene00042517	CBG24393	FALSE	FALSE	FALSE	-1.61
WBGene00044207	Y6G8.5	24.4015	2.226	0.379643	5.8634	4.53473e-09	6.86865e-08	chrV	17614694	17615709	-	NaN	NaN	TRUE	TRUE	FALSE	-1.33
WBGene00045501	Y6G8.8	10.2197	2.27682	0.405604	5.61342	1.98368e-08	2.67226e-07	chrV	17620566	17622750	+	NaN	NaN	TRUE	FALSE	FALSE	-1.22
WBGene00013498	Y70G10A.2	32.303	1.40904	0.329913	4.27093	1.9466e-05	0.000136501	chrIII	10228164	10234079	-	WBGene00031993	CBG10696	FALSE	FALSE	FALSE	-1.74
WBGene00013501	Y71A12B.3	7.02983	1.20663	0.397655	3.03437	0.00241038	0.00908404	chrI	13893133	13894476	+	NaN	NaN	FALSE	FALSE	FALSE	-2.31
WBGene00013505	Y71A12B.8	7.96094	1.59638	0.405584	3.93601	8.28468e-05	0.000492202	chrI	13938185	13942016	+	NaN	NaN	FALSE	TRUE	FALSE	-2.19
WBGene00022140	Y71G12A.4	16.8138	1.88794	0.373566	5.05382	4.33057e-07	4.53073e-06	chrI	1885205	1894905	-	WBGene00040829	CBG22222	FALSE	TRUE	TRUE	-1.95
WBGene00022157	Y71G12B.22	49.1978	3.19631	0.333372	9.58782	8.99687e-22	6.27274e-20	chrI	1663412	1667414	-	WBGene00040767	CBG22144	FALSE	FALSE	FALSE	-1.54
WBGene00044358	Y71G12B.33	42.5414	3.91884	0.359292	10.9071	1.06576e-27	1.11248e-25	chrI	1657513	1663331	-	WBGene00040830	CBG22223	FALSE	TRUE	FALSE	-1.29
WBGene00022213	Y73B3A.11	152.927	2.15235	0.207997	10.348	4.27363e-25	3.82678e-23	chrX	146463	148812	+	NaN	NaN	FALSE	FALSE	FALSE	-1.43
WBGene00022267	Y73C8C.10	30.9433	1.66405	0.345329	4.81873	1.44478e-06	1.32488e-05	chrV	3125566	3127770	-	WBGene00270710	CBG30656	FALSE	FALSE	FALSE	-2.5
WBGene00013567	Y75B12B.1	158.353	1.2993	0.19327	6.7227	1.78382e-11	4.02931e-10	chrV	15184706	15185878	+	WBGene00036023	CBG15918	FALSE	TRUE	FALSE	-2.5
WBGene00013573	Y75B12B.11	18.3359	2.60343	0.3876	6.71678	1.85781e-11	4.16911e-10	chrV	15191296	15191836	+	WBGene00037968	CBG18576	FALSE	FALSE	FALSE	-2.52
WBGene00022288	Y75B7B.1	27.8728	1.28437	0.325852	3.94157	8.09483e-05	0.000482599	chrV	1270911	1273043	+	WBGene00039745	CBG20831	FALSE	FALSE	FALSE	-2.12
WBGene00022289	Y75B7B.2	20.4456	2.0832	0.404442	5.15081	2.59362e-07	2.82515e-06	chrV	1274210	1276006	-	WBGene00028877	Cbr-tank-1	FALSE	TRUE	FALSE	-1.73
WBGene00013556	Y75B8A.23	50.5015	2.70166	0.313722	8.61163	7.20271e-18	3.65478e-16	chrIII	12250602	12251009	+	WBGene00026448	CBG03618	FALSE	FALSE	FALSE	-1.84
WBGene00013559	Y75B8A.28	159.236	3.17224	0.217382	14.5929	3.11467e-48	7.29432e-46	chrIII	12319108	12323771	+	WBGene00032856	Cbr-pqn-92	FALSE	FALSE	FALSE	-1.17
WBGene00013563	Y75B8A.33	20.4398	1.88097	0.361685	5.20056	1.98685e-07	2.21169e-06	chrIII	12361859	12367373	-	WBGene00032843	CBG11769	FALSE	FALSE	FALSE	1.19
WBGene00235267	Y77E11A.23	7.30449	1.54214	0.404635	3.81118	0.000138305	0.000768609	chrIV	1429041	1430367	-	WBGene00031687	CBG10269	FALSE	TRUE	FALSE	-0.75
WBGene00022311	Y77E11A.8	55.7242	3.55608	0.336617	10.5642	4.3683e-26	4.26715e-24	chrIV	1423095	1425062	-	NaN	NaN	FALSE	FALSE	FALSE	-1.54
WBGene00022315	Y81B9A.1	93.6293	3.90232	0.284984	13.6931	1.11654e-42	2.26621e-40	chrX	9192444	9194382	+	NaN	NaN	FALSE	FALSE	FALSE	-1.44
WBGene00194735	Y82E9BL.19	8.05839	1.52095	0.405485	3.75095	0.000176168	0.000953499	chrIII	1332016	1333708	+	NaN	NaN	FALSE	FALSE	FALSE	-1.62
WBGene00022343	Y82E9BR.10	225.548	3.96526	0.226634	17.4963	1.52859e-68	5.47505e-66	chrIII	1375245	1375591	-	NaN	NaN	FALSE	FALSE	FALSE	-0.73
WBGene00022338	Y82E9BR.5	198.742	1.24636	0.153705	8.1088	5.11237e-16	2.06154e-14	chrIII	1384820	1388350	+	NaN	NaN	FALSE	FALSE	FALSE	-1.14
WBGene00022383	Y95B8A.2	371.688	1.72651	0.223687	7.71842	1.17782e-14	4.11381e-13	chrI	938464	941773	+	NaN	NaN	FALSE	FALSE	FALSE	-1.7
WBGene00044552	Y97E10AR.8	6.9978	1.22725	0.402821	3.04665	0.00231407	0.00878269	chrV	8005326	8005692	+	NaN	NaN	FALSE	FALSE	FALSE	-2.12
WBGene00119204	ZC116.5	66.4344	1.06661	0.265937	4.01075	6.05255e-05	0.000375168	chrV	12608093	12608974	-	NaN	NaN	FALSE	FALSE	FALSE	-1.84
WBGene00022536	ZC178.2	25.7534	2.01	0.365868	5.49377	3.93435e-08	5.02228e-07	chrV	8699736	8712010	-	NaN	NaN	FALSE	FALSE	FALSE	-2.07
WBGene00022537	ZC190.2	24.3667	1.4472	0.34739	4.16592	3.10097e-05	0.000207189	chrV	8681350	8682939	+	WBGene00271217	CBG30487	FALSE	FALSE	FALSE	-2.29
WBGene00022539	ZC190.5	22.4769	1.92746	0.374977	5.14021	2.74426e-07	2.9783e-06	chrV	8672017	8673506	-	WBGene00024692	CBG01452	FALSE	FALSE	FALSE	-2.37
WBGene00022541	ZC190.7	12.3451	1.55001	0.392501	3.94905	7.84611e-05	0.000470844	chrV	8686071	8686864	-	NaN	NaN	FALSE	FALSE	FALSE	-2.19
WBGene00022542	ZC190.8	10.4862	1.46274	0.404725	3.61416	0.000301325	0.00151592	chrV	8686958	8687807	-	WBGene00303287	CBG31346	FALSE	FALSE	FALSE	-2.19
WBGene00044443	ZC21.10	909.343	5.38933	0.156903	34.3482	1.4995e-258	5.47827e-255	chrIII	8530077	8531123	+	NaN	NaN	FALSE	FALSE	FALSE	-1.01
WBGene00022507	ZC21.8	24.4769	2.41396	0.367936	6.5608	5.35182e-11	1.10967e-09	chrIII	8518904	8519945	-	WBGene00037597	CBG18117	FALSE	FALSE	FALSE	-1.18
WBGene00022578	ZC262.1	12.1306	2.0646	0.404658	5.10209	3.35914e-07	3.58001e-06	chrIII	8340797	8341743	+	WBGene00037635	CBG18166	FALSE	FALSE	FALSE	-1.66
WBGene00206468	ZC262.11	6.72646	1.51051	0.402166	3.75593	0.000172696	0.000938602	chrIII	8338993	8339727	-	WBGene00270521	CBG30283	FALSE	FALSE	FALSE	-1.66
WBGene00206477	ZC262.12	6.72646	1.51051	0.402166	3.75593	0.000172696	0.000938602	chrIII	8347188	8347922	-	WBGene00270521	CBG30283	FALSE	FALSE	FALSE	-0.82
WBGene00022581	ZC262.4	8.04831	1.64515	0.405382	4.05826	4.94388e-05	0.000313576	chrIII	8333663	8334233	-	NaN	NaN	TRUE	FALSE	FALSE	-1.8
WBGene00043948	ZC262.7	191.12	1.92675	0.228926	8.41648	3.87968e-17	1.78066e-15	chrIII	8343771	8344336	-	NaN	NaN	TRUE	FALSE	FALSE	-0.82
WBGene00045396	ZC334.12	8.72281	1.54501	0.4056	3.8092	0.000139418	0.000774088	chrI	14028997	14029212	-	NaN	NaN	FALSE	TRUE	FALSE	-1.88
WBGene00013886	ZC412.5	6.99622	1.78992	0.404193	4.42838	9.49454e-06	7.19953e-05	chrV	14874198	14875470	-	WBGene00029017	CBG06801	FALSE	FALSE	TRUE	-1.88
WBGene00022628	ZC513.3	66.8694	1.84909	0.268054	6.89819	5.26685e-12	1.2914e-10	chrV	8047044	8049528	+	WBGene00032624	CBG11514	FALSE	FALSE	TRUE	-2.03
WBGene00022632	ZC581.2	22.7378	1.90469	0.359598	5.2967	1.17912e-07	1.37191e-06	chrI	6655608	6658371	+	WBGene00030661	CBG08984	FALSE	FALSE	FALSE	-2.15
WBGene00022634	ZC581.7	16.2913	1.91324	0.385091	4.96829	6.75474e-07	6.69137e-06	chrI	6660436	6662315	-	WBGene00032090	CBG10819	FALSE	FALSE	TRUE	-2.12
WBGene00013846	ZC84.1	64.3739	1.62014	0.340804	4.75389	1.99541e-06	1.76514e-05	chrIII	9199450	9206285	-	WBGene00029129	CBG06944	FALSE	TRUE	FALSE	-1.76
WBGene00018867	zhp-1	124.743	2.19856	0.214069	10.2703	9.58637e-25	8.41896e-23	chrI	5366944	5367829	-	NaN	NaN	FALSE	FALSE	FALSE	-2.21
WBGene00012101	zip-10	432.055	3.32628	0.23421	14.2021	8.88445e-46	1.95533e-43	chrV	11650079	11650774	-	WBGene00041674	Cbr-zip-10	FALSE	TRUE	FALSE	-1.98
WBGene00007932	zip-5	269.215	1.19726	0.140807	8.50283	1.85019e-17	8.81091e-16	chrV	13264546	13269820	+	WBGene00030996	Cbr-zip-5	FALSE	FALSE	TRUE	-2.29
WBGene00164985	ZK1010.10	64.0143	1.61753	0.270634	5.97681	2.2755e-09	3.6526e-08	chrIII	13002383	13005311	+	WBGene00035927	CBG15785	FALSE	TRUE	FALSE	-2.26
WBGene00271703	ZK1010.12	5.72252	1.61244	0.396515	4.06654	4.7717e-05	0.000304452	chrIII	12991297	12992492	+	NaN	NaN	FALSE	TRUE	FALSE	-2.13
WBGene00014179	ZK1010.5	46.2997	3.59009	0.345412	10.3936	2.65022e-25	2.42058e-23	chrIII	12984493	12987542	-	WBGene00032826	CBG11751	FALSE	TRUE	TRUE	-2.13
WBGene00014181	ZK1010.8	434.255	2.51163	0.15774	15.9225	4.42009e-57	1.24218e-54	chrIII	12995738	13000670	-	WBGene00035926	CBG15784	FALSE	TRUE	FALSE	-2.28
WBGene00045515	ZK1037.13	382.063	5.69626	0.266746	21.3546	3.53204e-101	2.08128e-98	chrV	15318961	15320553	+	NaN	NaN	FALSE	FALSE	FALSE	0.19
WBGene00014196	ZK1053.1	88.7384	3.64659	0.320338	11.3836	5.04819e-30	5.91123e-28	chrI	13227995	13229751	-	NaN	NaN	TRUE	FALSE	FALSE	-2.42
WBGene00014197	ZK1053.2	462.232	4.9869	0.251923	19.7954	3.26258e-87	1.56836e-84	chrI	13232121	13234686	+	WBGene00039359	CBG20354	TRUE	FALSE	FALSE	-2.42
WBGene00014199	ZK1053.4	9.57373	2.06555	0.405592	5.09268	3.53046e-07	3.75165e-06	chrI	13241645	13244797	+	NaN	NaN	FALSE	FALSE	FALSE	-2.36
WBGene00014201	ZK1053.6	7.4374	1.8346	0.404611	4.53422	5.78169e-06	4.58906e-05	chrI	13238540	13240726	+	WBGene00039351	CBG20346	FALSE	FALSE	FALSE	-2.43
WBGene00014223	ZK1098.6	31.5937	1.36005	0.307926	4.41681	1.0017e-05	7.56116e-05	chrIII	9527151	9528689	+	WBGene00034160	CBG13384	FALSE	FALSE	FALSE	-2.13
WBGene00044588	ZK1236.9	179.073	3.00046	0.273738	10.961	5.88184e-28	6.17492e-26	chrIII	8432469	8435174	-	WBGene00037610	CBG18136	FALSE	FALSE	TRUE	-1.09
WBGene00022866	ZK1240.1	736.899	4.52155	0.202904	22.2842	5.26209e-110	3.56009e-107	chrII	2329355	2331792	+	NaN	NaN	TRUE	FALSE	FALSE	0.04
WBGene00206413	ZK1240.11	146.281	2.76588	0.224662	12.3113	7.87725e-35	1.21944e-32	chrII	2325256	2326245	+	NaN	NaN	FALSE	FALSE	FALSE	-0.42
WBGene00022870	ZK1240.5	27.1163	1.72417	0.341507	5.0487	4.44821e-07	4.62994e-06	chrII	2316163	2317877	-	NaN	NaN	FALSE	FALSE	FALSE	-0.3
WBGene00022871	ZK1240.6	46.9351	1.91113	0.286245	6.67656	2.44615e-11	5.39659e-10	chrII	2322367	2322907	-	NaN	NaN	FALSE	FALSE	FALSE	-0.41
WBGene00022872	ZK1240.8	729.014	5.74981	0.207626	27.6931	8.46238e-169	1.1891e-165	chrII	2326995	2329053	-	NaN	NaN	TRUE	TRUE	FALSE	0.48
WBGene00022884	ZK1248.17	529.912	5.81754	0.252447	23.0446	1.66435e-117	1.32308e-114	chrII	5845254	5845541	-	NaN	NaN	FALSE	FALSE	FALSE	-2.44
WBGene00022692	ZK250.9	287.423	2.95762	0.404632	7.3094	2.68343e-13	7.88075e-12	chrII	1963063	1967936	-	NaN	NaN	TRUE	FALSE	FALSE	NA
WBGene00013956	ZK265.3	14.1375	2.49975	0.396172	6.30975	2.79487e-10	5.17263e-09	chrI	8242104	8243572	+	NaN	NaN	FALSE	FALSE	FALSE	-2.22
WBGene00013961	ZK285.2	5.61157	1.26949	0.399868	3.17478	0.00149949	0.00607344	chrV	16046873	16047446	+	NaN	NaN	FALSE	FALSE	FALSE	-1.77
WBGene00022699	ZK353.3	4.3338	1.23081	0.389261	3.16192	0.00156731	0.00630616	chrIII	8395985	8396727	+	WBGene00087395	CBG25981	FALSE	TRUE	FALSE	-1.72
WBGene00022700	ZK353.4	26.9353	1.96178	0.345224	5.68265	1.32622e-08	1.84651e-07	chrIII	8388466	8389639	-	WBGene00037624	CBG18153	FALSE	FALSE	FALSE	-1.69
WBGene00022705	ZK354.2	5.45826	1.34856	0.39976	3.37342	0.000742411	0.00331823	chrIV	5313405	5315525	+	WBGene00042177	CBG23947	FALSE	FALSE	FALSE	-1.95
WBGene00086560	ZK355.8	13.1888	2.31162	0.401308	5.76021	8.4008e-09	1.21185e-07	chrII	2927813	2928149	+	NaN	NaN	FALSE	FALSE	FALSE	-0.43
WBGene00044352	ZK381.8	7.3818	1.64685	0.40425	4.07384	4.62445e-05	0.000295987	chrIV	6968209	6970280	-	WBGene00028126	CBG05732	FALSE	FALSE	FALSE	-2.09
WBGene00050881	ZK39.10	7.7677	1.66102	0.405521	4.09601	4.2033e-05	0.000270835	chrI	11160034	11162602	+	WBGene00270886	CBG29859	FALSE	FALSE	FALSE	-1.76
WBGene00022746	ZK470.4	79.6258	2.21942	0.252871	8.77688	1.68071e-18	8.95088e-17	chrX	4139516	4139767	-	NaN	NaN	FALSE	FALSE	FALSE	-1.84
WBGene00022752	ZK484.6	39.1602	1.63329	0.309839	5.27142	1.35372e-07	1.56015e-06	chrI	6090015	6090919	-	NaN	NaN	FALSE	FALSE	FALSE	-2.21
WBGene00022753	ZK484.7	20.5012	2.62	0.379432	6.90505	5.01846e-12	1.23547e-10	chrI	6095060	6096589	-	WBGene00026958	CBG04241	FALSE	FALSE	FALSE	-2.29
WBGene00013996	ZK550.2	204.883	1.35508	0.24712	5.48349	4.17005e-08	5.29754e-07	chrIV	17245584	17249750	+	WBGene00023763	CBG00364	FALSE	FALSE	FALSE	-2.05
WBGene00022643	ZK6.8	92.9485	1.52001	0.237503	6.39993	1.55445e-10	2.96711e-09	chrV	381901	384688	+	WBGene00024623	CBG01375	FALSE	FALSE	FALSE	-2.53
WBGene00194816	ZK616.61	4.73973	1.35427	0.39426	3.43496	0.000592634	0.00272454	chrIV	5405645	5407375	+	WBGene00303198	CBG31262	FALSE	FALSE	TRUE	-2.1
WBGene00022780	ZK622.1	21.3052	1.3007	0.356928	3.64415	0.000268281	0.00137198	chrII	5293800	5295612	+	NaN	NaN	FALSE	FALSE	FALSE	-1.49
WBGene00014029	ZK637.12	18.2986	2.46517	0.380095	6.48566	8.83429e-11	1.75769e-09	chrIII	8922292	8925302	+	WBGene00040258	CBG21510	FALSE	TRUE	FALSE	-1.41
WBGene00014032	ZK637.15	6.47287	1.53857	0.402591	3.82168	0.000132544	0.000740196	chrIII	8920110	8921159	+	WBGene00040258	CBG21510	FALSE	TRUE	FALSE	-1.41
WBGene00044763	ZK688.12	8.85352	1.97601	0.405395	4.87428	1.09209e-06	1.03256e-05	chrIII	7912698	7913600	-	WBGene00033252	CBG12280	FALSE	FALSE	FALSE	-0.98
WBGene00044448	ZK783.6	21.2199	2.3204	0.399632	5.80634	6.38515e-09	9.38355e-08	chrIII	7648788	7650005	+	WBGene00024080	CBG00737	FALSE	FALSE	FALSE	-0.92
WBGene00014082	ZK795.2	11.1035	1.31115	0.397192	3.30104	0.000963277	0.00415789	chrIV	12557072	12558975	-	WBGene00034304	CBG13553	FALSE	FALSE	FALSE	-2.1
WBGene00014085	ZK809.1	35.7177	3.2423	0.354249	9.15261	5.55752e-20	3.35047e-18	chrIV	11642102	11643722	+	WBGene00026644	CBG03874	FALSE	FALSE	FALSE	-2.23
WBGene00022820	ZK813.1	7.21371	1.53455	0.398246	3.85328	0.000116545	0.000661566	chrX	3446311	3448253	+	WBGene00034785	CBG14212	FALSE	FALSE	FALSE	-2.2
WBGene00022822	ZK813.3	5.84477	1.63909	0.397429	4.12422	3.71988e-05	0.000242856	chrX	3441839	3442458	+	WBGene00034782	CBG14208	FALSE	FALSE	FALSE	-2.18
WBGene00045394	ZK813.7	4.347	1.18344	0.385552	3.06947	0.0021444	0.00823976	chrX	3444802	3445283	+	NaN	NaN	FALSE	FALSE	FALSE	-2.25
WBGene00022826	ZK816.3	7.26941	1.30766	0.4021	3.25209	0.00114562	0.00481745	chrX	3348121	3348642	+	NaN	NaN	FALSE	FALSE	FALSE	-1.87
WBGene00014089	ZK822.1	237.517	1.27981	0.172192	7.43247	1.06585e-13	3.28328e-12	chrIV	11918110	11922128	-	WBGene00028499	CBG06191	FALSE	FALSE	TRUE	-1.8
WBGene00219456	ZK822.10	41.8312	1.38529	0.284189	4.87453	1.09068e-06	1.03177e-05	chrIV	11916879	11917365	+	NaN	NaN	FALSE	TRUE	FALSE	-1.76
WBGene00219327	ZK822.9	69.3246	3.71712	0.296925	12.5187	5.89705e-36	9.44925e-34	chrIV	11915767	11916126	+	NaN	NaN	FALSE	FALSE	FALSE	-1.76
WBGene00014094	ZK829.3	25.113	1.47507	0.369996	3.98673	6.69907e-05	0.000409407	chrIV	11943314	11945721	-	WBGene00028505	CBG06197	FALSE	FALSE	TRUE	-1.63
WBGene00014097	ZK829.9	295.635	4.12282	0.255113	16.1608	9.53383e-59	2.72116e-56	chrIV	11970534	11972789	+	WBGene00028511	CBG06204	FALSE	FALSE	FALSE	-2.23
WBGene00014116	ZK858.2	9.50226	1.29135	0.402487	3.20842	0.00133466	0.00550343	chrI	9123182	9124509	-	WBGene00033395	CBG12448	FALSE	FALSE	FALSE	-2.08
WBGene00014121	ZK858.8	16.7716	2.12371	0.388987	5.45959	4.77245e-08	5.99163e-07	chrI	9124664	9126155	+	WBGene00033396	CBG12449	FALSE	FALSE	FALSE	-1.96
WBGene00014127	ZK892.3	24.9873	3.19918	0.39349	8.13027	4.28318e-16	1.75822e-14	chrII	10001846	10003987	+	WBGene00034147	CBG13370	FALSE	FALSE	TRUE	-1.35
WBGene00014128	ZK892.4	18.2057	2.65031	0.400425	6.61873	3.62287e-11	7.73119e-10	chrII	10006642	10008089	+	NaN	NaN	FALSE	FALSE	FALSE	-1.33
WBGene00014129	ZK892.5	18.3586	1.93382	0.384308	5.03196	4.85493e-07	5.01896e-06	chrII	10008217	10009401	+	WBGene00270441	CBG30117	FALSE	FALSE	TRUE	-1.37
WBGene00014154	ZK930.4	11.0684	1.40224	0.400535	3.50091	0.000463673	0.00219712	chrII	11906517	11908601	+	WBGene00025747	CBG02751	FALSE	FALSE	FALSE	-0.8
WBGene00014155	ZK930.5	15.4192	1.62105	0.38706	4.18812	2.81277e-05	0.000190018	chrII	11882614	11883685	+	NaN	NaN	FALSE	TRUE	FALSE	-0.93
WBGene00022833	ZK973.4	6.49356	1.63986	0.396867	4.132	3.59615e-05	0.000235874	chrI	4363415	4364048	+	WBGene00270622	CBG30470	FALSE	FALSE	FALSE	-2.13
WBGene00011066	ztf-15	233.545	1.24704	0.189577	6.57803	4.76724e-11	1.00096e-09	chrI	7255380	7258700	+	WBGene00040582	Cbr-ztf-15	FALSE	FALSE	FALSE	-2.18

## Sheet: Supplemental.Table.8_Cbr.HS.UP
WB.ID	gene.name	BaseMean	log2.FC	StdErr	Wald.Stats	P.value	P.adj	chrom	start	end	strand	Cel.ortholog.WB.ID	Cel.ortholog.gene.name	upstream.Hac.HSEs	upstream.Hin.HSEs	Cel.HS.UP	upstream.min.Tajimas.D
WBGene00023602	CBG00126	505.607	1.72222	0.209577	8.2176	2.07613e-16	1.263e-14	chrX	14506618	14507594	-	WBGene00011823	T18D3.6	FALSE	TRUE	FALSE	-2.45
WBGene00023624	CBG00170	140.193	4.81751	0.307547	15.6643	2.65417e-55	7.53503e-53	chrX	14676239	14677147	-	WBGene00044687	B0563.9	FALSE	TRUE	FALSE	-2.37
WBGene00023625	CBG00171	25.0209	2.18796	0.422444	5.17929	2.22727e-07	3.07307e-06	chrX	14677881	14678402	+	WBGene00077673	B0563.10	FALSE	TRUE	FALSE	-2.39
WBGene00023628	CBG00175	281.649	1.09784	0.256071	4.28722	1.8092e-05	0.000152698	chrX	14691545	14693884	+	WBGene00015264	B0563.7	FALSE	TRUE	FALSE	-2.14
WBGene00023630	CBG00178	137.069	1.62796	0.250812	6.49078	8.53957e-11	2.37397e-09	chrX	14708032	14710559	+	WBGene00016182	C28C12.12	FALSE	FALSE	FALSE	-1.97
WBGene00023632	CBG00181	66.4533	2.07112	0.345318	5.99772	2.00104e-09	4.20331e-08	chrX	14717400	14718294	-	WBGene00015262	B0563.5	FALSE	FALSE	FALSE	-2.36
WBGene00023683	CBG00256	387.667	1.40313	0.154068	9.10724	8.45022e-20	6.97497e-18	chrX	15102344	15103557	-	WBGene00008369	D1053.4	FALSE	TRUE	FALSE	-1.83
WBGene00023686	CBG00261	612.517	1.3068	0.268693	4.86354	1.15303e-06	1.3336e-05	chrX	15130426	15135876	-	WBGene00008368	D1053.3	FALSE	FALSE	FALSE	-2.07
WBGene00023691	CBG00271	37.1076	2.79391	0.425959	6.55912	5.41276e-11	1.57728e-09	chrX	15206038	15208922	-	WBGene00013631	Y102F5A.1	FALSE	TRUE	FALSE	-1.87
WBGene00023701	CBG00288	627.565	1.09133	0.185328	5.88868	3.89295e-09	7.77636e-08	chrI	570060	583874	+	NaN	NaN	FALSE	TRUE	FALSE	-2.05
WBGene00023770	CBG00373	20.8395	2.41732	0.373949	6.46431	1.01763e-10	2.77212e-09	chrIV	233820	236245	-	WBGene00011918	T22C1.8	FALSE	FALSE	TRUE	-2.13
WBGene00023815	CBG00426	32.2556	1.72934	0.346054	4.99732	5.81333e-07	7.22828e-06	chrIV	410603	411580	-	WBGene00013814	Y116A8C.43	FALSE	TRUE	TRUE	-1.08
WBGene00023838	CBG00453	10.8601	2.21312	0.426533	5.18862	2.11863e-07	2.94487e-06	chrIV	492024	492757	-	WBGene00007597	C15A11.2	FALSE	TRUE	TRUE	-0.49
WBGene00023884	CBG00506	16.7158	1.41229	0.369935	3.81767	0.000134718	0.000874338	chrII	3991958	3994878	+	NaN	NaN	FALSE	FALSE	FALSE	-1.9
WBGene00023946	CBG00573	4.97254	1.54795	0.415398	3.72642	0.000194222	0.00120183	chrII	4273069	4274973	+	WBGene00011466	T05C12.1	FALSE	TRUE	FALSE	-2.09
WBGene00023972	CBG00600	3359.23	1.02242	0.186155	5.4923	3.96737e-08	6.51504e-07	chrIII	14226071	14231347	+	WBGene00018953	F56C9.10	FALSE	TRUE	FALSE	-2.28
WBGene00023988	CBG00619	202.007	3.67187	0.378856	9.69198	3.26151e-22	3.19953e-20	chrII	3922741	3925125	+	WBGene00009043	F22B5.5	FALSE	FALSE	TRUE	-1.65
WBGene00024066	CBG00720	261.53	1.29532	0.183703	7.05117	1.77423e-12	6.4177e-11	chrII	3481095	3484567	-	WBGene00011471	T05C12.8	FALSE	TRUE	FALSE	-2.25
WBGene00024104	CBG00767	52.4514	1.39432	0.274781	5.07428	3.88957e-07	5.07161e-06	chrV	1421170	1423890	-	WBGene00015218	B0507.1	FALSE	FALSE	FALSE	-1.51
WBGene00024113	CBG00777	5.5751	1.58293	0.41624	3.80293	0.000142995	0.000921039	chrV	1439426	1440018	+	NaN	NaN	FALSE	FALSE	FALSE	-1.44
WBGene00024217	CBG00901	31.6094	1.14154	0.309412	3.68939	0.000224797	0.00136047	chrII	824993	831050	+	WBGene00009690	F44E5.3	FALSE	TRUE	TRUE	-1.7
WBGene00024231	CBG00919	203.946	3.39729	0.201769	16.8375	1.29521e-63	4.25762e-61	chrII	683473	685896	+	WBGene00007225	C01G6.3	TRUE	TRUE	FALSE	-2.25
WBGene00024251	CBG00946	91.249	1.70105	0.289511	5.87559	4.21335e-09	8.32759e-08	chrII	526353	532663	+	WBGene00012138	T28F4.3	FALSE	FALSE	TRUE	-1.41
WBGene00024259	CBG00955	76.2142	2.04467	0.261036	7.83289	4.76772e-15	2.46096e-13	chrII	453541	456924	+	WBGene00018390	F43E2.1	FALSE	TRUE	FALSE	-1.9
WBGene00024279	CBG00978	21.6683	1.79908	0.399761	4.50039	6.78296e-06	6.43831e-05	chrII	374785	379002	+	WBGene00009182	F26H11.4	FALSE	TRUE	TRUE	-1.82
WBGene00024337	CBG01046	15.0604	1.58872	0.427299	3.71806	0.000200761	0.0012378	chrII	55554	56065	+	WBGene00013142	Y53C12A.7	FALSE	TRUE	FALSE	-1.69
WBGene00024339	CBG01048	1209.63	1.65998	0.280223	5.9238	3.14587e-09	6.38614e-08	chrII	53679	54468	+	WBGene00013146	Y53C12B.7	FALSE	FALSE	FALSE	-1.71
WBGene00024384	CBG01104	47.5319	1.54267	0.349452	4.41454	1.01225e-05	9.15818e-05	chrV	5039698	5041817	-	WBGene00021072	W07B8.4	FALSE	TRUE	TRUE	-1.44
WBGene00024434	CBG01161	138.518	2.02457	0.236588	8.55739	1.15451e-17	7.95295e-16	chrV	4821599	4823647	+	NaN	NaN	FALSE	FALSE	FALSE	-1.48
WBGene00024455	CBG01185	5.60887	1.4393	0.409492	3.51486	0.000439992	0.00241976	chrV	4739323	4739922	+	WBGene00021780	scl-17	TRUE	TRUE	FALSE	-1.47
WBGene00024456	CBG01188	25.3231	2.18601	0.380414	5.74641	9.11591e-09	1.67128e-07	chrV	4732555	4733420	-	WBGene00021780	scl-17	TRUE	FALSE	FALSE	-1.48
WBGene00024475	CBG01208	6.88845	1.82944	0.428059	4.27381	1.92162e-05	0.000161312	chrV	4665826	4666600	+	WBGene00019178	scl-12	FALSE	FALSE	TRUE	-1.16
WBGene00024538	CBG01276	48.9825	1.36007	0.320069	4.24929	2.14452e-05	0.00017756	chrV	4449253	4452242	+	WBGene00019567	K09D9.9	FALSE	TRUE	FALSE	-1.58
WBGene00024580	CBG01323	85.9236	1.41912	0.354825	3.99948	6.34806e-05	0.000455199	chrV	4309497	4311252	-	NaN	NaN	FALSE	FALSE	FALSE	-1.71
WBGene00024582	CBG01325	98.842	1.35725	0.364651	3.72205	0.000197609	0.00122098	chrV	4304447	4306140	-	NaN	NaN	FALSE	FALSE	FALSE	-1.66
WBGene00024609	CBG01356	21.7075	1.64821	0.361993	4.55317	5.28442e-06	5.1722e-05	chrV	4201563	4203537	-	WBGene00019104	asp-7	FALSE	FALSE	FALSE	-1.41
WBGene00024643	CBG01396	29.8895	2.13431	0.346737	6.15541	7.48827e-10	1.70276e-08	chrV	4051749	4053600	-	WBGene00015399	cyp-35A1	FALSE	TRUE	FALSE	-1.89
WBGene00024644	CBG01397	1049.63	2.32903	0.251943	9.24426	2.36876e-20	2.05479e-18	chrV	4044578	4045702	-	WBGene00019564	K09D9.1	FALSE	FALSE	TRUE	-1.73
WBGene00024645	CBG01398	139.969	1.4145	0.363537	3.89093	9.98599e-05	0.000674991	chrV	4037705	4039633	-	WBGene00016788	C49G7.10	FALSE	TRUE	TRUE	-1.75
WBGene00024646	CBG01400	61.9105	1.10899	0.341486	3.24756	0.00116399	0.00557284	chrV	4040056	4041724	-	WBGene00019101	F59B1.10	FALSE	TRUE	FALSE	-1.72
WBGene00024679	CBG01438	1034.89	1.51148	0.0850855	17.7643	1.33617e-70	5.00718e-68	chrV	3877848	3886988	-	WBGene00021561	Y45G5AM.9	FALSE	TRUE	FALSE	-1.6
WBGene00024693	CBG01453	21.2105	2.37207	0.38761	6.11974	9.37259e-10	2.09814e-08	chrV	1073820	1074756	-	NaN	NaN	FALSE	TRUE	FALSE	-1.76
WBGene00024700	CBG01467	19.0286	1.59935	0.428	3.7368	0.000186378	0.00115903	chrV	1121724	1123583	-	NaN	NaN	FALSE	FALSE	FALSE	-2.15
WBGene00024955	CBG01768	27.5509	1.13949	0.336327	3.38804	0.000703932	0.00363449	chrIV	10520052	10520619	+	NaN	NaN	FALSE	FALSE	FALSE	-2.13
WBGene00025034	CBG01854	5.87198	1.37156	0.411916	3.32972	0.000869344	0.00434602	chrX	3047883	3051759	+	NaN	NaN	FALSE	FALSE	FALSE	-1.9
WBGene00025100	CBG01935	6.12019	1.30226	0.419933	3.10112	0.00192792	0.00856818	chrX	3451028	3452433	+	WBGene00007649	C17G1.2	FALSE	FALSE	FALSE	-2.27
WBGene00025240	CBG02124	6.34703	1.54586	0.424402	3.64243	0.000270073	0.00158533	chrX	4421552	4425899	-	NaN	NaN	FALSE	FALSE	FALSE	-1.94
WBGene00025265	CBG02167	16.9012	1.33788	0.371629	3.60005	0.000318155	0.00182973	chrX	4611213	4613084	-	NaN	NaN	FALSE	FALSE	FALSE	-1.5
WBGene00025331	CBG02250	64.3989	1.01223	0.24856	4.07239	4.65337e-05	0.000347643	chrI	8064941	8067777	+	WBGene00022709	ZK354.8	FALSE	FALSE	FALSE	-2.35
WBGene00025395	CBG02322	19.0727	1.94704	0.386997	5.03114	4.87564e-07	6.19355e-06	chrII	10593548	10594379	-	WBGene00010016	F54B8.1	FALSE	FALSE	FALSE	-1.98
WBGene00025400	CBG02328	51.2762	2.11213	0.422383	5.00051	5.7178e-07	7.12804e-06	chrII	10576727	10578417	-	WBGene00017277	F09C12.2	FALSE	TRUE	FALSE	-2.03
WBGene00025401	CBG02329	13.057	1.29833	0.410527	3.1626	0.00156369	0.00717935	chrII	10573947	10576177	-	WBGene00017278	F09C12.6	FALSE	FALSE	FALSE	-2.16
WBGene00025459	CBG02400	24.205	1.00837	0.328019	3.07412	0.00211122	0.00925982	chrII	10281452	10283191	-	WBGene00017215	F07F6.1	FALSE	TRUE	FALSE	-2.36
WBGene00025473	CBG02414	19.0221	2.11116	0.375097	5.62829	1.82006e-08	3.16938e-07	chrII	10223924	10224418	+	WBGene00017396	F12A10.7	FALSE	FALSE	TRUE	-2.14
WBGene00025474	CBG02415	16.7917	1.35929	0.413671	3.28592	0.00101649	0.00497022	chrII	10222951	10223458	-	WBGene00077704	F12A10.9	FALSE	TRUE	TRUE	-2.26
WBGene00025528	CBG02481	347.775	1.03446	0.159351	6.49171	8.48677e-11	2.3628e-09	chrII	10021824	10023694	+	WBGene00016119	C25H3.10	FALSE	FALSE	FALSE	-2.39
WBGene00025578	CBG02542	18.312	1.42769	0.425406	3.35607	0.000790599	0.0040058	chrII	9770161	9771480	-	WBGene00022876	ZK1248.5	FALSE	FALSE	FALSE	-2.41
WBGene00025650	CBG02631	1764.23	2.86986	0.230325	12.46	1.2333e-35	2.31083e-33	chrII	9400812	9403997	+	WBGene00016315	C32D5.7	FALSE	TRUE	FALSE	-2.24
WBGene00025747	CBG02751	117.561	1.05237	0.342358	3.07389	0.00211284	0.00926258	chrII	8869962	8870905	-	WBGene00016125	C26B2.2	FALSE	FALSE	FALSE	-2.28
WBGene00025822	CBG02852	54.0594	2.46539	0.378234	6.51816	7.11761e-11	2.02679e-09	chrII	8415513	8418562	+	WBGene00016765	C49C8.1	FALSE	FALSE	TRUE	-1.88
WBGene00025833	CBG02863	6388.92	1.88966	0.0676074	27.9506	6.48842e-172	4.86294e-169	chrII	8382151	8386374	-	WBGene00010053	F54D5.9	FALSE	FALSE	TRUE	-2.04
WBGene00025873	CBG02912	64.0027	1.34227	0.268234	5.00412	5.61168e-07	7.00973e-06	chrII	8233827	8234672	-	NaN	NaN	FALSE	FALSE	FALSE	-2.19
WBGene00026035	CBG03104	2106.05	1.1214	0.159593	7.02662	2.11589e-12	7.55152e-11	chrII	7438825	7441922	+	WBGene00014058	ZK673.2	FALSE	TRUE	FALSE	-1.85
WBGene00026041	CBG03111	8.25084	1.55285	0.423254	3.66883	0.00024366	0.00145814	chrII	7389633	7394380	+	NaN	NaN	FALSE	TRUE	FALSE	-1.65
WBGene00026059	CBG03137	151.481	1.0055	0.168135	5.98032	2.22706e-09	4.63649e-08	chrII	7267596	7268992	+	WBGene00008739	F13D12.3	FALSE	TRUE	FALSE	-2.29
WBGene00026097	CBG03186	1075.4	1.17263	0.156998	7.4691	8.0744e-14	3.59359e-12	chrII	7102780	7103450	+	WBGene00009785	F46C5.10	FALSE	TRUE	FALSE	-2.33
WBGene00026112	CBG03210	450.127	1.95429	0.218389	8.94864	3.59888e-19	2.71904e-17	chrII	6997499	6999171	-	WBGene00007180	B0457.6	FALSE	TRUE	FALSE	-2.29
WBGene00026359	CBG03503	6.69583	1.49489	0.427875	3.49375	0.000476283	0.00259296	chrIV	14261754	14267298	+	NaN	NaN	FALSE	FALSE	FALSE	-1.06
WBGene00026420	CBG03582	22.8996	1.57134	0.369154	4.25659	2.07565e-05	0.000172774	chrIII	10988454	10990148	+	NaN	NaN	FALSE	FALSE	FALSE	-1.84
WBGene00026436	CBG03602	21.8103	1.24696	0.383186	3.2542	0.00113712	0.00546455	chrIII	11061125	11064325	+	NaN	NaN	FALSE	FALSE	FALSE	-2.37
WBGene00026446	CBG03616	80.7468	1.11683	0.261747	4.26683	1.98267e-05	0.000165771	chrIII	11140330	11144691	+	NaN	NaN	FALSE	TRUE	FALSE	-1.81
WBGene00026461	CBG03643	20.737	2.38228	0.408765	5.82798	5.61008e-09	1.07701e-07	chrIII	11294338	11296933	-	WBGene00008912	F17C8.7	FALSE	FALSE	TRUE	-2.1
WBGene00026474	CBG03663	30.0971	2.71447	0.368191	7.37244	1.67538e-13	7.16703e-12	chrII	2307412	2310875	+	NaN	NaN	FALSE	FALSE	FALSE	-1.05
WBGene00026502	CBG03697	18.5859	3.28349	0.416152	7.89014	3.01859e-15	1.58874e-13	chrII	2514442	2515823	+	NaN	NaN	FALSE	TRUE	FALSE	-0.98
WBGene00026536	CBG03737	31.3579	1.14074	0.328862	3.46874	0.000522903	0.00280574	chrI	5707628	5709375	+	WBGene00219310	C17E4.19	FALSE	FALSE	FALSE	-2.36
WBGene00026888	CBG04161	4.30413	1.32253	0.404226	3.27176	0.00106881	0.00518546	chrI	4181699	4182848	+	WBGene00011378	T02E1.6	FALSE	FALSE	TRUE	-2.19
WBGene00026889	CBG04162	11.7066	1.84307	0.424821	4.33846	1.43486e-05	0.00012493	chrI	4180447	4181610	-	WBGene00016949	C55C2.3	FALSE	TRUE	FALSE	-2.16
WBGene00027052	CBG04361	5.31105	1.37118	0.405982	3.37745	0.000731626	0.00375369	chrI	13766311	13767543	-	NaN	NaN	FALSE	TRUE	FALSE	-0.71
WBGene00027053	CBG04362	19.1043	2.66355	0.412302	6.4602	1.04563e-10	2.84353e-09	chrI	13767579	13769812	+	WBGene00023490	F36A2.14	FALSE	FALSE	TRUE	-0.75
WBGene00027069	CBG04386	2521.6	3.14612	0.396558	7.93356	2.12944e-15	1.14984e-13	chrIV	11953480	11955348	-	WBGene00016845	C50F7.5	FALSE	TRUE	FALSE	-1.76
WBGene00027116	CBG04450	15.1782	1.80262	0.416627	4.32669	1.51365e-05	0.000131059	chrIV	12224793	12227084	-	WBGene00011295	R102.8	FALSE	FALSE	TRUE	-2.06
WBGene00027153	CBG04491	593.66	1.81034	0.200163	9.04433	1.50587e-19	1.21097e-17	chrX	6517730	6520608	-	NaN	NaN	FALSE	TRUE	FALSE	-1.67
WBGene00027197	CBG04552	35.7783	3.48477	0.409186	8.51635	1.6466e-17	1.1219e-15	chrV	14385982	14388659	-	WBGene00013049	Y50E8A.6	FALSE	FALSE	FALSE	-1.68
WBGene00027198	CBG04553	45.2142	3.89882	0.392307	9.93818	2.83969e-23	3.05789e-21	chrV	14388793	14392254	-	NaN	NaN	FALSE	TRUE	FALSE	-1.62
WBGene00027200	CBG04555	50.6411	3.22031	0.360292	8.93806	3.96062e-19	2.96841e-17	chrV	14397098	14399040	+	WBGene00011133	R08A2.2	FALSE	TRUE	FALSE	-1.6
WBGene00027201	CBG04556	189.95	3.98698	0.236569	16.8533	9.9139e-64	3.3774e-61	chrV	14399041	14400629	-	WBGene00011136	R08A2.5	FALSE	FALSE	FALSE	-1.46
WBGene00027206	CBG04561	3491.39	2.59911	0.208317	12.4767	1.00033e-35	1.89325e-33	chrV	14414414	14416914	+	WBGene00008143	C47E8.4	FALSE	TRUE	TRUE	-0.93
WBGene00027207	CBG04562	347.522	1.58686	0.180519	8.79053	1.48851e-18	1.06859e-16	chrV	14416915	14420485	-	WBGene00008142	C47E8.3	FALSE	TRUE	FALSE	-0.65
WBGene00027225	CBG04582	1672.76	1.09375	0.138608	7.89097	2.99836e-15	1.58254e-13	chrV	14529534	14544283	-	WBGene00002915	let-805	FALSE	TRUE	FALSE	-1.09
WBGene00027226	CBG04583	1172.6	1.93019	0.159714	12.0853	1.26364e-33	2.17219e-31	chrV	14545847	14546961	+	NaN	NaN	FALSE	TRUE	FALSE	-1.46
WBGene00027233	CBG04591	115991	7.98645	0.12619	63.2893	0	0	chrV	14582083	14582703	-	NaN	NaN	FALSE	TRUE	FALSE	-1.67
WBGene00027234	CBG04592	88662.2	7.77234	0.165685	46.9103	0	0	chrV	14582821	14583585	+	WBGene00002018	hsp-16.41	FALSE	TRUE	TRUE	-1.59
WBGene00027235	CBG04593	37.6815	1.30319	0.371963	3.50356	0.000459089	0.00251225	chrV	14589056	14591792	+	WBGene00010979	R02D5.6	FALSE	TRUE	FALSE	-1.97
WBGene00027244	CBG04605	72.7492	3.56637	0.398087	8.95879	3.28259e-19	2.52074e-17	chrV	14633475	14633989	-	NaN	NaN	FALSE	TRUE	FALSE	-1.7
WBGene00027245	CBG04606	1449.75	5.7782	0.290055	19.9211	2.6732e-88	1.3181e-85	chrV	14634155	14634902	+	WBGene00008592	F08H9.4	FALSE	TRUE	FALSE	-1.67
WBGene00027246	CBG04607	87703.6	7.40269	0.198278	37.3349	4.46078e-305	5.22386e-302	chrV	14635582	14636282	-	WBGene00002018	hsp-16.41	FALSE	TRUE	TRUE	-1.71
WBGene00027247	CBG04608	86517.6	7.17791	0.185742	38.6446	0	0	chrV	14636390	14637098	+	NaN	NaN	FALSE	TRUE	FALSE	-1.7
WBGene00027332	CBG04712	30.4693	1.57269	0.4246	3.70394	0.000212277	0.00129432	chrV	14932135	14933654	+	WBGene00009599	F40G12.4	FALSE	FALSE	FALSE	-1.67
WBGene00027341	CBG04723	121.692	2.0064	0.295666	6.78604	1.15251e-11	3.72963e-10	chrV	14971930	14973571	+	WBGene00008390	D1086.3	FALSE	FALSE	FALSE	-1.61
WBGene00027344	CBG04726	18.6903	1.72911	0.392862	4.40132	1.07593e-05	9.65961e-05	chrV	14977186	14978006	+	WBGene00008388	D1086.1	FALSE	FALSE	FALSE	-1.33
WBGene00027374	CBG04762	37.4392	1.72247	0.351623	4.89864	9.65041e-07	1.13652e-05	chrV	15166358	15168910	+	NaN	NaN	FALSE	FALSE	FALSE	-1.74
WBGene00027375	CBG04763	36.1764	2.9357	0.420993	6.97328	3.0964e-12	1.07839e-10	chrV	15174619	15177008	-	NaN	NaN	TRUE	TRUE	FALSE	-1.55
WBGene00027376	CBG04764	350.088	4.34973	0.188348	23.0941	5.30342e-118	3.01122e-115	chrV	15178599	15179315	-	WBGene00045355	D1086.17	FALSE	FALSE	FALSE	-1.43
WBGene00027387	CBG04776	12.9028	1.9222	0.411122	4.67548	2.93261e-06	3.0646e-05	chrV	15242057	15245648	-	WBGene00012233	clpr-1	FALSE	TRUE	FALSE	-1.95
WBGene00027403	CBG04794	27.8335	1.45334	0.373172	3.89455	9.83809e-05	0.000667644	chrV	15313879	15314182	+	NaN	NaN	FALSE	TRUE	FALSE	-1.13
WBGene00027413	CBG04808	18.97	1.53531	0.427365	3.5925	0.000327525	0.00187671	chrV	15339726	15340059	-	NaN	NaN	FALSE	TRUE	FALSE	-1.37
WBGene00027415	CBG04810	25.0604	1.70315	0.424309	4.01395	5.97114e-05	0.000429982	chrV	15344754	15345246	+	NaN	NaN	FALSE	TRUE	FALSE	-1.39
WBGene00027433	CBG04829	149.895	1.34418	0.333874	4.02602	5.67296e-05	0.000412313	chrV	15403779	15404683	-	NaN	NaN	FALSE	TRUE	FALSE	-1.83
WBGene00027438	CBG04836	6.1344	1.43426	0.427832	3.3524	0.000801143	0.00404719	chrV	15448490	15451978	-	NaN	NaN	FALSE	FALSE	FALSE	-1.7
WBGene00027447	CBG04847	31.6957	1.76507	0.3137	5.62663	1.83763e-08	3.19404e-07	chrV	15480116	15482300	-	WBGene00013940	nhr-248	FALSE	TRUE	FALSE	-1.4
WBGene00027525	CBG04939	408.256	1.03563	0.313376	3.30476	0.000950572	0.0046846	chrV	15748714	15750896	-	NaN	NaN	FALSE	TRUE	FALSE	-1.67
WBGene00027568	CBG05008	61.5252	4.06361	0.346244	11.7363	8.30571e-32	1.35325e-29	chrX	11661824	11664223	-	WBGene00015780	C14F11.4	FALSE	FALSE	TRUE	-2.37
WBGene00027668	CBG05149	260.917	1.67052	0.357775	4.66921	3.02366e-06	3.14922e-05	chrI	1306588	1308961	-	WBGene00021215	Y18H1A.11	TRUE	FALSE	FALSE	-1.89
WBGene00027673	CBG05156	86.0305	1.65095	0.272473	6.05911	1.36874e-09	2.96486e-08	chrI	1269847	1276754	+	WBGene00044434	Y18H1A.15	FALSE	TRUE	FALSE	-0.67
WBGene00027736	CBG05229	166.104	2.28462	0.395744	5.77299	7.78786e-09	1.44191e-07	chrX	16906655	16909352	+	WBGene00010998	R03G8.3	FALSE	TRUE	FALSE	-2.19
WBGene00027740	CBG05235	644.88	1.09479	0.133996	8.17026	3.07714e-16	1.83036e-14	chrX	16932546	16935303	+	WBGene00008926	F17H10.2	FALSE	TRUE	FALSE	-2.35
WBGene00027780	CBG05297	15.7983	1.84903	0.396394	4.66464	3.09164e-06	3.21287e-05	chrX	17197223	17203366	-	NaN	NaN	FALSE	FALSE	FALSE	-1.13
WBGene00027781	CBG05298	24.188	1.43204	0.341595	4.19222	2.76236e-05	0.000220718	chrX	17205814	17210596	-	NaN	NaN	FALSE	FALSE	FALSE	-1.76
WBGene00027794	CBG05325	26.8335	3.0277	0.374923	8.07553	6.71865e-16	3.82636e-14	chrX	17338805	17339357	+	NaN	NaN	FALSE	FALSE	FALSE	-1.84
WBGene00027831	CBG05371	147.94	1.13371	0.223013	5.08359	3.70364e-07	4.86984e-06	chrIV	7205526	7206957	-	WBGene00015929	C17H12.3	FALSE	FALSE	TRUE	-2.19
WBGene00027873	CBG05419	28.0064	2.1961	0.354999	6.18623	6.16209e-10	1.42542e-08	chrIV	7035407	7039698	+	NaN	NaN	FALSE	FALSE	FALSE	-2.25
WBGene00027888	CBG05437	29.1297	1.18238	0.341105	3.46632	0.000527633	0.00282928	chrIV	6959929	6961712	-	NaN	NaN	FALSE	FALSE	FALSE	-2.29
WBGene00027924	CBG05481	28.0124	1.47275	0.343575	4.28654	1.81475e-05	0.000153098	chrIV	6793665	6794285	-	WBGene00003237	mif-4	FALSE	TRUE	FALSE	-1.98
WBGene00027952	CBG05513	77.9184	2.34639	0.33011	7.1079	1.17823e-12	4.41528e-11	chrIV	6684862	6687991	-	NaN	NaN	FALSE	TRUE	FALSE	-1.81
WBGene00027965	CBG05532	58.415	2.49176	0.402363	6.19282	5.90965e-10	1.37211e-08	chrV	18705904	18706334	-	WBGene00013081	Y51A2D.14	FALSE	TRUE	FALSE	-1.93
WBGene00027978	CBG05550	17.4613	1.28767	0.414138	3.10927	0.00187549	0.00838489	chrV	18773811	18776420	+	NaN	NaN	FALSE	FALSE	FALSE	-1.99
WBGene00028072	CBG05668	3074.83	2.02009	0.0822593	24.5577	3.58259e-133	2.31473e-130	chrV	19302228	19308450	+	WBGene00012813	Y43F8B.2	FALSE	FALSE	TRUE	-2.39
WBGene00028087	CBG05684	21.8109	1.51907	0.349839	4.34219	1.41067e-05	0.00012334	chrV	19394935	19397457	-	WBGene00010297	F59A1.11	TRUE	FALSE	TRUE	-2.34
WBGene00028099	CBG05699	1899.43	1.37978	0.177706	7.76438	8.20483e-15	4.14377e-13	chrV	18699981	18704371	-	WBGene00013080	Y51A2D.13	FALSE	FALSE	FALSE	-1.9
WBGene00028205	CBG05827	134.577	1.40835	0.274108	5.13794	2.77764e-07	3.76863e-06	chrIV	7883351	7885158	+	WBGene00018345	F42C5.3	FALSE	FALSE	FALSE	-2.06
WBGene00028221	CBG05845	71.3411	2.41051	0.260645	9.24827	2.28153e-20	1.98832e-18	chrIV	7818414	7830813	+	WBGene00021496	Y40C5A.3	FALSE	FALSE	TRUE	-1.77
WBGene00028235	CBG05867	15.47	1.2989	0.424508	3.05978	0.00221499	0.0096159	chrIV	7726881	7728144	-	WBGene00015210	B0496.1	FALSE	FALSE	TRUE	-2.11
WBGene00028282	CBG05925	24.4317	2.58729	0.405825	6.37538	1.82514e-10	4.74308e-09	chrIV	7560094	7562213	+	WBGene00018471	F45E4.6	FALSE	FALSE	TRUE	-2.22
WBGene00028499	CBG06191	140.314	1.95296	0.28466	6.86069	6.85282e-12	2.2902e-10	chrIV	8952433	8955977	-	WBGene00014089	ZK822.1	FALSE	FALSE	TRUE	-2.18
WBGene00028504	CBG06196	94.6074	1.27948	0.281014	4.5531	5.28621e-06	5.1722e-05	chrIV	8971297	8972375	-	WBGene00014093	ZK829.1	FALSE	TRUE	FALSE	-1.54
WBGene00028505	CBG06197	63.301	1.07086	0.279098	3.83686	0.000124616	0.000818414	chrIV	8972645	8974814	-	WBGene00014094	ZK829.3	FALSE	FALSE	TRUE	-1.58
WBGene00028719	CBG06449	5772.54	1.57426	0.232403	6.77382	1.25423e-11	4.0379e-10	chrV	6529997	6532194	-	WBGene00020999	W03F9.1	FALSE	TRUE	TRUE	-2.15
WBGene00028864	CBG06615	38.783	1.22961	0.319602	3.8473	0.000119426	0.000787917	chrV	7042917	7044431	-	NaN	NaN	FALSE	FALSE	FALSE	-1.73
WBGene00028882	CBG06637	428.851	1.32701	0.212147	6.25514	3.97155e-10	9.51933e-09	chrV	7145221	7147249	+	WBGene00020962	W02H5.8	TRUE	TRUE	FALSE	-2.25
WBGene00028893	CBG06648	17.1971	1.78416	0.426278	4.18544	2.84608e-05	0.000226154	chrV	7186028	7187694	-	WBGene00016050	srt-29	FALSE	FALSE	TRUE	-2.04
WBGene00028990	CBG06766	8.47602	1.77496	0.427759	4.14944	3.33284e-05	0.000260089	chrV	7616580	7617794	-	WBGene00015682	C10G8.3	FALSE	TRUE	TRUE	-2
WBGene00029012	CBG06796	12.5475	1.58512	0.407298	3.89179	9.95064e-05	0.00067333	chrIII	10628629	10629658	-	NaN	NaN	FALSE	FALSE	FALSE	-2.03
WBGene00029013	CBG06797	12.3954	1.4339	0.411711	3.48279	0.000496215	0.00268561	chrIII	10627467	10627919	-	WBGene00012841	Y43F11A.1	FALSE	FALSE	FALSE	-2.03
WBGene00029017	CBG06801	10.008	1.25369	0.410908	3.05102	0.00228065	0.00985303	chrIII	10622813	10623430	-	WBGene00013886	ZC412.5	FALSE	FALSE	TRUE	-1.96
WBGene00029031	CBG06820	1032.26	1.65367	0.181942	9.089	9.99568e-20	8.143e-18	chrIII	10498905	10501697	+	WBGene00011298	R107.2	FALSE	TRUE	TRUE	-2.36
WBGene00029033	CBG06824	20947	4.16116	0.234376	17.7542	1.598e-70	5.87092e-68	chrIII	10487771	10490456	+	WBGene00011300	R107.5	FALSE	TRUE	TRUE	-1.98
WBGene00029183	CBG07008	29.3224	1.28151	0.378105	3.3893	0.000700721	0.00361991	chrII	16444573	16445581	+	WBGene00017743	F23F1.2	FALSE	TRUE	TRUE	-2.44
WBGene00029256	CBG07092	46.3476	3.49948	0.355	9.85766	6.35105e-23	6.57457e-21	chrII	16149882	16151930	-	WBGene00021096	W08F4.7	FALSE	TRUE	FALSE	-2.12
WBGene00029346	CBG07223	54.6415	1.59789	0.35643	4.48303	7.3589e-06	6.9393e-05	chrII	15549667	15550399	+	NaN	NaN	TRUE	FALSE	FALSE	-1.52
WBGene00029353	CBG07231	20.9444	2.17766	0.426125	5.11038	3.21512e-07	4.29685e-06	chrX	20319703	20321053	+	NaN	NaN	FALSE	TRUE	FALSE	-2.41
WBGene00029418	CBG07345	21.53	1.48636	0.407746	3.64529	0.000267087	0.00157079	chrX	19747606	19751473	-	NaN	NaN	FALSE	FALSE	FALSE	-1.96
WBGene00029468	CBG07411	601.673	1.39113	0.196646	7.07428	1.50231e-12	5.563e-11	chrX	19325369	19328211	-	WBGene00010028	F54B11.5	FALSE	FALSE	FALSE	-2.47
WBGene00029496	CBG07444	12.4202	2.66868	0.42312	6.30715	2.84225e-10	7.06303e-09	chrX	19178734	19179165	-	NaN	NaN	FALSE	FALSE	FALSE	-1.23
WBGene00029497	CBG07445	10.2821	1.84475	0.417806	4.41532	1.00861e-05	9.12963e-05	chrX	19176971	19177453	-	NaN	NaN	FALSE	FALSE	FALSE	-1.17
WBGene00029516	CBG07479	328.585	1.94511	0.159836	12.1694	4.52439e-34	8.15129e-32	chrX	19022545	19024451	+	WBGene00010935	M163.1	FALSE	TRUE	FALSE	-2.1
WBGene00029530	CBG07509	25.3302	1.43145	0.383348	3.73409	0.000188395	0.00116925	chrX	18874245	18878239	-	NaN	NaN	FALSE	FALSE	FALSE	-1.67
WBGene00029541	CBG07534	674.039	2.2043	0.300628	7.33233	2.26193e-13	9.41818e-12	chrX	18799659	18804559	-	WBGene00011984	T24C2.5	FALSE	TRUE	FALSE	-2.45
WBGene00029600	CBG07612	1153.37	1.16928	0.208293	5.61365	1.98097e-08	3.42728e-07	chrX	18372234	18376008	-	WBGene00011680	T10B10.3	FALSE	TRUE	FALSE	-2.23
WBGene00029607	CBG07621	211.604	1.61986	0.306937	5.27748	1.30969e-07	1.89203e-06	chrX	18344316	18345513	-	WBGene00007525	C11G10.1	FALSE	FALSE	TRUE	-2.4
WBGene00029618	CBG07638	128.035	1.13404	0.176452	6.4269	1.30237e-10	3.49105e-09	chrX	18265877	18271253	-	WBGene00010434	H40L08.3	FALSE	FALSE	TRUE	-2.22
WBGene00029629	CBG07652	5729.6	1.7426	0.185711	9.3834	6.38808e-21	5.78229e-19	chrX	18209070	18210910	+	WBGene00008975	F20D1.3	FALSE	TRUE	FALSE	-1.8
WBGene00029654	CBG07687	3593.82	4.31899	0.150905	28.6205	3.73091e-180	3.03939e-177	chrX	17989025	17994549	-	WBGene00012444	Y15E3A.5	FALSE	FALSE	TRUE	-2.25
WBGene00029656	CBG07689	148.72	1.66992	0.28053	5.95274	2.63695e-09	5.40467e-08	chrX	17964619	17967977	-	WBGene00007878	C33A11.2	FALSE	FALSE	FALSE	-1.97
WBGene00029657	CBG07690	164.785	1.06995	0.238827	4.48001	7.46408e-06	7.02554e-05	chrX	17960639	17964633	-	WBGene00007878	C33A11.2	FALSE	FALSE	FALSE	-1.76
WBGene00029817	CBG07930	77.691	1.36476	0.275551	4.95283	7.31403e-07	8.94267e-06	chrI	13957327	13960125	+	WBGene00012502	clec-107	FALSE	TRUE	TRUE	-1.2
WBGene00029851	CBG07970	15.5839	1.85131	0.425103	4.35497	1.33084e-05	0.000117125	chrI	14202723	14208096	+	NaN	NaN	FALSE	FALSE	FALSE	-1.71
WBGene00029859	CBG07982	8.76069	1.85672	0.427948	4.33865	1.43362e-05	0.00012488	chrI	14276677	14278392	+	NaN	NaN	FALSE	FALSE	FALSE	-2.13
WBGene00029866	CBG07991	27.7159	1.19947	0.318696	3.76368	0.00016743	0.00105592	chrI	14317708	14320087	+	NaN	NaN	FALSE	FALSE	FALSE	-1.45
WBGene00029898	CBG08027	14.4407	1.54779	0.398818	3.88095	0.000104051	0.000698534	chrI	14500785	14502629	+	WBGene00010254	F58E6.5	FALSE	FALSE	TRUE	-0.65
WBGene00029900	CBG08031	16.5116	1.67477	0.427607	3.91661	8.98026e-05	0.000620439	chrI	14513703	14513966	-	NaN	NaN	FALSE	TRUE	FALSE	-0.33
WBGene00029999	CBG08143	55.2584	2.34623	0.327889	7.15557	8.33263e-13	3.21914e-11	chrX	436381	439696	+	WBGene00017424	F13C5.3	FALSE	FALSE	FALSE	-2.53
WBGene00030050	CBG08211	712.474	1.10189	0.219668	5.01617	5.27109e-07	6.64633e-06	chrI	5993552	5994669	+	WBGene00008317	C54G4.7	FALSE	TRUE	FALSE	-2.49
WBGene00030063	CBG08226	17.2601	2.25054	0.420947	5.34637	8.97366e-08	1.34512e-06	chrI	6032327	6036756	+	WBGene00010366	H05L14.1	FALSE	FALSE	FALSE	-2.3
WBGene00030087	CBG08261	45.4905	1.64354	0.393726	4.17433	2.98867e-05	0.000236481	chrI	6194562	6198023	+	WBGene00013700	Y106G6D.3	FALSE	FALSE	FALSE	-2.22
WBGene00030093	CBG08268	18.8069	1.18763	0.364449	3.2587	0.00111922	0.00539152	chrI	6232156	6233598	-	NaN	NaN	FALSE	FALSE	FALSE	-1.52
WBGene00030115	CBG08297	45.5842	1.02787	0.280943	3.65862	0.000253575	0.00150785	chrIV	12837463	12838726	+	NaN	NaN	TRUE	FALSE	FALSE	-1.95
WBGene00030130	CBG08315	19.7993	1.44965	0.397866	3.64358	0.000268874	0.00157928	chrIV	12765669	12766553	+	NaN	NaN	FALSE	TRUE	FALSE	-2.07
WBGene00030131	CBG08316	1051.91	1.86889	0.122934	15.2024	3.40881e-52	9.39276e-50	chrIV	12762043	12764900	+	WBGene00016987	CC8.2	FALSE	FALSE	FALSE	-1.97
WBGene00030150	CBG08338	114.222	1.58672	0.272314	5.8268	5.65009e-09	1.08152e-07	chrIV	12675462	12675824	+	NaN	NaN	FALSE	TRUE	FALSE	-1.84
WBGene00030168	CBG08364	187.109	1.0719	0.202825	5.28485	1.25806e-07	1.82307e-06	chrIV	12565631	12569183	+	WBGene00011596	T07G12.5	FALSE	FALSE	FALSE	-1.73
WBGene00030220	CBG08431	120.6	2.26341	0.294935	7.67426	1.66373e-14	8.07598e-13	chrI	11513695	11514605	+	NaN	NaN	TRUE	FALSE	FALSE	-1.47
WBGene00030260	CBG08477	74.7932	1.97829	0.382239	5.17554	2.27256e-07	3.12865e-06	chrI	11338932	11339499	-	WBGene00017490	pud-2.1	FALSE	FALSE	FALSE	-2.08
WBGene00030285	CBG08508	39.1807	1.51695	0.317965	4.77081	1.83489e-06	2.01644e-05	chrI	11172010	11175827	-	WBGene00020353	T08B6.4	FALSE	FALSE	TRUE	-1.86
WBGene00030362	CBG08603	1247.42	1.9242	0.424011	4.5381	5.67626e-06	5.49793e-05	chrV	8043253	8045805	-	WBGene00013900	ugt-18	FALSE	FALSE	FALSE	-2.15
WBGene00030494	CBG08756	67.2447	2.01951	0.248497	8.12688	4.40499e-16	2.57122e-14	chrI	15404166	15407066	-	WBGene00013198	Y54E5A.2	FALSE	TRUE	TRUE	-2.38
WBGene00030549	CBG08823	14.066	2.67724	0.420373	6.36873	1.90597e-10	4.91904e-09	chrV	1825786	1826067	-	NaN	NaN	FALSE	FALSE	FALSE	-1.79
WBGene00030551	CBG08826	7131.25	1.17808	0.138794	8.48797	2.10278e-17	1.42237e-15	chrV	1832452	1837860	-	WBGene00016508	C37H5.5	FALSE	TRUE	FALSE	-1.77
WBGene00030554	CBG08830	2186.4	2.31883	0.15762	14.7115	5.4397e-49	1.41561e-46	chrV	1844145	1846778	+	WBGene00019842	R02F11.4	FALSE	FALSE	FALSE	-1.84
WBGene00030555	CBG08831	1396.13	1.37403	0.200949	6.83768	8.04881e-12	2.6645e-10	chrV	1851690	1854598	+	WBGene00019841	R02F11.3	FALSE	TRUE	FALSE	-1.54
WBGene00030558	CBG08835	11.9862	2.47153	0.4229	5.84424	5.0889e-09	9.85028e-08	chrV	1865878	1867004	+	NaN	NaN	FALSE	FALSE	FALSE	-2.22
WBGene00030579	CBG08858	28.7198	1.7823	0.370692	4.80804	1.52419e-06	1.71628e-05	chrV	1952157	1953862	+	WBGene00019235	H23N18.4	FALSE	FALSE	FALSE	-1.63
WBGene00030624	CBG08921	178.93	1.12973	0.243296	4.64343	3.4267e-06	3.52007e-05	chrX	20976462	20977926	+	NaN	NaN	FALSE	TRUE	FALSE	-1.99
WBGene00030646	CBG08965	7.16813	1.50739	0.425936	3.53901	0.000401631	0.00223636	chrIII	4441123	4442808	-	WBGene00043743	Y59E9AL.2	FALSE	FALSE	FALSE	-2.41
WBGene00030659	CBG08981	24.589	1.15256	0.349073	3.30179	0.000960714	0.00472341	chrIII	4395496	4399275	+	WBGene00010245	F58D5.6	FALSE	TRUE	TRUE	-2.16
WBGene00030691	CBG09020	51.8381	2.47272	0.370353	6.67666	2.44447e-11	7.52087e-10	chrIII	4262354	4266256	+	NaN	NaN	FALSE	FALSE	FALSE	-1.92
WBGene00030722	CBG09055	36.8839	1.4464	0.325038	4.44994	8.58925e-06	7.94749e-05	chrIII	4096999	4101519	+	WBGene00016196	C28H8.5	FALSE	TRUE	FALSE	-2.05
WBGene00030729	CBG09062	116.309	1.23891	0.395698	3.13096	0.00174234	0.00787225	chrIII	4082658	4083677	+	WBGene00007332	C05C10.5	FALSE	TRUE	FALSE	-2.41
WBGene00030744	CBG09080	155.711	5.48271	0.302703	18.1125	2.53811e-73	9.90761e-71	chrIII	4025844	4027237	-	WBGene00015132	B0303.14	FALSE	TRUE	FALSE	-1.66
WBGene00030761	CBG09099	9.78011	1.85558	0.42792	4.33629	1.44908e-05	0.000125993	chrIII	3919166	3928812	+	WBGene00018255	F40H6.5	FALSE	FALSE	FALSE	-1.71
WBGene00030764	CBG09102	60.6357	2.44765	0.325677	7.51559	5.6655e-14	2.58337e-12	chrIII	3901434	3905993	+	WBGene00019506	K07H8.5	FALSE	TRUE	FALSE	-2.03
WBGene00030853	CBG09226	355.19	2.93736	0.177818	16.5189	2.68409e-61	8.11157e-59	chrIII	8245368	8247170	+	WBGene00013801	Y116A8C.24	FALSE	FALSE	TRUE	-2.46
WBGene00030912	CBG09307	5539.01	1.61581	0.164891	9.79923	1.13452e-22	1.16161e-20	chrV	11652881	11658120	-	WBGene00017834	F26F12.3	FALSE	FALSE	FALSE	-2.34
WBGene00030913	CBG09309	12.3412	1.27902	0.413321	3.09449	0.00197152	0.00873502	chrV	11650161	11651357	-	WBGene00019642	K11C4.1	FALSE	FALSE	TRUE	-2.45
WBGene00030918	CBG09315	576.816	1.35033	0.206245	6.54719	5.86306e-11	1.70056e-09	chrV	11623041	11624447	-	WBGene00045305	ZC250.4	FALSE	TRUE	FALSE	-2
WBGene00030965	CBG09367	55.0835	1.90145	0.278407	6.82975	8.50651e-12	2.80117e-10	chrV	11446945	11451208	-	WBGene00002215	klc-2	FALSE	TRUE	FALSE	-2.2
WBGene00031039	CBG09463	19.3914	1.35513	0.359608	3.76837	0.000164318	0.00103769	chrIV	6513269	6516845	-	WBGene00019255	H32C10.1	FALSE	FALSE	FALSE	-2.16
WBGene00031120	CBG09556	30.7817	1.24857	0.36652	3.40655	0.000657891	0.00342414	chrV	10790458	10790942	-	NaN	NaN	FALSE	TRUE	FALSE	-2.42
WBGene00031139	CBG09578	767.132	1.00294	0.197159	5.08694	3.6388e-07	4.80143e-06	chrV	10727772	10729212	-	WBGene00007097	B0024.4	FALSE	TRUE	FALSE	-2.42
WBGene00031199	CBG09641	158.48	1.62882	0.230679	7.06097	1.65344e-12	6.0391e-11	chrV	10477571	10478637	-	WBGene00008922	F17C11.11	FALSE	FALSE	TRUE	-2.23
WBGene00031228	CBG09680	2781.5	1.34871	0.194268	6.94254	3.85119e-12	1.32647e-10	chrV	10316344	10326330	+	WBGene00012117	T28B11.1	FALSE	FALSE	FALSE	-1.87
WBGene00031257	CBG09720	35.1347	1.36736	0.386012	3.54227	0.000396696	0.00221151	chrV	10203056	10207260	-	WBGene00007800	C29A12.6	FALSE	FALSE	TRUE	-2.32
WBGene00031311	CBG09791	217.807	4.64138	0.27251	17.0319	4.75954e-65	1.68263e-62	chrIII	8537758	8538460	+	WBGene00007928	C34C12.9	FALSE	TRUE	TRUE	-2.4
WBGene00031358	CBG09842	1442.34	1.4299	0.258049	5.54121	3.00384e-08	5.02976e-07	chrIII	8736496	8739619	-	WBGene00022178	Y71H2AM.13	FALSE	TRUE	FALSE	-2.19
WBGene00031479	CBG09990	2954.83	1.19613	0.106429	11.2388	2.63047e-29	3.91168e-27	chrIII	9272384	9274304	+	WBGene00014013	ZK632.4	FALSE	FALSE	FALSE	-2.33
WBGene00031481	CBG09992	27.8878	1.6503	0.391548	4.21481	2.49992e-05	0.000203039	chrIII	9276128	9278189	-	WBGene00012010	T25B9.4	FALSE	FALSE	TRUE	-2.29
WBGene00031588	CBG10117	179.352	1.99145	0.29236	6.81164	9.6493e-12	3.16082e-10	chrIII	9750645	9751431	+	NaN	NaN	FALSE	TRUE	FALSE	-2.29
WBGene00031609	CBG10143	139.829	1.15637	0.293492	3.94003	8.14716e-05	0.000568118	chrIII	9863716	9869626	-	WBGene00010795	M01A8.1	FALSE	TRUE	FALSE	-2.25
WBGene00031666	CBG10235	228.831	1.31827	0.266146	4.95317	7.30142e-07	8.93577e-06	chrX	20635662	20636164	-	NaN	NaN	FALSE	FALSE	FALSE	-2.06
WBGene00031722	CBG10313	5.57103	1.42064	0.422916	3.35916	0.000781798	0.0039655	chrII	14328891	14329995	+	NaN	NaN	FALSE	FALSE	FALSE	-1.39
WBGene00031725	CBG10316	105.799	2.37228	0.301063	7.87968	3.28219e-15	1.72265e-13	chrII	14320039	14323232	+	WBGene00012586	Y38E10A.8	FALSE	TRUE	FALSE	-1.14
WBGene00031726	CBG10317	2042.24	6.01718	0.196637	30.6005	1.20467e-205	1.18799e-202	chrII	14319214	14319444	+	WBGene00012587	Y38E10A.9	FALSE	TRUE	FALSE	-1.14
WBGene00031727	CBG10318	44.2899	4.18392	0.365121	11.459	2.11976e-30	3.33764e-28	chrII	14315443	14315673	-	WBGene00012587	Y38E10A.9	FALSE	FALSE	FALSE	-0.7
WBGene00031729	CBG10321	472.044	4.09343	0.294925	13.8796	8.42145e-44	1.94806e-41	chrII	14310898	14311131	-	WBGene00012591	nspe-1	FALSE	TRUE	TRUE	-1.3
WBGene00031732	CBG10324	713.621	4.33475	0.258288	16.7827	3.2682e-63	1.0558e-60	chrII	14300648	14301032	+	NaN	NaN	FALSE	FALSE	FALSE	-1.81
WBGene00031733	CBG10325	281.004	3.81245	0.300569	12.6841	7.24207e-37	1.41349e-34	chrII	14298806	14299106	-	WBGene00012587	Y38E10A.9	FALSE	TRUE	FALSE	-1.86
WBGene00031746	CBG10339	8724.78	3.45153	0.245931	14.0345	9.58145e-45	2.33153e-42	chrII	14228964	14232823	+	WBGene00012600	Y38E10A.22	FALSE	TRUE	FALSE	-1.75
WBGene00031747	CBG10341	32.5984	1.21062	0.310936	3.89347	9.88219e-05	0.000669908	chrII	14218232	14223665	+	NaN	NaN	FALSE	FALSE	FALSE	-1.62
WBGene00031748	CBG10342	96.623	1.02584	0.196904	5.20988	1.88967e-07	2.65021e-06	chrII	14214793	14217019	-	NaN	NaN	FALSE	TRUE	FALSE	-1.56
WBGene00031803	CBG10414	27.632	1.28322	0.322856	3.97461	7.04956e-05	0.000499575	chrV	3600545	3604061	+	WBGene00020236	lgc-1	FALSE	FALSE	FALSE	-1.6
WBGene00031814	CBG10425	320.183	1.65468	0.152327	10.8627	1.73492e-27	2.40795e-25	chrV	3570595	3573657	+	NaN	NaN	FALSE	TRUE	FALSE	-1.68
WBGene00031815	CBG10426	90.3462	1.42189	0.289586	4.91007	9.10453e-07	1.08381e-05	chrV	3562267	3566404	+	WBGene00021498	Y40C7B.1	FALSE	FALSE	FALSE	-2.09
WBGene00031831	CBG10444	51.1289	2.22759	0.371667	5.9935	2.05373e-09	4.29472e-08	chrV	3493136	3495608	-	WBGene00044457	C18H7.11	FALSE	FALSE	FALSE	-0.89
WBGene00031928	CBG10569	22.4495	2.58428	0.427615	6.04348	1.50826e-09	3.24086e-08	chrIV	16622242	16624104	-	WBGene00022094	Y69A2AR.23	FALSE	FALSE	FALSE	-2.31
WBGene00031929	CBG10571	13.5808	1.42473	0.400881	3.55399	0.000379427	0.00213	chrIV	16607510	16618558	+	WBGene00011657	T09E11.8	FALSE	TRUE	FALSE	-2.29
WBGene00031967	CBG10645	9.22505	1.43109	0.422107	3.39035	0.000698034	0.00360802	chrX	21289380	21291659	-	NaN	NaN	FALSE	FALSE	FALSE	-2.5
WBGene00032022	CBG10734	8.39097	1.32637	0.423132	3.13465	0.0017206	0.0077905	chrIV	13044016	13046102	+	WBGene00018148	F37C4.8	FALSE	TRUE	FALSE	-2.02
WBGene00032040	CBG10761	64.0867	1.90286	0.32519	5.85152	4.87094e-09	9.47734e-08	chrI	6309407	6311223	+	NaN	NaN	FALSE	TRUE	FALSE	-1.21
WBGene00032041	CBG10762	52.4126	1.93524	0.337807	5.72884	1.0112e-08	1.84308e-07	chrI	6311648	6312763	+	WBGene00009125	F25H5.2	FALSE	FALSE	TRUE	-1.5
WBGene00032090	CBG10819	51.8173	2.15839	0.287189	7.51556	5.66667e-14	2.58337e-12	chrI	6557706	6559819	-	WBGene00022634	ZC581.7	FALSE	TRUE	TRUE	-2.08
WBGene00032092	CBG10823	6.45724	1.66094	0.426776	3.89183	9.94901e-05	0.00067333	chrI	6565626	6566853	-	WBGene00018528	F47B3.4	FALSE	TRUE	FALSE	-2.4
WBGene00032093	CBG10824	15.2243	2.17368	0.412111	5.2745	1.33119e-07	1.92013e-06	chrI	6566986	6568766	+	WBGene00015024	B0205.10	FALSE	FALSE	FALSE	-2.22
WBGene00032115	CBG10850	152.309	1.17052	0.375223	3.11954	0.00181135	0.00813695	chrX	12068682	12073322	+	WBGene00044297	C25B8.8	FALSE	FALSE	FALSE	-2.26
WBGene00032190	CBG10961	374.698	2.65888	0.209903	12.6671	8.99342e-37	1.73721e-34	chrX	12519902	12520857	-	WBGene00015167	B0403.3	FALSE	TRUE	FALSE	-2.49
WBGene00032192	CBG10963	233.512	1.2236	0.179443	6.81887	9.17618e-12	3.0111e-10	chrX	12527246	12530359	-	WBGene00043982	B0403.6	FALSE	FALSE	FALSE	-2.32
WBGene00032268	CBG11081	20.3796	1.48913	0.420511	3.54124	0.000398255	0.00221888	chrII	4501418	4503313	+	WBGene00044333	C01G12.13	FALSE	TRUE	FALSE	-1.7
WBGene00032270	CBG11084	11.11	1.34557	0.426664	3.15371	0.00161211	0.00737453	chrII	4508162	4508468	-	WBGene00007246	nspb-10	FALSE	FALSE	FALSE	-1.78
WBGene00032277	CBG11091	24603	4.35589	0.108495	40.1482	0	0	chrII	4534366	4543897	-	NaN	NaN	FALSE	TRUE	FALSE	-1.62
WBGene00032301	CBG11124	30.3578	2.52637	0.380492	6.63974	3.14237e-11	9.49654e-10	chrII	4710004	4714161	+	NaN	NaN	FALSE	TRUE	FALSE	-1.93
WBGene00032345	CBG11182	1264.08	1.4437	0.160988	8.96776	3.02595e-19	2.33322e-17	chrII	5547809	5552263	-	WBGene00015088	B0252.3	TRUE	TRUE	FALSE	-2.4
WBGene00032392	CBG11237	18.1794	1.50315	0.36597	4.10731	4.00302e-05	0.000304896	chrII	5253154	5255972	+	WBGene00016000	C18H9.1	FALSE	FALSE	TRUE	-0.87
WBGene00032394	CBG11239	87.9518	1.06702	0.300996	3.54496	0.000392675	0.00219366	chrII	5236399	5240406	-	WBGene00016003	C18H9.5	FALSE	TRUE	FALSE	-1.37
WBGene00032434	CBG11297	29.173	2.00153	0.374881	5.3391	9.3409e-08	1.39015e-06	chrV	845378	847005	-	WBGene00020940	W02D7.4	FALSE	FALSE	FALSE	-1.29
WBGene00032439	CBG11302	46.5202	1.94444	0.42807	4.54235	5.56312e-06	5.40644e-05	chrV	820010	821273	+	NaN	NaN	FALSE	FALSE	FALSE	-1.89
WBGene00032445	CBG11308	451.66	1.07042	0.175324	6.10537	1.02562e-09	2.2742e-08	chrV	804293	807101	-	WBGene00015857	C16D9.1	FALSE	TRUE	FALSE	-1.35
WBGene00032521	CBG11405	325.992	6.28318	0.288181	21.8029	2.17593e-105	1.19913e-102	chrV	425954	426871	+	NaN	NaN	FALSE	TRUE	FALSE	-2.36
WBGene00032551	CBG11437	36.0866	2.14574	0.427873	5.01489	5.30638e-07	6.67776e-06	chrV	334685	335263	-	WBGene00007083	AH10.2	FALSE	FALSE	FALSE	-1.7
WBGene00032552	CBG11438	773.216	3.18457	0.196647	16.1944	5.52527e-59	1.61761e-56	chrV	332853	334638	+	WBGene00007366	C06B3.7	FALSE	FALSE	TRUE	-1.75
WBGene00032553	CBG11439	3878	2.0126	0.330137	6.09626	1.08582e-09	2.40073e-08	chrV	331219	332651	-	WBGene00007365	C06B3.6	FALSE	FALSE	FALSE	-1.79
WBGene00032555	CBG11441	3796.13	3.10852	0.414148	7.50583	6.10417e-14	2.76934e-12	chrV	326232	327440	+	WBGene00007363	stdh-1	FALSE	TRUE	FALSE	-1.67
WBGene00032557	CBG11443	8.17406	1.75836	0.426982	4.11811	3.8199e-05	0.000292974	chrV	322923	323799	+	WBGene00007360	C06B3.1	FALSE	TRUE	TRUE	-1.58
WBGene00032593	CBG11483	2788.25	1.32549	0.260607	5.08615	3.65396e-07	4.81125e-06	chrV	195593	197679	-	WBGene00009974	F53C11.4	FALSE	TRUE	FALSE	-1.52
WBGene00032597	CBG11487	80.8129	1.53399	0.241436	6.35362	2.10305e-10	5.38318e-09	chrV	186992	189010	+	NaN	NaN	FALSE	FALSE	FALSE	-1.83
WBGene00032613	CBG11503	16.2046	1.81519	0.399361	4.54524	5.48719e-06	5.34374e-05	chrV	138488	139876	+	WBGene00007512	C10C6.3	FALSE	FALSE	TRUE	-1.18
WBGene00032624	CBG11514	61.0628	1.36379	0.258776	5.27016	1.36305e-07	1.96282e-06	chrV	77090	79951	+	WBGene00022628	ZC513.3	FALSE	FALSE	TRUE	-1.2
WBGene00032637	CBG11530	39.2467	1.50804	0.304484	4.95277	7.3166e-07	8.94267e-06	chrV	35954	38969	+	WBGene00009988	F53F4.4	FALSE	FALSE	FALSE	-2.04
WBGene00032673	CBG11570	1704.53	1.40896	0.219913	6.40692	1.48493e-10	3.88591e-09	chrV	14139768	14140926	-	WBGene00007234	C01G10.7	FALSE	TRUE	FALSE	-2.12
WBGene00032676	CBG11573	443.684	1.49423	0.176508	8.46549	2.55071e-17	1.70688e-15	chrV	14144133	14147277	+	WBGene00007237	C01G10.10	FALSE	FALSE	FALSE	-2.07
WBGene00032704	CBG11602	124.177	1.19907	0.284109	4.22045	2.43811e-05	0.000198276	chrV	14243252	14245693	-	NaN	NaN	FALSE	FALSE	FALSE	-1.63
WBGene00032783	CBG11699	10.5705	1.34801	0.42094	3.20238	0.00136299	0.00638297	chrIII	2405389	2410833	-	WBGene00021249	Y22D7AL.11	FALSE	TRUE	FALSE	-1.28
WBGene00032797	CBG11717	25.2301	1.4512	0.399193	3.63532	0.000277634	0.00162259	chrIII	2331294	2338720	-	WBGene00015243	B0524.4	FALSE	FALSE	TRUE	-2.06
WBGene00032812	CBG11735	371.722	1.01287	0.188992	5.35932	8.35373e-08	1.26981e-06	chrIII	2191294	2194991	-	WBGene00021260	Y22D7AR.6	FALSE	TRUE	FALSE	-2
WBGene00032827	CBG11752	11.6497	1.33578	0.426308	3.13337	0.00172813	0.00781748	chrIII	2089307	2093014	-	WBGene00014179	ZK1010.5	FALSE	TRUE	TRUE	-1.02
WBGene00032866	CBG11801	11.2578	1.44428	0.40358	3.57868	0.000345331	0.00195897	chrX	7427452	7429476	-	NaN	NaN	FALSE	TRUE	FALSE	-2.32
WBGene00032911	CBG11869	7471.14	2.16693	0.337287	6.42458	1.32235e-10	3.52445e-09	chrI	215729	217066	-	WBGene00012140	T28F4.5	FALSE	TRUE	TRUE	-2.11
WBGene00032953	CBG11924	10.4291	2.05359	0.420629	4.88219	1.04916e-06	1.22633e-05	chrI	7111962	7112958	+	NaN	NaN	FALSE	TRUE	FALSE	-2.22
WBGene00032954	CBG11925	57.6723	3.48768	0.36894	9.45326	3.2844e-21	3.01665e-19	chrI	7111612	7116066	-	NaN	NaN	FALSE	TRUE	FALSE	-2.39
WBGene00033021	CBG12006	13.7804	1.60203	0.410502	3.90262	9.51588e-05	0.000650433	chrI	7464847	7467329	+	WBGene00020003	R11E3.1	FALSE	TRUE	FALSE	-2.37
WBGene00033086	CBG12081	9.08183	1.66936	0.426484	3.91424	9.06887e-05	0.000625409	chrI	7795705	7796136	+	WBGene00022162	Y71G12B.27	FALSE	FALSE	FALSE	-2.16
WBGene00033087	CBG12082	180.206	1.00383	0.199421	5.03374	4.81e-07	6.14349e-06	chrI	7796665	7798278	-	WBGene00017908	F28H1.1	FALSE	FALSE	FALSE	-2.4
WBGene00033423	CBG12477	26.3297	2.38095	0.378569	6.28935	3.18805e-10	7.82891e-09	chrI	9157706	9159578	-	WBGene00015634	C09D4.3	FALSE	FALSE	TRUE	-2.48
WBGene00033480	CBG12546	13.0415	1.89167	0.411997	4.59146	4.40154e-06	4.39849e-05	chrI	9423980	9425374	-	WBGene00009101	F25B3.4	FALSE	FALSE	FALSE	-2.29
WBGene00033528	CBG12606	45.9948	1.34533	0.279094	4.82035	1.43306e-06	1.62243e-05	chrI	9615042	9616481	+	WBGene00022586	ZC308.4	FALSE	FALSE	FALSE	-2.38
WBGene00033586	CBG12671	8.04407	1.5944	0.414915	3.84273	0.000121674	0.000800493	chrI	9831343	9834021	-	WBGene00020414	T10E9.4	FALSE	TRUE	TRUE	-1.91
WBGene00033644	CBG12739	11.1799	1.77846	0.428008	4.1552	3.24998e-05	0.000254258	chrI	10156232	10158392	+	WBGene00019773	M04G7.2	FALSE	FALSE	FALSE	-1.76
WBGene00033654	CBG12753	237.629	1.60006	0.198929	8.04335	8.7412e-16	4.93325e-14	chrI	10210963	10213499	-	WBGene00012456	Y17D7C.2	TRUE	TRUE	TRUE	-2.29
WBGene00033673	CBG12780	23.6749	1.33488	0.420936	3.17121	0.00151806	0.00699382	chrI	10331428	10335336	-	WBGene00015236	B0511.11	FALSE	TRUE	FALSE	-2.37
WBGene00033706	CBG12815	70.7366	1.09613	0.263083	4.16648	3.09339e-05	0.00024384	chrI	10472465	10472840	-	WBGene00044644	B0205.13	FALSE	FALSE	TRUE	-2.58
WBGene00033716	CBG12828	34.9584	2.10761	0.427676	4.92806	8.30495e-07	9.97499e-06	chrI	10529848	10531981	-	NaN	NaN	FALSE	FALSE	FALSE	-2.31
WBGene00033717	CBG12830	41.5097	2.47456	0.427988	5.78185	7.38848e-09	1.37476e-07	chrI	10534730	10538258	+	WBGene00019081	F59A3.8	FALSE	FALSE	FALSE	-2.31
WBGene00033733	CBG12861	7.76355	1.5475	0.421414	3.67216	0.000240511	0.00144161	chrI	10691225	10691942	-	WBGene00010142	F56A8.8	FALSE	TRUE	TRUE	-1.85
WBGene00033790	CBG12926	21.1144	1.43591	0.393212	3.65175	0.000260463	0.00154119	chrV	18423220	18427092	+	WBGene00013076	Y51A2D.8	FALSE	TRUE	FALSE	-1.91
WBGene00033815	CBG12962	17.7176	1.20427	0.378818	3.17903	0.00147766	0.00683292	chrII	6515573	6517026	+	WBGene00015516	C06A8.6	FALSE	TRUE	TRUE	-2.49
WBGene00033816	CBG12963	751.286	1.08916	0.124119	8.77512	1.70717e-18	1.21624e-16	chrII	6507966	6515013	-	WBGene00015517	C06A8.8	FALSE	FALSE	TRUE	-2.55
WBGene00033818	CBG12965	38.9089	3.62988	0.394765	9.19505	3.74829e-20	3.15438e-18	chrII	6503871	6505412	-	WBGene00015066	B0228.9	FALSE	FALSE	TRUE	-2.2
WBGene00033819	CBG12966	23.9987	1.86796	0.418054	4.46823	7.88678e-06	7.38504e-05	chrII	6501226	6503304	-	WBGene00015065	B0228.8	FALSE	FALSE	TRUE	-2.14
WBGene00033823	CBG12971	30.802	1.73696	0.376084	4.61854	3.86447e-06	3.90975e-05	chrII	6490809	6491826	-	WBGene00015063	B0228.6	FALSE	FALSE	FALSE	-2.3
WBGene00033835	CBG12985	789.788	1.42673	0.234255	6.09048	1.1257e-09	2.47227e-08	chrII	6422594	6424626	-	WBGene00022887	ZK1290.5	FALSE	FALSE	FALSE	-1.58
WBGene00033841	CBG12992	31.3726	2.17802	0.335867	6.48476	8.88702e-11	2.45599e-09	chrII	6400108	6401971	+	WBGene00022891	ZK1290.10	FALSE	FALSE	FALSE	-2.41
WBGene00033888	CBG13057	19.6679	1.12507	0.352396	3.19262	0.00140988	0.00656158	chrII	6168203	6169202	-	WBGene00017024	D1022.5	FALSE	FALSE	FALSE	-2.48
WBGene00033921	CBG13094	14.1371	2.4453	0.417975	5.85034	4.90577e-09	9.53521e-08	chrII	5869442	5878253	-	NaN	NaN	TRUE	TRUE	FALSE	-1.84
WBGene00034023	CBG13232	165118	7.59931	0.152359	49.8778	0	0	chrIII	6043474	6044370	+	NaN	NaN	FALSE	TRUE	FALSE	-2.13
WBGene00034024	CBG13233	201706	7.57773	0.175512	43.175	0	0	chrIII	6047409	6049568	-	WBGene00009691	F44E5.4	FALSE	TRUE	TRUE	-1.74
WBGene00034025	CBG13234	990708	7.71958	0.131116	58.876	0	0	chrIII	6049856	6051844	+	NaN	NaN	FALSE	TRUE	FALSE	-1.28
WBGene00034042	CBG13256	9.45626	1.37603	0.42434	3.24276	0.00118377	0.00565392	chrIII	6115392	6116906	-	WBGene00013429	Y66D12A.3	FALSE	FALSE	FALSE	-2.29
WBGene00034070	CBG13291	8.38356	1.59862	0.427677	3.73792	0.000185547	0.00115463	chrIII	6257889	6260542	+	WBGene00008812	F14F7.5	FALSE	FALSE	TRUE	-1.69
WBGene00034086	CBG13307	29.2615	3.44852	0.391121	8.81702	1.17551e-18	8.47134e-17	chrIII	6330864	6333572	-	WBGene00018563	F47D12.7	FALSE	TRUE	TRUE	-1.57
WBGene00034110	CBG13331	716.187	2.00641	0.195899	10.2421	1.28458e-24	1.5429e-22	chrIII	6400161	6402035	-	WBGene00013244	Y56A3A.33	FALSE	TRUE	TRUE	-2.13
WBGene00034147	CBG13370	12.0014	1.21437	0.397738	3.0532	0.00226416	0.00979532	chrII	3124685	3126619	+	WBGene00014127	ZK892.3	FALSE	FALSE	TRUE	-1.95
WBGene00034150	CBG13374	17.6868	1.23712	0.374134	3.30662	0.000944283	0.00466144	chrII	3097586	3098825	-	WBGene00007473	chil-8	FALSE	TRUE	FALSE	-2.07
WBGene00034172	CBG13398	5.6352	1.61928	0.423837	3.82052	0.000133172	0.000865501	chrII	3000112	3000904	+	WBGene00014168	ZK945.6	FALSE	FALSE	FALSE	-1.28
WBGene00034195	CBG13427	91.1252	1.00075	0.277481	3.60655	0.000310297	0.00179003	chrII	2864054	2866555	-	NaN	NaN	FALSE	TRUE	FALSE	-1.72
WBGene00034252	CBG13495	121.685	1.67486	0.240825	6.95467	3.53378e-12	1.21938e-10	chrIV	17136879	17138531	+	WBGene00020659	T21G5.1	FALSE	FALSE	TRUE	-2.11
WBGene00034262	CBG13505	24.0015	1.56504	0.370778	4.22096	2.43263e-05	0.000197917	chrIV	17185691	17185912	-	NaN	NaN	FALSE	FALSE	FALSE	-2.22
WBGene00034351	CBG13607	33.4926	1.69686	0.303613	5.58891	2.28502e-08	3.90642e-07	chrI	11564858	11566466	+	WBGene00009465	F36D1.6	FALSE	TRUE	FALSE	-1.61
WBGene00034352	CBG13608	20.7774	2.82844	0.397456	7.11636	1.10813e-12	4.16092e-11	chrI	11566653	11568481	-	WBGene00009412	F35E2.5	FALSE	FALSE	TRUE	-1.42
WBGene00034353	CBG13609	8.24876	2.17208	0.427901	5.07613	3.85191e-07	5.033e-06	chrI	11568575	11570395	-	WBGene00009412	F35E2.5	FALSE	FALSE	TRUE	-1.49
WBGene00034354	CBG13610	9.54691	1.55391	0.425159	3.6549	0.000257285	0.00152676	chrI	11571302	11572845	-	NaN	NaN	FALSE	FALSE	FALSE	-1.58
WBGene00034356	CBG13612	9.15916	1.92761	0.428071	4.50301	6.69982e-06	6.36908e-05	chrI	11576560	11579305	+	WBGene00008870	F15H9.1	FALSE	FALSE	TRUE	-1.69
WBGene00034422	CBG13694	54.2034	1.17456	0.254643	4.61255	3.97761e-06	4.00691e-05	chrIV	891925	894829	-	NaN	NaN	FALSE	FALSE	FALSE	-1.84
WBGene00034528	CBG13833	21.3799	1.78207	0.401317	4.44054	8.97327e-06	8.2337e-05	chrIV	1601161	1604297	-	WBGene00013303	Y57G11C.5	FALSE	FALSE	FALSE	-1.23
WBGene00034583	CBG13902	2053.76	2.12684	0.148491	14.3231	1.57025e-46	3.97592e-44	chrIV	16179582	16184567	-	NaN	NaN	FALSE	TRUE	FALSE	-1.16
WBGene00034585	CBG13904	27.6005	1.61943	0.325086	4.98154	6.30791e-07	7.80655e-06	chrIV	16170893	16174421	+	WBGene00043061	Y54G2A.38	FALSE	TRUE	TRUE	-0.05
WBGene00034664	CBG14006	99.7545	2.71904	0.29451	9.23241	2.64619e-20	2.27439e-18	chrX	7630671	7631935	-	NaN	NaN	FALSE	TRUE	FALSE	-2.4
WBGene00034727	CBG14129	1166.32	1.41697	0.116039	12.2112	2.70935e-34	4.92865e-32	chrX	8136470	8138216	-	WBGene00018702	F52E4.5	FALSE	TRUE	FALSE	-2.16
WBGene00034800	CBG14234	29.4681	2.59811	0.426649	6.08958	1.1321e-09	2.47881e-08	chrX	8685041	8690126	-	WBGene00006927	vit-3	FALSE	FALSE	TRUE	-2.31
WBGene00034855	CBG14311	7.70456	1.30549	0.42585	3.0656	0.00217234	0.00947246	chrX	9057829	9058683	-	WBGene00020670	T22B2.6	FALSE	FALSE	FALSE	-2.25
WBGene00034891	CBG14364	4.50179	1.34334	0.421764	3.18504	0.00144732	0.00670791	chrX	9306312	9307645	+	WBGene00008129	C47A10.12	FALSE	FALSE	FALSE	-1.84
WBGene00034983	CBG14516	13.9809	1.95148	0.427016	4.57005	4.87618e-06	4.81122e-05	chrX	9998690	10007553	+	WBGene00009469	F36D3.1	FALSE	FALSE	FALSE	-2.37
WBGene00035089	CBG14665	361.69	1.08551	0.251078	4.3234	1.5364e-05	0.000132662	chrX	10691670	10694245	-	WBGene00016135	C26B9.6	FALSE	TRUE	FALSE	-2.37
WBGene00035145	CBG14736	39.5076	2.0816	0.333566	6.24042	4.36384e-10	1.03763e-08	chrX	11042421	11044105	-	NaN	NaN	FALSE	FALSE	FALSE	-2.34
WBGene00035259	CBG14879	10.1897	1.85313	0.418142	4.43182	9.34395e-06	8.5113e-05	chrI	3357331	3358522	+	NaN	NaN	FALSE	FALSE	FALSE	-1.78
WBGene00035290	CBG14916	12331.3	2.89156	0.103167	28.028	7.41465e-173	5.78868e-170	chrI	3516623	3526641	+	WBGene00020557	T19B4.3	FALSE	TRUE	FALSE	-2.05
WBGene00035365	CBG15004	35.4448	3.03953	0.41187	7.37981	1.58513e-13	6.82773e-12	chrIV	3766461	3768872	-	WBGene00007792	C28D4.4	FALSE	FALSE	FALSE	-0.64
WBGene00035479	CBG15151	54.4189	1.78732	0.269317	6.63649	3.21234e-11	9.69236e-10	chrIII	611422	614838	-	WBGene00014217	ZK1086.3	FALSE	TRUE	FALSE	-2.44
WBGene00035502	CBG15178	10.2826	1.3969	0.410706	3.40122	0.000670857	0.00348584	chrIII	483369	485673	+	WBGene00010574	K04H4.5	FALSE	TRUE	FALSE	-2.41
WBGene00035552	CBG15238	82.6075	1.00584	0.292583	3.43779	0.000586479	0.00310507	chrIII	219687	222056	+	WBGene00020551	T17H7.7	FALSE	TRUE	FALSE	-2.39
WBGene00035636	CBG15336	78.4359	3.6584	0.363096	10.0756	7.08562e-24	8.19526e-22	chrIII	14435519	14439632	+	NaN	NaN	FALSE	FALSE	FALSE	-2.18
WBGene00035653	CBG15354	22.2676	2.49432	0.373473	6.67872	2.41039e-11	7.44043e-10	chrIII	14520238	14522913	-	WBGene00018951	F56C9.7	FALSE	FALSE	FALSE	-1.85
WBGene00035660	CBG15363	2356.05	2.18103	0.42798	5.09611	3.46712e-07	4.6106e-06	chrI	13597493	13601587	-	NaN	NaN	FALSE	FALSE	FALSE	-1.68
WBGene00035673	CBG15386	1598.24	2.06678	0.109527	18.87	2.01189e-79	8.37705e-77	chrI	13702726	13705587	+	WBGene00012107	T27F6.8	FALSE	TRUE	FALSE	-0.68
WBGene00035680	CBG15401	4297.66	1.3451	0.167091	8.0501	8.27261e-16	4.6829e-14	chrX	16081954	16082342	-	WBGene00018731	F53A9.8	FALSE	FALSE	FALSE	-2.35
WBGene00035681	CBG15402	516.385	1.5054	0.288385	5.2201	1.78827e-07	2.51931e-06	chrX	16080387	16081023	-	NaN	NaN	FALSE	FALSE	FALSE	-2.35
WBGene00035684	CBG15406	2604.08	1.6323	0.117523	13.8891	7.3733e-44	1.74878e-41	chrX	16068624	16069008	-	WBGene00018729	F53A9.6	FALSE	TRUE	FALSE	-2.34
WBGene00035686	CBG15409	585.436	3.57742	0.203692	17.5629	4.7391e-69	1.70763e-66	chrX	16061036	16061712	+	WBGene00018724	F53A9.1	FALSE	FALSE	FALSE	-2.44
WBGene00035690	CBG15413	28.5345	1.2387	0.338805	3.65609	0.000256089	0.00152039	chrX	16053335	16053597	+	WBGene00018724	F53A9.1	FALSE	FALSE	FALSE	-2.37
WBGene00035724	CBG15466	118.735	1.13166	0.289447	3.90972	9.24044e-05	0.000635602	chrX	15788292	15790108	-	WBGene00016187	C28G1.2	FALSE	FALSE	FALSE	-1.81
WBGene00035725	CBG15467	15.0379	1.91995	0.403475	4.75853	1.9501e-06	2.12683e-05	chrX	15777119	15783475	+	NaN	NaN	FALSE	TRUE	FALSE	-1.63
WBGene00035726	CBG15471	513.443	1.34887	0.274353	4.91653	8.80906e-07	1.05265e-05	chrX	15768763	15770103	+	WBGene00015529	C06E2.5	FALSE	TRUE	FALSE	-1.49
WBGene00035739	CBG15501	26.7092	1.22988	0.326773	3.76371	0.000167413	0.00105592	chrX	15671912	15675109	+	NaN	NaN	FALSE	FALSE	FALSE	-2.46
WBGene00035784	CBG15598	37.7482	2.7306	0.324031	8.42698	3.54701e-17	2.33194e-15	chrIV	14771937	14777424	-	NaN	NaN	FALSE	TRUE	FALSE	-1.51
WBGene00035791	CBG15623	11.945	2.39162	0.420552	5.68686	1.29398e-08	2.31348e-07	chrIV	14904874	14907127	-	NaN	NaN	FALSE	TRUE	FALSE	-1.27
WBGene00035792	CBG15624	16.7526	1.82518	0.396913	4.59845	4.25656e-06	4.26498e-05	chrIV	14909132	14913129	-	WBGene00021537	Y42H9AR.2	FALSE	TRUE	TRUE	-1.32
WBGene00035793	CBG15626	83.5705	1.72812	0.237726	7.26937	3.61165e-13	1.45844e-11	chrIV	14917987	14918856	+	WBGene00004816	skr-10	FALSE	TRUE	FALSE	-1.55
WBGene00035810	CBG15648	33.1686	2.72309	0.359194	7.58113	3.42568e-14	1.62499e-12	chrIII	881685	883680	+	WBGene00016523	C39B5.5	FALSE	TRUE	FALSE	-1.57
WBGene00035813	CBG15654	24.611	1.52412	0.42103	3.61999	0.000294619	0.00171225	chrIII	910809	916424	-	WBGene00015243	B0524.4	FALSE	FALSE	TRUE	-2.16
WBGene00035840	CBG15689	20.2289	1.05561	0.34572	3.05337	0.00226283	0.00979185	chrIII	1060516	1063656	-	NaN	NaN	FALSE	TRUE	FALSE	-1.89
WBGene00035893	CBG15748	128.598	1.14447	0.178468	6.41274	1.42926e-10	3.77714e-09	chrIII	1428745	1430646	-	WBGene00012546	Y37D8A.4	FALSE	FALSE	FALSE	-2.29
WBGene00035900	CBG15758	39.906	1.26781	0.304638	4.16169	3.15901e-05	0.000248386	chrIII	1476630	1478210	-	WBGene00012557	Y37D8A.19	FALSE	TRUE	FALSE	-1.18
WBGene00035942	CBG15809	12.695	2.03401	0.424743	4.78881	1.67775e-06	1.85792e-05	chrI	13460219	13463477	+	WBGene00019814	R02C2.1	FALSE	TRUE	TRUE	-0.91
WBGene00036004	CBG15895	68.4431	1.31236	0.357197	3.67404	0.000238743	0.00143193	chrV	16675562	16677278	+	NaN	NaN	FALSE	FALSE	FALSE	-1.73
WBGene00036036	CBG15935	342.318	1.68579	0.190158	8.86523	7.63494e-19	5.58812e-17	chrX	2970830	2972825	-	WBGene00017340	F10D7.3	FALSE	FALSE	FALSE	-1.51
WBGene00036039	CBG15940	424.698	1.0485	0.253562	4.13507	3.5485e-05	0.000274178	chrX	2946462	2948601	+	WBGene00044770	C53C11.5	FALSE	TRUE	FALSE	-2.2
WBGene00036058	CBG15971	22.9902	1.52166	0.416697	3.65172	0.000260487	0.00154119	chrX	2764923	2769215	-	WBGene00018028	F35B3.1	FALSE	FALSE	TRUE	-2.44
WBGene00036094	CBG16012	107.67	2.40027	0.238378	10.0692	7.56057e-24	8.69095e-22	chrX	2547698	2550221	+	WBGene00011642	T09B9.1	FALSE	TRUE	TRUE	-1.31
WBGene00036136	CBG16069	25.7243	2.14557	0.352708	6.08313	1.17855e-09	2.57372e-08	chrX	2369105	2371172	+	NaN	NaN	FALSE	FALSE	FALSE	-2.07
WBGene00036296	CBG16325	8.38908	1.42639	0.415618	3.43198	0.000599184	0.00316073	chrX	1225130	1228577	-	NaN	NaN	FALSE	FALSE	FALSE	-2.08
WBGene00036302	CBG16337	235.097	2.92857	0.326098	8.98067	2.69132e-19	2.08377e-17	chrX	1165154	1165743	+	NaN	NaN	FALSE	FALSE	FALSE	-1.47
WBGene00036309	CBG16345	24.1593	1.2473	0.347654	3.58777	0.000333517	0.00190582	chrX	1126720	1127682	+	WBGene00015546	C06G1.2	FALSE	FALSE	FALSE	-2.04
WBGene00036377	CBG16438	35.9249	1.0518	0.330021	3.18707	0.00143723	0.006669	chrIV	14531902	14536799	-	WBGene00008972	F20C5.7	FALSE	FALSE	FALSE	-2.08
WBGene00036379	CBG16442	91.0949	2.25865	0.406409	5.55759	2.73528e-08	4.62136e-07	chrIV	14555297	14555588	-	NaN	NaN	FALSE	TRUE	FALSE	-1.66
WBGene00036483	CBG16589	10.9053	1.37717	0.427644	3.22036	0.00128031	0.00603793	chrIII	7850782	7852162	+	WBGene00044354	ZK418.11	FALSE	FALSE	FALSE	-2.41
WBGene00036485	CBG16592	27.8926	2.46428	0.42362	5.81719	5.98452e-09	1.13379e-07	chrIII	7859170	7863313	+	NaN	NaN	FALSE	FALSE	FALSE	-2.28
WBGene00036495	CBG16603	45.9649	1.2058	0.316333	3.8118	0.00013796	0.000893392	chrIII	7890935	7892170	-	WBGene00044674	B0280.17	FALSE	TRUE	FALSE	-2.35
WBGene00036503	CBG16612	112.319	1.14173	0.241707	4.7236	2.31707e-06	2.48086e-05	chrIII	7923130	7924237	-	WBGene00018153	F37C12.10	FALSE	FALSE	FALSE	-2.43
WBGene00036593	CBG16728	67.5727	1.51173	0.299673	5.0446	4.54459e-07	5.84033e-06	chrX	13120244	13123195	+	WBGene00017243	F08C6.5	FALSE	FALSE	FALSE	-2.28
WBGene00036656	CBG16823	25.7189	1.69349	0.358795	4.71993	2.35929e-06	2.51763e-05	chrIV	16561055	16561502	-	NaN	NaN	FALSE	FALSE	FALSE	-2.16
WBGene00036657	CBG16824	30.2297	1.72636	0.349449	4.94022	7.80341e-07	9.43915e-06	chrIV	16562851	16563671	+	NaN	NaN	FALSE	FALSE	FALSE	-2.15
WBGene00036683	CBG16862	380.373	1.03021	0.142763	7.2162	5.34617e-13	2.1122e-11	chrX	13717068	13735971	+	NaN	NaN	FALSE	FALSE	FALSE	-1.69
WBGene00036685	CBG16864	353.253	1.72781	0.161854	10.6751	1.33056e-26	1.75569e-24	chrX	13740920	13746065	+	WBGene00018465	F45E1.4	FALSE	FALSE	FALSE	-2.27
WBGene00036690	CBG16873	319.106	1.24906	0.20956	5.96039	2.51632e-09	5.18229e-08	chrX	13778936	13781302	+	WBGene00016406	C34D10.1	FALSE	FALSE	FALSE	-2.26
WBGene00036706	CBG16903	6733.55	1.21885	0.152944	7.96925	1.59636e-15	8.77154e-14	chrX	13892156	13898747	+	WBGene00019490	K07E3.1	FALSE	TRUE	FALSE	-2.29
WBGene00036720	CBG16925	498.928	2.81908	0.304517	9.25752	2.09243e-20	1.83205e-18	chrX	14013377	14015255	+	WBGene00007343	C05E7.1	FALSE	TRUE	FALSE	-2.54
WBGene00036745	CBG16956	40.9821	1.78591	0.327592	5.45163	4.9911e-08	7.98337e-07	chrI	1103734	1107711	+	WBGene00044461	Y18H1A.14	FALSE	TRUE	FALSE	-1.36
WBGene00036810	CBG17039	888.642	1.29668	0.0912731	14.2066	8.34327e-46	2.05695e-43	chrII	15201245	15208611	-	WBGene00000841	cul-6	TRUE	TRUE	FALSE	-1.43
WBGene00036811	CBG17040	71.8717	2.57302	0.282365	9.11239	8.05884e-20	6.68135e-18	chrII	15193003	15199242	-	WBGene00007289	C04B4.1	FALSE	TRUE	FALSE	-1.55
WBGene00036821	CBG17054	67.483	1.09082	0.309419	3.52537	0.000422885	0.00233803	chrII	15117968	15121209	-	NaN	NaN	FALSE	TRUE	FALSE	-1.59
WBGene00036836	CBG17075	87.7168	2.33337	0.400428	5.82718	5.6371e-09	1.08109e-07	chrV	16135310	16136348	-	NaN	NaN	FALSE	TRUE	FALSE	-1.03
WBGene00036840	CBG17083	42.8453	1.40299	0.413757	3.39085	0.00069676	0.00360342	chrV	16169190	16170301	+	NaN	NaN	FALSE	FALSE	FALSE	-1.66
WBGene00036917	CBG17210	211.468	1.84055	0.239591	7.68206	1.56548e-14	7.61879e-13	chrX	6918030	6919282	+	WBGene00011105	R07E3.4	FALSE	FALSE	TRUE	-1.6
WBGene00036927	CBG17228	189.519	1.11635	0.249054	4.48237	7.38176e-06	6.95734e-05	chrX	6821744	6833622	+	WBGene00001122	dyf-6	FALSE	TRUE	FALSE	-2.24
WBGene00036933	CBG17236	122.292	1.03762	0.256017	4.05293	5.05797e-05	0.000373998	chrX	6775477	6779212	+	WBGene00013917	cdk-11.2	FALSE	FALSE	FALSE	-1.77
WBGene00036939	CBG17249	9.00382	1.40179	0.421251	3.32768	0.000875729	0.00437211	chrX	6700976	6710486	-	NaN	NaN	FALSE	FALSE	FALSE	-1.93
WBGene00037069	CBG17457	397.261	2.75505	0.270736	10.1762	2.53343e-24	3.02349e-22	chrIII	3640628	3642708	-	NaN	NaN	FALSE	TRUE	FALSE	-1.75
WBGene00037071	CBG17459	2074.17	1.82846	0.255851	7.14659	8.89605e-13	3.40174e-11	chrIII	3619823	3625266	-	WBGene00018564	F47D12.9	FALSE	TRUE	FALSE	-1.68
WBGene00037149	CBG17553	94.4944	1.05663	0.259225	4.07611	4.57947e-05	0.000342811	chrX	5941269	5943359	+	WBGene00009820	F47B10.9	FALSE	FALSE	FALSE	-1.74
WBGene00037184	CBG17607	17.6092	1.41689	0.427984	3.31061	0.000930925	0.00460109	chrIV	11943427	11944717	-	WBGene00016843	C50F7.3	FALSE	FALSE	FALSE	-1.81
WBGene00037226	CBG17660	36.9596	1.3805	0.379182	3.64074	0.000271857	0.0015943	chrIV	11737967	11750205	+	WBGene00016700	C46A5.4	FALSE	FALSE	TRUE	-2.21
WBGene00037336	CBG17802	15.1998	1.32785	0.426584	3.11274	0.00185359	0.0082974	chrV	17645565	17648953	-	NaN	NaN	FALSE	TRUE	FALSE	-1.18
WBGene00037342	CBG17813	1878.77	1.51692	0.156428	9.69727	3.09678e-22	3.05392e-20	chrV	17699044	17707045	-	WBGene00010006	F53H2.3	FALSE	TRUE	FALSE	-1.55
WBGene00037367	CBG17852	49.8547	1.3731	0.267546	5.13218	2.86398e-07	3.87175e-06	chrV	17833445	17834248	+	WBGene00077692	C08E8.10	FALSE	FALSE	FALSE	-1.59
WBGene00037368	CBG17853	22.6772	2.14018	0.364476	5.87192	4.30773e-09	8.48727e-08	chrV	17835395	17836602	-	WBGene00007439	C08E8.3	TRUE	FALSE	TRUE	-1.55
WBGene00037384	CBG17870	13.0632	1.45472	0.394837	3.68436	0.000229275	0.00138089	chrV	5610932	5611795	+	WBGene00021780	scl-17	FALSE	FALSE	FALSE	-1.08
WBGene00037387	CBG17874	293.295	1.83531	0.196345	9.34736	8.98597e-21	8.05599e-19	chrV	5629525	5637089	+	WBGene00017724	F22F7.7	FALSE	TRUE	FALSE	-1.15
WBGene00037422	CBG17912	86.3418	1.06342	0.288966	3.68007	0.000233169	0.00140164	chrV	5809160	5811056	-	NaN	NaN	FALSE	FALSE	FALSE	-1.58
WBGene00037433	CBG17927	1183.12	2.57555	0.132458	19.4443	3.25927e-84	1.45402e-81	chrV	5837388	5841301	+	NaN	NaN	FALSE	TRUE	FALSE	-1.71
WBGene00037556	CBG18064	11.8034	1.41419	0.421725	3.35335	0.000798405	0.00403662	chrIII	6849044	6852589	-	WBGene00007791	C28A5.6	FALSE	FALSE	FALSE	-2.35
WBGene00037561	CBG18070	40.2487	1.34505	0.288306	4.66536	3.08075e-06	3.20333e-05	chrIII	6838137	6840709	-	WBGene00019812	R01H2.4	FALSE	TRUE	FALSE	-2.33
WBGene00037610	CBG18136	281.215	2.97039	0.218292	13.6074	3.6167e-42	7.87978e-40	chrIII	6569253	6572988	-	WBGene00044588	ZK1236.9	FALSE	TRUE	TRUE	-2.33
WBGene00037630	CBG18159	15.2535	1.16244	0.37766	3.07801	0.00208386	0.00915484	chrIII	6483869	6487275	+	WBGene00010712	K09B11.5	FALSE	FALSE	TRUE	-2.07
WBGene00037638	CBG18172	14.8392	1.39384	0.398193	3.50042	0.000464528	0.00253535	chrIII	6443361	6445533	+	NaN	NaN	FALSE	FALSE	FALSE	-1.79
WBGene00037644	CBG18179	58.3476	2.36616	0.304896	7.76054	8.4567e-15	4.23671e-13	chrIII	6423080	6423765	-	WBGene00008063	C41G7.6	FALSE	FALSE	FALSE	-1.92
WBGene00037692	CBG18239	188262	7.73219	0.10968	70.498	0	0	chrIII	5576899	5577390	+	NaN	NaN	FALSE	TRUE	FALSE	-2.14
WBGene00037693	CBG18240	590940	7.76666	0.127985	60.6842	0	0	chrIII	5573232	5575223	-	WBGene00009691	F44E5.4	FALSE	TRUE	TRUE	-2.19
WBGene00037701	CBG18250	702.17	1.54096	0.289256	5.32731	9.96788e-08	1.4776e-06	chrIII	5528195	5528765	-	WBGene00011733	T12D8.5	FALSE	TRUE	FALSE	-2.11
WBGene00037755	CBG18309	52.3383	1.68643	0.32974	5.11443	3.14688e-07	4.22069e-06	chrIII	5256166	5258346	-	WBGene00022732	ZK418.2	FALSE	FALSE	FALSE	-2.4
WBGene00037822	CBG18386	1471.17	1.30992	0.41209	3.17873	0.00147924	0.0068385	chrIII	4971853	4972839	-	WBGene00008425	D2045.8	FALSE	TRUE	FALSE	-1.46
WBGene00037866	CBG18445	75.3085	1.49554	0.248863	6.0095	1.86099e-09	3.94004e-08	chrII	1782851	1787393	+	WBGene00019641	K10G6.4	TRUE	FALSE	TRUE	-1.42
WBGene00037874	CBG18455	2118.74	1.5306	0.160432	9.54048	1.42166e-21	1.34534e-19	chrII	1902210	1905261	-	WBGene00020007	R11F4.1	TRUE	TRUE	FALSE	-1.46
WBGene00037932	CBG18532	420.204	1.54507	0.325904	4.74087	2.128e-06	2.3061e-05	cb25.fpc4095	64761	66611	-	WBGene00015225	B0507.8	FALSE	FALSE	FALSE	NA
WBGene00037946	CBG18549	18.8757	1.52201	0.363438	4.18781	2.81655e-05	0.000224094	chrI	1177341	1182378	+	WBGene00022385	Y95B8A.4	FALSE	TRUE	FALSE	-0.95
WBGene00037952	CBG18557	29.1741	1.34228	0.345146	3.88902	0.000100649	0.000679345	chrI	1224112	1229135	+	NaN	NaN	TRUE	TRUE	FALSE	0.03
WBGene00038047	CBG18668	18.1048	1.36619	0.4105	3.32811	0.000874385	0.00436656	chrV	17165535	17166866	-	NaN	NaN	FALSE	TRUE	FALSE	-1.76
WBGene00038072	CBG18695	8.21931	1.55294	0.425472	3.64991	0.000262327	0.00154713	chrI	11884132	11887034	-	WBGene00007305	ttbk-5	FALSE	TRUE	FALSE	-1.92
WBGene00038074	CBG18697	7.57166	1.93683	0.427683	4.52867	5.93566e-06	5.70926e-05	chrI	11875628	11877902	-	NaN	NaN	FALSE	TRUE	FALSE	-0.57
WBGene00038120	CBG18758	16.2273	1.27763	0.38773	3.29515	0.000983701	0.00483009	chrIV	2553909	2555690	+	NaN	NaN	FALSE	FALSE	FALSE	-1.75
WBGene00038152	CBG18809	68.9929	2.03775	0.290392	7.01725	2.26278e-12	8.04511e-11	chrI	12683333	12689241	+	NaN	NaN	FALSE	TRUE	FALSE	-1.8
WBGene00038197	CBG18885	19.1067	1.53143	0.419059	3.65444	0.00025774	0.00152816	chrV	11940195	11941456	-	NaN	NaN	FALSE	TRUE	FALSE	-2.21
WBGene00038200	CBG18888	12.714	1.3268	0.412808	3.21409	0.00130858	0.00615125	chrV	11952121	11954171	-	NaN	NaN	FALSE	FALSE	FALSE	-2.53
WBGene00038203	CBG18891	9127.05	2.31689	0.0915293	25.3131	2.29038e-141	1.58944e-138	chrV	11958651	11963905	-	WBGene00021068	W06H8.6	FALSE	TRUE	FALSE	-2.38
WBGene00038204	CBG18893	240.468	1.19948	0.158475	7.56887	3.76497e-14	1.77247e-12	chrV	11971720	11972834	+	WBGene00019522	K08B12.3	FALSE	FALSE	FALSE	-2.3
WBGene00038217	CBG18911	2033.34	2.03405	0.207117	9.82077	9.16385e-23	9.43424e-21	chrV	12052537	12055547	+	WBGene00020891	T28C12.4	FALSE	TRUE	FALSE	-1.89
WBGene00038248	CBG18952	110.358	1.76838	0.256577	6.89221	5.49326e-12	1.86125e-10	chrV	12231348	12232487	-	WBGene00020912	W01A11.7	FALSE	FALSE	TRUE	-1.97
WBGene00038299	CBG19012	81.2433	1.1792	0.21256	5.5476	2.89614e-08	4.86682e-07	chrV	12444943	12447039	-	WBGene00020807	T25F10.4	FALSE	TRUE	FALSE	-2.15
WBGene00038404	CBG19134	42.2761	2.98218	0.396714	7.51721	5.59559e-14	2.56344e-12	chrV	12893879	12895505	+	WBGene00019202	H14N18.2	FALSE	TRUE	TRUE	-2.29
WBGene00038412	CBG19144	352.135	1.26909	0.231387	5.48471	4.14155e-08	6.74785e-07	chrV	12931456	12933910	-	NaN	NaN	FALSE	FALSE	FALSE	-2.11
WBGene00038416	CBG19148	16.3909	1.2199	0.378448	3.22342	0.00126668	0.00598762	chrV	12942069	12943400	+	WBGene00019112	F59E11.6	FALSE	FALSE	FALSE	-2.06
WBGene00038418	CBG19150	14.8546	1.40612	0.383753	3.66413	0.000248176	0.00147965	chrV	12946389	12947624	+	NaN	NaN	FALSE	FALSE	FALSE	-2.06
WBGene00038446	CBG19181	185.451	1.35924	0.258898	5.25008	1.52036e-07	2.17127e-06	chrV	13045251	13046342	-	WBGene00020865	T27E4.7	FALSE	FALSE	FALSE	-1.93
WBGene00038447	CBG19184	92106.8	7.30341	0.168542	43.3329	0	0	chrV	13058070	13058794	-	NaN	NaN	FALSE	TRUE	FALSE	-2.01
WBGene00038448	CBG19185	132364	7.47642	0.142102	52.6131	0	0	chrV	13058875	13059550	+	WBGene00002018	hsp-16.41	FALSE	TRUE	TRUE	-2.04
WBGene00038449	CBG19186	108929	7.53514	0.143037	52.6797	0	0	chrV	13061689	13062298	-	WBGene00002015	hsp-16.1	FALSE	TRUE	TRUE	-1.71
WBGene00038450	CBG19187	98009.9	7.38867	0.197555	37.4006	3.81634e-306	4.76712e-303	chrV	13062495	13063166	+	NaN	NaN	FALSE	TRUE	FALSE	-1.93
WBGene00038452	CBG19189	930.016	1.8033	0.228053	7.90738	2.62854e-15	1.39918e-13	chrV	13068170	13069159	+	WBGene00017659	F21C10.10	FALSE	TRUE	TRUE	-1.72
WBGene00038483	CBG19225	10.873	1.47904	0.427659	3.45846	0.000543266	0.00290501	chrV	13204219	13205860	+	WBGene00015361	C02H6.1	FALSE	FALSE	FALSE	-1.85
WBGene00038537	CBG19291	16.914	2.65542	0.399309	6.65003	2.93027e-11	8.88421e-10	chrV	13515854	13517572	+	NaN	NaN	FALSE	TRUE	FALSE	-2.33
WBGene00038544	CBG19298	9.87573	1.35316	0.425736	3.1784	0.00148091	0.00684454	chrV	13537550	13539075	+	WBGene00008231	tag-329	FALSE	FALSE	TRUE	-2.02
WBGene00038556	CBG19311	1194.24	1.59366	0.14475	11.0097	3.43009e-28	4.86891e-26	chrV	13575914	13577858	-	WBGene00009102	F25B3.5	FALSE	TRUE	FALSE	-2.34
WBGene00038589	CBG19350	1276.35	1.07709	0.185372	5.81041	6.23207e-09	1.17475e-07	chrV	13737958	13739624	-	WBGene00006470	tag-120	FALSE	TRUE	FALSE	-1.83
WBGene00038672	CBG19456	6.41714	1.43781	0.427881	3.36029	0.000778607	0.00395252	chrI	781868	785453	+	NaN	NaN	FALSE	FALSE	FALSE	-1.6
WBGene00038775	CBG19583	20.2374	2.25811	0.387747	5.82367	5.75695e-09	1.09622e-07	chrII	12690431	12691309	+	WBGene00022441	Y110A2AL.4	FALSE	FALSE	FALSE	-1.3
WBGene00038792	CBG19606	31.5963	2.67619	0.414318	6.45927	1.05208e-10	2.85693e-09	chrII	12593977	12598332	-	WBGene00018994	F56H1.3	FALSE	TRUE	FALSE	-1.27
WBGene00038794	CBG19609	22.8446	1.31723	0.389311	3.38348	0.000715737	0.00368833	chrII	12588178	12590723	+	WBGene00019036	irld-36	FALSE	TRUE	FALSE	-1.05
WBGene00038796	CBG19612	858.773	4.2293	0.287078	14.7323	4.00098e-49	1.05586e-46	chrII	12582243	12583927	+	WBGene00017366	F10G2.7	FALSE	TRUE	FALSE	-1.32
WBGene00038797	CBG19613	608.364	2.4728	0.173974	14.2137	7.53882e-46	1.8834e-43	chrII	12579547	12581556	+	WBGene00019513	K08A2.4	FALSE	FALSE	FALSE	-1.42
WBGene00038798	CBG19614	184.244	5.55244	0.306415	18.1206	2.1907e-73	8.73342e-71	chrII	12575276	12578227	+	WBGene00017366	F10G2.7	FALSE	TRUE	FALSE	-1.38
WBGene00038897	CBG19727	45.1816	2.83562	0.337329	8.40611	4.23849e-17	2.74798e-15	chrI	14730401	14734527	-	WBGene00009492	F36H1.3	FALSE	TRUE	TRUE	-0.25
WBGene00038901	CBG19731	48.5489	1.67236	0.301366	5.54925	2.86898e-08	4.8255e-07	chrI	14756145	14758912	+	WBGene00019459	K06H7.8	FALSE	FALSE	FALSE	-0.93
WBGene00038939	CBG19773	33.3653	1.71089	0.317147	5.39462	6.86692e-08	1.06511e-06	chrI	15003464	15004754	+	WBGene00011132	R08A2.1	FALSE	TRUE	FALSE	-2.23
WBGene00039014	CBG19873	294.036	1.10125	0.155778	7.06934	1.55672e-12	5.7305e-11	chrIV	6245298	6247390	+	WBGene00016667	C45E5.4	FALSE	TRUE	FALSE	-1.52
WBGene00039029	CBG19892	13.1334	1.43647	0.395801	3.62928	0.000284216	0.00165692	chrIV	6157799	6159420	-	WBGene00005085	srd-7	FALSE	TRUE	FALSE	-2.05
WBGene00039082	CBG19966	438.326	1.48411	0.182334	8.13953	3.96811e-16	2.32984e-14	chrIV	5792917	5798893	+	WBGene00021157	Y4C6B.3	FALSE	TRUE	FALSE	-2.01
WBGene00039121	CBG20017	435.736	1.28358	0.122581	10.4712	1.17094e-25	1.47248e-23	chrIV	5520806	5523571	-	WBGene00007890	C33A12.19	FALSE	TRUE	FALSE	-1.79
WBGene00039211	CBG20156	27.1504	1.96592	0.335543	5.85893	4.65859e-09	9.11149e-08	chrIII	11646907	11648462	-	WBGene00007632	C16C10.13	FALSE	TRUE	TRUE	-1.43
WBGene00039215	CBG20160	92.2373	1.10703	0.322273	3.43506	0.000592424	0.00313036	chrIII	11631252	11633348	+	WBGene00011278	R74.2	FALSE	TRUE	FALSE	-1.65
WBGene00039222	CBG20167	59.0915	2.20023	0.278424	7.90245	2.73464e-15	1.45153e-13	chrIII	11600450	11602924	-	WBGene00013270	Y57A10A.31	FALSE	TRUE	FALSE	-1.85
WBGene00039284	CBG20250	24.6929	2.78111	0.397943	6.98871	2.77422e-12	9.73417e-11	chrI	11038432	11041429	-	NaN	NaN	FALSE	FALSE	FALSE	-2.34
WBGene00039374	CBG20385	58.4027	1.10927	0.275033	4.03324	5.50141e-05	0.000401558	chrI	12261607	12262292	+	NaN	NaN	FALSE	FALSE	FALSE	-1.42
WBGene00039382	CBG20395	252.276	1.27121	0.237932	5.34274	9.15541e-08	1.3658e-06	chrI	12331558	12334235	-	WBGene00007216	C01A2.4	FALSE	FALSE	FALSE	-1.69
WBGene00039396	CBG20412	13.5599	1.55043	0.400089	3.87521	0.000106533	0.000712385	chrI	12410646	12412595	+	WBGene00006052	ssq-3	FALSE	TRUE	FALSE	-1.79
WBGene00039399	CBG20415	19.8525	1.94475	0.372697	5.21805	1.80819e-07	2.54545e-06	chrI	12425406	12428417	+	WBGene00044250	F56G4.7	FALSE	FALSE	FALSE	-1.79
WBGene00039407	CBG20423	12.3033	1.4096	0.416901	3.38115	0.00072184	0.00371569	chrI	12478653	12479978	+	WBGene00014049	ZK666.11	FALSE	TRUE	FALSE	-1.91
WBGene00039408	CBG20424	7.61255	1.4469	0.422614	3.42369	0.000617771	0.0032478	chrI	12480279	12481985	-	WBGene00022064	Y67D8B.5	FALSE	TRUE	FALSE	-1.87
WBGene00039449	CBG20474	41.8836	1.33387	0.292884	4.55425	5.25719e-06	5.15174e-05	chrI	6751891	6754301	+	WBGene00009054	F22D6.9	FALSE	FALSE	FALSE	-2.29
WBGene00039454	CBG20480	3857.15	1.43521	0.209095	6.8639	6.70037e-12	2.24588e-10	chrI	6730858	6734191	-	WBGene00009050	F22D6.2	FALSE	TRUE	FALSE	-2.4
WBGene00039484	CBG20514	48.0659	2.52521	0.34374	7.34627	2.03819e-13	8.54353e-12	chrV	17886939	17890380	-	NaN	NaN	TRUE	TRUE	FALSE	-1.36
WBGene00039565	CBG20616	251.056	1.21387	0.160985	7.54028	4.68968e-14	2.1643e-12	chrII	10870447	10871471	-	WBGene00017838	F26G1.2	FALSE	TRUE	TRUE	-1.56
WBGene00039573	CBG20625	2271.95	1.95746	0.180959	10.8171	2.85587e-27	3.90587e-25	chrII	10891140	10893016	-	WBGene00018268	F41C3.2	FALSE	TRUE	TRUE	-1.86
WBGene00039655	CBG20724	8.97663	1.49507	0.421158	3.5499	0.000385375	0.00215803	chrV	18600707	18604418	-	NaN	NaN	FALSE	TRUE	FALSE	-1.74
WBGene00039698	CBG20775	33.4604	1.55091	0.406487	3.8154	0.00013596	0.000881481	chrII	11337254	11340778	-	WBGene00008448	E01G4.6	FALSE	FALSE	TRUE	-0.91
WBGene00039768	CBG20856	9.16353	1.72986	0.42246	4.09474	4.2265e-05	0.00031958	chrII	11648106	11649681	+	WBGene00012219	W03C9.1	FALSE	FALSE	TRUE	-2.13
WBGene00039785	CBG20874	13.8001	1.78792	0.399159	4.47921	7.49193e-06	7.047e-05	chrII	11743314	11744514	+	WBGene00021113	gsp-3	FALSE	FALSE	FALSE	-1.84
WBGene00039793	CBG20883	21.3163	1.2259	0.394745	3.10554	0.0018993	0.00846506	chrII	11787274	11791035	-	WBGene00010987	R03C1.1	FALSE	FALSE	FALSE	-2.29
WBGene00039809	CBG20905	27.5465	1.18897	0.332598	3.57479	0.000350513	0.00198536	chrII	11883079	11887483	+	WBGene00013166	Y53F4B.20	FALSE	FALSE	FALSE	-1.55
WBGene00039841	CBG20941	11.0918	2.06237	0.426029	4.84091	1.29245e-06	1.47572e-05	chrII	12074308	12077700	+	NaN	NaN	FALSE	FALSE	FALSE	-0.1
WBGene00039883	CBG20992	31.1443	1.33366	0.342353	3.89558	9.79651e-05	0.000665996	chrII	12256781	12257616	-	NaN	NaN	FALSE	FALSE	FALSE	-2
WBGene00039896	CBG21010	4711.56	2.2333	0.254311	8.78174	1.60961e-18	1.15112e-16	chrII	12322026	12324128	+	WBGene00012468	Y17G7B.17	FALSE	TRUE	FALSE	-1.92
WBGene00039898	CBG21012	29.1474	2.81789	0.371987	7.57525	3.58436e-14	1.69596e-12	chrII	12334490	12335295	-	WBGene00012841	Y43F11A.1	FALSE	TRUE	FALSE	-1.66
WBGene00039899	CBG21014	56.3339	4.40385	0.397199	11.0873	1.44665e-28	2.08507e-26	chrII	12336738	12337624	+	WBGene00012841	Y43F11A.1	FALSE	TRUE	FALSE	-1.68
WBGene00039904	CBG21019	3414.95	1.52533	0.116627	13.0787	4.35749e-39	8.8746e-37	chrII	12354346	12358497	+	WBGene00012463	Y17G7B.10	FALSE	FALSE	FALSE	-1.77
WBGene00039916	CBG21032	16.0905	2.52164	0.411895	6.12204	9.23864e-10	2.07063e-08	chrII	12409280	12411860	-	NaN	NaN	FALSE	FALSE	FALSE	-1.6
WBGene00039928	CBG21047	144.07	1.1644	0.274893	4.23583	2.27711e-05	0.000186805	chrIV	15335957	15338667	+	WBGene00015251	B0546.4	FALSE	TRUE	FALSE	-1.6
WBGene00040024	CBG21179	174.583	1.59061	0.158245	10.0516	9.03768e-24	1.0263e-21	chrIII	13155295	13157003	+	NaN	NaN	FALSE	TRUE	FALSE	-2.09
WBGene00040087	CBG21259	5121.2	1.25383	0.126362	9.92254	3.32186e-23	3.55667e-21	chrIV	13537822	13540392	+	WBGene00019664	K11H12.8	FALSE	TRUE	FALSE	-2.11
WBGene00040091	CBG21263	369.685	1.09552	0.130034	8.42487	3.61143e-17	2.36599e-15	chrIV	13548910	13552840	+	NaN	NaN	FALSE	FALSE	FALSE	-1.97
WBGene00040121	CBG21311	44.7999	1.26609	0.273648	4.6267	3.71537e-06	3.78342e-05	chrIV	13369775	13372011	-	NaN	NaN	FALSE	FALSE	FALSE	-1.92
WBGene00040237	CBG21480	7.93638	2.1917	0.427934	5.12158	3.02983e-07	4.07245e-06	chrII	14974686	14976959	+	WBGene00005915	srx-24	FALSE	FALSE	FALSE	-1.89
WBGene00040258	CBG21510	182.322	1.20041	0.178289	6.73295	1.66252e-11	5.24422e-10	chrIV	1811641	1814072	-	WBGene00013310	Y57G11C.14	FALSE	FALSE	FALSE	-2.1
WBGene00040380	CBG21674	16.3463	1.46287	0.408753	3.57886	0.000345093	0.0019588	chrIV	5061359	5066345	-	NaN	NaN	FALSE	FALSE	FALSE	-1.02
WBGene00040421	CBG21719	28.1818	1.61447	0.39105	4.12857	3.65033e-05	0.000281119	chrIV	4750043	4751648	+	WBGene00007765	C27B7.9	FALSE	TRUE	FALSE	-2.2
WBGene00040466	CBG21773	27.0368	1.31313	0.341376	3.84657	0.000119785	0.000790008	chrIV	4395046	4398181	-	WBGene00007222	C01F6.2	FALSE	TRUE	FALSE	-1.26
WBGene00040498	CBG21815	11.9639	1.44125	0.420396	3.42833	0.000607316	0.00319823	chrV	2555787	2559881	+	WBGene00020392	knl-3	TRUE	TRUE	FALSE	-1.87
WBGene00040590	CBG21921	39.5095	2.39473	0.331865	7.21598	5.35462e-13	2.1122e-11	chrI	6914674	6915372	-	NaN	NaN	FALSE	TRUE	FALSE	-2.35
WBGene00040727	CBG22098	78.1512	1.21669	0.219959	5.53144	3.17605e-08	5.29445e-07	chrI	2324598	2325792	-	NaN	NaN	FALSE	TRUE	FALSE	-1.52
WBGene00040743	CBG22119	877.2	1.70352	0.397908	4.28118	1.85905e-05	0.000156553	chrI	2443781	2446524	-	WBGene00007506	C10C5.2	FALSE	FALSE	TRUE	-2.06
WBGene00040767	CBG22144	12.5597	1.38826	0.39796	3.48843	0.000485871	0.00263801	chrI	2549419	2551944	-	WBGene00013829	Y116F11B.14	FALSE	FALSE	FALSE	-1.7
WBGene00040806	CBG22191	3787.42	2.40061	0.203233	11.8121	3.37877e-32	5.60248e-30	chrI	2747821	2762383	-	WBGene00008876	F16A11.1	FALSE	FALSE	FALSE	-1.69
WBGene00040817	CBG22207	14.1639	1.7942	0.427558	4.19638	2.7121e-05	0.000217444	chrI	2811416	2812929	+	NaN	NaN	FALSE	FALSE	FALSE	-2.02
WBGene00040829	CBG22222	10.9946	1.29446	0.414795	3.12071	0.00180413	0.0081123	chrI	2874191	2877450	+	WBGene00022140	Y71G12A.4	FALSE	FALSE	TRUE	-2.17
WBGene00040833	CBG22229	150.33	1.97534	0.367341	5.3774	7.55686e-08	1.15965e-06	chrI	2899224	2901912	-	WBGene00022156	Y71G12B.18	FALSE	TRUE	FALSE	-2.04
WBGene00040834	CBG22230	74.194	3.64078	0.409227	8.89671	5.75251e-19	4.2435e-17	chrI	2902780	2904203	+	NaN	NaN	FALSE	TRUE	FALSE	-1.85
WBGene00040872	CBG22271	32.4694	1.73419	0.329066	5.27003	1.36401e-07	1.96282e-06	chrI	3070305	3071456	+	WBGene00045048	D1007.19	FALSE	TRUE	FALSE	-1.72
WBGene00040967	CBG22403	10.4885	1.51056	0.410215	3.68236	0.000231087	0.00139135	chrIV	3132643	3140643	+	NaN	NaN	FALSE	TRUE	FALSE	-1.38
WBGene00041030	CBG22480	86.8483	1.85348	0.40394	4.5885	4.46447e-06	4.45188e-05	chrIII	2847317	2848802	+	NaN	NaN	FALSE	TRUE	FALSE	-2.03
WBGene00041094	CBG22562	37.2058	1.30769	0.36239	3.60852	0.000307951	0.00177833	cb25.fpc4366	7205	10505	+	NaN	NaN	FALSE	FALSE	FALSE	NA
WBGene00041095	CBG22563	284.21	2.43764	0.249327	9.77685	1.41546e-22	1.44138e-20	cb25.fpc4366	12265	12571	-	WBGene00050899	T10C6.15	FALSE	FALSE	FALSE	NA
WBGene00041096	CBG22564	1066.46	1.68451	0.169139	9.95934	2.29592e-23	2.50109e-21	cb25.fpc4366	13495	17431	+	NaN	NaN	FALSE	FALSE	FALSE	NA
WBGene00041147	CBG22624	45.9937	1.6643	0.369302	4.5066	6.58743e-06	6.27497e-05	chrV	15989859	15992103	-	NaN	NaN	FALSE	TRUE	FALSE	-1.34
WBGene00041215	CBG22716	2101.84	1.35386	0.24436	5.54043	3.01724e-08	5.04318e-07	chrX	16667461	16672566	+	WBGene00019294	K02A6.3	FALSE	FALSE	FALSE	-1.83
WBGene00041219	CBG22724	98.6165	2.292	0.348699	6.573	4.93112e-11	1.44819e-09	chrX	16627347	16631609	+	WBGene00019782	M60.7	FALSE	FALSE	TRUE	-1.87
WBGene00041250	CBG22762	32.5908	1.20194	0.342627	3.50802	0.000451453	0.00247625	chrX	16455861	16456348	-	WBGene00017258	F08F1.4	FALSE	FALSE	FALSE	-1.92
WBGene00041297	CBG22832	7.4548	1.56215	0.428062	3.64936	0.000262896	0.00154951	chrV	17016682	17017871	-	WBGene00023506	srz-11	FALSE	TRUE	FALSE	-1.56
WBGene00041304	CBG22841	20.9174	1.21403	0.39255	3.09267	0.00198362	0.00877618	chrV	16974171	16976129	-	WBGene00009423	F35E8.10	FALSE	TRUE	FALSE	-0.91
WBGene00041343	CBG22882	259.117	1.07628	0.171706	6.26812	3.65423e-10	8.84616e-09	chrV	16866776	16870023	+	NaN	NaN	FALSE	TRUE	FALSE	-1.23
WBGene00041382	CBG22935	3253.78	2.68062	0.343055	7.81397	5.54129e-15	2.82139e-13	chrIII	14108386	14110368	+	WBGene00017698	F22B7.9	FALSE	TRUE	FALSE	-1.61
WBGene00041408	CBG22968	26.8944	2.94889	0.404473	7.2907	3.0834e-13	1.25868e-11	chrIII	13922417	13924958	-	NaN	NaN	FALSE	FALSE	FALSE	-2.21
WBGene00041438	CBG23002	35.0335	1.66355	0.29966	5.55146	2.83289e-08	4.77767e-07	chrIII	13728209	13730879	-	WBGene00017481	F15B10.3	FALSE	FALSE	FALSE	-1.67
WBGene00041478	CBG23052	881.964	1.08161	0.169609	6.37706	1.8052e-10	4.70433e-09	chrV	10117844	10119457	-	WBGene00010238	F58B4.5	TRUE	TRUE	FALSE	-1.84
WBGene00041481	CBG23055	2165.98	3.05169	0.130656	23.3566	1.18039e-120	6.91153e-118	chrV	10106291	10109337	+	WBGene00008922	F17C11.11	FALSE	FALSE	TRUE	-2.36
WBGene00041487	CBG23061	47.6288	1.94923	0.279464	6.97488	3.06134e-12	1.06816e-10	chrV	10090562	10091329	-	WBGene00023503	F17C11.13	FALSE	FALSE	TRUE	-2.38
WBGene00041497	CBG23073	270.825	1.94183	0.34099	5.69467	1.23609e-08	2.2227e-07	chrV	10038556	10039507	+	WBGene00007553	C13G3.1	FALSE	TRUE	TRUE	-2.4
WBGene00041634	CBG23246	1160.08	1.44954	0.223982	6.47168	9.6919e-11	2.65105e-09	chrV	9450335	9452736	+	WBGene00011263	R13H4.5	FALSE	FALSE	FALSE	-2.28
WBGene00041730	CBG23363	928.85	2.01736	0.2828	7.13353	9.783e-13	3.70311e-11	chrV	8961305	8962443	+	NaN	NaN	FALSE	TRUE	FALSE	-2.26
WBGene00041731	CBG23364	33.2456	1.36764	0.345895	3.95391	7.68837e-05	0.000539741	chrV	8954227	8956283	-	WBGene00008647	F10C2.7	FALSE	FALSE	FALSE	-2.34
WBGene00041839	CBG23489	25.5536	1.83352	0.376993	4.86355	1.15301e-06	1.3336e-05	chrV	8547116	8548012	+	WBGene00022337	pals-16	FALSE	FALSE	TRUE	-1.73
WBGene00041840	CBG23490	83.3442	2.42267	0.312091	7.76268	8.31529e-15	4.17704e-13	chrV	8543797	8546963	+	WBGene00138721	pals-37	FALSE	FALSE	TRUE	-1.89
WBGene00041841	CBG23491	50.6348	2.04601	0.363272	5.63218	1.77948e-08	3.10295e-07	chrV	8538603	8543641	+	WBGene00012091	pals-29	FALSE	FALSE	FALSE	-2.29
WBGene00041842	CBG23492	30.2181	2.93952	0.393025	7.47922	7.47651e-14	3.35941e-12	chrV	8536384	8538062	+	WBGene00012091	pals-29	FALSE	FALSE	FALSE	-2.29
WBGene00041844	CBG23494	39.4224	1.38457	0.407753	3.39562	0.000684725	0.00355185	chrV	8530339	8533448	+	NaN	NaN	FALSE	TRUE	FALSE	-2.21
WBGene00041865	CBG23525	12558.8	2.16212	0.22182	9.74717	1.89687e-22	1.92117e-20	chrV	8415224	8416449	+	WBGene00009724	F45D3.4	FALSE	TRUE	FALSE	-1.78
WBGene00042009	CBG23737	27.9836	1.5906	0.358551	4.43618	9.15695e-06	8.38203e-05	chrI	5875323	5876746	-	WBGene00011231	R11A5.3	FALSE	FALSE	TRUE	-2.27
WBGene00042043	CBG23781	1314.38	1.90486	0.170439	11.1762	5.33438e-29	7.80861e-27	cb25.NA_040	1658	2680	+	WBGene00008269	C53A5.11	FALSE	FALSE	TRUE	NA
WBGene00042073	CBG23814	161.993	1.26217	0.30092	4.19439	2.73613e-05	0.000218995	chrV	18059057	18064330	+	WBGene00012699	Y39B6A.41	FALSE	TRUE	FALSE	-1.56
WBGene00042100	CBG23846	57.8008	1.03874	0.308099	3.37144	0.000747771	0.00382292	chrI	11978764	11982191	+	WBGene00005525	sri-13	FALSE	TRUE	FALSE	-1.81
WBGene00042133	CBG23892	7.80433	1.65799	0.426943	3.8834	0.000103006	0.000692756	chrV	16299829	16303140	-	NaN	NaN	FALSE	TRUE	FALSE	-1.39
WBGene00042177	CBG23947	44.184	1.6828	0.349821	4.81045	1.50588e-06	1.69769e-05	cb25.NA_067	11149	16282	+	WBGene00022032	Y65B4A.9	FALSE	FALSE	TRUE	NA
WBGene00042197	CBG23978	28.841	2.5178	0.407896	6.17265	6.71533e-10	1.54009e-08	chrV	16425508	16434490	-	WBGene00015583	C08A9.3	FALSE	TRUE	FALSE	-1.29
WBGene00042267	CBG24068	14.066	2.67724	0.420373	6.36873	1.90597e-10	4.91904e-09	cb25.NA_089	1938	2219	+	NaN	NaN	FALSE	FALSE	FALSE	NA
WBGene00042363	CBG24195	346.683	2.42955	0.300746	8.07841	6.5615e-16	3.74826e-14	cb25.NA_108	34440	35209	-	WBGene00020760	T24C4.4	FALSE	FALSE	TRUE	NA
WBGene00042396	CBG24236	24.9961	2.08097	0.39806	5.22779	1.71546e-07	2.42403e-06	chrIV	15107352	15111114	-	WBGene00007494	C09G9.3	FALSE	TRUE	FALSE	-1.38
WBGene00042446	CBG24302	168.817	1.20408	0.319954	3.76329	0.000167695	0.00105724	cb25.NA_135	11833	15146	+	NaN	NaN	FALSE	FALSE	FALSE	NA
WBGene00042518	CBG24395	390.945	1.46412	0.209288	6.99574	2.63859e-12	9.32817e-11	cb25.NA_151	1633	2423	+	NaN	NaN	FALSE	FALSE	FALSE	NA
WBGene00042652	CBG24574	31.4759	1.51014	0.333012	4.53479	5.76616e-06	5.57012e-05	chrV	2248813	2249700	-	WBGene00022018	Y61A9LA.7	FALSE	TRUE	FALSE	-1.89
WBGene00042697	CBG24628	13.3185	1.54186	0.412663	3.73637	0.000186696	0.00116062	chrV	18224852	18230523	+	WBGene00010299	F59A1.13	FALSE	TRUE	FALSE	-1.6
WBGene00042702	CBG24634	102.166	1.06723	0.19697	5.41821	6.01977e-08	9.42292e-07	chrV	18258259	18260935	-	NaN	NaN	FALSE	TRUE	FALSE	-1.37
WBGene00042849	CBG24818	2042.24	6.01718	0.196637	30.6005	1.20467e-205	1.18799e-202	cb25.NA_230	2828	3058	-	WBGene00012587	Y38E10A.9	FALSE	FALSE	FALSE	NA
WBGene00042850	CBG24819	44.2899	4.18392	0.365121	11.459	2.11976e-30	3.33764e-28	cb25.NA_230	7010	7240	+	WBGene00012587	Y38E10A.9	FALSE	FALSE	FALSE	NA
WBGene00043005	CBG25037	278.956	1.0032	0.146231	6.86037	6.86818e-12	2.2902e-10	cb25.NA_363	1294	2177	-	NaN	NaN	FALSE	FALSE	FALSE	NA
WBGene00086570	CBG25156	402.184	2.00219	0.193111	10.3681	3.46466e-25	4.24296e-23	cb25.NA_213	16126	19921	+	NaN	NaN	FALSE	FALSE	FALSE	NA
WBGene00086795	CBG25381	12.3815	1.5169	0.408756	3.71102	0.000206424	0.00126522	chrI	10686309	10687477	-	NaN	NaN	FALSE	FALSE	FALSE	-1.71
WBGene00086811	CBG25397	205.938	1.61092	0.255686	6.30038	2.9691e-10	7.33931e-09	chrI	11515406	11515949	-	NaN	NaN	FALSE	TRUE	FALSE	-1.2
WBGene00086835	CBG25421	36.6539	2.07445	0.308268	6.72937	1.704e-11	5.36602e-10	chrI	13504072	13506206	-	NaN	NaN	FALSE	FALSE	FALSE	-1.84
WBGene00086836	CBG25422	41.8927	2.08249	0.309101	6.73726	1.61401e-11	5.09977e-10	chrI	13521996	13522316	+	NaN	NaN	FALSE	TRUE	FALSE	-1.48
WBGene00086840	CBG25426	6.19647	1.45939	0.428059	3.40931	0.000651275	0.00339347	chrI	15412938	15414625	+	NaN	NaN	FALSE	FALSE	FALSE	-2.29
WBGene00086858	CBG25444	153.467	1.60946	0.251039	6.41119	1.44389e-10	3.81044e-09	chrII	89304	90710	+	WBGene00044158	Y53C12A.8	FALSE	FALSE	FALSE	-1.55
WBGene00086884	CBG25470	17.4337	1.67663	0.39022	4.29662	1.73423e-05	0.0001473	chrII	2311730	2314486	-	NaN	NaN	FALSE	FALSE	FALSE	-0.95
WBGene00086888	CBG25474	4.71416	1.27388	0.400511	3.18063	0.00146953	0.00679865	chrII	2472030	2473237	-	NaN	NaN	FALSE	TRUE	FALSE	-1.77
WBGene00086909	CBG25495	14.3018	1.49426	0.421276	3.54698	0.000389667	0.00217946	chrII	3473605	3474471	-	NaN	NaN	FALSE	FALSE	FALSE	-1.85
WBGene00086912	CBG25498	11.5963	1.28633	0.414993	3.09965	0.00193752	0.00860675	chrII	3692418	3697026	+	NaN	NaN	TRUE	FALSE	FALSE	-1.89
WBGene00086915	CBG25501	6.50473	1.53776	0.428075	3.59227	0.000327809	0.00187776	chrII	3724748	3725476	-	NaN	NaN	FALSE	FALSE	FALSE	-1.68
WBGene00086980	CBG25566	6.22746	1.62568	0.426957	3.80759	0.000140328	0.000906178	chrII	7490110	7491326	+	NaN	NaN	FALSE	FALSE	FALSE	-1.83
WBGene00087008	CBG25594	84.3508	1.26894	0.287942	4.40693	1.04844e-05	9.44683e-05	chrII	8517760	8518853	-	NaN	NaN	FALSE	FALSE	FALSE	-2.15
WBGene00087045	CBG25631	10.0023	1.49921	0.423016	3.54409	0.000393975	0.00219896	chrII	9768427	9769579	-	NaN	NaN	FALSE	FALSE	FALSE	-2.26
WBGene00087082	CBG25668	12.6251	1.44732	0.409855	3.5313	0.000413519	0.0022937	chrV	18579347	18581239	+	NaN	NaN	FALSE	FALSE	FALSE	-1.72
WBGene00087109	CBG25695	14.4175	1.43541	0.41949	3.4218	0.000622083	0.00326681	chrII	13258920	13259964	+	NaN	NaN	FALSE	TRUE	FALSE	-1.73
WBGene00087229	CBG25815	21.7749	2.50476	0.381753	6.56122	5.3369e-11	1.56002e-09	chrIII	1684439	1689612	+	WBGene00007381	C06C6.7	FALSE	FALSE	FALSE	-1.23
WBGene00087237	CBG25823	67.6909	1.64487	0.395867	4.15511	3.25137e-05	0.000254261	chrIII	2596345	2598907	+	NaN	NaN	FALSE	FALSE	FALSE	-2.06
WBGene00087241	CBG25827	22.945	1.33477	0.366954	3.63743	0.000275374	0.00161089	chrIII	2849426	2853199	-	NaN	NaN	FALSE	FALSE	FALSE	-1.77
WBGene00087349	CBG25935	231.742	3.80729	0.227956	16.7019	1.26958e-62	3.89969e-60	chrIII	7931323	7932916	+	NaN	NaN	FALSE	FALSE	FALSE	-2.44
WBGene00087390	CBG25976	19.0673	2.87334	0.422311	6.80386	1.01856e-11	3.32487e-10	chrIII	6668837	6671510	-	NaN	NaN	FALSE	FALSE	FALSE	-2.35
WBGene00087398	CBG25984	4.50705	1.33732	0.404889	3.30293	0.000956795	0.00470908	chrIII	6459260	6459782	+	NaN	NaN	FALSE	FALSE	FALSE	-1.71
WBGene00087416	CBG26002	9.4409	1.30863	0.416383	3.14286	0.00167308	0.00760331	chrIII	5081238	5082352	-	WBGene00011900	T21C12.4	FALSE	FALSE	FALSE	-2.39
WBGene00087441	CBG26027	32.7925	1.84688	0.342618	5.39048	7.02683e-08	1.08706e-06	chrIII	11589706	11592922	+	NaN	NaN	FALSE	TRUE	FALSE	-1.96
WBGene00087495	CBG26081	12.8204	1.33445	0.408941	3.26318	0.00110171	0.00532227	chrIII	256739	258035	-	NaN	NaN	FALSE	FALSE	FALSE	-2.35
WBGene00087498	CBG26084	39.2959	1.91761	0.376993	5.08659	3.64562e-07	4.80703e-06	chrIII	391902	393352	+	NaN	NaN	FALSE	FALSE	FALSE	-2.01
WBGene00087503	CBG26089	14.0994	1.55046	0.412626	3.75754	0.000171595	0.00107856	chrIII	556805	559661	+	WBGene00269373	M01D1.12	FALSE	FALSE	FALSE	-2.26
WBGene00087510	CBG26096	19.8647	1.2627	0.374104	3.37525	0.000737479	0.00377751	chrIII	13366555	13367970	+	NaN	NaN	TRUE	FALSE	FALSE	-2.1
WBGene00087548	CBG26134	348.271	1.55519	0.22506	6.91012	4.84231e-12	1.65566e-10	chrIII	11297022	11300483	-	WBGene00011215	R10E9.3	TRUE	TRUE	FALSE	-1.78
WBGene00087585	CBG26171	11.0492	1.38092	0.415646	3.32235	0.000892627	0.00444313	chrII	12874674	12875542	+	WBGene00005548	sri-36	FALSE	TRUE	TRUE	-1.65
WBGene00087586	CBG26172	11.7229	1.66993	0.422364	3.95376	7.6932e-05	0.000539878	chrII	12870666	12873284	+	NaN	NaN	FALSE	TRUE	FALSE	-1.88
WBGene00087587	CBG26173	7.66593	2.00527	0.426265	4.70428	2.54761e-06	2.70145e-05	chrII	12688643	12689140	-	WBGene00019685	K12H6.5	FALSE	FALSE	FALSE	-1.32
WBGene00087621	CBG26207	20.5924	1.33629	0.398987	3.34921	0.000810417	0.00408852	chrII	13670112	13670760	+	NaN	NaN	FALSE	FALSE	FALSE	-2.04
WBGene00087633	CBG26219	149.438	2.32029	0.314199	7.38477	1.52716e-13	6.59316e-12	chrIV	315565	316710	+	WBGene00023501	F11E6.11	FALSE	TRUE	FALSE	-1.94
WBGene00087642	CBG26228	7.34089	1.30785	0.426556	3.06607	0.00216895	0.00946868	chrIV	924524	926229	-	NaN	NaN	FALSE	TRUE	FALSE	-1.89
WBGene00087722	CBG26308	9.73588	1.40748	0.424548	3.31525	0.000915596	0.00453866	chrIV	8828113	8828696	-	NaN	NaN	FALSE	FALSE	FALSE	-1.6
WBGene00087737	CBG26323	80.8867	1.77063	0.250689	7.06306	1.62878e-12	5.96063e-11	chrIV	7234213	7235744	+	NaN	NaN	FALSE	TRUE	FALSE	-2.38
WBGene00087765	CBG26351	265.054	1.52415	0.242612	6.28224	3.33739e-10	8.14227e-09	chrIV	7878124	7881085	+	WBGene00018346	F42C5.4	FALSE	FALSE	FALSE	-2.27
WBGene00087766	CBG26352	363.441	2.05869	0.274088	7.51108	5.86424e-14	2.66695e-12	chrIV	7880999	7883242	+	NaN	NaN	FALSE	FALSE	FALSE	-2.15
WBGene00087780	CBG26366	7.39289	1.94988	0.427871	4.55716	5.18487e-06	5.09166e-05	chrIV	8278770	8281422	+	WBGene00020686	T22D1.8	FALSE	FALSE	FALSE	-1.94
WBGene00087793	CBG26379	18.8778	2.30564	0.394515	5.84424	5.08871e-09	9.85028e-08	chrIV	6683678	6684537	-	NaN	NaN	FALSE	FALSE	FALSE	-2.12
WBGene00087802	CBG26388	22.3809	1.33902	0.414026	3.23416	0.00122003	0.00579989	chrIV	9517483	9519067	-	WBGene00235279	Y67D8C.22	FALSE	FALSE	FALSE	-1.61
WBGene00087824	CBG26410	6.67519	1.2838	0.412997	3.1085	0.00188039	0.00840277	chrIV	6121228	6121955	+	NaN	NaN	FALSE	FALSE	FALSE	-1.69
WBGene00087844	CBG26430	22.8861	1.33989	0.350554	3.82222	0.000132258	0.00085986	chrIV	5280444	5281262	-	NaN	NaN	FALSE	FALSE	FALSE	-0.65
WBGene00087916	CBG26502	62.5536	2.07674	0.270085	7.68923	1.48019e-14	7.24135e-13	chrIII	3729955	3732938	+	NaN	NaN	FALSE	FALSE	FALSE	-1.99
WBGene00087936	CBG26522	36.0597	1.55668	0.374604	4.15555	3.24508e-05	0.000253981	chrIV	16438646	16438881	+	NaN	NaN	FALSE	FALSE	FALSE	-1.9
WBGene00087954	CBG26540	460.855	1.85553	0.136228	13.6208	3.01415e-42	6.64426e-40	chrIV	17263387	17264566	+	NaN	NaN	FALSE	FALSE	FALSE	-2.37
WBGene00087958	CBG26544	6.21591	1.39733	0.422496	3.30732	0.000941923	0.00465177	chrIV	17359820	17362480	-	NaN	NaN	FALSE	FALSE	FALSE	-1.98
WBGene00087973	CBG26559	11.5659	1.42799	0.427651	3.33916	0.000840325	0.0042167	chrI	14030766	14032883	+	WBGene00013053	Y50E8A.10	FALSE	TRUE	TRUE	-1.82
WBGene00087990	CBG26576	14.0058	2.3299	0.409603	5.68821	1.28381e-08	2.29749e-07	chrI	13801686	13804799	-	NaN	NaN	FALSE	TRUE	FALSE	-1.11
WBGene00087991	CBG26577	4.39329	1.36195	0.416903	3.26683	0.00108759	0.0052657	chrI	13806688	13807248	+	NaN	NaN	FALSE	TRUE	FALSE	-1
WBGene00088265	CBG26851	240.746	1.95721	0.423385	4.62276	3.78675e-06	3.84149e-05	chrV	5499529	5503434	+	WBGene00018712	F52G3.4	TRUE	TRUE	TRUE	-1.11
WBGene00088279	CBG26865	12.4722	2.43075	0.419353	5.79643	6.77412e-09	1.26908e-07	chrV	429439	432154	-	NaN	NaN	FALSE	FALSE	FALSE	-1.82
WBGene00088283	CBG26869	15.6851	1.4181	0.391381	3.62333	0.000290838	0.00169237	chrV	464644	466126	+	NaN	NaN	FALSE	FALSE	FALSE	-1.83
WBGene00088302	CBG26888	177.479	3.09608	0.340372	9.09618	9.35648e-20	7.65556e-18	chrV	849517	849924	-	WBGene00020946	W02D7.11	FALSE	TRUE	FALSE	-1.39
WBGene00088317	CBG26903	64.3579	1.14922	0.236177	4.8659	1.13935e-06	1.32022e-05	chrV	1052348	1053678	-	WBGene00020720	T23B12.5	FALSE	TRUE	FALSE	-1.77
WBGene00088335	CBG26921	134.619	1.92159	0.278891	6.89013	5.57411e-12	1.88524e-10	cb25.fpc4095	8632	11400	+	NaN	NaN	FALSE	FALSE	FALSE	NA
WBGene00088345	CBG26931	45.9699	4.24436	0.373241	11.3716	5.79004e-30	8.82017e-28	chrV	1826394	1826902	+	NaN	NaN	FALSE	TRUE	FALSE	-1.86
WBGene00088346	CBG26932	8.58008	1.73647	0.426359	4.07278	4.64548e-05	0.000347336	chrV	1827651	1828230	+	NaN	NaN	FALSE	FALSE	FALSE	-1.85
WBGene00088605	CBG27191	194.802	1.1621	0.188925	6.15111	7.6943e-10	1.74749e-08	chrV	13421635	13432354	-	WBGene00018089	F36D4.4	FALSE	FALSE	FALSE	-1.91
WBGene00088633	CBG27219	7.80459	1.32223	0.426964	3.09682	0.00195612	0.00867909	chrV	14435361	14436474	-	NaN	NaN	FALSE	TRUE	FALSE	-0.39
WBGene00088652	CBG27238	9.42413	1.98205	0.425244	4.66098	3.14711e-06	3.25967e-05	chrV	15163384	15163835	-	NaN	NaN	FALSE	FALSE	FALSE	-1.74
WBGene00088653	CBG27239	105.145	1.08952	0.273713	3.98053	6.8761e-05	0.000488206	chrV	15182461	15185099	-	NaN	NaN	FALSE	TRUE	FALSE	-1.25
WBGene00088658	CBG27244	32.0095	1.39728	0.427494	3.26854	0.00108105	0.00523539	chrV	15330579	15330909	+	NaN	NaN	FALSE	TRUE	FALSE	-1.36
WBGene00088659	CBG27245	34.226	1.84032	0.424966	4.33052	1.48758e-05	0.000129101	chrV	15332155	15332519	+	NaN	NaN	FALSE	TRUE	FALSE	-1.38
WBGene00088661	CBG27247	4291.27	2.40249	0.25374	9.46831	2.84414e-21	2.62515e-19	chrV	15351676	15354904	+	NaN	NaN	FALSE	TRUE	FALSE	-1.72
WBGene00088662	CBG27248	13.9882	1.52872	0.422788	3.61579	0.000299428	0.00173535	chrV	15453586	15454758	+	NaN	NaN	FALSE	FALSE	FALSE	-1.65
WBGene00088725	CBG27311	24.2056	1.90794	0.391898	4.86847	1.12468e-06	1.30403e-05	chrV	17167835	17168449	+	NaN	NaN	FALSE	FALSE	FALSE	-1.76
WBGene00088750	CBG27336	146.935	1.08571	0.167056	6.49905	8.08292e-11	2.27061e-09	chrV	2253414	2255556	-	NaN	NaN	FALSE	FALSE	FALSE	-1.93
WBGene00088809	CBG27395	4010.7	1.92341	0.216145	8.89872	5.64966e-19	4.1841e-17	chrX	1	1462	+	NaN	NaN	FALSE	FALSE	FALSE	NA
WBGene00088816	CBG27402	25.8474	2.47057	0.365542	6.75865	1.39282e-11	4.46106e-10	chrX	1165932	1166866	+	NaN	NaN	FALSE	TRUE	FALSE	-1.43
WBGene00088878	CBG27464	230.804	1.27459	0.299726	4.25251	2.11386e-05	0.000175409	chrX	2832852	2834557	-	NaN	NaN	FALSE	TRUE	FALSE	-1.84
WBGene00088886	CBG27472	11.593	1.29516	0.407183	3.18077	0.00146882	0.00679705	chrX	3146173	3147886	-	NaN	NaN	FALSE	FALSE	FALSE	-1.95
WBGene00088957	CBG27543	105.949	1.00755	0.281234	3.58261	0.000340178	0.00193795	chrX	5624354	5625026	+	NaN	NaN	FALSE	FALSE	FALSE	-2.46
WBGene00088999	CBG27585	22.3872	1.84147	0.419393	4.3908	1.12932e-05	0.000100907	chrX	6713099	6714042	+	NaN	NaN	FALSE	FALSE	FALSE	-1.93
WBGene00089000	CBG27586	265.942	1.05033	0.291041	3.60889	0.000307504	0.00177666	chrX	6714418	6717455	-	NaN	NaN	FALSE	TRUE	FALSE	-1.82
WBGene00089073	CBG27659	65.3002	1.05983	0.252953	4.18981	2.79184e-05	0.000222599	chrX	9054018	9055682	-	NaN	NaN	FALSE	TRUE	FALSE	-2.13
WBGene00089409	CBG27995	19.7985	1.18045	0.376683	3.13379	0.00172565	0.00780812	chrX	16722197	16726561	+	NaN	NaN	FALSE	FALSE	FALSE	-2.18
WBGene00089425	CBG28011	5.81008	1.36202	0.422167	3.22625	0.00125423	0.00593897	chrX	17063452	17064001	-	NaN	NaN	FALSE	TRUE	FALSE	-1.52
WBGene00089526	CBG28112	279.415	2.09924	0.167598	12.5254	5.4192e-36	1.03612e-33	chrX	20186824	20189107	+	NaN	NaN	FALSE	TRUE	FALSE	-2.21
WBGene00089527	CBG28113	351.351	1.46375	0.199649	7.33158	2.27457e-13	9.44982e-12	chrX	20194315	20199450	+	NaN	NaN	FALSE	FALSE	FALSE	-1.92
WBGene00089528	CBG28114	205.416	1.06439	0.257935	4.12656	3.68226e-05	0.000283345	chrX	20199502	20201583	-	NaN	NaN	FALSE	FALSE	FALSE	-2.15
WBGene00089534	CBG28120	28.9741	1.50455	0.391505	3.84299	0.000121544	0.00079992	chrX	20317597	20318043	+	NaN	NaN	FALSE	FALSE	FALSE	-2.39
WBGene00089535	CBG28121	9.73095	1.75882	0.427399	4.11517	3.86893e-05	0.000296007	chrX	20318563	20318766	+	NaN	NaN	FALSE	TRUE	FALSE	-2.39
WBGene00270317	CBG29760	299.03	1.12632	0.210541	5.34963	8.81353e-08	1.32535e-06	chrIII	604302	605691	-	NaN	NaN	FALSE	FALSE	FALSE	-2.33
WBGene00270802	CBG29762	129.788	1.11023	0.199416	5.56739	2.5858e-08	4.38462e-07	cb25.fpc4366	11097	12099	-	NaN	NaN	FALSE	FALSE	FALSE	NA
WBGene00270823	CBG29796	80.326	1.73513	0.315008	5.5082	3.62529e-08	5.98477e-07	chrI	410058	412287	+	NaN	NaN	FALSE	FALSE	FALSE	-1.92
WBGene00270828	CBG29801	6.47286	1.3364	0.425783	3.13868	0.0016971	0.00770499	chrI	956054	957454	+	WBGene00194653	F36H2.6	FALSE	FALSE	FALSE	-0.56
WBGene00270832	CBG29805	24.5356	1.61379	0.39012	4.13666	3.52392e-05	0.000272729	chrI	1119856	1121173	-	NaN	NaN	TRUE	TRUE	FALSE	-1.6
WBGene00270835	CBG29808	10.3706	1.91966	0.427711	4.48822	7.18201e-06	6.78272e-05	chrI	1874431	1876884	-	NaN	NaN	FALSE	FALSE	FALSE	-0.28
WBGene00270858	CBG29831	8.16983	1.82014	0.425893	4.27371	1.92246e-05	0.000161312	chrI	5273654	5274442	-	NaN	NaN	FALSE	FALSE	FALSE	-2.5
WBGene00270890	CBG29863	21.8183	1.28388	0.384158	3.34206	0.000831602	0.00417965	chrI	9808080	9808755	+	NaN	NaN	FALSE	FALSE	FALSE	-2.01
WBGene00270901	CBG29874	10.1846	1.66163	0.421001	3.94685	7.91855e-05	0.000554447	chrI	10685712	10687128	+	NaN	NaN	FALSE	FALSE	FALSE	-1.69
WBGene00270916	CBG29889	19.591	1.92392	0.378781	5.07923	3.78963e-07	4.96291e-06	chrI	12421180	12423518	-	NaN	NaN	FALSE	FALSE	FALSE	-1.79
WBGene00270924	CBG29897	73.9471	1.96215	0.398776	4.92043	8.6355e-07	1.03455e-05	chrI	13110808	13113170	-	NaN	NaN	TRUE	FALSE	FALSE	-1.91
WBGene00270337	CBG29909	549.403	1.06533	0.175422	6.07295	1.25581e-09	2.73288e-08	chrI	12499336	12500720	+	WBGene00009468	F36D1.9	TRUE	FALSE	FALSE	-1.92
WBGene00270362	CBG29934	24.8156	1.99661	0.358987	5.56178	2.6703e-08	4.51974e-07	chrI	12628096	12630928	+	WBGene00014100	ZK849.1	FALSE	FALSE	FALSE	-1.59
WBGene00270381	CBG29953	197.428	1.44628	0.18385	7.86663	3.64325e-15	1.9068e-13	chrI	5730239	5730501	+	NaN	NaN	FALSE	TRUE	FALSE	-2.45
WBGene00270402	CBG29974	45.2311	2.64011	0.331924	7.95395	1.80655e-15	9.8399e-14	chrI	5033102	5036729	-	NaN	NaN	FALSE	FALSE	FALSE	-2.41
WBGene00270946	CBG30000	15.8014	2.89424	0.414124	6.98881	2.77229e-12	9.73417e-11	chrII	2491231	2492069	+	NaN	NaN	FALSE	TRUE	FALSE	-1.85
WBGene00270954	CBG30008	43.9602	2.20621	0.404924	5.44845	5.08097e-08	8.10231e-07	chrII	3920830	3922484	+	WBGene00009044	F22B5.6	FALSE	FALSE	TRUE	-1.66
WBGene00270971	CBG30025	24.6443	2.66787	0.42184	6.32437	2.54264e-10	6.36067e-09	chrII	5798354	5798919	+	WBGene00044316	F41G3.21	FALSE	TRUE	FALSE	-2.18
WBGene00270977	CBG30031	9.52653	1.28423	0.418411	3.06931	0.00214554	0.00939056	chrII	7187704	7187986	+	WBGene00206502	T01B7.13	FALSE	TRUE	FALSE	-2.31
WBGene00270987	CBG30041	5.1138	1.48959	0.412572	3.61049	0.000305617	0.00176794	chrII	9011902	9012250	-	WBGene00194935	M02G9.4	FALSE	TRUE	FALSE	-2.22
WBGene00271022	CBG30076	13.8995	2.65662	0.414478	6.40957	1.45935e-10	3.83503e-09	chrII	14221279	14222005	-	NaN	NaN	FALSE	FALSE	FALSE	-1.77
WBGene00270441	CBG30117	9.35724	1.4153	0.418741	3.3799	0.000725123	0.0037269	chrII	3121509	3124457	+	WBGene00014129	ZK892.5	FALSE	FALSE	TRUE	-1.84
WBGene00270442	CBG30118	4.65942	1.4866	0.412965	3.59983	0.00031842	0.00183014	chrII	11933495	11934462	-	NaN	NaN	FALSE	FALSE	FALSE	-1.8
WBGene00270486	CBG30162	49.5684	4.35666	0.378792	11.5015	1.29717e-30	2.09526e-28	chrII	16148100	16149501	-	WBGene00021096	W08F4.7	FALSE	TRUE	FALSE	-2.14
WBGene00271042	CBG30174	345.493	1.03664	0.114492	9.05424	1.37523e-19	1.11067e-17	chrIII	393407	397101	-	NaN	NaN	FALSE	FALSE	FALSE	-2.22
WBGene00271045	CBG30177	12.698	1.2991	0.405071	3.2071	0.00134081	0.00628699	chrIII	508313	509165	+	NaN	NaN	FALSE	TRUE	FALSE	-2.34
WBGene00271048	CBG30180	13.6165	1.44174	0.388342	3.71255	0.000205185	0.00126011	chrIII	857676	858077	-	NaN	NaN	FALSE	FALSE	FALSE	-1.81
WBGene00271069	CBG30201	10.0087	1.4895	0.414117	3.59681	0.000322142	0.00185039	chrIII	4874299	4875493	+	NaN	NaN	FALSE	FALSE	FALSE	-2.3
WBGene00271087	CBG30219	34.4985	2.23704	0.342245	6.53635	6.30367e-11	1.81711e-09	chrIII	7924531	7924795	+	NaN	NaN	FALSE	FALSE	FALSE	-2.36
WBGene00271088	CBG30220	37383.2	6.01393	0.198125	30.3543	2.2051e-202	2.06585e-199	chrIII	7936594	7938033	-	NaN	NaN	FALSE	FALSE	FALSE	-2.48
WBGene00271115	CBG30247	49.7173	1.85565	0.344811	5.38164	7.38093e-08	1.13451e-06	chrIII	12657822	12659296	-	NaN	NaN	FALSE	FALSE	FALSE	-2.24
WBGene00271125	CBG30257	216.486	1.0514	0.171278	6.13853	8.32874e-10	1.88108e-08	chrIII	14534298	14535809	+	NaN	NaN	FALSE	TRUE	FALSE	-2.32
WBGene00270499	CBG30261	63744.6	7.49563	0.13008	57.6231	0	0	chrIII	6042832	6043042	-	NaN	NaN	FALSE	TRUE	FALSE	-1.59
WBGene00270520	CBG30282	47.1591	1.1687	0.333714	3.5021	0.00046161	0.00252163	chrIII	4975394	4976125	-	NaN	NaN	FALSE	TRUE	FALSE	-1.67
WBGene00270533	CBG30295	30.6896	1.6323	0.405246	4.02792	5.62718e-05	0.000409462	chrIII	399695	404818	+	NaN	NaN	FALSE	FALSE	FALSE	-2.22
WBGene00270540	CBG30302	20.1161	1.40923	0.386474	3.64638	0.000265964	0.00156513	chrIII	13697054	13698275	+	NaN	NaN	FALSE	TRUE	FALSE	-1
WBGene00271147	CBG30338	77.8287	3.25969	0.362678	8.98785	2.52111e-19	1.96825e-17	chrIV	5069247	5070502	+	NaN	NaN	FALSE	FALSE	FALSE	-1.01
WBGene00271156	CBG30347	10.4568	1.82829	0.419737	4.3558	1.32581e-05	0.000116792	chrIV	7327112	7328301	-	NaN	NaN	FALSE	TRUE	FALSE	-2.24
WBGene00271168	CBG30359	5.1337	1.29418	0.422591	3.0625	0.00219496	0.00954666	chrIV	11245472	11246054	-	WBGene00017542	F17E9.5	FALSE	FALSE	FALSE	-2.06
WBGene00271173	CBG30364	1228.93	3.47386	0.376384	9.22957	2.71709e-20	2.3141e-18	chrIV	12006934	12007332	+	WBGene00194658	R09E10.13	FALSE	TRUE	TRUE	-1.23
WBGene00271177	CBG30368	6.74431	1.47232	0.42773	3.44218	0.00057705	0.00306545	chrIV	12825220	12825643	-	WBGene00195010	Y37E11AL.12	FALSE	FALSE	FALSE	-2.09
WBGene00271189	CBG30380	37.5748	2.28157	0.415505	5.49106	3.99521e-08	6.55501e-07	chrIV	14564835	14566526	+	NaN	NaN	FALSE	FALSE	FALSE	-1.24
WBGene00271210	CBG30401	23.9178	1.05596	0.34285	3.07996	0.00207031	0.00909955	chrIV	17376264	17378191	-	WBGene00019369	K03H6.4	FALSE	TRUE	FALSE	-1.44
WBGene00270572	CBG30420	7.53405	1.34572	0.424189	3.17246	0.00151156	0.00696557	chrIV	5787251	5789776	+	NaN	NaN	FALSE	TRUE	FALSE	-1.84
WBGene00270616	CBG30464	117.628	3.55658	0.385331	9.22994	2.70773e-20	2.3141e-18	chrIV	3239197	3241064	-	NaN	NaN	FALSE	TRUE	FALSE	-1.27
WBGene00271221	CBG30491	416.748	3.43539	0.169293	20.2925	1.49654e-91	7.57857e-89	chrV	1832883	1835355	+	WBGene00045308	C37H5.14	FALSE	TRUE	TRUE	-1.7
WBGene00271292	CBG30562	24.1124	1.82583	0.425688	4.28914	1.79365e-05	0.000151669	chrV	16047266	16047756	+	NaN	NaN	FALSE	TRUE	FALSE	-1.67
WBGene00270643	CBG30589	16.3826	1.34845	0.414928	3.24984	0.00115471	0.00553489	chrV	15248197	15249345	-	WBGene00011622	T08G5.1	FALSE	TRUE	FALSE	-1.92
WBGene00270645	CBG30591	44.5814	1.45303	0.275258	5.2788	1.30031e-07	1.87993e-06	chrV	1919827	1920726	+	NaN	NaN	FALSE	FALSE	FALSE	-1.86
WBGene00270657	CBG30603	19.7908	1.69564	0.382841	4.4291	9.46291e-06	8.60712e-05	chrV	14265513	14267900	+	WBGene00005211	srg-54	FALSE	FALSE	FALSE	-1.54
WBGene00270676	CBG30622	14.6332	1.25998	0.378756	3.32662	0.000879048	0.00438518	chrV	10077586	10078445	+	WBGene00219325	F17C11.22	FALSE	FALSE	FALSE	-2.14
WBGene00270694	CBG30640	34.8259	2.86851	0.349714	8.20245	2.35533e-16	1.41448e-14	chrV	10830392	10831529	+	WBGene00194912	ZK856.18	FALSE	FALSE	FALSE	-2.42
WBGene00270720	CBG30666	38.3928	3.52193	0.361743	9.736	2.11731e-22	2.1215e-20	chrV	1824545	1824831	-	NaN	NaN	FALSE	FALSE	FALSE	-1.86
WBGene00270728	CBG30674	17.9957	1.8788	0.398102	4.7194	2.3654e-06	2.52251e-05	chrV	374005	375827	-	WBGene00011191	R10D12.10	FALSE	FALSE	FALSE	-1.88
WBGene00270734	CBG30680	30.1679	1.26971	0.313578	4.04911	5.14129e-05	0.00037956	chrV	6233635	6234381	+	NaN	NaN	FALSE	TRUE	FALSE	-1.39
WBGene00271320	CBG30702	46.6155	1.10952	0.357548	3.10314	0.00191476	0.00852588	chrX	2216583	2217304	+	NaN	NaN	FALSE	TRUE	FALSE	-1.69
WBGene00271323	CBG30705	11916.2	1.29106	0.0952008	13.5615	6.77531e-42	1.45918e-39	chrX	2831306	2833115	-	NaN	NaN	FALSE	TRUE	FALSE	-1.84
WBGene00271366	CBG30748	4.22967	1.30781	0.412233	3.1725	0.00151134	0.00696557	chrX	13458968	13460545	-	NaN	NaN	FALSE	FALSE	FALSE	-2.5
WBGene00271368	CBG30750	18.5998	1.6692	0.39191	4.25914	2.05212e-05	0.000170897	chrX	14987731	14988157	+	NaN	NaN	FALSE	FALSE	FALSE	-2.28
WBGene00271397	CBG30779	10.5158	1.34345	0.41172	3.26301	0.00110237	0.00532227	chrX	21337940	21338333	+	NaN	NaN	FALSE	TRUE	FALSE	-2.42
WBGene00270785	CBG30821	11.2324	1.85133	0.413827	4.47369	7.68823e-06	7.21354e-05	chrX	19177474	19177998	-	NaN	NaN	FALSE	FALSE	FALSE	-1.14
WBGene00271495	CBG30892	6.90736	1.66323	0.42806	3.88552	0.000102112	0.000687238	chrI	13463638	13467842	+	NaN	NaN	FALSE	TRUE	FALSE	-0.89
WBGene00271570	CBG30934	19.6816	2.87362	0.425572	6.75238	1.45436e-11	4.6423e-10	chrI	9774125	9775258	-	WBGene00006624	try-6	FALSE	FALSE	TRUE	-2.26
WBGene00271573	CBG30937	51.3617	1.30579	0.264112	4.94408	7.65056e-07	9.3023e-06	chrI	14439973	14445658	-	WBGene00012011	T25B9.5	FALSE	TRUE	FALSE	-1.93
WBGene00271587	CBG30950	10.8114	1.54835	0.427948	3.61809	0.000296789	0.00172379	chrV	8548493	8549742	+	WBGene00005249	srh-25	FALSE	TRUE	FALSE	-1.79
WBGene00271588	CBG30951	26.058	1.40236	0.418103	3.3541	0.000796247	0.00402897	chrV	8549823	8552395	+	WBGene00045400	C54D10.13	FALSE	TRUE	FALSE	-1.91
WBGene00271599	CBG30961	12.8113	1.98668	0.411738	4.8251	1.39936e-06	1.58863e-05	chrIV	16176044	16179491	+	WBGene00235350	Y54G2A.77	FALSE	TRUE	TRUE	-0.25
WBGene00271614	CBG30974	652.319	3.70431	0.265586	13.9477	3.25133e-44	7.81028e-42	chrV	4042235	4043386	-	WBGene00016788	C49G7.10	FALSE	TRUE	TRUE	-1.76
WBGene00271617	CBG30977	107.647	1.1214	0.243858	4.59857	4.25393e-06	4.26463e-05	chrI	9872485	9873058	+	WBGene00002225	klp-15	FALSE	FALSE	FALSE	-2.07
WBGene00271627	CBG30987	259.727	1.02502	0.167526	6.1186	9.44006e-10	2.10821e-08	chrIV	16635978	16637566	+	WBGene00022077	vamp-7	FALSE	TRUE	FALSE	-2.22
WBGene00271663	CBG30997	58.7905	1.69026	0.259194	6.52122	6.9739e-11	1.99192e-09	chrIII	7920923	7921363	-	WBGene00018155	F37C12.14	FALSE	FALSE	FALSE	-2.35
WBGene00271670	CBG31004	1339.88	2.63077	0.154893	16.9844	1.07205e-64	3.71981e-62	chrV	15180156	15181479	-	WBGene00050899	T10C6.15	FALSE	TRUE	FALSE	-1.38
WBGene00271764	CBG31063	10.6395	1.68348	0.424523	3.96559	7.32135e-05	0.000516103	chrV	4137933	4141667	+	WBGene00021449	mltn-7	FALSE	FALSE	FALSE	-1.74
WBGene00271834	CBG31070	39.5165	2.62279	0.3769	6.95885	3.43068e-12	1.19038e-10	chrV	15170983	15174220	-	NaN	NaN	FALSE	FALSE	FALSE	-1.59
WBGene00271835	CBG31071	71.8392	1.59504	0.266247	5.99084	2.08759e-09	4.36067e-08	chrV	15168950	15170667	-	WBGene00045405	D1086.18	FALSE	TRUE	FALSE	-1.74
WBGene00284891	CBG31129	368.831	3.30214	0.255955	12.9012	4.42876e-38	8.73492e-36	chrI	8839620	8840010	-	WBGene00010133	F55H12.2	FALSE	FALSE	FALSE	-2.29
WBGene00303118	CBG31191	41.292	1.29601	0.350047	3.70238	0.000213588	0.00130146	cb25.NA_191	17	1211	-	WBGene00017951	panl-2	FALSE	FALSE	FALSE	NA
WBGene00303161	CBG31228	7.4548	1.56215	0.428062	3.64936	0.000262896	0.00154951	chrV	16998279	16999468	-	WBGene00023506	srz-11	FALSE	TRUE	FALSE	-1.43
WBGene00303198	CBG31262	4.37334	1.31237	0.413933	3.1705	0.00152179	0.00700583	chrIV	5878253	5887226	+	WBGene00194816	ZK616.61	FALSE	TRUE	TRUE	-1.63
WBGene00303228	CBG31291	6.42486	1.42332	0.427346	3.33061	0.000866551	0.00433322	chrV	2003529	2004596	-	NaN	NaN	FALSE	FALSE	FALSE	-1.98
WBGene00303262	CBG31322	82.0999	1.32402	0.245818	5.38617	7.19745e-08	1.10995e-06	chrX	14110328	14111439	+	NaN	NaN	FALSE	TRUE	FALSE	-2.21
WBGene00303296	CBG31355	1402.81	1.08945	0.164831	6.60949	3.85641e-11	1.15427e-09	chrII	9170269	9176215	+	WBGene00017563	F18C5.10	FALSE	TRUE	FALSE	-2.36
WBGene00303314	CBG31373	34.4633	1.63208	0.426216	3.82923	0.000128543	0.000838913	chrV	15322640	15322939	+	NaN	NaN	FALSE	TRUE	FALSE	-1.57
WBGene00303316	CBG31375	44.3885	1.68463	0.416696	4.04282	5.2812e-05	0.000387902	chrV	15341361	15341831	+	NaN	NaN	FALSE	TRUE	FALSE	-1.37
WBGene00303389	CBG31430	139.622	1.21322	0.290804	4.17195	3.02009e-05	0.000238665	chrV	11050995	11053351	+	WBGene00008850	F15B9.6	FALSE	TRUE	TRUE	-2
WBGene00303408	CBG31446	163.268	1.00786	0.185652	5.42876	5.67461e-08	8.94993e-07	chrI	7842163	7844645	+	WBGene00015972	C18E3.3	FALSE	FALSE	FALSE	-2.25
WBGene00030548	Cbr-abhd-5.2	4001.56	3.03146	0.220617	13.7408	5.78391e-43	1.3057e-40	chrV	1821228	1823948	-	WBGene00016506	abhd-5.1	FALSE	TRUE	FALSE	-1.86
WBGene00033579	Cbr-acdh-4	30.6214	3.58574	0.393978	9.10136	8.92078e-20	7.33108e-18	chrI	9808957	9811186	+	WBGene00020419	acdh-4	FALSE	FALSE	FALSE	-1.99
WBGene00037591	Cbr-acdh-6	143.401	2.17742	0.266621	8.16673	3.16874e-16	1.87888e-14	chrIII	6705545	6708165	-	WBGene00015335	acdh-6	FALSE	TRUE	FALSE	-2.35
WBGene00027072	Cbr-acs-18	174.717	3.76049	0.306058	12.2869	1.06579e-34	1.95781e-32	chrIV	11962522	11965244	-	WBGene00019920	acs-15	FALSE	TRUE	TRUE	-1.58
WBGene00038969	Cbr-acs-6	43.2923	3.05078	0.331791	9.19488	3.75422e-20	3.15438e-18	chrI	15158228	15160738	+	NaN	NaN	FALSE	FALSE	FALSE	-1.62
WBGene00034856	Cbr-adt-3	536.392	1.42004	0.21401	6.63539	3.23643e-11	9.74935e-10	chrX	9061725	9068369	+	WBGene00020567	adt-3	FALSE	FALSE	FALSE	-2.25
WBGene00034831	Cbr-aex-4	341.215	1.89381	0.291578	6.49504	8.30103e-11	2.32491e-09	chrX	8881305	8883270	+	WBGene00006454	aex-4	FALSE	FALSE	FALSE	-2.3
WBGene00032118	Cbr-aexr-2	51.2028	1.95195	0.29648	6.58376	4.58702e-11	1.3535e-09	chrX	12084138	12087092	-	WBGene00016090	aexr-2	FALSE	FALSE	FALSE	-2.35
WBGene00032523	Cbr-aip-1	2723.42	3.20642	0.129956	24.6732	2.07657e-134	1.3896e-131	chrV	422442	423925	+	WBGene00000097	aip-1	FALSE	TRUE	TRUE	-2.41
WBGene00037218	Cbr-allo-1	2724.67	1.27696	0.153775	8.3041	1.00583e-16	6.34553e-15	chrIV	11774454	11776666	-	WBGene00011292	allo-1	FALSE	FALSE	FALSE	-1.74
WBGene00042212	Cbr-amt-2	215.459	2.53293	0.182921	13.8471	1.32476e-43	3.02708e-41	chrIV	10062903	10065237	-	WBGene00000134	amt-2	FALSE	FALSE	TRUE	-2.33
WBGene00032261	Cbr-arl-3	218.092	1.41009	0.140402	10.0432	9.84195e-24	1.10424e-21	chrII	4462517	4463830	-	WBGene00000188	arl-3	FALSE	FALSE	FALSE	-2.15
WBGene00029410	Cbr-arrd-24	14.9666	1.69112	0.392954	4.3036	1.68042e-05	0.00014351	chrX	19831924	19833285	-	WBGene00009852	arrd-24	FALSE	FALSE	FALSE	-1.9
WBGene00024305	Cbr-arrd-8	19.4743	1.83982	0.405341	4.53894	5.65383e-06	5.48606e-05	chrII	184665	186163	+	WBGene00012467	arrd-8	FALSE	FALSE	TRUE	-2.2
WBGene00032346	Cbr-asm-1	1515.4	3.03328	0.126365	24.0041	2.52228e-127	1.57533e-124	chrII	5554971	5559479	+	WBGene00000211	asm-1	TRUE	TRUE	FALSE	-2.4
WBGene00034951	Cbr-atg-16.1	650.262	1.12556	0.243698	4.61865	3.86253e-06	3.90975e-05	chrX	9736337	9743501	-	WBGene00017178	atg-16.1	FALSE	TRUE	FALSE	-2.31
WBGene00038841	Cbr-atgl-1	1773.24	1.03651	0.177092	5.85297	4.82879e-09	9.4051e-08	chrIII	3794815	3798304	+	WBGene00015484	atgl-1	FALSE	TRUE	FALSE	-1.44
WBGene00036110	Cbr-bath-23	21.3439	1.29569	0.373391	3.47007	0.000520331	0.00279353	chrII	15301449	15302473	-	NaN	NaN	FALSE	TRUE	FALSE	-1.29
WBGene00036808	Cbr-bath-26.1	9.91432	1.45812	0.428055	3.40638	0.00065831	0.00342537	chrII	15222583	15223242	+	NaN	NaN	FALSE	TRUE	FALSE	-0.82
WBGene00036807	Cbr-bath-26.2	137.209	1.48529	0.400164	3.7117	0.000205872	0.00126266	chrII	15226258	15233391	-	NaN	NaN	FALSE	FALSE	FALSE	-1.32
WBGene00039024	Cbr-bec-1	1391.51	1.27024	0.236545	5.36997	7.87477e-08	1.20252e-06	chrIV	6176515	6179103	-	WBGene00000247	bec-1	FALSE	TRUE	FALSE	-1.68
WBGene00031507	Cbr-best-5	172.737	1.45609	0.334663	4.35092	1.35571e-05	0.000118867	chrIII	9368170	9371033	+	WBGene00007404	best-5	FALSE	FALSE	FALSE	-2.48
WBGene00027757	Cbr-bgnt-1.5	19.267	1.4068	0.392545	3.5838	0.000338632	0.00193083	chrX	17057968	17061790	-	WBGene00015982	bgnt-1.4	FALSE	TRUE	FALSE	-1.76
WBGene00032644	Cbr-bir-2	159.157	1.34365	0.194828	6.89661	5.32564e-12	1.80773e-10	chrV	12713	13936	+	WBGene00000250	bir-2	FALSE	FALSE	FALSE	-1.57
WBGene00029663	Cbr-blos-8	575.639	1.89748	0.238521	7.95521	1.78833e-15	9.76905e-14	chrX	17905526	17906486	+	WBGene00010981	blos-8	FALSE	FALSE	FALSE	-2.01
WBGene00032017	Cbr-bris-1	2660.64	1.43416	0.151308	9.47843	2.58142e-21	2.39446e-19	chrIV	13059455	13069263	-	WBGene00019726	bris-1	FALSE	FALSE	FALSE	-1.7
WBGene00025101	Cbr-cbs-1	6621.55	1.37195	0.0819474	16.7418	6.49567e-63	2.02849e-60	chrX	3455115	3458058	-	WBGene00013866	cbs-1	FALSE	TRUE	FALSE	-2.31
WBGene00024207	Cbr-cdc-25.4	14.2486	2.27858	0.425982	5.349	8.84418e-08	1.3289e-06	chrII	889123	892482	-	WBGene00000389	cdc-25.4	TRUE	FALSE	FALSE	-1.6
WBGene00029255	Cbr-cdc-37	7010.39	1.89596	0.225318	8.41459	3.94275e-17	2.56511e-15	chrII	16151935	16154048	-	WBGene00021097	cdc-37	FALSE	FALSE	FALSE	-2.09
WBGene00032299	Cbr-ceh-7	19.2034	1.34877	0.375966	3.58748	0.000333885	0.0019066	chrII	4698223	4700307	-	WBGene00000432	ceh-7	FALSE	TRUE	FALSE	-1.87
WBGene00032083	Cbr-chp-1	1603.26	1.23604	0.205272	6.02147	1.72844e-09	3.67186e-08	chrI	6546036	6547700	-	WBGene00000502	chp-1	FALSE	FALSE	FALSE	-2.23
WBGene00032928	Cbr-chs-1	492.234	1.08905	0.197252	5.52108	3.36915e-08	5.59643e-07	chrI	376006	380519	+	WBGene00000496	chs-1	TRUE	TRUE	FALSE	-2.18
WBGene00035662	Cbr-clec-101	35.295	1.01829	0.311376	3.2703	0.00107434	0.00520828	chrI	13605572	13607034	+	WBGene00008853	clec-101	FALSE	FALSE	TRUE	-1.61
WBGene00270491	Cbr-clec-140.1	48.3467	1.8329	0.397259	4.61387	3.9523e-06	3.98785e-05	chrII	2797838	2800394	+	WBGene00020220	clec-140	FALSE	TRUE	TRUE	-1.61
WBGene00023841	Cbr-clec-196	70.5799	1.6822	0.289621	5.80828	6.31175e-09	1.18738e-07	chrIV	500809	501556	+	WBGene00009156	clec-196	FALSE	FALSE	TRUE	-0.17
WBGene00041486	Cbr-clec-221	65.7951	2.33147	0.319625	7.29439	3.00008e-13	1.23003e-11	chrV	10092032	10092841	+	WBGene00008916	clec-221	FALSE	TRUE	TRUE	-2.44
WBGene00032116	Cbr-clec-266	257.183	4.08273	0.283512	14.4006	5.13261e-47	1.31739e-44	chrX	12074982	12080767	-	WBGene00016088	clec-266	FALSE	TRUE	TRUE	-2.44
WBGene00035661	Cbr-clec-59.1	27.4022	1.02532	0.325541	3.14959	0.00163499	0.00746646	chrI	13601996	13605216	-	NaN	NaN	FALSE	TRUE	FALSE	-1.49
WBGene00029846	Cbr-clec-99	4.23157	1.35072	0.416468	3.24327	0.00118168	0.00564535	chrI	14104344	14106006	+	WBGene00044511	clec-181	TRUE	TRUE	TRUE	-1.08
WBGene00045470	Cbr-cnc-4	504.998	1.53338	0.305184	5.02444	5.04917e-07	6.4053e-06	chrV	6858999	6859393	+	NaN	NaN	FALSE	FALSE	FALSE	-2.23
WBGene00030064	Cbr-cnnm-5	24.324	1.25437	0.400896	3.12892	0.00175449	0.00791762	chrI	6038866	6045109	+	WBGene00011260	cnnm-5	FALSE	FALSE	TRUE	-2.43
WBGene00036054	Cbr-cnp-3	6074.7	4.7116	0.0814646	57.8361	0	0	chrX	2840887	2842910	-	WBGene00019578	K09E3.7	FALSE	TRUE	TRUE	-1.41
WBGene00039897	Cbr-cnt-1	2718.85	1.11132	0.197902	5.61552	1.95975e-08	3.39371e-07	chrII	12325330	12334473	+	WBGene00000565	cnt-1	FALSE	FALSE	FALSE	-1.74
WBGene00034903	Cbr-coel-1	702.567	2.27592	0.274286	8.29762	1.06221e-16	6.67871e-15	chrX	9372162	9375948	+	WBGene00016866	coel-1	FALSE	FALSE	FALSE	-2.02
WBGene00040090	Cbr-col-102	7.36885	1.39353	0.428059	3.25545	0.00113211	0.00544425	chrIV	13545169	13546302	-	WBGene00000676	col-102	FALSE	FALSE	FALSE	-1.97
WBGene00036558	Cbr-col-105	31.9614	1.11024	0.311256	3.56697	0.00036113	0.00204118	chrIII	8172999	8175257	-	WBGene00000679	col-105	FALSE	TRUE	FALSE	-2.32
WBGene00034601	Cbr-col-106	108.086	1.04023	0.26943	3.86084	0.000113	0.000750295	chrIV	16059121	16060435	+	WBGene00000680	col-106	FALSE	FALSE	FALSE	-0.29
WBGene00038572	Cbr-col-146	1546.83	1.16735	0.381259	3.06183	0.00219989	0.00956226	chrV	13661012	13661974	-	WBGene00000719	col-146	FALSE	FALSE	TRUE	-1.05
WBGene00029500	Cbr-col-183	15.0222	1.90743	0.401215	4.75413	1.99301e-06	2.16859e-05	chrX	19167617	19168760	-	WBGene00000756	col-183	FALSE	FALSE	FALSE	-1.66
WBGene00033498	Cbr-col-56	49.7846	2.64257	0.295624	8.93896	3.92847e-19	2.95613e-17	chrI	9480192	9481851	-	WBGene00000633	col-56	FALSE	FALSE	FALSE	-2.31
WBGene00037305	Cbr-col-71	99.9031	2.57203	0.242519	10.6055	2.81064e-26	3.65715e-24	chrII	13339212	13340526	+	WBGene00000647	col-71	FALSE	FALSE	FALSE	-0.61
WBGene00040166	Cbr-col-72	10.8697	2.19591	0.425808	5.15705	2.50867e-07	3.41854e-06	chrII	13413058	13414904	+	WBGene00000648	col-72	FALSE	FALSE	FALSE	-1.77
WBGene00025742	Cbr-col-84	57.591	1.44818	0.258904	5.59348	2.22559e-08	3.82577e-07	chrII	8914370	8915526	-	WBGene00000659	col-84	FALSE	FALSE	TRUE	-2.09
WBGene00035925	Cbr-col-97	932.206	2.80159	0.172652	16.2268	3.25984e-59	9.69517e-57	chrIII	1586615	1588628	-	WBGene00000672	col-97	FALSE	TRUE	TRUE	-1.61
WBGene00025614	Cbr-cpb-2	41.0561	1.28964	0.280717	4.59409	4.34647e-06	4.35042e-05	chrII	9551695	9553749	-	WBGene00000771	cpb-2	FALSE	TRUE	FALSE	-2.37
WBGene00039757	Cbr-cpg-7	131.432	1.04682	0.260297	4.02164	5.77955e-05	0.00041876	chrII	11615310	11616106	-	WBGene00010723	cpg-7	FALSE	TRUE	FALSE	-2.26
WBGene00041124	Cbr-cpl-1	37678.1	1.97766	0.164693	12.0082	3.21833e-33	5.4326e-31	chrV	15912569	15915764	+	WBGene00000776	cpl-1	FALSE	FALSE	FALSE	-0.67
WBGene00039390	Cbr-cpn-4	1141.87	1.54554	0.218082	7.08697	1.37082e-12	5.09622e-11	chrI	12375560	12379295	-	WBGene00000780	cpn-4	TRUE	TRUE	TRUE	-1.94
WBGene00041713	Cbr-cpr-1	20446.4	2.26442	0.220715	10.2595	1.07247e-24	1.29644e-22	chrV	9036115	9037251	-	WBGene00000781	cpr-1	FALSE	FALSE	FALSE	-2.49
WBGene00038270	Cbr-cpr-4	34009.5	1.32995	0.157464	8.44611	3.01177e-17	2.00112e-15	chrV	12313070	12314406	+	WBGene00000784	cpr-4	FALSE	TRUE	FALSE	-1.95
WBGene00032114	Cbr-cpr-6	13172.8	1.91377	0.179192	10.68	1.26268e-26	1.67793e-24	chrX	12065759	12067578	+	WBGene00000786	cpr-6	FALSE	TRUE	FALSE	-2.34
WBGene00029792	Cbr-cpt-1	11293.4	1.70649	0.241971	7.05245	1.75789e-12	6.38325e-11	chrII	14040142	14044935	-	WBGene00012907	cpt-1	TRUE	TRUE	FALSE	-1.52
WBGene00042699	Cbr-cutl-4	41.0135	1.48085	0.279549	5.29729	1.17535e-07	1.71649e-06	chrV	18238193	18243676	+	WBGene00012304	cutl-4	FALSE	TRUE	FALSE	-1.72
WBGene00025740	Cbr-cyn-2	37.0268	1.4215	0.309968	4.58596	4.51913e-06	4.50398e-05	chrII	8917248	8917936	-	WBGene00000878	cyn-2	FALSE	FALSE	FALSE	-2.21
WBGene00034232	Cbr-cyp-23A1	694.953	1.94033	0.266361	7.2846	3.22625e-13	1.31128e-11	chrII	2620489	2626238	+	WBGene00015135	cyp-23A1	FALSE	TRUE	FALSE	-1.63
WBGene00026819	Cbr-cyp-36A1	317.774	1.42973	0.306354	4.66693	3.05727e-06	3.18069e-05	chrI	4330319	4332919	-	WBGene00007913	cyp-36A1	FALSE	TRUE	FALSE	-2.11
WBGene00036679	Cbr-dct-1	1204.74	1.58038	0.28019	5.64038	1.69674e-08	2.97906e-07	chrX	13673110	13676565	+	WBGene00015776	dct-1	FALSE	TRUE	FALSE	-2.38
WBGene00037931	Cbr-ddn-1.2	380.585	1.36323	0.417783	3.263	0.0011024	0.00532227	cb25.fpc4095	63105	64641	-	WBGene00015224	B0507.7	FALSE	FALSE	FALSE	NA
WBGene00041272	Cbr-dhhc-14	807.757	1.09402	0.0954674	11.4596	2.10539e-30	3.33764e-28	chrX	16298080	16302471	-	WBGene00044071	dhhc-14	FALSE	FALSE	FALSE	-2.15
WBGene00271432	Cbr-dhs-31.2	39.9607	1.29124	0.377813	3.41767	0.000631595	0.00330934	chrIV	9778884	9779907	+	WBGene00011424	dhs-31	FALSE	FALSE	FALSE	-2.15
WBGene00038932	Cbr-dnj-12	13492.8	1.61009	0.210096	7.66361	1.80772e-14	8.75227e-13	chrI	14980450	14982166	-	WBGene00001030	dnj-12	FALSE	FALSE	FALSE	-2.21
WBGene00025832	Cbr-dnj-13	14145	2.11418	0.0722656	29.2557	3.79853e-188	3.38919e-185	chrII	8384885	8385990	+	WBGene00001031	dnj-13	FALSE	FALSE	TRUE	-1.98
WBGene00042507	Cbr-dod-24	90.8473	1.46831	0.321024	4.57384	4.78857e-06	4.73225e-05	chrIV	10161690	10162870	-	WBGene00007872	C32H11.9	FALSE	FALSE	FALSE	-2.3
WBGene00087413	Cbr-dpy-28	9673.9	1.10919	0.17562	6.31586	2.68661e-10	6.71188e-09	chrIII	5237683	5243590	+	WBGene00001087	dpy-28	FALSE	FALSE	FALSE	-2.5
WBGene00042430	Cbr-dro-1	1691.61	1.98772	0.256978	7.73499	1.03409e-14	5.13943e-13	chrIII	13361413	13363232	-	WBGene00001092	dro-1	FALSE	FALSE	FALSE	-2.11
WBGene00034321	Cbr-dsl-3	47.1121	1.18968	0.320151	3.716	0.000202403	0.0012471	chrIV	17425221	17426456	+	WBGene00001105	dsl-3	FALSE	FALSE	FALSE	-1.23
WBGene00024069	Cbr-dylt-3	55.7417	1.16288	0.291508	3.98918	6.63015e-05	0.000473434	chrII	3475413	3476196	+	WBGene00011469	dylt-3	FALSE	FALSE	FALSE	-1.85
WBGene00026258	Cbr-ech-9	130.225	2.80674	0.405897	6.9149	4.68177e-12	1.60664e-10	chrIV	9630217	9632005	+	WBGene00001158	ech-9	FALSE	FALSE	TRUE	-2.43
WBGene00039967	Cbr-efk-1	2743.28	1.17259	0.197561	5.93535	2.93211e-09	5.97161e-08	chrIII	3223195	3231750	+	WBGene00001160	efk-1	FALSE	TRUE	FALSE	-1.91
WBGene00029495	Cbr-efn-3	18.9199	2.96239	0.402851	7.35357	1.92987e-13	8.16252e-12	chrX	19179783	19181341	-	WBGene00001164	efn-3	FALSE	FALSE	TRUE	-1.39
WBGene00029591	Cbr-egrh-1	1360.57	1.45938	0.224264	6.50741	7.64559e-11	2.16185e-09	chrX	18427141	18429932	-	WBGene00043705	egrh-2	FALSE	FALSE	FALSE	-1.95
WBGene00032522	Cbr-end-3.1	312.723	4.73772	0.302662	15.6535	3.14489e-55	8.79489e-53	chrV	424064	425260	-	WBGene00001311	end-3	FALSE	FALSE	TRUE	-1.95
WBGene00032520	Cbr-end-3.2	34.6952	3.64287	0.388963	9.36559	7.56267e-21	6.81259e-19	chrV	428272	429169	+	WBGene00001311	end-3	FALSE	FALSE	TRUE	-1.91
WBGene00030156	Cbr-epg-4	276.951	1.41161	0.198035	7.12812	1.01753e-12	3.8361e-11	chrIV	12630252	12631627	+	WBGene00018150	epg-4	FALSE	FALSE	FALSE	-2.36
WBGene00024779	Cbr-faah-2	4767.91	2.08405	0.253335	8.22646	1.92834e-16	1.18076e-14	chrIV	11332761	11334866	-	WBGene00015048	faah-2	FALSE	FALSE	FALSE	-2.37
WBGene00028498	Cbr-fat-6	16529.9	1.02978	0.0847257	12.1543	5.44426e-34	9.71515e-32	chrIV	8947533	8949492	-	WBGene00001398	fat-6	FALSE	TRUE	FALSE	-1.95
WBGene00027135	Cbr-fbxa-179.1	46.3823	1.17469	0.287367	4.08776	4.35555e-05	0.000328441	chrX	6614333	6615791	-	NaN	NaN	TRUE	TRUE	FALSE	-2.11
WBGene00042827	Cbr-fbxc-33	25.644	1.3477	0.350913	3.84057	0.000122751	0.000807012	chrII	15526907	15530044	-	NaN	NaN	FALSE	FALSE	FALSE	-1.86
WBGene00035318	Cbr-fer-1	52.4542	2.53221	0.424125	5.97044	2.36613e-09	4.8988e-08	chrI	3633109	3640513	+	WBGene00001414	fer-1	FALSE	FALSE	FALSE	-2.11
WBGene00038211	Cbr-fil-2	109.496	3.58141	0.367484	9.74575	1.92354e-22	1.93771e-20	chrV	12014933	12016144	+	WBGene00019668	fil-2	FALSE	TRUE	TRUE	-2.15
WBGene00086692	Cbr-fipr-26	49.5172	2.34416	0.398726	5.87913	4.12427e-09	8.1774e-08	chrI	8762109	8762593	+	WBGene00009963	fipr-26	FALSE	TRUE	FALSE	-2.27
WBGene00041223	Cbr-fis-2	706.437	1.39285	0.291407	4.77972	1.75536e-06	1.94042e-05	chrX	16594420	16598759	+	WBGene00001425	fis-2	FALSE	FALSE	FALSE	-2.03
WBGene00027120	Cbr-fkb-6	13046.9	1.80426	0.219638	8.21467	2.12745e-16	1.29004e-14	chrIV	12232377	12234139	+	WBGene00001431	fkb-6	FALSE	TRUE	FALSE	-1.97
WBGene00039044	Cbr-fkh-7	1627.02	1.12816	0.190619	5.91839	3.25101e-09	6.57111e-08	chrIV	6074433	6102346	+	WBGene00001439	fkh-7	FALSE	TRUE	FALSE	-2.03
WBGene00033499	Cbr-frk-1	57.0397	3.09523	0.323937	9.55504	1.23533e-21	1.17495e-19	chrI	9482270	9483749	+	WBGene00001487	frk-1	FALSE	FALSE	FALSE	-2.4
WBGene00028938	Cbr-frm-10	4727.38	1.5387	0.255163	6.03027	1.6369e-09	3.50522e-08	chrV	7386016	7388545	-	WBGene00001496	frm-10	FALSE	FALSE	FALSE	-2.33
WBGene00041807	Cbr-frm-7	4766.77	1.08386	0.0835033	12.9799	1.59123e-38	3.17179e-36	chrV	8671716	8676398	-	WBGene00001493	frm-7	FALSE	FALSE	FALSE	-2.26
WBGene00027204	Cbr-gasr-8	1974.74	4.24873	0.372046	11.4199	3.32672e-30	5.15146e-28	chrV	14408913	14410820	-	WBGene00008144	gasr-8	FALSE	FALSE	TRUE	-1.34
WBGene00026663	Cbr-gcy-17	41.7016	1.39853	0.285186	4.90394	9.3935e-07	1.10927e-05	chrI	5055981	5060153	+	WBGene00001542	gcy-17	FALSE	FALSE	FALSE	-2.42
WBGene00027989	Cbr-gcy-22	305.232	1.45168	0.174663	8.31133	9.46347e-17	5.99044e-15	chrV	18870208	18876291	-	WBGene00001547	gcy-22	FALSE	TRUE	FALSE	-1.98
WBGene00028962	Cbr-gcy-34	168.055	1.21614	0.213047	5.70833	1.1409e-08	2.06343e-07	chrV	7468162	7471092	+	WBGene00001554	gcy-34	FALSE	FALSE	TRUE	-2.06
WBGene00270626	Cbr-glb-34	65.4063	1.35335	0.273335	4.95124	7.37418e-07	8.99544e-06	chrIV	2034164	2036257	+	WBGene00077763	glb-34	FALSE	TRUE	FALSE	-1.93
WBGene00027151	Cbr-glo-3	783.639	1.38848	0.296408	4.68436	2.80831e-06	2.94786e-05	chrX	6528641	6532689	-	WBGene00010341	glo-3	FALSE	FALSE	FALSE	-1.95
WBGene00039226	Cbr-glod-4	1118.45	1.13574	0.0860743	13.1949	9.38668e-40	1.93273e-37	chrIII	11565904	11568733	-	WBGene00006448	glod-4	FALSE	TRUE	TRUE	-1.92
WBGene00025232	Cbr-glr-7	137.578	1.07874	0.208688	5.16915	2.35159e-07	3.22324e-06	chrX	4369154	4374480	+	WBGene00001618	glr-7	FALSE	FALSE	FALSE	-1.57
WBGene00037044	Cbr-gnrr-6	116.276	1.37704	0.310875	4.42954	9.44324e-06	8.59757e-05	chrX	5453539	5456071	-	WBGene00008736	gnrr-6	FALSE	FALSE	FALSE	-1.91
WBGene00037043	Cbr-gnrr-7	237.3	1.42394	0.191858	7.42183	1.15512e-13	5.04515e-12	chrX	5444831	5446850	-	WBGene00008737	gnrr-7	FALSE	FALSE	FALSE	-1.71
WBGene00034733	Cbr-gpcp-1	1165.87	1.04026	0.103082	10.0915	6.0242e-24	7.01089e-22	chrX	8158331	8161994	-	WBGene00019612	gpcp-1	FALSE	FALSE	FALSE	-2.09
WBGene00039523	Cbr-grd-8	12.3887	1.62213	0.423021	3.83464	0.000125747	0.000825551	chrV	2106235	2107864	-	WBGene00001697	grd-8	FALSE	FALSE	TRUE	-1.52
WBGene00039540	Cbr-grl-10	93.9464	1.09112	0.228476	4.77565	1.79127e-06	1.97546e-05	chrV	2187616	2188791	+	WBGene00001719	grl-10	FALSE	FALSE	FALSE	-1.8
WBGene00027990	Cbr-grl-14	64.4991	2.83499	0.271771	10.4316	1.77961e-25	2.20825e-23	chrV	18877216	18881085	+	WBGene00001723	grl-14	FALSE	TRUE	FALSE	-1.95
WBGene00032647	Cbr-grl-17	17.2585	1.62576	0.390982	4.15813	3.20859e-05	0.000251545	chrV	4934	7775	-	WBGene00001726	grl-17	FALSE	FALSE	TRUE	-1.51
WBGene00039607	Cbr-gst-15	67.2205	1.25286	0.281743	4.44681	8.71538e-06	8.04434e-05	chrII	11061192	11061883	+	WBGene00001763	gst-15	FALSE	TRUE	TRUE	-1.72
WBGene00034798	Cbr-gyg-1	7108.71	1.49339	0.0624628	23.9084	2.50288e-126	1.51279e-123	chrX	8663463	8666609	+	WBGene00006863	gyg-1	FALSE	TRUE	FALSE	-2.2
WBGene00028506	Cbr-hdl-1	179.985	1.60959	0.245746	6.54984	5.75996e-11	1.67325e-09	chrIV	8975093	8978741	-	WBGene00001839	hdl-1	FALSE	FALSE	TRUE	-1.91
WBGene00032705	Cbr-hil-1	659.64	1.46537	0.280192	5.22988	1.69621e-07	2.40045e-06	chrV	14246100	14247608	-	WBGene00001852	hil-1	FALSE	TRUE	FALSE	-1.41
WBGene00037607	Cbr-hsp-110	129530	3.41694	0.178564	19.1356	1.27544e-81	5.55764e-79	chrIII	6580445	6583410	-	WBGene00016250	hsp-110	FALSE	TRUE	TRUE	-2.23
WBGene00033953	Cbr-hsp-4	70419.8	3.52597	0.209381	16.8399	1.24426e-63	4.16315e-61	chrII	6068461	6070855	-	WBGene00002008	hsp-4	FALSE	TRUE	TRUE	-2.19
WBGene00027569	Cbr-hsp-43	4189.42	2.44331	0.213479	11.4452	2.48638e-30	3.88228e-28	chrX	11664183	11666693	-	WBGene00002024	hsp-43	FALSE	TRUE	FALSE	-2.36
WBGene00030552	Cbr-hsp-6	60530	1.00122	0.111004	9.01963	1.88734e-19	1.48584e-17	chrV	1838361	1841064	+	WBGene00002010	hsp-6	FALSE	TRUE	FALSE	-1.75
WBGene00040668	Cbr-hsp-70	92544.8	6.42131	0.328446	19.5506	4.07866e-85	1.91055e-82	chrI	1830122	1832859	-	WBGene00002026	hsp-70	FALSE	TRUE	TRUE	-0.37
WBGene00027205	Cbr-hsp-90	421021	2.62462	0.17375	15.1058	1.4839e-51	3.97198e-49	chrV	14411353	14415025	-	WBGene00000915	hsp-90	FALSE	TRUE	FALSE	-0.96
WBGene00025024	Cbr-igeg-1	1092.7	2.27274	0.111073	20.4616	4.73269e-93	2.46324e-90	chrIV	10299801	10301546	-	WBGene00017901	igeg-1	FALSE	TRUE	FALSE	-2.32
WBGene00029032	Cbr-ikke-1	8305.74	3.22187	0.149938	21.4881	2.01277e-102	1.07752e-99	chrIII	10492527	10498905	+	WBGene00012726	Y39G8B.5	FALSE	FALSE	TRUE	-2.37
WBGene00025491	Cbr-ins-12	109.733	2.4221	0.331222	7.31262	2.61975e-13	1.07882e-11	chrII	10152389	10153070	-	WBGene00002095	ins-12	FALSE	TRUE	FALSE	-2.35
WBGene00025071	Cbr-ipla-2	3069.96	1.49017	0.202906	7.34412	2.07118e-13	8.66243e-12	chrX	3327610	3334384	-	WBGene00009801	ipla-2	FALSE	FALSE	FALSE	-1.68
WBGene00033038	Cbr-ipla-4	54.126	1.44224	0.251292	5.73929	9.50716e-09	1.73791e-07	chrI	7540022	7542258	+	WBGene00017026	ipla-4	FALSE	TRUE	FALSE	-2.27
WBGene00027911	Cbr-ipla-6.1	1499.01	2.77867	0.229292	12.1185	8.42914e-34	1.46238e-31	chrIV	6849687	6852169	+	WBGene00022233	ipla-6	FALSE	TRUE	FALSE	-1.67
WBGene00027923	Cbr-ipla-6.2	1499.01	2.77867	0.229292	12.1185	8.42914e-34	1.46238e-31	chrIV	6796428	6798910	+	WBGene00022233	ipla-6	FALSE	TRUE	FALSE	-1.61
WBGene00039903	Cbr-ippk-1	1830.91	1.92472	0.12266	15.6915	1.72833e-55	4.98211e-53	chrII	12347413	12350701	+	WBGene00012466	ippk-1	FALSE	FALSE	FALSE	-1.83
WBGene00024764	Cbr-irld-8	22.2138	1.70579	0.412761	4.13264	3.58615e-05	0.000276814	chrIV	11383736	11385510	+	WBGene00018360	irld-8	FALSE	FALSE	FALSE	-2.4
WBGene00039455	Cbr-kin-14	62.5166	2.43881	0.27031	9.02227	1.84235e-19	1.46271e-17	chrI	6726843	6730767	-	WBGene00002198	kin-14	FALSE	FALSE	FALSE	-2.38
WBGene00033568	Cbr-kin-24	11.9055	2.24838	0.428068	5.25238	1.50145e-07	2.14753e-06	chrI	9770780	9772807	+	WBGene00002206	kin-24	FALSE	FALSE	FALSE	-2.12
WBGene00041734	Cbr-kmo-2	38.1749	2.06965	0.316413	6.54096	6.11243e-11	1.77015e-09	chrV	8941182	8942861	+	WBGene00011088	kmo-2	FALSE	FALSE	FALSE	-2.36
WBGene00023987	Cbr-lact-4	1732.49	2.74369	0.140957	19.4647	2.18687e-84	9.99399e-82	chrII	3925691	3928740	-	WBGene00010877	lact-4	FALSE	FALSE	TRUE	-1.34
WBGene00041505	Cbr-lact-8	176.623	1.48425	0.204642	7.2529	4.07929e-13	1.62972e-11	chrV	9998762	10001186	-	WBGene00012777	lact-8	FALSE	TRUE	FALSE	-2.18
WBGene00027418	Cbr-lea-1	22538	2.88376	0.401033	7.19083	6.43972e-13	2.51902e-11	chrV	15405053	15409656	+	WBGene00002263	lea-1	FALSE	TRUE	FALSE	-1.77
WBGene00038838	Cbr-let-756	1857.32	1.66567	0.357122	4.66415	3.09894e-06	3.21867e-05	chrIII	3807196	3812118	-	WBGene00002881	let-756	FALSE	TRUE	FALSE	-1.33
WBGene00029397	Cbr-lgc-21	179.152	1.01076	0.320149	3.15717	0.0015931	0.00730361	chrX	19933150	19936299	-	WBGene00007903	lgc-21	FALSE	FALSE	TRUE	-1.93
WBGene00025652	Cbr-lgg-1	5809.2	1.12064	0.179123	6.25625	3.94339e-10	9.47994e-09	chrII	9393449	9396295	+	WBGene00002980	lgg-1	FALSE	TRUE	FALSE	-2.17
WBGene00023840	Cbr-lhfp-4	63.9977	1.72269	0.350318	4.9175	8.76546e-07	1.04865e-05	chrIV	499723	500808	+	WBGene00009155	lhfp-4	FALSE	FALSE	TRUE	-0.17
WBGene00027199	Cbr-lipl-8	29.8269	2.55317	0.394327	6.47475	9.49706e-11	2.60536e-09	chrV	14392599	14394668	-	WBGene00013050	lipl-8	FALSE	TRUE	FALSE	-1.56
WBGene00029248	Cbr-lips-7	48.4824	1.20237	0.346191	3.47314	0.000514403	0.00276729	chrII	16192097	16203455	-	WBGene00015645	lips-7	FALSE	FALSE	FALSE	-1.25
WBGene00029992	Cbr-lpr-7	59.3326	1.10323	0.256761	4.29672	1.73345e-05	0.0001473	chrX	401437	403495	-	WBGene00020571	lpr-7	FALSE	FALSE	FALSE	-2.4
WBGene00025696	Cbr-lron-15	1161.67	1.14836	0.145348	7.90077	2.77185e-15	1.46712e-13	chrII	9183570	9188232	+	WBGene00016974	lron-15	FALSE	FALSE	FALSE	-2.37
WBGene00039414	Cbr-madf-2	1057.76	1.80584	0.180519	10.0036	1.46945e-23	1.61959e-21	chrI	12495543	12499235	+	WBGene00009461	madf-2	TRUE	TRUE	FALSE	-1.88
WBGene00038640	Cbr-mam-5	50.186	1.11129	0.292854	3.79469	0.000147829	0.000947611	chrV	13981107	13985263	+	WBGene00011572	mam-5	FALSE	TRUE	FALSE	-2.02
WBGene00270980	Cbr-marc-2	55.4878	1.11319	0.250396	4.44573	8.75958e-06	8.06923e-05	chrII	7653357	7653994	-	WBGene00008433	2019-03-02	FALSE	FALSE	FALSE	-1.74
WBGene00040664	Cbr-marc-4	216.828	1.24354	0.185539	6.70234	2.05109e-11	6.39456e-10	chrI	1809411	1818416	+	WBGene00016903	2019-03-04	TRUE	TRUE	FALSE	-1.14
WBGene00036505	Cbr-mec-14	481.531	5.01577	0.187408	26.7639	8.50856e-158	6.13173e-155	chrIII	7926966	7930085	-	WBGene00003176	mec-14	FALSE	FALSE	FALSE	-2.44
WBGene00034002	Cbr-mib-1	22.0617	2.69323	0.419087	6.42641	1.30651e-10	3.49716e-09	chrIII	5959804	5963642	+	WBGene00012933	mib-1	FALSE	FALSE	FALSE	-2.33
WBGene00027912	Cbr-mif-4	175.763	1.66537	0.243525	6.83861	7.99654e-12	2.65188e-10	chrIV	6842261	6847820	-	WBGene00003237	mif-4	FALSE	TRUE	FALSE	-1.81
WBGene00030726	Cbr-mig-21	148.378	1.71435	0.222931	7.69005	1.47078e-14	7.21414e-13	chrIII	4088267	4089940	-	WBGene00003252	mig-21	FALSE	TRUE	TRUE	-2.31
WBGene00025126	Cbr-mlck-1	1870.41	1.00569	0.212787	4.7263	2.28648e-06	2.45512e-05	chrX	3612171	3621755	-	WBGene00013869	mlck-1	FALSE	TRUE	FALSE	-1.72
WBGene00024625	Cbr-mltn-6	90.8699	2.08617	0.218883	9.531	1.5577e-21	1.45933e-19	chrV	4131516	4136094	+	WBGene00021450	mltn-6	FALSE	FALSE	TRUE	-1.63
WBGene00026010	Cbr-mnk-1	8521.43	1.01018	0.195799	5.15926	2.47928e-07	3.38095e-06	chrII	7548003	7560315	-	WBGene00011304	mnk-1	FALSE	TRUE	FALSE	-2.37
WBGene00030002	Cbr-mrp-2	4725.09	1.13674	0.176424	6.44323	1.1696e-10	3.15775e-09	chrX	458126	466599	+	WBGene00003408	mrp-2	FALSE	FALSE	FALSE	-2.31
WBGene00027651	Cbr-nas-30	1232.47	2.78564	0.384526	7.24434	4.34545e-13	1.72868e-11	chrI	1481822	1488691	+	WBGene00003548	nas-30	FALSE	TRUE	TRUE	-1.24
WBGene00037321	Cbr-nep-6	11.5589	1.78542	0.423493	4.21594	2.48735e-05	0.000202106	chrII	13253251	13257444	+	NaN	NaN	FALSE	FALSE	FALSE	-1.79
WBGene00042679	Cbr-nex-2	2941.09	1.05519	0.136511	7.72972	1.07781e-14	5.34255e-13	chrIII	4860766	4864094	-	WBGene00003589	nex-2	FALSE	TRUE	TRUE	-2.23
WBGene00038411	Cbr-nhr-143	979.425	1.37409	0.215839	6.36628	1.9367e-10	4.99145e-09	chrV	12929468	12931345	-	WBGene00019116	nhr-143	FALSE	FALSE	FALSE	-2.11
WBGene00041906	Cbr-nhr-145	178.639	1.45935	0.223207	6.53809	6.23084e-11	1.79888e-09	cb25.NA_007	40743	45184	+	WBGene00012703	nhr-145	FALSE	FALSE	FALSE	NA
WBGene00023581	Cbr-nhr-17	1064.26	1.19781	0.157779	7.59172	3.15683e-14	1.50508e-12	chrX	14322119	14327178	+	WBGene00003616	nhr-17	FALSE	TRUE	FALSE	-2.32
WBGene00024138	Cbr-nhr-171	93.0801	1.57737	0.294064	5.36404	8.13812e-08	1.23971e-06	chrV	1516235	1520527	+	WBGene00016926	nhr-171	FALSE	TRUE	FALSE	-2.33
WBGene00032122	Cbr-nhr-173	581.336	1.15479	0.279871	4.12615	3.6889e-05	0.000283739	chrX	12107584	12111286	+	WBGene00016975	nhr-173	FALSE	FALSE	FALSE	-2.36
WBGene00028860	Cbr-nhr-178	251.163	1.0366	0.246746	4.20108	2.65649e-05	0.000213809	chrV	7030326	7032347	-	WBGene00017510	nhr-178	FALSE	TRUE	FALSE	-1.83
WBGene00026806	Cbr-nhr-2	20.5388	1.21019	0.383629	3.15459	0.00160721	0.00735932	chrI	4396410	4399126	-	WBGene00003601	nhr-2	FALSE	FALSE	TRUE	-2.16
WBGene00088410	Cbr-nhr-204	729.523	1.59492	0.194665	8.19311	2.54559e-16	1.52386e-14	chrV	5253916	5257782	-	WBGene00019816	nhr-204	FALSE	FALSE	FALSE	-0.55
WBGene00030086	Cbr-nhr-26	47.0693	1.59474	0.408975	3.89935	9.6453e-05	0.000658135	chrI	6180694	6182058	+	WBGene00011568	nhr-26	FALSE	FALSE	TRUE	-2.08
WBGene00029551	Cbr-nhr-3	978.445	1.49313	0.177155	8.42836	3.5055e-17	2.31277e-15	chrX	18720478	18723403	-	WBGene00003602	nhr-3	FALSE	FALSE	FALSE	-2.46
WBGene00034982	Cbr-nhr-45	3664.37	1.35299	0.169461	7.9841	1.41557e-15	7.80104e-14	chrX	9989602	9992973	-	WBGene00003635	nhr-45	FALSE	TRUE	FALSE	-2.39
WBGene00027824	Cbr-nhr-78	333.652	1.33367	0.137061	9.7305	2.23496e-22	2.22747e-20	chrIV	15492732	15498577	-	WBGene00003668	nhr-78	FALSE	TRUE	FALSE	-0.88
WBGene00029688	Cbr-nipi-3	5664.92	1.05904	0.200962	5.26985	1.36538e-07	1.96282e-06	chrX	17708610	17711470	-	WBGene00010700	nipi-3	FALSE	FALSE	FALSE	-2.3
WBGene00031730	Cbr-nspe-2.2	179.437	3.09301	0.342596	9.02816	1.74576e-19	1.39788e-17	chrII	14303774	14304120	-	WBGene00012589	nspe-4	FALSE	FALSE	FALSE	-2.16
WBGene00042852	Cbr-nspe-2.3	472.044	4.09343	0.294925	13.8796	8.42145e-44	1.94806e-41	cb25.NA_230	11551	11784	+	WBGene00012591	nspe-1	FALSE	FALSE	TRUE	NA
WBGene00042431	Cbr-nud-1	6413.01	2.30481	0.355142	6.48981	8.59459e-11	2.3822e-09	chrIII	13363683	13366081	-	WBGene00003829	nud-1	TRUE	TRUE	FALSE	-1.98
WBGene00042008	Cbr-nud-2	1503.03	1.44573	0.142446	10.1494	3.33475e-24	3.92976e-22	chrI	5871701	5873501	-	WBGene00011230	nud-2	FALSE	FALSE	TRUE	-2.15
WBGene00025146	Cbr-oac-14	2202.18	4.67551	0.261588	17.8736	1.89523e-71	7.24713e-69	chrX	3751727	3754304	-	WBGene00008602	oac-14	FALSE	TRUE	TRUE	-1.61
WBGene00028840	Cbr-oac-32	333.709	3.16145	0.299673	10.5497	5.09811e-26	6.58781e-24	chrV	6945495	6948009	-	WBGene00018708	oac-32	FALSE	FALSE	FALSE	-1.79
WBGene00032595	Cbr-oac-33	32.9316	2.58234	0.382005	6.75996	1.38025e-11	4.42839e-10	chrV	189904	192620	-	NaN	NaN	FALSE	FALSE	FALSE	-1.49
WBGene00024360	Cbr-oac-55	17.1153	2.07508	0.404577	5.12901	2.9127e-07	3.92628e-06	chrV	5181786	5194288	-	WBGene00006419	oac-39	FALSE	FALSE	TRUE	-1.78
WBGene00042523	Cbr-oac-6	69.8164	1.19122	0.233022	5.11206	3.18661e-07	4.27092e-06	chrV	16586371	16590737	+	WBGene00007829	oac-5	FALSE	FALSE	FALSE	-1.58
WBGene00036187	Cbr-oga-1	3916.95	2.93547	0.36299	8.08693	6.11849e-16	3.51663e-14	chrX	1960628	1964785	-	WBGene00020596	oga-1	FALSE	TRUE	FALSE	-1.7
WBGene00024736	Cbr-otpl-7	250.394	1.93413	0.215302	8.98334	2.62659e-19	2.04209e-17	chrV	1267016	1270773	-	WBGene00018480	otpl-7	FALSE	TRUE	TRUE	-1.81
WBGene00036434	Cbr-pcf-11	1970.7	1.05428	0.143813	7.33092	2.28581e-13	9.45455e-12	chrIII	7515303	7519208	-	WBGene00020092	pcf-11	FALSE	FALSE	FALSE	-2.22
WBGene00036993	Cbr-pek-1	5826.27	1.63993	0.216504	7.57459	3.6025e-14	1.70025e-12	chrX	5139565	5144608	+	WBGene00003970	pek-1	FALSE	TRUE	FALSE	-1.47
WBGene00032170	Cbr-pes-23	23.4328	1.18331	0.33463	3.53616	0.000405981	0.00225523	chrX	12367474	12370282	+	WBGene00003987	pes-23	FALSE	FALSE	TRUE	-2.43
WBGene00031333	Cbr-pho-9	406.354	2.33712	0.399856	5.84491	5.06851e-09	9.83112e-08	chrIII	8637521	8639649	-	WBGene00022181	pho-9	FALSE	FALSE	TRUE	-2.05
WBGene00038578	Cbr-pitr-4	330.557	1.12494	0.284193	3.95837	7.54615e-05	0.000530752	chrV	13685505	13688040	+	WBGene00007141	pitr-4	FALSE	TRUE	FALSE	-1.61
WBGene00025911	Cbr-pqm-1	4172.93	1.5263	0.162264	9.40625	5.14149e-21	4.67651e-19	chrII	8031327	8033023	-	WBGene00004096	pqm-1	FALSE	TRUE	FALSE	-1.2
WBGene00033282	Cbr-pqn-44	29193.3	3.94663	0.215417	18.3209	5.63835e-75	2.29665e-72	chrI	9081789	9092026	-	WBGene00004131	pqn-44	FALSE	TRUE	TRUE	-2.42
WBGene00034034	Cbr-pqn-84	10.5693	1.53179	0.416006	3.68214	0.000231281	0.00139207	chrIII	6066137	6068715	-	WBGene00004165	pqn-84	FALSE	FALSE	TRUE	-2.29
WBGene00037609	Cbr-pqn-96	1982.79	2.27102	0.135362	16.7774	3.57336e-63	1.13481e-60	chrIII	6577446	6578245	-	WBGene00004175	pqn-96	FALSE	TRUE	FALSE	-2.33
WBGene00032300	Cbr-prx-5	1624.47	1.35248	0.22325	6.05816	1.37689e-09	2.97906e-08	chrII	4701855	4706126	+	WBGene00004194	prx-5	FALSE	TRUE	FALSE	-1.82
WBGene00024376	Cbr-ptr-16	1313.81	4.35296	0.124148	35.0627	2.50143e-269	2.75702e-266	chrV	5076897	5087062	-	WBGene00004230	ptr-16	FALSE	TRUE	FALSE	-1.67
WBGene00039334	Cbr-ptr-22	2733.83	2.73149	0.20175	13.539	9.20672e-42	1.9603e-39	chrV	18130902	18143101	+	WBGene00004236	ptr-22	FALSE	TRUE	FALSE	-1.26
WBGene00041892	Cbr-rab-11.2.2	99.272	1.08121	0.280496	3.85463	0.000115905	0.000767388	cb25.NA_005	8837	10065	+	NaN	NaN	FALSE	FALSE	FALSE	NA
WBGene00035481	Cbr-rab-18	1623.09	1.07579	0.152209	7.06786	1.57345e-12	5.78074e-11	chrIII	607825	609028	+	WBGene00004277	rab-18	FALSE	FALSE	FALSE	-2.33
WBGene00040417	Cbr-rad-26	3834.39	1.16037	0.185676	6.24942	4.11981e-10	9.83348e-09	chrIV	4778586	4785272	-	WBGene00007761	rad-26	FALSE	TRUE	FALSE	-1.78
WBGene00029627	Cbr-rbg-1	1995.39	1.24215	0.185879	6.6826	2.34745e-11	7.28214e-10	chrX	18212372	18215730	+	WBGene00004317	rbg-1	FALSE	FALSE	FALSE	-1.99
WBGene00039254	Cbr-rei-1	995.667	1.39322	0.179833	7.74731	9.38582e-15	4.67718e-13	chrIII	11352855	11355203	+	WBGene00007270	rei-1	FALSE	FALSE	FALSE	-1.89
WBGene00034799	Cbr-rgs-7	1008.58	1.3436	0.118204	11.3667	6.12303e-30	9.2522e-28	chrX	8668894	8684669	+	WBGene00004350	rgs-7	FALSE	TRUE	FALSE	-2.21
WBGene00033883	Cbr-rnh-1.1	30.1146	1.1952	0.380778	3.13883	0.00169624	0.00770296	chrII	6189369	6192062	-	WBGene00022888	rnh-1.1	FALSE	FALSE	TRUE	-2.15
WBGene00037606	Cbr-rpn-3	13742.8	1.71163	0.168581	10.1532	3.20819e-24	3.80455e-22	chrIII	6583959	6585759	+	WBGene00004460	rpn-3	FALSE	TRUE	FALSE	-2.27
WBGene00042211	Cbr-scl-9	29.8865	3.24299	0.403539	8.03636	9.25467e-16	5.19176e-14	chrIV	10061129	10062661	-	WBGene00009890	scl-9	FALSE	TRUE	TRUE	-2.22
WBGene00031266	Cbr-scvp-1	12.7878	1.37797	0.40336	3.41624	0.000634926	0.00332446	chrV	10154542	10155451	-	WBGene00010237	scvp-1	TRUE	TRUE	TRUE	-2.07
WBGene00037185	Cbr-sdz-13	12.8209	1.35739	0.427575	3.17463	0.00150026	0.00692035	chrIV	11938652	11940457	-	WBGene00008755	sdz-13	FALSE	FALSE	FALSE	-1.89
WBGene00026994	Cbr-sdz-32	45.7311	1.03125	0.301702	3.41811	0.000630587	0.00330498	chrII	5021503	5022198	-	WBGene00021717	sdz-32	FALSE	TRUE	FALSE	-1.64
WBGene00040985	Cbr-sdz-34.1	13.6057	1.48806	0.427685	3.47934	0.000502659	0.00271559	chrV	2898545	2901575	+	NaN	NaN	FALSE	FALSE	FALSE	-1.89
WBGene00042112	Cbr-sdz-34.3	17.3837	3.02171	0.422218	7.15676	8.26072e-13	3.19796e-11	cb25.NA_055	37246	40297	-	NaN	NaN	FALSE	FALSE	FALSE	NA
WBGene00040981	Cbr-sdz-34.4	12.8325	1.97324	0.427265	4.61831	3.86877e-06	3.90988e-05	chrV	2886806	2889863	-	NaN	NaN	FALSE	TRUE	FALSE	-1.8
WBGene00042111	Cbr-sdz-34.6	14.3912	1.9829	0.401292	4.94129	7.76086e-07	9.4059e-06	cb25.NA_055	32165	35229	-	NaN	NaN	FALSE	FALSE	FALSE	NA
WBGene00271260	Cbr-selt-1.2	9.31151	2.12524	0.42399	5.01248	5.37336e-07	6.73449e-06	chrV	10295864	10296874	+	WBGene00009238	selt-1.2	FALSE	FALSE	FALSE	-2.42
WBGene00037808	Cbr-sip-1	227.936	1.23687	0.27853	4.44071	8.96611e-06	8.23116e-05	chrIII	5031550	5032185	-	WBGene00004798	sip-1	FALSE	TRUE	FALSE	-1.61
WBGene00027755	Cbr-skr-19	438.7	1.30576	0.200185	6.52278	6.90167e-11	1.97732e-09	chrX	17053457	17054481	-	WBGene00004825	skr-19	FALSE	FALSE	FALSE	-2.29
WBGene00027754	Cbr-skr-20	500.915	1.25064	0.215765	5.79629	6.7799e-09	1.26908e-07	chrX	17052693	17053479	-	WBGene00004826	skr-20	FALSE	FALSE	FALSE	-2.3
WBGene00033225	Cbr-slc-17.3	43.3944	1.3574	0.289576	4.68756	2.76486e-06	2.90714e-05	chrIII	12431482	12436486	-	WBGene00015333	slc-17.3	FALSE	FALSE	FALSE	-1.31
WBGene00025729	Cbr-snf-5	26.9548	1.41657	0.39752	3.56352	0.000365912	0.00206447	chrII	8979675	8982601	+	WBGene00004904	snf-5	FALSE	FALSE	TRUE	-2.22
WBGene00041627	Cbr-sodh-2	179.56	1.05791	0.215493	4.90925	9.14234e-07	1.08624e-05	chrV	9478616	9479746	-	WBGene00010791	sodh-2	FALSE	FALSE	TRUE	-2.44
WBGene00032965	Cbr-spe-4	38.1427	2.37234	0.39784	5.96306	2.47551e-09	5.11961e-08	chrI	7237071	7240024	+	WBGene00004958	spe-4	FALSE	FALSE	TRUE	-2.34
WBGene00031316	Cbr-spe-41	16.9797	1.64895	0.387083	4.25994	2.04486e-05	0.000170514	chrIII	8549399	8552850	+	WBGene00004976	spe-41	FALSE	FALSE	FALSE	-2.51
WBGene00087797	Cbr-spe-45	71.4409	2.04794	0.281631	7.27172	3.54936e-13	1.43949e-11	chrIV	9348992	9351090	-	WBGene00009217	spe-45	FALSE	FALSE	TRUE	-1.66
WBGene00038213	Cbr-spe-49	43.4467	2.50895	0.369894	6.78287	1.17811e-11	3.80591e-10	chrV	12017268	12021544	+	WBGene00019667	spe-49	FALSE	TRUE	TRUE	-2.28
WBGene00035655	Cbr-spe-9	9.99612	1.7817	0.424546	4.19671	2.7082e-05	0.000217317	chrI	13555033	13559408	-	WBGene00004963	spe-9	FALSE	FALSE	FALSE	-1.26
WBGene00033577	Cbr-spg-20	701.812	1.02606	0.0973688	10.5378	5.78153e-26	7.40771e-24	chrI	9804355	9806538	+	WBGene00019006	spg-20	FALSE	FALSE	TRUE	-2.11
WBGene00029585	Cbr-sprr-2	1097.85	3.44013	0.172992	19.886	5.37563e-88	2.58264e-85	chrX	18475241	18478480	-	WBGene00009629	sprr-2	FALSE	FALSE	FALSE	-2.13
WBGene00037838	Cbr-sra-14	19.0965	1.65198	0.371808	4.44311	8.8667e-06	8.15989e-05	chrII	1584677	1589066	+	WBGene00005040	sra-14	FALSE	TRUE	FALSE	-1.88
WBGene00029424	Cbr-sra-38	6.30287	1.72974	0.427761	4.04372	5.261e-05	0.00038657	chrX	19697781	19700196	-	WBGene00005064	sra-38	FALSE	FALSE	FALSE	-2.11
WBGene00032631	Cbr-srd-11	11.2721	1.4706	0.414588	3.54714	0.000389437	0.00217883	chrV	57710	59127	-	WBGene00005089	srd-11	FALSE	FALSE	TRUE	-1.93
WBGene00029494	Cbr-srd-50	17.5448	2.60221	0.407718	6.38239	1.74342e-10	4.54964e-09	chrX	19183538	19184887	-	WBGene00005128	srd-50	FALSE	FALSE	TRUE	-1.37
WBGene00029493	Cbr-srd-51	28.4514	2.16407	0.336024	6.44024	1.19286e-10	3.2113e-09	chrX	19185143	19187340	-	WBGene00005129	srd-51	FALSE	FALSE	FALSE	-1.54
WBGene00040570	Cbr-srd-53	15.9599	1.49525	0.409474	3.65163	0.00026058	0.00154119	chrI	6834016	6836263	-	WBGene00005131	srd-53	FALSE	FALSE	FALSE	-2.24
WBGene00039030	Cbr-srd-8	7.05686	1.58125	0.426847	3.7045	0.00021181	0.00129231	chrIV	6156100	6157452	-	WBGene00005086	srd-8	FALSE	TRUE	FALSE	-2.06
WBGene00039878	Cbr-srg-17	13.0399	1.64158	0.417349	3.93335	8.37714e-05	0.000582637	chrII	12252739	12256389	-	WBGene00005174	srg-17	FALSE	FALSE	TRUE	-2.08
WBGene00038293	Cbr-srg-30	16.4154	1.1986	0.39078	3.0672	0.00216073	0.00944379	chrV	12405514	12406833	-	WBGene00005187	srg-30	FALSE	TRUE	FALSE	-2.07
WBGene00027202	Cbr-srh-17	128.163	4.53255	0.299802	15.1185	1.22347e-51	3.32235e-49	chrV	14401434	14402193	+	WBGene00005242	srh-17	FALSE	FALSE	TRUE	-1.46
WBGene00270696	Cbr-srh-28	29.6877	2.0774	0.329901	6.29704	3.03383e-10	7.45997e-09	chrV	12455167	12456547	-	WBGene00005251	srh-28	FALSE	TRUE	FALSE	-2.21
WBGene00033817	Cbr-srh-39	66.5756	2.03049	0.261728	7.75801	8.62745e-15	4.31074e-13	chrII	6505560	6507606	-	WBGene00005262	srh-39	FALSE	FALSE	TRUE	-2.48
WBGene00040011	Cbr-srh-79	5.12637	1.49576	0.419283	3.56742	0.000360514	0.00203831	chrIII	13245457	13249411	-	WBGene00005300	srh-79	FALSE	TRUE	FALSE	-2.08
WBGene00035658	Cbr-sri-11	21.9673	1.58884	0.366118	4.33968	1.42687e-05	0.000124571	chrI	13584361	13589075	-	WBGene00005523	sri-11	FALSE	FALSE	FALSE	-1.38
WBGene00028319	Cbr-sri-19	21.4767	1.15742	0.360744	3.20842	0.00133467	0.0062629	chrIV	7427897	7430126	-	WBGene00005531	sri-19	FALSE	FALSE	FALSE	-2.25
WBGene00027471	Cbr-sri-2	13.6196	1.27417	0.416846	3.05668	0.00223803	0.00969121	chrV	15575813	15577654	-	WBGene00005513	sri-1	FALSE	FALSE	FALSE	-1.52
WBGene00040979	Cbr-srj-9	16.9847	2.12361	0.401764	5.28573	1.25208e-07	1.8158e-06	chrV	2881124	2883692	+	WBGene00005597	srj-9	FALSE	FALSE	FALSE	-2.13
WBGene00028070	Cbr-srt-27	21.9877	2.04897	0.396288	5.17041	2.33583e-07	3.20399e-06	chrV	19298755	19300076	-	WBGene00019740	srt-31	FALSE	FALSE	FALSE	-2.39
WBGene00028230	Cbr-srtx-1	21.1494	1.79676	0.39448	4.55475	5.24472e-06	5.14235e-05	chrIV	7752143	7753771	-	WBGene00015214	srtx-1	FALSE	FALSE	FALSE	-1.98
WBGene00040382	Cbr-sru-6	21.5769	2.66199	0.389735	6.83026	8.47611e-12	2.79607e-10	chrIV	5072997	5076000	+	WBGene00005669	sru-6	FALSE	FALSE	FALSE	-0.52
WBGene00032549	Cbr-srx-42	20.5371	2.06503	0.417678	4.94408	7.65049e-07	9.3023e-06	chrV	337883	340164	-	WBGene00005933	srx-42	FALSE	TRUE	FALSE	-1.54
WBGene00025332	Cbr-sss-1	25.2276	1.49537	0.343294	4.35594	1.32497e-05	0.000116773	chrI	8063790	8064923	-	WBGene00017851	F27C1.1	FALSE	FALSE	FALSE	-2.36
WBGene00033794	Cbr-ssu-1	286.584	4.11743	0.215911	19.0701	4.47822e-81	1.90701e-78	chrV	18452481	18456095	+	WBGene00013748	ssu-1	FALSE	TRUE	FALSE	-1.62
WBGene00027123	Cbr-sti-1	10089.9	1.10386	0.18948	5.82573	5.68646e-09	1.085e-07	chrIV	12237498	12238977	+	WBGene00019983	sti-1	FALSE	FALSE	FALSE	-2.14
WBGene00036594	Cbr-sto-1	202.981	1.21422	0.265231	4.57799	4.69463e-06	4.65907e-05	chrX	13123401	13125110	+	WBGene00006063	sto-1	FALSE	FALSE	FALSE	-2.25
WBGene00032583	Cbr-str-165	12.6532	2.51965	0.426163	5.91242	3.37113e-09	6.79924e-08	chrV	232985	234679	+	WBGene00006210	str-165	FALSE	FALSE	FALSE	-1.44
WBGene00038482	Cbr-str-177	9.46005	1.62448	0.427992	3.79558	0.000147298	0.00094453	chrV	13201746	13203029	-	WBGene00006221	str-177	FALSE	FALSE	FALSE	-1.77
WBGene00038202	Cbr-str-204	67.7399	3.33803	0.412959	8.0832	6.30891e-16	3.61499e-14	chrV	11955768	11957160	-	WBGene00006237	str-204	FALSE	FALSE	TRUE	-2.5
WBGene00032550	Cbr-str-252	33.8542	2.99186	0.419496	7.13202	9.89059e-13	3.73629e-11	chrV	336024	337304	+	WBGene00006278	str-252	FALSE	FALSE	FALSE	-1.79
WBGene00028671	Cbr-str-30	33.5365	1.32189	0.335473	3.94036	8.13582e-05	0.00056775	chrV	6238047	6239573	+	WBGene00006096	str-30	FALSE	TRUE	TRUE	-1.34
WBGene00028670	Cbr-str-31	18.1252	2.93212	0.40983	7.15449	8.39872e-13	3.238e-11	chrV	6236019	6237679	-	WBGene00006096	str-30	FALSE	FALSE	TRUE	-1.34
WBGene00032488	Cbr-str-90	26.3616	1.60136	0.365605	4.38003	1.18665e-05	0.000105626	chrV	567407	569513	+	WBGene00006149	str-90	FALSE	TRUE	FALSE	-1.69
WBGene00035122	Cbr-sulp-2	297.349	1.03729	0.171227	6.05794	1.37877e-09	2.9797e-08	chrX	10898251	10902552	-	WBGene00017464	sulp-2	FALSE	FALSE	FALSE	-2.55
WBGene00035342	Cbr-sulp-6	12.8536	1.35665	0.407558	3.32872	0.00087245	0.00436039	chrI	3756251	3759628	+	WBGene00020914	sulp-6	FALSE	TRUE	TRUE	-1.67
WBGene00037757	Cbr-tasp-1	2157.22	1.61486	0.244245	6.61165	3.80065e-11	1.1394e-09	chrIII	5234786	5237574	+	WBGene00010480	tasp-1	FALSE	FALSE	FALSE	-2.46
WBGene00029630	Cbr-tbc-1	1362.16	1.30583	0.17418	7.49701	6.52876e-14	2.9477e-12	chrX	18204806	18207964	+	WBGene00008974	tbc-1	FALSE	TRUE	FALSE	-1.77
WBGene00086847	Cbr-tmem-107	83.0478	1.00321	0.3095	3.24139	0.00118948	0.00567396	chrI	14980006	14980460	+	WBGene00043308	tmem-107	FALSE	FALSE	FALSE	-2.03
WBGene00040430	Cbr-tpra-1	1215.54	1.87142	0.189044	9.89939	4.18812e-23	4.40859e-21	chrIV	4668331	4671113	-	WBGene00008366	tpra-1	FALSE	FALSE	FALSE	-1.71
WBGene00029175	Cbr-tre-5	501.345	1.46995	0.24948	5.89207	3.81393e-09	7.63478e-08	chrII	16459820	16462324	-	WBGene00006611	tre-5	FALSE	FALSE	TRUE	-2.36
WBGene00038513	Cbr-try-5	58.5646	1.2623	0.24937	5.06195	4.14986e-07	5.38476e-06	chrV	13366256	13367981	+	WBGene00006623	try-5	FALSE	FALSE	TRUE	-2.11
WBGene00033569	Cbr-try-6	49.1485	2.89584	0.335159	8.64021	5.61086e-18	3.93748e-16	chrI	9775682	9778066	-	WBGene00006624	try-6	FALSE	TRUE	TRUE	-2.21
WBGene00041947	Cbr-tsp-1	20.4526	1.72372	0.367621	4.68886	2.74733e-06	2.89374e-05	cb25.NA_018	4655	5773	+	WBGene00006627	tsp-1	FALSE	FALSE	TRUE	NA
WBGene00036491	Cbr-ttbk-4	23.0973	1.2289	0.402651	3.05202	0.00227305	0.0098247	chrIII	7881972	7883501	+	WBGene00012169	ttbk-4	FALSE	TRUE	TRUE	-2.17
WBGene00037176	Cbr-ttr-14	22.5807	2.33206	0.427901	5.44999	5.03736e-08	8.04646e-07	chrX	6121478	6124685	-	WBGene00011460	ttr-14	FALSE	FALSE	TRUE	-2.42
WBGene00028345	Cbr-ttr-17	1311.02	1.03342	0.125359	8.24363	1.67061e-16	1.02968e-14	chrIV	7329219	7330040	+	WBGene00012383	ttr-17	FALSE	TRUE	FALSE	-2.24
WBGene00029927	Cbr-ttr-37	175.549	1.60006	0.362384	4.41537	1.00836e-05	9.12963e-05	chrX	115575	118752	-	WBGene00017667	ttr-37	FALSE	FALSE	FALSE	-2.3
WBGene00035349	Cbr-tyr-5	20.2136	1.77222	0.376715	4.7044	2.54615e-06	2.70143e-05	chrI	3781879	3784477	+	WBGene00021553	tyr-5	FALSE	FALSE	TRUE	-2.42
WBGene00030704	Cbr-ubq-1	36245.5	1.27109	0.14091	9.02059	1.87084e-19	1.47907e-17	chrIII	4173232	4176115	+	WBGene00006728	ubq-2	FALSE	TRUE	FALSE	-1.99
WBGene00032063	Cbr-ubql-1	4146.04	1.03522	0.0756613	13.6824	1.29428e-42	2.88701e-40	chrI	6424562	6430887	-	WBGene00008852	ubql-1	FALSE	TRUE	FALSE	-2.19
WBGene00037608	Cbr-ufbp-1	2376.65	2.27978	0.0786998	28.9681	1.66204e-184	1.41553e-181	chrIII	6578367	6579909	-	WBGene00022865	ufbp-1	FALSE	FALSE	FALSE	-2.32
WBGene00040667	Cbr-uggt-2	1373.08	2.96354	0.271352	10.9214	9.10895e-28	1.27369e-25	chrI	1825729	1840975	+	NaN	NaN	FALSE	TRUE	FALSE	-1.03
WBGene00042767	Cbr-ugt-18	139.452	2.20229	0.377971	5.8266	5.65664e-09	1.08152e-07	cb25.NA_209	22257	23522	-	WBGene00013900	ugt-18	FALSE	FALSE	FALSE	NA
WBGene00030189	Cbr-ugt-44	3188.61	3.2271	0.33363	9.67271	3.93826e-22	3.82337e-20	chrIV	12460635	12462856	-	WBGene00008486	ugt-44	FALSE	TRUE	TRUE	-1.06
WBGene00038405	Cbr-unc-23	10981.4	2.10542	0.332094	6.33982	2.30032e-10	5.82448e-09	chrV	12896261	12901516	+	WBGene00006760	unc-23	FALSE	FALSE	TRUE	-2.28
WBGene00035594	Cbr-unc-45	10584.5	1.49329	0.200182	7.45968	8.67322e-14	3.84185e-12	chrIII	25845	29139	-	WBGene00006781	unc-45	FALSE	TRUE	FALSE	-2.18
WBGene00031925	Cbr-vamp-7	259.727	1.02502	0.167526	6.1186	9.44006e-10	2.10821e-08	chrIV	16598372	16599962	+	WBGene00022077	vamp-7	FALSE	TRUE	FALSE	-1.81
WBGene00037175	Cbr-vap-2	41.0561	1.69762	0.353293	4.80513	1.5465e-06	1.73721e-05	chrX	6117444	6121268	+	WBGene00011462	vap-2	FALSE	FALSE	TRUE	-2.41
WBGene00032973	Cbr-wdr-23	4428.21	1.0117	0.0960113	10.5373	5.81167e-26	7.40771e-24	chrI	7279917	7290890	-	WBGene00008419	wdr-23	FALSE	TRUE	FALSE	-2.45
WBGene00039224	Cbr-wht-3	47.9279	1.41725	0.29581	4.79108	1.65884e-06	1.84133e-05	chrIII	11570505	11575483	+	WBGene00007631	wht-3	FALSE	TRUE	TRUE	-1.89
WBGene00038860	Cbr-wht-6	62.3404	2.82235	0.282109	10.0045	1.45677e-23	1.61512e-21	chrIII	3733678	3737607	+	WBGene00007060	wht-6	FALSE	TRUE	TRUE	-1.77
WBGene00032852	Cbr-zip-12	849.681	1.22087	0.175914	6.94017	3.91638e-12	1.34644e-10	chrIII	1918641	1922828	+	WBGene00013560	zip-12	FALSE	TRUE	FALSE	-1.06
WBGene00030996	Cbr-zip-5	684.684	2.34235	0.175505	13.3464	1.2439e-40	2.58967e-38	chrV	11290721	11294853	+	WBGene00007932	zip-5	FALSE	FALSE	TRUE	-2.28
WBGene00030765	Cbr-zip-8	39.7724	1.34163	0.361229	3.71408	0.000203944	0.00125412	chrIII	3896793	3900475	+	WBGene00017755	zip-8	FALSE	TRUE	FALSE	-2
